# Supplementary material for: Action Mechanism Underlying Improvement Effect of Fuzi Lizhong Decoction on Nonalcoholic Fatty Liver Disease: A Study Based on Network Pharmacology and Molecular Docking
Source: Hindawi journal article supplement (doi:10.1155/2022/1670014), 2022-01-20
Supplement: f1 [file 1670014.f1.zip]

Intersection targets

MAPK8  
BCHE  
TREM1  
NR1I3  
MMP13  
F2  
ADH1B  
PLAU  
TTR  
SULT2A1  
PPARG  
PLG  
ESRRG  
SHBG  
NR1H4  
CFD  
CASP3  
LCN2  
FABP4  
ALB  
GSTP1  
GC  
MAPK14  
PIK3CG  
IGF1R  
CES1  
HSPA8  
NQO1  
CTSD  
GBA  
SPARC  
GSR  
TGFB2  
CA2  
PPARD  
NR1H2  
EGFR  
AKR1B1  
CTSS  
CASP7  
AR  
MAPK10  
HSP90AA1  
PTPN1  
CYP19A1  
FAP  
HSD11B1  
RORA  
MAPK1  
ESR1  
NR3C2  
ADAM17  
CTSB  
PRDX5  
B3GAT1  
RXRA  
TGFB1  
APOA2  
HSD17B11  
DPP4  
SELP
