# Supplementary material for: Action Mechanism Underlying Improvement Effect of Fuzi Lizhong Decoction on Nonalcoholic Fatty Liver Disease: A Study Based on Network Pharmacology and Molecular Docking
Source: Hindawi journal article supplement (doi:10.1155/2022/1670014), 2022-01-20
Supplement: f1 [file 1670014.f1.zip]

| Information of Biological process                                   |             |             |       |
|---------------------------------------------------------------------|-------------|-------------|-------|
| Pathway                                                             | Enrichment  | P-value     | Count |
| GO:0071407:cellular response to organic cyclic compound             | 0.032520325 | 5.91732E-15 | 16    |
| GO:0008202:steroid metabolic process                                | 0.042424242 | 9.71462E-15 | 14    |
| GO:0048545:response to steroid hormone                              | 0.042168675 | 1.05569E-14 | 14    |
| GO:0031667:response to nutrient levels                              | 0.030612245 | 1.12737E-13 | 15    |
| GO:0009991:response to extracellular stimulus                       | 0.029126214 | 2.31182E-13 | 15    |
| GO:0006367:transcription initiation from RNA polymerase II promoter | 0.058823529 | 2.60556E-13 | 11    |
| GO:0045055:regulated exocytosis                                     | 0.021794872 | 4.88667E-13 | 17    |
| GO:0002444:myeloid leukocyte mediated immunity                      | 0.027173913 | 6.26557E-13 | 15    |
| GO:0071396:cellular response to lipid                               | 0.026548673 | 8.74461E-13 | 15    |
| GO:0002446:neutrophil mediated immunity                             | 0.028       | 2.74785E-12 | 14    |
| GO:0006352:DNA-templated transcription, initiation                  | 0.044176707 | 5.92396E-12 | 11    |
| GO:0002274:myeloid leukocyte activation                             | 0.022727273 | 7.97283E-12 | 15    |
| GO:0032870:cellular response to hormone stimulus                    | 0.022556391 | 8.86979E-12 | 15    |
| GO:0030522:intracellular receptor signaling pathway                 | 0.039711191 | 1.86948E-11 | 11    |
| GO:0042060:wound healing                                            | 0.023850085 | 2.32515E-11 | 14    |
| GO:0032963:collagen metabolic process                               | 0.073394495 | 9.71377E-11 | 8     |
| GO:0043299:leukocyte degranulation                                  | 0.024208566 | 1.10015E-10 | 13    |
| GO:0010817:regulation of hormone levels                             | 0.024163569 | 1.12559E-10 | 13    |
| GO:0002275:myeloid cell activation involved in immune response      | 0.023636364 | 1.47551E-10 | 13    |
| GO:0043627:response to estrogen                                     | 0.098591549 | 1.88397E-10 | 7     |

| Information of Cellular component       |             |             |       |
|-----------------------------------------|-------------|-------------|-------|
| Pathway                                 | Enrichment  | Pvalue      | Count |
| GO:0031983:vesicle lumen                | 0.038235294 | 3.63803E-13 | 13    |
| GO:0034774:secretory granule lumen      | 0.037267081 | 4.34675E-12 | 12    |
| GO:1904813:ficolin-1-rich granule lumen | 0.072580645 | 6.6862E-12  | 9     |
| GO:0060205:cytoplasmic vesicle lumen    | 0.03539823  | 7.92298E-12 | 12    |
| GO:0005775:vacuolar lumen               | 0.052023121 | 1.34419E-10 | 9     |
| GO:0101002:ficolin-1-rich granule       | 0.048648649 | 2.44312E-10 | 9     |
| GO:0043202:lysosomal lumen              | 0.072916667 | 1.61899E-09 | 7     |
| GO:0072562:blood microparticle          | 0.047945205 | 3.02757E-08 | 7     |

|                                             |             |             |    |
|---------------------------------------------|-------------|-------------|----|
| GO:0000323:lytic vacuole                    | 0.015602837 | 3.03115E-07 | 11 |
| GO:0005764:lysosome                         | 0.015602837 | 3.03115E-07 | 11 |
| GO:0045121:membrane raft                    | 0.024615385 | 5.03441E-07 | 8  |
| GO:0098857:membrane microdomain             | 0.024615385 | 5.03441E-07 | 8  |
| GO:0044437:vacuolar part                    | 0.016977929 | 5.18034E-07 | 10 |
| GO:0098589:membrane region                  | 0.023668639 | 6.76365E-07 | 8  |
| GO:0005773:vacuole                          | 0.013767209 | 1.03746E-06 | 11 |
| GO:0031091:platelet alpha granule           | 0.054945055 | 1.63393E-06 | 5  |
| GO:0031093:platelet alpha granule lumen     | 0.059701493 | 1.38406E-05 | 4  |
| GO:0043235:receptor complex                 | 0.014814815 | 2.10842E-05 | 8  |
| GO:0005925:focal adhesion                   | 0.016706444 | 3.3739E-05  | 7  |
| GO:0005924:cell-substrate adherens junction | 0.016627078 | 3.47737E-05 | 7  |

#### Information of Molecular Function

| Pathway                                                                    | Enrichment  | Pvalue      | Count |
|----------------------------------------------------------------------------|-------------|-------------|-------|
| GO:0004879:nuclear receptor activity                                       | 0.211538462 | 1.08121E-19 | 11    |
| GO:0098531:transcription factor activity, direct ligand regulated sequence | 0.211538462 | 1.08121E-19 | 11    |
| GO:0008289:lipid binding                                                   | 0.024173028 | 2.39568E-15 | 19    |
| GO:0005496:steroid binding                                                 | 0.1         | 1.57454E-14 | 10    |
| GO:0004175:endopeptidase activity                                          | 0.029411765 | 9.87877E-12 | 13    |
| GO:0033293:monocarboxylic acid binding                                     | 0.0875      | 4.43265E-10 | 7     |
| GO:0070011:peptidase activity, acting on L-amino acid peptides             | 0.021103896 | 5.8798E-10  | 13    |
| GO:0008233:peptidase activity                                              | 0.020440252 | 8.66006E-10 | 13    |
| GO:0003707:steroid hormone receptor activity                               | 0.192307692 | 2.57432E-09 | 5     |
| GO:0005504:fatty acid binding                                              | 0.128205128 | 2.20515E-08 | 5     |
| GO:0031406:carboxylic acid binding                                         | 0.036363636 | 2.53927E-08 | 8     |
| GO:0043177:organic acid binding                                            | 0.034482759 | 3.83176E-08 | 8     |
| GO:0004707:MAP kinase activity                                             | 0.2         | 9.44089E-08 | 4     |
| GO:0001223:transcription coactivator binding                               | 0.153846154 | 2.88493E-07 | 4     |
| GO:0030235:nitric-oxide synthase regulator activity                        | 0.333333333 | 8.07195E-07 | 3     |
| GO:0008134:transcription factor binding                                    | 0.016025641 | 8.74154E-07 | 10    |
| GO:0016209:antioxidant activity                                            | 0.057471264 | 1.30687E-06 | 5     |
| GO:0004252:serine-type endopeptidase activity                              | 0.035294118 | 1.87909E-06 | 6     |

|                                     |             |             |   |
|-------------------------------------|-------------|-------------|---|
| GO:0051427:hormone receptor binding | 0.034682081 | 2.07983E-06 | 6 |
| GO:0042562:hormone binding          | 0.050505051 | 2.47986E-06 | 5 |

#### Information of KEGG

| Pathway                                                       | Enrichment  | P-value     | Count |
|---------------------------------------------------------------|-------------|-------------|-------|
| hsa05200:Pathways in cancer                                   | 0.032986111 | 8.15617E-18 | 19    |
| hsa04659:Th17 cell differentiation                            | 0.080357143 | 2.64146E-12 | 9     |
| hsa04657:IL-17 signaling pathway                              | 0.084210526 | 3.18178E-11 | 8     |
| hsa04068:foxo signaling pathway                               | 0.058394161 | 6.09699E-10 | 8     |
| hsa04210:Apoptosis                                            | 0.052980132 | 1.32278E-09 | 8     |
| hsa01522:Endocrine resistance                                 | 0.072916667 | 1.61899E-09 | 7     |
| hsa04010:MAPK signaling pathway                               | 0.03125     | 1.70088E-09 | 10    |
| hsa04933:AGE-RAGE signaling pathway in diabetic complications | 0.065420561 | 3.47698E-09 | 7     |
| hsa04140:Autophagy - animal                                   | 0.045454545 | 4.27613E-07 | 6     |
| hsa03320:PPAR signaling pathway                               | 0.058139535 | 1.23381E-06 | 5     |
| hsa04976:Bile secretion                                       | 0.053333333 | 2.16654E-05 | 4     |
| hsa04918:Thyroid hormone synthesis                            | 0.037974684 | 0.000682115 | 3     |
| hsa00980:Metabolism of xenobiotics by cytochrome P450         | 0.052631579 | 2.28321E-05 | 4     |
| hsa04932:Non-alcoholic fatty liver disease                    | 0.029585799 | 3.34152E-05 | 5     |
| hsa04668:TNF signaling pathway                                | 0.052173913 | 1.89083E-07 | 6     |
| hsa04920:Adipocytokine signaling pathway                      | 0.041666667 | 0.000520012 | 3     |
