# Supplementary material for: Action Mechanism Underlying Improvement Effect of Fuzi Lizhong Decoction on Nonalcoholic Fatty Liver Disease: A Study Based on Network Pharmacology and Molecular Docking
Source: Hindawi journal article supplement (doi:10.1155/2022/1670014), 2022-01-20
Supplement: f1 [file 1670014.f1.zip]

| #node1 | node2   | combined_score |
|--------|---------|----------------|
| ADAM17 | MAPK1   | 0.654          |
| ADAM17 | MAPK14  | 0.672          |
| ADAM17 | MMP13   | 0.463          |
| ADAM17 | EGFR    | 0.846          |
| ADAM17 | ALB     | 0.63           |
| ADAM17 | F2      | 0.588          |
| ADAM17 | CASP3   | 0.408          |
| ADAM17 | MAPK8   | 0.441          |
| ADH1B  | GSTP1   | 0.743          |
| AKR1B1 | GSR     | 0.615          |
| AKR1B1 | EGFR    | 0.426          |
| AKR1B1 | CASP3   | 0.4            |
| AKR1B1 | MAPK8   | 0.434          |
| AKR1B1 | PTPN1   | 0.439          |
| AKR1B1 | NQO1    | 0.448          |
| AKR1B1 | ALB     | 0.576          |
| AKR1B1 | GSTP1   | 0.646          |
| ALB    | MAPK1   | 0.687          |
| ALB    | GSR     | 0.672          |
| ALB    | SULT2A1 | 0.513          |
| ALB    | MAPK14  | 0.593          |
| ALB    | SPARC   | 0.95           |
| ALB    | CTSD    | 0.585          |
| ALB    | TTR     | 0.93           |
| ALB    | FABP4   | 0.456          |
| ALB    | MMP13   | 0.495          |
| ALB    | SELP    | 0.619          |
| ALB    | BCHE    | 0.757          |
| ALB    | IGF1R   | 0.502          |
| ALB    | EGFR    | 0.767          |
| ALB    | CA2     | 0.567          |
| ALB    | PPARG   | 0.588          |

|       |          |       |
|-------|----------|-------|
| ALB   | TGFBR1   | 0.4   |
| ALB   | PTPN1    | 0.4   |
| ALB   | GSTP1    | 0.404 |
| ALB   | CASP7    | 0.42  |
| ALB   | CES1     | 0.492 |
| ALB   | GBA      | 0.495 |
| ALB   | CYP19A1  | 0.496 |
| ALB   | PLAU     | 0.502 |
| ALB   | NR3C2    | 0.506 |
| ALB   | MAPK10   | 0.512 |
| ALB   | NQO1     | 0.523 |
| ALB   | HSPA8    | 0.559 |
| ALB   | HSP90AA1 | 0.56  |
| ALB   | GC       | 0.57  |
| ALB   | CTSB     | 0.604 |
| ALB   | AR       | 0.622 |
| ALB   | DPP4     | 0.671 |
| ALB   | LCN2     | 0.677 |
| ALB   | MAPK8    | 0.686 |
| ALB   | ESR1     | 0.7   |
| ALB   | SHBG     | 0.738 |
| ALB   | CASP3    | 0.835 |
| ALB   | RXRA     | 0.917 |
| ALB   | CFD      | 0.929 |
| ALB   | NR1H4    | 0.953 |
| ALB   | F2       | 0.96  |
| ALB   | PLG      | 0.978 |
| ALB   | APOA2    | 0.981 |
| APOA2 | TTR      | 0.743 |
| APOA2 | F2       | 0.838 |
| APOA2 | PLG      | 0.405 |
| APOA2 | GC       | 0.536 |
| APOA2 | RXRA     | 0.905 |

|       |          |       |
|-------|----------|-------|
| AR    | MAPK1    | 0.782 |
| AR    | SULT2A1  | 0.577 |
| AR    | MAPK14   | 0.945 |
| AR    | IGF1R    | 0.783 |
| AR    | EGFR     | 0.803 |
| AR    | CA2      | 0.5   |
| AR    | CASP3    | 0.746 |
| AR    | HSP90AA1 | 0.988 |
| AR    | NR3C2    | 0.945 |
| AR    | CASP7    | 0.456 |
| AR    | ESR1     | 0.587 |
| AR    | GSTP1    | 0.659 |
| AR    | SHBG     | 0.742 |
| AR    | CYP19A1  | 0.879 |
| AR    | HSPA8    | 0.936 |
| AR    | MAPK8    | 0.945 |
| BCHE  | TTR      | 0.549 |
| BCHE  | F2       | 0.701 |
| CA2   | GC       | 0.565 |
| CASP3 | MAPK1    | 0.814 |
| CASP3 | GSR      | 0.59  |
| CASP3 | MAPK14   | 0.989 |
| CASP3 | CTSD     | 0.556 |
| CASP3 | MMP13    | 0.454 |
| CASP3 | SELP     | 0.407 |
| CASP3 | IGF1R    | 0.583 |
| CASP3 | EGFR     | 0.751 |
| CASP3 | PPARG    | 0.578 |
| CASP3 | F2       | 0.451 |
| CASP3 | PLG      | 0.497 |
| CASP3 | LCN2     | 0.433 |
| CASP3 | CYP19A1  | 0.436 |
| CASP3 | HSPA8    | 0.531 |

|       |          |       |
|-------|----------|-------|
| CASP3 | NQO1     | 0.566 |
| CASP3 | CTSB     | 0.631 |
| CASP3 | ESR1     | 0.665 |
| CASP3 | HSP90AA1 | 0.676 |
| CASP3 | MAPK10   | 0.733 |
| CASP3 | MAPK8    | 0.901 |
| CASP3 | CASP7    | 0.935 |
| CASP7 | MAPK1    | 0.652 |
| CASP7 | MAPK14   | 0.548 |
| CASP7 | EGFR     | 0.475 |
| CASP7 | HSP90AA1 | 0.407 |
| CASP7 | MAPK8    | 0.689 |
| CES1  | NR1I3    | 0.425 |
| CES1  | NR1H4    | 0.606 |
| CFD   | SPARC    | 0.925 |
| CFD   | FABP4    | 0.69  |
| CFD   | PPARG    | 0.597 |
| CFD   | PLG      | 0.907 |
| CTSB  | CTSD     | 0.97  |
| CTSB  | EGFR     | 0.43  |
| CTSB  | PLG      | 0.58  |
| CTSB  | PPARD    | 0.421 |
| CTSB  | GBA      | 0.682 |
| CTSB  | HSP90AA1 | 0.421 |
| CTSB  | MAPK8    | 0.4   |
| CTSB  | PLAU     | 0.721 |
| CTSB  | CTSS     | 0.868 |
| CTSD  | PLAU     | 0.488 |
| CTSD  | GBA      | 0.503 |
| CTSD  | HSPA8    | 0.523 |
| CTSD  | EGFR     | 0.526 |
| CTSD  | PLG      | 0.554 |
| CTSD  | LCN2     | 0.923 |

|         |          |       |
|---------|----------|-------|
| CTSD    | ESR1     | 0.959 |
| CTSD    | CTSS     | 0.959 |
| CYP19A1 | SULT2A1  | 0.669 |
| CYP19A1 | IGF1R    | 0.562 |
| CYP19A1 | EGFR     | 0.648 |
| CYP19A1 | PPARG    | 0.5   |
| CYP19A1 | HSD11B1  | 0.51  |
| CYP19A1 | SHBG     | 0.796 |
| CYP19A1 | ESR1     | 0.962 |
| DPP4    | FAP      | 0.436 |
| DPP4    | PPARG    | 0.51  |
| EGFR    | MAPK1    | 0.965 |
| EGFR    | SULT2A1  | 0.42  |
| EGFR    | MAPK14   | 0.81  |
| EGFR    | MMP13    | 0.601 |
| EGFR    | IGF1R    | 0.648 |
| EGFR    | F2       | 0.413 |
| EGFR    | TGFBR2   | 0.528 |
| EGFR    | PIK3CG   | 0.53  |
| EGFR    | PLG      | 0.567 |
| EGFR    | TGFBR1   | 0.588 |
| EGFR    | MAPK8    | 0.593 |
| EGFR    | GSTP1    | 0.634 |
| EGFR    | PPARG    | 0.787 |
| EGFR    | ESR1     | 0.943 |
| EGFR    | PLAU     | 0.951 |
| EGFR    | HSPA8    | 0.959 |
| EGFR    | PTPN1    | 0.988 |
| EGFR    | HSP90AA1 | 0.989 |
| ESR1    | MAPK1    | 0.971 |
| ESR1    | SULT2A1  | 0.521 |
| ESR1    | MAPK14   | 0.962 |
| ESR1    | IGF1R    | 0.989 |

|       |          |       |
|-------|----------|-------|
| ESR1  | PLG      | 0.451 |
| ESR1  | NQO1     | 0.4   |
| ESR1  | HSP90AA1 | 0.979 |
| ESR1  | MAPK10   | 0.852 |
| ESR1  | PTPN1    | 0.484 |
| ESR1  | PLAU     | 0.451 |
| ESR1  | SHBG     | 0.683 |
| ESR1  | MAPK8    | 0.908 |
| ESR1  | GSTP1    | 0.562 |
| ESR1  | NR1H4    | 0.501 |
| ESR1  | HSPA8    | 0.558 |
| F2    | MAPK1    | 0.931 |
| F2    | TTR      | 0.667 |
| F2    | MMP13    | 0.465 |
| F2    | SELP     | 0.832 |
| F2    | NR1H4    | 0.464 |
| F2    | PLG      | 0.473 |
| F2    | GC       | 0.616 |
| F2    | PLAU     | 0.952 |
| FABP4 | LCN2     | 0.451 |
| FABP4 | PPARD    | 0.456 |
| FABP4 | RXRA     | 0.945 |
| FABP4 | PPARG    | 0.991 |
| GBA   | HSP90AA1 | 0.493 |
| GC    | GSR      | 0.646 |
| GC    | TTR      | 0.88  |
| GC    | PLG      | 0.571 |
| GC    | NR1H4    | 0.697 |
| GSR   | MAPK1    | 0.47  |
| GSR   | MAPK8    | 0.432 |
| GSR   | HSP90AA1 | 0.475 |
| GSR   | NQO1     | 0.717 |
| GSR   | PRDX5    | 0.82  |

|          |         |       |
|----------|---------|-------|
| GSR      | GSTP1   | 0.82  |
| GSTP1    | MAPK1   | 0.485 |
| GSTP1    | NQO1    | 0.723 |
| GSTP1    | MAPK8   | 0.858 |
| HSD11B1  | SULT2A1 | 0.402 |
| HSD11B1  | PPARG   | 0.945 |
| HSD11B1  | NR3C2   | 0.721 |
| HSD11B1  | RXRA    | 0.905 |
| HSD17B11 | SULT2A1 | 0.417 |
| HSP90AA1 | MAPK1   | 0.979 |
| HSP90AA1 | MAPK14  | 0.589 |
| HSP90AA1 | IGF1R   | 0.67  |
| HSP90AA1 | PPARD   | 0.518 |
| HSP90AA1 | NQO1    | 0.478 |
| HSP90AA1 | NR1I3   | 0.52  |
| HSP90AA1 | TGFBR2  | 0.567 |
| HSP90AA1 | TGFBR1  | 0.612 |
| HSP90AA1 | MAPK8   | 0.834 |
| HSP90AA1 | NR3C2   | 0.967 |
| HSP90AA1 | HSPA8   | 0.999 |
| HSPA8    | MAPK1   | 0.425 |
| HSPA8    | NR3C2   | 0.919 |
| HSPA8    | MAPK10  | 0.641 |
| HSPA8    | MAPK8   | 0.767 |
| IGF1R    | MAPK1   | 0.934 |
| IGF1R    | MAPK14  | 0.504 |
| IGF1R    | TTR     | 0.592 |
| IGF1R    | PIK3CG  | 0.573 |
| IGF1R    | MAPK8   | 0.633 |
| IGF1R    | PTPN1   | 0.999 |
| LCN2     | PPARG   | 0.56  |
| MAPK1    | NQO1    | 0.4   |
| MAPK1    | PLAU    | 0.427 |

|        |         |       |
|--------|---------|-------|
| MAPK1  | PLG     | 0.464 |
| MAPK1  | PIK3CG  | 0.496 |
| MAPK1  | PPARG   | 0.672 |
| MAPK1  | MMP13   | 0.688 |
| MAPK1  | PTPN1   | 0.76  |
| MAPK1  | MAPK14  | 0.889 |
| MAPK1  | TTR     | 0.915 |
| MAPK1  | RXRA    | 0.941 |
| MAPK1  | MAPK8   | 0.947 |
| MAPK10 | MAPK14  | 0.91  |
| MAPK10 | MAPK8   | 0.903 |
| MAPK14 | PIK3CG  | 0.414 |
| MAPK14 | PLG     | 0.418 |
| MAPK14 | PPARG   | 0.588 |
| MAPK14 | MMP13   | 0.603 |
| MAPK14 | TGFBR1  | 0.631 |
| MAPK14 | PTPN1   | 0.652 |
| MAPK14 | MAPK8   | 0.943 |
| MAPK8  | NR1H2   | 0.412 |
| MAPK8  | MMP13   | 0.728 |
| MAPK8  | PPARG   | 0.82  |
| MAPK8  | PLG     | 0.487 |
| MAPK8  | NQO1    | 0.515 |
| MAPK8  | PTPN1   | 0.705 |
| MAPK8  | PLAU    | 0.632 |
| MAPK8  | TGFBR1  | 0.543 |
| MAPK8  | NR1H4   | 0.44  |
| MAPK8  | RXRA    | 0.923 |
| MMP13  | SPARC   | 0.444 |
| MMP13  | PLAU    | 0.454 |
| MMP13  | PLG     | 0.949 |
| NR1H2  | RXRA    | 0.985 |
| NR1H4  | SULT2A1 | 0.634 |



|        |         |       |
|--------|---------|-------|
| NR1H4  | RXRA    | 0.992 |
| NR1I3  | SULT2A1 | 0.726 |
| NR1I3  | RXRA    | 0.773 |
| PLAU   | PLG     | 0.951 |
| PLG    | SPARC   | 0.954 |
| PLG    | TTR     | 0.554 |
| PLG    | SELP    | 0.684 |
| PLG    | SHBG    | 0.42  |
| PPARD  | RXRA    | 0.955 |
| PPARG  | PTPN1   | 0.46  |
| PPARG  | RXRA    | 0.997 |
| RXRA   | SULT2A1 | 0.921 |
| SHBG   | SULT2A1 | 0.921 |
| TGFBR1 | TGFBR2  | 0.995 |
