# Supplementary material for: Action Mechanism Underlying Improvement Effect of Fuzi Lizhong Decoction on Nonalcoholic Fatty Liver Disease: A Study Based on Network Pharmacology and Molecular Docking
Source: Hindawi journal article supplement (doi:10.1155/2022/1670014), 2022-01-20
Supplement: f1 [file 1670014.f1.zip]

| Information of OMIM+Genecards+Disgenet |        |
|----------------------------------------|--------|
| Gene                                   | Source |
| AD7CNTP                                |        |
| IBD7                                   |        |
| PLEKHG5                                |        |
| DJ1                                    |        |
| KIF1B                                  |        |
| MTHFR                                  |        |
| MFN2                                   |        |
| GBD2                                   |        |
| PINK1                                  |        |
| ECE1                                   |        |
| ALPL                                   |        |
| RHCE                                   |        |
| FABP3                                  |        |
| YARS1                                  |        |
| GBD3                                   |        |
| ELOVL1                                 |        |
| FAAH                                   |        |
| FAAHP1                                 |        |
| PARK10                                 |        |
| PAOD1                                  |        |
| FOXD3                                  |        |
| DNAJC6                                 |        |
| IL23R                                  |        |
| TNNI3K                                 |        |
| ABCA4                                  |        |
| AGL                                    |        |
| DBT                                    |        |
| ATP1A1                                 |        |
| AD13                                   |        |
| NBLST6                                 |        |
| NOTCH2NLC                              |        |
| ECM1                                   |        |
| ZNF687                                 |        |
| SLC27A3                                |        |
| MUC1                                   |        |
| GBA                                    |        |
| PKLR                                   |        |

LMNA  
COPA  
MPZ  
FMO1  
FMO4  
AD14  
NCF2  
CELIAC7  
IBD23  
PARK16  
INAVA  
REN  
IL10  
RMD1  
TLR5  
PSEN2  
ARV1  
ADAM17  
NBAS  
APOB  
HADHA  
MPV17  
ABCG8  
PARK3  
HTRA2  
FABP1  
CELIAC8  
COPD  
ZAP70  
LCO  
CHDS2  
HOXD10  
PDE11A  
BMPR2  
CTLA4  
FARSB  
IRS1  
SP110  
GIGYF2

ATG16L1  
SAG  
AGXT  
PDCD1  
IBD9  
MYMY1  
CAV3  
CX3CR1  
CELIAC9  
HSCR6  
IBD12  
GBE1  
CHDS5  
POGLUT1  
SEC61A1  
RAB7  
AD15  
PARK21  
ATP2C1  
DZIP1L  
GYG1  
CELIAC10  
MME  
GNB4  
EIF4G1  
DNAJB11  
CELIAC11  
HTT  
HDL3  
PROM1  
UCHL1  
PHOX2B  
AIS4  
PKD2  
PPM1K  
SNCA  
ADH1C  
ELOVL6  
FABP2

CELIAC6  
FAT4  
HSCR9  
TRIM2  
FAT1  
GDNF  
IBD18  
ELOVL7  
HEXB  
PDE8B  
APC  
AITD2  
CELIAC2  
IBD5  
PDB4  
LEAP2  
SAR1B  
HARS1  
LARS1  
SH3TC2  
IRGM  
FAT2  
FABP6  
SQSTM1  
HULC  
ELOVL2  
HFE  
IBD3  
VAMAS6  
DHX16  
HLA-B  
HLA-DQA1  
HLA-DQB1  
HLA-DPB1  
AD17  
FCYT  
ELOVL5  
AITD1  
SLC17A5

COX7A2  
ELOVL4  
BCKDHB  
SEC63  
FIG4  
FABP7  
ARG1  
ENPP1  
CELIAC12  
LPA  
PRKN  
TBP  
IL6  
HNRPA2B1  
GARS1  
SFRP4  
PGAM2  
EGFR  
CHCHD2  
NCF1  
HSPB1  
CD36  
ABCB4  
ABCB1  
PON1  
PON2  
IBD11  
ARPC1B  
RINT1  
IRF5  
AD10  
NOS3  
PRKAG2  
AIS2  
GATA4  
CHDS9  
NEFL  
AD12  
CMT2H

JPH1  
GDAP1  
FABP5  
PMP2  
FABP4  
FABP12  
CDH17  
YARS  
WPWS  
VMLDS2  
VAMAS5  
VAMAS3  
URBWD  
TIL3  
TACE  
SSC2  
SSC1  
SRK  
SPDA1  
SPAT  
SLEB2  
SIASD  
SEC61  
SCA17  
RTD  
RP47  
RHNA  
PUM  
PROML1  
PPNAD3  
PPH1  
PP2CM  
PON  
PKHD1  
PK1  
PGY3  
PGY1  
PGAMM  
PDNP1

PDE11A1  
PCLD2  
PARK7  
PARK6  
PARK5  
PARK22  
PARK2  
PAFABP  
P62  
OMI  
NISBD2  
NIID  
NBPHOX  
NAG  
NACP  
MYMY  
MTPA  
MTDPS6  
MEGF1  
LRG47  
LQT9  
LMN1  
LCE  
LARS  
KIAA1985  
KIAA1441  
KIAA0720  
KIAA0642  
KIAA0517  
KIAA0274  
KIAA0214  
JP1  
ILLBP  
ILFS3  
IFNB2  
IFI41  
IDDM12  
IBMPFD2  
IBD17

OMIM

IBD14  
HSP27  
HSCR3  
HOX4D  
HOPS  
HLN2  
HLA-H  
HELO1  
HEDJ  
HD  
HARS  
GSD4  
GSD15  
GS  
GPR13  
GDE  
GBD4  
GARS  
FRPHE  
FLDB  
FATP3  
FAT  
FARSLB  
FABPB  
FAAHOUT  
EIF4G  
E1B  
DZIP2  
DJC6  
DEE38  
DDX16  
CSIF  
CMTD1F  
CMT4A  
CMT2E  
CMT2DD  
CMT2B  
CMT2A  
CMT1G



CMT1B  
CMRD  
CLP46  
CHDS7  
CGD1  
CELIAC1  
CDH16  
CD10  
CCDD  
C1orf106  
BCPM  
BCATE2  
ASD2  
ARC41  
APG16L  
AIS5  
AIS1  
AILJK  
ADMD  
ADH3  
AD4  
ABCR  
AAOPD  
AC133  
ADMIO2  
ADSD  
ADTKD2  
ADTKD4  
ADTKD5  
APBD  
ARPKD  
BDPLT10  
BLBP  
BSF2  
CALLA  
CELIAC3  
CMH6  
CMT1F  
CMT2A1

CMT2A2A  
CMT2EE  
CMT2F  
CMT2K  
CMT2R  
CMTDIC  
CMTDID  
DBP2  
DJ9  
DSMA4  
EFABP  
EMD2  
ESA  
ETM6  
FACE  
FPC  
GSD10  
GVHDS  
HDL4  
HFE1  
HHD  
HKLLS2  
HOMGSMR2  
HPT1  
IBD10  
IBD29  
IFI1  
IFI75  
IKSHD  
IMD71  
IT15  
KIAA0473  
KTELC1  
LDLCQ4  
LFIS  
LINC00505  
MDR1  
MDR3  
MNMN

MPDT  
NISBD1  
NPPS  
PARK1  
PARK11  
PARK13  
PARK18  
PDB3  
PDB6  
PDE11A2  
PDJ  
PKD5  
PMX2B  
POVD1  
PSN  
PTMP  
PYL  
RILDBC1  
SAC3  
SARA2  
SCA38  
SCA45  
SLD  
SLEB1  
SLEB10  
SMAD1  
SOPH  
SPG79  
STGD1  
STGD2  
STM2  
STSL1  
TNSALP  
USH3B  
V28  
VAMAS2  
VSD1  
ABBP2  
ALPS5

ALS11  
ANDD  
BTPS2  
CMD1V  
CMT2D  
CMT2W  
CMTDIG  
CMTRIA  
CMTRIC  
DSS  
FCHL2  
FFM  
FPLD2  
FTDAL3  
HMN2B  
HMSN6A  
HSF  
IBD13  
IBD19  
ICP3  
ILFS1  
ILFS2  
IMD48  
LOMARS  
M6S1  
MELIOS  
MSUDMV  
MVCD5  
MVCD7  
NBLST1  
NBLST2  
NDGOA  
NEP  
PARK19  
PARK4  
PDE11A3  
PKD4  
PRP8  
PRSS25

RMD2  
RP41  
RUMI  
STGD3  
TACHD  
TYRRS  
VODI  
YVS  
YTS  
TOF  
TFQTL2  
RP19  
PPNAD2  
PKD6  
PCA1  
NMOAS  
NADGP  
MGCA8  
ISQMR  
HMN5A  
HGF  
DESMD  
CORD12  
CMT2T  
CMT2A2B  
CMD1A  
CLCs  
CHN2  
CCHS  
C3orf9  
ARHR2  
BTOP  
CD133  
CORD3  
DDD4  
DMRV  
HGPS  
SCA34  
SCA43

SMAJI  
YRS  
ARMD2  
COLED  
LGMDR21  
MCDR2  
STGD4  
TNF  
IL6  
INS  
PNPLA3  
PPARG  
IL1B  
GGT1  
TLR4  
HFE  
IL10  
LEP  
FAS  
TGFB1  
NR1H4  
AKT1  
SLC17A5  
APOB  
APOE  
TP53  
HADHA  
MIR21  
ALB  
CAT  
IRS1  
APOA1  
MTTP  
RETN  
INSR  
LEPR  
MIR122  
MLXIPL  
SERPINE1

RBP4  
UCP2  
DDIT3  
LPL  
NR1H3  
GPT  
MIR155  
ABCB11  
CCL2  
PPARGC1A  
ADIPOQ  
IGF1  
HMOX1  
PPARA  
IRS2  
TLR2  
CD36  
CRP  
HNF4A  
AHSG  
PTEN  
MTOR  
MIR34A  
CXCL8  
MIR17  
ACACA  
HGF  
CYP2E1  
F2  
MIR126  
APOC3  
SOD2  
SOCS3  
MIR140  
CPT2  
IKBKB  
MIR132  
IFNG  
KRT18

FASN  
MIR22  
MIR30A  
EIF2AK3  
SLC2A4  
CASP3  
SREBF1  
MIR31  
AFP  
MIR192  
MIR27A  
IL1A  
CEBPA  
MAPK8  
FABP1  
SIRT1  
MIR29C  
VEGFA  
MIR200B  
MIR10B  
MIR200A  
MIRLET7D  
MIR33A  
CCN2  
MIR200C  
CTNNB1  
SMPD1  
MIR183  
CTLA4  
SERPINA1  
LMNA  
STAT3  
MIR130A  
FABP4  
ACE  
PIK3CA  
MFN2  
RELA  
ATP7B



MIRLET7E  
GHRL  
MIR107  
MIR26A1  
ABCA1  
NAFLD1  
MIR203A  
MTHFR  
FASLG  
TM6SF2  
MSR1  
EGFR  
MIR16-1  
MARS1  
XBP1  
MIR125A  
MMP9  
ICAM1  
SOD1  
CFTR  
MIRLET7C  
LIPA  
TNFRSF1A  
APP  
ACOX1  
CPT1A  
MIR451A  
NDUFS1  
ABCB4  
ADIPOR1  
CAV1  
TIMP1  
MIR30D  
IL18  
ADIPOR2  
MIR378A  
STAT1  
JUN  
MIR483

CASP8  
CP  
LCAT  
MAP3K5  
CDKN2A  
MMP2  
MT-TK  
ATF4  
CYCS  
HMGCR  
TTR  
NOTCH1  
TF  
MPO  
MYC  
FGF21  
LDLR  
TERT  
SREBF2  
NAFLD2  
PON1  
IL1RN  
NFKB1  
EGF  
VWF  
SMAD4  
JAG1  
SQSTM1  
MIR429  
SLC25A13  
PIK3R1  
ESR1  
CCND1  
NOS2  
BSCL2  
AKT2  
CETP  
VCP  
GANAB

G6PC  
SPP1  
SERPINC1  
GCG  
BAX  
HAMP  
ABCC2  
HLA-DQB1  
BDNF  
VIM  
CYP3A4  
PTPN11  
GCKR  
ELANE  
DPP4  
MMP1  
CDKN1A  
NDUFS4  
CXCL10  
HSPB1  
MT-CO1  
PCSK9  
POMC  
MIR199A1  
MIR181B1  
LIPC  
PRMT7  
PRKAG2  
CXCR4  
TNFRSF1B  
SLC2A1  
NOD2  
THBD  
NAMPT  
NLRP3  
BMP6  
PNPLA2  
MT-CYB  
PDGFRB

SDHB  
IGF1R  
NGF  
CRYAA  
ACTB  
PKLR  
HSPD1  
SCD  
BCL2  
PTGS2  
TLR9  
SERPINA3  
ERN1  
C3  
TLR1  
SDHD  
TGFB2  
DRD2  
TLR6  
NDUFS3  
CFH  
SLC6A3  
TNFSF11  
ENPP1  
MIR146A  
LIPE  
UGT1A1  
FGF19  
NDUFS2  
AGPAT2  
MDM2  
CCL3  
ABCB7  
DNMT1  
NDUFB8  
DNAJB11  
SDHC  
CDK4  
FLT1

ASS1  
LPA  
SLC6A4  
SDHA  
FN1  
IFNA1  
PRKAB1  
PRKAA1  
NDUFV1  
NDUFS7  
CTSD  
CDKN3  
APOA5  
IL17A  
TARDBP  
CYP7A1  
GRN  
AKT3  
CASR  
PLAU  
GCK  
KRT8  
ANO5  
TGFB1  
EZH2  
IFIH1  
MT-CO2  
PC  
XDH  
ALMS1  
MYD88  
GSR  
FABP2  
NDUFV2  
MIR195  
GH1  
MIR151A  
CHUK  
HBB

SMARCA4  
CYP1A1  
SIRT3  
CCL4  
FOS  
NDUFA13  
MEG3  
MIR20A  
FGF23  
EP300  
PIK3R2  
NDUFA9  
NDUFB9  
MIR181A1  
NDUFA6  
VDR  
LOX  
CTSB  
GSK3B  
AKR1D1  
IDH1  
NR1H2  
MIR144  
F3  
MIR222  
RAC1  
GARS1  
COX5A  
MIR221  
APOA2  
NDUFA2  
MT-ND6  
CDH2  
HTR2A  
PLIN1  
CRAT  
MT-CO3  
PIK3CD  
TNFAIP3

EIF2S1  
NDUFS8  
MIR214  
CPOX  
MIR27B  
CDC42  
SLC40A1  
GSTM1  
CYP1A2  
GSTP1  
HIF1A  
SPINK1  
CCL5  
SUMF1  
NDUFA1  
AGTR1  
CHI3L1  
CYBB  
NDUFB11  
SMAD7  
NDUFS6  
COX6B1  
BGLAP  
CHIT1  
NFE2L2  
MIR182  
DGAT1  
KRT7  
ELOVL6  
SERPINA6  
TFR2  
CRH  
RXRA  
BMPRI1A  
ERBB4  
ALPP  
TNFRSF11B  
CYP17A1  
PLA2G4A

NDUFB3  
VCAM1  
LRP6  
SERPINF2  
ETS1  
HSD11B1  
FGFR4  
LCN2  
ADH1C  
ALPL  
SHBG  
MYF5  
DSP  
CA2  
FABP3  
KRT19  
CD55  
IFNA2  
MIR15B  
SELE  
CNR1  
MAPK10  
HP  
ERCC2  
HUWE1  
MAPK14  
AGT  
NDUFA10  
UQCRC2  
NDUFA12  
CD44  
IRF1  
WNT3A  
GLUD1  
ALDH2  
SELP  
MIR154  
HJV  
SMAD3



PEMT  
IL6R  
TNFSF10  
ADH1B  
MT-ND3  
CYP1B1  
NPPB  
MIR23B  
AIFM1  
MYH9  
SLC27A1  
CYC1  
LNCARSR  
FADS2  
DRD3  
SCARB1  
CEL  
UCP1  
MMP13  
ADA2  
NR1I2  
LIVAR  
LRPPRC  
HNRNPA1  
PRKAA2  
CPS1  
TIMP2  
PRSS1  
CYBA  
IGFBP3  
MIR95  
CYP2A6  
ADRB3  
MIR187  
NDUFA11  
FLI1  
SHH  
HSP90AA1  
PRL

PARP1  
UQCRR  
COX8A  
FGA  
HBA1  
SLC27A2  
IL15  
LITAF  
CSF1  
IL1R1  
GC  
STAR  
NPY  
CES1  
COX4I1  
AHR  
FABP12  
IFNL3  
CLU  
DDX3X  
DKK1  
SLC10A1  
CXCR3  
CASP7  
S100A9  
CASP9  
MIR29A  
TET2  
RARS1  
BIRC5  
HSPG2  
XRCC4  
CLCN2  
PPIG  
SP1  
GHR  
DNASE1  
IGFBP1  
GFER

TMPRSS6  
ADRB2  
FTL  
DGAT2  
HSPA5  
SPARC  
GAL  
NR0B2  
EPRS1  
IL21  
KL  
PTPN1  
MIR29B1  
MAOA  
FGB  
CCK  
GDF15  
DRD1  
DNMT3A  
MIR149  
EIF2AK4  
GPX1  
PIK3CB  
MIR33B  
ITCH  
MST1  
NQO1  
HMGB1  
COL3A1  
LTBP3  
PPARD  
TPM2  
PIK3R3  
THBS1  
AKR1A1  
MIR9-1  
APPL1  
RARRES2  
SDCCAG8

AGER  
TMPO  
EPAS1  
IRF8  
NR5A2  
SLC25A22  
CD163  
SHC1  
UQCRB  
EIF4G1  
SI  
RPS6KB1  
PLAUR  
PALLD  
TPM1  
COX6A1  
USF1  
PEPD  
CD59  
CLRN1  
ABCG1  
NAT2  
P4HB  
GOLM1  
MAPK9  
LEPQTL1  
CFLAR  
NPC1L1  
LGALS3  
CD14  
IL17RA  
NDUFAB1  
AREG  
FDFT1  
DPM1  
NEAT1  
TPM3  
GABRG2  
DICER1

PLIN2  
NLRC4  
MERTK  
KEAP1  
ATP5F1E  
FOXF1  
RPS27A  
DHCR24  
BIRC3  
ATF6  
SLC25A12  
SLC25A17  
HDAC1  
UCP3  
FOXC2  
GSTT1  
PLTP  
OGG1  
ALAD  
GABRA2  
SULT2A1  
DYSF  
KLF6  
POSTN  
IL1RAPL2  
SDC1  
SOST  
PHB  
TSPO  
IRF3  
E2F1  
IFNAR1  
PRKCQ  
MIR224  
EPHX1  
COX4I2  
NR1I3  
MIR423  
COL1A1

TFEB  
GOT2  
MLN  
CD68  
IL33  
RPS6KA3  
LPIN1  
SFRP4  
UQCRFS1  
SERPINA7  
TRAF3IP2  
AXL  
ANXA2  
CCR1  
RPL5  
GGT2  
BID  
IL18BP  
NTS  
ACACB  
GPC4  
MAP3K11  
SLC39A14  
CYP2B6  
CCL20  
SLC39A4  
NDUFB10  
FTO  
TYSND1  
GFPT1  
CXCR5  
ANGPTL8  
CYP4A11  
IARS1  
ABCC3  
EIF2AK2  
DNAH11  
COX7B  
BCL2L11

SAMM50  
ATP2A2  
PARVB  
PHGDH  
DARS1  
EGR1  
ENPP2  
UFM1  
GLP1R  
NDUFA4  
TGM2  
IL6ST  
TBP  
TRIB1  
COL12A1  
CNR2  
CANX  
MYH14  
LOXL2  
AOC3  
SAR1A  
ASCL1  
ACSM2B  
RPS17  
DRD4  
CEBPB  
PTX3  
OPRM1  
OLR1  
DCLK1  
DBH  
POR  
GSK3A  
HDAC9  
OGT  
EPHX2  
STING1  
IGF2BP2  
SERPINB3

NCAN  
FFAR4  
SPTAN1  
MATN3  
SRD5A2  
ITGA8  
RPS3A  
SLC25A1  
PTPRD  
ALDH9A1  
PDXK  
TXNRD2  
MATR3  
TXN  
SLC1A3  
IL16  
SF3B1  
TRAF2  
CPB2  
ATP1A1  
TKT  
MBOAT7  
COL13A1  
GCLC  
PDGFA  
SCAP  
PKM  
KHK  
RUNX3  
ERLIN1  
IMMT  
A2M  
ERLIN2  
FST  
ALOX12  
RB1CC1  
IRGM  
CYP4F2  
UBD



CASP2  
MIR331  
SIK1  
COX6A2  
FGL1  
ITPR2  
UGT1A6  
HSPA1A  
PTPRG  
PRKAG1  
LBP  
VTN  
RDH5  
PIN1  
P2RX7  
XRCC5  
TRIM21  
CXCL11  
CCL19  
MIR24-1  
PRKAB2  
UGT1A9  
DMGDH  
UGT1A7  
GPNMB  
CCR2  
SNTA1  
JAZF1  
H4-16  
CYP4F3  
CD82  
CUL3  
ACSL3  
TNFRSF4  
CDH4  
LECT2  
MIR30C1  
UGT1A8  
PRPF8

MLX  
ZNF365  
FNDC5  
NDUFA5  
FYN  
CYLD  
HYOU1  
EEA1  
NOX4  
FOXA1  
NDUFS5  
SERPINF1  
PRDX1  
EFTUD2  
YEATS2  
LPCAT3  
COX7A2  
CCT5  
CLDN2  
AFAP1-AS1  
NNMT  
YWHAE  
COX6C  
COPA  
TRAPPC9  
COMMD1  
NDUFA8  
HNRNPK  
SERPINA12  
GOT1  
DISC1  
NAT1  
TRAF1  
XRCC6  
PPP2CA  
CES2  
NDUFC2  
NDUFB6  
UQCR11

Genecards

CYP2J2  
UQCRC1  
TNC  
CARS1  
TRAP1  
RTN4  
PRSS2  
UGT1A4  
PDK4  
YY1  
JCAD  
SIRT6  
PLIN5  
SNRNP200  
MGAM  
CDH5  
YBX1  
TP53BP1  
NCOA3  
RPL10  
UGT1A3  
STUB1  
SOD3  
UBE2D2  
ROCK1  
CACNA2D1  
SLC34A2  
AKR1B10  
H4C11  
LGALS3BP  
H4C1  
SERPINH1  
SLC25A11  
IFNL4  
IL36A  
ACE2  
TXNRD1  
HPS1  
KHDRBS3

CFD  
ITLN1  
AMPH  
AZGP1  
POMP  
SLC38A8  
MMP11  
H4C8  
PEG10  
H4C13  
H4C9  
NDUFA3  
PRKCE  
COX8C  
H4C15  
GSS  
NDUFB7  
LCN1  
H4C4  
H4C14  
H4C12  
IL18RAP  
H4C3  
PRKAG3  
DROSHA  
H4C6  
H4C2  
H4C5  
HS3ST1  
RPL6  
UGT1A10  
PCLO  
NDUFB4  
NDUFB5  
CYP8B1  
LCP1  
SIPA1L2  
PPP3CA  
LOC110806262

SIRT4  
APLN  
HIGD1A  
MAP3K7  
NDUFB2  
PDGFC  
RORA  
TPM4  
COX5B  
PRKDC  
SLC4A4  
NDUFC1  
NDUFA7  
TFAP2B  
UQCR10  
UQCRH  
NDUFB1  
MIR363  
NDUFV3  
NFIC  
PZP  
CFL1  
YIPF1  
COX7A1  
HNRNPU  
PUF60  
CXCL16  
AQP9  
HSPA6  
SIRT5  
COX7C  
ARRDC3  
PTPRU  
COX7A2L  
LEMD2  
HTR1B  
AHNAK  
CLTC  
SLC9A9

ALPI  
NDUFA4L2  
HSD17B13  
HDAC8  
RIPK3  
STEAP4  
EEF1A1  
MACROD2  
SEMA5A  
ADH5  
MAPK12  
CMKLR1  
IL34  
ADH1A  
CCAR2  
CCT4  
ESM1  
PNPLA7  
ELK1  
EHBP1L1  
LINC01016  
KAT5  
PSMC2  
GRK2  
RPL3  
CD5L  
TNFRSF12A  
COX7B2  
CRACR2A  
RPS15  
COX6B2  
NOS1AP  
SLC25A47  
PRDX5  
ATF3  
TRAF3  
USP7  
NGF-AS1  
NDUFC2-KCTD14

MIR103A2  
BIRC2  
IL1R2  
FARP1  
GPN1  
NRG3  
CISD2  
PCSK5  
UQCRHL  
MIR361  
SDC2  
EGFL6  
SLC25A3  
INHBA  
FAM166B  
ESRRG  
DDX60L  
AQP7  
HNMT  
ADAMTS9  
DGCR8  
RPTOR  
IGHG1  
CAPSL  
EDA  
MAP3K8  
MIR103A1  
TAGLN  
STX17  
TSHB  
PSMD2  
TP53BP2  
UGDH  
LAPTM4A  
NMT2  
SOCS2  
PLPPR4  
CX3CL1  
AGAP1

RPL7  
MOGAT2  
YWHAG  
GPLD1  
CCRL2  
CTBP2  
UGT1A5  
ARNT  
CDK8  
RPN1  
GLO1  
ST8SIA1  
CREB5  
YBX3  
FAF2  
MLXIP  
AQP3  
CYGB  
YWHAQ  
SLC46A3  
FRK  
CCN4  
FAP  
OSBPL5  
TLCD4-RWDD3  
SVIL  
AATF  
ANKK1  
CWF19L1  
CYP2A13  
HCFC1  
MIR873  
CYP2F1  
CALD1  
HSP90AB1  
ZFP90  
MYO6  
ZNF512  
PDIA2



FETUB  
BCAT1  
ADRB1  
PCNX3  
SLC3A2  
TNR  
AEBP1  
UBQLN4  
SEL1L3  
TTF2  
FO XK1  
ZP4  
C2orf16  
TEX36  
PPIB  
RPL7A  
SORCS3  
SORCS2  
ARL2BPP6  
ATAD3A  
CAD  
SLC30A6  
ADAMTS9-AS2  
NDRG2  
VIL1  
DDX1  
NUCB2  
CHST2  
GPT2  
MCM7  
NFE2  
MIR6090  
APOF  
CCNC  
MYO1B  
PCBP1  
FAM171A1  
PTBP1  
LOC643339

RPL12  
NFE2L1  
BBC3  
MYH10  
FAM107B  
HSPH1  
IAH1  
SFRP5  
RPL9  
TRIB3  
COLGALT1  
RNU6-53P  
MIR372  
RND3  
ARPC1B  
NCL  
KCNK7  
MACROH2A2  
PCBP2  
DDX5  
TMBIM1  
HNRNPM  
DISC2  
SDK1  
SLC9A4  
ATXN2L  
PPP1CA  
PFKFB3  
POLR3H  
ETS1-AS1  
RPL27  
APPL2  
L13304-005  
KLHL6  
PSG1  
NRG4  
GRM4  
RPL30  
SMIM20

HNRNPC  
MYO18A  
SENP3  
CTSS  
KRTAP5-5  
CNOT4  
KIF16B  
RPS4X  
FOXN3  
SERPINA4  
AGR3  
GGT3P  
MYL6B  
POLR2D  
WWTR1  
PDE7B  
DDX60  
DDX50  
SLC6A9  
piR-37045  
lnc-PNPLA5-2  
APLNR  
RUVBL2  
C1QTNF3  
AP2B1  
ENSG00000253111  
LINC02694  
MCM3  
GCN1  
MRTFA  
SIRT7  
YWHAB  
TUBA1C  
ONECUT2  
GATAD2A  
SRSF6  
PWWP3A  
MCM5  
WSPAR

ATP5F1B  
RPL13  
CLRN1-AS1  
GSDMD  
CCT3  
H1-4  
MCF2L2  
RPS2  
TMOD3  
RPLP2  
MYO1C  
SNHG18  
NUDT4  
IGF2BP1  
ACTR5  
YWHAZ  
TSNAX-DISC1  
CCT2  
SLC25A10  
RPS15A  
lnc-PUM2-3  
lnc-RHOB-11  
RPS23  
CILP2  
LINC01679  
RPS11  
RESF1  
C16orf95  
IP6K3  
MIR1296  
XPO4  
ENSG00000287092  
LINC00917  
LINC00322  
RPL10A  
DNAJA1  
SAT1  
ZNF101  
QARS1

TCP1  
SLC30A9  
GRIK3  
SP4  
ENSG00000254595  
lnc-CRYAA-1  
lnc-JCAD-2  
lnc-CRYAA-17  
ENSG00000226026  
RPL4  
NUDT21  
MYO1D  
STRA8  
MIR646HG  
ENSG00000231487  
PLPP7  
A2MP1  
EIF3L  
RNU6-961P  
ARHGAP8  
IL36B  
HNRNPF  
SRSF1  
LOC389199  
RAB37  
TRMT44  
RPS9  
ENSG00000255046  
ENSG00000287292  
ENSG00000222042  
lnc-LTBP3-4  
OTX2P1  
ENSG00000237936  
MN309375  
BECN2  
INSIG2  
RPL8  
GSTK1  
RPS18

TLL1  
ENSG00000234385  
ENSG00000249631  
lnc-FLI1-5  
ZNF267  
GOS2  
MIR1183  
HNRNPH1  
MIR449A  
C1QTNF1  
LRRFIP2  
ANXA9  
CRTC1  
SVIL-AS1  
SNRPD2  
SLC9A9-AS1  
TEX36-AS1  
LOC100130331  
SLC9A9-AS2  
ENSG00000257322  
RNU6-908P  
ENSG00000236501  
ENSG00000250541  
ENSG00000265994  
ENSG00000207171  
ENSG00000235464  
RNU1-35P  
EEF1A1P20  
ENSG00000236385  
ENSG00000287032  
ENSG00000284676  
lnc-DDX60L-3  
ENSG00000226973  
ENSG00000199378  
lnc-KCNK7-1  
HSALNG0076986  
ENSG00000276627  
piR-41195-080  
lnc-UBE2N-9

lnc-EDRF1-4  
piR-59297-626  
LOC105372698  
piR-38051-198  
HSALNG0076987  
LOC107986198  
LOC102723733  
ENSG00000270927  
piR-57133-376  
AB372775  
RF00994-591  
piR-31109-001  
RF00017-1202  
lnc-AIFM2-3  
ENSG00000283174  
ENSG00000213117  
ENSG00000254935  
RPL24  
RNU6-976P  
ENSG00000283991  
lnc-TRIB1-7  
LOC105375131  
ENSG00000268473  
STMP1  
DHX9  
PSME2  
RBFOX1  
THNSL2  
LINC00355  
AP2A2  
TUBA8  
LOC101929710  
INPP4B  
PABPC1  
POT1-AS1  
ST13P12  
NLRP2  
LINC02789  
LINC01090

PSAPL1  
ENSG00000237596  
ENSG00000250001  
LOC105373944  
ENSG00000248537  
HNRNPA1P58  
LOC101060035  
SLC23A2  
ACTR2  
FECHP1  
EIF4A3  
LOC101928135  
KRT8P18  
ACTR3  
PRR5-ARHGAP8  
PHF21B  
ENSG00000274121  
ENSG00000286071  
ATP6AP1L  
SLC23A1  
SRSF7  
STARP1  
LINC00888  
PBX2P1  
SERPINB4  
HNRNPA3  
USP4  
TET1  
TPI1P1  
LOC401864  
SLC23A4P  
MIR378C  
MIR4772  
AP2A1  
CPB2-AS1  
HDHD5-AS1  
LINC01029  
SNORA63E  
LINC02392



LINC02534  
ENSG00000243273  
SNORA63D  
LINC01818  
ENSG00000260234  
ENSG00000259053  
ENSG00000251152  
RNU6-655P  
RNU6-161P  
ENSG00000241675  
RPL35AP33  
ENSG00000232735  
ENSG00000234481  
ENSG0000025204C  
ENSG00000253092  
ENSG00000249664  
LGMNP1  
ENSG00000253354  
ENSG00000272475  
LINC02822  
HNRNPA3P5  
RNU6-1172P  
MRPL45P1  
ENSG00000197462  
ENSG00000235503  
ENSG00000234034  
LOC107987158  
ENSG0000025173C  
ENSG00000254171  
RPL23AP20  
ENSG0000025908C  
lnc-SLC46A3-1  
ENSG00000288092  
lnc-TSNAX-2  
SDR42E1P5  
lnc-MRGPRG-1  
ENSG00000233983  
MN309223  
ENSG00000271682

ENSG00000287720  
lnc-SLC22A18-7  
lnc-RASGRP1-1  
lnc-WDR91-4  
piR-50443-100  
ENSG00000229115  
ENSG00000225906  
HSALNG0113292  
piR-61101-044  
ENSG00000231984  
piR-61861-018  
hsa-miR-5096-076  
ENSG00000275383  
piR-48470  
RF00026-283  
piR-40638  
piR-40663  
piR-49272  
piR-48794  
piR-48799-012  
piR-49129  
piR-39926  
piR-39858-368  
piR-56788  
piR-56842  
piR-32810-118  
piR-33024  
piR-32825  
piR-32961  
ENSG00000285525  
piR-48131  
piR-39137  
piR-32153  
piR-49710  
piR-59496  
piR-43106-189  
piR-34682  
piR-42506  
piR-42270

lnc-TRIB1-8  
HSALNG0031159  
HSALNG0032693  
piR-43926-003  
piR-44231  
piR-59890  
piR-35359  
piR-36491  
lnc-XRCC4-4  
piR-54702  
LOC105373170  
piR-45773  
piR-55199  
piR-46362  
NONHSAG018421.1  
lnc-KLHL24-6  
piR-44286  
piR-37903  
piR-37780  
piR-45939  
LOC105373943  
piR-61711  
NONHSAG013110.1  
LOC105379051  
RF00017-1416  
LOC107986000  
ENSG00000258506  
piR-30178  
piR-55631  
piR-30153  
piR-47596  
piR-30883  
HSALNG0014027  
piR-36047  
piR-55036-040  
piR-46640  
ENSG00000276067  
ENSG00000271078  
piR-31534-137

ENSG00000279912  
ENSG00000280306  
ENSG00000219736  
ENSG00000220748  
LOC102724253  
LOC107984123  
LOC105377705  
RPL23A  
RUVBL1  
IBTK  
AUP1  
ILF3  
ARPC2  
RRBP1  
RTRAF  
EIF4A1  
SRSF4  
SUGP1  
LOC110366354  
ENHO  
AHSA1  
RNF114  
CTPS1  
SEC16A  
RPS8  
TRIM33  
TMSB4X  
SRRM1  
DUSP26  
EIF3E  
DDX17  
CCT8  
CAMKK2  
EDC4  
EIF3B  
HKDC1  
CKAP4  
HNRNPUL1  
MAPK13

EIF3F  
RBM14  
UBE2D3  
FARSA  
HSD17B11  
PDIA4  
PGAM5  
FAM3A  
SLC25A48  
PKNOX1  
TMEM97  
PABPC4  
SF3B3  
C1QTNF9  
MIR190B  
CAND1  
MYBBP1A  
USP48  
TMC4  
TXNL1  
HNRNPL  
DEFA1  
EIF4A2  
LAMP3  
DHX15  
SUB1  
TMBIM6  
ILF2  
SRRM2  
FAM3B  
RTCB  
OPRD1  
GLT8D2  
EBNA1BP2  
LATS2  
GGT5  
HMCES  
SMOC2  
PHF2

SNRNP40  
FAT1  
DDX46  
PHF5A  
KDM4B  
ARPC4  
NMBR  
UBXN1  
SLC2A8  
RGS4  
FAIM  
USP10  
CLGN  
LYPLAL1  
SH3BP5  
STK24  
IGHG4  
DUSP14  
SEC16B  
DNAJC10  
RANGAP1  
H2BC18  
HSP90AA2P  
COP1  
H2BC11  
RAB32  
PNLIPRP2  
RAMP3  
TRIM47  
TRPC4AP  
ZNF300  
SDF2L1  
BMP8B  
FNDC3B  
DNAJC11  
FUNDG2  
HIF3A  
IGKV2D-23  
RUBCNL

LOC109279247  
LINC01684  
TXNDC5  
RPL17-C18orf32  
PHLPP2  
MIR103B2  
MIR103B1  
SAP18  
MAS1  
CTDNEP1  
YIPF6  
CARD6  
SUCNR1  
PRMT3  
HERC4  
CR1L  
FAM174A  
MIR4668  
TM6SF1  
TM6SF2  
PNPLA3  
CYP2E1  
SIRT1  
FGF21  
LEP  
NFE2L2  
PPARA  
ADIPOQ  
NR1H4  
PPARD  
SREBF1  
LDLR  
XBP1  
CAT  
FAS  
GNMT  
PEMT  
CPT1A  
NR5A2

TGFB1  
AHR  
GSTM1  
GSTP1  
IL1A  
JAK2  
PRKCA  
ABCC2  
KLB  
ACE  
ALDH2  
GSTT1  
PTEN  
CD14  
NQO1  
FOLR2  
GSTA1  
IL4  
LIF  
PDK4  
PRKCD  
PRKCE  
VLDLR  
ADH1A  
ADH1B  
ADH4  
CSF2  
CYP1A2  
CYP17A1  
AHCY  
F2  
ALDH1A1  
ALDH1B1  
B3GAT1  
EIF2AK1  
LAMA1  
IL3  
MMP1  
SERPINB2



ABCB4  
PRF1  
PRKACA  
TRIB3  
RAG2  
RDX  
TNFRSF1B  
IKBKKG  
STC2  
ALDH4A1  
SCARB1  
GCKR  
ATP5F1B  
NCAN  
PARVB  
SAMM50  
FDFT1  
PTPRD  
ZGLP1  
PPARGC1A  
NLRP3  
OSBP1L5  
COL13A1  
CRP  
DPP4  
ERBB4  
FBL  
ALB  
EHBP1L1  
GCG  
SLC17A5  
GGT1  
GLP1R  
GPT  
HFE  
APOC3  
IGF1  
IL1B  
IL6

KRT18  
LEPR  
LIPA  
MIR122  
MIR21  
MIR34A  
MTTP  
PIK3CA  
PIK3CB  
PIK3CD  
PIK3CG  
PPARG  
GATAD2A  
PRKAA1  
PRKAA2  
PRKAB1  
RBP4  
SCD  
SHBG  
SLC5A2  
GGTLC5P  
SP4  
SREBF2  
TLR4  
TNF  
GGTLC3  
GGT2  
GGTLC4P  
CNBP  
MBOAT7  
EHMT1  
ACTR5  
ZNF512  
CRACR2A  
PLPP7  
PWWP3A  
TP63  
DDX60L  
XPR1

CD36  
CREB5  
FGF19  
AHSG  
FASN  
GABPA  
GH1  
LBP  
LGALS3BP  
HAMP  
REN  
NR1H3  
CYP3A4  
FABP1  
SIRT3  
HNF4A  
HSD17B13  
IL17A  
MLXIPL  
CCL2  
LOC102724197  
AGTR1  
MTOR  
FETUB  
APOE  
PON1  
RETN  
RARRES2  
UCP2  
NR0B2  
GGTLC1  
DECR1  
PCSK9  
ACACA  
HMGB1  
APOB  
IL10  
LPL  
MIR192

MTHFR  
SERPINE1  
ANGPTL8  
SOD1  
TP53  
VDR  
IRS2  
TRIB1  
TXNIP  
PLIN2  
CNR1  
CYBB  
AKT1  
ABCD1  
FOXO1  
GOLGA6A  
APRT  
IRS1  
MIR33A  
MFAP1  
NR3C2  
SERPINA1  
RCBTB1  
PNPLA2  
SELENOP  
SOD2  
STAT3  
PPP1R3B  
NR1I2  
FADS2  
CEBPA  
CETP  
SLC27A5  
APOA5  
COL1A1  
KLF6  
NRG4  
TMC4  
EGFR

EPAS1  
FABP4  
FGL1  
FLII  
GCK  
IFNL3  
HIF1A  
HP  
HSD11B1  
IFNG  
APP  
IL18  
INSR  
MIR29A  
MAP3K5  
CHPT1  
BGLAP  
SPP1  
TLR2  
CCR2  
VEGFA  
FTO  
CASP1  
ABCB11  
TNFSF10  
NAMPT  
FST  
PRRT2  
CMKLR1  
CPT2  
PARP1  
CTNNB1  
GPBAR1  
CYP7A1  
DLAT  
AFP  
AGER  
AGT  
ABCA1

FGFR4  
SMUG1  
GIP  
HPGDS  
GOT2  
NEAT1  
OR10A4  
GPX1  
ANPEP  
NPC1L1  
HMOX1  
CXCL10  
CYP4F3  
ARNTL  
MIR140  
MIR155  
MMP2  
MT1B  
ACLY  
NTS  
MIR378A  
BCO1  
PRKCB  
MAPK8  
PRL  
MIR451A  
CXCL16  
ACE2  
BCL2  
BCL2A1  
SAV1  
SLC10A2  
SMN1  
SMN2  
BNIP3  
TERT  
TIMP1  
TIMP2  
ADIPOR2

BCO2  
CAV1  
GDF15  
BMS1  
NR1I3  
FAS-AS1  
LINC01672  
PSC  
TLR6  
YAP1  
POSTN  
CES1  
CORIN  
CCL27  
MTMR11  
CHIT1  
ECD  
C1QTNF1  
LYPLAL1  
BHLHE23  
MAP3K8  
COX8A  
GPR119  
CYBA  
CYP1A1  
GRK2  
CYP2D6  
ATN1  
MLKL  
ELANE  
ELAVL2  
ESR1  
ESRRA  
ACSL4  
FAT1  
FCGR2B  
SIRT2  
FOXO3  
LPIN1

MLYCD  
FOS  
ALOX12  
ALOX5  
ALOX15  
ALPP  
FNDC5  
ATRNL1  
GC  
GCGR  
PDLIM3  
GLUL  
SLC13A5  
GRN  
SETD2  
NR3C1  
TBK1  
PDIA3  
FOXA1  
ACACB  
HSPA1A  
HSPA1B  
HSP90AA1  
FFAR4  
IDH2  
IRGM  
IGFALS  
CXCL8  
INS  
AQP9  
AR  
ENHO  
LCN2  
LECT2  
MIR126  
MIR149  
MIR20A  
MIR200C  
MIR222



MAS1  
MC4R  
MMP13  
PLIN5  
MUC1  
ATF3  
ATHS  
CCN3  
MIR375  
TNFRSF11B  
IL22  
ACOX1  
ADIPOR1  
CRNKL1  
HSD17B7  
GDE1  
ENPP1  
LUC7L3  
FAM3B  
UGT1A1  
ELOVL2  
AVP  
NAT10  
PTPA  
MEG3  
MAPK1  
MYDGF  
AZGP1  
PRTN3  
PTGS1  
MIR146B  
PTPN1  
NLRC4  
BCAT1  
MOK  
FAM3A  
ROCK1  
HCC  
S100A8

CEACAM1  
SCP2  
CCL20  
SELPLG  
ABCG5  
IL25  
SLC2A1  
SLC2A2  
NCF1  
SLPI  
SPARC  
SPINK1  
SPTBN1  
STAT5A  
STAT5B  
TEK  
TRPV1  
DHRS11  
STEAP4  
CALCR  
ASRGL1  
CASP3  
CASP8  
ORAI1  
TNFSF11  
SOCS1  
CBR1  
RIPK1  
CCN4  
APLN  
SELENBP1  
SOCS3  
USP10  
CD5L  
CD163  
PPIG  
CD68  
MIR873  
MIR190B

CD24  
MIR1224  
PARP2  
LOC100505909  
OCLN  
DNM1L  
ERVK-2  
PARTICL  
PIIF  
IFNL4  
LRPPRC  
SLC25A13  
CDK4  
B4GALT1-AS1  
PRMT3  
PLIN3  
CDK8  
FSTL3  
CDKN2A  
ZNF267  
AKR1A1  
MERTK  
CAP1  
STK25  
NCOA2  
ATG7  
LINC01684  
PRDX4  
CEL  
SORBS1  
AHSA1  
ERLIN1  
CAMKK2  
CXCR6  
SIRT1-AS  
TNFSF13B  
EBP  
YME1L1  
PLK4

HPSE  
PGRMC1  
NMU  
TMED2  
SLC27A2  
LILRB4  
RIPK3  
LOC110806263  
ADAMTS13  
TREH  
LNCARSR  
DUSP12  
CHRM3  
VSIG4  
MGLL  
TXNRD3  
CHUK  
C1QTNF3  
CIDEA  
H3P10  
TWIST2  
CLCN2  
IFTAP  
CYP2R1  
CPT1C  
CNR2  
COL3A1  
SLC31A1  
ADM  
PPARGC1B  
NADK2  
CP  
CPN1  
CPOX  
CPS1  
CREB1  
ATF2  
CREBBP  
CRK

CRMP1  
MAPK14  
FGFBP3  
CSF3  
CSF3R  
SLC38A8  
ZFP90  
CILP2  
CTAA1  
HJV  
CTF1  
CCN2  
PDIK1L  
CTNNA1  
SIK1  
HORMAD2  
CTRL  
CTSB  
CTSD  
CTSG  
CTSS  
ADRB2  
SLC2A12  
CYP2A6  
CYP2B6  
CYP2B7P  
CYP2D7  
CYP2J2  
CYP4A11  
CYP8B1  
CYP19A1  
CYP27B1  
CYP51A1  
DBP  
TMPRSS6  
AEBP1  
DDOST  
TIMM8A  
DHCR7

Disgenet

DIO3  
DMD  
DPYSL3  
SLC26A3  
JAG1  
DSPP  
DUSP9  
EDA  
S1PR1  
EEF1A1  
EGF  
EGR1  
EIF4E  
A2M  
LINC01554  
ENO3  
EPHB2  
EPHB6  
EPO  
AKT2  
ERN1  
ESRRB  
EZH2  
F2RL1  
FABP2  
FABP5  
ACSL1  
PTK2B  
UNC5B  
FBN1  
MARCHF8  
FCGR3A  
FCGR3B  
JAZF1  
GPC4  
FGF1  
FGR  
MLXIP  
ZHX2

ALDOB  
DKK1  
PHLPP2  
SARM1  
AKR1B1  
MPRIIP  
MCF2L  
CRTC1  
SIRT4  
ANGPTL2  
BRD4  
SRRM2  
MMD  
FOSB  
FOSL2  
DDAH1  
DAPK2  
MKRN1  
TMEFF2  
IL17RA  
ZBTB38  
G6PC  
PRDX5  
GALR1  
RNF19A  
WWTR1  
TIPARP  
OSBPL3  
APPL1  
POLDIP2  
TOR1AIP1  
PRPF31  
TRPC4AP  
AMD1  
FGF20  
AMD1P2  
LATS2  
AATF  
GDNF

NOX1  
SIGLEC7  
INTU  
NAAA  
IL37  
GPC3  
GLB1  
GCLC  
RBMS3  
GLI2  
MAT2B  
GLRX  
GNA12  
GNAI3  
GNAO1  
ABO  
GPI  
ANGPT1  
BTBD8  
ANGPT2  
GPR31  
FFAR2  
GPS2  
MYLIP  
CTNNA3  
GSK3B  
GSTM2  
REPIN1  
CERS2  
DMGDH  
SLC2A8  
SLC40A1  
H2AX  
HADHB  
HADH  
HCFC1  
HLA-A  
HLA-C  
HLA-DQA1



HLA-DQB1  
HLA-DQB2  
HLA-DRB1  
AOX1  
NR4A1  
FOXA2  
BPIFA4P  
APOF  
HOXD13  
AIRE  
HRG  
PRMT1  
HSPA4  
HSPA5  
XIAP  
HSPA8  
HSPG2  
APOA1  
HTR2A  
APOA2  
TNC  
HCAR2  
C1QTNF9  
STING1  
CPP  
IFNA1  
IFNA2  
IFNA13  
MOGAT3  
IGF2  
IGFBP1  
IGFBP2  
IGFBP4  
IGFBP7  
KLK3  
IKBKB  
IL2  
CXCR2  
IRF2BP2

INPP5D  
INSIG1  
AQP7  
IRF3  
ITGAM  
ITGB1  
ITIH4  
ITPR2  
JAK1  
JUN  
JUNB  
JUND  
CD82  
AREG  
ACAT1  
ARG2  
KRT8  
RTL1  
C1QL3  
LCAT  
LCP1  
LGALS3  
LIPE  
FADS1  
LNPEP  
LOXL2  
LRP6  
LINC01194  
ARNT  
LTF  
LUM  
MIR130A  
MIR132  
MIR136  
MIR141  
MIR142  
MIR143  
MIR144  
MIR146A

MIR150  
MIR15B  
MIR17  
MIR185  
MIR200B  
MIR205  
MIR206  
MIR212  
MIR223  
MIR23B  
MIR24-1  
MIR27A  
MIR27B  
MIR29B1  
MIR29B2  
MIR29C  
MIR30B  
MIR30C1  
MIR30C2  
ARRB1  
SMAD7  
MAT1A  
DNAJB9  
MEFV  
MET  
MIF  
CXCL9  
MMP9  
MPI  
MPO  
MPST  
MRC1  
ASNS  
EIF2AK4  
MIR330  
MIR331  
MIR367  
MST1  
ND6

MYC  
MYD88  
HNRNPM  
ATF4  
NBN  
NEU1  
NHS  
NNMT  
NOS2  
NOS3  
NOTCH1  
NRF1  
NUCB2  
CISD2  
MIR361  
MIR423  
P2RX5  
P4HA1  
DUOX2  
NOX4  
IL20  
PAPPA  
PC  
SOST  
PCK1  
ABHD5  
INSIG2  
MBTPS2  
ISYNA1  
SIRT6  
PDGFRB  
ARID4B  
SERPINA4  
SERPINB6  
PIGR  
PITX3  
PKM  
PKNOX1  
PLCG1

PLG  
PLTP  
PMCH  
DUOX1  
TREM1  
CCHCR1  
UGT1A10  
UGT1A8  
UGT1A7  
UGT1A6  
EGLN1  
UGT1A4  
CROT  
TET2  
SLC52A1  
PPP1R3C  
PIWIL2  
NUDT11  
APPL2  
SLC47A1  
CWF19L1  
FBXW7  
CHDH  
NLRP2  
TRERF1  
ALLC  
PAG1  
ACOT13  
PRKDC  
ERBIN  
MAPK3  
MAP2K7  
PRLR  
LGALS14  
UBQLN4  
PNO1  
ADAMTS9  
BAAT  
PCBP4

SMURF1  
PTBP1  
PTGFRN  
MIR20B  
MIR193B  
LRRC7  
SEMA6A  
ARRDC3  
PTPN6  
PTPRC  
PTX3  
BAX  
PGAP6  
BCHE  
RARA  
TRPV4  
OPN1LW  
RELA  
ACTB  
RLN2  
BRD2  
RPS6KB1  
SORT1  
S100A4  
CCL5  
CCL17  
CCL19  
CXCL5  
CIDEA  
SELL  
SELP  
SMOC2  
TMBIM1  
SETMAR  
SFRP4  
ABCG8  
SFRP5  
SRSF3  
NSD1

XPO4  
BLVRA  
GORASP1  
ARV1  
ST3GAL4  
WNK1  
SLC2A4  
BMP4  
SLC3A2  
FRTS1  
SLC6A2  
SNHG20  
SLC10A1  
BMP8B  
SLC13A1  
AACS  
SMPD1  
SIGLEC1  
SNAI1  
SORD  
SP1  
SPRR2A  
SQLE  
AKR1D1  
STAR  
STAT1  
STAT6  
SULT1E1  
STK11  
SYT1  
ADAM17  
MAP3K7  
TAZ  
MIR33B  
MIR590  
TCF7L2  
TFAM  
TFF3  
TG

TGFB1I1  
TSPO  
THRSP  
TIMP3  
TLL1  
TLR1  
NR2E1  
TM7SF2  
TMPO  
TNFAIP3  
TNFRSF1A  
TP53BP1  
TPO  
C3  
TRAF3  
DNLZ  
HULC  
UCP1  
UCP3  
SLC35A2  
UGT1A  
UGT2B4  
USP4  
UROD  
UTRN  
VCAM1  
VEGFC  
VIP  
BEST1  
YY1  
ZBTB16  
DUSP26  
ELOVL6  
APOO  
LAP  
PLA2G7  
TFEB  
CALCA  
AIMP2



NLRX1  
KCTD17  
GSDMD  
DHDDS  
HKDC1  
STAM  
CPEB4  
COASY  
FOSL1  
FGF23  
SPX  
SLC7A5  
BAS  
SESN2  
TRAPPC9  
ITCH  
ANGPTL6  
PLA2G6  
CHCHD6  
MAK16  
DGAT2  
CARD6  
FAM83A  
PIK3R3  
CYP4F2  
DENR  
RUNX2  
RTCA  
DGAT1  
ABCC3  
MBTPS1  
TNFSF14  
DLK1  
TRIM24  
CES2  
HDAC3  
SQSTM1  
CCNC  
MBD2

WNT3A  
 CCRL2  
 TBL1Y  
 MYOM2  
 TIMD4  
 ZNF300  
 HACD1  
 NOG  
 GLP2R  
 COX5A  
 GRAP2  
 TMPRSS11D  
 EIF2AK3  
 GGPS1  
 ATG5  
 LITAF  
 CLOCK  
 CD44  
 ABCG1  
 KEAP1  
 PLPPR4  
 MFN2  
 CDC42  
 CDH1

| Information of GeneCards |                                                  |                |       |             |           |                                                                                                                                   |
|--------------------------|--------------------------------------------------|----------------|-------|-------------|-----------|-----------------------------------------------------------------------------------------------------------------------------------|
| Gene Symbol              | Description                                      | Category       | Gifts | GC Id       | Relevance | GeneCards Link                                                                                                                    |
| TNF                      | Tumor Necrosis Factor                            | Protein Coding | 51    | GC06P047305 | 100.16    | <a href="https://www.genecards.org/cgi-bin/carddisp.pl?gene=TNF">https://www.genecards.org/cgi-bin/carddisp.pl?gene=TNF</a>       |
| IL6                      | Interleukin 6                                    | Protein Coding | 50    | GC07P022765 | 94.68     | <a href="https://www.genecards.org/cgi-bin/carddisp.pl?gene=IL6">https://www.genecards.org/cgi-bin/carddisp.pl?gene=IL6</a>       |
| INS                      | Insulin                                          | Protein Coding | 48    | GC11M002159 | 94.14     | <a href="https://www.genecards.org/cgi-bin/carddisp.pl?gene=INS">https://www.genecards.org/cgi-bin/carddisp.pl?gene=INS</a>       |
| PNPLA3                   | Patatin Like Phospholipase Domain Containing 3   | Protein Coding | 41    | GC22P043923 | 91.2      | <a href="https://www.genecards.org/cgi-bin/carddisp.pl?gene=PNPLA3">https://www.genecards.org/cgi-bin/carddisp.pl?gene=PNPLA3</a> |
| PPARG                    | Peroxisome Proliferator Activated Receptor Gamma | Protein Coding | 52    | GC03P012287 | 75.38     | <a href="https://www.genecards.org/cgi-bin/carddisp.pl?gene=PPARG">https://www.genecards.org/cgi-bin/carddisp.pl?gene=PPARG</a>   |
| IL1B                     | Interleukin 1 Beta                               | Protein Coding | 48    | GC02M112829 | 75.33     | <a href="https://www.genecards.org/cgi-bin/carddisp.pl?gene=IL1B">https://www.genecards.org/cgi-bin/carddisp.pl?gene=IL1B</a>     |
| GGT1                     | Gamma-Glutamyltransferase 1                      | Protein Coding | 46    | GC22P024927 | 73.1      | <a href="https://www.genecards.org/cgi-bin/carddisp.pl?gene=GGT1">https://www.genecards.org/cgi-bin/carddisp.pl?gene=GGT1</a>     |
| TLR4                     | Toll Like Receptor 4                             | Protein Coding | 51    | GC09P117704 | 72.22     | <a href="https://www.genecards.org/cgi-bin/carddisp.pl?gene=TLR4">https://www.genecards.org/cgi-bin/carddisp.pl?gene=TLR4</a>     |
| HFE                      | Homeostatic Iron Regulator                       | Protein Coding | 43    | GC06P026087 | 71.24     | <a href="https://www.genecards.org/cgi-bin/carddisp.pl?gene=HFE">https://www.genecards.org/cgi-bin/carddisp.pl?gene=HFE</a>       |
| IL10                     | Interleukin 10                                   | Protein Coding | 47    | GC01M206767 | 68.87     | <a href="https://www.genecards.org/cgi-bin/carddisp.pl?gene=IL10">https://www.genecards.org/cgi-bin/carddisp.pl?gene=IL10</a>     |
| LEP                      | Leptin                                           | Protein Coding | 47    | GC07P128241 | 68.42     | <a href="https://www.genecards.org/cgi-bin/carddisp.pl?gene=LEP">https://www.genecards.org/cgi-bin/carddisp.pl?gene=LEP</a>       |
| FAS                      | Fas Cell Surface Death Receptor                  | Protein Coding | 50    | GC10P088969 | 67.65     | <a href="https://www.genecards.org/cgi-bin/carddisp.pl?gene=FAS">https://www.genecards.org/cgi-bin/carddisp.pl?gene=FAS</a>       |

|          |                                                    |                |    |             |       |                                                                                                                                       |
|----------|----------------------------------------------------|----------------|----|-------------|-------|---------------------------------------------------------------------------------------------------------------------------------------|
| TGFB1    | Transforming Growth Factor Beta 1                  | Protein Coding | 52 | GC19M041301 | 67.61 | <a href="https://www.genecards.org/cgi-bin/carddisp.pl?gene=TGFB1">https://www.genecards.org/cgi-bin/carddisp.pl?gene=TGFB1</a>       |
| NR1H4    | Nuclear Receptor Subfamily 1 Group H Member 4      | Protein Coding | 48 | GC12P100473 | 66.88 | <a href="https://www.genecards.org/cgi-bin/carddisp.pl?gene=NR1H4">https://www.genecards.org/cgi-bin/carddisp.pl?gene=NR1H4</a>       |
| AKT1     | AKT Serine/Threonine Kinase 1                      | Protein Coding | 54 | GC14M104769 | 66.1  | <a href="https://www.genecards.org/cgi-bin/carddisp.pl?gene=AKT1">https://www.genecards.org/cgi-bin/carddisp.pl?gene=AKT1</a>         |
| SLC17A5  | Solute Carrier Family 17 Member 5                  | Protein Coding | 44 | GC06M073593 | 65.17 | <a href="https://www.genecards.org/cgi-bin/carddisp.pl?gene=SLC17A5">https://www.genecards.org/cgi-bin/carddisp.pl?gene=SLC17A5</a>   |
| APOB     | Apolipoprotein B                                   | Protein Coding | 45 | GC02M020956 | 64.28 | <a href="https://www.genecards.org/cgi-bin/carddisp.pl?gene=APOB">https://www.genecards.org/cgi-bin/carddisp.pl?gene=APOB</a>         |
| APOE     | Apolipoprotein E                                   | Protein Coding | 50 | GC19P044906 | 63.18 | <a href="https://www.genecards.org/cgi-bin/carddisp.pl?gene=APOE">https://www.genecards.org/cgi-bin/carddisp.pl?gene=APOE</a>         |
| TP53     | Tumor Protein P53                                  | Protein Coding | 54 | GC17M007661 | 60.99 | <a href="https://www.genecards.org/cgi-bin/carddisp.pl?gene=TP53">https://www.genecards.org/cgi-bin/carddisp.pl?gene=TP53</a>         |
| HADHA    | Hydroxyacyl-CoA Dehydrogenase Trifunctional Multic | Protein Coding | 45 | GC02M026190 | 59.82 | <a href="https://www.genecards.org/cgi-bin/carddisp.pl?gene=HADHA">https://www.genecards.org/cgi-bin/carddisp.pl?gene=HADHA</a>       |
| MIR21    | MicroRNA 21                                        | RNA Gene       | 24 | GC17P059841 | 57.95 | <a href="https://www.genecards.org/cgi-bin/carddisp.pl?gene=MIR21">https://www.genecards.org/cgi-bin/carddisp.pl?gene=MIR21</a>       |
| ALB      | Albumin                                            | Protein Coding | 50 | GC04P073397 | 57.76 | <a href="https://www.genecards.org/cgi-bin/carddisp.pl?gene=ALB">https://www.genecards.org/cgi-bin/carddisp.pl?gene=ALB</a>           |
| CAT      | Catalase                                           | Protein Coding | 50 | GC11P034460 | 57.41 | <a href="https://www.genecards.org/cgi-bin/carddisp.pl?gene=CAT">https://www.genecards.org/cgi-bin/carddisp.pl?gene=CAT</a>           |
| IRS1     | Insulin Receptor Substrate 1                       | Protein Coding | 47 | GC02M226731 | 57.25 | <a href="https://www.genecards.org/cgi-bin/carddisp.pl?gene=IRS1">https://www.genecards.org/cgi-bin/carddisp.pl?gene=IRS1</a>         |
| APOA1    | Apolipoprotein A1                                  | Protein Coding | 48 | GC11M116835 | 56.54 | <a href="https://www.genecards.org/cgi-bin/carddisp.pl?gene=APOA1">https://www.genecards.org/cgi-bin/carddisp.pl?gene=APOA1</a>       |
| MTTP     | Microsomal Triglyceride Transfer Protein           | Protein Coding | 44 | GC04P099563 | 56.05 | <a href="https://www.genecards.org/cgi-bin/carddisp.pl?gene=MTTP">https://www.genecards.org/cgi-bin/carddisp.pl?gene=MTTP</a>         |
| RETN     | Resistin                                           | Protein Coding | 43 | GC19P007669 | 55.73 | <a href="https://www.genecards.org/cgi-bin/carddisp.pl?gene=RETN">https://www.genecards.org/cgi-bin/carddisp.pl?gene=RETN</a>         |
| INSR     | Insulin Receptor                                   | Protein Coding | 54 | GC19M007112 | 55.47 | <a href="https://www.genecards.org/cgi-bin/carddisp.pl?gene=INSR">https://www.genecards.org/cgi-bin/carddisp.pl?gene=INSR</a>         |
| LEPR     | Leptin Receptor                                    | Protein Coding | 49 | GC01P065421 | 55.21 | <a href="https://www.genecards.org/cgi-bin/carddisp.pl?gene=LEPR">https://www.genecards.org/cgi-bin/carddisp.pl?gene=LEPR</a>         |
| MIR122   | MicroRNA 122                                       | RNA Gene       | 21 | GC18P058451 | 54.79 | <a href="https://www.genecards.org/cgi-bin/carddisp.pl?gene=MIR122">https://www.genecards.org/cgi-bin/carddisp.pl?gene=MIR122</a>     |
| MLXIPL   | MLX Interacting Protein Like                       | Protein Coding | 41 | GC07M073593 | 52.23 | <a href="https://www.genecards.org/cgi-bin/carddisp.pl?gene=MLXIPL">https://www.genecards.org/cgi-bin/carddisp.pl?gene=MLXIPL</a>     |
| SERPINE1 | Serpin Family E Member 1                           | Protein Coding | 50 | GC07P101127 | 51.96 | <a href="https://www.genecards.org/cgi-bin/carddisp.pl?gene=SERPINE1">https://www.genecards.org/cgi-bin/carddisp.pl?gene=SERPINE1</a> |
| RBP4     | Retinol Binding Protein 4                          | Protein Coding | 44 | GC10M093591 | 51.54 | <a href="https://www.genecards.org/cgi-bin/carddisp.pl?gene=RBP4">https://www.genecards.org/cgi-bin/carddisp.pl?gene=RBP4</a>         |
| UCP2     | Uncoupling Protein 2                               | Protein Coding | 45 | GC11M073974 | 51.5  | <a href="https://www.genecards.org/cgi-bin/carddisp.pl?gene=UCP2">https://www.genecards.org/cgi-bin/carddisp.pl?gene=UCP2</a>         |
| DDIT3    | DNA Damage Inducible Transcript 3                  | Protein Coding | 45 | GC12M057516 | 51.45 | <a href="https://www.genecards.org/cgi-bin/carddisp.pl?gene=DDIT3">https://www.genecards.org/cgi-bin/carddisp.pl?gene=DDIT3</a>       |
| LPL      | Lipoprotein Lipase                                 | Protein Coding | 49 | GC08P019901 | 51.29 | <a href="https://www.genecards.org/cgi-bin/carddisp.pl?gene=LPL">https://www.genecards.org/cgi-bin/carddisp.pl?gene=LPL</a>           |
| NR1H3    | Nuclear Receptor Subfamily 1 Group H Member 3      | Protein Coding | 47 | GC11P047248 | 51.19 | <a href="https://www.genecards.org/cgi-bin/carddisp.pl?gene=NR1H3">https://www.genecards.org/cgi-bin/carddisp.pl?gene=NR1H3</a>       |
| GPT      | Glutamic--Pyruvic Transaminase                     | Protein Coding | 41 | GC08P144502 | 50.87 | <a href="https://www.genecards.org/cgi-bin/carddisp.pl?gene=GPT">https://www.genecards.org/cgi-bin/carddisp.pl?gene=GPT</a>           |
| MIR155   | MicroRNA 155                                       | RNA Gene       | 18 | GC21P025573 | 49.83 | <a href="https://www.genecards.org/cgi-bin/carddisp.pl?gene=MIR155">https://www.genecards.org/cgi-bin/carddisp.pl?gene=MIR155</a>     |
| ABCB11   | ATP Binding Cassette Subfamily B Member 11         | Protein Coding | 45 | GC02M168922 | 49.79 | <a href="https://www.genecards.org/cgi-bin/carddisp.pl?gene=ABCB11">https://www.genecards.org/cgi-bin/carddisp.pl?gene=ABCB11</a>     |
| CCL2     | C-C Motif Chemokine Ligand 2                       | Protein Coding | 48 | GC17P034255 | 49.4  | <a href="https://www.genecards.org/cgi-bin/carddisp.pl?gene=CCL2">https://www.genecards.org/cgi-bin/carddisp.pl?gene=CCL2</a>         |
| PPARGC1A | PPARG Coactivator 1 Alpha                          | Protein Coding | 46 | GC04M023755 | 49.26 | <a href="https://www.genecards.org/cgi-bin/carddisp.pl?gene=PPARGC1A">https://www.genecards.org/cgi-bin/carddisp.pl?gene=PPARGC1A</a> |
| ADIPOQ   | Adiponectin, C1Q And Collagen Domain Containing    | Protein Coding | 45 | GC03P186842 | 49.13 | <a href="https://www.genecards.org/cgi-bin/carddisp.pl?gene=ADIPOQ">https://www.genecards.org/cgi-bin/carddisp.pl?gene=ADIPOQ</a>     |
| IGF1     | Insulin Like Growth Factor 1                       | Protein Coding | 50 | GC12M102395 | 48.68 | <a href="https://www.genecards.org/cgi-bin/carddisp.pl?gene=IGF1">https://www.genecards.org/cgi-bin/carddisp.pl?gene=IGF1</a>         |
| HMOX1    | Heme Oxygenase 1                                   | Protein Coding | 52 | GC22P035380 | 47.4  | <a href="https://www.genecards.org/cgi-bin/carddisp.pl?gene=HMOX1">https://www.genecards.org/cgi-bin/carddisp.pl?gene=HMOX1</a>       |
| PPARA    | Peroxisome Proliferator Activated Receptor Alpha   | Protein Coding | 45 | GC22P046150 | 47.36 | <a href="https://www.genecards.org/cgi-bin/carddisp.pl?gene=PPARA">https://www.genecards.org/cgi-bin/carddisp.pl?gene=PPARA</a>       |
| IRS2     | Insulin Receptor Substrate 2                       | Protein Coding | 44 | GC13M109752 | 47.11 | <a href="https://www.genecards.org/cgi-bin/carddisp.pl?gene=IRS2">https://www.genecards.org/cgi-bin/carddisp.pl?gene=IRS2</a>         |
| TLR2     | Toll Like Receptor 2                               | Protein Coding | 51 | GC04P153684 | 47.01 | <a href="https://www.genecards.org/cgi-bin/carddisp.pl?gene=TLR2">https://www.genecards.org/cgi-bin/carddisp.pl?gene=TLR2</a>         |
| CD36     | CD36 Molecule                                      | Protein Coding | 48 | GC07P080369 | 46.8  | <a href="https://www.genecards.org/cgi-bin/carddisp.pl?gene=CD36">https://www.genecards.org/cgi-bin/carddisp.pl?gene=CD36</a>         |
| CRP      | C-Reactive Protein                                 | Protein Coding | 46 | GC01M159716 | 45.61 | <a href="https://www.genecards.org/cgi-bin/carddisp.pl?gene=CRP">https://www.genecards.org/cgi-bin/carddisp.pl?gene=CRP</a>           |
| HNF4A    | Hepatocyte Nuclear Factor 4 Alpha                  | Protein Coding | 50 | GC20P044355 | 45.34 | <a href="https://www.genecards.org/cgi-bin/carddisp.pl?gene=HNF4A">https://www.genecards.org/cgi-bin/carddisp.pl?gene=HNF4A</a>       |

|         |                                                         |                |    |             |                                                                                                                                           |
|---------|---------------------------------------------------------|----------------|----|-------------|-------------------------------------------------------------------------------------------------------------------------------------------|
| AHSG    | Alpha 2-HS Glycoprotein                                 | Protein Coding | 44 | GC03P186612 | 45 <a href="https://www.genecards.org/cgi-bin/carddisp.pl?gene=AHSG">https://www.genecards.org/cgi-bin/carddisp.pl?gene=AHSG</a>          |
| PTEN    | Phosphatase And Tensin Homolog                          | Protein Coding | 52 | GC10P087863 | 44.94 <a href="https://www.genecards.org/cgi-bin/carddisp.pl?gene=PTEN">https://www.genecards.org/cgi-bin/carddisp.pl?gene=PTEN</a>       |
| MTOR    | Mechanistic Target Of Rapamycin Kinase                  | Protein Coding | 54 | GC01M011106 | 44.71 <a href="https://www.genecards.org/cgi-bin/carddisp.pl?gene=MTOR">https://www.genecards.org/cgi-bin/carddisp.pl?gene=MTOR</a>       |
| MIR34A  | MicroRNA 34a                                            | RNA Gene       | 22 | GC01M009151 | 43.68 <a href="https://www.genecards.org/cgi-bin/carddisp.pl?gene=MIR34A">https://www.genecards.org/cgi-bin/carddisp.pl?gene=MIR34A</a>   |
| CXCL8   | C-X-C Motif Chemokine Ligand 8                          | Protein Coding | 41 | GC04P073740 | 43.41 <a href="https://www.genecards.org/cgi-bin/carddisp.pl?gene=CXCL8">https://www.genecards.org/cgi-bin/carddisp.pl?gene=CXCL8</a>     |
| MIR17   | MicroRNA 17                                             | RNA Gene       | 21 | GC13P091350 | 41.73 <a href="https://www.genecards.org/cgi-bin/carddisp.pl?gene=MIR17">https://www.genecards.org/cgi-bin/carddisp.pl?gene=MIR17</a>     |
| ACACA   | Acetyl-CoA Carboxylase Alpha                            | Protein Coding | 48 | GC17M037084 | 41.51 <a href="https://www.genecards.org/cgi-bin/carddisp.pl?gene=ACACA">https://www.genecards.org/cgi-bin/carddisp.pl?gene=ACACA</a>     |
| HGF     | Hepatocyte Growth Factor                                | Protein Coding | 52 | GC07M081699 | 41 <a href="https://www.genecards.org/cgi-bin/carddisp.pl?gene=HGF">https://www.genecards.org/cgi-bin/carddisp.pl?gene=HGF</a>            |
| CYP2E1  | Cytochrome P450 Family 2 Subfamily E Member 1           | Protein Coding | 45 | GC10P133520 | 39.75 <a href="https://www.genecards.org/cgi-bin/carddisp.pl?gene=CYP2E1">https://www.genecards.org/cgi-bin/carddisp.pl?gene=CYP2E1</a>   |
| F2      | Coagulation Factor II, Thrombin                         | Protein Coding | 48 | GC11P046720 | 39.46 <a href="https://www.genecards.org/cgi-bin/carddisp.pl?gene=F2">https://www.genecards.org/cgi-bin/carddisp.pl?gene=F2</a>           |
| MIR126  | MicroRNA 126                                            | RNA Gene       | 22 | GC09P136670 | 39.17 <a href="https://www.genecards.org/cgi-bin/carddisp.pl?gene=MIR126">https://www.genecards.org/cgi-bin/carddisp.pl?gene=MIR126</a>   |
| APOC3   | Apolipoprotein C3                                       | Protein Coding | 43 | GC11P116829 | 39.12 <a href="https://www.genecards.org/cgi-bin/carddisp.pl?gene=APOC3">https://www.genecards.org/cgi-bin/carddisp.pl?gene=APOC3</a>     |
| SOD2    | Superoxide Dismutase 2                                  | Protein Coding | 51 | GC06M159669 | 38.91 <a href="https://www.genecards.org/cgi-bin/carddisp.pl?gene=SOD2">https://www.genecards.org/cgi-bin/carddisp.pl?gene=SOD2</a>       |
| SOCS3   | Suppressor Of Cytokine Signaling 3                      | Protein Coding | 44 | GC17M078356 | 38.57 <a href="https://www.genecards.org/cgi-bin/carddisp.pl?gene=SOCS3">https://www.genecards.org/cgi-bin/carddisp.pl?gene=SOCS3</a>     |
| MIR140  | MicroRNA 140                                            | RNA Gene       | 22 | GC16P069934 | 38.19 <a href="https://www.genecards.org/cgi-bin/carddisp.pl?gene=MIR140">https://www.genecards.org/cgi-bin/carddisp.pl?gene=MIR140</a>   |
| CPT2    | Carnitine Palmitoyltransferase 2                        | Protein Coding | 48 | GC01P053196 | 38.06 <a href="https://www.genecards.org/cgi-bin/carddisp.pl?gene=CPT2">https://www.genecards.org/cgi-bin/carddisp.pl?gene=CPT2</a>       |
| IKBKB   | Inhibitor Of Nuclear Factor Kappa B Kinase Subunit B    | Protein Coding | 52 | GC08P042271 | 37.72 <a href="https://www.genecards.org/cgi-bin/carddisp.pl?gene=IKBKB">https://www.genecards.org/cgi-bin/carddisp.pl?gene=IKBKB</a>     |
| MIR132  | MicroRNA 132                                            | RNA Gene       | 21 | GC17M002049 | 37.46 <a href="https://www.genecards.org/cgi-bin/carddisp.pl?gene=MIR132">https://www.genecards.org/cgi-bin/carddisp.pl?gene=MIR132</a>   |
| IFNG    | Interferon Gamma                                        | Protein Coding | 48 | GC12M068064 | 37.2 <a href="https://www.genecards.org/cgi-bin/carddisp.pl?gene=IFNG">https://www.genecards.org/cgi-bin/carddisp.pl?gene=IFNG</a>        |
| KRT18   | Keratin 18                                              | Protein Coding | 48 | GC12P052948 | 37.06 <a href="https://www.genecards.org/cgi-bin/carddisp.pl?gene=KRT18">https://www.genecards.org/cgi-bin/carddisp.pl?gene=KRT18</a>     |
| FASN    | Fatty Acid Synthase                                     | Protein Coding | 49 | GC17M082078 | 37.02 <a href="https://www.genecards.org/cgi-bin/carddisp.pl?gene=FASN">https://www.genecards.org/cgi-bin/carddisp.pl?gene=FASN</a>       |
| MIR22   | MicroRNA 22                                             | RNA Gene       | 20 | GC17M001713 | 36.81 <a href="https://www.genecards.org/cgi-bin/carddisp.pl?gene=MIR22">https://www.genecards.org/cgi-bin/carddisp.pl?gene=MIR22</a>     |
| MIR30A  | MicroRNA 30a                                            | RNA Gene       | 20 | GC06M071403 | 36.47 <a href="https://www.genecards.org/cgi-bin/carddisp.pl?gene=MIR30A">https://www.genecards.org/cgi-bin/carddisp.pl?gene=MIR30A</a>   |
| EIF2AK3 | Eukaryotic Translation Initiation Factor 2 Alpha Kinase | Protein Coding | 48 | GC02M088637 | 36.11 <a href="https://www.genecards.org/cgi-bin/carddisp.pl?gene=EIF2AK3">https://www.genecards.org/cgi-bin/carddisp.pl?gene=EIF2AK3</a> |
| SLC2A4  | Solute Carrier Family 2 Member 4                        | Protein Coding | 45 | GC17P007295 | 35.97 <a href="https://www.genecards.org/cgi-bin/carddisp.pl?gene=SLC2A4">https://www.genecards.org/cgi-bin/carddisp.pl?gene=SLC2A4</a>   |
| CASP3   | Caspase 3                                               | Protein Coding | 50 | GC04M184627 | 35.92 <a href="https://www.genecards.org/cgi-bin/carddisp.pl?gene=CASP3">https://www.genecards.org/cgi-bin/carddisp.pl?gene=CASP3</a>     |
| SREBF1  | Sterol Regulatory Element Binding Transcription Factor  | Protein Coding | 44 | GC17M017810 | 35.54 <a href="https://www.genecards.org/cgi-bin/carddisp.pl?gene=SREBF1">https://www.genecards.org/cgi-bin/carddisp.pl?gene=SREBF1</a>   |
| MIR31   | MicroRNA 31                                             | RNA Gene       | 20 | GC09M021513 | 34.98 <a href="https://www.genecards.org/cgi-bin/carddisp.pl?gene=MIR31">https://www.genecards.org/cgi-bin/carddisp.pl?gene=MIR31</a>     |
| AFP     | Alpha Fetoprotein                                       | Protein Coding | 45 | GC04P073431 | 34.9 <a href="https://www.genecards.org/cgi-bin/carddisp.pl?gene=AFP">https://www.genecards.org/cgi-bin/carddisp.pl?gene=AFP</a>          |
| MIR192  | MicroRNA 192                                            | RNA Gene       | 21 | GC11M064891 | 34.68 <a href="https://www.genecards.org/cgi-bin/carddisp.pl?gene=MIR192">https://www.genecards.org/cgi-bin/carddisp.pl?gene=MIR192</a>   |
| MIR27A  | MicroRNA 27a                                            | RNA Gene       | 22 | GC19M014010 | 34.59 <a href="https://www.genecards.org/cgi-bin/carddisp.pl?gene=MIR27A">https://www.genecards.org/cgi-bin/carddisp.pl?gene=MIR27A</a>   |
| IL1A    | Interleukin 1 Alpha                                     | Protein Coding | 44 | GC02M112773 | 34.54 <a href="https://www.genecards.org/cgi-bin/carddisp.pl?gene=IL1A">https://www.genecards.org/cgi-bin/carddisp.pl?gene=IL1A</a>       |
| CEBPA   | CCAAT Enhancer Binding Protein Alpha                    | Protein Coding | 47 | GC19M033299 | 34.47 <a href="https://www.genecards.org/cgi-bin/carddisp.pl?gene=CEBPA">https://www.genecards.org/cgi-bin/carddisp.pl?gene=CEBPA</a>     |
| MAPK8   | Mitogen-Activated Protein Kinase 8                      | Protein Coding | 50 | GC10P048306 | 34.45 <a href="https://www.genecards.org/cgi-bin/carddisp.pl?gene=MAPK8">https://www.genecards.org/cgi-bin/carddisp.pl?gene=MAPK8</a>     |
| FABP1   | Fatty Acid Binding Protein 1                            | Protein Coding | 43 | GC02M088122 | 34.44 <a href="https://www.genecards.org/cgi-bin/carddisp.pl?gene=FABP1">https://www.genecards.org/cgi-bin/carddisp.pl?gene=FABP1</a>     |
| SIRT1   | Sirtuin 1                                               | Protein Coding | 49 | GC10P067884 | 33.54 <a href="https://www.genecards.org/cgi-bin/carddisp.pl?gene=SIRT1">https://www.genecards.org/cgi-bin/carddisp.pl?gene=SIRT1</a>     |
| MIR29C  | MicroRNA 29c                                            | RNA Gene       | 18 | GC01M207802 | 33.53 <a href="https://www.genecards.org/cgi-bin/carddisp.pl?gene=MIR29C">https://www.genecards.org/cgi-bin/carddisp.pl?gene=MIR29C</a>   |
| VEGFA   | Vascular Endothelial Growth Factor A                    | Protein Coding | 48 | GC06P043770 | 33.2 <a href="https://www.genecards.org/cgi-bin/carddisp.pl?gene=VEGFA">https://www.genecards.org/cgi-bin/carddisp.pl?gene=VEGFA</a>      |
| MIR200B | MicroRNA 200b                                           | RNA Gene       | 20 | GC01P001167 | 32.94 <a href="https://www.genecards.org/cgi-bin/carddisp.pl?gene=MIR200B">https://www.genecards.org/cgi-bin/carddisp.pl?gene=MIR200B</a> |

|          |                                                                  |                |    |             |       |                                                                                                                                       |
|----------|------------------------------------------------------------------|----------------|----|-------------|-------|---------------------------------------------------------------------------------------------------------------------------------------|
| MIR10B   | MicroRNA 10b                                                     | RNA Gene       | 21 | GC02P176150 | 32.91 | <a href="https://www.genecards.org/cgi-bin/carddisp.pl?gene=MIR10B">https://www.genecards.org/cgi-bin/carddisp.pl?gene=MIR10B</a>     |
| MIR200A  | MicroRNA 200a                                                    | RNA Gene       | 21 | GC01P001463 | 32.85 | <a href="https://www.genecards.org/cgi-bin/carddisp.pl?gene=MIR200A">https://www.genecards.org/cgi-bin/carddisp.pl?gene=MIR200A</a>   |
| MIRLET7D | MicroRNA Let-7d                                                  | RNA Gene       | 21 | GC09P094178 | 32.79 | <a href="https://www.genecards.org/cgi-bin/carddisp.pl?gene=MIRLET7D">https://www.genecards.org/cgi-bin/carddisp.pl?gene=MIRLET7D</a> |
| MIR33A   | MicroRNA 33a                                                     | RNA Gene       | 18 | GC22P041900 | 32.74 | <a href="https://www.genecards.org/cgi-bin/carddisp.pl?gene=MIR33A">https://www.genecards.org/cgi-bin/carddisp.pl?gene=MIR33A</a>     |
| CCN2     | Cellular Communication Network Factor 2                          | Protein Coding | 39 | GC06M131948 | 32.47 | <a href="https://www.genecards.org/cgi-bin/carddisp.pl?gene=CCN2">https://www.genecards.org/cgi-bin/carddisp.pl?gene=CCN2</a>         |
| MIR200C  | MicroRNA 200c                                                    | RNA Gene       | 21 | GC12P008229 | 31.87 | <a href="https://www.genecards.org/cgi-bin/carddisp.pl?gene=MIR200C">https://www.genecards.org/cgi-bin/carddisp.pl?gene=MIR200C</a>   |
| CTNNB1   | Catenin Beta 1                                                   | Protein Coding | 53 | GC03P041236 | 31.86 | <a href="https://www.genecards.org/cgi-bin/carddisp.pl?gene=CTNNB1">https://www.genecards.org/cgi-bin/carddisp.pl?gene=CTNNB1</a>     |
| SMPD1    | Sphingomyelin Phosphodiesterase 1                                | Protein Coding | 47 | GC11P006390 | 31.73 | <a href="https://www.genecards.org/cgi-bin/carddisp.pl?gene=SMPD1">https://www.genecards.org/cgi-bin/carddisp.pl?gene=SMPD1</a>       |
| MIR183   | MicroRNA 183                                                     | RNA Gene       | 18 | GC07M129789 | 31.56 | <a href="https://www.genecards.org/cgi-bin/carddisp.pl?gene=MIR183">https://www.genecards.org/cgi-bin/carddisp.pl?gene=MIR183</a>     |
| CTLA4    | Cytotoxic T-Lymphocyte Associated Protein 4                      | Protein Coding | 45 | GC02P203867 | 31.56 | <a href="https://www.genecards.org/cgi-bin/carddisp.pl?gene=CTLA4">https://www.genecards.org/cgi-bin/carddisp.pl?gene=CTLA4</a>       |
| SERPINA1 | Serpin Family A Member 1                                         | Protein Coding | 49 | GC14M094376 | 31.54 | <a href="https://www.genecards.org/cgi-bin/carddisp.pl?gene=SERPINA1">https://www.genecards.org/cgi-bin/carddisp.pl?gene=SERPINA1</a> |
| LMNA     | Lamin A/C                                                        | Protein Coding | 47 | GC01P156082 | 31.44 | <a href="https://www.genecards.org/cgi-bin/carddisp.pl?gene=LMNA">https://www.genecards.org/cgi-bin/carddisp.pl?gene=LMNA</a>         |
| STAT3    | Signal Transducer And Activator Of Transcription 3               | Protein Coding | 52 | GC17M042313 | 31.4  | <a href="https://www.genecards.org/cgi-bin/carddisp.pl?gene=STAT3">https://www.genecards.org/cgi-bin/carddisp.pl?gene=STAT3</a>       |
| MIR130A  | MicroRNA 130a                                                    | RNA Gene       | 20 | GC11P057641 | 30.95 | <a href="https://www.genecards.org/cgi-bin/carddisp.pl?gene=MIR130A">https://www.genecards.org/cgi-bin/carddisp.pl?gene=MIR130A</a>   |
| FABP4    | Fatty Acid Binding Protein 4                                     | Protein Coding | 44 | GC08M081478 | 30.91 | <a href="https://www.genecards.org/cgi-bin/carddisp.pl?gene=FABP4">https://www.genecards.org/cgi-bin/carddisp.pl?gene=FABP4</a>       |
| ACE      | Angiotensin I Converting Enzyme                                  | Protein Coding | 49 | GC17P063477 | 30.9  | <a href="https://www.genecards.org/cgi-bin/carddisp.pl?gene=ACE">https://www.genecards.org/cgi-bin/carddisp.pl?gene=ACE</a>           |
| PIK3CA   | Phosphatidylinositol-4,5-Bisphosphate 3-Kinase Catalytic Subunit | Protein Coding | 52 | GC03P179148 | 30.83 | <a href="https://www.genecards.org/cgi-bin/carddisp.pl?gene=PIK3CA">https://www.genecards.org/cgi-bin/carddisp.pl?gene=PIK3CA</a>     |
| MFN2     | Mitofusin 2                                                      | Protein Coding | 48 | GC01P011980 | 30.81 | <a href="https://www.genecards.org/cgi-bin/carddisp.pl?gene=MFN2">https://www.genecards.org/cgi-bin/carddisp.pl?gene=MFN2</a>         |
| RELA     | RELA Proto-Oncogene, NF-KB Subunit                               | Protein Coding | 50 | GC11M065653 | 30.6  | <a href="https://www.genecards.org/cgi-bin/carddisp.pl?gene=RELA">https://www.genecards.org/cgi-bin/carddisp.pl?gene=RELA</a>         |
| ATP7B    | ATPase Copper Transporting Beta                                  | Protein Coding | 47 | GC13M051930 | 30.57 | <a href="https://www.genecards.org/cgi-bin/carddisp.pl?gene=ATP7B">https://www.genecards.org/cgi-bin/carddisp.pl?gene=ATP7B</a>       |
| MIRLET7E | MicroRNA Let-7e                                                  | RNA Gene       | 20 | GC19P051718 | 30.55 | <a href="https://www.genecards.org/cgi-bin/carddisp.pl?gene=MIRLET7E">https://www.genecards.org/cgi-bin/carddisp.pl?gene=MIRLET7E</a> |
| GHRL     | Ghrelin And Obestatin Prepropeptide                              | Protein Coding | 43 | GC03M010285 | 30.53 | <a href="https://www.genecards.org/cgi-bin/carddisp.pl?gene=GHRL">https://www.genecards.org/cgi-bin/carddisp.pl?gene=GHRL</a>         |
| MIR107   | MicroRNA 107                                                     | RNA Gene       | 19 | GC10M089600 | 30.48 | <a href="https://www.genecards.org/cgi-bin/carddisp.pl?gene=MIR107">https://www.genecards.org/cgi-bin/carddisp.pl?gene=MIR107</a>     |
| MIR26A1  | MicroRNA 26a-1                                                   | RNA Gene       | 20 | GC03P037969 | 30.29 | <a href="https://www.genecards.org/cgi-bin/carddisp.pl?gene=MIR26A1">https://www.genecards.org/cgi-bin/carddisp.pl?gene=MIR26A1</a>   |
| ABCA1    | ATP Binding Cassette Subfamily A Member 1                        | Protein Coding | 48 | GC09M104781 | 30.24 | <a href="https://www.genecards.org/cgi-bin/carddisp.pl?gene=ABCA1">https://www.genecards.org/cgi-bin/carddisp.pl?gene=ABCA1</a>       |
| NAFLD1   | Fatty Liver Disease 1, Susceptibility To                         | Genetic Locus  | 2  | GC22U901005 | 30.23 | <a href="https://www.genecards.org/cgi-bin/carddisp.pl?gene=NAFLD1">https://www.genecards.org/cgi-bin/carddisp.pl?gene=NAFLD1</a>     |
| MIR203A  | MicroRNA 203a                                                    | RNA Gene       | 19 | GC14P104655 | 30.22 | <a href="https://www.genecards.org/cgi-bin/carddisp.pl?gene=MIR203A">https://www.genecards.org/cgi-bin/carddisp.pl?gene=MIR203A</a>   |
| MTHFR    | Methylenetetrahydrofolate Reductase                              | Protein Coding | 47 | GC01M011785 | 29.94 | <a href="https://www.genecards.org/cgi-bin/carddisp.pl?gene=MTHFR">https://www.genecards.org/cgi-bin/carddisp.pl?gene=MTHFR</a>       |
| FASLG    | Fas Ligand                                                       | Protein Coding | 47 | GC01P172628 | 29.64 | <a href="https://www.genecards.org/cgi-bin/carddisp.pl?gene=FASLG">https://www.genecards.org/cgi-bin/carddisp.pl?gene=FASLG</a>       |
| TM6SF2   | Transmembrane 6 Superfamily Member 2                             | Protein Coding | 29 | GC19M019264 | 29.55 | <a href="https://www.genecards.org/cgi-bin/carddisp.pl?gene=TM6SF2">https://www.genecards.org/cgi-bin/carddisp.pl?gene=TM6SF2</a>     |
| MSR1     | Macrophage Scavenger Receptor 1                                  | Protein Coding | 46 | GC08M016107 | 29.52 | <a href="https://www.genecards.org/cgi-bin/carddisp.pl?gene=MSR1">https://www.genecards.org/cgi-bin/carddisp.pl?gene=MSR1</a>         |
| EGFR     | Epidermal Growth Factor Receptor                                 | Protein Coding | 54 | GC07P055019 | 29.5  | <a href="https://www.genecards.org/cgi-bin/carddisp.pl?gene=EGFR">https://www.genecards.org/cgi-bin/carddisp.pl?gene=EGFR</a>         |
| MIR16-1  | MicroRNA 16-1                                                    | RNA Gene       | 21 | GC13M050048 | 29.49 | <a href="https://www.genecards.org/cgi-bin/carddisp.pl?gene=MIR16-1">https://www.genecards.org/cgi-bin/carddisp.pl?gene=MIR16-1</a>   |
| MARS1    | Methionyl-TRNA Synthetase 1                                      | Protein Coding | 35 | GC12P057476 | 29.42 | <a href="https://www.genecards.org/cgi-bin/carddisp.pl?gene=MARS1">https://www.genecards.org/cgi-bin/carddisp.pl?gene=MARS1</a>       |
| XBP1     | X-Box Binding Protein 1                                          | Protein Coding | 45 | GC22M028794 | 29.21 | <a href="https://www.genecards.org/cgi-bin/carddisp.pl?gene=XBP1">https://www.genecards.org/cgi-bin/carddisp.pl?gene=XBP1</a>         |
| MIR125A  | MicroRNA 125a                                                    | RNA Gene       | 21 | GC19P051720 | 28.9  | <a href="https://www.genecards.org/cgi-bin/carddisp.pl?gene=MIR125A">https://www.genecards.org/cgi-bin/carddisp.pl?gene=MIR125A</a>   |
| MMP9     | Matrix Metalloproteinase 9                                       | Protein Coding | 52 | GC20P046008 | 28.83 | <a href="https://www.genecards.org/cgi-bin/carddisp.pl?gene=MMP9">https://www.genecards.org/cgi-bin/carddisp.pl?gene=MMP9</a>         |
| ICAM1    | Intercellular Adhesion Molecule 1                                | Protein Coding | 50 | GC19P010270 | 28.78 | <a href="https://www.genecards.org/cgi-bin/carddisp.pl?gene=ICAM1">https://www.genecards.org/cgi-bin/carddisp.pl?gene=ICAM1</a>       |
| SOD1     | Superoxide Dismutase 1                                           | Protein Coding | 51 | GC21P031659 | 28.74 | <a href="https://www.genecards.org/cgi-bin/carddisp.pl?gene=SOD1">https://www.genecards.org/cgi-bin/carddisp.pl?gene=SOD1</a>         |

|          |                                                        |                |    |              |       |                                                                                                                                       |
|----------|--------------------------------------------------------|----------------|----|--------------|-------|---------------------------------------------------------------------------------------------------------------------------------------|
| CFTR     | CF Transmembrane Conductance Regulator                 | Protein Coding | 51 | GC07P117287  | 28.74 | <a href="https://www.genecards.org/cgi-bin/carddisp.pl?gene=CFTR">https://www.genecards.org/cgi-bin/carddisp.pl?gene=CFTR</a>         |
| MIRLET7C | MicroRNA Let-7c                                        | RNA Gene       | 21 | GC21P016551  | 28.66 | <a href="https://www.genecards.org/cgi-bin/carddisp.pl?gene=MIRLET7C">https://www.genecards.org/cgi-bin/carddisp.pl?gene=MIRLET7C</a> |
| LIPA     | Lipase A, Lysosomal Acid Type                          | Protein Coding | 47 | GC10M089213  | 28.37 | <a href="https://www.genecards.org/cgi-bin/carddisp.pl?gene=LIPA">https://www.genecards.org/cgi-bin/carddisp.pl?gene=LIPA</a>         |
| TNFRSF1A | TNF Receptor Superfamily Member 1A                     | Protein Coding | 49 | GC12M006328  | 28.23 | <a href="https://www.genecards.org/cgi-bin/carddisp.pl?gene=TNFRSF1A">https://www.genecards.org/cgi-bin/carddisp.pl?gene=TNFRSF1A</a> |
| APP      | Amyloid Beta Precursor Protein                         | Protein Coding | 51 | GC21M025880  | 28.14 | <a href="https://www.genecards.org/cgi-bin/carddisp.pl?gene=APP">https://www.genecards.org/cgi-bin/carddisp.pl?gene=APP</a>           |
| ACOX1    | Acyl-CoA Oxidase 1                                     | Protein Coding | 45 | GC17M075941  | 28.09 | <a href="https://www.genecards.org/cgi-bin/carddisp.pl?gene=ACOX1">https://www.genecards.org/cgi-bin/carddisp.pl?gene=ACOX1</a>       |
| CPT1A    | Carnitine Palmitoyltransferase 1A                      | Protein Coding | 48 | GC11M068754  | 28.09 | <a href="https://www.genecards.org/cgi-bin/carddisp.pl?gene=CPT1A">https://www.genecards.org/cgi-bin/carddisp.pl?gene=CPT1A</a>       |
| MIR451A  | MicroRNA 451a                                          | RNA Gene       | 17 | GC17M028861  | 28.04 | <a href="https://www.genecards.org/cgi-bin/carddisp.pl?gene=MIR451A">https://www.genecards.org/cgi-bin/carddisp.pl?gene=MIR451A</a>   |
| NDUFS1   | NADH:Ubiquinone Oxidoreductase Core Subunit S1         | Protein Coding | 45 | GC02M206114  | 28    | <a href="https://www.genecards.org/cgi-bin/carddisp.pl?gene=NDUFS1">https://www.genecards.org/cgi-bin/carddisp.pl?gene=NDUFS1</a>     |
| ABCB4    | ATP Binding Cassette Subfamily B Member 4              | Protein Coding | 45 | GC07M087401  | 27.87 | <a href="https://www.genecards.org/cgi-bin/carddisp.pl?gene=ABCB4">https://www.genecards.org/cgi-bin/carddisp.pl?gene=ABCB4</a>       |
| ADIPOR1  | Adiponectin Receptor 1                                 | Protein Coding | 44 | GC01M202940  | 27.84 | <a href="https://www.genecards.org/cgi-bin/carddisp.pl?gene=ADIPOR1">https://www.genecards.org/cgi-bin/carddisp.pl?gene=ADIPOR1</a>   |
| CAV1     | Caveolin 1                                             | Protein Coding | 48 | GC07P116524  | 27.79 | <a href="https://www.genecards.org/cgi-bin/carddisp.pl?gene=CAV1">https://www.genecards.org/cgi-bin/carddisp.pl?gene=CAV1</a>         |
| TIMP1    | TIMP Metallopeptidase Inhibitor 1                      | Protein Coding | 45 | GC0XP047583  | 27.46 | <a href="https://www.genecards.org/cgi-bin/carddisp.pl?gene=TIMP1">https://www.genecards.org/cgi-bin/carddisp.pl?gene=TIMP1</a>       |
| MIR30D   | MicroRNA 30d                                           | RNA Gene       | 17 | GC08M134804  | 27.33 | <a href="https://www.genecards.org/cgi-bin/carddisp.pl?gene=MIR30D">https://www.genecards.org/cgi-bin/carddisp.pl?gene=MIR30D</a>     |
| IL18     | Interleukin 18                                         | Protein Coding | 44 | GC11M112143  | 27.32 | <a href="https://www.genecards.org/cgi-bin/carddisp.pl?gene=IL18">https://www.genecards.org/cgi-bin/carddisp.pl?gene=IL18</a>         |
| ADIPOR2  | Adiponectin Receptor 2                                 | Protein Coding | 43 | GC12P001670  | 27.28 | <a href="https://www.genecards.org/cgi-bin/carddisp.pl?gene=ADIPOR2">https://www.genecards.org/cgi-bin/carddisp.pl?gene=ADIPOR2</a>   |
| MIR378A  | MicroRNA 378a                                          | RNA Gene       | 18 | GC05P149732  | 27.24 | <a href="https://www.genecards.org/cgi-bin/carddisp.pl?gene=MIR378A">https://www.genecards.org/cgi-bin/carddisp.pl?gene=MIR378A</a>   |
| STAT1    | Signal Transducer And Activator Of Transcription 1     | Protein Coding | 53 | GC02M190908  | 27.2  | <a href="https://www.genecards.org/cgi-bin/carddisp.pl?gene=STAT1">https://www.genecards.org/cgi-bin/carddisp.pl?gene=STAT1</a>       |
| JUN      | Jun Proto-Oncogene, AP-1 Transcription Factor Subunit  | Protein Coding | 49 | GC01M058780  | 26.99 | <a href="https://www.genecards.org/cgi-bin/carddisp.pl?gene=JUN">https://www.genecards.org/cgi-bin/carddisp.pl?gene=JUN</a>           |
| MIR483   | MicroRNA 483                                           | RNA Gene       | 18 | GC11M002188  | 26.98 | <a href="https://www.genecards.org/cgi-bin/carddisp.pl?gene=MIR483">https://www.genecards.org/cgi-bin/carddisp.pl?gene=MIR483</a>     |
| CASP8    | Caspase 8                                              | Protein Coding | 52 | GC02P201233  | 26.88 | <a href="https://www.genecards.org/cgi-bin/carddisp.pl?gene=CASP8">https://www.genecards.org/cgi-bin/carddisp.pl?gene=CASP8</a>       |
| CP       | Ceruloplasmin                                          | Protein Coding | 47 | GC03M149162  | 26.83 | <a href="https://www.genecards.org/cgi-bin/carddisp.pl?gene=CP">https://www.genecards.org/cgi-bin/carddisp.pl?gene=CP</a>             |
| LCAT     | Lecithin-Cholesterol Acyltransferase                   | Protein Coding | 47 | GC16M067939  | 26.82 | <a href="https://www.genecards.org/cgi-bin/carddisp.pl?gene=LCAT">https://www.genecards.org/cgi-bin/carddisp.pl?gene=LCAT</a>         |
| MAP3K5   | Mitogen-Activated Protein Kinase Kinase Kinase 5       | Protein Coding | 47 | GC06M136557  | 26.78 | <a href="https://www.genecards.org/cgi-bin/carddisp.pl?gene=MAP3K5">https://www.genecards.org/cgi-bin/carddisp.pl?gene=MAP3K5</a>     |
| CDKN2A   | Cyclin Dependent Kinase Inhibitor 2A                   | Protein Coding | 51 | GC09M021967  | 26.72 | <a href="https://www.genecards.org/cgi-bin/carddisp.pl?gene=CDKN2A">https://www.genecards.org/cgi-bin/carddisp.pl?gene=CDKN2A</a>     |
| MMP2     | Matrix Metallopeptidase 2                              | Protein Coding | 53 | GC16P055390  | 26.56 | <a href="https://www.genecards.org/cgi-bin/carddisp.pl?gene=MMP2">https://www.genecards.org/cgi-bin/carddisp.pl?gene=MMP2</a>         |
| MT-TK    | Mitochondrially Encoded tRNA-Lys (AAA/G)               | RNA Gene       | 14 | GCMTTP008297 | 26.54 | <a href="https://www.genecards.org/cgi-bin/carddisp.pl?gene=MT-TK">https://www.genecards.org/cgi-bin/carddisp.pl?gene=MT-TK</a>       |
| ATF4     | Activating Transcription Factor 4                      | Protein Coding | 46 | GC22P039525  | 26.39 | <a href="https://www.genecards.org/cgi-bin/carddisp.pl?gene=ATF4">https://www.genecards.org/cgi-bin/carddisp.pl?gene=ATF4</a>         |
| CYCS     | Cytochrome C, Somatic                                  | Protein Coding | 48 | GC07M025118  | 26.35 | <a href="https://www.genecards.org/cgi-bin/carddisp.pl?gene=CYCS">https://www.genecards.org/cgi-bin/carddisp.pl?gene=CYCS</a>         |
| HMGCR    | 3-Hydroxy-3-Methylglutaryl-CoA Reductase               | Protein Coding | 45 | GC05P075336  | 26.33 | <a href="https://www.genecards.org/cgi-bin/carddisp.pl?gene=HMGCR">https://www.genecards.org/cgi-bin/carddisp.pl?gene=HMGCR</a>       |
| TTR      | Transthyretin                                          | Protein Coding | 49 | GC18P031557  | 26.32 | <a href="https://www.genecards.org/cgi-bin/carddisp.pl?gene=TTR">https://www.genecards.org/cgi-bin/carddisp.pl?gene=TTR</a>           |
| NOTCH1   | Notch Receptor 1                                       | Protein Coding | 51 | GC09M136602  | 26.32 | <a href="https://www.genecards.org/cgi-bin/carddisp.pl?gene=NOTCH1">https://www.genecards.org/cgi-bin/carddisp.pl?gene=NOTCH1</a>     |
| TF       | Transferrin                                            | Protein Coding | 49 | GC03P133666  | 26.01 | <a href="https://www.genecards.org/cgi-bin/carddisp.pl?gene=TF">https://www.genecards.org/cgi-bin/carddisp.pl?gene=TF</a>             |
| MPO      | Myeloperoxidase                                        | Protein Coding | 50 | GC17M058269  | 25.94 | <a href="https://www.genecards.org/cgi-bin/carddisp.pl?gene=MPO">https://www.genecards.org/cgi-bin/carddisp.pl?gene=MPO</a>           |
| MYC      | MYC Proto-Oncogene, BHLH Transcription Factor          | Protein Coding | 51 | GC08P127735  | 25.92 | <a href="https://www.genecards.org/cgi-bin/carddisp.pl?gene=MYC">https://www.genecards.org/cgi-bin/carddisp.pl?gene=MYC</a>           |
| FGF21    | Fibroblast Growth Factor 21                            | Protein Coding | 40 | GC19P048766  | 25.91 | <a href="https://www.genecards.org/cgi-bin/carddisp.pl?gene=FGF21">https://www.genecards.org/cgi-bin/carddisp.pl?gene=FGF21</a>       |
| LDLR     | Low Density Lipoprotein Receptor                       | Protein Coding | 49 | GC19P011061  | 25.85 | <a href="https://www.genecards.org/cgi-bin/carddisp.pl?gene=LDLR">https://www.genecards.org/cgi-bin/carddisp.pl?gene=LDLR</a>         |
| TERT     | Telomerase Reverse Transcriptase                       | Protein Coding | 51 | GC05M001253  | 25.67 | <a href="https://www.genecards.org/cgi-bin/carddisp.pl?gene=TERT">https://www.genecards.org/cgi-bin/carddisp.pl?gene=TERT</a>         |
| SREBF2   | Sterol Regulatory Element Binding Transcription Factor | Protein Coding | 43 | GC22P041833  | 25.47 | <a href="https://www.genecards.org/cgi-bin/carddisp.pl?gene=SREBF2">https://www.genecards.org/cgi-bin/carddisp.pl?gene=SREBF2</a>     |

|          |                                                                       |                |    |             |       |                                                                                                                                       |
|----------|-----------------------------------------------------------------------|----------------|----|-------------|-------|---------------------------------------------------------------------------------------------------------------------------------------|
| NAFLD2   | Fatty Liver Disease, Nonalcoholic, Susceptibility To, 2 Genetic Locus |                | 2  | GC11U901533 | 25.45 | <a href="https://www.genecards.org/cgi-bin/carddisp.pl?gene=NAFLD2">https://www.genecards.org/cgi-bin/carddisp.pl?gene=NAFLD2</a>     |
| PON1     | Paraoxonase 1                                                         | Protein Coding | 45 | GC07M095297 | 25.43 | <a href="https://www.genecards.org/cgi-bin/carddisp.pl?gene=PON1">https://www.genecards.org/cgi-bin/carddisp.pl?gene=PON1</a>         |
| IL1RN    | Interleukin 1 Receptor Antagonist                                     | Protein Coding | 48 | GC02P115307 | 25.34 | <a href="https://www.genecards.org/cgi-bin/carddisp.pl?gene=IL1RN">https://www.genecards.org/cgi-bin/carddisp.pl?gene=IL1RN</a>       |
| NFKB1    | Nuclear Factor Kappa B Subunit 1                                      | Protein Coding | 52 | GC04P102501 | 25.07 | <a href="https://www.genecards.org/cgi-bin/carddisp.pl?gene=NFKB1">https://www.genecards.org/cgi-bin/carddisp.pl?gene=NFKB1</a>       |
| EGF      | Epidermal Growth Factor                                               | Protein Coding | 51 | GC04P109912 | 25.05 | <a href="https://www.genecards.org/cgi-bin/carddisp.pl?gene=EGF">https://www.genecards.org/cgi-bin/carddisp.pl?gene=EGF</a>           |
| VWF      | Von Willebrand Factor                                                 | Protein Coding | 48 | GC12M005917 | 25.04 | <a href="https://www.genecards.org/cgi-bin/carddisp.pl?gene=VWF">https://www.genecards.org/cgi-bin/carddisp.pl?gene=VWF</a>           |
| SMAD4    | SMAD Family Member 4                                                  | Protein Coding | 50 | GC18P051028 | 24.89 | <a href="https://www.genecards.org/cgi-bin/carddisp.pl?gene=SMAD4">https://www.genecards.org/cgi-bin/carddisp.pl?gene=SMAD4</a>       |
| JAG1     | Jagged Canonical Notch Ligand 1                                       | Protein Coding | 50 | GC20M010637 | 24.62 | <a href="https://www.genecards.org/cgi-bin/carddisp.pl?gene=JAG1">https://www.genecards.org/cgi-bin/carddisp.pl?gene=JAG1</a>         |
| SQSTM1   | Sequestosome 1                                                        | Protein Coding | 48 | GC05P179806 | 24.54 | <a href="https://www.genecards.org/cgi-bin/carddisp.pl?gene=SQSTM1">https://www.genecards.org/cgi-bin/carddisp.pl?gene=SQSTM1</a>     |
| MIR429   | MicroRNA 429                                                          | RNA Gene       | 19 | GC01P001464 | 24.18 | <a href="https://www.genecards.org/cgi-bin/carddisp.pl?gene=MIR429">https://www.genecards.org/cgi-bin/carddisp.pl?gene=MIR429</a>     |
| SLC25A13 | Solute Carrier Family 25 Member 13                                    | Protein Coding | 46 | GC07M096120 | 24.07 | <a href="https://www.genecards.org/cgi-bin/carddisp.pl?gene=SLC25A13">https://www.genecards.org/cgi-bin/carddisp.pl?gene=SLC25A13</a> |
| PIK3R1   | Phosphoinositide-3-Kinase Regulatory Subunit 1                        | Protein Coding | 51 | GC05P068215 | 24.02 | <a href="https://www.genecards.org/cgi-bin/carddisp.pl?gene=PIK3R1">https://www.genecards.org/cgi-bin/carddisp.pl?gene=PIK3R1</a>     |
| ESR1     | Estrogen Receptor 1                                                   | Protein Coding | 53 | GC06P151656 | 23.91 | <a href="https://www.genecards.org/cgi-bin/carddisp.pl?gene=ESR1">https://www.genecards.org/cgi-bin/carddisp.pl?gene=ESR1</a>         |
| CCND1    | Cyclin D1                                                             | Protein Coding | 52 | GC11P069641 | 23.86 | <a href="https://www.genecards.org/cgi-bin/carddisp.pl?gene=CCND1">https://www.genecards.org/cgi-bin/carddisp.pl?gene=CCND1</a>       |
| NOS2     | Nitric Oxide Synthase 2                                               | Protein Coding | 49 | GC17M027756 | 23.83 | <a href="https://www.genecards.org/cgi-bin/carddisp.pl?gene=NOS2">https://www.genecards.org/cgi-bin/carddisp.pl?gene=NOS2</a>         |
| BSCL2    | BSCL2 Lipid Droplet Biogenesis Associated, Seipin                     | Protein Coding | 42 | GC11M063438 | 23.78 | <a href="https://www.genecards.org/cgi-bin/carddisp.pl?gene=BSCL2">https://www.genecards.org/cgi-bin/carddisp.pl?gene=BSCL2</a>       |
| AKT2     | AKT Serine/Threonine Kinase 2                                         | Protein Coding | 54 | GC19M040230 | 23.61 | <a href="https://www.genecards.org/cgi-bin/carddisp.pl?gene=AKT2">https://www.genecards.org/cgi-bin/carddisp.pl?gene=AKT2</a>         |
| CETP     | Cholesteryl Ester Transfer Protein                                    | Protein Coding | 46 | GC16P056961 | 23.61 | <a href="https://www.genecards.org/cgi-bin/carddisp.pl?gene=CETP">https://www.genecards.org/cgi-bin/carddisp.pl?gene=CETP</a>         |
| VCP      | Valosin Containing Protein                                            | Protein Coding | 48 | GC09M035056 | 23.59 | <a href="https://www.genecards.org/cgi-bin/carddisp.pl?gene=VCP">https://www.genecards.org/cgi-bin/carddisp.pl?gene=VCP</a>           |
| GANAB    | Glucosidase II Alpha Subunit                                          | Protein Coding | 44 | GC11M063430 | 23.55 | <a href="https://www.genecards.org/cgi-bin/carddisp.pl?gene=GANAB">https://www.genecards.org/cgi-bin/carddisp.pl?gene=GANAB</a>       |
| G6PC     | Glucose-6-Phosphatase Catalytic Subunit                               | Protein Coding | 44 | GC17P042900 | 23.37 | <a href="https://www.genecards.org/cgi-bin/carddisp.pl?gene=G6PC">https://www.genecards.org/cgi-bin/carddisp.pl?gene=G6PC</a>         |
| SPP1     | Secreted Phosphoprotein 1                                             | Protein Coding | 46 | GC04P087975 | 23.32 | <a href="https://www.genecards.org/cgi-bin/carddisp.pl?gene=SPP1">https://www.genecards.org/cgi-bin/carddisp.pl?gene=SPP1</a>         |
| SERPINC1 | Serpin Family C Member 1                                              | Protein Coding | 48 | GC01M174153 | 23.18 | <a href="https://www.genecards.org/cgi-bin/carddisp.pl?gene=SERPINC1">https://www.genecards.org/cgi-bin/carddisp.pl?gene=SERPINC1</a> |
| GCG      | Glucagon                                                              | Protein Coding | 41 | GC02M162142 | 23.09 | <a href="https://www.genecards.org/cgi-bin/carddisp.pl?gene=GCG">https://www.genecards.org/cgi-bin/carddisp.pl?gene=GCG</a>           |
| BAX      | BCL2 Associated X, Apoptosis Regulator                                | Protein Coding | 48 | GC19P048954 | 22.98 | <a href="https://www.genecards.org/cgi-bin/carddisp.pl?gene=BAX">https://www.genecards.org/cgi-bin/carddisp.pl?gene=BAX</a>           |
| HAMP     | Hepcidin Antimicrobial Peptide                                        | Protein Coding | 44 | GC19P038216 | 22.95 | <a href="https://www.genecards.org/cgi-bin/carddisp.pl?gene=HAMP">https://www.genecards.org/cgi-bin/carddisp.pl?gene=HAMP</a>         |
| ABCC2    | ATP Binding Cassette Subfamily C Member 2                             | Protein Coding | 47 | GC10P099782 | 22.91 | <a href="https://www.genecards.org/cgi-bin/carddisp.pl?gene=ABCC2">https://www.genecards.org/cgi-bin/carddisp.pl?gene=ABCC2</a>       |
| HLA-DQB1 | Major Histocompatibility Complex, Class II, DQ Beta                   | Protein Coding | 44 | GC06M032804 | 22.64 | <a href="https://www.genecards.org/cgi-bin/carddisp.pl?gene=HLA-DQB1">https://www.genecards.org/cgi-bin/carddisp.pl?gene=HLA-DQB1</a> |
| BDNF     | Brain Derived Neurotrophic Factor                                     | Protein Coding | 47 | GC11M027654 | 22.63 | <a href="https://www.genecards.org/cgi-bin/carddisp.pl?gene=BDNF">https://www.genecards.org/cgi-bin/carddisp.pl?gene=BDNF</a>         |
| VIM      | Vimentin                                                              | Protein Coding | 50 | GC10P017227 | 22.61 | <a href="https://www.genecards.org/cgi-bin/carddisp.pl?gene=VIM">https://www.genecards.org/cgi-bin/carddisp.pl?gene=VIM</a>           |
| CYP3A4   | Cytochrome P450 Family 3 Subfamily A Member 4                         | Protein Coding | 48 | GC07M099759 | 22.59 | <a href="https://www.genecards.org/cgi-bin/carddisp.pl?gene=CYP3A4">https://www.genecards.org/cgi-bin/carddisp.pl?gene=CYP3A4</a>     |
| PTPN11   | Protein Tyrosine Phosphatase Non-Receptor Type 11                     | Protein Coding | 53 | GC12P112418 | 22.48 | <a href="https://www.genecards.org/cgi-bin/carddisp.pl?gene=PTPN11">https://www.genecards.org/cgi-bin/carddisp.pl?gene=PTPN11</a>     |
| GCKR     | Glucokinase Regulator                                                 | Protein Coding | 40 | GC02P027496 | 22.36 | <a href="https://www.genecards.org/cgi-bin/carddisp.pl?gene=GCKR">https://www.genecards.org/cgi-bin/carddisp.pl?gene=GCKR</a>         |
| ELANE    | Elastase, Neutrophil Expressed                                        | Protein Coding | 46 | GC19P000854 | 22.29 | <a href="https://www.genecards.org/cgi-bin/carddisp.pl?gene=ELANE">https://www.genecards.org/cgi-bin/carddisp.pl?gene=ELANE</a>       |
| DPP4     | Dipeptidyl Peptidase 4                                                | Protein Coding | 50 | GC02M161992 | 22.16 | <a href="https://www.genecards.org/cgi-bin/carddisp.pl?gene=DPP4">https://www.genecards.org/cgi-bin/carddisp.pl?gene=DPP4</a>         |
| MMP1     | Matrix Metalloproteinase 1                                            | Protein Coding | 51 | GC11M102810 | 22.13 | <a href="https://www.genecards.org/cgi-bin/carddisp.pl?gene=MMP1">https://www.genecards.org/cgi-bin/carddisp.pl?gene=MMP1</a>         |
| CDKN1A   | Cyclin Dependent Kinase Inhibitor 1A                                  | Protein Coding | 50 | GC06P047460 | 22.12 | <a href="https://www.genecards.org/cgi-bin/carddisp.pl?gene=CDKN1A">https://www.genecards.org/cgi-bin/carddisp.pl?gene=CDKN1A</a>     |
| NDUFS4   | NADH:Ubiquinone Oxidoreductase Subunit S4                             | Protein Coding | 44 | GC05P053560 | 21.72 | <a href="https://www.genecards.org/cgi-bin/carddisp.pl?gene=NDUFS4">https://www.genecards.org/cgi-bin/carddisp.pl?gene=NDUFS4</a>     |
| CXCL10   | C-X-C Motif Chemokine Ligand 10                                       | Protein Coding | 44 | GC04M076021 | 21.67 | <a href="https://www.genecards.org/cgi-bin/carddisp.pl?gene=CXCL10">https://www.genecards.org/cgi-bin/carddisp.pl?gene=CXCL10</a>     |

|          |                                                    |                |    |              |       |                                                                                                                                       |
|----------|----------------------------------------------------|----------------|----|--------------|-------|---------------------------------------------------------------------------------------------------------------------------------------|
| HSPB1    | Heat Shock Protein Family B (Small) Member 1       | Protein Coding | 51 | GC07P076302  | 21.54 | <a href="https://www.genecards.org/cgi-bin/carddisp.pl?gene=HSPB1">https://www.genecards.org/cgi-bin/carddisp.pl?gene=HSPB1</a>       |
| MT-CO1   | Mitochondrially Encoded Cytochrome C Oxidase I     | Protein Coding | 32 | GCMTMP005906 | 21.52 | <a href="https://www.genecards.org/cgi-bin/carddisp.pl?gene=MT-CO1">https://www.genecards.org/cgi-bin/carddisp.pl?gene=MT-CO1</a>     |
| PCSK9    | Proprotein Convertase Subtilisin/Kexin Type 9      | Protein Coding | 51 | GC01P055039  | 21.39 | <a href="https://www.genecards.org/cgi-bin/carddisp.pl?gene=PCSK9">https://www.genecards.org/cgi-bin/carddisp.pl?gene=PCSK9</a>       |
| POMC     | Proopiomelanocortin                                | Protein Coding | 48 | GC02M025160  | 21.37 | <a href="https://www.genecards.org/cgi-bin/carddisp.pl?gene=POMC">https://www.genecards.org/cgi-bin/carddisp.pl?gene=POMC</a>         |
| MIR199A1 | MicroRNA 199a-1                                    | RNA Gene       | 18 | GC19M010792  | 21.3  | <a href="https://www.genecards.org/cgi-bin/carddisp.pl?gene=MIR199A1">https://www.genecards.org/cgi-bin/carddisp.pl?gene=MIR199A1</a> |
| MIR181B1 | MicroRNA 181b-1                                    | RNA Gene       | 19 | GC01M198858  | 21.27 | <a href="https://www.genecards.org/cgi-bin/carddisp.pl?gene=MIR181B1">https://www.genecards.org/cgi-bin/carddisp.pl?gene=MIR181B1</a> |
| LIPC     | Lipase C, Hepatic Type                             | Protein Coding | 44 | GC15P058410  | 21.22 | <a href="https://www.genecards.org/cgi-bin/carddisp.pl?gene=LIPC">https://www.genecards.org/cgi-bin/carddisp.pl?gene=LIPC</a>         |
| PRMT7    | Protein Arginine Methyltransferase 7               | Protein Coding | 44 | GC16P068339  | 21.17 | <a href="https://www.genecards.org/cgi-bin/carddisp.pl?gene=PRMT7">https://www.genecards.org/cgi-bin/carddisp.pl?gene=PRMT7</a>       |
| PRKAG2   | Protein Kinase AMP-Activated Non-Catalytic Subunit | Protein Coding | 50 | GC07M151556  | 20.96 | <a href="https://www.genecards.org/cgi-bin/carddisp.pl?gene=PRKAG2">https://www.genecards.org/cgi-bin/carddisp.pl?gene=PRKAG2</a>     |
| CXCR4    | C-X-C Motif Chemokine Receptor 4                   | Protein Coding | 52 | GC02M136114  | 20.95 | <a href="https://www.genecards.org/cgi-bin/carddisp.pl?gene=CXCR4">https://www.genecards.org/cgi-bin/carddisp.pl?gene=CXCR4</a>       |
| TNFRSF1B | TNF Receptor Superfamily Member 1B                 | Protein Coding | 47 | GC01P012167  | 20.91 | <a href="https://www.genecards.org/cgi-bin/carddisp.pl?gene=TNFRSF1B">https://www.genecards.org/cgi-bin/carddisp.pl?gene=TNFRSF1B</a> |
| SLC2A1   | Solute Carrier Family 2 Member 1                   | Protein Coding | 52 | GC01M042925  | 20.86 | <a href="https://www.genecards.org/cgi-bin/carddisp.pl?gene=SLC2A1">https://www.genecards.org/cgi-bin/carddisp.pl?gene=SLC2A1</a>     |
| NOD2     | Nucleotide Binding Oligomerization Domain Containi | Protein Coding | 48 | GC16P050693  | 20.75 | <a href="https://www.genecards.org/cgi-bin/carddisp.pl?gene=NOD2">https://www.genecards.org/cgi-bin/carddisp.pl?gene=NOD2</a>         |
| THBD     | Thrombomodulin                                     | Protein Coding | 44 | GC20M023026  | 20.7  | <a href="https://www.genecards.org/cgi-bin/carddisp.pl?gene=THBD">https://www.genecards.org/cgi-bin/carddisp.pl?gene=THBD</a>         |
| NAMPT    | Nicotinamide Phosphoribosyltransferase             | Protein Coding | 48 | GC07M106248  | 20.7  | <a href="https://www.genecards.org/cgi-bin/carddisp.pl?gene=NAMPT">https://www.genecards.org/cgi-bin/carddisp.pl?gene=NAMPT</a>       |
| NLRP3    | NLR Family Pyrin Domain Containing 3               | Protein Coding | 47 | GC01P247415  | 20.61 | <a href="https://www.genecards.org/cgi-bin/carddisp.pl?gene=NLRP3">https://www.genecards.org/cgi-bin/carddisp.pl?gene=NLRP3</a>       |
| BMP6     | Bone Morphogenetic Protein 6                       | Protein Coding | 43 | GC06P007726  | 20.56 | <a href="https://www.genecards.org/cgi-bin/carddisp.pl?gene=BMP6">https://www.genecards.org/cgi-bin/carddisp.pl?gene=BMP6</a>         |
| PNPLA2   | Patatin Like Phospholipase Domain Containing 2     | Protein Coding | 44 | GC11P000896  | 20.52 | <a href="https://www.genecards.org/cgi-bin/carddisp.pl?gene=PNPLA2">https://www.genecards.org/cgi-bin/carddisp.pl?gene=PNPLA2</a>     |
| MT-CYB   | Mitochondrially Encoded Cytochrome B               | Protein Coding | 31 | GCMTMP014749 | 20.46 | <a href="https://www.genecards.org/cgi-bin/carddisp.pl?gene=MT-CYB">https://www.genecards.org/cgi-bin/carddisp.pl?gene=MT-CYB</a>     |
| PDGFRB   | Platelet Derived Growth Factor Receptor Beta       | Protein Coding | 55 | GC05M150113  | 20.44 | <a href="https://www.genecards.org/cgi-bin/carddisp.pl?gene=PDGFRB">https://www.genecards.org/cgi-bin/carddisp.pl?gene=PDGFRB</a>     |
| SDHB     | Succinate Dehydrogenase Complex Iron Sulfur Subuni | Protein Coding | 47 | GC01M017020  | 20.44 | <a href="https://www.genecards.org/cgi-bin/carddisp.pl?gene=SDHB">https://www.genecards.org/cgi-bin/carddisp.pl?gene=SDHB</a>         |
| IGF1R    | Insulin Like Growth Factor 1 Receptor              | Protein Coding | 54 | GC15P098648  | 20.4  | <a href="https://www.genecards.org/cgi-bin/carddisp.pl?gene=IGF1R">https://www.genecards.org/cgi-bin/carddisp.pl?gene=IGF1R</a>       |
| NGF      | Nerve Growth Factor                                | Protein Coding | 50 | GC01M115285  | 20.34 | <a href="https://www.genecards.org/cgi-bin/carddisp.pl?gene=NGF">https://www.genecards.org/cgi-bin/carddisp.pl?gene=NGF</a>           |
| CRYAA    | Crystallin Alpha A                                 | Protein Coding | 44 | GC21P043169  | 20.31 | <a href="https://www.genecards.org/cgi-bin/carddisp.pl?gene=CRYAA">https://www.genecards.org/cgi-bin/carddisp.pl?gene=CRYAA</a>       |
| ACTB     | Actin Beta                                         | Protein Coding | 49 | GC07M005527  | 20.28 | <a href="https://www.genecards.org/cgi-bin/carddisp.pl?gene=ACTB">https://www.genecards.org/cgi-bin/carddisp.pl?gene=ACTB</a>         |
| PKLR     | Pyruvate Kinase L/R                                | Protein Coding | 47 | GC01M155289  | 20.22 | <a href="https://www.genecards.org/cgi-bin/carddisp.pl?gene=PKLR">https://www.genecards.org/cgi-bin/carddisp.pl?gene=PKLR</a>         |
| HSPD1    | Heat Shock Protein Family D (Hsp60) Member 1       | Protein Coding | 47 | GC02M197486  | 20.2  | <a href="https://www.genecards.org/cgi-bin/carddisp.pl?gene=HSPD1">https://www.genecards.org/cgi-bin/carddisp.pl?gene=HSPD1</a>       |
| SCD      | Stearoyl-CoA Desaturase                            | Protein Coding | 48 | GC10P100347  | 20.2  | <a href="https://www.genecards.org/cgi-bin/carddisp.pl?gene=SCD">https://www.genecards.org/cgi-bin/carddisp.pl?gene=SCD</a>           |
| BCL2     | BCL2 Apoptosis Regulator                           | Protein Coding | 51 | GC18M063123  | 20.17 | <a href="https://www.genecards.org/cgi-bin/carddisp.pl?gene=BCL2">https://www.genecards.org/cgi-bin/carddisp.pl?gene=BCL2</a>         |
| PTGS2    | Prostaglandin-Endoperoxide Synthase 2              | Protein Coding | 48 | GC01M186640  | 19.98 | <a href="https://www.genecards.org/cgi-bin/carddisp.pl?gene=PTGS2">https://www.genecards.org/cgi-bin/carddisp.pl?gene=PTGS2</a>       |
| TLR9     | Toll Like Receptor 9                               | Protein Coding | 45 | GC03M052222  | 19.95 | <a href="https://www.genecards.org/cgi-bin/carddisp.pl?gene=TLR9">https://www.genecards.org/cgi-bin/carddisp.pl?gene=TLR9</a>         |
| SERPINA3 | Serpin Family A Member 3                           | Protein Coding | 43 | GC14P094612  | 19.8  | <a href="https://www.genecards.org/cgi-bin/carddisp.pl?gene=SERPINA3">https://www.genecards.org/cgi-bin/carddisp.pl?gene=SERPINA3</a> |
| ERN1     | Endoplasmic Reticulum To Nucleus Signaling 1       | Protein Coding | 45 | GC17M064039  | 19.72 | <a href="https://www.genecards.org/cgi-bin/carddisp.pl?gene=ERN1">https://www.genecards.org/cgi-bin/carddisp.pl?gene=ERN1</a>         |
| C3       | Complement C3                                      | Protein Coding | 47 | GC19M006677  | 19.67 | <a href="https://www.genecards.org/cgi-bin/carddisp.pl?gene=C3">https://www.genecards.org/cgi-bin/carddisp.pl?gene=C3</a>             |
| TLR1     | Toll Like Receptor 1                               | Protein Coding | 47 | GC04M038797  | 19.64 | <a href="https://www.genecards.org/cgi-bin/carddisp.pl?gene=TLR1">https://www.genecards.org/cgi-bin/carddisp.pl?gene=TLR1</a>         |
| SDHD     | Succinate Dehydrogenase Complex Subunit D          | Protein Coding | 44 | GC11P112087  | 19.58 | <a href="https://www.genecards.org/cgi-bin/carddisp.pl?gene=SDHD">https://www.genecards.org/cgi-bin/carddisp.pl?gene=SDHD</a>         |
| TGFB2    | Transforming Growth Factor Beta Receptor 2         | Protein Coding | 51 | GC03P030623  | 19.48 | <a href="https://www.genecards.org/cgi-bin/carddisp.pl?gene=TGFB2">https://www.genecards.org/cgi-bin/carddisp.pl?gene=TGFB2</a>       |
| DRD2     | Dopamine Receptor D2                               | Protein Coding | 50 | GC11M113409  | 19.46 | <a href="https://www.genecards.org/cgi-bin/carddisp.pl?gene=DRD2">https://www.genecards.org/cgi-bin/carddisp.pl?gene=DRD2</a>         |
| TLR6     | Toll Like Receptor 6                               | Protein Coding | 44 | GC04M038828  | 19.29 | <a href="https://www.genecards.org/cgi-bin/carddisp.pl?gene=TLR6">https://www.genecards.org/cgi-bin/carddisp.pl?gene=TLR6</a>         |



|         |                                                     |                |    |             |       |                                                                                                                                     |
|---------|-----------------------------------------------------|----------------|----|-------------|-------|-------------------------------------------------------------------------------------------------------------------------------------|
| NDUFS3  | NADH:Ubiquinone Oxidoreductase Core Subunit S3      | Protein Coding | 46 | GC11P047567 | 19.27 | <a href="https://www.genecards.org/cgi-bin/carddisp.pl?gene=NDUFS3">https://www.genecards.org/cgi-bin/carddisp.pl?gene=NDUFS3</a>   |
| CFH     | Complement Factor H                                 | Protein Coding | 45 | GC01P196621 | 19.24 | <a href="https://www.genecards.org/cgi-bin/carddisp.pl?gene=CFH">https://www.genecards.org/cgi-bin/carddisp.pl?gene=CFH</a>         |
| SLC6A3  | Solute Carrier Family 6 Member 3                    | Protein Coding | 49 | GC05M001392 | 19.22 | <a href="https://www.genecards.org/cgi-bin/carddisp.pl?gene=SLC6A3">https://www.genecards.org/cgi-bin/carddisp.pl?gene=SLC6A3</a>   |
| TNFSF11 | TNF Superfamily Member 11                           | Protein Coding | 47 | GC13P042562 | 19.21 | <a href="https://www.genecards.org/cgi-bin/carddisp.pl?gene=TNFSF11">https://www.genecards.org/cgi-bin/carddisp.pl?gene=TNFSF11</a> |
| ENPP1   | Ectonucleotide Pyrophosphatase/Phosphodiesterase 1  | Protein Coding | 47 | GC06P131808 | 19.11 | <a href="https://www.genecards.org/cgi-bin/carddisp.pl?gene=ENPP1">https://www.genecards.org/cgi-bin/carddisp.pl?gene=ENPP1</a>     |
| MIR146A | MicroRNA 146a                                       | RNA Gene       | 22 | GC05P160485 | 18.96 | <a href="https://www.genecards.org/cgi-bin/carddisp.pl?gene=MIR146A">https://www.genecards.org/cgi-bin/carddisp.pl?gene=MIR146A</a> |
| LIPE    | Lipase E, Hormone Sensitive Type                    | Protein Coding | 47 | GC19M042401 | 18.95 | <a href="https://www.genecards.org/cgi-bin/carddisp.pl?gene=LIPE">https://www.genecards.org/cgi-bin/carddisp.pl?gene=LIPE</a>       |
| UGT1A1  | UDP Glucuronosyltransferase Family 1 Member A1      | Protein Coding | 48 | GC02P233760 | 18.9  | <a href="https://www.genecards.org/cgi-bin/carddisp.pl?gene=UGT1A1">https://www.genecards.org/cgi-bin/carddisp.pl?gene=UGT1A1</a>   |
| FGF19   | Fibroblast Growth Factor 19                         | Protein Coding | 44 | GC11M069699 | 18.86 | <a href="https://www.genecards.org/cgi-bin/carddisp.pl?gene=FGF19">https://www.genecards.org/cgi-bin/carddisp.pl?gene=FGF19</a>     |
| NDUFS2  | NADH:Ubiquinone Oxidoreductase Core Subunit S2      | Protein Coding | 44 | GC01P161197 | 18.7  | <a href="https://www.genecards.org/cgi-bin/carddisp.pl?gene=NDUFS2">https://www.genecards.org/cgi-bin/carddisp.pl?gene=NDUFS2</a>   |
| AGPAT2  | 1-Acylglycerol-3-Phosphate O-Acyltransferase 2      | Protein Coding | 45 | GC09M136673 | 18.68 | <a href="https://www.genecards.org/cgi-bin/carddisp.pl?gene=AGPAT2">https://www.genecards.org/cgi-bin/carddisp.pl?gene=AGPAT2</a>   |
| MDM2    | MDM2 Proto-Oncogene                                 | Protein Coding | 52 | GC12P068808 | 18.67 | <a href="https://www.genecards.org/cgi-bin/carddisp.pl?gene=MDM2">https://www.genecards.org/cgi-bin/carddisp.pl?gene=MDM2</a>       |
| CCL3    | C-C Motif Chemokine Ligand 3                        | Protein Coding | 39 | GC17M036088 | 18.58 | <a href="https://www.genecards.org/cgi-bin/carddisp.pl?gene=CCL3">https://www.genecards.org/cgi-bin/carddisp.pl?gene=CCL3</a>       |
| ABCB7   | ATP Binding Cassette Subfamily B Member 7           | Protein Coding | 43 | GC0XM075053 | 18.58 | <a href="https://www.genecards.org/cgi-bin/carddisp.pl?gene=ABCB7">https://www.genecards.org/cgi-bin/carddisp.pl?gene=ABCB7</a>     |
| DNMT1   | DNA Methyltransferase 1                             | Protein Coding | 50 | GC19M010133 | 18.55 | <a href="https://www.genecards.org/cgi-bin/carddisp.pl?gene=DNMT1">https://www.genecards.org/cgi-bin/carddisp.pl?gene=DNMT1</a>     |
| NDUFB8  | NADH:Ubiquinone Oxidoreductase Subunit B8           | Protein Coding | 43 | GC10M100523 | 18.54 | <a href="https://www.genecards.org/cgi-bin/carddisp.pl?gene=NDUFB8">https://www.genecards.org/cgi-bin/carddisp.pl?gene=NDUFB8</a>   |
| DNAJB11 | DnaJ Heat Shock Protein Family (Hsp40) Member B11   | Protein Coding | 40 | GC03P186567 | 18.46 | <a href="https://www.genecards.org/cgi-bin/carddisp.pl?gene=DNAJB11">https://www.genecards.org/cgi-bin/carddisp.pl?gene=DNAJB11</a> |
| SDHC    | Succinate Dehydrogenase Complex Subunit C           | Protein Coding | 44 | GC01P161314 | 18.41 | <a href="https://www.genecards.org/cgi-bin/carddisp.pl?gene=SDHC">https://www.genecards.org/cgi-bin/carddisp.pl?gene=SDHC</a>       |
| CDK4    | Cyclin Dependent Kinase 4                           | Protein Coding | 54 | GC12M057743 | 18.36 | <a href="https://www.genecards.org/cgi-bin/carddisp.pl?gene=CDK4">https://www.genecards.org/cgi-bin/carddisp.pl?gene=CDK4</a>       |
| FLT1    | Fms Related Receptor Tyrosine Kinase 1              | Protein Coding | 51 | GC13M028300 | 18.29 | <a href="https://www.genecards.org/cgi-bin/carddisp.pl?gene=FLT1">https://www.genecards.org/cgi-bin/carddisp.pl?gene=FLT1</a>       |
| ASS1    | Argininosuccinate Synthase 1                        | Protein Coding | 48 | GC09P130444 | 18.18 | <a href="https://www.genecards.org/cgi-bin/carddisp.pl?gene=ASS1">https://www.genecards.org/cgi-bin/carddisp.pl?gene=ASS1</a>       |
| LPA     | Lipoprotein(A)                                      | Protein Coding | 41 | GC06M160531 | 18.16 | <a href="https://www.genecards.org/cgi-bin/carddisp.pl?gene=LPA">https://www.genecards.org/cgi-bin/carddisp.pl?gene=LPA</a>         |
| SLC6A4  | Solute Carrier Family 6 Member 4                    | Protein Coding | 47 | GC17M030194 | 18.16 | <a href="https://www.genecards.org/cgi-bin/carddisp.pl?gene=SLC6A4">https://www.genecards.org/cgi-bin/carddisp.pl?gene=SLC6A4</a>   |
| SDHA    | Succinate Dehydrogenase Complex Flavoprotein Subu   | Protein Coding | 46 | GC05P000208 | 18.09 | <a href="https://www.genecards.org/cgi-bin/carddisp.pl?gene=SDHA">https://www.genecards.org/cgi-bin/carddisp.pl?gene=SDHA</a>       |
| FN1     | Fibronectin 1                                       | Protein Coding | 50 | GC02M215360 | 18.05 | <a href="https://www.genecards.org/cgi-bin/carddisp.pl?gene=FN1">https://www.genecards.org/cgi-bin/carddisp.pl?gene=FN1</a>         |
| IFNA1   | Interferon Alpha 1                                  | Protein Coding | 39 | GC09P021494 | 17.95 | <a href="https://www.genecards.org/cgi-bin/carddisp.pl?gene=IFNA1">https://www.genecards.org/cgi-bin/carddisp.pl?gene=IFNA1</a>     |
| PRKAB1  | Protein Kinase AMP-Activated Non-Catalytic Subunit  | Protein Coding | 47 | GC12P119632 | 17.87 | <a href="https://www.genecards.org/cgi-bin/carddisp.pl?gene=PRKAB1">https://www.genecards.org/cgi-bin/carddisp.pl?gene=PRKAB1</a>   |
| PRKAA1  | Protein Kinase AMP-Activated Catalytic Subunit Alph | Protein Coding | 47 | GC05M040759 | 17.74 | <a href="https://www.genecards.org/cgi-bin/carddisp.pl?gene=PRKAA1">https://www.genecards.org/cgi-bin/carddisp.pl?gene=PRKAA1</a>   |
| NDUFV1  | NADH:Ubiquinone Oxidoreductase Core Subunit V1      | Protein Coding | 45 | GC11P067632 | 17.65 | <a href="https://www.genecards.org/cgi-bin/carddisp.pl?gene=NDUFV1">https://www.genecards.org/cgi-bin/carddisp.pl?gene=NDUFV1</a>   |
| NDUFS7  | NADH:Ubiquinone Oxidoreductase Core Subunit S7      | Protein Coding | 46 | GC19P001490 | 17.63 | <a href="https://www.genecards.org/cgi-bin/carddisp.pl?gene=NDUFS7">https://www.genecards.org/cgi-bin/carddisp.pl?gene=NDUFS7</a>   |
| CTSD    | Cathepsin D                                         | Protein Coding | 52 | GC11M001752 | 17.61 | <a href="https://www.genecards.org/cgi-bin/carddisp.pl?gene=CTSD">https://www.genecards.org/cgi-bin/carddisp.pl?gene=CTSD</a>       |
| CDKN3   | Cyclin Dependent Kinase Inhibitor 3                 | Protein Coding | 42 | GC14P054398 | 17.57 | <a href="https://www.genecards.org/cgi-bin/carddisp.pl?gene=CDKN3">https://www.genecards.org/cgi-bin/carddisp.pl?gene=CDKN3</a>     |
| APOA5   | Apolipoprotein A5                                   | Protein Coding | 44 | GC11M116789 | 17.55 | <a href="https://www.genecards.org/cgi-bin/carddisp.pl?gene=APOA5">https://www.genecards.org/cgi-bin/carddisp.pl?gene=APOA5</a>     |
| IL17A   | Interleukin 17A                                     | Protein Coding | 42 | GC06P052186 | 17.52 | <a href="https://www.genecards.org/cgi-bin/carddisp.pl?gene=IL17A">https://www.genecards.org/cgi-bin/carddisp.pl?gene=IL17A</a>     |
| TARDBP  | TAR DNA Binding Protein                             | Protein Coding | 45 | GC01P011013 | 17.46 | <a href="https://www.genecards.org/cgi-bin/carddisp.pl?gene=TARDBP">https://www.genecards.org/cgi-bin/carddisp.pl?gene=TARDBP</a>   |
| CYP7A1  | Cytochrome P450 Family 7 Subfamily A Member 1       | Protein Coding | 42 | GC08M058476 | 17.44 | <a href="https://www.genecards.org/cgi-bin/carddisp.pl?gene=CYP7A1">https://www.genecards.org/cgi-bin/carddisp.pl?gene=CYP7A1</a>   |
| GRN     | Granulin Precursor                                  | Protein Coding | 47 | GC17P044345 | 17.41 | <a href="https://www.genecards.org/cgi-bin/carddisp.pl?gene=GRN">https://www.genecards.org/cgi-bin/carddisp.pl?gene=GRN</a>         |
| AKT3    | AKT Serine/Threonine Kinase 3                       | Protein Coding | 52 | GC01M243488 | 17.36 | <a href="https://www.genecards.org/cgi-bin/carddisp.pl?gene=AKT3">https://www.genecards.org/cgi-bin/carddisp.pl?gene=AKT3</a>       |
| CASR    | Calcium Sensing Receptor                            | Protein Coding | 50 | GC03P122183 | 17.35 | <a href="https://www.genecards.org/cgi-bin/carddisp.pl?gene=CASR">https://www.genecards.org/cgi-bin/carddisp.pl?gene=CASR</a>       |

|          |                                                     |                |    |              |       |                                                                                                                                       |
|----------|-----------------------------------------------------|----------------|----|--------------|-------|---------------------------------------------------------------------------------------------------------------------------------------|
| PLAU     | Plasminogen Activator, Urokinase                    | Protein Coding | 51 | GC10P073909  | 17.32 | <a href="https://www.genecards.org/cgi-bin/carddisp.pl?gene=PLAU">https://www.genecards.org/cgi-bin/carddisp.pl?gene=PLAU</a>         |
| GCK      | Glucokinase                                         | Protein Coding | 50 | GC07M044145  | 17.2  | <a href="https://www.genecards.org/cgi-bin/carddisp.pl?gene=GCK">https://www.genecards.org/cgi-bin/carddisp.pl?gene=GCK</a>           |
| KRT8     | Keratin 8                                           | Protein Coding | 47 | GC12M052897  | 17.15 | <a href="https://www.genecards.org/cgi-bin/carddisp.pl?gene=KRT8">https://www.genecards.org/cgi-bin/carddisp.pl?gene=KRT8</a>         |
| ANO5     | Anoctamin 5                                         | Protein Coding | 38 | GC11P021799  | 17.13 | <a href="https://www.genecards.org/cgi-bin/carddisp.pl?gene=ANO5">https://www.genecards.org/cgi-bin/carddisp.pl?gene=ANO5</a>         |
| TGFBR1   | Transforming Growth Factor Beta Receptor 1          | Protein Coding | 52 | GC09P099104  | 17.12 | <a href="https://www.genecards.org/cgi-bin/carddisp.pl?gene=TGFBR1">https://www.genecards.org/cgi-bin/carddisp.pl?gene=TGFBR1</a>     |
| EZH2     | Enhancer Of Zeste 2 Polycomb Repressive Complex 2   | Protein Coding | 54 | GC07M148807  | 17.09 | <a href="https://www.genecards.org/cgi-bin/carddisp.pl?gene=EZH2">https://www.genecards.org/cgi-bin/carddisp.pl?gene=EZH2</a>         |
| IFIH1    | Interferon Induced With Helicase C Domain 1         | Protein Coding | 47 | GC02M162267  | 16.93 | <a href="https://www.genecards.org/cgi-bin/carddisp.pl?gene=IFIH1">https://www.genecards.org/cgi-bin/carddisp.pl?gene=IFIH1</a>       |
| MT-CO2   | Mitochondrially Encoded Cytochrome C Oxidase II     | Protein Coding | 32 | GCMTTP007587 | 16.92 | <a href="https://www.genecards.org/cgi-bin/carddisp.pl?gene=MT-CO2">https://www.genecards.org/cgi-bin/carddisp.pl?gene=MT-CO2</a>     |
| PC       | Pyruvate Carboxylase                                | Protein Coding | 47 | GC11M066848  | 16.83 | <a href="https://www.genecards.org/cgi-bin/carddisp.pl?gene=PC">https://www.genecards.org/cgi-bin/carddisp.pl?gene=PC</a>             |
| XDH      | Xanthine Dehydrogenase                              | Protein Coding | 47 | GC02M031294  | 16.82 | <a href="https://www.genecards.org/cgi-bin/carddisp.pl?gene=XDH">https://www.genecards.org/cgi-bin/carddisp.pl?gene=XDH</a>           |
| ALMS1    | ALMS1 Centrosome And Basal Body Associated Prote    | Protein Coding | 41 | GC02P073385  | 16.78 | <a href="https://www.genecards.org/cgi-bin/carddisp.pl?gene=ALMS1">https://www.genecards.org/cgi-bin/carddisp.pl?gene=ALMS1</a>       |
| MYD88    | MYD88 Innate Immune Signal Transduction Adaptor     | Protein Coding | 50 | GC03P038179  | 16.75 | <a href="https://www.genecards.org/cgi-bin/carddisp.pl?gene=MYD88">https://www.genecards.org/cgi-bin/carddisp.pl?gene=MYD88</a>       |
| GSR      | Glutathione-Disulfide Reductase                     | Protein Coding | 48 | GC08M030678  | 16.67 | <a href="https://www.genecards.org/cgi-bin/carddisp.pl?gene=GSR">https://www.genecards.org/cgi-bin/carddisp.pl?gene=GSR</a>           |
| FABP2    | Fatty Acid Binding Protein 2                        | Protein Coding | 43 | GC04M119317  | 16.57 | <a href="https://www.genecards.org/cgi-bin/carddisp.pl?gene=FABP2">https://www.genecards.org/cgi-bin/carddisp.pl?gene=FABP2</a>       |
| NDUFV2   | NADH:Ubiquinone Oxidoreductase Core Subunit V2      | Protein Coding | 44 | GC18P009092  | 16.51 | <a href="https://www.genecards.org/cgi-bin/carddisp.pl?gene=NDUFV2">https://www.genecards.org/cgi-bin/carddisp.pl?gene=NDUFV2</a>     |
| MIR195   | MicroRNA 195                                        | RNA Gene       | 19 | GC17M007018  | 16.44 | <a href="https://www.genecards.org/cgi-bin/carddisp.pl?gene=MIR195">https://www.genecards.org/cgi-bin/carddisp.pl?gene=MIR195</a>     |
| GH1      | Growth Hormone 1                                    | Protein Coding | 44 | GC17M063917  | 16.43 | <a href="https://www.genecards.org/cgi-bin/carddisp.pl?gene=GH1">https://www.genecards.org/cgi-bin/carddisp.pl?gene=GH1</a>           |
| MIR151A  | MicroRNA 151a                                       | RNA Gene       | 17 | GC08M140733  | 16.43 | <a href="https://www.genecards.org/cgi-bin/carddisp.pl?gene=MIR151A">https://www.genecards.org/cgi-bin/carddisp.pl?gene=MIR151A</a>   |
| CHUK     | Component Of Inhibitor Of Nuclear Factor Kappa B K  | Protein Coding | 52 | GC10M100188  | 16.32 | <a href="https://www.genecards.org/cgi-bin/carddisp.pl?gene=CHUK">https://www.genecards.org/cgi-bin/carddisp.pl?gene=CHUK</a>         |
| HBB      | Hemoglobin Subunit Beta                             | Protein Coding | 45 | GC11M005352  | 16.3  | <a href="https://www.genecards.org/cgi-bin/carddisp.pl?gene=HBB">https://www.genecards.org/cgi-bin/carddisp.pl?gene=HBB</a>           |
| SMARCA4  | SWI/SNF Related, Matrix Associated, Actin Depend    | Protein Coding | 50 | GC19P010932  | 16.28 | <a href="https://www.genecards.org/cgi-bin/carddisp.pl?gene=SMARCA4">https://www.genecards.org/cgi-bin/carddisp.pl?gene=SMARCA4</a>   |
| CYP1A1   | Cytochrome P450 Family 1 Subfamily A Member 1       | Protein Coding | 47 | GC15M074719  | 16.27 | <a href="https://www.genecards.org/cgi-bin/carddisp.pl?gene=CYP1A1">https://www.genecards.org/cgi-bin/carddisp.pl?gene=CYP1A1</a>     |
| SIRT3    | Sirtuin 3                                           | Protein Coding | 48 | GC11M000215  | 16.26 | <a href="https://www.genecards.org/cgi-bin/carddisp.pl?gene=SIRT3">https://www.genecards.org/cgi-bin/carddisp.pl?gene=SIRT3</a>       |
| CCL4     | C-C Motif Chemokine Ligand 4                        | Protein Coding | 40 | GC17P036103  | 16.21 | <a href="https://www.genecards.org/cgi-bin/carddisp.pl?gene=CCL4">https://www.genecards.org/cgi-bin/carddisp.pl?gene=CCL4</a>         |
| FOS      | Fos Proto-Oncogene, AP-1 Transcription Factor Subun | Protein Coding | 50 | GC14P075278  | 16.19 | <a href="https://www.genecards.org/cgi-bin/carddisp.pl?gene=FOS">https://www.genecards.org/cgi-bin/carddisp.pl?gene=FOS</a>           |
| NDUFA13  | NADH:Ubiquinone Oxidoreductase Subunit A13          | Protein Coding | 44 | GC19P019515  | 16.07 | <a href="https://www.genecards.org/cgi-bin/carddisp.pl?gene=NDUFA13">https://www.genecards.org/cgi-bin/carddisp.pl?gene=NDUFA13</a>   |
| MEG3     | Maternally Expressed 3                              | RNA Gene       | 29 | GC14P104771  | 16.05 | <a href="https://www.genecards.org/cgi-bin/carddisp.pl?gene=MEG3">https://www.genecards.org/cgi-bin/carddisp.pl?gene=MEG3</a>         |
| MIR20A   | MicroRNA 20a                                        | RNA Gene       | 19 | GC13P091434  | 16.05 | <a href="https://www.genecards.org/cgi-bin/carddisp.pl?gene=MIR20A">https://www.genecards.org/cgi-bin/carddisp.pl?gene=MIR20A</a>     |
| FGF23    | Fibroblast Growth Factor 23                         | Protein Coding | 45 | GC12M004368  | 16    | <a href="https://www.genecards.org/cgi-bin/carddisp.pl?gene=FGF23">https://www.genecards.org/cgi-bin/carddisp.pl?gene=FGF23</a>       |
| EP300    | E1A Binding Protein P300                            | Protein Coding | 50 | GC22P041091  | 15.96 | <a href="https://www.genecards.org/cgi-bin/carddisp.pl?gene=EP300">https://www.genecards.org/cgi-bin/carddisp.pl?gene=EP300</a>       |
| PIK3R2   | Phosphoinositide-3-Kinase Regulatory Subunit 2      | Protein Coding | 49 | GC19P018153  | 15.93 | <a href="https://www.genecards.org/cgi-bin/carddisp.pl?gene=PIK3R2">https://www.genecards.org/cgi-bin/carddisp.pl?gene=PIK3R2</a>     |
| NDUFA9   | NADH:Ubiquinone Oxidoreductase Subunit A9           | Protein Coding | 43 | GC12P004649  | 15.86 | <a href="https://www.genecards.org/cgi-bin/carddisp.pl?gene=NDUFA9">https://www.genecards.org/cgi-bin/carddisp.pl?gene=NDUFA9</a>     |
| NDUFB9   | NADH:Ubiquinone Oxidoreductase Subunit B9           | Protein Coding | 44 | GC08P124539  | 15.85 | <a href="https://www.genecards.org/cgi-bin/carddisp.pl?gene=NDUFB9">https://www.genecards.org/cgi-bin/carddisp.pl?gene=NDUFB9</a>     |
| MIR181A1 | MicroRNA 181a-1                                     | RNA Gene       | 18 | GC01M198860  | 15.84 | <a href="https://www.genecards.org/cgi-bin/carddisp.pl?gene=MIR181A1">https://www.genecards.org/cgi-bin/carddisp.pl?gene=MIR181A1</a> |
| NDUFA6   | NADH:Ubiquinone Oxidoreductase Subunit A6           | Protein Coding | 44 | GC22M042085  | 15.84 | <a href="https://www.genecards.org/cgi-bin/carddisp.pl?gene=NDUFA6">https://www.genecards.org/cgi-bin/carddisp.pl?gene=NDUFA6</a>     |
| VDR      | Vitamin D Receptor                                  | Protein Coding | 51 | GC12M047841  | 15.83 | <a href="https://www.genecards.org/cgi-bin/carddisp.pl?gene=VDR">https://www.genecards.org/cgi-bin/carddisp.pl?gene=VDR</a>           |
| LOX      | Lysyl Oxidase                                       | Protein Coding | 44 | GC05M122063  | 15.82 | <a href="https://www.genecards.org/cgi-bin/carddisp.pl?gene=LOX">https://www.genecards.org/cgi-bin/carddisp.pl?gene=LOX</a>           |
| CTSB     | Cathepsin B                                         | Protein Coding | 51 | GC08M011842  | 15.81 | <a href="https://www.genecards.org/cgi-bin/carddisp.pl?gene=CTSB">https://www.genecards.org/cgi-bin/carddisp.pl?gene=CTSB</a>         |
| GSK3B    | Glycogen Synthase Kinase 3 Beta                     | Protein Coding | 50 | GC03M119821  | 15.79 | <a href="https://www.genecards.org/cgi-bin/carddisp.pl?gene=GSK3B">https://www.genecards.org/cgi-bin/carddisp.pl?gene=GSK3B</a>       |

|         |                                                                       |                |    |              |       |                                                                                                                                     |
|---------|-----------------------------------------------------------------------|----------------|----|--------------|-------|-------------------------------------------------------------------------------------------------------------------------------------|
| AKR1D1  | Aldo-Keto Reductase Family 1 Member D1                                | Protein Coding | 46 | GC07P138003  | 15.78 | <a href="https://www.genecards.org/cgi-bin/carddisp.pl?gene=AKR1D1">https://www.genecards.org/cgi-bin/carddisp.pl?gene=AKR1D1</a>   |
| IDH1    | Isocitrate Dehydrogenase (NADP(+)) 1                                  | Protein Coding | 52 | GC02M208236  | 15.76 | <a href="https://www.genecards.org/cgi-bin/carddisp.pl?gene=IDH1">https://www.genecards.org/cgi-bin/carddisp.pl?gene=IDH1</a>       |
| NR1H2   | Nuclear Receptor Subfamily 1 Group H Member 2                         | Protein Coding | 48 | GC19P050329  | 15.76 | <a href="https://www.genecards.org/cgi-bin/carddisp.pl?gene=NR1H2">https://www.genecards.org/cgi-bin/carddisp.pl?gene=NR1H2</a>     |
| MIR144  | MicroRNA 144                                                          | RNA Gene       | 16 | GC17M029965  | 15.73 | <a href="https://www.genecards.org/cgi-bin/carddisp.pl?gene=MIR144">https://www.genecards.org/cgi-bin/carddisp.pl?gene=MIR144</a>   |
| F3      | Coagulation Factor III, Tissue Factor                                 | Protein Coding | 45 | GC01M094530  | 15.71 | <a href="https://www.genecards.org/cgi-bin/carddisp.pl?gene=F3">https://www.genecards.org/cgi-bin/carddisp.pl?gene=F3</a>           |
| MIR222  | MicroRNA 222                                                          | RNA Gene       | 21 | GC0XM045747  | 15.71 | <a href="https://www.genecards.org/cgi-bin/carddisp.pl?gene=MIR222">https://www.genecards.org/cgi-bin/carddisp.pl?gene=MIR222</a>   |
| RAC1    | Rac Family Small GTPase 1                                             | Protein Coding | 49 | GC07P006380  | 15.69 | <a href="https://www.genecards.org/cgi-bin/carddisp.pl?gene=RAC1">https://www.genecards.org/cgi-bin/carddisp.pl?gene=RAC1</a>       |
| GARS1   | Glycyl-TRNA Synthetase 1                                              | Protein Coding | 36 | GC07P030595  | 15.64 | <a href="https://www.genecards.org/cgi-bin/carddisp.pl?gene=GARS1">https://www.genecards.org/cgi-bin/carddisp.pl?gene=GARS1</a>     |
| COX5A   | Cytochrome C Oxidase Subunit 5A                                       | Protein Coding | 43 | GC15M074919  | 15.51 | <a href="https://www.genecards.org/cgi-bin/carddisp.pl?gene=COX5A">https://www.genecards.org/cgi-bin/carddisp.pl?gene=COX5A</a>     |
| MIR221  | MicroRNA 221                                                          | RNA Gene       | 20 | GC0XM045746  | 15.44 | <a href="https://www.genecards.org/cgi-bin/carddisp.pl?gene=MIR221">https://www.genecards.org/cgi-bin/carddisp.pl?gene=MIR221</a>   |
| APOA2   | Apolipoprotein A2                                                     | Protein Coding | 44 | GC01M161222  | 15.41 | <a href="https://www.genecards.org/cgi-bin/carddisp.pl?gene=APOA2">https://www.genecards.org/cgi-bin/carddisp.pl?gene=APOA2</a>     |
| NDUFA2  | NADH:Ubiquinone Oxidoreductase Subunit A2                             | Protein Coding | 42 | GC05M140640  | 15.31 | <a href="https://www.genecards.org/cgi-bin/carddisp.pl?gene=NDUFA2">https://www.genecards.org/cgi-bin/carddisp.pl?gene=NDUFA2</a>   |
| MT-ND6  | Mitochondrially Encoded NADH:Ubiquinone Oxidoreductase Core Subunit 6 | Protein Coding | 32 | GCMTM014151  | 15.22 | <a href="https://www.genecards.org/cgi-bin/carddisp.pl?gene=MT-ND6">https://www.genecards.org/cgi-bin/carddisp.pl?gene=MT-ND6</a>   |
| CDH2    | Cadherin 2                                                            | Protein Coding | 50 | GC18M027950  | 15.2  | <a href="https://www.genecards.org/cgi-bin/carddisp.pl?gene=CDH2">https://www.genecards.org/cgi-bin/carddisp.pl?gene=CDH2</a>       |
| HTR2A   | 5-Hydroxytryptamine Receptor 2A                                       | Protein Coding | 47 | GC13M046831  | 15.2  | <a href="https://www.genecards.org/cgi-bin/carddisp.pl?gene=HTR2A">https://www.genecards.org/cgi-bin/carddisp.pl?gene=HTR2A</a>     |
| PLIN1   | Perilipin 1                                                           | Protein Coding | 44 | GC15M089664  | 15.13 | <a href="https://www.genecards.org/cgi-bin/carddisp.pl?gene=PLIN1">https://www.genecards.org/cgi-bin/carddisp.pl?gene=PLIN1</a>     |
| CRAT    | Carnitine O-Acetyltransferase                                         | Protein Coding | 44 | GC09M129094  | 15.08 | <a href="https://www.genecards.org/cgi-bin/carddisp.pl?gene=CRAT">https://www.genecards.org/cgi-bin/carddisp.pl?gene=CRAT</a>       |
| MT-CO3  | Mitochondrially Encoded Cytochrome C Oxidase III                      | Protein Coding | 30 | GCMTMP009209 | 15.08 | <a href="https://www.genecards.org/cgi-bin/carddisp.pl?gene=MT-CO3">https://www.genecards.org/cgi-bin/carddisp.pl?gene=MT-CO3</a>   |
| PIK3CD  | Phosphatidylinositol-4,5-Bisphosphate 3-Kinase Catalytic Subunit      | Protein Coding | 53 | GC01P009629  | 15.07 | <a href="https://www.genecards.org/cgi-bin/carddisp.pl?gene=PIK3CD">https://www.genecards.org/cgi-bin/carddisp.pl?gene=PIK3CD</a>   |
| TNFAIP3 | TNF Alpha Induced Protein 3                                           | Protein Coding | 48 | GC06P137866  | 15.05 | <a href="https://www.genecards.org/cgi-bin/carddisp.pl?gene=TNFAIP3">https://www.genecards.org/cgi-bin/carddisp.pl?gene=TNFAIP3</a> |
| EIF2S1  | Eukaryotic Translation Initiation Factor 2 Subunit Alpha              | Protein Coding | 44 | GC14P067359  | 14.99 | <a href="https://www.genecards.org/cgi-bin/carddisp.pl?gene=EIF2S1">https://www.genecards.org/cgi-bin/carddisp.pl?gene=EIF2S1</a>   |
| NDUFS8  | NADH:Ubiquinone Oxidoreductase Core Subunit S8                        | Protein Coding | 45 | GC11P068030  | 14.98 | <a href="https://www.genecards.org/cgi-bin/carddisp.pl?gene=NDUFS8">https://www.genecards.org/cgi-bin/carddisp.pl?gene=NDUFS8</a>   |
| MIR214  | MicroRNA 214                                                          | RNA Gene       | 20 | GC01M172234  | 14.95 | <a href="https://www.genecards.org/cgi-bin/carddisp.pl?gene=MIR214">https://www.genecards.org/cgi-bin/carddisp.pl?gene=MIR214</a>   |
| CPOX    | Coproporphyrinogen Oxidase                                            | Protein Coding | 43 | GC03M098576  | 14.82 | <a href="https://www.genecards.org/cgi-bin/carddisp.pl?gene=CPOX">https://www.genecards.org/cgi-bin/carddisp.pl?gene=CPOX</a>       |
| MIR27B  | MicroRNA 27b                                                          | RNA Gene       | 21 | GC09P095097  | 14.78 | <a href="https://www.genecards.org/cgi-bin/carddisp.pl?gene=MIR27B">https://www.genecards.org/cgi-bin/carddisp.pl?gene=MIR27B</a>   |
| CDC42   | Cell Division Cycle 42                                                | Protein Coding | 51 | GC01P022057  | 14.77 | <a href="https://www.genecards.org/cgi-bin/carddisp.pl?gene=CDC42">https://www.genecards.org/cgi-bin/carddisp.pl?gene=CDC42</a>     |
| SLC40A1 | Solute Carrier Family 40 Member 1                                     | Protein Coding | 46 | GC02M189560  | 14.76 | <a href="https://www.genecards.org/cgi-bin/carddisp.pl?gene=SLC40A1">https://www.genecards.org/cgi-bin/carddisp.pl?gene=SLC40A1</a> |
| GSTM1   | Glutathione S-Transferase Mu 1                                        | Protein Coding | 41 | GC01P109687  | 14.72 | <a href="https://www.genecards.org/cgi-bin/carddisp.pl?gene=GSTM1">https://www.genecards.org/cgi-bin/carddisp.pl?gene=GSTM1</a>     |
| CYP1A2  | Cytochrome P450 Family 1 Subfamily A Member 2                         | Protein Coding | 45 | GC15P074748  | 14.63 | <a href="https://www.genecards.org/cgi-bin/carddisp.pl?gene=CYP1A2">https://www.genecards.org/cgi-bin/carddisp.pl?gene=CYP1A2</a>   |
| GSTP1   | Glutathione S-Transferase Pi 1                                        | Protein Coding | 50 | GC11P067583  | 14.62 | <a href="https://www.genecards.org/cgi-bin/carddisp.pl?gene=GSTP1">https://www.genecards.org/cgi-bin/carddisp.pl?gene=GSTP1</a>     |
| HIF1A   | Hypoxia Inducible Factor 1 Subunit Alpha                              | Protein Coding | 47 | GC14P061695  | 14.6  | <a href="https://www.genecards.org/cgi-bin/carddisp.pl?gene=HIF1A">https://www.genecards.org/cgi-bin/carddisp.pl?gene=HIF1A</a>     |
| SPINK1  | Serine Peptidase Inhibitor Kazal Type 1                               | Protein Coding | 43 | GC05M147825  | 14.55 | <a href="https://www.genecards.org/cgi-bin/carddisp.pl?gene=SPINK1">https://www.genecards.org/cgi-bin/carddisp.pl?gene=SPINK1</a>   |
| CCL5    | C-C Motif Chemokine Ligand 5                                          | Protein Coding | 43 | GC17M035871  | 14.52 | <a href="https://www.genecards.org/cgi-bin/carddisp.pl?gene=CCL5">https://www.genecards.org/cgi-bin/carddisp.pl?gene=CCL5</a>       |
| SUMF1   | Sulfatase Modifying Factor 1                                          | Protein Coding | 43 | GC03M003700  | 14.48 | <a href="https://www.genecards.org/cgi-bin/carddisp.pl?gene=SUMF1">https://www.genecards.org/cgi-bin/carddisp.pl?gene=SUMF1</a>     |
| NDUFA1  | NADH:Ubiquinone Oxidoreductase Subunit A1                             | Protein Coding | 44 | GC0XP119871  | 14.44 | <a href="https://www.genecards.org/cgi-bin/carddisp.pl?gene=NDUFA1">https://www.genecards.org/cgi-bin/carddisp.pl?gene=NDUFA1</a>   |
| AGTR1   | Angiotensin II Receptor Type 1                                        | Protein Coding | 51 | GC03P148697  | 14.42 | <a href="https://www.genecards.org/cgi-bin/carddisp.pl?gene=AGTR1">https://www.genecards.org/cgi-bin/carddisp.pl?gene=AGTR1</a>     |
| CHI3L1  | Chitinase 3 Like 1                                                    | Protein Coding | 43 | GC01M203148  | 14.39 | <a href="https://www.genecards.org/cgi-bin/carddisp.pl?gene=CHI3L1">https://www.genecards.org/cgi-bin/carddisp.pl?gene=CHI3L1</a>   |
| CYBB    | Cytochrome B-245 Beta Chain                                           | Protein Coding | 47 | GC0XP037780  | 14.36 | <a href="https://www.genecards.org/cgi-bin/carddisp.pl?gene=CYBB">https://www.genecards.org/cgi-bin/carddisp.pl?gene=CYBB</a>       |
| NDUFB11 | NADH:Ubiquinone Oxidoreductase Subunit B11                            | Protein Coding | 39 | GC0XM047142  | 14.35 | <a href="https://www.genecards.org/cgi-bin/carddisp.pl?gene=NDUFB11">https://www.genecards.org/cgi-bin/carddisp.pl?gene=NDUFB11</a> |

|           |                                                       |                |    |             |                                                                                                                                               |
|-----------|-------------------------------------------------------|----------------|----|-------------|-----------------------------------------------------------------------------------------------------------------------------------------------|
| SMAD7     | SMAD Family Member 7                                  | Protein Coding | 43 | GC18M048919 | 14.34 <a href="https://www.genecards.org/cgi-bin/carddisp.pl?gene=SMAD7">https://www.genecards.org/cgi-bin/carddisp.pl?gene=SMAD7</a>         |
| NDUFS6    | NADH:Ubiquinone Oxidoreductase Subunit S6             | Protein Coding | 43 | GC05P001801 | 14.3 <a href="https://www.genecards.org/cgi-bin/carddisp.pl?gene=NDUFS6">https://www.genecards.org/cgi-bin/carddisp.pl?gene=NDUFS6</a>        |
| COX6B1    | Cytochrome C Oxidase Subunit 6B1                      | Protein Coding | 43 | GC19P038224 | 14.25 <a href="https://www.genecards.org/cgi-bin/carddisp.pl?gene=COX6B1">https://www.genecards.org/cgi-bin/carddisp.pl?gene=COX6B1</a>       |
| BGLAP     | Bone Gamma-Carboxyglutamate Protein                   | Protein Coding | 40 | GC01P156242 | 14.23 <a href="https://www.genecards.org/cgi-bin/carddisp.pl?gene=BGLAP">https://www.genecards.org/cgi-bin/carddisp.pl?gene=BGLAP</a>         |
| CHIT1     | Chitinase 1                                           | Protein Coding | 43 | GC01M203181 | 14.22 <a href="https://www.genecards.org/cgi-bin/carddisp.pl?gene=CHIT1">https://www.genecards.org/cgi-bin/carddisp.pl?gene=CHIT1</a>         |
| NFE2L2    | Nuclear Factor, Erythroid 2 Like 2                    | Protein Coding | 48 | GC02M177227 | 14.2 <a href="https://www.genecards.org/cgi-bin/carddisp.pl?gene=NFE2L2">https://www.genecards.org/cgi-bin/carddisp.pl?gene=NFE2L2</a>        |
| MIR182    | MicroRNA 182                                          | RNA Gene       | 20 | GC07M129770 | 14.19 <a href="https://www.genecards.org/cgi-bin/carddisp.pl?gene=MIR182">https://www.genecards.org/cgi-bin/carddisp.pl?gene=MIR182</a>       |
| DGAT1     | Diacylglycerol O-Acyltransferase 1                    | Protein Coding | 47 | GC08M144316 | 14.17 <a href="https://www.genecards.org/cgi-bin/carddisp.pl?gene=DGAT1">https://www.genecards.org/cgi-bin/carddisp.pl?gene=DGAT1</a>         |
| KRT7      | Keratin 7                                             | Protein Coding | 41 | GC12P052232 | 14.1 <a href="https://www.genecards.org/cgi-bin/carddisp.pl?gene=KRT7">https://www.genecards.org/cgi-bin/carddisp.pl?gene=KRT7</a>            |
| ELOVL6    | ELOVL Fatty Acid Elongase 6                           | Protein Coding | 40 | GC04M110045 | 14.06 <a href="https://www.genecards.org/cgi-bin/carddisp.pl?gene=ELOVL6">https://www.genecards.org/cgi-bin/carddisp.pl?gene=ELOVL6</a>       |
| SERPINA6  | Serpin Family A Member 6                              | Protein Coding | 43 | GC14M094341 | 14.06 <a href="https://www.genecards.org/cgi-bin/carddisp.pl?gene=SERPINA6">https://www.genecards.org/cgi-bin/carddisp.pl?gene=SERPINA6</a>   |
| TFR2      | Transferrin Receptor 2                                | Protein Coding | 44 | GC07M100620 | 14.02 <a href="https://www.genecards.org/cgi-bin/carddisp.pl?gene=TFR2">https://www.genecards.org/cgi-bin/carddisp.pl?gene=TFR2</a>           |
| CRH       | Corticotropin Releasing Hormone                       | Protein Coding | 44 | GC08M066176 | 14 <a href="https://www.genecards.org/cgi-bin/carddisp.pl?gene=CRH">https://www.genecards.org/cgi-bin/carddisp.pl?gene=CRH</a>                |
| RXRA      | Retinoid X Receptor Alpha                             | Protein Coding | 49 | GC09P134317 | 13.99 <a href="https://www.genecards.org/cgi-bin/carddisp.pl?gene=RXRA">https://www.genecards.org/cgi-bin/carddisp.pl?gene=RXRA</a>           |
| BMPR1A    | Bone Morphogenetic Protein Receptor Type 1A           | Protein Coding | 51 | GC10P086756 | 13.97 <a href="https://www.genecards.org/cgi-bin/carddisp.pl?gene=BMPR1A">https://www.genecards.org/cgi-bin/carddisp.pl?gene=BMPR1A</a>       |
| ERBB4     | Erb-B2 Receptor Tyrosine Kinase 4                     | Protein Coding | 55 | GC02M211375 | 13.93 <a href="https://www.genecards.org/cgi-bin/carddisp.pl?gene=ERBB4">https://www.genecards.org/cgi-bin/carddisp.pl?gene=ERBB4</a>         |
| ALPP      | Alkaline Phosphatase, Placental                       | Protein Coding | 46 | GC02P232378 | 13.93 <a href="https://www.genecards.org/cgi-bin/carddisp.pl?gene=ALPP">https://www.genecards.org/cgi-bin/carddisp.pl?gene=ALPP</a>           |
| TNFRSF11B | TNF Receptor Superfamily Member 11b                   | Protein Coding | 47 | GC08M118923 | 13.93 <a href="https://www.genecards.org/cgi-bin/carddisp.pl?gene=TNFRSF11B">https://www.genecards.org/cgi-bin/carddisp.pl?gene=TNFRSF11B</a> |
| CYP17A1   | Cytochrome P450 Family 17 Subfamily A Member 1        | Protein Coding | 48 | GC10M102830 | 13.87 <a href="https://www.genecards.org/cgi-bin/carddisp.pl?gene=CYP17A1">https://www.genecards.org/cgi-bin/carddisp.pl?gene=CYP17A1</a>     |
| PLA2G4A   | Phospholipase A2 Group IVA                            | Protein Coding | 49 | GC01P186798 | 13.82 <a href="https://www.genecards.org/cgi-bin/carddisp.pl?gene=PLA2G4A">https://www.genecards.org/cgi-bin/carddisp.pl?gene=PLA2G4A</a>     |
| NDUFB3    | NADH:Ubiquinone Oxidoreductase Subunit B3             | Protein Coding | 42 | GC02P201071 | 13.82 <a href="https://www.genecards.org/cgi-bin/carddisp.pl?gene=NDUFB3">https://www.genecards.org/cgi-bin/carddisp.pl?gene=NDUFB3</a>       |
| VCAM1     | Vascular Cell Adhesion Molecule 1                     | Protein Coding | 45 | GC01P100719 | 13.8 <a href="https://www.genecards.org/cgi-bin/carddisp.pl?gene=VCAM1">https://www.genecards.org/cgi-bin/carddisp.pl?gene=VCAM1</a>          |
| LRP6      | LDL Receptor Related Protein 6                        | Protein Coding | 48 | GC12M013893 | 13.8 <a href="https://www.genecards.org/cgi-bin/carddisp.pl?gene=LRP6">https://www.genecards.org/cgi-bin/carddisp.pl?gene=LRP6</a>            |
| SERPINF2  | Serpin Family F Member 2                              | Protein Coding | 44 | GC17P001742 | 13.73 <a href="https://www.genecards.org/cgi-bin/carddisp.pl?gene=SERPINF2">https://www.genecards.org/cgi-bin/carddisp.pl?gene=SERPINF2</a>   |
| ETS1      | ETS Proto-Oncogene 1, Transcription Factor            | Protein Coding | 49 | GC11M128458 | 13.72 <a href="https://www.genecards.org/cgi-bin/carddisp.pl?gene=ETS1">https://www.genecards.org/cgi-bin/carddisp.pl?gene=ETS1</a>           |
| HSD11B1   | Hydroxysteroid 11-Beta Dehydrogenase 1                | Protein Coding | 49 | GC01P209686 | 13.7 <a href="https://www.genecards.org/cgi-bin/carddisp.pl?gene=HSD11B1">https://www.genecards.org/cgi-bin/carddisp.pl?gene=HSD11B1</a>      |
| FGFR4     | Fibroblast Growth Factor Receptor 4                   | Protein Coding | 51 | GC05P177086 | 13.69 <a href="https://www.genecards.org/cgi-bin/carddisp.pl?gene=FGFR4">https://www.genecards.org/cgi-bin/carddisp.pl?gene=FGFR4</a>         |
| LCN2      | Lipocalin 2                                           | Protein Coding | 43 | GC09P128149 | 13.67 <a href="https://www.genecards.org/cgi-bin/carddisp.pl?gene=LCN2">https://www.genecards.org/cgi-bin/carddisp.pl?gene=LCN2</a>           |
| ADH1C     | Alcohol Dehydrogenase 1C (Class I), Gamma Polypeptide | Protein Coding | 42 | GC04M099336 | 13.67 <a href="https://www.genecards.org/cgi-bin/carddisp.pl?gene=ADH1C">https://www.genecards.org/cgi-bin/carddisp.pl?gene=ADH1C</a>         |
| ALPL      | Alkaline Phosphatase, Biom mineralization Associated  | Protein Coding | 50 | GC01P021508 | 13.66 <a href="https://www.genecards.org/cgi-bin/carddisp.pl?gene=ALPL">https://www.genecards.org/cgi-bin/carddisp.pl?gene=ALPL</a>           |
| SHBG      | Sex Hormone Binding Globulin                          | Protein Coding | 40 | GC17P007613 | 13.61 <a href="https://www.genecards.org/cgi-bin/carddisp.pl?gene=SHBG">https://www.genecards.org/cgi-bin/carddisp.pl?gene=SHBG</a>           |
| MYF5      | Myogenic Factor 5                                     | Protein Coding | 40 | GC12P080716 | 13.61 <a href="https://www.genecards.org/cgi-bin/carddisp.pl?gene=MYF5">https://www.genecards.org/cgi-bin/carddisp.pl?gene=MYF5</a>           |
| DSP       | Desmoplakin                                           | Protein Coding | 49 | GC06P007541 | 13.6 <a href="https://www.genecards.org/cgi-bin/carddisp.pl?gene=DSP">https://www.genecards.org/cgi-bin/carddisp.pl?gene=DSP</a>              |
| CA2       | Carbonic Anhydrase 2                                  | Protein Coding | 51 | GC08P085463 | 13.6 <a href="https://www.genecards.org/cgi-bin/carddisp.pl?gene=CA2">https://www.genecards.org/cgi-bin/carddisp.pl?gene=CA2</a>              |
| FABP3     | Fatty Acid Binding Protein 3                          | Protein Coding | 44 | GC01M031365 | 13.59 <a href="https://www.genecards.org/cgi-bin/carddisp.pl?gene=FABP3">https://www.genecards.org/cgi-bin/carddisp.pl?gene=FABP3</a>         |
| KRT19     | Keratin 19                                            | Protein Coding | 45 | GC17M041523 | 13.59 <a href="https://www.genecards.org/cgi-bin/carddisp.pl?gene=KRT19">https://www.genecards.org/cgi-bin/carddisp.pl?gene=KRT19</a>         |
| CD55      | CD55 Molecule (Cromer Blood Group)                    | Protein Coding | 47 | GC01P207321 | 13.52 <a href="https://www.genecards.org/cgi-bin/carddisp.pl?gene=CD55">https://www.genecards.org/cgi-bin/carddisp.pl?gene=CD55</a>           |
| IFNA2     | Interferon Alpha 2                                    | Protein Coding | 41 | GC09M021384 | 13.51 <a href="https://www.genecards.org/cgi-bin/carddisp.pl?gene=IFNA2">https://www.genecards.org/cgi-bin/carddisp.pl?gene=IFNA2</a>         |
| MIR15B    | MicroRNA 15b                                          | RNA Gene       | 18 | GC03P160404 | 13.51 <a href="https://www.genecards.org/cgi-bin/carddisp.pl?gene=MIR15B">https://www.genecards.org/cgi-bin/carddisp.pl?gene=MIR15B</a>       |

|         |                                                        |                |    |             |                                                                                                                                           |
|---------|--------------------------------------------------------|----------------|----|-------------|-------------------------------------------------------------------------------------------------------------------------------------------|
| SELE    | Selectin E                                             | Protein Coding | 44 | GC01M169722 | 13.41 <a href="https://www.genecards.org/cgi-bin/carddisp.pl?gene=SELE">https://www.genecards.org/cgi-bin/carddisp.pl?gene=SELE</a>       |
| CNR1    | Cannabinoid Receptor 1                                 | Protein Coding | 46 | GC06M088139 | 13.4 <a href="https://www.genecards.org/cgi-bin/carddisp.pl?gene=CNR1">https://www.genecards.org/cgi-bin/carddisp.pl?gene=CNR1</a>        |
| MAPK10  | Mitogen-Activated Protein Kinase 10                    | Protein Coding | 51 | GC04M085990 | 13.39 <a href="https://www.genecards.org/cgi-bin/carddisp.pl?gene=MAPK10">https://www.genecards.org/cgi-bin/carddisp.pl?gene=MAPK10</a>   |
| HP      | Haptoglobin                                            | Protein Coding | 44 | GC16P072089 | 13.38 <a href="https://www.genecards.org/cgi-bin/carddisp.pl?gene=HP">https://www.genecards.org/cgi-bin/carddisp.pl?gene=HP</a>           |
| ERCC2   | ERCC Excision Repair 2, TFIIH Core Complex Helica      | Protein Coding | 47 | GC19M045349 | 13.35 <a href="https://www.genecards.org/cgi-bin/carddisp.pl?gene=ERCC2">https://www.genecards.org/cgi-bin/carddisp.pl?gene=ERCC2</a>     |
| HUWE1   | HECT, UBA And WWE Domain Containing E3 Ubiquitin       | Protein Coding | 44 | GC0XM053532 | 13.29 <a href="https://www.genecards.org/cgi-bin/carddisp.pl?gene=HUWE1">https://www.genecards.org/cgi-bin/carddisp.pl?gene=HUWE1</a>     |
| MAPK14  | Mitogen-Activated Protein Kinase 14                    | Protein Coding | 51 | GC06P047451 | 13.27 <a href="https://www.genecards.org/cgi-bin/carddisp.pl?gene=MAPK14">https://www.genecards.org/cgi-bin/carddisp.pl?gene=MAPK14</a>   |
| AGT     | Angiotensinogen                                        | Protein Coding | 49 | GC01M230702 | 13.23 <a href="https://www.genecards.org/cgi-bin/carddisp.pl?gene=AGT">https://www.genecards.org/cgi-bin/carddisp.pl?gene=AGT</a>         |
| NDUFA10 | NADH:Ubiquinone Oxidoreductase Subunit A10             | Protein Coding | 44 | GC02M239893 | 13.16 <a href="https://www.genecards.org/cgi-bin/carddisp.pl?gene=NDUFA10">https://www.genecards.org/cgi-bin/carddisp.pl?gene=NDUFA10</a> |
| UQCRC2  | Ubiquinol-Cytochrome C Reductase Core Protein 2        | Protein Coding | 46 | GC16P021963 | 13.12 <a href="https://www.genecards.org/cgi-bin/carddisp.pl?gene=UQCRC2">https://www.genecards.org/cgi-bin/carddisp.pl?gene=UQCRC2</a>   |
| NDUFA12 | NADH:Ubiquinone Oxidoreductase Subunit A12             | Protein Coding | 44 | GC12M094898 | 13.11 <a href="https://www.genecards.org/cgi-bin/carddisp.pl?gene=NDUFA12">https://www.genecards.org/cgi-bin/carddisp.pl?gene=NDUFA12</a> |
| CD44    | CD44 Molecule (Indian Blood Group)                     | Protein Coding | 47 | GC11P035139 | 13.1 <a href="https://www.genecards.org/cgi-bin/carddisp.pl?gene=CD44">https://www.genecards.org/cgi-bin/carddisp.pl?gene=CD44</a>        |
| IRF1    | Interferon Regulatory Factor 1                         | Protein Coding | 47 | GC05M132481 | 13.06 <a href="https://www.genecards.org/cgi-bin/carddisp.pl?gene=IRF1">https://www.genecards.org/cgi-bin/carddisp.pl?gene=IRF1</a>       |
| WNT3A   | Wnt Family Member 3A                                   | Protein Coding | 47 | GC01P228127 | 13.04 <a href="https://www.genecards.org/cgi-bin/carddisp.pl?gene=WNT3A">https://www.genecards.org/cgi-bin/carddisp.pl?gene=WNT3A</a>     |
| GLUD1   | Glutamate Dehydrogenase 1                              | Protein Coding | 50 | GC10M087050 | 13.02 <a href="https://www.genecards.org/cgi-bin/carddisp.pl?gene=GLUD1">https://www.genecards.org/cgi-bin/carddisp.pl?gene=GLUD1</a>     |
| ALDH2   | Aldehyde Dehydrogenase 2 Family Member                 | Protein Coding | 50 | GC12P111766 | 13.01 <a href="https://www.genecards.org/cgi-bin/carddisp.pl?gene=ALDH2">https://www.genecards.org/cgi-bin/carddisp.pl?gene=ALDH2</a>     |
| SELP    | Selectin P                                             | Protein Coding | 45 | GC01M169558 | 12.95 <a href="https://www.genecards.org/cgi-bin/carddisp.pl?gene=SELP">https://www.genecards.org/cgi-bin/carddisp.pl?gene=SELP</a>       |
| MIR154  | MicroRNA 154                                           | RNA Gene       | 18 | GC14P104778 | 12.94 <a href="https://www.genecards.org/cgi-bin/carddisp.pl?gene=MIR154">https://www.genecards.org/cgi-bin/carddisp.pl?gene=MIR154</a>   |
| HJV     | Hemojuvelin BMP Co-Receptor                            | Protein Coding | 35 | GC01M146018 | 12.91 <a href="https://www.genecards.org/cgi-bin/carddisp.pl?gene=HJV">https://www.genecards.org/cgi-bin/carddisp.pl?gene=HJV</a>         |
| SMAD3   | SMAD Family Member 3                                   | Protein Coding | 49 | GC15P067063 | 12.88 <a href="https://www.genecards.org/cgi-bin/carddisp.pl?gene=SMAD3">https://www.genecards.org/cgi-bin/carddisp.pl?gene=SMAD3</a>     |
| PEMT    | Phosphatidylethanolamine N-Methyltransferase           | Protein Coding | 41 | GC17M017506 | 12.86 <a href="https://www.genecards.org/cgi-bin/carddisp.pl?gene=PEMT">https://www.genecards.org/cgi-bin/carddisp.pl?gene=PEMT</a>       |
| IL6R    | Interleukin 6 Receptor                                 | Protein Coding | 48 | GC01P154405 | 12.85 <a href="https://www.genecards.org/cgi-bin/carddisp.pl?gene=IL6R">https://www.genecards.org/cgi-bin/carddisp.pl?gene=IL6R</a>       |
| TNFSF10 | TNF Superfamily Member 10                              | Protein Coding | 46 | GC03M172505 | 12.81 <a href="https://www.genecards.org/cgi-bin/carddisp.pl?gene=TNFSF10">https://www.genecards.org/cgi-bin/carddisp.pl?gene=TNFSF10</a> |
| ADH1B   | Alcohol Dehydrogenase 1B (Class I), Beta Polypeptide   | Protein Coding | 43 | GC04M099304 | 12.77 <a href="https://www.genecards.org/cgi-bin/carddisp.pl?gene=ADH1B">https://www.genecards.org/cgi-bin/carddisp.pl?gene=ADH1B</a>     |
| MT-ND3  | Mitochondrially Encoded NADH:Ubiquinone Oxidoreductase | Protein Coding | 31 | GCMTPO10061 | 12.75 <a href="https://www.genecards.org/cgi-bin/carddisp.pl?gene=MT-ND3">https://www.genecards.org/cgi-bin/carddisp.pl?gene=MT-ND3</a>   |
| CYP1B1  | Cytochrome P450 Family 1 Subfamily B Member 1          | Protein Coding | 48 | GC02M038034 | 12.7 <a href="https://www.genecards.org/cgi-bin/carddisp.pl?gene=CYP1B1">https://www.genecards.org/cgi-bin/carddisp.pl?gene=CYP1B1</a>    |
| NPPB    | Natriuretic Peptide B                                  | Protein Coding | 44 | GC01M011858 | 12.66 <a href="https://www.genecards.org/cgi-bin/carddisp.pl?gene=NPPB">https://www.genecards.org/cgi-bin/carddisp.pl?gene=NPPB</a>       |
| MIR23B  | MicroRNA 23b                                           | RNA Gene       | 20 | GC09P095085 | 12.56 <a href="https://www.genecards.org/cgi-bin/carddisp.pl?gene=MIR23B">https://www.genecards.org/cgi-bin/carddisp.pl?gene=MIR23B</a>   |
| AIFM1   | Apoptosis Inducing Factor Mitochondria Associated 1    | Protein Coding | 49 | GC0XM130129 | 12.51 <a href="https://www.genecards.org/cgi-bin/carddisp.pl?gene=AIFM1">https://www.genecards.org/cgi-bin/carddisp.pl?gene=AIFM1</a>     |
| MYH9    | Myosin Heavy Chain 9                                   | Protein Coding | 49 | GC22M036281 | 12.51 <a href="https://www.genecards.org/cgi-bin/carddisp.pl?gene=MYH9">https://www.genecards.org/cgi-bin/carddisp.pl?gene=MYH9</a>       |
| SLC27A1 | Solute Carrier Family 27 Member 1                      | Protein Coding | 41 | GC19P023305 | 12.5 <a href="https://www.genecards.org/cgi-bin/carddisp.pl?gene=SLC27A1">https://www.genecards.org/cgi-bin/carddisp.pl?gene=SLC27A1</a>  |
| CYC1    | Cytochrome C1                                          | Protein Coding | 45 | GC08P144095 | 12.48 <a href="https://www.genecards.org/cgi-bin/carddisp.pl?gene=CYC1">https://www.genecards.org/cgi-bin/carddisp.pl?gene=CYC1</a>       |
| LNCARSR | LncRNA Regulator Of Akt Signaling Associated With      | RNA Gene       | 10 | GC09M079507 | 12.45 <a href="https://www.genecards.org/cgi-bin/carddisp.pl?gene=LNCARSR">https://www.genecards.org/cgi-bin/carddisp.pl?gene=LNCARSR</a> |
| FADS2   | Fatty Acid Desaturase 2                                | Protein Coding | 44 | GC11P061792 | 12.44 <a href="https://www.genecards.org/cgi-bin/carddisp.pl?gene=FADS2">https://www.genecards.org/cgi-bin/carddisp.pl?gene=FADS2</a>     |
| DRD3    | Dopamine Receptor D3                                   | Protein Coding | 44 | GC03M114128 | 12.44 <a href="https://www.genecards.org/cgi-bin/carddisp.pl?gene=DRD3">https://www.genecards.org/cgi-bin/carddisp.pl?gene=DRD3</a>       |
| SCARB1  | Scavenger Receptor Class B Member 1                    | Protein Coding | 45 | GC12M124776 | 12.43 <a href="https://www.genecards.org/cgi-bin/carddisp.pl?gene=SCARB1">https://www.genecards.org/cgi-bin/carddisp.pl?gene=SCARB1</a>   |
| CEL     | Carboxyl Ester Lipase                                  | Protein Coding | 46 | GC09P133061 | 12.37 <a href="https://www.genecards.org/cgi-bin/carddisp.pl?gene=CEL">https://www.genecards.org/cgi-bin/carddisp.pl?gene=CEL</a>         |
| UCP1    | Uncoupling Protein 1                                   | Protein Coding | 44 | GC04M140559 | 12.34 <a href="https://www.genecards.org/cgi-bin/carddisp.pl?gene=UCP1">https://www.genecards.org/cgi-bin/carddisp.pl?gene=UCP1</a>       |
| MMP13   | Matrix Metalloproteinase 13                            | Protein Coding | 50 | GC11M102942 | 12.29 <a href="https://www.genecards.org/cgi-bin/carddisp.pl?gene=MMP13">https://www.genecards.org/cgi-bin/carddisp.pl?gene=MMP13</a>     |

|          |                                                      |                |    |             |                                                                                                                                             |
|----------|------------------------------------------------------|----------------|----|-------------|---------------------------------------------------------------------------------------------------------------------------------------------|
| ADA2     | Adenosine Deaminase 2                                | Protein Coding | 34 | GC22M017179 | 12.29 <a href="https://www.genecards.org/cgi-bin/carddisp.pl?gene=ADA2">https://www.genecards.org/cgi-bin/carddisp.pl?gene=ADA2</a>         |
| NR1I2    | Nuclear Receptor Subfamily 1 Group I Member 2        | Protein Coding | 45 | GC03P119780 | 12.16 <a href="https://www.genecards.org/cgi-bin/carddisp.pl?gene=NR1I2">https://www.genecards.org/cgi-bin/carddisp.pl?gene=NR1I2</a>       |
| LIVAR    | Liver Cell Viability Associated LncRNA               | RNA Gene       | 10 | GC18M070336 | 12.11 <a href="https://www.genecards.org/cgi-bin/carddisp.pl?gene=LIVAR">https://www.genecards.org/cgi-bin/carddisp.pl?gene=LIVAR</a>       |
| LRPPRC   | Leucine Rich Pentatricopeptide Repeat Containing     | Protein Coding | 42 | GC02M043850 | 12.1 <a href="https://www.genecards.org/cgi-bin/carddisp.pl?gene=LRPPRC">https://www.genecards.org/cgi-bin/carddisp.pl?gene=LRPPRC</a>      |
| HNRNPA1  | Heterogeneous Nuclear Ribonucleoprotein A1           | Protein Coding | 45 | GC12P054280 | 12.1 <a href="https://www.genecards.org/cgi-bin/carddisp.pl?gene=HNRNPA1">https://www.genecards.org/cgi-bin/carddisp.pl?gene=HNRNPA1</a>    |
| PRKAA2   | Protein Kinase AMP-Activated Catalytic Subunit Alpha | Protein Coding | 50 | GC01P056645 | 12.06 <a href="https://www.genecards.org/cgi-bin/carddisp.pl?gene=PRKAA2">https://www.genecards.org/cgi-bin/carddisp.pl?gene=PRKAA2</a>     |
| CPS1     | Carbamoyl-Phosphate Synthase 1                       | Protein Coding | 45 | GC02P210477 | 12.05 <a href="https://www.genecards.org/cgi-bin/carddisp.pl?gene=CPS1">https://www.genecards.org/cgi-bin/carddisp.pl?gene=CPS1</a>         |
| TIMP2    | TIMP Metalloproteinase Inhibitor 2                   | Protein Coding | 44 | GC17M078852 | 12.04 <a href="https://www.genecards.org/cgi-bin/carddisp.pl?gene=TIMP2">https://www.genecards.org/cgi-bin/carddisp.pl?gene=TIMP2</a>       |
| PRSS1    | Serine Protease 1                                    | Protein Coding | 45 | GC07P144938 | 12 <a href="https://www.genecards.org/cgi-bin/carddisp.pl?gene=PRSS1">https://www.genecards.org/cgi-bin/carddisp.pl?gene=PRSS1</a>          |
| CYBA     | Cytochrome B-245 Alpha Chain                         | Protein Coding | 47 | GC16M088643 | 11.98 <a href="https://www.genecards.org/cgi-bin/carddisp.pl?gene=CYBA">https://www.genecards.org/cgi-bin/carddisp.pl?gene=CYBA</a>         |
| IGFBP3   | Insulin Like Growth Factor Binding Protein 3         | Protein Coding | 45 | GC07M045912 | 11.96 <a href="https://www.genecards.org/cgi-bin/carddisp.pl?gene=IGFBP3">https://www.genecards.org/cgi-bin/carddisp.pl?gene=IGFBP3</a>     |
| MIR95    | MicroRNA 95                                          | RNA Gene       | 16 | GC04M008007 | 11.95 <a href="https://www.genecards.org/cgi-bin/carddisp.pl?gene=MIR95">https://www.genecards.org/cgi-bin/carddisp.pl?gene=MIR95</a>       |
| CYP2A6   | Cytochrome P450 Family 2 Subfamily A Member 6        | Protein Coding | 47 | GC19M040843 | 11.92 <a href="https://www.genecards.org/cgi-bin/carddisp.pl?gene=CYP2A6">https://www.genecards.org/cgi-bin/carddisp.pl?gene=CYP2A6</a>     |
| ADRB3    | Adrenoceptor Beta 3                                  | Protein Coding | 45 | GC08M037962 | 11.92 <a href="https://www.genecards.org/cgi-bin/carddisp.pl?gene=ADRB3">https://www.genecards.org/cgi-bin/carddisp.pl?gene=ADRB3</a>       |
| MIR187   | MicroRNA 187                                         | RNA Gene       | 17 | GC18M035904 | 11.82 <a href="https://www.genecards.org/cgi-bin/carddisp.pl?gene=MIR187">https://www.genecards.org/cgi-bin/carddisp.pl?gene=MIR187</a>     |
| NDUFA11  | NADH:Ubiquinone Oxidoreductase Subunit A11           | Protein Coding | 37 | GC19M005891 | 11.75 <a href="https://www.genecards.org/cgi-bin/carddisp.pl?gene=NDUFA11">https://www.genecards.org/cgi-bin/carddisp.pl?gene=NDUFA11</a>   |
| FLI1     | Fli-1 Proto-Oncogene, ETS Transcription Factor       | Protein Coding | 49 | GC11P128686 | 11.73 <a href="https://www.genecards.org/cgi-bin/carddisp.pl?gene=FLI1">https://www.genecards.org/cgi-bin/carddisp.pl?gene=FLI1</a>         |
| SHH      | Sonic Hedgehog Signaling Molecule                    | Protein Coding | 50 | GC07M155799 | 11.69 <a href="https://www.genecards.org/cgi-bin/carddisp.pl?gene=SHH">https://www.genecards.org/cgi-bin/carddisp.pl?gene=SHH</a>           |
| HSP90AA1 | Heat Shock Protein 90 Alpha Family Class A Member    | Protein Coding | 48 | GC14M102080 | 11.63 <a href="https://www.genecards.org/cgi-bin/carddisp.pl?gene=HSP90AA1">https://www.genecards.org/cgi-bin/carddisp.pl?gene=HSP90AA1</a> |
| PRL      | Prolactin                                            | Protein Coding | 44 | GC06M022230 | 11.62 <a href="https://www.genecards.org/cgi-bin/carddisp.pl?gene=PRL">https://www.genecards.org/cgi-bin/carddisp.pl?gene=PRL</a>           |
| PARP1    | Poly(ADP-Ribose) Polymerase 1                        | Protein Coding | 49 | GC01M226360 | 11.61 <a href="https://www.genecards.org/cgi-bin/carddisp.pl?gene=PARP1">https://www.genecards.org/cgi-bin/carddisp.pl?gene=PARP1</a>       |
| UQCRCQ   | Ubiquinol-Cytochrome C Reductase Complex III Subu    | Protein Coding | 41 | GC05P132866 | 11.6 <a href="https://www.genecards.org/cgi-bin/carddisp.pl?gene=UQCRCQ">https://www.genecards.org/cgi-bin/carddisp.pl?gene=UQCRCQ</a>      |
| COX8A    | Cytochrome C Oxidase Subunit 8A                      | Protein Coding | 41 | GC11P063977 | 11.57 <a href="https://www.genecards.org/cgi-bin/carddisp.pl?gene=COX8A">https://www.genecards.org/cgi-bin/carddisp.pl?gene=COX8A</a>       |
| FGA      | Fibrinogen Alpha Chain                               | Protein Coding | 47 | GC04M154583 | 11.44 <a href="https://www.genecards.org/cgi-bin/carddisp.pl?gene=FGA">https://www.genecards.org/cgi-bin/carddisp.pl?gene=FGA</a>           |
| HBA1     | Hemoglobin Subunit Alpha 1                           | Protein Coding | 42 | GC16P001370 | 11.37 <a href="https://www.genecards.org/cgi-bin/carddisp.pl?gene=HBA1">https://www.genecards.org/cgi-bin/carddisp.pl?gene=HBA1</a>         |
| SLC27A2  | Solute Carrier Family 27 Member 2                    | Protein Coding | 45 | GC15P050182 | 11.34 <a href="https://www.genecards.org/cgi-bin/carddisp.pl?gene=SLC27A2">https://www.genecards.org/cgi-bin/carddisp.pl?gene=SLC27A2</a>   |
| IL15     | Interleukin 15                                       | Protein Coding | 40 | GC04P141636 | 11.28 <a href="https://www.genecards.org/cgi-bin/carddisp.pl?gene=IL15">https://www.genecards.org/cgi-bin/carddisp.pl?gene=IL15</a>         |
| LITAF    | Lipopolysaccharide Induced TNF Factor                | Protein Coding | 44 | GC16M011547 | 11.25 <a href="https://www.genecards.org/cgi-bin/carddisp.pl?gene=LITAF">https://www.genecards.org/cgi-bin/carddisp.pl?gene=LITAF</a>       |
| CSF1     | Colony Stimulating Factor 1                          | Protein Coding | 43 | GC01P109911 | 11.22 <a href="https://www.genecards.org/cgi-bin/carddisp.pl?gene=CSF1">https://www.genecards.org/cgi-bin/carddisp.pl?gene=CSF1</a>         |
| IL1R1    | Interleukin 1 Receptor Type 1                        | Protein Coding | 45 | GC02P102136 | 11.19 <a href="https://www.genecards.org/cgi-bin/carddisp.pl?gene=IL1R1">https://www.genecards.org/cgi-bin/carddisp.pl?gene=IL1R1</a>       |
| GC       | GC Vitamin D Binding Protein                         | Protein Coding | 43 | GC04M071741 | 11.17 <a href="https://www.genecards.org/cgi-bin/carddisp.pl?gene=GC">https://www.genecards.org/cgi-bin/carddisp.pl?gene=GC</a>             |
| STAR     | Steroidogenic Acute Regulatory Protein               | Protein Coding | 46 | GC08M038145 | 11.13 <a href="https://www.genecards.org/cgi-bin/carddisp.pl?gene=STAR">https://www.genecards.org/cgi-bin/carddisp.pl?gene=STAR</a>         |
| NPY      | Neuropeptide Y                                       | Protein Coding | 45 | GC07P024290 | 11.13 <a href="https://www.genecards.org/cgi-bin/carddisp.pl?gene=NPY">https://www.genecards.org/cgi-bin/carddisp.pl?gene=NPY</a>           |
| CES1     | Carboxylesterase 1                                   | Protein Coding | 46 | GC16M055836 | 11.11 <a href="https://www.genecards.org/cgi-bin/carddisp.pl?gene=CES1">https://www.genecards.org/cgi-bin/carddisp.pl?gene=CES1</a>         |
| COX4I1   | Cytochrome C Oxidase Subunit 4I1                     | Protein Coding | 44 | GC16P085798 | 11.11 <a href="https://www.genecards.org/cgi-bin/carddisp.pl?gene=COX4I1">https://www.genecards.org/cgi-bin/carddisp.pl?gene=COX4I1</a>     |
| AHR      | Aryl Hydrocarbon Receptor                            | Protein Coding | 48 | GC07P016916 | 11.09 <a href="https://www.genecards.org/cgi-bin/carddisp.pl?gene=AHR">https://www.genecards.org/cgi-bin/carddisp.pl?gene=AHR</a>           |
| FABP12   | Fatty Acid Binding Protein 12                        | Protein Coding | 31 | GC08M081524 | 11.09 <a href="https://www.genecards.org/cgi-bin/carddisp.pl?gene=FABP12">https://www.genecards.org/cgi-bin/carddisp.pl?gene=FABP12</a>     |
| IFNL3    | Interferon Lambda 3                                  | Protein Coding | 35 | GC19M039243 | 11.07 <a href="https://www.genecards.org/cgi-bin/carddisp.pl?gene=IFNL3">https://www.genecards.org/cgi-bin/carddisp.pl?gene=IFNL3</a>       |
| CLU      | Clusterin                                            | Protein Coding | 46 | GC08M027596 | 11.07 <a href="https://www.genecards.org/cgi-bin/carddisp.pl?gene=CLU">https://www.genecards.org/cgi-bin/carddisp.pl?gene=CLU</a>           |

|         |                                                  |                |    |             |       |                                                                                                                                     |
|---------|--------------------------------------------------|----------------|----|-------------|-------|-------------------------------------------------------------------------------------------------------------------------------------|
| DDX3X   | DEAD-Box Helicase 3 X-Linked                     | Protein Coding | 47 | GC0XP041333 | 11.05 | <a href="https://www.genecards.org/cgi-bin/carddisp.pl?gene=DDX3X">https://www.genecards.org/cgi-bin/carddisp.pl?gene=DDX3X</a>     |
| DKK1    | Dickkopf WNT Signaling Pathway Inhibitor 1       | Protein Coding | 45 | GC10P052314 | 11.05 | <a href="https://www.genecards.org/cgi-bin/carddisp.pl?gene=DKK1">https://www.genecards.org/cgi-bin/carddisp.pl?gene=DKK1</a>       |
| SLC10A1 | Solute Carrier Family 10 Member 1                | Protein Coding | 43 | GC14M069775 | 11.04 | <a href="https://www.genecards.org/cgi-bin/carddisp.pl?gene=SLC10A1">https://www.genecards.org/cgi-bin/carddisp.pl?gene=SLC10A1</a> |
| CXCR3   | C-X-C Motif Chemokine Receptor 3                 | Protein Coding | 44 | GC0XM071615 | 10.96 | <a href="https://www.genecards.org/cgi-bin/carddisp.pl?gene=CXCR3">https://www.genecards.org/cgi-bin/carddisp.pl?gene=CXCR3</a>     |
| CASP7   | Caspase 7                                        | Protein Coding | 50 | GC10P113679 | 10.84 | <a href="https://www.genecards.org/cgi-bin/carddisp.pl?gene=CASP7">https://www.genecards.org/cgi-bin/carddisp.pl?gene=CASP7</a>     |
| S100A9  | S100 Calcium Binding Protein A9                  | Protein Coding | 43 | GC01P153357 | 10.83 | <a href="https://www.genecards.org/cgi-bin/carddisp.pl?gene=S100A9">https://www.genecards.org/cgi-bin/carddisp.pl?gene=S100A9</a>   |
| CASP9   | Caspase 9                                        | Protein Coding | 48 | GC01M015491 | 10.82 | <a href="https://www.genecards.org/cgi-bin/carddisp.pl?gene=CASP9">https://www.genecards.org/cgi-bin/carddisp.pl?gene=CASP9</a>     |
| MIR29A  | MicroRNA 29a                                     | RNA Gene       | 21 | GC07M130876 | 10.78 | <a href="https://www.genecards.org/cgi-bin/carddisp.pl?gene=MIR29A">https://www.genecards.org/cgi-bin/carddisp.pl?gene=MIR29A</a>   |
| TET2    | Tet Methylcytosine Dioxygenase 2                 | Protein Coding | 44 | GC04P105145 | 10.78 | <a href="https://www.genecards.org/cgi-bin/carddisp.pl?gene=TET2">https://www.genecards.org/cgi-bin/carddisp.pl?gene=TET2</a>       |
| RARS1   | Arginyl-TRNA Synthetase 1                        | Protein Coding | 35 | GC05P168487 | 10.77 | <a href="https://www.genecards.org/cgi-bin/carddisp.pl?gene=RARS1">https://www.genecards.org/cgi-bin/carddisp.pl?gene=RARS1</a>     |
| BIRC5   | Baculoviral IAP Repeat Containing 5              | Protein Coding | 47 | GC17P078214 | 10.75 | <a href="https://www.genecards.org/cgi-bin/carddisp.pl?gene=BIRC5">https://www.genecards.org/cgi-bin/carddisp.pl?gene=BIRC5</a>     |
| HSPG2   | Heparan Sulfate Proteoglycan 2                   | Protein Coding | 45 | GC01M021822 | 10.73 | <a href="https://www.genecards.org/cgi-bin/carddisp.pl?gene=HSPG2">https://www.genecards.org/cgi-bin/carddisp.pl?gene=HSPG2</a>     |
| XRCC4   | X-Ray Repair Cross Complementing 4               | Protein Coding | 43 | GC05P083077 | 10.73 | <a href="https://www.genecards.org/cgi-bin/carddisp.pl?gene=XRCC4">https://www.genecards.org/cgi-bin/carddisp.pl?gene=XRCC4</a>     |
| CLCN2   | Chloride Voltage-Gated Channel 2                 | Protein Coding | 45 | GC03M184346 | 10.72 | <a href="https://www.genecards.org/cgi-bin/carddisp.pl?gene=CLCN2">https://www.genecards.org/cgi-bin/carddisp.pl?gene=CLCN2</a>     |
| PIIG    | Peptidylprolyl Isomerase G                       | Protein Coding | 41 | GC02P169584 | 10.71 | <a href="https://www.genecards.org/cgi-bin/carddisp.pl?gene=PIIG">https://www.genecards.org/cgi-bin/carddisp.pl?gene=PIIG</a>       |
| SP1     | Sp1 Transcription Factor                         | Protein Coding | 44 | GC12P053380 | 10.7  | <a href="https://www.genecards.org/cgi-bin/carddisp.pl?gene=SP1">https://www.genecards.org/cgi-bin/carddisp.pl?gene=SP1</a>         |
| GHR     | Growth Hormone Receptor                          | Protein Coding | 47 | GC05P042429 | 10.68 | <a href="https://www.genecards.org/cgi-bin/carddisp.pl?gene=GHR">https://www.genecards.org/cgi-bin/carddisp.pl?gene=GHR</a>         |
| DNASE1  | Deoxyribonuclease 1                              | Protein Coding | 41 | GC16P003611 | 10.66 | <a href="https://www.genecards.org/cgi-bin/carddisp.pl?gene=DNASE1">https://www.genecards.org/cgi-bin/carddisp.pl?gene=DNASE1</a>   |
| IGFBP1  | Insulin Like Growth Factor Binding Protein 1     | Protein Coding | 43 | GC07P046552 | 10.65 | <a href="https://www.genecards.org/cgi-bin/carddisp.pl?gene=IGFBP1">https://www.genecards.org/cgi-bin/carddisp.pl?gene=IGFBP1</a>   |
| GFER    | Growth Factor, Augmenter Of Liver Regeneration   | Protein Coding | 45 | GC16P001984 | 10.65 | <a href="https://www.genecards.org/cgi-bin/carddisp.pl?gene=GFER">https://www.genecards.org/cgi-bin/carddisp.pl?gene=GFER</a>       |
| TMPRSS6 | Transmembrane Serine Protease 6                  | Protein Coding | 44 | GC22M037066 | 10.64 | <a href="https://www.genecards.org/cgi-bin/carddisp.pl?gene=TMPRSS6">https://www.genecards.org/cgi-bin/carddisp.pl?gene=TMPRSS6</a> |
| ADRB2   | Adrenoceptor Beta 2                              | Protein Coding | 48 | GC05P148825 | 10.62 | <a href="https://www.genecards.org/cgi-bin/carddisp.pl?gene=ADRB2">https://www.genecards.org/cgi-bin/carddisp.pl?gene=ADRB2</a>     |
| FTL     | Ferritin Light Chain                             | Protein Coding | 47 | GC19P048965 | 10.61 | <a href="https://www.genecards.org/cgi-bin/carddisp.pl?gene=FTL">https://www.genecards.org/cgi-bin/carddisp.pl?gene=FTL</a>         |
| DGAT2   | Diacylglycerol O-Acyltransferase 2               | Protein Coding | 43 | GC11P075759 | 10.58 | <a href="https://www.genecards.org/cgi-bin/carddisp.pl?gene=DGAT2">https://www.genecards.org/cgi-bin/carddisp.pl?gene=DGAT2</a>     |
| HSPA5   | Heat Shock Protein Family A (Hsp70) Member 5     | Protein Coding | 47 | GC09M125234 | 10.56 | <a href="https://www.genecards.org/cgi-bin/carddisp.pl?gene=HSPA5">https://www.genecards.org/cgi-bin/carddisp.pl?gene=HSPA5</a>     |
| SPARC   | Secreted Protein Acidic And Cysteine Rich        | Protein Coding | 50 | GC05M151639 | 10.54 | <a href="https://www.genecards.org/cgi-bin/carddisp.pl?gene=SPARC">https://www.genecards.org/cgi-bin/carddisp.pl?gene=SPARC</a>     |
| GAL     | Galanin And GMAP Prepropeptide                   | Protein Coding | 44 | GC11P068684 | 10.51 | <a href="https://www.genecards.org/cgi-bin/carddisp.pl?gene=GAL">https://www.genecards.org/cgi-bin/carddisp.pl?gene=GAL</a>         |
| NR0B2   | Nuclear Receptor Subfamily 0 Group B Member 2    | Protein Coding | 43 | GC01M026922 | 10.51 | <a href="https://www.genecards.org/cgi-bin/carddisp.pl?gene=NR0B2">https://www.genecards.org/cgi-bin/carddisp.pl?gene=NR0B2</a>     |
| EPRS1   | Glutamyl-Prolyl-TRNA Synthetase 1                | Protein Coding | 36 | GC01M219969 | 10.42 | <a href="https://www.genecards.org/cgi-bin/carddisp.pl?gene=EPRS1">https://www.genecards.org/cgi-bin/carddisp.pl?gene=EPRS1</a>     |
| IL21    | Interleukin 21                                   | Protein Coding | 43 | GC04M122612 | 10.41 | <a href="https://www.genecards.org/cgi-bin/carddisp.pl?gene=IL21">https://www.genecards.org/cgi-bin/carddisp.pl?gene=IL21</a>       |
| KL      | Klotho                                           | Protein Coding | 44 | GC13P033016 | 10.37 | <a href="https://www.genecards.org/cgi-bin/carddisp.pl?gene=KL">https://www.genecards.org/cgi-bin/carddisp.pl?gene=KL</a>           |
| PTPN1   | Protein Tyrosine Phosphatase Non-Receptor Type 1 | Protein Coding | 51 | GC20P050510 | 10.34 | <a href="https://www.genecards.org/cgi-bin/carddisp.pl?gene=PTPN1">https://www.genecards.org/cgi-bin/carddisp.pl?gene=PTPN1</a>     |
| MIR29B1 | MicroRNA 29b-1                                   | RNA Gene       | 21 | GC07M130877 | 10.31 | <a href="https://www.genecards.org/cgi-bin/carddisp.pl?gene=MIR29B1">https://www.genecards.org/cgi-bin/carddisp.pl?gene=MIR29B1</a> |
| MAOA    | Monoamine Oxidase A                              | Protein Coding | 50 | GC0XP043654 | 10.3  | <a href="https://www.genecards.org/cgi-bin/carddisp.pl?gene=MAOA">https://www.genecards.org/cgi-bin/carddisp.pl?gene=MAOA</a>       |
| FGB     | Fibrinogen Beta Chain                            | Protein Coding | 45 | GC04P154564 | 10.3  | <a href="https://www.genecards.org/cgi-bin/carddisp.pl?gene=FGB">https://www.genecards.org/cgi-bin/carddisp.pl?gene=FGB</a>         |
| CCK     | Cholecystokinin                                  | Protein Coding | 41 | GC03M042274 | 10.19 | <a href="https://www.genecards.org/cgi-bin/carddisp.pl?gene=CCK">https://www.genecards.org/cgi-bin/carddisp.pl?gene=CCK</a>         |
| GDF15   | Growth Differentiation Factor 15                 | Protein Coding | 41 | GC19P023329 | 10.18 | <a href="https://www.genecards.org/cgi-bin/carddisp.pl?gene=GDF15">https://www.genecards.org/cgi-bin/carddisp.pl?gene=GDF15</a>     |
| DRD1    | Dopamine Receptor D1                             | Protein Coding | 44 | GC05M175440 | 10.17 | <a href="https://www.genecards.org/cgi-bin/carddisp.pl?gene=DRD1">https://www.genecards.org/cgi-bin/carddisp.pl?gene=DRD1</a>       |
| DNMT3A  | DNA Methyltransferase 3 Alpha                    | Protein Coding | 51 | GC02M025228 | 10.13 | <a href="https://www.genecards.org/cgi-bin/carddisp.pl?gene=DNMT3A">https://www.genecards.org/cgi-bin/carddisp.pl?gene=DNMT3A</a>   |

|          |                                                                  |                |    |             |       |                                                                                                                                       |
|----------|------------------------------------------------------------------|----------------|----|-------------|-------|---------------------------------------------------------------------------------------------------------------------------------------|
| MIR149   | MicroRNA 149                                                     | RNA Gene       | 21 | GC02P240456 | 10.12 | <a href="https://www.genecards.org/cgi-bin/carddisp.pl?gene=MIR149">https://www.genecards.org/cgi-bin/carddisp.pl?gene=MIR149</a>     |
| EIF2AK4  | Eukaryotic Translation Initiation Factor 2 Alpha Kinase          | Protein Coding | 44 | GC15P039934 | 10.09 | <a href="https://www.genecards.org/cgi-bin/carddisp.pl?gene=EIF2AK4">https://www.genecards.org/cgi-bin/carddisp.pl?gene=EIF2AK4</a>   |
| GPX1     | Glutathione Peroxidase 1                                         | Protein Coding | 48 | GC03M049368 | 10.07 | <a href="https://www.genecards.org/cgi-bin/carddisp.pl?gene=GPX1">https://www.genecards.org/cgi-bin/carddisp.pl?gene=GPX1</a>         |
| PIK3CB   | Phosphatidylinositol-4,5-Bisphosphate 3-Kinase Catalytic Subunit | Protein Coding | 47 | GC03M138652 | 10.07 | <a href="https://www.genecards.org/cgi-bin/carddisp.pl?gene=PIK3CB">https://www.genecards.org/cgi-bin/carddisp.pl?gene=PIK3CB</a>     |
| MIR33B   | MicroRNA 33b                                                     | RNA Gene       | 18 | GC17M017813 | 9.99  | <a href="https://www.genecards.org/cgi-bin/carddisp.pl?gene=MIR33B">https://www.genecards.org/cgi-bin/carddisp.pl?gene=MIR33B</a>     |
| ITCH     | Itchy E3 Ubiquitin Protein Ligase                                | Protein Coding | 45 | GC20P034363 | 9.92  | <a href="https://www.genecards.org/cgi-bin/carddisp.pl?gene=ITCH">https://www.genecards.org/cgi-bin/carddisp.pl?gene=ITCH</a>         |
| MST1     | Macrophage Stimulating 1                                         | Protein Coding | 44 | GC03M049683 | 9.91  | <a href="https://www.genecards.org/cgi-bin/carddisp.pl?gene=MST1">https://www.genecards.org/cgi-bin/carddisp.pl?gene=MST1</a>         |
| NQO1     | NAD(P)H Quinone Dehydrogenase 1                                  | Protein Coding | 49 | GC16M069706 | 9.89  | <a href="https://www.genecards.org/cgi-bin/carddisp.pl?gene=NQO1">https://www.genecards.org/cgi-bin/carddisp.pl?gene=NQO1</a>         |
| HMGB1    | High Mobility Group Box 1                                        | Protein Coding | 44 | GC13M030456 | 9.86  | <a href="https://www.genecards.org/cgi-bin/carddisp.pl?gene=HMGB1">https://www.genecards.org/cgi-bin/carddisp.pl?gene=HMGB1</a>       |
| COL3A1   | Collagen Type III Alpha 1 Chain                                  | Protein Coding | 47 | GC02P188974 | 9.83  | <a href="https://www.genecards.org/cgi-bin/carddisp.pl?gene=COL3A1">https://www.genecards.org/cgi-bin/carddisp.pl?gene=COL3A1</a>     |
| LTBP3    | Latent Transforming Growth Factor Beta Binding Protein 3         | Protein Coding | 41 | GC11M065538 | 9.8   | <a href="https://www.genecards.org/cgi-bin/carddisp.pl?gene=LTBP3">https://www.genecards.org/cgi-bin/carddisp.pl?gene=LTBP3</a>       |
| PPARD    | Peroxisome Proliferator Activated Receptor Delta                 | Protein Coding | 47 | GC06P047433 | 9.77  | <a href="https://www.genecards.org/cgi-bin/carddisp.pl?gene=PPARD">https://www.genecards.org/cgi-bin/carddisp.pl?gene=PPARD</a>       |
| TPM2     | Tropomyosin 2                                                    | Protein Coding | 44 | GC09M035672 | 9.72  | <a href="https://www.genecards.org/cgi-bin/carddisp.pl?gene=TPM2">https://www.genecards.org/cgi-bin/carddisp.pl?gene=TPM2</a>         |
| PIK3R3   | Phosphoinositide-3-Kinase Regulatory Subunit 3                   | Protein Coding | 43 | GC01M046041 | 9.72  | <a href="https://www.genecards.org/cgi-bin/carddisp.pl?gene=PIK3R3">https://www.genecards.org/cgi-bin/carddisp.pl?gene=PIK3R3</a>     |
| THBS1    | Thrombospondin 1                                                 | Protein Coding | 44 | GC15P039581 | 9.68  | <a href="https://www.genecards.org/cgi-bin/carddisp.pl?gene=THBS1">https://www.genecards.org/cgi-bin/carddisp.pl?gene=THBS1</a>       |
| AKR1A1   | Aldo-Keto Reductase Family 1 Member A1                           | Protein Coding | 44 | GC01P045550 | 9.66  | <a href="https://www.genecards.org/cgi-bin/carddisp.pl?gene=AKR1A1">https://www.genecards.org/cgi-bin/carddisp.pl?gene=AKR1A1</a>     |
| MIR9-1   | MicroRNA 9-1                                                     | RNA Gene       | 20 | GC01M156420 | 9.65  | <a href="https://www.genecards.org/cgi-bin/carddisp.pl?gene=MIR9-1">https://www.genecards.org/cgi-bin/carddisp.pl?gene=MIR9-1</a>     |
| APPL1    | Adaptor Protein, Phosphotyrosine Interacting With PH Domain      | Protein Coding | 45 | GC03P057227 | 9.65  | <a href="https://www.genecards.org/cgi-bin/carddisp.pl?gene=APPL1">https://www.genecards.org/cgi-bin/carddisp.pl?gene=APPL1</a>       |
| RARRES2  | Retinoic Acid Receptor Responder 2                               | Protein Coding | 39 | GC07M150333 | 9.6   | <a href="https://www.genecards.org/cgi-bin/carddisp.pl?gene=RARRES2">https://www.genecards.org/cgi-bin/carddisp.pl?gene=RARRES2</a>   |
| SDCCAG8  | SHH Signaling And Ciliogenesis Regulator SDCCAG8                 | Protein Coding | 41 | GC01P243255 | 9.6   | <a href="https://www.genecards.org/cgi-bin/carddisp.pl?gene=SDCCAG8">https://www.genecards.org/cgi-bin/carddisp.pl?gene=SDCCAG8</a>   |
| AGER     | Advanced Glycosylation End-Product Specific Receptor             | Protein Coding | 44 | GC06M032180 | 9.57  | <a href="https://www.genecards.org/cgi-bin/carddisp.pl?gene=AGER">https://www.genecards.org/cgi-bin/carddisp.pl?gene=AGER</a>         |
| TMPO     | Thymopoietin                                                     | Protein Coding | 45 | GC12P098515 | 9.56  | <a href="https://www.genecards.org/cgi-bin/carddisp.pl?gene=TMPO">https://www.genecards.org/cgi-bin/carddisp.pl?gene=TMPO</a>         |
| EPAS1    | Endothelial PAS Domain Protein 1                                 | Protein Coding | 48 | GC02P046293 | 9.56  | <a href="https://www.genecards.org/cgi-bin/carddisp.pl?gene=EPAS1">https://www.genecards.org/cgi-bin/carddisp.pl?gene=EPAS1</a>       |
| IRF8     | Interferon Regulatory Factor 8                                   | Protein Coding | 45 | GC16P085898 | 9.55  | <a href="https://www.genecards.org/cgi-bin/carddisp.pl?gene=IRF8">https://www.genecards.org/cgi-bin/carddisp.pl?gene=IRF8</a>         |
| NR5A2    | Nuclear Receptor Subfamily 5 Group A Member 2                    | Protein Coding | 45 | GC01P199996 | 9.53  | <a href="https://www.genecards.org/cgi-bin/carddisp.pl?gene=NR5A2">https://www.genecards.org/cgi-bin/carddisp.pl?gene=NR5A2</a>       |
| SLC25A22 | Solute Carrier Family 25 Member 22                               | Protein Coding | 41 | GC11M000791 | 9.51  | <a href="https://www.genecards.org/cgi-bin/carddisp.pl?gene=SLC25A22">https://www.genecards.org/cgi-bin/carddisp.pl?gene=SLC25A22</a> |
| CD163    | CD163 Molecule                                                   | Protein Coding | 42 | GC12M007471 | 9.5   | <a href="https://www.genecards.org/cgi-bin/carddisp.pl?gene=CD163">https://www.genecards.org/cgi-bin/carddisp.pl?gene=CD163</a>       |
| SHC1     | SHC Adaptor Protein 1                                            | Protein Coding | 45 | GC01M154962 | 9.5   | <a href="https://www.genecards.org/cgi-bin/carddisp.pl?gene=SHC1">https://www.genecards.org/cgi-bin/carddisp.pl?gene=SHC1</a>         |
| UQCRB    | Ubiquinol-Cytochrome C Reductase Binding Protein                 | Protein Coding | 43 | GC08M096225 | 9.46  | <a href="https://www.genecards.org/cgi-bin/carddisp.pl?gene=UQCRB">https://www.genecards.org/cgi-bin/carddisp.pl?gene=UQCRB</a>       |
| EIF4G1   | Eukaryotic Translation Initiation Factor 4 Gamma 1               | Protein Coding | 45 | GC03P184314 | 9.42  | <a href="https://www.genecards.org/cgi-bin/carddisp.pl?gene=EIF4G1">https://www.genecards.org/cgi-bin/carddisp.pl?gene=EIF4G1</a>     |
| SI       | Sucrase-Isomaltase                                               | Protein Coding | 43 | GC03M164978 | 9.38  | <a href="https://www.genecards.org/cgi-bin/carddisp.pl?gene=SI">https://www.genecards.org/cgi-bin/carddisp.pl?gene=SI</a>             |
| RPS6KB1  | Ribosomal Protein S6 Kinase B1                                   | Protein Coding | 49 | GC17P059893 | 9.35  | <a href="https://www.genecards.org/cgi-bin/carddisp.pl?gene=RPS6KB1">https://www.genecards.org/cgi-bin/carddisp.pl?gene=RPS6KB1</a>   |
| PLAUR    | Plasminogen Activator, Urokinase Receptor                        | Protein Coding | 44 | GC19M043646 | 9.34  | <a href="https://www.genecards.org/cgi-bin/carddisp.pl?gene=PLAUR">https://www.genecards.org/cgi-bin/carddisp.pl?gene=PLAUR</a>       |
| PALLD    | Palladin, Cytoskeletal Associated Protein                        | Protein Coding | 42 | GC04P168497 | 9.33  | <a href="https://www.genecards.org/cgi-bin/carddisp.pl?gene=PALLD">https://www.genecards.org/cgi-bin/carddisp.pl?gene=PALLD</a>       |
| TPM1     | Tropomyosin 1                                                    | Protein Coding | 48 | GC15P073930 | 9.32  | <a href="https://www.genecards.org/cgi-bin/carddisp.pl?gene=TPM1">https://www.genecards.org/cgi-bin/carddisp.pl?gene=TPM1</a>         |
| COX6A1   | Cytochrome C Oxidase Subunit 6A1                                 | Protein Coding | 44 | GC12P120439 | 9.31  | <a href="https://www.genecards.org/cgi-bin/carddisp.pl?gene=COX6A1">https://www.genecards.org/cgi-bin/carddisp.pl?gene=COX6A1</a>     |
| USF1     | Upstream Transcription Factor 1                                  | Protein Coding | 43 | GC01M161039 | 9.3   | <a href="https://www.genecards.org/cgi-bin/carddisp.pl?gene=USF1">https://www.genecards.org/cgi-bin/carddisp.pl?gene=USF1</a>         |
| PEPD     | Peptidase D                                                      | Protein Coding | 45 | GC19M033386 | 9.26  | <a href="https://www.genecards.org/cgi-bin/carddisp.pl?gene=PEPD">https://www.genecards.org/cgi-bin/carddisp.pl?gene=PEPD</a>         |
| CD59     | CD59 Molecule (CD59 Blood Group)                                 | Protein Coding | 46 | GC11M033704 | 9.25  | <a href="https://www.genecards.org/cgi-bin/carddisp.pl?gene=CD59">https://www.genecards.org/cgi-bin/carddisp.pl?gene=CD59</a>         |



|          |                                                     |                |    |             |                                                                                                                                            |
|----------|-----------------------------------------------------|----------------|----|-------------|--------------------------------------------------------------------------------------------------------------------------------------------|
| CLRN1    | Clarin 1                                            | Protein Coding | 35 | GC03M150926 | 9.15 <a href="https://www.genecards.org/cgi-bin/carddisp.pl?gene=CLRN1">https://www.genecards.org/cgi-bin/carddisp.pl?gene=CLRN1</a>       |
| ABCG1    | ATP Binding Cassette Subfamily G Member 1           | Protein Coding | 43 | GC21P042199 | 9.08 <a href="https://www.genecards.org/cgi-bin/carddisp.pl?gene=ABCG1">https://www.genecards.org/cgi-bin/carddisp.pl?gene=ABCG1</a>       |
| NAT2     | N-Acetyltransferase 2                               | Protein Coding | 43 | GC08P018391 | 9.07 <a href="https://www.genecards.org/cgi-bin/carddisp.pl?gene=NAT2">https://www.genecards.org/cgi-bin/carddisp.pl?gene=NAT2</a>         |
| P4HB     | Prolyl 4-Hydroxylase Subunit Beta                   | Protein Coding | 49 | GC17M081843 | 9.07 <a href="https://www.genecards.org/cgi-bin/carddisp.pl?gene=P4HB">https://www.genecards.org/cgi-bin/carddisp.pl?gene=P4HB</a>         |
| GOLM1    | Golgi Membrane Protein 1                            | Protein Coding | 39 | GC09M086026 | 9.06 <a href="https://www.genecards.org/cgi-bin/carddisp.pl?gene=GOLM1">https://www.genecards.org/cgi-bin/carddisp.pl?gene=GOLM1</a>       |
| MAPK9    | Mitogen-Activated Protein Kinase 9                  | Protein Coding | 48 | GC05M180234 | 9.02 <a href="https://www.genecards.org/cgi-bin/carddisp.pl?gene=MAPK9">https://www.genecards.org/cgi-bin/carddisp.pl?gene=MAPK9</a>       |
| LEPQTL1  | Leptin, Serum Levels Of                             | Genetic Locus  | 3  | GC02U903086 | 9.01 <a href="https://www.genecards.org/cgi-bin/carddisp.pl?gene=LEPQTL1">https://www.genecards.org/cgi-bin/carddisp.pl?gene=LEPQTL1</a>   |
| CFLAR    | CASP8 And FADD Like Apoptosis Regulator             | Protein Coding | 46 | GC02P201117 | 9 <a href="https://www.genecards.org/cgi-bin/carddisp.pl?gene=CFLAR">https://www.genecards.org/cgi-bin/carddisp.pl?gene=CFLAR</a>          |
| NPC1L1   | NPC1 Like Intracellular Cholesterol Transporter 1   | Protein Coding | 44 | GC07M044512 | 8.99 <a href="https://www.genecards.org/cgi-bin/carddisp.pl?gene=NPC1L1">https://www.genecards.org/cgi-bin/carddisp.pl?gene=NPC1L1</a>     |
| LGALS3   | Galectin 3                                          | Protein Coding | 44 | GC14P055124 | 8.97 <a href="https://www.genecards.org/cgi-bin/carddisp.pl?gene=LGALS3">https://www.genecards.org/cgi-bin/carddisp.pl?gene=LGALS3</a>     |
| CD14     | CD14 Molecule                                       | Protein Coding | 44 | GC05M140631 | 8.97 <a href="https://www.genecards.org/cgi-bin/carddisp.pl?gene=CD14">https://www.genecards.org/cgi-bin/carddisp.pl?gene=CD14</a>         |
| IL17RA   | Interleukin 17 Receptor A                           | Protein Coding | 44 | GC22P017086 | 8.89 <a href="https://www.genecards.org/cgi-bin/carddisp.pl?gene=IL17RA">https://www.genecards.org/cgi-bin/carddisp.pl?gene=IL17RA</a>     |
| NDUFAB1  | NADH:Ubiquinone Oxidoreductase Subunit AB1          | Protein Coding | 40 | GC16M023582 | 8.85 <a href="https://www.genecards.org/cgi-bin/carddisp.pl?gene=NDUFAB1">https://www.genecards.org/cgi-bin/carddisp.pl?gene=NDUFAB1</a>   |
| AREG     | Amphiregulin                                        | Protein Coding | 43 | GC04P074445 | 8.78 <a href="https://www.genecards.org/cgi-bin/carddisp.pl?gene=AREG">https://www.genecards.org/cgi-bin/carddisp.pl?gene=AREG</a>         |
| FDFT1    | Farnesyl-Diphosphate Farnesyltransferase 1          | Protein Coding | 44 | GC08P011795 | 8.71 <a href="https://www.genecards.org/cgi-bin/carddisp.pl?gene=FDFT1">https://www.genecards.org/cgi-bin/carddisp.pl?gene=FDFT1</a>       |
| DPM1     | Dolichyl-Phosphate Mannosyltransferase Subunit 1, C | Protein Coding | 44 | GC20M050934 | 8.71 <a href="https://www.genecards.org/cgi-bin/carddisp.pl?gene=DPM1">https://www.genecards.org/cgi-bin/carddisp.pl?gene=DPM1</a>         |
| NEAT1    | Nuclear Paraspeckle Assembly Transcript 1           | RNA Gene       | 23 | GC11P065794 | 8.7 <a href="https://www.genecards.org/cgi-bin/carddisp.pl?gene=NEAT1">https://www.genecards.org/cgi-bin/carddisp.pl?gene=NEAT1</a>        |
| TPM3     | Tropomyosin 3                                       | Protein Coding | 47 | GC01M154127 | 8.69 <a href="https://www.genecards.org/cgi-bin/carddisp.pl?gene=TPM3">https://www.genecards.org/cgi-bin/carddisp.pl?gene=TPM3</a>         |
| GABRG2   | Gamma-Aminobutyric Acid Type A Receptor Subunit     | Protein Coding | 46 | GC05P162000 | 8.67 <a href="https://www.genecards.org/cgi-bin/carddisp.pl?gene=GABRG2">https://www.genecards.org/cgi-bin/carddisp.pl?gene=GABRG2</a>     |
| DICER1   | Dicer 1, Ribonuclease III                           | Protein Coding | 47 | GC14M095086 | 8.66 <a href="https://www.genecards.org/cgi-bin/carddisp.pl?gene=DICER1">https://www.genecards.org/cgi-bin/carddisp.pl?gene=DICER1</a>     |
| PLIN2    | Perilipin 2                                         | Protein Coding | 43 | GC09M019115 | 8.64 <a href="https://www.genecards.org/cgi-bin/carddisp.pl?gene=PLIN2">https://www.genecards.org/cgi-bin/carddisp.pl?gene=PLIN2</a>       |
| NLRC4    | NLR Family CARD Domain Containing 4                 | Protein Coding | 44 | GC02M032224 | 8.63 <a href="https://www.genecards.org/cgi-bin/carddisp.pl?gene=NLRC4">https://www.genecards.org/cgi-bin/carddisp.pl?gene=NLRC4</a>       |
| MERTK    | MER Proto-Oncogene, Tyrosine Kinase                 | Protein Coding | 50 | GC02P111898 | 8.62 <a href="https://www.genecards.org/cgi-bin/carddisp.pl?gene=MERTK">https://www.genecards.org/cgi-bin/carddisp.pl?gene=MERTK</a>       |
| KEAP1    | Kelch Like ECH Associated Protein 1                 | Protein Coding | 48 | GC19M010486 | 8.58 <a href="https://www.genecards.org/cgi-bin/carddisp.pl?gene=KEAP1">https://www.genecards.org/cgi-bin/carddisp.pl?gene=KEAP1</a>       |
| ATP5F1E  | ATP Synthase F1 Subunit Epsilon                     | Protein Coding | 32 | GC20M059026 | 8.51 <a href="https://www.genecards.org/cgi-bin/carddisp.pl?gene=ATP5F1E">https://www.genecards.org/cgi-bin/carddisp.pl?gene=ATP5F1E</a>   |
| FOXF1    | Forkhead Box F1                                     | Protein Coding | 41 | GC16P086510 | 8.49 <a href="https://www.genecards.org/cgi-bin/carddisp.pl?gene=FOXF1">https://www.genecards.org/cgi-bin/carddisp.pl?gene=FOXF1</a>       |
| RPS27A   | Ribosomal Protein S27a                              | Protein Coding | 43 | GC02P055231 | 8.47 <a href="https://www.genecards.org/cgi-bin/carddisp.pl?gene=RPS27A">https://www.genecards.org/cgi-bin/carddisp.pl?gene=RPS27A</a>     |
| DHCR24   | 24-Dehydrocholesterol Reductase                     | Protein Coding | 45 | GC01M054849 | 8.47 <a href="https://www.genecards.org/cgi-bin/carddisp.pl?gene=DHCR24">https://www.genecards.org/cgi-bin/carddisp.pl?gene=DHCR24</a>     |
| BIRC3    | Baculoviral IAP Repeat Containing 3                 | Protein Coding | 46 | GC11P102317 | 8.45 <a href="https://www.genecards.org/cgi-bin/carddisp.pl?gene=BIRC3">https://www.genecards.org/cgi-bin/carddisp.pl?gene=BIRC3</a>       |
| ATF6     | Activating Transcription Factor 6                   | Protein Coding | 47 | GC01P161766 | 8.42 <a href="https://www.genecards.org/cgi-bin/carddisp.pl?gene=ATF6">https://www.genecards.org/cgi-bin/carddisp.pl?gene=ATF6</a>         |
| SLC25A12 | Solute Carrier Family 25 Member 12                  | Protein Coding | 46 | GC02M171783 | 8.42 <a href="https://www.genecards.org/cgi-bin/carddisp.pl?gene=SLC25A12">https://www.genecards.org/cgi-bin/carddisp.pl?gene=SLC25A12</a> |
| SLC25A17 | Solute Carrier Family 25 Member 17                  | Protein Coding | 39 | GC22M045405 | 8.39 <a href="https://www.genecards.org/cgi-bin/carddisp.pl?gene=SLC25A17">https://www.genecards.org/cgi-bin/carddisp.pl?gene=SLC25A17</a> |
| HDAC1    | Histone Deacetylase 1                               | Protein Coding | 49 | GC01P032292 | 8.35 <a href="https://www.genecards.org/cgi-bin/carddisp.pl?gene=HDAC1">https://www.genecards.org/cgi-bin/carddisp.pl?gene=HDAC1</a>       |
| UCP3     | Uncoupling Protein 3                                | Protein Coding | 43 | GC11M074000 | 8.32 <a href="https://www.genecards.org/cgi-bin/carddisp.pl?gene=UCP3">https://www.genecards.org/cgi-bin/carddisp.pl?gene=UCP3</a>         |
| FOXC2    | Forkhead Box C2                                     | Protein Coding | 44 | GC16P086567 | 8.32 <a href="https://www.genecards.org/cgi-bin/carddisp.pl?gene=FOXC2">https://www.genecards.org/cgi-bin/carddisp.pl?gene=FOXC2</a>       |
| GSTT1    | Glutathione S-Transferase Theta 1                   | Protein Coding | 32 | GC22Mi00270 | 8.28 <a href="https://www.genecards.org/cgi-bin/carddisp.pl?gene=GSTT1">https://www.genecards.org/cgi-bin/carddisp.pl?gene=GSTT1</a>       |
| PLTP     | Phospholipid Transfer Protein                       | Protein Coding | 43 | GC20M045898 | 8.24 <a href="https://www.genecards.org/cgi-bin/carddisp.pl?gene=PLTP">https://www.genecards.org/cgi-bin/carddisp.pl?gene=PLTP</a>         |
| OGG1     | 8-Oxoguanine DNA Glycosylase                        | Protein Coding | 47 | GC03P009751 | 8.24 <a href="https://www.genecards.org/cgi-bin/carddisp.pl?gene=OGG1">https://www.genecards.org/cgi-bin/carddisp.pl?gene=OGG1</a>         |
| ALAD     | Aminolevulinate Dehydratase                         | Protein Coding | 46 | GC09M113386 | 8.21 <a href="https://www.genecards.org/cgi-bin/carddisp.pl?gene=ALAD">https://www.genecards.org/cgi-bin/carddisp.pl?gene=ALAD</a>         |

|          |                                                     |                |    |             |      |                                                                                                                                       |
|----------|-----------------------------------------------------|----------------|----|-------------|------|---------------------------------------------------------------------------------------------------------------------------------------|
| GABRA2   | Gamma-Aminobutyric Acid Type A Receptor Subunit     | Protein Coding | 45 | GC04M046167 | 8.19 | <a href="https://www.genecards.org/cgi-bin/carddisp.pl?gene=GABRA2">https://www.genecards.org/cgi-bin/carddisp.pl?gene=GABRA2</a>     |
| SULT2A1  | Sulfotransferase Family 2A Member 1                 | Protein Coding | 44 | GC19M047870 | 8.19 | <a href="https://www.genecards.org/cgi-bin/carddisp.pl?gene=SULT2A1">https://www.genecards.org/cgi-bin/carddisp.pl?gene=SULT2A1</a>   |
| DYSF     | Dysferlin                                           | Protein Coding | 43 | GC02P071453 | 8.17 | <a href="https://www.genecards.org/cgi-bin/carddisp.pl?gene=DYSF">https://www.genecards.org/cgi-bin/carddisp.pl?gene=DYSF</a>         |
| KLF6     | Kruppel Like Factor 6                               | Protein Coding | 44 | GC10M003779 | 8.16 | <a href="https://www.genecards.org/cgi-bin/carddisp.pl?gene=KLF6">https://www.genecards.org/cgi-bin/carddisp.pl?gene=KLF6</a>         |
| POSTN    | Periostin                                           | Protein Coding | 43 | GC13M037562 | 8.15 | <a href="https://www.genecards.org/cgi-bin/carddisp.pl?gene=POSTN">https://www.genecards.org/cgi-bin/carddisp.pl?gene=POSTN</a>       |
| IL1RAPL2 | Interleukin 1 Receptor Accessory Protein Like 2     | Protein Coding | 37 | GC0XP104566 | 8.14 | <a href="https://www.genecards.org/cgi-bin/carddisp.pl?gene=IL1RAPL2">https://www.genecards.org/cgi-bin/carddisp.pl?gene=IL1RAPL2</a> |
| SDC1     | Syndecan 1                                          | Protein Coding | 43 | GC02M020200 | 8.08 | <a href="https://www.genecards.org/cgi-bin/carddisp.pl?gene=SDC1">https://www.genecards.org/cgi-bin/carddisp.pl?gene=SDC1</a>         |
| SOST     | Sclerostin                                          | Protein Coding | 44 | GC17M043753 | 8.08 | <a href="https://www.genecards.org/cgi-bin/carddisp.pl?gene=SOST">https://www.genecards.org/cgi-bin/carddisp.pl?gene=SOST</a>         |
| PHB      | Prohibitin                                          | Protein Coding | 47 | GC17M049404 | 8.03 | <a href="https://www.genecards.org/cgi-bin/carddisp.pl?gene=PHB">https://www.genecards.org/cgi-bin/carddisp.pl?gene=PHB</a>           |
| TSPO     | Translocator Protein                                | Protein Coding | 43 | GC22P043151 | 8.02 | <a href="https://www.genecards.org/cgi-bin/carddisp.pl?gene=TSPO">https://www.genecards.org/cgi-bin/carddisp.pl?gene=TSPO</a>         |
| IRF3     | Interferon Regulatory Factor 3                      | Protein Coding | 47 | GC19M049659 | 8.02 | <a href="https://www.genecards.org/cgi-bin/carddisp.pl?gene=IRF3">https://www.genecards.org/cgi-bin/carddisp.pl?gene=IRF3</a>         |
| E2F1     | E2F Transcription Factor 1                          | Protein Coding | 43 | GC20M033675 | 8.02 | <a href="https://www.genecards.org/cgi-bin/carddisp.pl?gene=E2F1">https://www.genecards.org/cgi-bin/carddisp.pl?gene=E2F1</a>         |
| IFNAR1   | Interferon Alpha And Beta Receptor Subunit 1        | Protein Coding | 45 | GC21P033324 | 8.02 | <a href="https://www.genecards.org/cgi-bin/carddisp.pl?gene=IFNAR1">https://www.genecards.org/cgi-bin/carddisp.pl?gene=IFNAR1</a>     |
| PRKCQ    | Protein Kinase C Theta                              | Protein Coding | 49 | GC10M006393 | 8    | <a href="https://www.genecards.org/cgi-bin/carddisp.pl?gene=PRKCQ">https://www.genecards.org/cgi-bin/carddisp.pl?gene=PRKCQ</a>       |
| MIR224   | MicroRNA 224                                        | RNA Gene       | 17 | GC0XM151958 | 7.97 | <a href="https://www.genecards.org/cgi-bin/carddisp.pl?gene=MIR224">https://www.genecards.org/cgi-bin/carddisp.pl?gene=MIR224</a>     |
| EPHX1    | Epoxide Hydrolase 1                                 | Protein Coding | 47 | GC01P225810 | 7.95 | <a href="https://www.genecards.org/cgi-bin/carddisp.pl?gene=EPHX1">https://www.genecards.org/cgi-bin/carddisp.pl?gene=EPHX1</a>       |
| COX4I2   | Cytochrome C Oxidase Subunit 4I2                    | Protein Coding | 41 | GC20P031637 | 7.91 | <a href="https://www.genecards.org/cgi-bin/carddisp.pl?gene=COX4I2">https://www.genecards.org/cgi-bin/carddisp.pl?gene=COX4I2</a>     |
| NR1I3    | Nuclear Receptor Subfamily 1 Group I Member 3       | Protein Coding | 44 | GC01M161229 | 7.87 | <a href="https://www.genecards.org/cgi-bin/carddisp.pl?gene=NR1I3">https://www.genecards.org/cgi-bin/carddisp.pl?gene=NR1I3</a>       |
| MIR423   | MicroRNA 423                                        | RNA Gene       | 18 | GC17P030117 | 7.86 | <a href="https://www.genecards.org/cgi-bin/carddisp.pl?gene=MIR423">https://www.genecards.org/cgi-bin/carddisp.pl?gene=MIR423</a>     |
| COL1A1   | Collagen Type I Alpha 1 Chain                       | Protein Coding | 50 | GC17M050183 | 7.86 | <a href="https://www.genecards.org/cgi-bin/carddisp.pl?gene=COL1A1">https://www.genecards.org/cgi-bin/carddisp.pl?gene=COL1A1</a>     |
| TFEB     | Transcription Factor EB                             | Protein Coding | 42 | GC06M042295 | 7.82 | <a href="https://www.genecards.org/cgi-bin/carddisp.pl?gene=TFEB">https://www.genecards.org/cgi-bin/carddisp.pl?gene=TFEB</a>         |
| GOT2     | Glutamic-Oxaloacetic Transaminase 2                 | Protein Coding | 45 | GC16M058707 | 7.8  | <a href="https://www.genecards.org/cgi-bin/carddisp.pl?gene=GOT2">https://www.genecards.org/cgi-bin/carddisp.pl?gene=GOT2</a>         |
| MLN      | Motilin                                             | Protein Coding | 35 | GC06M033794 | 7.8  | <a href="https://www.genecards.org/cgi-bin/carddisp.pl?gene=MLN">https://www.genecards.org/cgi-bin/carddisp.pl?gene=MLN</a>           |
| CD68     | CD68 Molecule                                       | Protein Coding | 40 | GC17P007579 | 7.78 | <a href="https://www.genecards.org/cgi-bin/carddisp.pl?gene=CD68">https://www.genecards.org/cgi-bin/carddisp.pl?gene=CD68</a>         |
| IL33     | Interleukin 33                                      | Protein Coding | 40 | GC09P006206 | 7.78 | <a href="https://www.genecards.org/cgi-bin/carddisp.pl?gene=IL33">https://www.genecards.org/cgi-bin/carddisp.pl?gene=IL33</a>         |
| RPS6KA3  | Ribosomal Protein S6 Kinase A3                      | Protein Coding | 52 | GC0XM020149 | 7.77 | <a href="https://www.genecards.org/cgi-bin/carddisp.pl?gene=RPS6KA3">https://www.genecards.org/cgi-bin/carddisp.pl?gene=RPS6KA3</a>   |
| LPIN1    | Lipin 1                                             | Protein Coding | 48 | GC02P011649 | 7.76 | <a href="https://www.genecards.org/cgi-bin/carddisp.pl?gene=LPIN1">https://www.genecards.org/cgi-bin/carddisp.pl?gene=LPIN1</a>       |
| SFRP4    | Secreted Frizzled Related Protein 4                 | Protein Coding | 43 | GC07M037912 | 7.76 | <a href="https://www.genecards.org/cgi-bin/carddisp.pl?gene=SFRP4">https://www.genecards.org/cgi-bin/carddisp.pl?gene=SFRP4</a>       |
| UQCRRFS1 | Ubiquinol-Cytochrome C Reductase, Rieske Iron-Sulfu | Protein Coding | 45 | GC19M029205 | 7.74 | <a href="https://www.genecards.org/cgi-bin/carddisp.pl?gene=UQCRRFS1">https://www.genecards.org/cgi-bin/carddisp.pl?gene=UQCRRFS1</a> |
| SERPINA7 | Serpin Family A Member 7                            | Protein Coding | 39 | GC0XM106032 | 7.72 | <a href="https://www.genecards.org/cgi-bin/carddisp.pl?gene=SERPINA7">https://www.genecards.org/cgi-bin/carddisp.pl?gene=SERPINA7</a> |
| TRAF3IP2 | TRAF3 Interacting Protein 2                         | Protein Coding | 43 | GC06M111555 | 7.69 | <a href="https://www.genecards.org/cgi-bin/carddisp.pl?gene=TRAF3IP2">https://www.genecards.org/cgi-bin/carddisp.pl?gene=TRAF3IP2</a> |
| AXL      | AXL Receptor Tyrosine Kinase                        | Protein Coding | 51 | GC19P041219 | 7.67 | <a href="https://www.genecards.org/cgi-bin/carddisp.pl?gene=AXL">https://www.genecards.org/cgi-bin/carddisp.pl?gene=AXL</a>           |
| ANXA2    | Annexin A2                                          | Protein Coding | 48 | GC15M060347 | 7.67 | <a href="https://www.genecards.org/cgi-bin/carddisp.pl?gene=ANXA2">https://www.genecards.org/cgi-bin/carddisp.pl?gene=ANXA2</a>       |
| CCR1     | C-C Motif Chemokine Receptor 1                      | Protein Coding | 45 | GC03M046218 | 7.65 | <a href="https://www.genecards.org/cgi-bin/carddisp.pl?gene=CCR1">https://www.genecards.org/cgi-bin/carddisp.pl?gene=CCR1</a>         |
| RPL5     | Ribosomal Protein L5                                | Protein Coding | 47 | GC01P092832 | 7.65 | <a href="https://www.genecards.org/cgi-bin/carddisp.pl?gene=RPL5">https://www.genecards.org/cgi-bin/carddisp.pl?gene=RPL5</a>         |
| GGT2     | Gamma-Glutamyltransferase 2                         | Protein Coding | 31 | GC22M021207 | 7.64 | <a href="https://www.genecards.org/cgi-bin/carddisp.pl?gene=GGT2">https://www.genecards.org/cgi-bin/carddisp.pl?gene=GGT2</a>         |
| BID      | BH3 Interacting Domain Death Agonist                | Protein Coding | 45 | GC22M017734 | 7.63 | <a href="https://www.genecards.org/cgi-bin/carddisp.pl?gene=BID">https://www.genecards.org/cgi-bin/carddisp.pl?gene=BID</a>           |
| IL18BP   | Interleukin 18 Binding Protein                      | Protein Coding | 39 | GC11P071998 | 7.61 | <a href="https://www.genecards.org/cgi-bin/carddisp.pl?gene=IL18BP">https://www.genecards.org/cgi-bin/carddisp.pl?gene=IL18BP</a>     |
| NTS      | Neurotensin                                         | Protein Coding | 40 | GC12P085876 | 7.6  | <a href="https://www.genecards.org/cgi-bin/carddisp.pl?gene=NTS">https://www.genecards.org/cgi-bin/carddisp.pl?gene=NTS</a>           |

|          |                                                         |                |    |             |      |                                                                                                                                       |
|----------|---------------------------------------------------------|----------------|----|-------------|------|---------------------------------------------------------------------------------------------------------------------------------------|
| ACACB    | Acetyl-CoA Carboxylase Beta                             | Protein Coding | 45 | GC12P109116 | 7.6  | <a href="https://www.genecards.org/cgi-bin/carddisp.pl?gene=ACACB">https://www.genecards.org/cgi-bin/carddisp.pl?gene=ACACB</a>       |
| GPC4     | Glypican 4                                              | Protein Coding | 45 | GC0XM133300 | 7.54 | <a href="https://www.genecards.org/cgi-bin/carddisp.pl?gene=GPC4">https://www.genecards.org/cgi-bin/carddisp.pl?gene=GPC4</a>         |
| MAP3K11  | Mitogen-Activated Protein Kinase Kinase Kinase 11       | Protein Coding | 46 | GC11M065598 | 7.5  | <a href="https://www.genecards.org/cgi-bin/carddisp.pl?gene=MAP3K11">https://www.genecards.org/cgi-bin/carddisp.pl?gene=MAP3K11</a>   |
| SLC39A14 | Solute Carrier Family 39 Member 14                      | Protein Coding | 43 | GC08P022367 | 7.49 | <a href="https://www.genecards.org/cgi-bin/carddisp.pl?gene=SLC39A14">https://www.genecards.org/cgi-bin/carddisp.pl?gene=SLC39A14</a> |
| CYP2B6   | Cytochrome P450 Family 2 Subfamily B Member 6           | Protein Coding | 47 | GC19P040991 | 7.48 | <a href="https://www.genecards.org/cgi-bin/carddisp.pl?gene=CYP2B6">https://www.genecards.org/cgi-bin/carddisp.pl?gene=CYP2B6</a>     |
| CCL20    | C-C Motif Chemokine Ligand 20                           | Protein Coding | 43 | GC02P227813 | 7.46 | <a href="https://www.genecards.org/cgi-bin/carddisp.pl?gene=CCL20">https://www.genecards.org/cgi-bin/carddisp.pl?gene=CCL20</a>       |
| SLC39A4  | Solute Carrier Family 39 Member 4                       | Protein Coding | 43 | GC08M144409 | 7.44 | <a href="https://www.genecards.org/cgi-bin/carddisp.pl?gene=SLC39A4">https://www.genecards.org/cgi-bin/carddisp.pl?gene=SLC39A4</a>   |
| NDUFB10  | NADH:Ubiquinone Oxidoreductase Subunit B10              | Protein Coding | 41 | GC16P002430 | 7.43 | <a href="https://www.genecards.org/cgi-bin/carddisp.pl?gene=NDUFB10">https://www.genecards.org/cgi-bin/carddisp.pl?gene=NDUFB10</a>   |
| FTO      | FTO Alpha-Ketoglutarate Dependent Dioxygenase           | Protein Coding | 44 | GC16P053737 | 7.4  | <a href="https://www.genecards.org/cgi-bin/carddisp.pl?gene=FTO">https://www.genecards.org/cgi-bin/carddisp.pl?gene=FTO</a>           |
| TYSND1   | Trypsin Domain Containing 1                             | Protein Coding | 34 | GC10M070137 | 7.39 | <a href="https://www.genecards.org/cgi-bin/carddisp.pl?gene=TYSND1">https://www.genecards.org/cgi-bin/carddisp.pl?gene=TYSND1</a>     |
| GFPT1    | Glutamine--Fructose-6-Phosphate Transaminase 1          | Protein Coding | 46 | GC02M069283 | 7.37 | <a href="https://www.genecards.org/cgi-bin/carddisp.pl?gene=GFPT1">https://www.genecards.org/cgi-bin/carddisp.pl?gene=GFPT1</a>       |
| CXCR5    | C-X-C Motif Chemokine Receptor 5                        | Protein Coding | 41 | GC11P118898 | 7.36 | <a href="https://www.genecards.org/cgi-bin/carddisp.pl?gene=CXCR5">https://www.genecards.org/cgi-bin/carddisp.pl?gene=CXCR5</a>       |
| ANGPTL8  | Angiopoietin Like 8                                     | Protein Coding | 28 | GC19P011238 | 7.36 | <a href="https://www.genecards.org/cgi-bin/carddisp.pl?gene=ANGPTL8">https://www.genecards.org/cgi-bin/carddisp.pl?gene=ANGPTL8</a>   |
| CYP4A11  | Cytochrome P450 Family 4 Subfamily A Member 11          | Protein Coding | 43 | GC01M046929 | 7.34 | <a href="https://www.genecards.org/cgi-bin/carddisp.pl?gene=CYP4A11">https://www.genecards.org/cgi-bin/carddisp.pl?gene=CYP4A11</a>   |
| IARS1    | Isoleucyl-tRNA Synthetase 1                             | Protein Coding | 35 | GC09M092211 | 7.28 | <a href="https://www.genecards.org/cgi-bin/carddisp.pl?gene=IARS1">https://www.genecards.org/cgi-bin/carddisp.pl?gene=IARS1</a>       |
| ABCC3    | ATP Binding Cassette Subfamily C Member 3               | Protein Coding | 45 | GC17P050634 | 7.27 | <a href="https://www.genecards.org/cgi-bin/carddisp.pl?gene=ABCC3">https://www.genecards.org/cgi-bin/carddisp.pl?gene=ABCC3</a>       |
| EIF2AK2  | Eukaryotic Translation Initiation Factor 2 Alpha Kinase | Protein Coding | 45 | GC02M037099 | 7.24 | <a href="https://www.genecards.org/cgi-bin/carddisp.pl?gene=EIF2AK2">https://www.genecards.org/cgi-bin/carddisp.pl?gene=EIF2AK2</a>   |
| DNAH11   | Dynein Axonemal Heavy Chain 11                          | Protein Coding | 41 | GC07P021543 | 7.22 | <a href="https://www.genecards.org/cgi-bin/carddisp.pl?gene=DNAH11">https://www.genecards.org/cgi-bin/carddisp.pl?gene=DNAH11</a>     |
| COX7B    | Cytochrome C Oxidase Subunit 7B                         | Protein Coding | 40 | GC0XP077899 | 7.22 | <a href="https://www.genecards.org/cgi-bin/carddisp.pl?gene=COX7B">https://www.genecards.org/cgi-bin/carddisp.pl?gene=COX7B</a>       |
| BCL2L11  | BCL2 Like 11                                            | Protein Coding | 45 | GC02P111119 | 7.21 | <a href="https://www.genecards.org/cgi-bin/carddisp.pl?gene=BCL2L11">https://www.genecards.org/cgi-bin/carddisp.pl?gene=BCL2L11</a>   |
| SAMM50   | SAMM50 Sorting And Assembly Machinery Component         | Protein Coding | 37 | GC22P043955 | 7.2  | <a href="https://www.genecards.org/cgi-bin/carddisp.pl?gene=SAMM50">https://www.genecards.org/cgi-bin/carddisp.pl?gene=SAMM50</a>     |
| ATP2A2   | ATPase Sarcoplasmic/Endoplasmic Reticulum Ca2+ T        | Protein Coding | 51 | GC12P110280 | 7.16 | <a href="https://www.genecards.org/cgi-bin/carddisp.pl?gene=ATP2A2">https://www.genecards.org/cgi-bin/carddisp.pl?gene=ATP2A2</a>     |
| PARVB    | Parvin Beta                                             | Protein Coding | 39 | GC22P043999 | 7.16 | <a href="https://www.genecards.org/cgi-bin/carddisp.pl?gene=PARVB">https://www.genecards.org/cgi-bin/carddisp.pl?gene=PARVB</a>       |
| PHGDH    | Phosphoglycerate Dehydrogenase                          | Protein Coding | 49 | GC01P119660 | 7.14 | <a href="https://www.genecards.org/cgi-bin/carddisp.pl?gene=PHGDH">https://www.genecards.org/cgi-bin/carddisp.pl?gene=PHGDH</a>       |
| DARS1    | Aspartyl-tRNA Synthetase 1                              | Protein Coding | 36 | GC02M135905 | 7.12 | <a href="https://www.genecards.org/cgi-bin/carddisp.pl?gene=DARS1">https://www.genecards.org/cgi-bin/carddisp.pl?gene=DARS1</a>       |
| EGR1     | Early Growth Response 1                                 | Protein Coding | 44 | GC05P138465 | 7.1  | <a href="https://www.genecards.org/cgi-bin/carddisp.pl?gene=EGR1">https://www.genecards.org/cgi-bin/carddisp.pl?gene=EGR1</a>         |
| ENPP2    | Ectonucleotide Pyrophosphatase/Phosphodiesterase 2      | Protein Coding | 44 | GC08M119556 | 7.08 | <a href="https://www.genecards.org/cgi-bin/carddisp.pl?gene=ENPP2">https://www.genecards.org/cgi-bin/carddisp.pl?gene=ENPP2</a>       |
| UFM1     | Ubiquitin Fold Modifier 1                               | Protein Coding | 40 | GC13P038349 | 7.07 | <a href="https://www.genecards.org/cgi-bin/carddisp.pl?gene=UFM1">https://www.genecards.org/cgi-bin/carddisp.pl?gene=UFM1</a>         |
| GLP1R    | Glucagon Like Peptide 1 Receptor                        | Protein Coding | 46 | GC06P039048 | 7.06 | <a href="https://www.genecards.org/cgi-bin/carddisp.pl?gene=GLP1R">https://www.genecards.org/cgi-bin/carddisp.pl?gene=GLP1R</a>       |
| NDUFA4   | NDUFA4 Mitochondrial Complex Associated                 | Protein Coding | 42 | GC07M010938 | 6.99 | <a href="https://www.genecards.org/cgi-bin/carddisp.pl?gene=NDUFA4">https://www.genecards.org/cgi-bin/carddisp.pl?gene=NDUFA4</a>     |
| TGM2     | Transglutaminase 2                                      | Protein Coding | 48 | GC20M038127 | 6.96 | <a href="https://www.genecards.org/cgi-bin/carddisp.pl?gene=TGM2">https://www.genecards.org/cgi-bin/carddisp.pl?gene=TGM2</a>         |
| IL6ST    | Interleukin 6 Signal Transducer                         | Protein Coding | 45 | GC05M055935 | 6.96 | <a href="https://www.genecards.org/cgi-bin/carddisp.pl?gene=IL6ST">https://www.genecards.org/cgi-bin/carddisp.pl?gene=IL6ST</a>       |
| TBP      | TATA-Box Binding Protein                                | Protein Coding | 48 | GC06P170554 | 6.95 | <a href="https://www.genecards.org/cgi-bin/carddisp.pl?gene=TBP">https://www.genecards.org/cgi-bin/carddisp.pl?gene=TBP</a>           |
| TRIB1    | Tribbles Pseudokinase 1                                 | Protein Coding | 37 | GC08P125430 | 6.94 | <a href="https://www.genecards.org/cgi-bin/carddisp.pl?gene=TRIB1">https://www.genecards.org/cgi-bin/carddisp.pl?gene=TRIB1</a>       |
| COL12A1  | Collagen Type XII Alpha 1 Chain                         | Protein Coding | 41 | GC06M075084 | 6.92 | <a href="https://www.genecards.org/cgi-bin/carddisp.pl?gene=COL12A1">https://www.genecards.org/cgi-bin/carddisp.pl?gene=COL12A1</a>   |
| CNR2     | Cannabinoid Receptor 2                                  | Protein Coding | 45 | GC01M023870 | 6.92 | <a href="https://www.genecards.org/cgi-bin/carddisp.pl?gene=CNR2">https://www.genecards.org/cgi-bin/carddisp.pl?gene=CNR2</a>         |
| CANX     | Calnexin                                                | Protein Coding | 44 | GC05P179678 | 6.92 | <a href="https://www.genecards.org/cgi-bin/carddisp.pl?gene=CANX">https://www.genecards.org/cgi-bin/carddisp.pl?gene=CANX</a>         |
| MYH14    | Myosin Heavy Chain 14                                   | Protein Coding | 45 | GC19P050192 | 6.85 | <a href="https://www.genecards.org/cgi-bin/carddisp.pl?gene=MYH14">https://www.genecards.org/cgi-bin/carddisp.pl?gene=MYH14</a>       |
| LOXL2    | Lysyl Oxidase Like 2                                    | Protein Coding | 44 | GC08M023296 | 6.84 | <a href="https://www.genecards.org/cgi-bin/carddisp.pl?gene=LOXL2">https://www.genecards.org/cgi-bin/carddisp.pl?gene=LOXL2</a>       |

|          |                                                    |                |    |             |      |                                                                                                                                       |
|----------|----------------------------------------------------|----------------|----|-------------|------|---------------------------------------------------------------------------------------------------------------------------------------|
| AOC3     | Amine Oxidase Copper Containing 3                  | Protein Coding | 44 | GC17P042851 | 6.8  | <a href="https://www.genecards.org/cgi-bin/carddisp.pl?gene=AOC3">https://www.genecards.org/cgi-bin/carddisp.pl?gene=AOC3</a>         |
| SAR1A    | Secretion Associated Ras Related GTPase 1A         | Protein Coding | 41 | GC10M070147 | 6.8  | <a href="https://www.genecards.org/cgi-bin/carddisp.pl?gene=SAR1A">https://www.genecards.org/cgi-bin/carddisp.pl?gene=SAR1A</a>       |
| ASCL1    | Achaete-Scute Family BHLH Transcription Factor 1   | Protein Coding | 44 | GC12P102957 | 6.79 | <a href="https://www.genecards.org/cgi-bin/carddisp.pl?gene=ASCL1">https://www.genecards.org/cgi-bin/carddisp.pl?gene=ASCL1</a>       |
| ACSM2B   | Acyl-CoA Synthetase Medium Chain Family Member     | Protein Coding | 36 | GC16M020547 | 6.76 | <a href="https://www.genecards.org/cgi-bin/carddisp.pl?gene=ACSM2B">https://www.genecards.org/cgi-bin/carddisp.pl?gene=ACSM2B</a>     |
| RPS17    | Ribosomal Protein S17                              | Protein Coding | 42 | GC15M082536 | 6.75 | <a href="https://www.genecards.org/cgi-bin/carddisp.pl?gene=RPS17">https://www.genecards.org/cgi-bin/carddisp.pl?gene=RPS17</a>       |
| DRD4     | Dopamine Receptor D4                               | Protein Coding | 46 | GC11P000660 | 6.75 | <a href="https://www.genecards.org/cgi-bin/carddisp.pl?gene=DRD4">https://www.genecards.org/cgi-bin/carddisp.pl?gene=DRD4</a>         |
| CEBPB    | CCAAT Enhancer Binding Protein Beta                | Protein Coding | 43 | GC20P050190 | 6.75 | <a href="https://www.genecards.org/cgi-bin/carddisp.pl?gene=CEBPB">https://www.genecards.org/cgi-bin/carddisp.pl?gene=CEBPB</a>       |
| PTX3     | Pentraxin 3                                        | Protein Coding | 41 | GC03P157436 | 6.71 | <a href="https://www.genecards.org/cgi-bin/carddisp.pl?gene=PTX3">https://www.genecards.org/cgi-bin/carddisp.pl?gene=PTX3</a>         |
| OPRM1    | Opioid Receptor Mu 1                               | Protein Coding | 48 | GC06P154075 | 6.69 | <a href="https://www.genecards.org/cgi-bin/carddisp.pl?gene=OPRM1">https://www.genecards.org/cgi-bin/carddisp.pl?gene=OPRM1</a>       |
| OLR1     | Oxidized Low Density Lipoprotein Receptor 1        | Protein Coding | 44 | GC12M013864 | 6.68 | <a href="https://www.genecards.org/cgi-bin/carddisp.pl?gene=OLR1">https://www.genecards.org/cgi-bin/carddisp.pl?gene=OLR1</a>         |
| DCLK1    | Doublecortin Like Kinase 1                         | Protein Coding | 43 | GC13M035768 | 6.66 | <a href="https://www.genecards.org/cgi-bin/carddisp.pl?gene=DCLK1">https://www.genecards.org/cgi-bin/carddisp.pl?gene=DCLK1</a>       |
| DBH      | Dopamine Beta-Hydroxylase                          | Protein Coding | 50 | GC09P133636 | 6.66 | <a href="https://www.genecards.org/cgi-bin/carddisp.pl?gene=DBH">https://www.genecards.org/cgi-bin/carddisp.pl?gene=DBH</a>           |
| POR      | Cytochrome P450 Oxidoreductase                     | Protein Coding | 48 | GC07P075899 | 6.62 | <a href="https://www.genecards.org/cgi-bin/carddisp.pl?gene=POR">https://www.genecards.org/cgi-bin/carddisp.pl?gene=POR</a>           |
| GSK3A    | Glycogen Synthase Kinase 3 Alpha                   | Protein Coding | 48 | GC19M042230 | 6.61 | <a href="https://www.genecards.org/cgi-bin/carddisp.pl?gene=GSK3A">https://www.genecards.org/cgi-bin/carddisp.pl?gene=GSK3A</a>       |
| HDAC9    | Histone Deacetylase 9                              | Protein Coding | 46 | GC07P018086 | 6.61 | <a href="https://www.genecards.org/cgi-bin/carddisp.pl?gene=HDAC9">https://www.genecards.org/cgi-bin/carddisp.pl?gene=HDAC9</a>       |
| OGT      | O-Linked N-Acetylglucosamine (GlcNAc) Transferase  | Protein Coding | 44 | GC0XP071534 | 6.6  | <a href="https://www.genecards.org/cgi-bin/carddisp.pl?gene=OGT">https://www.genecards.org/cgi-bin/carddisp.pl?gene=OGT</a>           |
| EPHX2    | Epoxide Hydrolase 2                                | Protein Coding | 47 | GC08P027490 | 6.55 | <a href="https://www.genecards.org/cgi-bin/carddisp.pl?gene=EPHX2">https://www.genecards.org/cgi-bin/carddisp.pl?gene=EPHX2</a>       |
| STING1   | Stimulator Of Interferon Response CGAMP Interactor | Protein Coding | 34 | GC05M139476 | 6.5  | <a href="https://www.genecards.org/cgi-bin/carddisp.pl?gene=STING1">https://www.genecards.org/cgi-bin/carddisp.pl?gene=STING1</a>     |
| IGF2BP2  | Insulin Like Growth Factor 2 mRNA Binding Protein  | Protein Coding | 44 | GC03M185643 | 6.49 | <a href="https://www.genecards.org/cgi-bin/carddisp.pl?gene=IGF2BP2">https://www.genecards.org/cgi-bin/carddisp.pl?gene=IGF2BP2</a>   |
| SERPINB3 | Serpin Family B Member 3                           | Protein Coding | 42 | GC18M063655 | 6.48 | <a href="https://www.genecards.org/cgi-bin/carddisp.pl?gene=SERPINB3">https://www.genecards.org/cgi-bin/carddisp.pl?gene=SERPINB3</a> |
| NCAN     | Neurocan                                           | Protein Coding | 41 | GC19P023336 | 6.44 | <a href="https://www.genecards.org/cgi-bin/carddisp.pl?gene=NCAN">https://www.genecards.org/cgi-bin/carddisp.pl?gene=NCAN</a>         |
| FFAR4    | Free Fatty Acid Receptor 4                         | Protein Coding | 38 | GC10P093566 | 6.42 | <a href="https://www.genecards.org/cgi-bin/carddisp.pl?gene=FFAR4">https://www.genecards.org/cgi-bin/carddisp.pl?gene=FFAR4</a>       |
| SPTAN1   | Spectrin Alpha, Non-Erythrocytic 1                 | Protein Coding | 47 | GC09P128552 | 6.4  | <a href="https://www.genecards.org/cgi-bin/carddisp.pl?gene=SPTAN1">https://www.genecards.org/cgi-bin/carddisp.pl?gene=SPTAN1</a>     |
| MATN3    | Matrilin 3                                         | Protein Coding | 43 | GC02M019992 | 6.39 | <a href="https://www.genecards.org/cgi-bin/carddisp.pl?gene=MATN3">https://www.genecards.org/cgi-bin/carddisp.pl?gene=MATN3</a>       |
| SRD5A2   | Steroid 5 Alpha-Reductase 2                        | Protein Coding | 43 | GC02M031522 | 6.34 | <a href="https://www.genecards.org/cgi-bin/carddisp.pl?gene=SRD5A2">https://www.genecards.org/cgi-bin/carddisp.pl?gene=SRD5A2</a>     |
| ITGA8    | Integrin Subunit Alpha 8                           | Protein Coding | 42 | GC10M015513 | 6.34 | <a href="https://www.genecards.org/cgi-bin/carddisp.pl?gene=ITGA8">https://www.genecards.org/cgi-bin/carddisp.pl?gene=ITGA8</a>       |
| RPS3A    | Ribosomal Protein S3A                              | Protein Coding | 41 | GC04P151099 | 6.31 | <a href="https://www.genecards.org/cgi-bin/carddisp.pl?gene=RPS3A">https://www.genecards.org/cgi-bin/carddisp.pl?gene=RPS3A</a>       |
| SLC25A1  | Solute Carrier Family 25 Member 1                  | Protein Coding | 46 | GC22M019176 | 6.3  | <a href="https://www.genecards.org/cgi-bin/carddisp.pl?gene=SLC25A1">https://www.genecards.org/cgi-bin/carddisp.pl?gene=SLC25A1</a>   |
| PTPRD    | Protein Tyrosine Phosphatase Receptor Type D       | Protein Coding | 44 | GC09M008307 | 6.27 | <a href="https://www.genecards.org/cgi-bin/carddisp.pl?gene=PTPRD">https://www.genecards.org/cgi-bin/carddisp.pl?gene=PTPRD</a>       |
| ALDH9A1  | Aldehyde Dehydrogenase 9 Family Member A1          | Protein Coding | 41 | GC01M165667 | 6.26 | <a href="https://www.genecards.org/cgi-bin/carddisp.pl?gene=ALDH9A1">https://www.genecards.org/cgi-bin/carddisp.pl?gene=ALDH9A1</a>   |
| PDXK     | Pyridoxal Kinase                                   | Protein Coding | 47 | GC21P043719 | 6.24 | <a href="https://www.genecards.org/cgi-bin/carddisp.pl?gene=PDXK">https://www.genecards.org/cgi-bin/carddisp.pl?gene=PDXK</a>         |
| TXNRD2   | Thioredoxin Reductase 2                            | Protein Coding | 46 | GC22M019863 | 6.23 | <a href="https://www.genecards.org/cgi-bin/carddisp.pl?gene=TXNRD2">https://www.genecards.org/cgi-bin/carddisp.pl?gene=TXNRD2</a>     |
| MATR3    | Matrin 3                                           | Protein Coding | 41 | GC05P139274 | 6.22 | <a href="https://www.genecards.org/cgi-bin/carddisp.pl?gene=MATR3">https://www.genecards.org/cgi-bin/carddisp.pl?gene=MATR3</a>       |
| TXN      | Thioredoxin                                        | Protein Coding | 45 | GC09M110243 | 6.22 | <a href="https://www.genecards.org/cgi-bin/carddisp.pl?gene=TXN">https://www.genecards.org/cgi-bin/carddisp.pl?gene=TXN</a>           |
| SLC1A3   | Solute Carrier Family 1 Member 3                   | Protein Coding | 50 | GC05P036606 | 6.21 | <a href="https://www.genecards.org/cgi-bin/carddisp.pl?gene=SLC1A3">https://www.genecards.org/cgi-bin/carddisp.pl?gene=SLC1A3</a>     |
| IL16     | Interleukin 16                                     | Protein Coding | 42 | GC15P081159 | 6.19 | <a href="https://www.genecards.org/cgi-bin/carddisp.pl?gene=IL16">https://www.genecards.org/cgi-bin/carddisp.pl?gene=IL16</a>         |
| SF3B1    | Splicing Factor 3b Subunit 1                       | Protein Coding | 44 | GC02M197389 | 6.18 | <a href="https://www.genecards.org/cgi-bin/carddisp.pl?gene=SF3B1">https://www.genecards.org/cgi-bin/carddisp.pl?gene=SF3B1</a>       |
| TRAF2    | TNF Receptor Associated Factor 2                   | Protein Coding | 44 | GC09P136881 | 6.18 | <a href="https://www.genecards.org/cgi-bin/carddisp.pl?gene=TRAF2">https://www.genecards.org/cgi-bin/carddisp.pl?gene=TRAF2</a>       |
| CPB2     | Carboxypeptidase B2                                | Protein Coding | 44 | GC13M046053 | 6.16 | <a href="https://www.genecards.org/cgi-bin/carddisp.pl?gene=CPB2">https://www.genecards.org/cgi-bin/carddisp.pl?gene=CPB2</a>         |

|         |                                                                     |                |    |             |                                                                                                                                          |
|---------|---------------------------------------------------------------------|----------------|----|-------------|------------------------------------------------------------------------------------------------------------------------------------------|
| ATP1A1  | ATPase Na <sup>+</sup> /K <sup>+</sup> Transporting Subunit Alpha 1 | Protein Coding | 49 | GC01P116372 | 6.16 <a href="https://www.genecards.org/cgi-bin/carddisp.pl?gene=ATP1A1">https://www.genecards.org/cgi-bin/carddisp.pl?gene=ATP1A1</a>   |
| TKT     | Transketolase                                                       | Protein Coding | 46 | GC03M053224 | 6.15 <a href="https://www.genecards.org/cgi-bin/carddisp.pl?gene=TKT">https://www.genecards.org/cgi-bin/carddisp.pl?gene=TKT</a>         |
| MBOAT7  | Membrane Bound O-Acyltransferase Domain Containi                    | Protein Coding | 40 | GC19M054173 | 6.12 <a href="https://www.genecards.org/cgi-bin/carddisp.pl?gene=MBOAT7">https://www.genecards.org/cgi-bin/carddisp.pl?gene=MBOAT7</a>   |
| COL13A1 | Collagen Type XIII Alpha 1 Chain                                    | Protein Coding | 41 | GC10P069801 | 6.12 <a href="https://www.genecards.org/cgi-bin/carddisp.pl?gene=COL13A1">https://www.genecards.org/cgi-bin/carddisp.pl?gene=COL13A1</a> |
| GCLC    | Glutamate-Cysteine Ligase Catalytic Subunit                         | Protein Coding | 43 | GC06M053497 | 6.1 <a href="https://www.genecards.org/cgi-bin/carddisp.pl?gene=GCLC">https://www.genecards.org/cgi-bin/carddisp.pl?gene=GCLC</a>        |
| PDGFA   | Platelet Derived Growth Factor Subunit A                            | Protein Coding | 44 | GC07M000497 | 6.09 <a href="https://www.genecards.org/cgi-bin/carddisp.pl?gene=PDGFA">https://www.genecards.org/cgi-bin/carddisp.pl?gene=PDGFA</a>     |
| SCAP    | SREBF Chaperone                                                     | Protein Coding | 41 | GC03M047413 | 6.08 <a href="https://www.genecards.org/cgi-bin/carddisp.pl?gene=SCAP">https://www.genecards.org/cgi-bin/carddisp.pl?gene=SCAP</a>       |
| PKM     | Pyruvate Kinase M1/2                                                | Protein Coding | 45 | GC15M072199 | 6.05 <a href="https://www.genecards.org/cgi-bin/carddisp.pl?gene=PKM">https://www.genecards.org/cgi-bin/carddisp.pl?gene=PKM</a>         |
| KHK     | Ketohexokinase                                                      | Protein Coding | 44 | GC02P027086 | 6.05 <a href="https://www.genecards.org/cgi-bin/carddisp.pl?gene=KHK">https://www.genecards.org/cgi-bin/carddisp.pl?gene=KHK</a>         |
| RUNX3   | RUNX Family Transcription Factor 3                                  | Protein Coding | 43 | GC01M024899 | 6.05 <a href="https://www.genecards.org/cgi-bin/carddisp.pl?gene=RUNX3">https://www.genecards.org/cgi-bin/carddisp.pl?gene=RUNX3</a>     |
| ERLIN1  | ER Lipid Raft Associated 1                                          | Protein Coding | 41 | GC10M100150 | 6.05 <a href="https://www.genecards.org/cgi-bin/carddisp.pl?gene=ERLIN1">https://www.genecards.org/cgi-bin/carddisp.pl?gene=ERLIN1</a>   |
| IMMT    | Inner Membrane Mitochondrial Protein                                | Protein Coding | 39 | GC02M086144 | 6.04 <a href="https://www.genecards.org/cgi-bin/carddisp.pl?gene=IMMT">https://www.genecards.org/cgi-bin/carddisp.pl?gene=IMMT</a>       |
| A2M     | Alpha-2-Macroglobulin                                               | Protein Coding | 45 | GC12M009067 | 6.02 <a href="https://www.genecards.org/cgi-bin/carddisp.pl?gene=A2M">https://www.genecards.org/cgi-bin/carddisp.pl?gene=A2M</a>         |
| ERLIN2  | ER Lipid Raft Associated 2                                          | Protein Coding | 40 | GC08P037736 | 6.01 <a href="https://www.genecards.org/cgi-bin/carddisp.pl?gene=ERLIN2">https://www.genecards.org/cgi-bin/carddisp.pl?gene=ERLIN2</a>   |
| FST     | Follistatin                                                         | Protein Coding | 46 | GC05P053480 | 6 <a href="https://www.genecards.org/cgi-bin/carddisp.pl?gene=FST">https://www.genecards.org/cgi-bin/carddisp.pl?gene=FST</a>            |
| ALOX12  | Arachidonate 12-Lipoxygenase, 12S Type                              | Protein Coding | 43 | GC17P006995 | 5.99 <a href="https://www.genecards.org/cgi-bin/carddisp.pl?gene=ALOX12">https://www.genecards.org/cgi-bin/carddisp.pl?gene=ALOX12</a>   |
| RB1CC1  | RB1 Inducible Coiled-Coil 1                                         | Protein Coding | 42 | GC08M052622 | 5.96 <a href="https://www.genecards.org/cgi-bin/carddisp.pl?gene=RB1CC1">https://www.genecards.org/cgi-bin/carddisp.pl?gene=RB1CC1</a>   |
| IRGM    | Immunity Related GTPase M                                           | Protein Coding | 38 | GC05P150846 | 5.93 <a href="https://www.genecards.org/cgi-bin/carddisp.pl?gene=IRGM">https://www.genecards.org/cgi-bin/carddisp.pl?gene=IRGM</a>       |
| CYP4F2  | Cytochrome P450 Family 4 Subfamily F Member 2                       | Protein Coding | 44 | GC19M015878 | 5.91 <a href="https://www.genecards.org/cgi-bin/carddisp.pl?gene=CYP4F2">https://www.genecards.org/cgi-bin/carddisp.pl?gene=CYP4F2</a>   |
| UBD     | Ubiquitin D                                                         | Protein Coding | 39 | GC06M029556 | 5.88 <a href="https://www.genecards.org/cgi-bin/carddisp.pl?gene=UBD">https://www.genecards.org/cgi-bin/carddisp.pl?gene=UBD</a>         |
| CASP2   | Caspase 2                                                           | Protein Coding | 49 | GC07P144979 | 5.87 <a href="https://www.genecards.org/cgi-bin/carddisp.pl?gene=CASP2">https://www.genecards.org/cgi-bin/carddisp.pl?gene=CASP2</a>     |
| MIR331  | MicroRNA 331                                                        | RNA Gene       | 18 | GC12P095308 | 5.86 <a href="https://www.genecards.org/cgi-bin/carddisp.pl?gene=MIR331">https://www.genecards.org/cgi-bin/carddisp.pl?gene=MIR331</a>   |
| SIK1    | Salt Inducible Kinase 1                                             | Protein Coding | 46 | GC21M043414 | 5.82 <a href="https://www.genecards.org/cgi-bin/carddisp.pl?gene=SIK1">https://www.genecards.org/cgi-bin/carddisp.pl?gene=SIK1</a>       |
| COX6A2  | Cytochrome C Oxidase Subunit 6A2                                    | Protein Coding | 38 | GC16M031439 | 5.81 <a href="https://www.genecards.org/cgi-bin/carddisp.pl?gene=COX6A2">https://www.genecards.org/cgi-bin/carddisp.pl?gene=COX6A2</a>   |
| FGL1    | Fibrinogen Like 1                                                   | Protein Coding | 40 | GC08M017864 | 5.78 <a href="https://www.genecards.org/cgi-bin/carddisp.pl?gene=FGL1">https://www.genecards.org/cgi-bin/carddisp.pl?gene=FGL1</a>       |
| ITPR2   | Inositol 1,4,5-Trisphosphate Receptor Type 2                        | Protein Coding | 45 | GC12M026336 | 5.76 <a href="https://www.genecards.org/cgi-bin/carddisp.pl?gene=ITPR2">https://www.genecards.org/cgi-bin/carddisp.pl?gene=ITPR2</a>     |
| UGT1A6  | UDP Glucuronosyltransferase Family 1 Member A6                      | Protein Coding | 40 | GC02P233691 | 5.73 <a href="https://www.genecards.org/cgi-bin/carddisp.pl?gene=UGT1A6">https://www.genecards.org/cgi-bin/carddisp.pl?gene=UGT1A6</a>   |
| HSPA1A  | Heat Shock Protein Family A (Hsp70) Member 1A                       | Protein Coding | 43 | GC06P047326 | 5.73 <a href="https://www.genecards.org/cgi-bin/carddisp.pl?gene=HSPA1A">https://www.genecards.org/cgi-bin/carddisp.pl?gene=HSPA1A</a>   |
| PTPRG   | Protein Tyrosine Phosphatase Receptor Type G                        | Protein Coding | 41 | GC03P061522 | 5.72 <a href="https://www.genecards.org/cgi-bin/carddisp.pl?gene=PTPRG">https://www.genecards.org/cgi-bin/carddisp.pl?gene=PTPRG</a>     |
| PRKAG1  | Protein Kinase AMP-Activated Non-Catalytic Subunit                  | Protein Coding | 48 | GC12M049002 | 5.71 <a href="https://www.genecards.org/cgi-bin/carddisp.pl?gene=PRKAG1">https://www.genecards.org/cgi-bin/carddisp.pl?gene=PRKAG1</a>   |
| LBP     | Lipopolysaccharide Binding Protein                                  | Protein Coding | 44 | GC20P038346 | 5.7 <a href="https://www.genecards.org/cgi-bin/carddisp.pl?gene=LBP">https://www.genecards.org/cgi-bin/carddisp.pl?gene=LBP</a>          |
| VTN     | Vitronectin                                                         | Protein Coding | 44 | GC17M029955 | 5.7 <a href="https://www.genecards.org/cgi-bin/carddisp.pl?gene=VTN">https://www.genecards.org/cgi-bin/carddisp.pl?gene=VTN</a>          |
| RDH5    | Retinol Dehydrogenase 5                                             | Protein Coding | 46 | GC12P055720 | 5.69 <a href="https://www.genecards.org/cgi-bin/carddisp.pl?gene=RDH5">https://www.genecards.org/cgi-bin/carddisp.pl?gene=RDH5</a>       |
| PIN1    | Peptidylprolyl Cis/Trans Isomerase, NIMA-Interacting                | Protein Coding | 47 | GC19P009835 | 5.68 <a href="https://www.genecards.org/cgi-bin/carddisp.pl?gene=PIN1">https://www.genecards.org/cgi-bin/carddisp.pl?gene=PIN1</a>       |
| P2RX7   | Purinergic Receptor P2X 7                                           | Protein Coding | 45 | GC12P122829 | 5.68 <a href="https://www.genecards.org/cgi-bin/carddisp.pl?gene=P2RX7">https://www.genecards.org/cgi-bin/carddisp.pl?gene=P2RX7</a>     |
| XRCC5   | X-Ray Repair Cross Complementing 5                                  | Protein Coding | 44 | GC02P216107 | 5.68 <a href="https://www.genecards.org/cgi-bin/carddisp.pl?gene=XRCC5">https://www.genecards.org/cgi-bin/carddisp.pl?gene=XRCC5</a>     |
| TRIM21  | Tripartite Motif Containing 21                                      | Protein Coding | 42 | GC11M004384 | 5.67 <a href="https://www.genecards.org/cgi-bin/carddisp.pl?gene=TRIM21">https://www.genecards.org/cgi-bin/carddisp.pl?gene=TRIM21</a>   |
| CXCL11  | C-X-C Motif Chemokine Ligand 11                                     | Protein Coding | 40 | GC04M076033 | 5.66 <a href="https://www.genecards.org/cgi-bin/carddisp.pl?gene=CXCL11">https://www.genecards.org/cgi-bin/carddisp.pl?gene=CXCL11</a>   |
| CCL19   | C-C Motif Chemokine Ligand 19                                       | Protein Coding | 41 | GC09M034692 | 5.64 <a href="https://www.genecards.org/cgi-bin/carddisp.pl?gene=CCL19">https://www.genecards.org/cgi-bin/carddisp.pl?gene=CCL19</a>     |

|          |                                                    |                |    |             |      |                                                                                                                                       |
|----------|----------------------------------------------------|----------------|----|-------------|------|---------------------------------------------------------------------------------------------------------------------------------------|
| MIR24-1  | MicroRNA 24-1                                      | RNA Gene       | 18 | GC09P095086 | 5.63 | <a href="https://www.genecards.org/cgi-bin/carddisp.pl?gene=MIR24-1">https://www.genecards.org/cgi-bin/carddisp.pl?gene=MIR24-1</a>   |
| PRKAB2   | Protein Kinase AMP-Activated Non-Catalytic Subunit | Protein Coding | 46 | GC01M147155 | 5.59 | <a href="https://www.genecards.org/cgi-bin/carddisp.pl?gene=PRKAB2">https://www.genecards.org/cgi-bin/carddisp.pl?gene=PRKAB2</a>     |
| UGT1A9   | UDP Glucuronosyltransferase Family 1 Member A9     | Protein Coding | 43 | GC02P233671 | 5.58 | <a href="https://www.genecards.org/cgi-bin/carddisp.pl?gene=UGT1A9">https://www.genecards.org/cgi-bin/carddisp.pl?gene=UGT1A9</a>     |
| DMGDH    | Dimethylglycine Dehydrogenase                      | Protein Coding | 42 | GC05M078997 | 5.57 | <a href="https://www.genecards.org/cgi-bin/carddisp.pl?gene=DMGDH">https://www.genecards.org/cgi-bin/carddisp.pl?gene=DMGDH</a>       |
| UGT1A7   | UDP Glucuronosyltransferase Family 1 Member A7     | Protein Coding | 39 | GC02P233681 | 5.56 | <a href="https://www.genecards.org/cgi-bin/carddisp.pl?gene=UGT1A7">https://www.genecards.org/cgi-bin/carddisp.pl?gene=UGT1A7</a>     |
| GPNMB    | Glycoprotein Nmb                                   | Protein Coding | 44 | GC07P023238 | 5.56 | <a href="https://www.genecards.org/cgi-bin/carddisp.pl?gene=GPNMB">https://www.genecards.org/cgi-bin/carddisp.pl?gene=GPNMB</a>       |
| CCR2     | C-C Motif Chemokine Receptor 2                     | Protein Coding | 45 | GC03P046356 | 5.53 | <a href="https://www.genecards.org/cgi-bin/carddisp.pl?gene=CCR2">https://www.genecards.org/cgi-bin/carddisp.pl?gene=CCR2</a>         |
| SNTA1    | Syntrophin Alpha 1                                 | Protein Coding | 43 | GC20M033407 | 5.53 | <a href="https://www.genecards.org/cgi-bin/carddisp.pl?gene=SNTA1">https://www.genecards.org/cgi-bin/carddisp.pl?gene=SNTA1</a>       |
| JAZF1    | JAZF Zinc Finger 1                                 | Protein Coding | 39 | GC07M027830 | 5.5  | <a href="https://www.genecards.org/cgi-bin/carddisp.pl?gene=JAZF1">https://www.genecards.org/cgi-bin/carddisp.pl?gene=JAZF1</a>       |
| H4-16    | H4 Histone 16                                      | Protein Coding | 33 | GC12M014768 | 5.5  | <a href="https://www.genecards.org/cgi-bin/carddisp.pl?gene=H4-16">https://www.genecards.org/cgi-bin/carddisp.pl?gene=H4-16</a>       |
| CYP4F3   | Cytochrome P450 Family 4 Subfamily F Member 3      | Protein Coding | 42 | GC19P015640 | 5.49 | <a href="https://www.genecards.org/cgi-bin/carddisp.pl?gene=CYP4F3">https://www.genecards.org/cgi-bin/carddisp.pl?gene=CYP4F3</a>     |
| CD82     | CD82 Molecule                                      | Protein Coding | 43 | GC11P044586 | 5.48 | <a href="https://www.genecards.org/cgi-bin/carddisp.pl?gene=CD82">https://www.genecards.org/cgi-bin/carddisp.pl?gene=CD82</a>         |
| CUL3     | Cullin 3                                           | Protein Coding | 46 | GC02M224470 | 5.47 | <a href="https://www.genecards.org/cgi-bin/carddisp.pl?gene=CUL3">https://www.genecards.org/cgi-bin/carddisp.pl?gene=CUL3</a>         |
| ACSL3    | Acyl-CoA Synthetase Long Chain Family Member 3     | Protein Coding | 40 | GC02P222860 | 5.46 | <a href="https://www.genecards.org/cgi-bin/carddisp.pl?gene=ACSL3">https://www.genecards.org/cgi-bin/carddisp.pl?gene=ACSL3</a>       |
| TNFRSF4  | TNF Receptor Superfamily Member 4                  | Protein Coding | 43 | GC01M001211 | 5.39 | <a href="https://www.genecards.org/cgi-bin/carddisp.pl?gene=TNFRSF4">https://www.genecards.org/cgi-bin/carddisp.pl?gene=TNFRSF4</a>   |
| CDH4     | Cadherin 4                                         | Protein Coding | 41 | GC20P061252 | 5.38 | <a href="https://www.genecards.org/cgi-bin/carddisp.pl?gene=CDH4">https://www.genecards.org/cgi-bin/carddisp.pl?gene=CDH4</a>         |
| LECT2    | Leukocyte Cell Derived Chemotaxin 2                | Protein Coding | 36 | GC05M135922 | 5.37 | <a href="https://www.genecards.org/cgi-bin/carddisp.pl?gene=LECT2">https://www.genecards.org/cgi-bin/carddisp.pl?gene=LECT2</a>       |
| MIR30C1  | MicroRNA 30c-1                                     | RNA Gene       | 21 | GC01P040757 | 5.35 | <a href="https://www.genecards.org/cgi-bin/carddisp.pl?gene=MIR30C1">https://www.genecards.org/cgi-bin/carddisp.pl?gene=MIR30C1</a>   |
| UGT1A8   | UDP Glucuronosyltransferase Family 1 Member A8     | Protein Coding | 35 | GC02P233618 | 5.34 | <a href="https://www.genecards.org/cgi-bin/carddisp.pl?gene=UGT1A8">https://www.genecards.org/cgi-bin/carddisp.pl?gene=UGT1A8</a>     |
| PRPF8    | Pre-mRNA Processing Factor 8                       | Protein Coding | 41 | GC17M001650 | 5.33 | <a href="https://www.genecards.org/cgi-bin/carddisp.pl?gene=PRPF8">https://www.genecards.org/cgi-bin/carddisp.pl?gene=PRPF8</a>       |
| MLX      | MAX Dimerization Protein MLX                       | Protein Coding | 43 | GC17P042567 | 5.29 | <a href="https://www.genecards.org/cgi-bin/carddisp.pl?gene=MLX">https://www.genecards.org/cgi-bin/carddisp.pl?gene=MLX</a>           |
| ZNF365   | Zinc Finger Protein 365                            | Protein Coding | 37 | GC10P062374 | 5.29 | <a href="https://www.genecards.org/cgi-bin/carddisp.pl?gene=ZNF365">https://www.genecards.org/cgi-bin/carddisp.pl?gene=ZNF365</a>     |
| FNDC5    | Fibronectin Type III Domain Containing 5           | Protein Coding | 34 | GC01M032864 | 5.29 | <a href="https://www.genecards.org/cgi-bin/carddisp.pl?gene=FNDC5">https://www.genecards.org/cgi-bin/carddisp.pl?gene=FNDC5</a>       |
| NDUFA5   | NADH:Ubiquinone Oxidoreductase Subunit A5          | Protein Coding | 41 | GC07M123536 | 5.29 | <a href="https://www.genecards.org/cgi-bin/carddisp.pl?gene=NDUFA5">https://www.genecards.org/cgi-bin/carddisp.pl?gene=NDUFA5</a>     |
| FYN      | FYN Proto-Oncogene, Src Family Tyrosine Kinase     | Protein Coding | 48 | GC06M111660 | 5.26 | <a href="https://www.genecards.org/cgi-bin/carddisp.pl?gene=FYN">https://www.genecards.org/cgi-bin/carddisp.pl?gene=FYN</a>           |
| CYLD     | CYLD Lysine 63 Deubiquitinase                      | Protein Coding | 48 | GC16P050742 | 5.23 | <a href="https://www.genecards.org/cgi-bin/carddisp.pl?gene=CYLD">https://www.genecards.org/cgi-bin/carddisp.pl?gene=CYLD</a>         |
| HYOU1    | Hypoxia Up-Regulated 1                             | Protein Coding | 43 | GC11M119045 | 5.21 | <a href="https://www.genecards.org/cgi-bin/carddisp.pl?gene=HYOU1">https://www.genecards.org/cgi-bin/carddisp.pl?gene=HYOU1</a>       |
| EEA1     | Early Endosome Antigen 1                           | Protein Coding | 43 | GC12M092770 | 5.2  | <a href="https://www.genecards.org/cgi-bin/carddisp.pl?gene=EEA1">https://www.genecards.org/cgi-bin/carddisp.pl?gene=EEA1</a>         |
| NOX4     | NADPH Oxidase 4                                    | Protein Coding | 42 | GC11M089324 | 5.19 | <a href="https://www.genecards.org/cgi-bin/carddisp.pl?gene=NOX4">https://www.genecards.org/cgi-bin/carddisp.pl?gene=NOX4</a>         |
| FOXA1    | Forkhead Box A1                                    | Protein Coding | 43 | GC14M037589 | 5.17 | <a href="https://www.genecards.org/cgi-bin/carddisp.pl?gene=FOXA1">https://www.genecards.org/cgi-bin/carddisp.pl?gene=FOXA1</a>       |
| NDUFS5   | NADH:Ubiquinone Oxidoreductase Subunit S5          | Protein Coding | 40 | GC01P039026 | 5.17 | <a href="https://www.genecards.org/cgi-bin/carddisp.pl?gene=NDUFS5">https://www.genecards.org/cgi-bin/carddisp.pl?gene=NDUFS5</a>     |
| SERPINF1 | Serpin Family F Member 1                           | Protein Coding | 44 | GC17P001761 | 5.16 | <a href="https://www.genecards.org/cgi-bin/carddisp.pl?gene=SERPINF1">https://www.genecards.org/cgi-bin/carddisp.pl?gene=SERPINF1</a> |
| PRDX1    | Peroxiredoxin 1                                    | Protein Coding | 49 | GC01M045511 | 5.16 | <a href="https://www.genecards.org/cgi-bin/carddisp.pl?gene=PRDX1">https://www.genecards.org/cgi-bin/carddisp.pl?gene=PRDX1</a>       |
| EFTUD2   | Elongation Factor Tu GTP Binding Domain Containing | Protein Coding | 42 | GC17M044852 | 5.16 | <a href="https://www.genecards.org/cgi-bin/carddisp.pl?gene=EFTUD2">https://www.genecards.org/cgi-bin/carddisp.pl?gene=EFTUD2</a>     |
| YEATS2   | YEATS Domain Containing 2                          | Protein Coding | 36 | GC03P183698 | 5.15 | <a href="https://www.genecards.org/cgi-bin/carddisp.pl?gene=YEATS2">https://www.genecards.org/cgi-bin/carddisp.pl?gene=YEATS2</a>     |
| LPCAT3   | Lysophosphatidylcholine Acyltransferase 3          | Protein Coding | 36 | GC12M006976 | 5.12 | <a href="https://www.genecards.org/cgi-bin/carddisp.pl?gene=LPCAT3">https://www.genecards.org/cgi-bin/carddisp.pl?gene=LPCAT3</a>     |
| COX7A2   | Cytochrome C Oxidase Subunit 7A2                   | Protein Coding | 38 | GC06M075237 | 5.12 | <a href="https://www.genecards.org/cgi-bin/carddisp.pl?gene=COX7A2">https://www.genecards.org/cgi-bin/carddisp.pl?gene=COX7A2</a>     |
| CCT5     | Chaperonin Containing TCP1 Subunit 5               | Protein Coding | 43 | GC05P010236 | 5.1  | <a href="https://www.genecards.org/cgi-bin/carddisp.pl?gene=CCT5">https://www.genecards.org/cgi-bin/carddisp.pl?gene=CCT5</a>         |
| CLDN2    | Claudin 2                                          | Protein Coding | 41 | GC0XP106900 | 5.09 | <a href="https://www.genecards.org/cgi-bin/carddisp.pl?gene=CLDN2">https://www.genecards.org/cgi-bin/carddisp.pl?gene=CLDN2</a>       |

|           |                                                    |                |    |             |      |                                                                                                                                         |
|-----------|----------------------------------------------------|----------------|----|-------------|------|-----------------------------------------------------------------------------------------------------------------------------------------|
| AFAP1-AS1 | AFAP1 Antisense RNA 1                              | RNA Gene       | 17 | GC04P007756 | 5.09 | <a href="https://www.genecards.org/cgi-bin/carddisp.pl?gene=AFAP1-AS1">https://www.genecards.org/cgi-bin/carddisp.pl?gene=AFAP1-AS1</a> |
| NNMT      | Nicotinamide N-Methyltransferase                   | Protein Coding | 45 | GC11P114257 | 5.09 | <a href="https://www.genecards.org/cgi-bin/carddisp.pl?gene=NNMT">https://www.genecards.org/cgi-bin/carddisp.pl?gene=NNMT</a>           |
| YWHAЕ     | Tyrosine 3-Monooxygenase/Tryptophan 5-Monooxyge    | Protein Coding | 50 | GC17M001346 | 5.08 | <a href="https://www.genecards.org/cgi-bin/carddisp.pl?gene=YWHAЕ">https://www.genecards.org/cgi-bin/carddisp.pl?gene=YWHAЕ</a>         |
| COX6C     | Cytochrome C Oxidase Subunit 6C                    | Protein Coding | 39 | GC08M099899 | 5.03 | <a href="https://www.genecards.org/cgi-bin/carddisp.pl?gene=COX6C">https://www.genecards.org/cgi-bin/carddisp.pl?gene=COX6C</a>         |
| COPA      | COPI Coat Complex Subunit Alpha                    | Protein Coding | 41 | GC01M160288 | 5.01 | <a href="https://www.genecards.org/cgi-bin/carddisp.pl?gene=COPA">https://www.genecards.org/cgi-bin/carddisp.pl?gene=COPA</a>           |
| TRAPPC9   | Trafficking Protein Particle Complex 9             | Protein Coding | 39 | GC08M139728 | 5.01 | <a href="https://www.genecards.org/cgi-bin/carddisp.pl?gene=TRAPPC9">https://www.genecards.org/cgi-bin/carddisp.pl?gene=TRAPPC9</a>     |
| COMMD1    | Copper Metabolism Domain Containing 1              | Protein Coding | 42 | GC02P061888 | 5    | <a href="https://www.genecards.org/cgi-bin/carddisp.pl?gene=COMMD1">https://www.genecards.org/cgi-bin/carddisp.pl?gene=COMMD1</a>       |
| NDUFA8    | NADH:Ubiquinone Oxidoreductase Subunit A8          | Protein Coding | 41 | GC09M122132 | 4.99 | <a href="https://www.genecards.org/cgi-bin/carddisp.pl?gene=NDUFA8">https://www.genecards.org/cgi-bin/carddisp.pl?gene=NDUFA8</a>       |
| HNRNPK    | Heterogeneous Nuclear Ribonucleoprotein K          | Protein Coding | 45 | GC09M084056 | 4.98 | <a href="https://www.genecards.org/cgi-bin/carddisp.pl?gene=HNRNPK">https://www.genecards.org/cgi-bin/carddisp.pl?gene=HNRNPK</a>       |
| SERPINA12 | Serpin Family A Member 12                          | Protein Coding | 38 | GC14M094526 | 4.96 | <a href="https://www.genecards.org/cgi-bin/carddisp.pl?gene=SERPINA12">https://www.genecards.org/cgi-bin/carddisp.pl?gene=SERPINA12</a> |
| GOT1      | Glutamic-Oxaloacetic Transaminase 1                | Protein Coding | 47 | GC10M099396 | 4.96 | <a href="https://www.genecards.org/cgi-bin/carddisp.pl?gene=GOT1">https://www.genecards.org/cgi-bin/carddisp.pl?gene=GOT1</a>           |
| DISC1     | DISC1 Scaffold Protein                             | Protein Coding | 43 | GC01P231626 | 4.95 | <a href="https://www.genecards.org/cgi-bin/carddisp.pl?gene=DISC1">https://www.genecards.org/cgi-bin/carddisp.pl?gene=DISC1</a>         |
| NAT1      | N-Acetyltransferase 1                              | Protein Coding | 44 | GC08P018179 | 4.94 | <a href="https://www.genecards.org/cgi-bin/carddisp.pl?gene=NAT1">https://www.genecards.org/cgi-bin/carddisp.pl?gene=NAT1</a>           |
| TRAF1     | TNF Receptor Associated Factor 1                   | Protein Coding | 43 | GC09M120902 | 4.93 | <a href="https://www.genecards.org/cgi-bin/carddisp.pl?gene=TRAF1">https://www.genecards.org/cgi-bin/carddisp.pl?gene=TRAF1</a>         |
| XRCC6     | X-Ray Repair Cross Complementing 6                 | Protein Coding | 45 | GC22P041622 | 4.91 | <a href="https://www.genecards.org/cgi-bin/carddisp.pl?gene=XRCC6">https://www.genecards.org/cgi-bin/carddisp.pl?gene=XRCC6</a>         |
| PPP2CA    | Protein Phosphatase 2 Catalytic Subunit Alpha      | Protein Coding | 48 | GC05M134194 | 4.89 | <a href="https://www.genecards.org/cgi-bin/carddisp.pl?gene=PPP2CA">https://www.genecards.org/cgi-bin/carddisp.pl?gene=PPP2CA</a>       |
| CES2      | Carboxylesterase 2                                 | Protein Coding | 43 | GC16P066934 | 4.88 | <a href="https://www.genecards.org/cgi-bin/carddisp.pl?gene=CES2">https://www.genecards.org/cgi-bin/carddisp.pl?gene=CES2</a>           |
| NDUFC2    | NADH:Ubiquinone Oxidoreductase Subunit C2          | Protein Coding | 39 | GC11M078068 | 4.87 | <a href="https://www.genecards.org/cgi-bin/carddisp.pl?gene=NDUFC2">https://www.genecards.org/cgi-bin/carddisp.pl?gene=NDUFC2</a>       |
| NDUFB6    | NADH:Ubiquinone Oxidoreductase Subunit B6          | Protein Coding | 40 | GC09M032553 | 4.87 | <a href="https://www.genecards.org/cgi-bin/carddisp.pl?gene=NDUFB6">https://www.genecards.org/cgi-bin/carddisp.pl?gene=NDUFB6</a>       |
| UQCR11    | Ubiquinol-Cytochrome C Reductase, Complex III Subu | Protein Coding | 37 | GC19M001597 | 4.86 | <a href="https://www.genecards.org/cgi-bin/carddisp.pl?gene=UQCR11">https://www.genecards.org/cgi-bin/carddisp.pl?gene=UQCR11</a>       |
| CYP2J2    | Cytochrome P450 Family 2 Subfamily J Member 2      | Protein Coding | 44 | GC01M059893 | 4.83 | <a href="https://www.genecards.org/cgi-bin/carddisp.pl?gene=CYP2J2">https://www.genecards.org/cgi-bin/carddisp.pl?gene=CYP2J2</a>       |
| UQCRC1    | Ubiquinol-Cytochrome C Reductase Core Protein 1    | Protein Coding | 42 | GC03M048598 | 4.83 | <a href="https://www.genecards.org/cgi-bin/carddisp.pl?gene=UQCRC1">https://www.genecards.org/cgi-bin/carddisp.pl?gene=UQCRC1</a>       |
| TNC       | Tenascin C                                         | Protein Coding | 48 | GC09M115019 | 4.82 | <a href="https://www.genecards.org/cgi-bin/carddisp.pl?gene=TNC">https://www.genecards.org/cgi-bin/carddisp.pl?gene=TNC</a>             |
| CARS1     | Cysteinyl-TRNA Synthetase 1                        | Protein Coding | 32 | GC11M003000 | 4.82 | <a href="https://www.genecards.org/cgi-bin/carddisp.pl?gene=CARS1">https://www.genecards.org/cgi-bin/carddisp.pl?gene=CARS1</a>         |
| TRAP1     | TNF Receptor Associated Protein 1                  | Protein Coding | 43 | GC16M003652 | 4.78 | <a href="https://www.genecards.org/cgi-bin/carddisp.pl?gene=TRAP1">https://www.genecards.org/cgi-bin/carddisp.pl?gene=TRAP1</a>         |
| RTN4      | Reticulon 4                                        | Protein Coding | 44 | GC02M054934 | 4.78 | <a href="https://www.genecards.org/cgi-bin/carddisp.pl?gene=RTN4">https://www.genecards.org/cgi-bin/carddisp.pl?gene=RTN4</a>           |
| PRSS2     | Serine Protease 2                                  | Protein Coding | 39 | GC07P144959 | 4.77 | <a href="https://www.genecards.org/cgi-bin/carddisp.pl?gene=PRSS2">https://www.genecards.org/cgi-bin/carddisp.pl?gene=PRSS2</a>         |
| UGT1A4    | UDP Glucuronosyltransferase Family 1 Member A4     | Protein Coding | 41 | GC02P233718 | 4.75 | <a href="https://www.genecards.org/cgi-bin/carddisp.pl?gene=UGT1A4">https://www.genecards.org/cgi-bin/carddisp.pl?gene=UGT1A4</a>       |
| PDK4      | Pyruvate Dehydrogenase Kinase 4                    | Protein Coding | 45 | GC07M095583 | 4.74 | <a href="https://www.genecards.org/cgi-bin/carddisp.pl?gene=PDK4">https://www.genecards.org/cgi-bin/carddisp.pl?gene=PDK4</a>           |
| YY1       | YY1 Transcription Factor                           | Protein Coding | 48 | GC14P100238 | 4.72 | <a href="https://www.genecards.org/cgi-bin/carddisp.pl?gene=YY1">https://www.genecards.org/cgi-bin/carddisp.pl?gene=YY1</a>             |
| JCAD      | Junctional Cadherin 5 Associated                   | Protein Coding | 26 | GC10M030012 | 4.72 | <a href="https://www.genecards.org/cgi-bin/carddisp.pl?gene=JCAD">https://www.genecards.org/cgi-bin/carddisp.pl?gene=JCAD</a>           |
| SIRT6     | Sirtuin 6                                          | Protein Coding | 45 | GC19M004174 | 4.71 | <a href="https://www.genecards.org/cgi-bin/carddisp.pl?gene=SIRT6">https://www.genecards.org/cgi-bin/carddisp.pl?gene=SIRT6</a>         |
| PLIN5     | Perilipin 5                                        | Protein Coding | 33 | GC19M004522 | 4.7  | <a href="https://www.genecards.org/cgi-bin/carddisp.pl?gene=PLIN5">https://www.genecards.org/cgi-bin/carddisp.pl?gene=PLIN5</a>         |
| SNRNP200  | Small Nuclear Ribonucleoprotein U5 Subunit 200     | Protein Coding | 41 | GC02M096275 | 4.67 | <a href="https://www.genecards.org/cgi-bin/carddisp.pl?gene=SNRNP200">https://www.genecards.org/cgi-bin/carddisp.pl?gene=SNRNP200</a>   |
| MGAM      | Maltase-Glucoamylase                               | Protein Coding | 41 | GC07P145052 | 4.65 | <a href="https://www.genecards.org/cgi-bin/carddisp.pl?gene=MGAM">https://www.genecards.org/cgi-bin/carddisp.pl?gene=MGAM</a>           |
| CDH5      | Cadherin 5                                         | Protein Coding | 47 | GC16P066366 | 4.63 | <a href="https://www.genecards.org/cgi-bin/carddisp.pl?gene=CDH5">https://www.genecards.org/cgi-bin/carddisp.pl?gene=CDH5</a>           |
| YBX1      | Y-Box Binding Protein 1                            | Protein Coding | 39 | GC01P042682 | 4.63 | <a href="https://www.genecards.org/cgi-bin/carddisp.pl?gene=YBX1">https://www.genecards.org/cgi-bin/carddisp.pl?gene=YBX1</a>           |
| TP53BP1   | Tumor Protein P53 Binding Protein 1                | Protein Coding | 44 | GC15M043403 | 4.62 | <a href="https://www.genecards.org/cgi-bin/carddisp.pl?gene=TP53BP1">https://www.genecards.org/cgi-bin/carddisp.pl?gene=TP53BP1</a>     |
| NCOA3     | Nuclear Receptor Coactivator 3                     | Protein Coding | 45 | GC20P047501 | 4.61 | <a href="https://www.genecards.org/cgi-bin/carddisp.pl?gene=NCOA3">https://www.genecards.org/cgi-bin/carddisp.pl?gene=NCOA3</a>         |

|          |                                                      |                |    |             |                                                                                                                                            |
|----------|------------------------------------------------------|----------------|----|-------------|--------------------------------------------------------------------------------------------------------------------------------------------|
| RPL10    | Ribosomal Protein L10                                | Protein Coding | 45 | GC0XP154389 | 4.6 <a href="https://www.genecards.org/cgi-bin/carddisp.pl?gene=RPL10">https://www.genecards.org/cgi-bin/carddisp.pl?gene=RPL10</a>        |
| UGT1A3   | UDP Glucuronosyltransferase Family 1 Member A3       | Protein Coding | 38 | GC02P233729 | 4.59 <a href="https://www.genecards.org/cgi-bin/carddisp.pl?gene=UGT1A3">https://www.genecards.org/cgi-bin/carddisp.pl?gene=UGT1A3</a>     |
| STUB1    | STIP1 Homology And U-Box Containing Protein 1        | Protein Coding | 45 | GC16P001405 | 4.57 <a href="https://www.genecards.org/cgi-bin/carddisp.pl?gene=STUB1">https://www.genecards.org/cgi-bin/carddisp.pl?gene=STUB1</a>       |
| SOD3     | Superoxide Dismutase 3                               | Protein Coding | 40 | GC04P024798 | 4.56 <a href="https://www.genecards.org/cgi-bin/carddisp.pl?gene=SOD3">https://www.genecards.org/cgi-bin/carddisp.pl?gene=SOD3</a>         |
| UBE2D2   | Ubiquitin Conjugating Enzyme E2 D2                   | Protein Coding | 44 | GC05P139526 | 4.55 <a href="https://www.genecards.org/cgi-bin/carddisp.pl?gene=UBE2D2">https://www.genecards.org/cgi-bin/carddisp.pl?gene=UBE2D2</a>     |
| ROCK1    | Rho Associated Coiled-Coil Containing Protein Kinase | Protein Coding | 50 | GC18M020946 | 4.55 <a href="https://www.genecards.org/cgi-bin/carddisp.pl?gene=ROCK1">https://www.genecards.org/cgi-bin/carddisp.pl?gene=ROCK1</a>       |
| CACNA2D1 | Calcium Voltage-Gated Channel Auxiliary Subunit A1   | Protein Coding | 45 | GC07M081946 | 4.55 <a href="https://www.genecards.org/cgi-bin/carddisp.pl?gene=CACNA2D1">https://www.genecards.org/cgi-bin/carddisp.pl?gene=CACNA2D1</a> |
| SLC34A2  | Solute Carrier Family 34 Member 2                    | Protein Coding | 45 | GC04P025657 | 4.54 <a href="https://www.genecards.org/cgi-bin/carddisp.pl?gene=SLC34A2">https://www.genecards.org/cgi-bin/carddisp.pl?gene=SLC34A2</a>   |
| AKR1B10  | Aldo-Keto Reductase Family 1 Member B10              | Protein Coding | 43 | GC07P134527 | 4.53 <a href="https://www.genecards.org/cgi-bin/carddisp.pl?gene=AKR1B10">https://www.genecards.org/cgi-bin/carddisp.pl?gene=AKR1B10</a>   |
| H4C11    | H4 Clustered Histone 11                              | Protein Coding | 30 | GC06P028800 | 4.52 <a href="https://www.genecards.org/cgi-bin/carddisp.pl?gene=H4C11">https://www.genecards.org/cgi-bin/carddisp.pl?gene=H4C11</a>       |
| LGALS3BP | Galectin 3 Binding Protein                           | Protein Coding | 41 | GC17M078971 | 4.52 <a href="https://www.genecards.org/cgi-bin/carddisp.pl?gene=LGALS3BP">https://www.genecards.org/cgi-bin/carddisp.pl?gene=LGALS3BP</a> |
| H4C1     | H4 Clustered Histone 1                               | Protein Coding | 31 | GC06P026041 | 4.51 <a href="https://www.genecards.org/cgi-bin/carddisp.pl?gene=H4C1">https://www.genecards.org/cgi-bin/carddisp.pl?gene=H4C1</a>         |
| SERPINH1 | Serpin Family H Member 1                             | Protein Coding | 45 | GC11P075562 | 4.51 <a href="https://www.genecards.org/cgi-bin/carddisp.pl?gene=SERPINH1">https://www.genecards.org/cgi-bin/carddisp.pl?gene=SERPINH1</a> |
| SLC25A11 | Solute Carrier Family 25 Member 11                   | Protein Coding | 43 | GC17M004937 | 4.48 <a href="https://www.genecards.org/cgi-bin/carddisp.pl?gene=SLC25A11">https://www.genecards.org/cgi-bin/carddisp.pl?gene=SLC25A11</a> |
| IFNL4    | Interferon Lambda 4 (Gene/Pseudogene)                | Protein Coding | 19 | GC19M039246 | 4.46 <a href="https://www.genecards.org/cgi-bin/carddisp.pl?gene=IFNL4">https://www.genecards.org/cgi-bin/carddisp.pl?gene=IFNL4</a>       |
| IL36A    | Interleukin 36 Alpha                                 | Protein Coding | 37 | GC02P113005 | 4.46 <a href="https://www.genecards.org/cgi-bin/carddisp.pl?gene=IL36A">https://www.genecards.org/cgi-bin/carddisp.pl?gene=IL36A</a>       |
| ACE2     | Angiotensin I Converting Enzyme 2                    | Protein Coding | 48 | GC0XM015562 | 4.45 <a href="https://www.genecards.org/cgi-bin/carddisp.pl?gene=ACE2">https://www.genecards.org/cgi-bin/carddisp.pl?gene=ACE2</a>         |
| TXNRD1   | Thioredoxin Reductase 1                              | Protein Coding | 47 | GC12P104215 | 4.43 <a href="https://www.genecards.org/cgi-bin/carddisp.pl?gene=TXNRD1">https://www.genecards.org/cgi-bin/carddisp.pl?gene=TXNRD1</a>     |
| HPS1     | HPS1 Biogenesis Of Lysosomal Organelles Complex 3    | Protein Coding | 41 | GC10M098416 | 4.43 <a href="https://www.genecards.org/cgi-bin/carddisp.pl?gene=HPS1">https://www.genecards.org/cgi-bin/carddisp.pl?gene=HPS1</a>         |
| KHDRBS3  | KH RNA Binding Domain Containing, Signal Transdu     | Protein Coding | 37 | GC08P135457 | 4.42 <a href="https://www.genecards.org/cgi-bin/carddisp.pl?gene=KHDRBS3">https://www.genecards.org/cgi-bin/carddisp.pl?gene=KHDRBS3</a>   |
| CFD      | Complement Factor D                                  | Protein Coding | 44 | GC19P000859 | 4.42 <a href="https://www.genecards.org/cgi-bin/carddisp.pl?gene=CFD">https://www.genecards.org/cgi-bin/carddisp.pl?gene=CFD</a>           |
| ITLN1    | Intelectin 1                                         | Protein Coding | 39 | GC01M160876 | 4.4 <a href="https://www.genecards.org/cgi-bin/carddisp.pl?gene=ITLN1">https://www.genecards.org/cgi-bin/carddisp.pl?gene=ITLN1</a>        |
| AMPH     | Amphiphysin                                          | Protein Coding | 44 | GC07M038666 | 4.4 <a href="https://www.genecards.org/cgi-bin/carddisp.pl?gene=AMPH">https://www.genecards.org/cgi-bin/carddisp.pl?gene=AMPH</a>          |
| AZGP1    | Alpha-2-Glycoprotein 1, Zinc-Binding                 | Protein Coding | 43 | GC07M099967 | 4.38 <a href="https://www.genecards.org/cgi-bin/carddisp.pl?gene=AZGP1">https://www.genecards.org/cgi-bin/carddisp.pl?gene=AZGP1</a>       |
| POMP     | Proteasome Maturation Protein                        | Protein Coding | 41 | GC13P028659 | 4.35 <a href="https://www.genecards.org/cgi-bin/carddisp.pl?gene=POMP">https://www.genecards.org/cgi-bin/carddisp.pl?gene=POMP</a>         |
| SLC38A8  | Solute Carrier Family 38 Member 8                    | Protein Coding | 36 | GC16M084009 | 4.33 <a href="https://www.genecards.org/cgi-bin/carddisp.pl?gene=SLC38A8">https://www.genecards.org/cgi-bin/carddisp.pl?gene=SLC38A8</a>   |
| MMP11    | Matrix Metallopeptidase 11                           | Protein Coding | 45 | GC22P023768 | 4.32 <a href="https://www.genecards.org/cgi-bin/carddisp.pl?gene=MMP11">https://www.genecards.org/cgi-bin/carddisp.pl?gene=MMP11</a>       |
| H4C8     | H4 Clustered Histone 8                               | Protein Coding | 31 | GC06M027323 | 4.31 <a href="https://www.genecards.org/cgi-bin/carddisp.pl?gene=H4C8">https://www.genecards.org/cgi-bin/carddisp.pl?gene=H4C8</a>         |
| PEG10    | Paternally Expressed 10                              | Protein Coding | 40 | GC07P094656 | 4.31 <a href="https://www.genecards.org/cgi-bin/carddisp.pl?gene=PEG10">https://www.genecards.org/cgi-bin/carddisp.pl?gene=PEG10</a>       |
| H4C13    | H4 Clustered Histone 13                              | Protein Coding | 29 | GC06M028372 | 4.3 <a href="https://www.genecards.org/cgi-bin/carddisp.pl?gene=H4C13">https://www.genecards.org/cgi-bin/carddisp.pl?gene=H4C13</a>        |
| H4C9     | H4 Clustered Histone 9                               | Protein Coding | 31 | GC06P028910 | 4.29 <a href="https://www.genecards.org/cgi-bin/carddisp.pl?gene=H4C9">https://www.genecards.org/cgi-bin/carddisp.pl?gene=H4C9</a>         |
| NDUFA3   | NADH:Ubiquinone Oxidoreductase Subunit A3            | Protein Coding | 39 | GC19P054102 | 4.29 <a href="https://www.genecards.org/cgi-bin/carddisp.pl?gene=NDUFA3">https://www.genecards.org/cgi-bin/carddisp.pl?gene=NDUFA3</a>     |
| PRKCE    | Protein Kinase C Epsilon                             | Protein Coding | 50 | GC02P045651 | 4.28 <a href="https://www.genecards.org/cgi-bin/carddisp.pl?gene=PRKCE">https://www.genecards.org/cgi-bin/carddisp.pl?gene=PRKCE</a>       |
| COX8C    | Cytochrome C Oxidase Subunit 8C                      | Protein Coding | 32 | GC14P093348 | 4.27 <a href="https://www.genecards.org/cgi-bin/carddisp.pl?gene=COX8C">https://www.genecards.org/cgi-bin/carddisp.pl?gene=COX8C</a>       |
| H4C15    | H4 Clustered Histone 15                              | Protein Coding | 27 | GC01M149964 | 4.27 <a href="https://www.genecards.org/cgi-bin/carddisp.pl?gene=H4C15">https://www.genecards.org/cgi-bin/carddisp.pl?gene=H4C15</a>       |
| GSS      | Glutathione Synthetase                               | Protein Coding | 47 | GC20M034928 | 4.26 <a href="https://www.genecards.org/cgi-bin/carddisp.pl?gene=GSS">https://www.genecards.org/cgi-bin/carddisp.pl?gene=GSS</a>           |
| NDUFB7   | NADH:Ubiquinone Oxidoreductase Subunit B7            | Protein Coding | 39 | GC19M014566 | 4.25 <a href="https://www.genecards.org/cgi-bin/carddisp.pl?gene=NDUFB7">https://www.genecards.org/cgi-bin/carddisp.pl?gene=NDUFB7</a>     |
| LCN1     | Lipocalin 1                                          | Protein Coding | 39 | GC09P135521 | 4.24 <a href="https://www.genecards.org/cgi-bin/carddisp.pl?gene=LCN1">https://www.genecards.org/cgi-bin/carddisp.pl?gene=LCN1</a>         |
| H4C4     | H4 Clustered Histone 4                               | Protein Coding | 28 | GC06M027321 | 4.22 <a href="https://www.genecards.org/cgi-bin/carddisp.pl?gene=H4C4">https://www.genecards.org/cgi-bin/carddisp.pl?gene=H4C4</a>         |



|              |                                                       |                   |    |             |                                                                                                                                               |
|--------------|-------------------------------------------------------|-------------------|----|-------------|-----------------------------------------------------------------------------------------------------------------------------------------------|
| H4C14        | H4 Clustered Histone 14                               | Protein Coding    | 28 | GC01P149832 | 4.22 <a href="https://www.genecards.org/cgi-bin/carddisp.pl?gene=H4C14">https://www.genecards.org/cgi-bin/carddisp.pl?gene=H4C14</a>          |
| H4C12        | H4 Clustered Histone 12                               | Protein Coding    | 29 | GC06M028370 | 4.22 <a href="https://www.genecards.org/cgi-bin/carddisp.pl?gene=H4C12">https://www.genecards.org/cgi-bin/carddisp.pl?gene=H4C12</a>          |
| IL18RAP      | Interleukin 18 Receptor Accessory Protein             | Protein Coding    | 39 | GC02P102418 | 4.21 <a href="https://www.genecards.org/cgi-bin/carddisp.pl?gene=IL18RAP">https://www.genecards.org/cgi-bin/carddisp.pl?gene=IL18RAP</a>      |
| H4C3         | H4 Clustered Histone 3                                | Protein Coding    | 31 | GC06P028681 | 4.21 <a href="https://www.genecards.org/cgi-bin/carddisp.pl?gene=H4C3">https://www.genecards.org/cgi-bin/carddisp.pl?gene=H4C3</a>            |
| PRKAG3       | Protein Kinase AMP-Activated Non-Catalytic Subunit    | Protein Coding    | 43 | GC02M218823 | 4.2 <a href="https://www.genecards.org/cgi-bin/carddisp.pl?gene=PRKAG3">https://www.genecards.org/cgi-bin/carddisp.pl?gene=PRKAG3</a>         |
| DROSHA       | Drosha Ribonuclease III                               | Protein Coding    | 41 | GC05M031401 | 4.19 <a href="https://www.genecards.org/cgi-bin/carddisp.pl?gene=DROSHA">https://www.genecards.org/cgi-bin/carddisp.pl?gene=DROSHA</a>        |
| H4C6         | H4 Clustered Histone 6                                | Protein Coding    | 29 | GC06P028909 | 4.19 <a href="https://www.genecards.org/cgi-bin/carddisp.pl?gene=H4C6">https://www.genecards.org/cgi-bin/carddisp.pl?gene=H4C6</a>            |
| H4C2         | H4 Clustered Histone 2                                | Protein Coding    | 31 | GC06M026026 | 4.18 <a href="https://www.genecards.org/cgi-bin/carddisp.pl?gene=H4C2">https://www.genecards.org/cgi-bin/carddisp.pl?gene=H4C2</a>            |
| H4C5         | H4 Clustered Histone 5                                | Protein Coding    | 28 | GC06P028907 | 4.18 <a href="https://www.genecards.org/cgi-bin/carddisp.pl?gene=H4C5">https://www.genecards.org/cgi-bin/carddisp.pl?gene=H4C5</a>            |
| HS3ST1       | Heparan Sulfate-Glucosamine 3-Sulfotransferase 1      | Protein Coding    | 42 | GC04M011394 | 4.17 <a href="https://www.genecards.org/cgi-bin/carddisp.pl?gene=HS3ST1">https://www.genecards.org/cgi-bin/carddisp.pl?gene=HS3ST1</a>        |
| RPL6         | Ribosomal Protein L6                                  | Protein Coding    | 39 | GC12M112320 | 4.17 <a href="https://www.genecards.org/cgi-bin/carddisp.pl?gene=RPL6">https://www.genecards.org/cgi-bin/carddisp.pl?gene=RPL6</a>            |
| UGT1A10      | UDP Glucuronosyltransferase Family 1 Member A10       | Protein Coding    | 40 | GC02P233636 | 4.15 <a href="https://www.genecards.org/cgi-bin/carddisp.pl?gene=UGT1A10">https://www.genecards.org/cgi-bin/carddisp.pl?gene=UGT1A10</a>      |
| PCLO         | Piccolo Presynaptic Cytomatrix Protein                | Protein Coding    | 41 | GC07M082754 | 4.14 <a href="https://www.genecards.org/cgi-bin/carddisp.pl?gene=PCLO">https://www.genecards.org/cgi-bin/carddisp.pl?gene=PCLO</a>            |
| NDUFB4       | NADH:Ubiquinone Oxidoreductase Subunit B4             | Protein Coding    | 40 | GC03P120596 | 4.13 <a href="https://www.genecards.org/cgi-bin/carddisp.pl?gene=NDUFB4">https://www.genecards.org/cgi-bin/carddisp.pl?gene=NDUFB4</a>        |
| NDUFB5       | NADH:Ubiquinone Oxidoreductase Subunit B5             | Protein Coding    | 36 | GC03P179604 | 4.13 <a href="https://www.genecards.org/cgi-bin/carddisp.pl?gene=NDUFB5">https://www.genecards.org/cgi-bin/carddisp.pl?gene=NDUFB5</a>        |
| CYP8B1       | Cytochrome P450 Family 8 Subfamily B Member 1         | Protein Coding    | 40 | GC03M042856 | 4.12 <a href="https://www.genecards.org/cgi-bin/carddisp.pl?gene=CYP8B1">https://www.genecards.org/cgi-bin/carddisp.pl?gene=CYP8B1</a>        |
| LCP1         | Lymphocyte Cytosolic Protein 1                        | Protein Coding    | 41 | GC13M046132 | 4.11 <a href="https://www.genecards.org/cgi-bin/carddisp.pl?gene=LCP1">https://www.genecards.org/cgi-bin/carddisp.pl?gene=LCP1</a>            |
| SIPA1L2      | Signal Induced Proliferation Associated 1 Like 2      | Protein Coding    | 38 | GC01M232397 | 4.1 <a href="https://www.genecards.org/cgi-bin/carddisp.pl?gene=SIPA1L2">https://www.genecards.org/cgi-bin/carddisp.pl?gene=SIPA1L2</a>       |
| PPP3CA       | Protein Phosphatase 3 Catalytic Subunit Alpha         | Protein Coding    | 52 | GC04M101024 | 4.1 <a href="https://www.genecards.org/cgi-bin/carddisp.pl?gene=PPP3CA">https://www.genecards.org/cgi-bin/carddisp.pl?gene=PPP3CA</a>         |
| LOC110806262 | Solute Carrier Family 6 Member 4 Gene Promoter        | Biological Region | 1  | GC17P030235 | 4.1 <a href="https://www.genecards.org/cgi-bin/carddisp.pl?gene=LOC1108062">https://www.genecards.org/cgi-bin/carddisp.pl?gene=LOC1108062</a> |
| SIRT4        | Sirtuin 4                                             | Protein Coding    | 40 | GC12P120291 | 4.1 <a href="https://www.genecards.org/cgi-bin/carddisp.pl?gene=SIRT4">https://www.genecards.org/cgi-bin/carddisp.pl?gene=SIRT4</a>           |
| APLN         | Apelin                                                | Protein Coding    | 37 | GC0XM129645 | 4.1 <a href="https://www.genecards.org/cgi-bin/carddisp.pl?gene=APLN">https://www.genecards.org/cgi-bin/carddisp.pl?gene=APLN</a>             |
| HIGD1A       | HIG1 Hypoxia Inducible Domain Family Member 1A        | Protein Coding    | 38 | GC03M042782 | 4.1 <a href="https://www.genecards.org/cgi-bin/carddisp.pl?gene=HIGD1A">https://www.genecards.org/cgi-bin/carddisp.pl?gene=HIGD1A</a>         |
| MAP3K7       | Mitogen-Activated Protein Kinase Kinase Kinase 7      | Protein Coding    | 51 | GC06M090513 | 4.09 <a href="https://www.genecards.org/cgi-bin/carddisp.pl?gene=MAP3K7">https://www.genecards.org/cgi-bin/carddisp.pl?gene=MAP3K7</a>        |
| NDUFB2       | NADH:Ubiquinone Oxidoreductase Subunit B2             | Protein Coding    | 39 | GC07P140690 | 4.08 <a href="https://www.genecards.org/cgi-bin/carddisp.pl?gene=NDUFB2">https://www.genecards.org/cgi-bin/carddisp.pl?gene=NDUFB2</a>        |
| PDGFC        | Platelet Derived Growth Factor C                      | Protein Coding    | 43 | GC04M156760 | 4.08 <a href="https://www.genecards.org/cgi-bin/carddisp.pl?gene=PDGFC">https://www.genecards.org/cgi-bin/carddisp.pl?gene=PDGFC</a>          |
| RORA         | RAR Related Orphan Receptor A                         | Protein Coding    | 48 | GC15M060488 | 4.07 <a href="https://www.genecards.org/cgi-bin/carddisp.pl?gene=RORA">https://www.genecards.org/cgi-bin/carddisp.pl?gene=RORA</a>            |
| TPM4         | Tropomyosin 4                                         | Protein Coding    | 40 | GC19P023264 | 4.07 <a href="https://www.genecards.org/cgi-bin/carddisp.pl?gene=TPM4">https://www.genecards.org/cgi-bin/carddisp.pl?gene=TPM4</a>            |
| COX5B        | Cytochrome C Oxidase Subunit 5B                       | Protein Coding    | 41 | GC02P097628 | 4.06 <a href="https://www.genecards.org/cgi-bin/carddisp.pl?gene=COX5B">https://www.genecards.org/cgi-bin/carddisp.pl?gene=COX5B</a>          |
| PRKDC        | Protein Kinase, DNA-Activated, Catalytic Subunit      | Protein Coding    | 49 | GC08M047773 | 4.05 <a href="https://www.genecards.org/cgi-bin/carddisp.pl?gene=PRKDC">https://www.genecards.org/cgi-bin/carddisp.pl?gene=PRKDC</a>          |
| SLC4A4       | Solute Carrier Family 4 Member 4                      | Protein Coding    | 46 | GC04P071063 | 4.01 <a href="https://www.genecards.org/cgi-bin/carddisp.pl?gene=SLC4A4">https://www.genecards.org/cgi-bin/carddisp.pl?gene=SLC4A4</a>        |
| NDUFC1       | NADH:Ubiquinone Oxidoreductase Subunit C1             | Protein Coding    | 36 | GC04M139267 | 4.01 <a href="https://www.genecards.org/cgi-bin/carddisp.pl?gene=NDUFC1">https://www.genecards.org/cgi-bin/carddisp.pl?gene=NDUFC1</a>        |
| NDUFA7       | NADH:Ubiquinone Oxidoreductase Subunit A7             | Protein Coding    | 37 | GC19M008308 | 4.01 <a href="https://www.genecards.org/cgi-bin/carddisp.pl?gene=NDUFA7">https://www.genecards.org/cgi-bin/carddisp.pl?gene=NDUFA7</a>        |
| TFAP2B       | Transcription Factor AP-2 Beta                        | Protein Coding    | 44 | GC06P050894 | 4 <a href="https://www.genecards.org/cgi-bin/carddisp.pl?gene=TFAP2B">https://www.genecards.org/cgi-bin/carddisp.pl?gene=TFAP2B</a>           |
| UQCRL10      | Ubiquinol-Cytochrome C Reductase, Complex III Subunit | Protein Coding    | 37 | GC22P029767 | 3.97 <a href="https://www.genecards.org/cgi-bin/carddisp.pl?gene=UQCRL10">https://www.genecards.org/cgi-bin/carddisp.pl?gene=UQCRL10</a>      |
| UQCRH        | Ubiquinol-Cytochrome C Reductase Hinge Protein        | Protein Coding    | 39 | GC01P046303 | 3.96 <a href="https://www.genecards.org/cgi-bin/carddisp.pl?gene=UQCRH">https://www.genecards.org/cgi-bin/carddisp.pl?gene=UQCRH</a>          |
| NDUFB1       | NADH:Ubiquinone Oxidoreductase Subunit B1             | Protein Coding    | 37 | GC14M092116 | 3.95 <a href="https://www.genecards.org/cgi-bin/carddisp.pl?gene=NDUFB1">https://www.genecards.org/cgi-bin/carddisp.pl?gene=NDUFB1</a>        |
| MIR363       | MicroRNA 363                                          | RNA Gene          | 15 | GC0XM134205 | 3.95 <a href="https://www.genecards.org/cgi-bin/carddisp.pl?gene=MIR363">https://www.genecards.org/cgi-bin/carddisp.pl?gene=MIR363</a>        |
| NDUFV3       | NADH:Ubiquinone Oxidoreductase Subunit V3             | Protein Coding    | 40 | GC21P042879 | 3.93 <a href="https://www.genecards.org/cgi-bin/carddisp.pl?gene=NDUFV3">https://www.genecards.org/cgi-bin/carddisp.pl?gene=NDUFV3</a>        |

|          |                                                       |                |    |             |      |                                                                                                                                       |
|----------|-------------------------------------------------------|----------------|----|-------------|------|---------------------------------------------------------------------------------------------------------------------------------------|
| NFIC     | Nuclear Factor I C                                    | Protein Coding | 40 | GC19P003314 | 3.92 | <a href="https://www.genecards.org/cgi-bin/carddisp.pl?gene=NFIC">https://www.genecards.org/cgi-bin/carddisp.pl?gene=NFIC</a>         |
| PZP      | PZP Alpha-2-Macroglobulin Like                        | Protein Coding | 39 | GC12M009148 | 3.91 | <a href="https://www.genecards.org/cgi-bin/carddisp.pl?gene=PZP">https://www.genecards.org/cgi-bin/carddisp.pl?gene=PZP</a>           |
| CFL1     | Cofilin 1                                             | Protein Coding | 45 | GC11M065823 | 3.91 | <a href="https://www.genecards.org/cgi-bin/carddisp.pl?gene=CFL1">https://www.genecards.org/cgi-bin/carddisp.pl?gene=CFL1</a>         |
| YIPF1    | Yip1 Domain Family Member 1                           | Protein Coding | 36 | GC01M053851 | 3.9  | <a href="https://www.genecards.org/cgi-bin/carddisp.pl?gene=YIPF1">https://www.genecards.org/cgi-bin/carddisp.pl?gene=YIPF1</a>       |
| COX7A1   | Cytochrome C Oxidase Subunit 7A1                      | Protein Coding | 37 | GC19M042546 | 3.88 | <a href="https://www.genecards.org/cgi-bin/carddisp.pl?gene=COX7A1">https://www.genecards.org/cgi-bin/carddisp.pl?gene=COX7A1</a>     |
| HNRNPU   | Heterogeneous Nuclear Ribonucleoprotein U             | Protein Coding | 42 | GC01M244844 | 3.88 | <a href="https://www.genecards.org/cgi-bin/carddisp.pl?gene=HNRNPU">https://www.genecards.org/cgi-bin/carddisp.pl?gene=HNRNPU</a>     |
| PUF60    | Poly(U) Binding Splicing Factor 60                    | Protein Coding | 41 | GC08M143816 | 3.88 | <a href="https://www.genecards.org/cgi-bin/carddisp.pl?gene=PUF60">https://www.genecards.org/cgi-bin/carddisp.pl?gene=PUF60</a>       |
| CXCL16   | C-X-C Motif Chemokine Ligand 16                       | Protein Coding | 40 | GC17M004733 | 3.87 | <a href="https://www.genecards.org/cgi-bin/carddisp.pl?gene=CXCL16">https://www.genecards.org/cgi-bin/carddisp.pl?gene=CXCL16</a>     |
| AQP9     | Aquaporin 9                                           | Protein Coding | 43 | GC15P058138 | 3.87 | <a href="https://www.genecards.org/cgi-bin/carddisp.pl?gene=AQP9">https://www.genecards.org/cgi-bin/carddisp.pl?gene=AQP9</a>         |
| HSPA6    | Heat Shock Protein Family A (Hsp70) Member 6          | Protein Coding | 44 | GC01P161524 | 3.87 | <a href="https://www.genecards.org/cgi-bin/carddisp.pl?gene=HSPA6">https://www.genecards.org/cgi-bin/carddisp.pl?gene=HSPA6</a>       |
| SIRT5    | Sirtuin 5                                             | Protein Coding | 45 | GC06P013574 | 3.86 | <a href="https://www.genecards.org/cgi-bin/carddisp.pl?gene=SIRT5">https://www.genecards.org/cgi-bin/carddisp.pl?gene=SIRT5</a>       |
| COX7C    | Cytochrome C Oxidase Subunit 7C                       | Protein Coding | 38 | GC05P086617 | 3.86 | <a href="https://www.genecards.org/cgi-bin/carddisp.pl?gene=COX7C">https://www.genecards.org/cgi-bin/carddisp.pl?gene=COX7C</a>       |
| ARRDC3   | Arrestin Domain Containing 3                          | Protein Coding | 37 | GC05M091368 | 3.84 | <a href="https://www.genecards.org/cgi-bin/carddisp.pl?gene=ARRDC3">https://www.genecards.org/cgi-bin/carddisp.pl?gene=ARRDC3</a>     |
| PTPRU    | Protein Tyrosine Phosphatase Receptor Type U          | Protein Coding | 41 | GC01P029236 | 3.83 | <a href="https://www.genecards.org/cgi-bin/carddisp.pl?gene=PTPRU">https://www.genecards.org/cgi-bin/carddisp.pl?gene=PTPRU</a>       |
| COX7A2L  | Cytochrome C Oxidase Subunit 7A2 Like                 | Protein Coding | 40 | GC02M042312 | 3.82 | <a href="https://www.genecards.org/cgi-bin/carddisp.pl?gene=COX7A2L">https://www.genecards.org/cgi-bin/carddisp.pl?gene=COX7A2L</a>   |
| LEMD2    | LEM Domain Nuclear Envelope Protein 2                 | Protein Coding | 39 | GC06M033772 | 3.82 | <a href="https://www.genecards.org/cgi-bin/carddisp.pl?gene=LEMD2">https://www.genecards.org/cgi-bin/carddisp.pl?gene=LEMD2</a>       |
| HTR1B    | 5-Hydroxytryptamine Receptor 1B                       | Protein Coding | 45 | GC06M077478 | 3.81 | <a href="https://www.genecards.org/cgi-bin/carddisp.pl?gene=HTR1B">https://www.genecards.org/cgi-bin/carddisp.pl?gene=HTR1B</a>       |
| AHNAK    | AHNAK Nucleoprotein                                   | Protein Coding | 36 | GC11M063360 | 3.8  | <a href="https://www.genecards.org/cgi-bin/carddisp.pl?gene=AHNAK">https://www.genecards.org/cgi-bin/carddisp.pl?gene=AHNAK</a>       |
| CLTC     | Clathrin Heavy Chain                                  | Protein Coding | 46 | GC17P059619 | 3.8  | <a href="https://www.genecards.org/cgi-bin/carddisp.pl?gene=CLTC">https://www.genecards.org/cgi-bin/carddisp.pl?gene=CLTC</a>         |
| SLC9A9   | Solute Carrier Family 9 Member A9                     | Protein Coding | 39 | GC03M143265 | 3.8  | <a href="https://www.genecards.org/cgi-bin/carddisp.pl?gene=SLC9A9">https://www.genecards.org/cgi-bin/carddisp.pl?gene=SLC9A9</a>     |
| ALPI     | Alkaline Phosphatase, Intestinal                      | Protein Coding | 43 | GC02P232456 | 3.79 | <a href="https://www.genecards.org/cgi-bin/carddisp.pl?gene=ALPI">https://www.genecards.org/cgi-bin/carddisp.pl?gene=ALPI</a>         |
| NDUFA4L2 | NDUFA4 Mitochondrial Complex Associated Like 2        | Protein Coding | 36 | GC12M057234 | 3.79 | <a href="https://www.genecards.org/cgi-bin/carddisp.pl?gene=NDUFA4L2">https://www.genecards.org/cgi-bin/carddisp.pl?gene=NDUFA4L2</a> |
| HSD17B13 | Hydroxysteroid 17-Beta Dehydrogenase 13               | Protein Coding | 36 | GC04M087303 | 3.78 | <a href="https://www.genecards.org/cgi-bin/carddisp.pl?gene=HSD17B13">https://www.genecards.org/cgi-bin/carddisp.pl?gene=HSD17B13</a> |
| HDAC8    | Histone Deacetylase 8                                 | Protein Coding | 47 | GC0XM072329 | 3.77 | <a href="https://www.genecards.org/cgi-bin/carddisp.pl?gene=HDAC8">https://www.genecards.org/cgi-bin/carddisp.pl?gene=HDAC8</a>       |
| RIPK3    | Receptor Interacting Serine/Threonine Kinase 3        | Protein Coding | 43 | GC14M024336 | 3.77 | <a href="https://www.genecards.org/cgi-bin/carddisp.pl?gene=RIPK3">https://www.genecards.org/cgi-bin/carddisp.pl?gene=RIPK3</a>       |
| STEAP4   | STEAP4 Metalloreductase                               | Protein Coding | 40 | GC07M088288 | 3.77 | <a href="https://www.genecards.org/cgi-bin/carddisp.pl?gene=STEAP4">https://www.genecards.org/cgi-bin/carddisp.pl?gene=STEAP4</a>     |
| EEF1A1   | Eukaryotic Translation Elongation Factor 1 Alpha 1    | Protein Coding | 43 | GC06M073515 | 3.74 | <a href="https://www.genecards.org/cgi-bin/carddisp.pl?gene=EEF1A1">https://www.genecards.org/cgi-bin/carddisp.pl?gene=EEF1A1</a>     |
| MACROD2  | Mono-ADP Ribosylhydrolase 2                           | Protein Coding | 35 | GC20P013925 | 3.73 | <a href="https://www.genecards.org/cgi-bin/carddisp.pl?gene=MACROD2">https://www.genecards.org/cgi-bin/carddisp.pl?gene=MACROD2</a>   |
| SEMA5A   | Semaphorin 5A                                         | Protein Coding | 41 | GC05M009036 | 3.72 | <a href="https://www.genecards.org/cgi-bin/carddisp.pl?gene=SEMA5A">https://www.genecards.org/cgi-bin/carddisp.pl?gene=SEMA5A</a>     |
| ADH5     | Alcohol Dehydrogenase 5 (Class III), Chi Polypeptide  | Protein Coding | 45 | GC04M099070 | 3.71 | <a href="https://www.genecards.org/cgi-bin/carddisp.pl?gene=ADH5">https://www.genecards.org/cgi-bin/carddisp.pl?gene=ADH5</a>         |
| MAPK12   | Mitogen-Activated Protein Kinase 12                   | Protein Coding | 48 | GC22M050246 | 3.7  | <a href="https://www.genecards.org/cgi-bin/carddisp.pl?gene=MAPK12">https://www.genecards.org/cgi-bin/carddisp.pl?gene=MAPK12</a>     |
| CMKLR1   | Chemerin Chemokine-Like Receptor 1                    | Protein Coding | 40 | GC12M108288 | 3.69 | <a href="https://www.genecards.org/cgi-bin/carddisp.pl?gene=CMKLR1">https://www.genecards.org/cgi-bin/carddisp.pl?gene=CMKLR1</a>     |
| IL34     | Interleukin 34                                        | Protein Coding | 39 | GC16P070613 | 3.65 | <a href="https://www.genecards.org/cgi-bin/carddisp.pl?gene=IL34">https://www.genecards.org/cgi-bin/carddisp.pl?gene=IL34</a>         |
| ADH1A    | Alcohol Dehydrogenase 1A (Class I), Alpha Polypeptide | Protein Coding | 42 | GC04M099276 | 3.64 | <a href="https://www.genecards.org/cgi-bin/carddisp.pl?gene=ADH1A">https://www.genecards.org/cgi-bin/carddisp.pl?gene=ADH1A</a>       |
| CCAR2    | Cell Cycle And Apoptosis Regulator 2                  | Protein Coding | 36 | GC08P022604 | 3.63 | <a href="https://www.genecards.org/cgi-bin/carddisp.pl?gene=CCAR2">https://www.genecards.org/cgi-bin/carddisp.pl?gene=CCAR2</a>       |
| CCT4     | Chaperonin Containing TCP1 Subunit 4                  | Protein Coding | 39 | GC02M061868 | 3.63 | <a href="https://www.genecards.org/cgi-bin/carddisp.pl?gene=CCT4">https://www.genecards.org/cgi-bin/carddisp.pl?gene=CCT4</a>         |
| ESM1     | Endothelial Cell Specific Molecule 1                  | Protein Coding | 40 | GC05M054977 | 3.63 | <a href="https://www.genecards.org/cgi-bin/carddisp.pl?gene=ESM1">https://www.genecards.org/cgi-bin/carddisp.pl?gene=ESM1</a>         |
| PNPLA7   | Patatin Like Phospholipase Domain Containing 7        | Protein Coding | 35 | GC09M137459 | 3.62 | <a href="https://www.genecards.org/cgi-bin/carddisp.pl?gene=PNPLA7">https://www.genecards.org/cgi-bin/carddisp.pl?gene=PNPLA7</a>     |
| ELK1     | ETS Transcription Factor ELK1                         | Protein Coding | 44 | GC0XM047635 | 3.59 | <a href="https://www.genecards.org/cgi-bin/carddisp.pl?gene=ELK1">https://www.genecards.org/cgi-bin/carddisp.pl?gene=ELK1</a>         |

|               |                                                    |                |    |             |                                                                                                                                              |
|---------------|----------------------------------------------------|----------------|----|-------------|----------------------------------------------------------------------------------------------------------------------------------------------|
| EHBP1L1       | EH Domain Binding Protein 1 Like 1                 | Protein Coding | 32 | GC11P065814 | 3.58 <a href="https://www.genecards.org/cgi-bin/carddisp.pl?gene=EHBP1L1">https://www.genecards.org/cgi-bin/carddisp.pl?gene=EHBP1L1</a>     |
| LINC01016     | Long Intergenic Non-Protein Coding RNA 1016        | RNA Gene       | 13 | GC06M042348 | 3.56 <a href="https://www.genecards.org/cgi-bin/carddisp.pl?gene=LINC01016">https://www.genecards.org/cgi-bin/carddisp.pl?gene=LINC01016</a> |
| KAT5          | Lysine Acetyltransferase 5                         | Protein Coding | 46 | GC11P065711 | 3.56 <a href="https://www.genecards.org/cgi-bin/carddisp.pl?gene=KAT5">https://www.genecards.org/cgi-bin/carddisp.pl?gene=KAT5</a>           |
| PSMC2         | Proteasome 26S Subunit, ATPase 2                   | Protein Coding | 40 | GC07P103344 | 3.55 <a href="https://www.genecards.org/cgi-bin/carddisp.pl?gene=PSMC2">https://www.genecards.org/cgi-bin/carddisp.pl?gene=PSMC2</a>         |
| GRK2          | G Protein-Coupled Receptor Kinase 2                | Protein Coding | 37 | GC11P067266 | 3.55 <a href="https://www.genecards.org/cgi-bin/carddisp.pl?gene=GRK2">https://www.genecards.org/cgi-bin/carddisp.pl?gene=GRK2</a>           |
| RPL3          | Ribosomal Protein L3                               | Protein Coding | 41 | GC22M045394 | 3.54 <a href="https://www.genecards.org/cgi-bin/carddisp.pl?gene=RPL3">https://www.genecards.org/cgi-bin/carddisp.pl?gene=RPL3</a>           |
| CD5L          | CD5 Molecule Like                                  | Protein Coding | 39 | GC01M157800 | 3.54 <a href="https://www.genecards.org/cgi-bin/carddisp.pl?gene=CD5L">https://www.genecards.org/cgi-bin/carddisp.pl?gene=CD5L</a>           |
| TNFRSF12A     | TNF Receptor Superfamily Member 12A                | Protein Coding | 44 | GC16P003018 | 3.54 <a href="https://www.genecards.org/cgi-bin/carddisp.pl?gene=TNFRSF12A">https://www.genecards.org/cgi-bin/carddisp.pl?gene=TNFRSF12A</a> |
| COX7B2        | Cytochrome C Oxidase Subunit 7B2                   | Protein Coding | 32 | GC04M046734 | 3.54 <a href="https://www.genecards.org/cgi-bin/carddisp.pl?gene=COX7B2">https://www.genecards.org/cgi-bin/carddisp.pl?gene=COX7B2</a>       |
| CRACR2A       | Calcium Release Activated Channel Regulator 2A     | Protein Coding | 31 | GC12M004102 | 3.52 <a href="https://www.genecards.org/cgi-bin/carddisp.pl?gene=CRACR2A">https://www.genecards.org/cgi-bin/carddisp.pl?gene=CRACR2A</a>     |
| RPS15         | Ribosomal Protein S15                              | Protein Coding | 41 | GC19P001438 | 3.51 <a href="https://www.genecards.org/cgi-bin/carddisp.pl?gene=RPS15">https://www.genecards.org/cgi-bin/carddisp.pl?gene=RPS15</a>         |
| COX6B2        | Cytochrome C Oxidase Subunit 6B2                   | Protein Coding | 32 | GC19M055350 | 3.51 <a href="https://www.genecards.org/cgi-bin/carddisp.pl?gene=COX6B2">https://www.genecards.org/cgi-bin/carddisp.pl?gene=COX6B2</a>       |
| NOS1AP        | Nitric Oxide Synthase 1 Adaptor Protein            | Protein Coding | 37 | GC01P162069 | 3.5 <a href="https://www.genecards.org/cgi-bin/carddisp.pl?gene=NOS1AP">https://www.genecards.org/cgi-bin/carddisp.pl?gene=NOS1AP</a>        |
| SLC25A47      | Solute Carrier Family 25 Member 47                 | Protein Coding | 35 | GC14P100323 | 3.5 <a href="https://www.genecards.org/cgi-bin/carddisp.pl?gene=SLC25A47">https://www.genecards.org/cgi-bin/carddisp.pl?gene=SLC25A47</a>    |
| PRDX5         | Peroxisredoxin 5                                   | Protein Coding | 46 | GC11P064317 | 3.5 <a href="https://www.genecards.org/cgi-bin/carddisp.pl?gene=PRDX5">https://www.genecards.org/cgi-bin/carddisp.pl?gene=PRDX5</a>          |
| ATF3          | Activating Transcription Factor 3                  | Protein Coding | 44 | GC01P212565 | 3.49 <a href="https://www.genecards.org/cgi-bin/carddisp.pl?gene=ATF3">https://www.genecards.org/cgi-bin/carddisp.pl?gene=ATF3</a>           |
| TRAF3         | TNF Receptor Associated Factor 3                   | Protein Coding | 47 | GC14P104639 | 3.49 <a href="https://www.genecards.org/cgi-bin/carddisp.pl?gene=TRAF3">https://www.genecards.org/cgi-bin/carddisp.pl?gene=TRAF3</a>         |
| USP7          | Ubiquitin Specific Peptidase 7                     | Protein Coding | 47 | GC16M008892 | 3.49 <a href="https://www.genecards.org/cgi-bin/carddisp.pl?gene=USP7">https://www.genecards.org/cgi-bin/carddisp.pl?gene=USP7</a>           |
| NGF-AS1       | NGF Antisense RNA 1                                | RNA Gene       | 9  | GC01P115287 | 3.49 <a href="https://www.genecards.org/cgi-bin/carddisp.pl?gene=NGF-AS1">https://www.genecards.org/cgi-bin/carddisp.pl?gene=NGF-AS1</a>     |
| NDUFC2-KCTD14 | NDUFC2-KCTD14 Readthrough                          | Protein Coding | 21 | GC11M078015 | 3.49 <a href="https://www.genecards.org/cgi-bin/carddisp.pl?gene=NDUFC2-KC">https://www.genecards.org/cgi-bin/carddisp.pl?gene=NDUFC2-KC</a> |
| MIR103A2      | MicroRNA 103a-2                                    | RNA Gene       | 18 | GC20P003917 | 3.48 <a href="https://www.genecards.org/cgi-bin/carddisp.pl?gene=MIR103A2">https://www.genecards.org/cgi-bin/carddisp.pl?gene=MIR103A2</a>   |
| BIRC2         | Baculoviral IAP Repeat Containing 2                | Protein Coding | 45 | GC11P102347 | 3.47 <a href="https://www.genecards.org/cgi-bin/carddisp.pl?gene=BIRC2">https://www.genecards.org/cgi-bin/carddisp.pl?gene=BIRC2</a>         |
| IL1R2         | Interleukin 1 Receptor Type 2                      | Protein Coding | 45 | GC02P101991 | 3.46 <a href="https://www.genecards.org/cgi-bin/carddisp.pl?gene=IL1R2">https://www.genecards.org/cgi-bin/carddisp.pl?gene=IL1R2</a>         |
| FARP1         | FERM, ARH/RhoGEF And Pleckstrin Domain Protein     | Protein Coding | 38 | GC13P098142 | 3.46 <a href="https://www.genecards.org/cgi-bin/carddisp.pl?gene=FARP1">https://www.genecards.org/cgi-bin/carddisp.pl?gene=FARP1</a>         |
| GPN1          | GPN-Loop GTPase 1                                  | Protein Coding | 37 | GC02P027628 | 3.46 <a href="https://www.genecards.org/cgi-bin/carddisp.pl?gene=GPN1">https://www.genecards.org/cgi-bin/carddisp.pl?gene=GPN1</a>           |
| NRG3          | Neuregulin 3                                       | Protein Coding | 41 | GC10P083672 | 3.45 <a href="https://www.genecards.org/cgi-bin/carddisp.pl?gene=NRG3">https://www.genecards.org/cgi-bin/carddisp.pl?gene=NRG3</a>           |
| CISD2         | CDGSH Iron Sulfur Domain 2                         | Protein Coding | 41 | GC04P102868 | 3.45 <a href="https://www.genecards.org/cgi-bin/carddisp.pl?gene=CISD2">https://www.genecards.org/cgi-bin/carddisp.pl?gene=CISD2</a>         |
| PCSK5         | Proprotein Convertase Subtilisin/Kexin Type 5      | Protein Coding | 41 | GC09P075890 | 3.45 <a href="https://www.genecards.org/cgi-bin/carddisp.pl?gene=PCSK5">https://www.genecards.org/cgi-bin/carddisp.pl?gene=PCSK5</a>         |
| UQCRHL        | Ubiquinol-Cytochrome C Reductase Hinge Protein Lik | Protein Coding | 23 | GC01M015808 | 3.45 <a href="https://www.genecards.org/cgi-bin/carddisp.pl?gene=UQCRHL">https://www.genecards.org/cgi-bin/carddisp.pl?gene=UQCRHL</a>       |
| MIR361        | MicroRNA 361                                       | RNA Gene       | 16 | GC0XM085903 | 3.43 <a href="https://www.genecards.org/cgi-bin/carddisp.pl?gene=MIR361">https://www.genecards.org/cgi-bin/carddisp.pl?gene=MIR361</a>       |
| SDC2          | Syndecan 2                                         | Protein Coding | 45 | GC08P096494 | 3.42 <a href="https://www.genecards.org/cgi-bin/carddisp.pl?gene=SDC2">https://www.genecards.org/cgi-bin/carddisp.pl?gene=SDC2</a>           |
| EGFL6         | EGF Like Domain Multiple 6                         | Protein Coding | 38 | GC0XP013569 | 3.42 <a href="https://www.genecards.org/cgi-bin/carddisp.pl?gene=EGFL6">https://www.genecards.org/cgi-bin/carddisp.pl?gene=EGFL6</a>         |
| SLC25A3       | Solute Carrier Family 25 Member 3                  | Protein Coding | 45 | GC12P098593 | 3.42 <a href="https://www.genecards.org/cgi-bin/carddisp.pl?gene=SLC25A3">https://www.genecards.org/cgi-bin/carddisp.pl?gene=SLC25A3</a>     |
| INHBA         | Inhibin Subunit Beta A                             | Protein Coding | 45 | GC07M041668 | 3.41 <a href="https://www.genecards.org/cgi-bin/carddisp.pl?gene=INHBA">https://www.genecards.org/cgi-bin/carddisp.pl?gene=INHBA</a>         |
| FAM166B       | Family With Sequence Similarity 166 Member B       | Protein Coding | 30 | GC09M035554 | 3.41 <a href="https://www.genecards.org/cgi-bin/carddisp.pl?gene=FAM166B">https://www.genecards.org/cgi-bin/carddisp.pl?gene=FAM166B</a>     |
| ESRRG         | Estrogen Related Receptor Gamma                    | Protein Coding | 45 | GC01M216503 | 3.4 <a href="https://www.genecards.org/cgi-bin/carddisp.pl?gene=ESRRG">https://www.genecards.org/cgi-bin/carddisp.pl?gene=ESRRG</a>          |
| DDX60L        | DExD/H-Box 60 Like                                 | Protein Coding | 33 | GC04M168356 | 3.4 <a href="https://www.genecards.org/cgi-bin/carddisp.pl?gene=DDX60L">https://www.genecards.org/cgi-bin/carddisp.pl?gene=DDX60L</a>        |
| AQP7          | Aquaporin 7                                        | Protein Coding | 44 | GC09M033384 | 3.4 <a href="https://www.genecards.org/cgi-bin/carddisp.pl?gene=AQP7">https://www.genecards.org/cgi-bin/carddisp.pl?gene=AQP7</a>            |
| HNMT          | Histamine N-Methyltransferase                      | Protein Coding | 45 | GC02P137964 | 3.39 <a href="https://www.genecards.org/cgi-bin/carddisp.pl?gene=HNMT">https://www.genecards.org/cgi-bin/carddisp.pl?gene=HNMT</a>           |

|          |                                                       |                |    |             |      |                                                                                                                                       |
|----------|-------------------------------------------------------|----------------|----|-------------|------|---------------------------------------------------------------------------------------------------------------------------------------|
| ADAMTS9  | ADAM Metallopeptidase With Thrombospondin Type        | Protein Coding | 37 | GC03M064501 | 3.39 | <a href="https://www.genecards.org/cgi-bin/carddisp.pl?gene=ADAMTS9">https://www.genecards.org/cgi-bin/carddisp.pl?gene=ADAMTS9</a>   |
| DGCR8    | DGCR8 Microprocessor Complex Subunit                  | Protein Coding | 40 | GC22P020080 | 3.39 | <a href="https://www.genecards.org/cgi-bin/carddisp.pl?gene=DGCR8">https://www.genecards.org/cgi-bin/carddisp.pl?gene=DGCR8</a>       |
| RPTOR    | Regulatory Associated Protein Of MTOR Complex 1       | Protein Coding | 44 | GC17P080544 | 3.38 | <a href="https://www.genecards.org/cgi-bin/carddisp.pl?gene=RPTOR">https://www.genecards.org/cgi-bin/carddisp.pl?gene=RPTOR</a>       |
| IGHG1    | Immunoglobulin Heavy Constant Gamma 1 (G1m Mar        | Protein Coding | 32 | GC14M105736 | 3.38 | <a href="https://www.genecards.org/cgi-bin/carddisp.pl?gene=IGHG1">https://www.genecards.org/cgi-bin/carddisp.pl?gene=IGHG1</a>       |
| CAPSL    | Calcyphosine Like                                     | Protein Coding | 34 | GC05M035905 | 3.37 | <a href="https://www.genecards.org/cgi-bin/carddisp.pl?gene=CAPSL">https://www.genecards.org/cgi-bin/carddisp.pl?gene=CAPSL</a>       |
| EDA      | Ectodysplasin A                                       | Protein Coding | 41 | GC0XP069618 | 3.37 | <a href="https://www.genecards.org/cgi-bin/carddisp.pl?gene=EDA">https://www.genecards.org/cgi-bin/carddisp.pl?gene=EDA</a>           |
| MAP3K8   | Mitogen-Activated Protein Kinase Kinase Kinase 8      | Protein Coding | 47 | GC10P030458 | 3.37 | <a href="https://www.genecards.org/cgi-bin/carddisp.pl?gene=MAP3K8">https://www.genecards.org/cgi-bin/carddisp.pl?gene=MAP3K8</a>     |
| MIR103A1 | MicroRNA 103a-1                                       | RNA Gene       | 17 | GC05M168560 | 3.35 | <a href="https://www.genecards.org/cgi-bin/carddisp.pl?gene=MIR103A1">https://www.genecards.org/cgi-bin/carddisp.pl?gene=MIR103A1</a> |
| TAGLN    | Transgelin                                            | Protein Coding | 43 | GC11P117199 | 3.33 | <a href="https://www.genecards.org/cgi-bin/carddisp.pl?gene=TAGLN">https://www.genecards.org/cgi-bin/carddisp.pl?gene=TAGLN</a>       |
| STX17    | Syntaxin 17                                           | Protein Coding | 36 | GC09P099906 | 3.33 | <a href="https://www.genecards.org/cgi-bin/carddisp.pl?gene=STX17">https://www.genecards.org/cgi-bin/carddisp.pl?gene=STX17</a>       |
| TSHB     | Thyroid Stimulating Hormone Subunit Beta              | Protein Coding | 42 | GC01P115029 | 3.33 | <a href="https://www.genecards.org/cgi-bin/carddisp.pl?gene=TSHB">https://www.genecards.org/cgi-bin/carddisp.pl?gene=TSHB</a>         |
| PSMD2    | Proteasome 26S Subunit, Non-ATPase 2                  | Protein Coding | 43 | GC03P184298 | 3.32 | <a href="https://www.genecards.org/cgi-bin/carddisp.pl?gene=PSMD2">https://www.genecards.org/cgi-bin/carddisp.pl?gene=PSMD2</a>       |
| TP53BP2  | Tumor Protein P53 Binding Protein 2                   | Protein Coding | 42 | GC01M223779 | 3.32 | <a href="https://www.genecards.org/cgi-bin/carddisp.pl?gene=TP53BP2">https://www.genecards.org/cgi-bin/carddisp.pl?gene=TP53BP2</a>   |
| UGDH     | UDP-Glucose 6-Dehydrogenase                           | Protein Coding | 45 | GC04M039502 | 3.31 | <a href="https://www.genecards.org/cgi-bin/carddisp.pl?gene=UGDH">https://www.genecards.org/cgi-bin/carddisp.pl?gene=UGDH</a>         |
| LAPTM4A  | Lysosomal Protein Transmembrane 4 Alpha               | Protein Coding | 38 | GC02M020032 | 3.31 | <a href="https://www.genecards.org/cgi-bin/carddisp.pl?gene=LAPTM4A">https://www.genecards.org/cgi-bin/carddisp.pl?gene=LAPTM4A</a>   |
| NMT2     | N-Myristoyltransferase 2                              | Protein Coding | 40 | GC10M015144 | 3.31 | <a href="https://www.genecards.org/cgi-bin/carddisp.pl?gene=NMT2">https://www.genecards.org/cgi-bin/carddisp.pl?gene=NMT2</a>         |
| SOCS2    | Suppressor Of Cytokine Signaling 2                    | Protein Coding | 43 | GC12P093569 | 3.3  | <a href="https://www.genecards.org/cgi-bin/carddisp.pl?gene=SOCS2">https://www.genecards.org/cgi-bin/carddisp.pl?gene=SOCS2</a>       |
| PLPPR4   | Phospholipid Phosphatase Related 4                    | Protein Coding | 29 | GC01P099262 | 3.3  | <a href="https://www.genecards.org/cgi-bin/carddisp.pl?gene=PLPPR4">https://www.genecards.org/cgi-bin/carddisp.pl?gene=PLPPR4</a>     |
| CX3CL1   | C-X3-C Motif Chemokine Ligand 1                       | Protein Coding | 42 | GC16P057372 | 3.29 | <a href="https://www.genecards.org/cgi-bin/carddisp.pl?gene=CX3CL1">https://www.genecards.org/cgi-bin/carddisp.pl?gene=CX3CL1</a>     |
| AGAP1    | ArfGAP With GTPase Domain, Ankyrin Repeat And F       | Protein Coding | 39 | GC02P235494 | 3.28 | <a href="https://www.genecards.org/cgi-bin/carddisp.pl?gene=AGAP1">https://www.genecards.org/cgi-bin/carddisp.pl?gene=AGAP1</a>       |
| RPL7     | Ribosomal Protein L7                                  | Protein Coding | 41 | GC08M073290 | 3.28 | <a href="https://www.genecards.org/cgi-bin/carddisp.pl?gene=RPL7">https://www.genecards.org/cgi-bin/carddisp.pl?gene=RPL7</a>         |
| MOGAT2   | Monoacylglycerol O-Acyltransferase 2                  | Protein Coding | 38 | GC11P075717 | 3.26 | <a href="https://www.genecards.org/cgi-bin/carddisp.pl?gene=MOGAT2">https://www.genecards.org/cgi-bin/carddisp.pl?gene=MOGAT2</a>     |
| YWHAG    | Tyrosine 3-Monooxygenase/Tryptophan 5-Monooxyge       | Protein Coding | 49 | GC07M076327 | 3.25 | <a href="https://www.genecards.org/cgi-bin/carddisp.pl?gene=YWHAG">https://www.genecards.org/cgi-bin/carddisp.pl?gene=YWHAG</a>       |
| GPLD1    | Glycosylphosphatidylinositol Specific Phospholipase I | Protein Coding | 41 | GC06M024425 | 3.25 | <a href="https://www.genecards.org/cgi-bin/carddisp.pl?gene=GPLD1">https://www.genecards.org/cgi-bin/carddisp.pl?gene=GPLD1</a>       |
| CCRL2    | C-C Motif Chemokine Receptor Like 2                   | Protein Coding | 39 | GC03P046407 | 3.23 | <a href="https://www.genecards.org/cgi-bin/carddisp.pl?gene=CCRL2">https://www.genecards.org/cgi-bin/carddisp.pl?gene=CCRL2</a>       |
| CTBP2    | C-Terminal Binding Protein 2                          | Protein Coding | 44 | GC10M124984 | 3.22 | <a href="https://www.genecards.org/cgi-bin/carddisp.pl?gene=CTBP2">https://www.genecards.org/cgi-bin/carddisp.pl?gene=CTBP2</a>       |
| UGT1A5   | UDP Glucuronosyltransferase Family 1 Member A5        | Protein Coding | 33 | GC02P233712 | 3.21 | <a href="https://www.genecards.org/cgi-bin/carddisp.pl?gene=UGT1A5">https://www.genecards.org/cgi-bin/carddisp.pl?gene=UGT1A5</a>     |
| ARNT     | Aryl Hydrocarbon Receptor Nuclear Translocator        | Protein Coding | 43 | GC01M150809 | 3.2  | <a href="https://www.genecards.org/cgi-bin/carddisp.pl?gene=ARNT">https://www.genecards.org/cgi-bin/carddisp.pl?gene=ARNT</a>         |
| CDK8     | Cyclin Dependent Kinase 8                             | Protein Coding | 47 | GC13P026254 | 3.2  | <a href="https://www.genecards.org/cgi-bin/carddisp.pl?gene=CDK8">https://www.genecards.org/cgi-bin/carddisp.pl?gene=CDK8</a>         |
| RPN1     | Ribophorin I                                          | Protein Coding | 42 | GC03M128619 | 3.19 | <a href="https://www.genecards.org/cgi-bin/carddisp.pl?gene=RPN1">https://www.genecards.org/cgi-bin/carddisp.pl?gene=RPN1</a>         |
| GLO1     | Glyoxalase I                                          | Protein Coding | 45 | GC06M042239 | 3.17 | <a href="https://www.genecards.org/cgi-bin/carddisp.pl?gene=GLO1">https://www.genecards.org/cgi-bin/carddisp.pl?gene=GLO1</a>         |
| ST8SIA1  | ST8 Alpha-N-Acetyl-Neuraminide Alpha-2,8-Sialyltra    | Protein Coding | 41 | GC12M022063 | 3.16 | <a href="https://www.genecards.org/cgi-bin/carddisp.pl?gene=ST8SIA1">https://www.genecards.org/cgi-bin/carddisp.pl?gene=ST8SIA1</a>   |
| CREB5    | CAMP Responsive Element Binding Protein 5             | Protein Coding | 41 | GC07P028305 | 3.16 | <a href="https://www.genecards.org/cgi-bin/carddisp.pl?gene=CREB5">https://www.genecards.org/cgi-bin/carddisp.pl?gene=CREB5</a>       |
| YBX3     | Y-Box Binding Protein 3                               | Protein Coding | 39 | GC12M013875 | 3.16 | <a href="https://www.genecards.org/cgi-bin/carddisp.pl?gene=YBX3">https://www.genecards.org/cgi-bin/carddisp.pl?gene=YBX3</a>         |
| FAF2     | Fas Associated Factor Family Member 2                 | Protein Coding | 38 | GC05P176447 | 3.15 | <a href="https://www.genecards.org/cgi-bin/carddisp.pl?gene=FAF2">https://www.genecards.org/cgi-bin/carddisp.pl?gene=FAF2</a>         |
| MLXIP    | MLX Interacting Protein                               | Protein Coding | 33 | GC12P122078 | 3.14 | <a href="https://www.genecards.org/cgi-bin/carddisp.pl?gene=MLXIP">https://www.genecards.org/cgi-bin/carddisp.pl?gene=MLXIP</a>       |
| AQP3     | Aquaporin 3 (Gill Blood Group)                        | Protein Coding | 47 | GC09M033431 | 3.14 | <a href="https://www.genecards.org/cgi-bin/carddisp.pl?gene=AQP3">https://www.genecards.org/cgi-bin/carddisp.pl?gene=AQP3</a>         |
| CYGB     | Cytoglobin                                            | Protein Coding | 38 | GC17M076527 | 3.13 | <a href="https://www.genecards.org/cgi-bin/carddisp.pl?gene=CYGB">https://www.genecards.org/cgi-bin/carddisp.pl?gene=CYGB</a>         |
| YWHAQ    | Tyrosine 3-Monooxygenase/Tryptophan 5-Monooxyge       | Protein Coding | 47 | GC02M009583 | 3.12 | <a href="https://www.genecards.org/cgi-bin/carddisp.pl?gene=YWHAQ">https://www.genecards.org/cgi-bin/carddisp.pl?gene=YWHAQ</a>       |

|             |                                                                  |                |    |             |                                                                                                                                              |
|-------------|------------------------------------------------------------------|----------------|----|-------------|----------------------------------------------------------------------------------------------------------------------------------------------|
| SLC46A3     | Solute Carrier Family 46 Member 3                                | Protein Coding | 36 | GC13M028700 | 3.11 <a href="https://www.genecards.org/cgi-bin/carddisp.pl?gene=SLC46A3">https://www.genecards.org/cgi-bin/carddisp.pl?gene=SLC46A3</a>     |
| FRK         | Fyn Related Src Family Tyrosine Kinase                           | Protein Coding | 44 | GC06M115931 | 3.1 <a href="https://www.genecards.org/cgi-bin/carddisp.pl?gene=FRK">https://www.genecards.org/cgi-bin/carddisp.pl?gene=FRK</a>              |
| CCN4        | Cellular Communication Network Factor 4                          | Protein Coding | 31 | GC08P133192 | 3.1 <a href="https://www.genecards.org/cgi-bin/carddisp.pl?gene=CCN4">https://www.genecards.org/cgi-bin/carddisp.pl?gene=CCN4</a>            |
| FAP         | Fibroblast Activation Protein Alpha                              | Protein Coding | 42 | GC02M162170 | 3.1 <a href="https://www.genecards.org/cgi-bin/carddisp.pl?gene=FAP">https://www.genecards.org/cgi-bin/carddisp.pl?gene=FAP</a>              |
| OSBPL5      | Oxysterol Binding Protein Like 5                                 | Protein Coding | 40 | GC11M003088 | 3.09 <a href="https://www.genecards.org/cgi-bin/carddisp.pl?gene=OSBPL5">https://www.genecards.org/cgi-bin/carddisp.pl?gene=OSBPL5</a>       |
| TLCD4-RWDD3 | TLCD4-RWDD3 Readthrough                                          | Protein Coding | 16 | GC01P095119 | 3.07 <a href="https://www.genecards.org/cgi-bin/carddisp.pl?gene=TLCD4-RWC">https://www.genecards.org/cgi-bin/carddisp.pl?gene=TLCD4-RWC</a> |
| SVIL        | Supervillin                                                      | Protein Coding | 39 | GC10M030482 | 3.03 <a href="https://www.genecards.org/cgi-bin/carddisp.pl?gene=SVIL">https://www.genecards.org/cgi-bin/carddisp.pl?gene=SVIL</a>           |
| AATF        | Apoptosis Antagonizing Transcription Factor                      | Protein Coding | 40 | GC17P036948 | 3.03 <a href="https://www.genecards.org/cgi-bin/carddisp.pl?gene=AATF">https://www.genecards.org/cgi-bin/carddisp.pl?gene=AATF</a>           |
| ANKK1       | Ankyrin Repeat And Kinase Domain Containing 1                    | Protein Coding | 37 | GC11P113387 | 3.03 <a href="https://www.genecards.org/cgi-bin/carddisp.pl?gene=ANKK1">https://www.genecards.org/cgi-bin/carddisp.pl?gene=ANKK1</a>         |
| CWF19L1     | CWF19 Like Cell Cycle Control Factor 1                           | Protein Coding | 39 | GC10M100232 | 3.01 <a href="https://www.genecards.org/cgi-bin/carddisp.pl?gene=CWF19L1">https://www.genecards.org/cgi-bin/carddisp.pl?gene=CWF19L1</a>     |
| CYP2A13     | Cytochrome P450 Family 2 Subfamily A Member 13                   | Protein Coding | 41 | GC19P041088 | 3.01 <a href="https://www.genecards.org/cgi-bin/carddisp.pl?gene=CYP2A13">https://www.genecards.org/cgi-bin/carddisp.pl?gene=CYP2A13</a>     |
| HCFC1       | Host Cell Factor C1                                              | Protein Coding | 46 | GC0XM153947 | 3 <a href="https://www.genecards.org/cgi-bin/carddisp.pl?gene=HCFC1">https://www.genecards.org/cgi-bin/carddisp.pl?gene=HCFC1</a>            |
| MIR873      | MicroRNA 873                                                     | RNA Gene       | 16 | GC09M028880 | 3 <a href="https://www.genecards.org/cgi-bin/carddisp.pl?gene=MIR873">https://www.genecards.org/cgi-bin/carddisp.pl?gene=MIR873</a>          |
| CYP2F1      | Cytochrome P450 Family 2 Subfamily F Member 1                    | Protein Coding | 41 | GC19P041114 | 3 <a href="https://www.genecards.org/cgi-bin/carddisp.pl?gene=CYP2F1">https://www.genecards.org/cgi-bin/carddisp.pl?gene=CYP2F1</a>          |
| CALD1       | Caldesmon 1                                                      | Protein Coding | 42 | GC07P134744 | 3 <a href="https://www.genecards.org/cgi-bin/carddisp.pl?gene=CALD1">https://www.genecards.org/cgi-bin/carddisp.pl?gene=CALD1</a>            |
| HSP90AB1    | Heat Shock Protein 90 Alpha Family Class B Member                | Protein Coding | 45 | GC06P044246 | 2.99 <a href="https://www.genecards.org/cgi-bin/carddisp.pl?gene=HSP90AB1">https://www.genecards.org/cgi-bin/carddisp.pl?gene=HSP90AB1</a>   |
| ZFP90       | ZFP90 Zinc Finger Protein                                        | Protein Coding | 36 | GC16P068530 | 2.98 <a href="https://www.genecards.org/cgi-bin/carddisp.pl?gene=ZFP90">https://www.genecards.org/cgi-bin/carddisp.pl?gene=ZFP90</a>         |
| MYO6        | Myosin VI                                                        | Protein Coding | 45 | GC06P075749 | 2.97 <a href="https://www.genecards.org/cgi-bin/carddisp.pl?gene=MYO6">https://www.genecards.org/cgi-bin/carddisp.pl?gene=MYO6</a>           |
| ZNF512      | Zinc Finger Protein 512                                          | Protein Coding | 32 | GC02P027582 | 2.97 <a href="https://www.genecards.org/cgi-bin/carddisp.pl?gene=ZNF512">https://www.genecards.org/cgi-bin/carddisp.pl?gene=ZNF512</a>       |
| PDIA2       | Protein Disulfide Isomerase Family A Member 2                    | Protein Coding | 38 | GC16P001384 | 2.96 <a href="https://www.genecards.org/cgi-bin/carddisp.pl?gene=PDIA2">https://www.genecards.org/cgi-bin/carddisp.pl?gene=PDIA2</a>         |
| FETUB       | Fetuin B                                                         | Protein Coding | 36 | GC03P186635 | 2.95 <a href="https://www.genecards.org/cgi-bin/carddisp.pl?gene=FETUB">https://www.genecards.org/cgi-bin/carddisp.pl?gene=FETUB</a>         |
| BCAT1       | Branched Chain Amino Acid Transaminase 1                         | Protein Coding | 46 | GC12M024732 | 2.95 <a href="https://www.genecards.org/cgi-bin/carddisp.pl?gene=BCAT1">https://www.genecards.org/cgi-bin/carddisp.pl?gene=BCAT1</a>         |
| ADRB1       | Adrenoceptor Beta 1                                              | Protein Coding | 48 | GC10P114044 | 2.94 <a href="https://www.genecards.org/cgi-bin/carddisp.pl?gene=ADRB1">https://www.genecards.org/cgi-bin/carddisp.pl?gene=ADRB1</a>         |
| PCNX3       | Pecanex 3                                                        | Protein Coding | 25 | GC11P065830 | 2.93 <a href="https://www.genecards.org/cgi-bin/carddisp.pl?gene=PCNX3">https://www.genecards.org/cgi-bin/carddisp.pl?gene=PCNX3</a>         |
| SLC3A2      | Solute Carrier Family 3 Member 2                                 | Protein Coding | 42 | GC11P062856 | 2.93 <a href="https://www.genecards.org/cgi-bin/carddisp.pl?gene=SLC3A2">https://www.genecards.org/cgi-bin/carddisp.pl?gene=SLC3A2</a>       |
| TNR         | Tenascin R                                                       | Protein Coding | 41 | GC01M175291 | 2.92 <a href="https://www.genecards.org/cgi-bin/carddisp.pl?gene=TNR">https://www.genecards.org/cgi-bin/carddisp.pl?gene=TNR</a>             |
| AEBP1       | AE Binding Protein 1                                             | Protein Coding | 39 | GC07P044106 | 2.92 <a href="https://www.genecards.org/cgi-bin/carddisp.pl?gene=AEBP1">https://www.genecards.org/cgi-bin/carddisp.pl?gene=AEBP1</a>         |
| UBQLN4      | Ubiquilin 4                                                      | Protein Coding | 40 | GC01M156033 | 2.91 <a href="https://www.genecards.org/cgi-bin/carddisp.pl?gene=UBQLN4">https://www.genecards.org/cgi-bin/carddisp.pl?gene=UBQLN4</a>       |
| SEL1L3      | SEL1L Family Member 3                                            | Protein Coding | 33 | GC04M025715 | 2.9 <a href="https://www.genecards.org/cgi-bin/carddisp.pl?gene=SEL1L3">https://www.genecards.org/cgi-bin/carddisp.pl?gene=SEL1L3</a>        |
| TTF2        | Transcription Termination Factor 2                               | Protein Coding | 39 | GC01P117060 | 2.9 <a href="https://www.genecards.org/cgi-bin/carddisp.pl?gene=TTF2">https://www.genecards.org/cgi-bin/carddisp.pl?gene=TTF2</a>            |
| FOXK1       | Forkhead Box K1                                                  | Protein Coding | 35 | GC07P004682 | 2.9 <a href="https://www.genecards.org/cgi-bin/carddisp.pl?gene=FOXK1">https://www.genecards.org/cgi-bin/carddisp.pl?gene=FOXK1</a>          |
| ZP4         | Zona Pellucida Glycoprotein 4                                    | Protein Coding | 31 | GC01M237877 | 2.88 <a href="https://www.genecards.org/cgi-bin/carddisp.pl?gene=ZP4">https://www.genecards.org/cgi-bin/carddisp.pl?gene=ZP4</a>             |
| C2orf16     | Chromosome 2 Open Reading Frame 16                               | Protein Coding | 28 | GC02P027546 | 2.88 <a href="https://www.genecards.org/cgi-bin/carddisp.pl?gene=C2orf16">https://www.genecards.org/cgi-bin/carddisp.pl?gene=C2orf16</a>     |
| TEX36       | Testis Expressed 36                                              | Protein Coding | 29 | GC10M125576 | 2.88 <a href="https://www.genecards.org/cgi-bin/carddisp.pl?gene=TEX36">https://www.genecards.org/cgi-bin/carddisp.pl?gene=TEX36</a>         |
| PPIB        | Peptidylprolyl Isomerase B                                       | Protein Coding | 50 | GC15M064155 | 2.87 <a href="https://www.genecards.org/cgi-bin/carddisp.pl?gene=PPIB">https://www.genecards.org/cgi-bin/carddisp.pl?gene=PPIB</a>           |
| RPL7A       | Ribosomal Protein L7a                                            | Protein Coding | 42 | GC09P133348 | 2.87 <a href="https://www.genecards.org/cgi-bin/carddisp.pl?gene=RPL7A">https://www.genecards.org/cgi-bin/carddisp.pl?gene=RPL7A</a>         |
| SORCS3      | Sortilin Related VPS10 Domain Containing Receptor 3              | Protein Coding | 36 | GC10P104642 | 2.87 <a href="https://www.genecards.org/cgi-bin/carddisp.pl?gene=SORCS3">https://www.genecards.org/cgi-bin/carddisp.pl?gene=SORCS3</a>       |
| SORCS2      | Sortilin Related VPS10 Domain Containing Receptor 2              | Protein Coding | 36 | GC04P007196 | 2.87 <a href="https://www.genecards.org/cgi-bin/carddisp.pl?gene=SORCS2">https://www.genecards.org/cgi-bin/carddisp.pl?gene=SORCS2</a>       |
| ARL2BPP6    | ADP Ribosylation Factor Like GTPase 2 Binding Protein Pseudogene | Pseudogene     | 6  | GC05P175290 | 2.87 <a href="https://www.genecards.org/cgi-bin/carddisp.pl?gene=ARL2BPP6">https://www.genecards.org/cgi-bin/carddisp.pl?gene=ARL2BPP6</a>   |

|             |                                                     |                |    |             |      |                                                                                                                                         |
|-------------|-----------------------------------------------------|----------------|----|-------------|------|-----------------------------------------------------------------------------------------------------------------------------------------|
| ATAD3A      | ATPase Family AAA Domain Containing 3A              | Protein Coding | 39 | GC01P001570 | 2.85 | <a href="https://www.genecards.org/cgi-bin/carddisp.pl?gene=ATAD3A">https://www.genecards.org/cgi-bin/carddisp.pl?gene=ATAD3A</a>       |
| CAD         | Carbamoyl-Phosphate Synthetase 2, Aspartate Transca | Protein Coding | 50 | GC02P027217 | 2.84 | <a href="https://www.genecards.org/cgi-bin/carddisp.pl?gene=CAD">https://www.genecards.org/cgi-bin/carddisp.pl?gene=CAD</a>             |
| SLC30A6     | Solute Carrier Family 30 Member 6                   | Protein Coding | 38 | GC02P032166 | 2.84 | <a href="https://www.genecards.org/cgi-bin/carddisp.pl?gene=SLC30A6">https://www.genecards.org/cgi-bin/carddisp.pl?gene=SLC30A6</a>     |
| ADAMTS9-AS2 | ADAMTS9 Antisense RNA 2                             | RNA Gene       | 16 | GC03P064671 | 2.84 | <a href="https://www.genecards.org/cgi-bin/carddisp.pl?gene=ADAMTS9-A">https://www.genecards.org/cgi-bin/carddisp.pl?gene=ADAMTS9-A</a> |
| NDRG2       | NDRG Family Member 2                                | Protein Coding | 38 | GC14M021016 | 2.83 | <a href="https://www.genecards.org/cgi-bin/carddisp.pl?gene=NDRG2">https://www.genecards.org/cgi-bin/carddisp.pl?gene=NDRG2</a>         |
| VIL1        | Villin 1                                            | Protein Coding | 39 | GC02P218419 | 2.83 | <a href="https://www.genecards.org/cgi-bin/carddisp.pl?gene=VIL1">https://www.genecards.org/cgi-bin/carddisp.pl?gene=VIL1</a>           |
| DDX1        | DEAD-Box Helicase 1                                 | Protein Coding | 43 | GC02P015591 | 2.82 | <a href="https://www.genecards.org/cgi-bin/carddisp.pl?gene=DDX1">https://www.genecards.org/cgi-bin/carddisp.pl?gene=DDX1</a>           |
| NUCB2       | Nucleobindin 2                                      | Protein Coding | 38 | GC11P017221 | 2.82 | <a href="https://www.genecards.org/cgi-bin/carddisp.pl?gene=NUCB2">https://www.genecards.org/cgi-bin/carddisp.pl?gene=NUCB2</a>         |
| CHST2       | Carbohydrate Sulfotransferase 2                     | Protein Coding | 37 | GC03P143119 | 2.81 | <a href="https://www.genecards.org/cgi-bin/carddisp.pl?gene=CHST2">https://www.genecards.org/cgi-bin/carddisp.pl?gene=CHST2</a>         |
| GPT2        | Glutamic--Pyruvic Transaminase 2                    | Protein Coding | 46 | GC16P046885 | 2.8  | <a href="https://www.genecards.org/cgi-bin/carddisp.pl?gene=GPT2">https://www.genecards.org/cgi-bin/carddisp.pl?gene=GPT2</a>           |
| MCM7        | Minichromosome Maintenance Complex Component 7      | Protein Coding | 44 | GC07M100092 | 2.8  | <a href="https://www.genecards.org/cgi-bin/carddisp.pl?gene=MCM7">https://www.genecards.org/cgi-bin/carddisp.pl?gene=MCM7</a>           |
| NFE2        | Nuclear Factor, Erythroid 2                         | Protein Coding | 40 | GC12M054292 | 2.79 | <a href="https://www.genecards.org/cgi-bin/carddisp.pl?gene=NFE2">https://www.genecards.org/cgi-bin/carddisp.pl?gene=NFE2</a>           |
| MIR6090     | MicroRNA 6090                                       | RNA Gene       | 10 | GC11P128522 | 2.79 | <a href="https://www.genecards.org/cgi-bin/carddisp.pl?gene=MIR6090">https://www.genecards.org/cgi-bin/carddisp.pl?gene=MIR6090</a>     |
| APOF        | Apolipoprotein F                                    | Protein Coding | 37 | GC12M056361 | 2.78 | <a href="https://www.genecards.org/cgi-bin/carddisp.pl?gene=APOF">https://www.genecards.org/cgi-bin/carddisp.pl?gene=APOF</a>           |
| CCNC        | Cyclin C                                            | Protein Coding | 40 | GC06M099542 | 2.78 | <a href="https://www.genecards.org/cgi-bin/carddisp.pl?gene=CCNC">https://www.genecards.org/cgi-bin/carddisp.pl?gene=CCNC</a>           |
| MYO1B       | Myosin IB                                           | Protein Coding | 37 | GC02P191246 | 2.78 | <a href="https://www.genecards.org/cgi-bin/carddisp.pl?gene=MYO1B">https://www.genecards.org/cgi-bin/carddisp.pl?gene=MYO1B</a>         |
| PCBP1       | Poly(RC) Binding Protein 1                          | Protein Coding | 41 | GC02P070087 | 2.78 | <a href="https://www.genecards.org/cgi-bin/carddisp.pl?gene=PCBP1">https://www.genecards.org/cgi-bin/carddisp.pl?gene=PCBP1</a>         |
| FAM171A1    | Family With Sequence Similarity 171 Member A1       | Protein Coding | 33 | GC10M015254 | 2.78 | <a href="https://www.genecards.org/cgi-bin/carddisp.pl?gene=FAM171A1">https://www.genecards.org/cgi-bin/carddisp.pl?gene=FAM171A1</a>   |
| PTBP1       | Polypyrimidine Tract Binding Protein 1              | Protein Coding | 41 | GC19P000797 | 2.77 | <a href="https://www.genecards.org/cgi-bin/carddisp.pl?gene=PTBP1">https://www.genecards.org/cgi-bin/carddisp.pl?gene=PTBP1</a>         |
| LOC643339   | Uncharacterized LOC643339                           | RNA Gene       | 9  | GC12M093004 | 2.77 | <a href="https://www.genecards.org/cgi-bin/carddisp.pl?gene=LOC643339">https://www.genecards.org/cgi-bin/carddisp.pl?gene=LOC643339</a> |
| RPL12       | Ribosomal Protein L12                               | Protein Coding | 41 | GC09M127447 | 2.77 | <a href="https://www.genecards.org/cgi-bin/carddisp.pl?gene=RPL12">https://www.genecards.org/cgi-bin/carddisp.pl?gene=RPL12</a>         |
| NFE2L1      | Nuclear Factor, Erythroid 2 Like 1                  | Protein Coding | 43 | GC17P048049 | 2.75 | <a href="https://www.genecards.org/cgi-bin/carddisp.pl?gene=NFE2L1">https://www.genecards.org/cgi-bin/carddisp.pl?gene=NFE2L1</a>       |
| BBC3        | BCL2 Binding Component 3                            | Protein Coding | 41 | GC19M047220 | 2.74 | <a href="https://www.genecards.org/cgi-bin/carddisp.pl?gene=BBC3">https://www.genecards.org/cgi-bin/carddisp.pl?gene=BBC3</a>           |
| MYH10       | Myosin Heavy Chain 10                               | Protein Coding | 46 | GC17M008474 | 2.74 | <a href="https://www.genecards.org/cgi-bin/carddisp.pl?gene=MYH10">https://www.genecards.org/cgi-bin/carddisp.pl?gene=MYH10</a>         |
| FAM107B     | Family With Sequence Similarity 107 Member B        | Protein Coding | 35 | GC10M014519 | 2.73 | <a href="https://www.genecards.org/cgi-bin/carddisp.pl?gene=FAM107B">https://www.genecards.org/cgi-bin/carddisp.pl?gene=FAM107B</a>     |
| HSPH1       | Heat Shock Protein Family H (Hsp110) Member 1       | Protein Coding | 43 | GC13M031134 | 2.71 | <a href="https://www.genecards.org/cgi-bin/carddisp.pl?gene=HSPH1">https://www.genecards.org/cgi-bin/carddisp.pl?gene=HSPH1</a>         |
| IAH1        | Isoamyl Acetate Hydrolyzing Esterase 1 (Putative)   | Protein Coding | 33 | GC02P009473 | 2.71 | <a href="https://www.genecards.org/cgi-bin/carddisp.pl?gene=IAH1">https://www.genecards.org/cgi-bin/carddisp.pl?gene=IAH1</a>           |
| SFRP5       | Secreted Frizzled Related Protein 5                 | Protein Coding | 39 | GC10M097766 | 2.7  | <a href="https://www.genecards.org/cgi-bin/carddisp.pl?gene=SFRP5">https://www.genecards.org/cgi-bin/carddisp.pl?gene=SFRP5</a>         |
| RPL9        | Ribosomal Protein L9                                | Protein Coding | 41 | GC04M039452 | 2.69 | <a href="https://www.genecards.org/cgi-bin/carddisp.pl?gene=RPL9">https://www.genecards.org/cgi-bin/carddisp.pl?gene=RPL9</a>           |
| TRIB3       | Tribbles Pseudokinase 3                             | Protein Coding | 43 | GC20P000361 | 2.69 | <a href="https://www.genecards.org/cgi-bin/carddisp.pl?gene=TRIB3">https://www.genecards.org/cgi-bin/carddisp.pl?gene=TRIB3</a>         |
| COLGALT1    | Collagen Beta(1-O)Galactosyltransferase 1           | Protein Coding | 36 | GC19P017555 | 2.69 | <a href="https://www.genecards.org/cgi-bin/carddisp.pl?gene=COLGALT1">https://www.genecards.org/cgi-bin/carddisp.pl?gene=COLGALT1</a>   |
| RNU6-53P    | RNA, U6 Small Nuclear 53, Pseudogene                | Pseudogene     | 8  | GC13M028703 | 2.69 | <a href="https://www.genecards.org/cgi-bin/carddisp.pl?gene=RNU6-53P">https://www.genecards.org/cgi-bin/carddisp.pl?gene=RNU6-53P</a>   |
| MIR372      | MicroRNA 372                                        | RNA Gene       | 16 | GC19P054631 | 2.68 | <a href="https://www.genecards.org/cgi-bin/carddisp.pl?gene=MIR372">https://www.genecards.org/cgi-bin/carddisp.pl?gene=MIR372</a>       |
| RND3        | Rho Family GTPase 3                                 | Protein Coding | 41 | GC02M150468 | 2.68 | <a href="https://www.genecards.org/cgi-bin/carddisp.pl?gene=RND3">https://www.genecards.org/cgi-bin/carddisp.pl?gene=RND3</a>           |
| ARPC1B      | Actin Related Protein 2/3 Complex Subunit 1B        | Protein Coding | 43 | GC07P099374 | 2.68 | <a href="https://www.genecards.org/cgi-bin/carddisp.pl?gene=ARPC1B">https://www.genecards.org/cgi-bin/carddisp.pl?gene=ARPC1B</a>       |
| NCL         | Nucleolin                                           | Protein Coding | 42 | GC02M231453 | 2.67 | <a href="https://www.genecards.org/cgi-bin/carddisp.pl?gene=NCL">https://www.genecards.org/cgi-bin/carddisp.pl?gene=NCL</a>             |
| KCNK7       | Potassium Two Pore Domain Channel Subfamily K M     | Protein Coding | 37 | GC11M065592 | 2.67 | <a href="https://www.genecards.org/cgi-bin/carddisp.pl?gene=KCNK7">https://www.genecards.org/cgi-bin/carddisp.pl?gene=KCNK7</a>         |
| MACROH2A2   | MacroH2A.2 Histone                                  | Protein Coding | 29 | GC10P070053 | 2.67 | <a href="https://www.genecards.org/cgi-bin/carddisp.pl?gene=MACROH2A">https://www.genecards.org/cgi-bin/carddisp.pl?gene=MACROH2A</a>   |
| PCBP2       | Poly(RC) Binding Protein 2                          | Protein Coding | 41 | GC12P053452 | 2.67 | <a href="https://www.genecards.org/cgi-bin/carddisp.pl?gene=PCBP2">https://www.genecards.org/cgi-bin/carddisp.pl?gene=PCBP2</a>         |

|            |                                                            |                |    |             |      |                                                                                                                                           |
|------------|------------------------------------------------------------|----------------|----|-------------|------|-------------------------------------------------------------------------------------------------------------------------------------------|
| DDX5       | DEAD-Box Helicase 5                                        | Protein Coding | 46 | GC17M064498 | 2.66 | <a href="https://www.genecards.org/cgi-bin/carddisp.pl?gene=DDX5">https://www.genecards.org/cgi-bin/carddisp.pl?gene=DDX5</a>             |
| TMBIM1     | Transmembrane BAX Inhibitor Motif Containing 1             | Protein Coding | 35 | GC02M218274 | 2.66 | <a href="https://www.genecards.org/cgi-bin/carddisp.pl?gene=TMBIM1">https://www.genecards.org/cgi-bin/carddisp.pl?gene=TMBIM1</a>         |
| HNRNPM     | Heterogeneous Nuclear Ribonucleoprotein M                  | Protein Coding | 39 | GC19P008444 | 2.65 | <a href="https://www.genecards.org/cgi-bin/carddisp.pl?gene=HNRNPM">https://www.genecards.org/cgi-bin/carddisp.pl?gene=HNRNPM</a>         |
| DISC2      | Disrupted In Schizophrenia 2                               | RNA Gene       | 18 | GC01M231814 | 2.65 | <a href="https://www.genecards.org/cgi-bin/carddisp.pl?gene=DISC2">https://www.genecards.org/cgi-bin/carddisp.pl?gene=DISC2</a>           |
| SDK1       | Sidekick Cell Adhesion Molecule 1                          | Protein Coding | 36 | GC07P003307 | 2.64 | <a href="https://www.genecards.org/cgi-bin/carddisp.pl?gene=SDK1">https://www.genecards.org/cgi-bin/carddisp.pl?gene=SDK1</a>             |
| SLC9A4     | Solute Carrier Family 9 Member A4                          | Protein Coding | 36 | GC02P102456 | 2.64 | <a href="https://www.genecards.org/cgi-bin/carddisp.pl?gene=SLC9A4">https://www.genecards.org/cgi-bin/carddisp.pl?gene=SLC9A4</a>         |
| ATXN2L     | Ataxin 2 Like                                              | Protein Coding | 37 | GC16P029016 | 2.63 | <a href="https://www.genecards.org/cgi-bin/carddisp.pl?gene=ATXN2L">https://www.genecards.org/cgi-bin/carddisp.pl?gene=ATXN2L</a>         |
| PPP1CA     | Protein Phosphatase 1 Catalytic Subunit Alpha              | Protein Coding | 48 | GC11M067415 | 2.63 | <a href="https://www.genecards.org/cgi-bin/carddisp.pl?gene=PPP1CA">https://www.genecards.org/cgi-bin/carddisp.pl?gene=PPP1CA</a>         |
| PFKFB3     | 6-Phosphofructo-2-Kinase/Fructose-2,6-Biphosphatase        | Protein Coding | 44 | GC10P006144 | 2.62 | <a href="https://www.genecards.org/cgi-bin/carddisp.pl?gene=PFKFB3">https://www.genecards.org/cgi-bin/carddisp.pl?gene=PFKFB3</a>         |
| POLR3H     | RNA Polymerase III Subunit H                               | Protein Coding | 37 | GC22M041525 | 2.62 | <a href="https://www.genecards.org/cgi-bin/carddisp.pl?gene=POLR3H">https://www.genecards.org/cgi-bin/carddisp.pl?gene=POLR3H</a>         |
| ETS1-AS1   | ETS1 Antisense RNA 1                                       | RNA Gene       | 11 | GC11P128527 | 2.62 | <a href="https://www.genecards.org/cgi-bin/carddisp.pl?gene=ETS1-AS1">https://www.genecards.org/cgi-bin/carddisp.pl?gene=ETS1-AS1</a>     |
| RPL27      | Ribosomal Protein L27                                      | Protein Coding | 42 | GC17P042998 | 2.62 | <a href="https://www.genecards.org/cgi-bin/carddisp.pl?gene=RPL27">https://www.genecards.org/cgi-bin/carddisp.pl?gene=RPL27</a>           |
| APPL2      | Adaptor Protein, Phosphotyrosine Interacting With PH       | Protein Coding | 35 | GC12M105173 | 2.61 | <a href="https://www.genecards.org/cgi-bin/carddisp.pl?gene=APPL2">https://www.genecards.org/cgi-bin/carddisp.pl?gene=APPL2</a>           |
| L13304-005 |                                                            | RNA Gene       | 4  | GC11M065320 | 2.61 | <a href="https://www.genecards.org/cgi-bin/carddisp.pl?gene=L13304-005">https://www.genecards.org/cgi-bin/carddisp.pl?gene=L13304-005</a> |
| KLHL6      | Kelch Like Family Member 6                                 | Protein Coding | 37 | GC03M183487 | 2.6  | <a href="https://www.genecards.org/cgi-bin/carddisp.pl?gene=KLHL6">https://www.genecards.org/cgi-bin/carddisp.pl?gene=KLHL6</a>           |
| PSG1       | Pregnancy Specific Beta-1-Glycoprotein 1                   | Protein Coding | 39 | GC19M042866 | 2.59 | <a href="https://www.genecards.org/cgi-bin/carddisp.pl?gene=PSG1">https://www.genecards.org/cgi-bin/carddisp.pl?gene=PSG1</a>             |
| NRG4       | Neuregulin 4                                               | Protein Coding | 39 | GC15M075935 | 2.59 | <a href="https://www.genecards.org/cgi-bin/carddisp.pl?gene=NRG4">https://www.genecards.org/cgi-bin/carddisp.pl?gene=NRG4</a>             |
| GRM4       | Glutamate Metabotropic Receptor 4                          | Protein Coding | 44 | GC06M042205 | 2.58 | <a href="https://www.genecards.org/cgi-bin/carddisp.pl?gene=GRM4">https://www.genecards.org/cgi-bin/carddisp.pl?gene=GRM4</a>             |
| RPL30      | Ribosomal Protein L30                                      | Protein Coding | 40 | GC08M098024 | 2.58 | <a href="https://www.genecards.org/cgi-bin/carddisp.pl?gene=RPL30">https://www.genecards.org/cgi-bin/carddisp.pl?gene=RPL30</a>           |
| SMIM20     | Small Integral Membrane Protein 20                         | Protein Coding | 29 | GC04P025865 | 2.58 | <a href="https://www.genecards.org/cgi-bin/carddisp.pl?gene=SMIM20">https://www.genecards.org/cgi-bin/carddisp.pl?gene=SMIM20</a>         |
| HNRNPC     | Heterogeneous Nuclear Ribonucleoprotein C                  | Protein Coding | 41 | GC14M021210 | 2.57 | <a href="https://www.genecards.org/cgi-bin/carddisp.pl?gene=HNRNPC">https://www.genecards.org/cgi-bin/carddisp.pl?gene=HNRNPC</a>         |
| MYO18A     | Myosin XVIII A                                             | Protein Coding | 37 | GC17M029968 | 2.57 | <a href="https://www.genecards.org/cgi-bin/carddisp.pl?gene=MYO18A">https://www.genecards.org/cgi-bin/carddisp.pl?gene=MYO18A</a>         |
| SEN3       | SUMO Specific Peptidase 3                                  | Protein Coding | 40 | GC17P008040 | 2.56 | <a href="https://www.genecards.org/cgi-bin/carddisp.pl?gene=SEN3">https://www.genecards.org/cgi-bin/carddisp.pl?gene=SEN3</a>             |
| CTSS       | Cathepsin S                                                | Protein Coding | 45 | GC01M150730 | 2.56 | <a href="https://www.genecards.org/cgi-bin/carddisp.pl?gene=CTSS">https://www.genecards.org/cgi-bin/carddisp.pl?gene=CTSS</a>             |
| KRTAP5-5   | Keratin Associated Protein 5-5                             | Protein Coding | 27 | GC11P001629 | 2.56 | <a href="https://www.genecards.org/cgi-bin/carddisp.pl?gene=KRTAP5-5">https://www.genecards.org/cgi-bin/carddisp.pl?gene=KRTAP5-5</a>     |
| CNOT4      | CCR4-NOT Transcription Complex Subunit 4                   | Protein Coding | 40 | GC07M135361 | 2.55 | <a href="https://www.genecards.org/cgi-bin/carddisp.pl?gene=CNOT4">https://www.genecards.org/cgi-bin/carddisp.pl?gene=CNOT4</a>           |
| KIF16B     | Kinesin Family Member 16B                                  | Protein Coding | 37 | GC20M016272 | 2.54 | <a href="https://www.genecards.org/cgi-bin/carddisp.pl?gene=KIF16B">https://www.genecards.org/cgi-bin/carddisp.pl?gene=KIF16B</a>         |
| RPS4X      | Ribosomal Protein S4 X-Linked                              | Protein Coding | 39 | GC0XM072255 | 2.54 | <a href="https://www.genecards.org/cgi-bin/carddisp.pl?gene=RPS4X">https://www.genecards.org/cgi-bin/carddisp.pl?gene=RPS4X</a>           |
| FOXN3      | Forkhead Box N3                                            | Protein Coding | 38 | GC14M094049 | 2.54 | <a href="https://www.genecards.org/cgi-bin/carddisp.pl?gene=FOXN3">https://www.genecards.org/cgi-bin/carddisp.pl?gene=FOXN3</a>           |
| SERPINA4   | Serpin Family A Member 4                                   | Protein Coding | 41 | GC14P094561 | 2.54 | <a href="https://www.genecards.org/cgi-bin/carddisp.pl?gene=SERPINA4">https://www.genecards.org/cgi-bin/carddisp.pl?gene=SERPINA4</a>     |
| AGR3       | Anterior Gradient 3, Protein Disulphide Isomerase Family A | Protein Coding | 37 | GC07M016854 | 2.53 | <a href="https://www.genecards.org/cgi-bin/carddisp.pl?gene=AGR3">https://www.genecards.org/cgi-bin/carddisp.pl?gene=AGR3</a>             |
| GGT3P      | Gamma-Glutamyltransferase 3 Pseudogene                     | Pseudogene     | 18 | GC22M018773 | 2.52 | <a href="https://www.genecards.org/cgi-bin/carddisp.pl?gene=GGT3P">https://www.genecards.org/cgi-bin/carddisp.pl?gene=GGT3P</a>           |
| MYL6B      | Myosin Light Chain 6B                                      | Protein Coding | 39 | GC12P056201 | 2.52 | <a href="https://www.genecards.org/cgi-bin/carddisp.pl?gene=MYL6B">https://www.genecards.org/cgi-bin/carddisp.pl?gene=MYL6B</a>           |
| POLR2D     | RNA Polymerase II Subunit D                                | Protein Coding | 41 | GC02M127981 | 2.52 | <a href="https://www.genecards.org/cgi-bin/carddisp.pl?gene=POLR2D">https://www.genecards.org/cgi-bin/carddisp.pl?gene=POLR2D</a>         |
| WWTR1      | WW Domain Containing Transcription Regulator 1             | Protein Coding | 41 | GC03M149517 | 2.52 | <a href="https://www.genecards.org/cgi-bin/carddisp.pl?gene=WWTR1">https://www.genecards.org/cgi-bin/carddisp.pl?gene=WWTR1</a>           |
| PDE7B      | Phosphodiesterase 7B                                       | Protein Coding | 39 | GC06P135795 | 2.51 | <a href="https://www.genecards.org/cgi-bin/carddisp.pl?gene=PDE7B">https://www.genecards.org/cgi-bin/carddisp.pl?gene=PDE7B</a>           |
| DDX60      | DEAD/H-Box Helicase 60                                     | Protein Coding | 35 | GC04M168216 | 2.51 | <a href="https://www.genecards.org/cgi-bin/carddisp.pl?gene=DDX60">https://www.genecards.org/cgi-bin/carddisp.pl?gene=DDX60</a>           |
| DDX50      | DEAD-Box Helicase 50                                       | Protein Coding | 39 | GC10P068901 | 2.51 | <a href="https://www.genecards.org/cgi-bin/carddisp.pl?gene=DDX50">https://www.genecards.org/cgi-bin/carddisp.pl?gene=DDX50</a>           |
| SLC6A9     | Solute Carrier Family 6 Member 9                           | Protein Coding | 48 | GC01M043991 | 2.51 | <a href="https://www.genecards.org/cgi-bin/carddisp.pl?gene=SLC6A9">https://www.genecards.org/cgi-bin/carddisp.pl?gene=SLC6A9</a>         |

|                 |                                                     |                |    |             |      |                                                                                                                                                     |
|-----------------|-----------------------------------------------------|----------------|----|-------------|------|-----------------------------------------------------------------------------------------------------------------------------------------------------|
| piR-37045       |                                                     | RNA Gene       | 2  | GC22P044002 | 2.5  | <a href="https://www.genecards.org/cgi-bin/carddisp.pl?gene=piR-37045">https://www.genecards.org/cgi-bin/carddisp.pl?gene=piR-37045</a>             |
| lnc-PNPLA5-2    |                                                     | RNA Gene       | 2  | GC22M045578 | 2.5  | <a href="https://www.genecards.org/cgi-bin/carddisp.pl?gene=lnc-PNPLA5-2">https://www.genecards.org/cgi-bin/carddisp.pl?gene=lnc-PNPLA5-2</a>       |
| APLNR           | Apelin Receptor                                     | Protein Coding | 43 | GC11M057233 | 2.49 | <a href="https://www.genecards.org/cgi-bin/carddisp.pl?gene=APLNR">https://www.genecards.org/cgi-bin/carddisp.pl?gene=APLNR</a>                     |
| RUVBL2          | RuvB Like AAA ATPase 2                              | Protein Coding | 44 | GC19P048993 | 2.49 | <a href="https://www.genecards.org/cgi-bin/carddisp.pl?gene=RUVBL2">https://www.genecards.org/cgi-bin/carddisp.pl?gene=RUVBL2</a>                   |
| C1QTNF3         | C1q And TNF Related 3                               | Protein Coding | 38 | GC05M034017 | 2.47 | <a href="https://www.genecards.org/cgi-bin/carddisp.pl?gene=C1QTNF3">https://www.genecards.org/cgi-bin/carddisp.pl?gene=C1QTNF3</a>                 |
| AP2B1           | Adaptor Related Protein Complex 2 Subunit Beta 1    | Protein Coding | 42 | GC17P035578 | 2.47 | <a href="https://www.genecards.org/cgi-bin/carddisp.pl?gene=AP2B1">https://www.genecards.org/cgi-bin/carddisp.pl?gene=AP2B1</a>                     |
| ENSG00000253111 |                                                     | RNA Gene       | 7  | GC08P125466 | 2.47 | <a href="https://www.genecards.org/cgi-bin/carddisp.pl?gene=ENSG00000253111">https://www.genecards.org/cgi-bin/carddisp.pl?gene=ENSG00000253111</a> |
| LINC02694       | Long Intergenic Non-Protein Coding RNA 2694         | RNA Gene       | 24 | GC15P038630 | 2.46 | <a href="https://www.genecards.org/cgi-bin/carddisp.pl?gene=LINC02694">https://www.genecards.org/cgi-bin/carddisp.pl?gene=LINC02694</a>             |
| MCM3            | Minichromosome Maintenance Complex Component 3      | Protein Coding | 45 | GC06M052264 | 2.46 | <a href="https://www.genecards.org/cgi-bin/carddisp.pl?gene=MCM3">https://www.genecards.org/cgi-bin/carddisp.pl?gene=MCM3</a>                       |
| GCN1            | GCN1 Activator Of EIF2AK4                           | Protein Coding | 28 | GC12M120128 | 2.46 | <a href="https://www.genecards.org/cgi-bin/carddisp.pl?gene=GCN1">https://www.genecards.org/cgi-bin/carddisp.pl?gene=GCN1</a>                       |
| MRTFA           | Myocardin Related Transcription Factor A            | Protein Coding | 34 | GC22M045655 | 2.45 | <a href="https://www.genecards.org/cgi-bin/carddisp.pl?gene=MRTFA">https://www.genecards.org/cgi-bin/carddisp.pl?gene=MRTFA</a>                     |
| SIRT7           | Sirtuin 7                                           | Protein Coding | 41 | GC17M081911 | 2.45 | <a href="https://www.genecards.org/cgi-bin/carddisp.pl?gene=SIRT7">https://www.genecards.org/cgi-bin/carddisp.pl?gene=SIRT7</a>                     |
| YWHAB           | Tyrosine 3-Monooxygenase/Tryptophan 5-Monooxygenase | Protein Coding | 48 | GC20P044885 | 2.45 | <a href="https://www.genecards.org/cgi-bin/carddisp.pl?gene=YWHAB">https://www.genecards.org/cgi-bin/carddisp.pl?gene=YWHAB</a>                     |
| TUBA1C          | Tubulin Alpha 1c                                    | Protein Coding | 41 | GC12P049188 | 2.45 | <a href="https://www.genecards.org/cgi-bin/carddisp.pl?gene=TUBA1C">https://www.genecards.org/cgi-bin/carddisp.pl?gene=TUBA1C</a>                   |
| ONECUT2         | One Cut Homeobox 2                                  | Protein Coding | 35 | GC18P057436 | 2.45 | <a href="https://www.genecards.org/cgi-bin/carddisp.pl?gene=ONECUT2">https://www.genecards.org/cgi-bin/carddisp.pl?gene=ONECUT2</a>                 |
| GATAD2A         | GATA Zinc Finger Domain Containing 2A               | Protein Coding | 37 | GC19P023337 | 2.45 | <a href="https://www.genecards.org/cgi-bin/carddisp.pl?gene=GATAD2A">https://www.genecards.org/cgi-bin/carddisp.pl?gene=GATAD2A</a>                 |
| SRSF6           | Serine And Arginine Rich Splicing Factor 6          | Protein Coding | 39 | GC20P043457 | 2.44 | <a href="https://www.genecards.org/cgi-bin/carddisp.pl?gene=SRSF6">https://www.genecards.org/cgi-bin/carddisp.pl?gene=SRSF6</a>                     |
| PWWP3A          | PWWP Domain Containing 3A, DNA Repair Factor        | Protein Coding | 20 | GC19P001364 | 2.44 | <a href="https://www.genecards.org/cgi-bin/carddisp.pl?gene=PWWP3A">https://www.genecards.org/cgi-bin/carddisp.pl?gene=PWWP3A</a>                   |
| MCM5            | Minichromosome Maintenance Complex Component 5      | Protein Coding | 44 | GC22P035400 | 2.44 | <a href="https://www.genecards.org/cgi-bin/carddisp.pl?gene=MCM5">https://www.genecards.org/cgi-bin/carddisp.pl?gene=MCM5</a>                       |
| WSPAR           | WNT Signaling Pathway Activating Non-Coding RNA     | RNA Gene       | 11 | GC05P133914 | 2.43 | <a href="https://www.genecards.org/cgi-bin/carddisp.pl?gene=WSPAR">https://www.genecards.org/cgi-bin/carddisp.pl?gene=WSPAR</a>                     |
| ATP5F1B         | ATP Synthase F1 Subunit Beta                        | Protein Coding | 33 | GC12M056639 | 2.43 | <a href="https://www.genecards.org/cgi-bin/carddisp.pl?gene=ATP5F1B">https://www.genecards.org/cgi-bin/carddisp.pl?gene=ATP5F1B</a>                 |
| RPL13           | Ribosomal Protein L13                               | Protein Coding | 41 | GC16P089640 | 2.43 | <a href="https://www.genecards.org/cgi-bin/carddisp.pl?gene=RPL13">https://www.genecards.org/cgi-bin/carddisp.pl?gene=RPL13</a>                     |
| CLRN1-AS1       | CLRN1 Antisense RNA 1                               | RNA Gene       | 16 | GC03P150852 | 2.42 | <a href="https://www.genecards.org/cgi-bin/carddisp.pl?gene=CLRN1-AS1">https://www.genecards.org/cgi-bin/carddisp.pl?gene=CLRN1-AS1</a>             |
| GSDMD           | Gasdermin D                                         | Protein Coding | 39 | GC08P143553 | 2.41 | <a href="https://www.genecards.org/cgi-bin/carddisp.pl?gene=GSDMD">https://www.genecards.org/cgi-bin/carddisp.pl?gene=GSDMD</a>                     |
| CCT3            | Chaperonin Containing TCP1 Subunit 3                | Protein Coding | 41 | GC01M156308 | 2.41 | <a href="https://www.genecards.org/cgi-bin/carddisp.pl?gene=CCT3">https://www.genecards.org/cgi-bin/carddisp.pl?gene=CCT3</a>                       |
| H1-4            | H1.4 Linker Histone, Cluster Member                 | Protein Coding | 33 | GC06P028871 | 2.41 | <a href="https://www.genecards.org/cgi-bin/carddisp.pl?gene=H1-4">https://www.genecards.org/cgi-bin/carddisp.pl?gene=H1-4</a>                       |
| MCF2L2          | MCF.2 Cell Line Derived Transforming Sequence-Like  | Protein Coding | 34 | GC03M183183 | 2.4  | <a href="https://www.genecards.org/cgi-bin/carddisp.pl?gene=MCF2L2">https://www.genecards.org/cgi-bin/carddisp.pl?gene=MCF2L2</a>                   |
| RPS2            | Ribosomal Protein S2                                | Protein Coding | 43 | GC16M002198 | 2.4  | <a href="https://www.genecards.org/cgi-bin/carddisp.pl?gene=RPS2">https://www.genecards.org/cgi-bin/carddisp.pl?gene=RPS2</a>                       |
| TMOD3           | Tropomodulin 3                                      | Protein Coding | 39 | GC15P051829 | 2.4  | <a href="https://www.genecards.org/cgi-bin/carddisp.pl?gene=TMOD3">https://www.genecards.org/cgi-bin/carddisp.pl?gene=TMOD3</a>                     |
| RPLP2           | Ribosomal Protein Lateral Stalk Subunit P2          | Protein Coding | 41 | GC11P000891 | 2.4  | <a href="https://www.genecards.org/cgi-bin/carddisp.pl?gene=RPLP2">https://www.genecards.org/cgi-bin/carddisp.pl?gene=RPLP2</a>                     |
| MYO1C           | Myosin IC                                           | Protein Coding | 43 | GC17M001464 | 2.4  | <a href="https://www.genecards.org/cgi-bin/carddisp.pl?gene=MYO1C">https://www.genecards.org/cgi-bin/carddisp.pl?gene=MYO1C</a>                     |
| SNHG18          | Small Nucleolar RNA Host Gene 18                    | RNA Gene       | 14 | GC05P009562 | 2.4  | <a href="https://www.genecards.org/cgi-bin/carddisp.pl?gene=SNHG18">https://www.genecards.org/cgi-bin/carddisp.pl?gene=SNHG18</a>                   |
| NUDT4           | Nudix Hydrolase 4                                   | Protein Coding | 39 | GC12P093392 | 2.39 | <a href="https://www.genecards.org/cgi-bin/carddisp.pl?gene=NUDT4">https://www.genecards.org/cgi-bin/carddisp.pl?gene=NUDT4</a>                     |
| IGF2BP1         | Insulin Like Growth Factor 2 mRNA Binding Protein 1 | Protein Coding | 40 | GC17P048997 | 2.39 | <a href="https://www.genecards.org/cgi-bin/carddisp.pl?gene=IGF2BP1">https://www.genecards.org/cgi-bin/carddisp.pl?gene=IGF2BP1</a>                 |
| ACTR5           | Actin Related Protein 5                             | Protein Coding | 35 | GC20P038748 | 2.39 | <a href="https://www.genecards.org/cgi-bin/carddisp.pl?gene=ACTR5">https://www.genecards.org/cgi-bin/carddisp.pl?gene=ACTR5</a>                     |
| YWHAZ           | Tyrosine 3-Monooxygenase/Tryptophan 5-Monooxygenase | Protein Coding | 48 | GC08M100917 | 2.38 | <a href="https://www.genecards.org/cgi-bin/carddisp.pl?gene=YWHAZ">https://www.genecards.org/cgi-bin/carddisp.pl?gene=YWHAZ</a>                     |
| TSNAX-DISC1     | TSNAX-DISC1 Readthrough (NMD Candidate)             | RNA Gene       | 19 | GC01P231528 | 2.38 | <a href="https://www.genecards.org/cgi-bin/carddisp.pl?gene=TSNAX-DISC1">https://www.genecards.org/cgi-bin/carddisp.pl?gene=TSNAX-DISC1</a>         |
| CCT2            | Chaperonin Containing TCP1 Subunit 2                | Protein Coding | 40 | GC12P069585 | 2.38 | <a href="https://www.genecards.org/cgi-bin/carddisp.pl?gene=CCT2">https://www.genecards.org/cgi-bin/carddisp.pl?gene=CCT2</a>                       |
| SLC25A10        | Solute Carrier Family 25 Member 10                  | Protein Coding | 42 | GC17P081712 | 2.38 | <a href="https://www.genecards.org/cgi-bin/carddisp.pl?gene=SLC25A10">https://www.genecards.org/cgi-bin/carddisp.pl?gene=SLC25A10</a>               |



|                 |                                                      |                |    |             |      |                                                                                                                                                     |
|-----------------|------------------------------------------------------|----------------|----|-------------|------|-----------------------------------------------------------------------------------------------------------------------------------------------------|
| RPS15A          | Ribosomal Protein S15a                               | Protein Coding | 41 | GC16M018781 | 2.38 | <a href="https://www.genecards.org/cgi-bin/carddisp.pl?gene=RPS15A">https://www.genecards.org/cgi-bin/carddisp.pl?gene=RPS15A</a>                   |
| lnc-PUM2-3      |                                                      | RNA Gene       | 4  | GC02M020202 | 2.38 | <a href="https://www.genecards.org/cgi-bin/carddisp.pl?gene=lnc-PUM2-3">https://www.genecards.org/cgi-bin/carddisp.pl?gene=lnc-PUM2-3</a>           |
| lnc-RHOB-11     |                                                      | RNA Gene       | 4  | GC02P020182 | 2.38 | <a href="https://www.genecards.org/cgi-bin/carddisp.pl?gene=lnc-RHOB-11">https://www.genecards.org/cgi-bin/carddisp.pl?gene=lnc-RHOB-11</a>         |
| RPS23           | Ribosomal Protein S23                                | Protein Coding | 40 | GC05M082273 | 2.38 | <a href="https://www.genecards.org/cgi-bin/carddisp.pl?gene=RPS23">https://www.genecards.org/cgi-bin/carddisp.pl?gene=RPS23</a>                     |
| CILP2           | Cartilage Intermediate Layer Protein 2               | Protein Coding | 35 | GC19P019538 | 2.37 | <a href="https://www.genecards.org/cgi-bin/carddisp.pl?gene=CILP2">https://www.genecards.org/cgi-bin/carddisp.pl?gene=CILP2</a>                     |
| LINC01679       | Long Intergenic Non-Protein Coding RNA 1679          | RNA Gene       | 9  | GC21M043360 | 2.37 | <a href="https://www.genecards.org/cgi-bin/carddisp.pl?gene=LINC01679">https://www.genecards.org/cgi-bin/carddisp.pl?gene=LINC01679</a>             |
| RPS11           | Ribosomal Protein S11                                | Protein Coding | 39 | GC19P049496 | 2.37 | <a href="https://www.genecards.org/cgi-bin/carddisp.pl?gene=RPS11">https://www.genecards.org/cgi-bin/carddisp.pl?gene=RPS11</a>                     |
| RESF1           | Retroelement Silencing Factor 1                      | Protein Coding | 25 | GC12P031982 | 2.37 | <a href="https://www.genecards.org/cgi-bin/carddisp.pl?gene=RESF1">https://www.genecards.org/cgi-bin/carddisp.pl?gene=RESF1</a>                     |
| C16orf95        | Chromosome 16 Open Reading Frame 95                  | Protein Coding | 26 | GC16M087119 | 2.37 | <a href="https://www.genecards.org/cgi-bin/carddisp.pl?gene=C16orf95">https://www.genecards.org/cgi-bin/carddisp.pl?gene=C16orf95</a>               |
| IP6K3           | Inositol Hexakisphosphate Kinase 3                   | Protein Coding | 39 | GC06M033721 | 2.36 | <a href="https://www.genecards.org/cgi-bin/carddisp.pl?gene=IP6K3">https://www.genecards.org/cgi-bin/carddisp.pl?gene=IP6K3</a>                     |
| MIR1296         | MicroRNA 1296                                        | RNA Gene       | 16 | GC10M063372 | 2.36 | <a href="https://www.genecards.org/cgi-bin/carddisp.pl?gene=MIR1296">https://www.genecards.org/cgi-bin/carddisp.pl?gene=MIR1296</a>                 |
| XPO4            | Exportin 4                                           | Protein Coding | 37 | GC13M020777 | 2.36 | <a href="https://www.genecards.org/cgi-bin/carddisp.pl?gene=XPO4">https://www.genecards.org/cgi-bin/carddisp.pl?gene=XPO4</a>                       |
| ENSG00000287092 |                                                      | RNA Gene       | 5  | GC06M155911 | 2.35 | <a href="https://www.genecards.org/cgi-bin/carddisp.pl?gene=ENSG00000287092">https://www.genecards.org/cgi-bin/carddisp.pl?gene=ENSG00000287092</a> |
| LINC00917       | Long Intergenic Non-Protein Coding RNA 917           | RNA Gene       | 14 | GC16M086366 | 2.35 | <a href="https://www.genecards.org/cgi-bin/carddisp.pl?gene=LINC00917">https://www.genecards.org/cgi-bin/carddisp.pl?gene=LINC00917</a>             |
| LINC00322       | Long Intergenic Non-Protein Coding RNA 322           | RNA Gene       | 17 | GC21M043322 | 2.34 | <a href="https://www.genecards.org/cgi-bin/carddisp.pl?gene=LINC00322">https://www.genecards.org/cgi-bin/carddisp.pl?gene=LINC00322</a>             |
| RPL10A          | Ribosomal Protein L10a                               | Protein Coding | 41 | GC06P047437 | 2.34 | <a href="https://www.genecards.org/cgi-bin/carddisp.pl?gene=RPL10A">https://www.genecards.org/cgi-bin/carddisp.pl?gene=RPL10A</a>                   |
| DNAJA1          | DnaJ Heat Shock Protein Family (Hsp40) Member A1     | Protein Coding | 41 | GC09P033025 | 2.34 | <a href="https://www.genecards.org/cgi-bin/carddisp.pl?gene=DNAJA1">https://www.genecards.org/cgi-bin/carddisp.pl?gene=DNAJA1</a>                   |
| SAT1            | Spermidine/Spermine N1-Acetyltransferase 1           | Protein Coding | 45 | GC0XP023784 | 2.34 | <a href="https://www.genecards.org/cgi-bin/carddisp.pl?gene=SAT1">https://www.genecards.org/cgi-bin/carddisp.pl?gene=SAT1</a>                       |
| ZNF101          | Zinc Finger Protein 101                              | Protein Coding | 34 | GC19P023339 | 2.33 | <a href="https://www.genecards.org/cgi-bin/carddisp.pl?gene=ZNF101">https://www.genecards.org/cgi-bin/carddisp.pl?gene=ZNF101</a>                   |
| QARS1           | Glutamyl-tRNA Synthetase 1                           | Protein Coding | 26 | GC03M049240 | 2.33 | <a href="https://www.genecards.org/cgi-bin/carddisp.pl?gene=QARS1">https://www.genecards.org/cgi-bin/carddisp.pl?gene=QARS1</a>                     |
| TCP1            | T-Complex 1                                          | Protein Coding | 41 | GC06M159778 | 2.33 | <a href="https://www.genecards.org/cgi-bin/carddisp.pl?gene=TCP1">https://www.genecards.org/cgi-bin/carddisp.pl?gene=TCP1</a>                       |
| SLC30A9         | Solute Carrier Family 30 Member 9                    | Protein Coding | 41 | GC04P041992 | 2.33 | <a href="https://www.genecards.org/cgi-bin/carddisp.pl?gene=SLC30A9">https://www.genecards.org/cgi-bin/carddisp.pl?gene=SLC30A9</a>                 |
| GRIK3           | Glutamate Ionotropic Receptor Kainate Type Subunit 3 | Protein Coding | 43 | GC01M036795 | 2.32 | <a href="https://www.genecards.org/cgi-bin/carddisp.pl?gene=GRIK3">https://www.genecards.org/cgi-bin/carddisp.pl?gene=GRIK3</a>                     |
| SP4             | Sp4 Transcription Factor                             | Protein Coding | 41 | GC07P021434 | 2.32 | <a href="https://www.genecards.org/cgi-bin/carddisp.pl?gene=SP4">https://www.genecards.org/cgi-bin/carddisp.pl?gene=SP4</a>                         |
| ENSG00000254599 |                                                      | RNA Gene       | 5  | GC11P098676 | 2.32 | <a href="https://www.genecards.org/cgi-bin/carddisp.pl?gene=ENSG00000254599">https://www.genecards.org/cgi-bin/carddisp.pl?gene=ENSG00000254599</a> |
| lnc-CRYAA-1     |                                                      | RNA Gene       | 4  | GC21P043356 | 2.32 | <a href="https://www.genecards.org/cgi-bin/carddisp.pl?gene=lnc-CRYAA-1">https://www.genecards.org/cgi-bin/carddisp.pl?gene=lnc-CRYAA-1</a>         |
| lnc-JCAD-2      |                                                      | RNA Gene       | 4  | GC10M030507 | 2.32 | <a href="https://www.genecards.org/cgi-bin/carddisp.pl?gene=lnc-JCAD-2">https://www.genecards.org/cgi-bin/carddisp.pl?gene=lnc-JCAD-2</a>           |
| lnc-CRYAA-17    |                                                      | RNA Gene       | 3  | GC21P043341 | 2.32 | <a href="https://www.genecards.org/cgi-bin/carddisp.pl?gene=lnc-CRYAA-17">https://www.genecards.org/cgi-bin/carddisp.pl?gene=lnc-CRYAA-17</a>       |
| ENSG00000226026 |                                                      | Uncategorized  | 8  | GC01M095162 | 2.32 | <a href="https://www.genecards.org/cgi-bin/carddisp.pl?gene=ENSG00000226026">https://www.genecards.org/cgi-bin/carddisp.pl?gene=ENSG00000226026</a> |
| RPL4            | Ribosomal Protein L4                                 | Protein Coding | 41 | GC15M066498 | 2.31 | <a href="https://www.genecards.org/cgi-bin/carddisp.pl?gene=RPL4">https://www.genecards.org/cgi-bin/carddisp.pl?gene=RPL4</a>                       |
| NUDT21          | Nudix Hydrolase 21                                   | Protein Coding | 37 | GC16M056429 | 2.3  | <a href="https://www.genecards.org/cgi-bin/carddisp.pl?gene=NUDT21">https://www.genecards.org/cgi-bin/carddisp.pl?gene=NUDT21</a>                   |
| MYO1D           | Myosin ID                                            | Protein Coding | 40 | GC17M032492 | 2.3  | <a href="https://www.genecards.org/cgi-bin/carddisp.pl?gene=MYO1D">https://www.genecards.org/cgi-bin/carddisp.pl?gene=MYO1D</a>                     |
| STRA8           | Stimulated By Retinoic Acid 8                        | Protein Coding | 35 | GC07P135231 | 2.3  | <a href="https://www.genecards.org/cgi-bin/carddisp.pl?gene=STRA8">https://www.genecards.org/cgi-bin/carddisp.pl?gene=STRA8</a>                     |
| MIR646HG        | MIR646 Host Gene                                     | RNA Gene       | 14 | GC20P060088 | 2.3  | <a href="https://www.genecards.org/cgi-bin/carddisp.pl?gene=MIR646HG">https://www.genecards.org/cgi-bin/carddisp.pl?gene=MIR646HG</a>               |
| ENSG00000231487 |                                                      | RNA Gene       | 6  | GC11M001683 | 2.3  | <a href="https://www.genecards.org/cgi-bin/carddisp.pl?gene=ENSG00000231487">https://www.genecards.org/cgi-bin/carddisp.pl?gene=ENSG00000231487</a> |
| PLPP7           | Phospholipid Phosphatase 7 (Inactive)                | Protein Coding | 28 | GC09P131290 | 2.3  | <a href="https://www.genecards.org/cgi-bin/carddisp.pl?gene=PLPP7">https://www.genecards.org/cgi-bin/carddisp.pl?gene=PLPP7</a>                     |
| A2MP1           | Alpha-2-Macroglobulin Pseudogene 1                   | Pseudogene     | 12 | GC12M009228 | 2.29 | <a href="https://www.genecards.org/cgi-bin/carddisp.pl?gene=A2MP1">https://www.genecards.org/cgi-bin/carddisp.pl?gene=A2MP1</a>                     |
| EIF3L           | Eukaryotic Translation Initiation Factor 3 Subunit L | Protein Coding | 37 | GC22P037848 | 2.29 | <a href="https://www.genecards.org/cgi-bin/carddisp.pl?gene=EIF3L">https://www.genecards.org/cgi-bin/carddisp.pl?gene=EIF3L</a>                     |
| RNU6-961P       | RNA, U6 Small Nuclear 961, Pseudogene                | Pseudogene     | 8  | GC02P020175 | 2.28 | <a href="https://www.genecards.org/cgi-bin/carddisp.pl?gene=RNU6-961P">https://www.genecards.org/cgi-bin/carddisp.pl?gene=RNU6-961P</a>             |

|                 |                                                 |                |    |             |      |                                                                                                                                                     |
|-----------------|-------------------------------------------------|----------------|----|-------------|------|-----------------------------------------------------------------------------------------------------------------------------------------------------|
| ARHGAP8         | Rho GTPase Activating Protein 8                 | Protein Coding | 34 | GC22P044752 | 2.28 | <a href="https://www.genecards.org/cgi-bin/carddisp.pl?gene=ARHGAP8">https://www.genecards.org/cgi-bin/carddisp.pl?gene=ARHGAP8</a>                 |
| IL36B           | Interleukin 36 Beta                             | Protein Coding | 35 | GC02M113022 | 2.28 | <a href="https://www.genecards.org/cgi-bin/carddisp.pl?gene=IL36B">https://www.genecards.org/cgi-bin/carddisp.pl?gene=IL36B</a>                     |
| HNRNPF          | Heterogeneous Nuclear Ribonucleoprotein F       | Protein Coding | 40 | GC10M043385 | 2.28 | <a href="https://www.genecards.org/cgi-bin/carddisp.pl?gene=HNRNPF">https://www.genecards.org/cgi-bin/carddisp.pl?gene=HNRNPF</a>                   |
| SRSF1           | Serine And Arginine Rich Splicing Factor 1      | Protein Coding | 41 | GC17M058000 | 2.28 | <a href="https://www.genecards.org/cgi-bin/carddisp.pl?gene=SRSF1">https://www.genecards.org/cgi-bin/carddisp.pl?gene=SRSF1</a>                     |
| LOC389199       | Uncharacterized LOC389199                       | Protein Coding | 17 | GC04P007939 | 2.27 | <a href="https://www.genecards.org/cgi-bin/carddisp.pl?gene=LOC389199">https://www.genecards.org/cgi-bin/carddisp.pl?gene=LOC389199</a>             |
| RAB37           | RAB37, Member RAS Oncogene Family               | Protein Coding | 37 | GC17P074671 | 2.27 | <a href="https://www.genecards.org/cgi-bin/carddisp.pl?gene=RAB37">https://www.genecards.org/cgi-bin/carddisp.pl?gene=RAB37</a>                     |
| TRMT44          | TRNA Methyltransferase 44 Homolog               | Protein Coding | 32 | GC04P008439 | 2.26 | <a href="https://www.genecards.org/cgi-bin/carddisp.pl?gene=TRMT44">https://www.genecards.org/cgi-bin/carddisp.pl?gene=TRMT44</a>                   |
| RPS9            | Ribosomal Protein S9                            | Protein Coding | 41 | GC19P055552 | 2.26 | <a href="https://www.genecards.org/cgi-bin/carddisp.pl?gene=RPS9">https://www.genecards.org/cgi-bin/carddisp.pl?gene=RPS9</a>                       |
| ENSG00000255046 |                                                 | RNA Gene       | 8  | GC08M011885 | 2.26 | <a href="https://www.genecards.org/cgi-bin/carddisp.pl?gene=ENSG00000255046">https://www.genecards.org/cgi-bin/carddisp.pl?gene=ENSG00000255046</a> |
| ENSG00000287292 |                                                 | RNA Gene       | 6  | GC04P148445 | 2.26 | <a href="https://www.genecards.org/cgi-bin/carddisp.pl?gene=ENSG00000287292">https://www.genecards.org/cgi-bin/carddisp.pl?gene=ENSG00000287292</a> |
| ENSG00000222042 |                                                 | RNA Gene       | 6  | GC21M025169 | 2.26 | <a href="https://www.genecards.org/cgi-bin/carddisp.pl?gene=ENSG00000222042">https://www.genecards.org/cgi-bin/carddisp.pl?gene=ENSG00000222042</a> |
| lnc-LTBP3-4     |                                                 | RNA Gene       | 5  | GC11M065572 | 2.26 | <a href="https://www.genecards.org/cgi-bin/carddisp.pl?gene=lnc-LTBP3-4">https://www.genecards.org/cgi-bin/carddisp.pl?gene=lnc-LTBP3-4</a>         |
| OTX2P1          | OTX2 Pseudogene 1                               | Pseudogene     | 5  | GC09M075724 | 2.26 | <a href="https://www.genecards.org/cgi-bin/carddisp.pl?gene=OTX2P1">https://www.genecards.org/cgi-bin/carddisp.pl?gene=OTX2P1</a>                   |
| ENSG00000237936 |                                                 | Pseudogene     | 4  | GC10M029891 | 2.26 | <a href="https://www.genecards.org/cgi-bin/carddisp.pl?gene=ENSG00000237936">https://www.genecards.org/cgi-bin/carddisp.pl?gene=ENSG00000237936</a> |
| MN309375        |                                                 | RNA Gene       | 2  | GC11M065581 | 2.26 | <a href="https://www.genecards.org/cgi-bin/carddisp.pl?gene=MN309375">https://www.genecards.org/cgi-bin/carddisp.pl?gene=MN309375</a>               |
| BECN2           | Beclin 2                                        | Protein Coding | 22 | GC01P241957 | 2.25 | <a href="https://www.genecards.org/cgi-bin/carddisp.pl?gene=BECN2">https://www.genecards.org/cgi-bin/carddisp.pl?gene=BECN2</a>                     |
| INSIG2          | Insulin Induced Gene 2                          | Protein Coding | 40 | GC02P118088 | 2.25 | <a href="https://www.genecards.org/cgi-bin/carddisp.pl?gene=INSIG2">https://www.genecards.org/cgi-bin/carddisp.pl?gene=INSIG2</a>                   |
| RPL8            | Ribosomal Protein L8                            | Protein Coding | 41 | GC08M144790 | 2.25 | <a href="https://www.genecards.org/cgi-bin/carddisp.pl?gene=RPL8">https://www.genecards.org/cgi-bin/carddisp.pl?gene=RPL8</a>                       |
| GSTK1           | Glutathione S-Transferase Kappa 1               | Protein Coding | 40 | GC07P144971 | 2.24 | <a href="https://www.genecards.org/cgi-bin/carddisp.pl?gene=GSTK1">https://www.genecards.org/cgi-bin/carddisp.pl?gene=GSTK1</a>                     |
| RPS18           | Ribosomal Protein S18                           | Protein Coding | 40 | GC06P047372 | 2.24 | <a href="https://www.genecards.org/cgi-bin/carddisp.pl?gene=RPS18">https://www.genecards.org/cgi-bin/carddisp.pl?gene=RPS18</a>                     |
| TLL1            | Tolloid Like 1                                  | Protein Coding | 43 | GC04P165873 | 2.22 | <a href="https://www.genecards.org/cgi-bin/carddisp.pl?gene=TLL1">https://www.genecards.org/cgi-bin/carddisp.pl?gene=TLL1</a>                       |
| ENSG00000234389 |                                                 | RNA Gene       | 8  | GC02P102438 | 2.22 | <a href="https://www.genecards.org/cgi-bin/carddisp.pl?gene=ENSG00000234389">https://www.genecards.org/cgi-bin/carddisp.pl?gene=ENSG00000234389</a> |
| ENSG00000249631 |                                                 | RNA Gene       | 7  | GC04P013496 | 2.22 | <a href="https://www.genecards.org/cgi-bin/carddisp.pl?gene=ENSG00000249631">https://www.genecards.org/cgi-bin/carddisp.pl?gene=ENSG00000249631</a> |
| lnc-FLI1-5      |                                                 | RNA Gene       | 4  | GC11P128414 | 2.22 | <a href="https://www.genecards.org/cgi-bin/carddisp.pl?gene=lnc-FLI1-5">https://www.genecards.org/cgi-bin/carddisp.pl?gene=lnc-FLI1-5</a>           |
| ZNF267          | Zinc Finger Protein 267                         | Protein Coding | 36 | GC16P031885 | 2.22 | <a href="https://www.genecards.org/cgi-bin/carddisp.pl?gene=ZNF267">https://www.genecards.org/cgi-bin/carddisp.pl?gene=ZNF267</a>                   |
| G0S2            | G0/G1 Switch 2                                  | Protein Coding | 32 | GC01P209675 | 2.22 | <a href="https://www.genecards.org/cgi-bin/carddisp.pl?gene=G0S2">https://www.genecards.org/cgi-bin/carddisp.pl?gene=G0S2</a>                       |
| MIR1183         | MicroRNA 1183                                   | RNA Gene       | 14 | GC07P021510 | 2.21 | <a href="https://www.genecards.org/cgi-bin/carddisp.pl?gene=MIR1183">https://www.genecards.org/cgi-bin/carddisp.pl?gene=MIR1183</a>                 |
| HNRNPH1         | Heterogeneous Nuclear Ribonucleoprotein H1      | Protein Coding | 38 | GC05M179614 | 2.2  | <a href="https://www.genecards.org/cgi-bin/carddisp.pl?gene=HNRNPH1">https://www.genecards.org/cgi-bin/carddisp.pl?gene=HNRNPH1</a>                 |
| MIR449A         | MicroRNA 449a                                   | RNA Gene       | 20 | GC05M055171 | 2.2  | <a href="https://www.genecards.org/cgi-bin/carddisp.pl?gene=MIR449A">https://www.genecards.org/cgi-bin/carddisp.pl?gene=MIR449A</a>                 |
| C1QTNF1         | C1q And TNF Related 1                           | Protein Coding | 39 | GC17P079022 | 2.19 | <a href="https://www.genecards.org/cgi-bin/carddisp.pl?gene=C1QTNF1">https://www.genecards.org/cgi-bin/carddisp.pl?gene=C1QTNF1</a>                 |
| LRRFIP2         | LRR Binding FLII Interacting Protein 2          | Protein Coding | 38 | GC03M037052 | 2.19 | <a href="https://www.genecards.org/cgi-bin/carddisp.pl?gene=LRRFIP2">https://www.genecards.org/cgi-bin/carddisp.pl?gene=LRRFIP2</a>                 |
| ANXA9           | Annexin A9                                      | Protein Coding | 39 | GC01P150982 | 2.19 | <a href="https://www.genecards.org/cgi-bin/carddisp.pl?gene=ANXA9">https://www.genecards.org/cgi-bin/carddisp.pl?gene=ANXA9</a>                     |
| CRTC1           | CREB Regulated Transcription Coactivator 1      | Protein Coding | 42 | GC19P023333 | 2.18 | <a href="https://www.genecards.org/cgi-bin/carddisp.pl?gene=CRTC1">https://www.genecards.org/cgi-bin/carddisp.pl?gene=CRTC1</a>                     |
| SVIL-AS1        | SVIL Antisense RNA 1                            | RNA Gene       | 12 | GC10P029410 | 2.18 | <a href="https://www.genecards.org/cgi-bin/carddisp.pl?gene=SVIL-AS1">https://www.genecards.org/cgi-bin/carddisp.pl?gene=SVIL-AS1</a>               |
| SNRPD2          | Small Nuclear Ribonucleoprotein D2 Polypeptide  | Protein Coding | 40 | GC19M045688 | 2.18 | <a href="https://www.genecards.org/cgi-bin/carddisp.pl?gene=SNRPD2">https://www.genecards.org/cgi-bin/carddisp.pl?gene=SNRPD2</a>                   |
| SLC9A9-AS1      | SLC9A9 Antisense RNA 1                          | RNA Gene       | 13 | GC03P143342 | 2.18 | <a href="https://www.genecards.org/cgi-bin/carddisp.pl?gene=SLC9A9-AS1">https://www.genecards.org/cgi-bin/carddisp.pl?gene=SLC9A9-AS1</a>           |
| TEX36-AS1       | TEX36 Antisense RNA 1                           | RNA Gene       | 10 | GC10P125574 | 2.18 | <a href="https://www.genecards.org/cgi-bin/carddisp.pl?gene=TEX36-AS1">https://www.genecards.org/cgi-bin/carddisp.pl?gene=TEX36-AS1</a>             |
| LOC100130331    | POTE Ankyrin Domain Family, Member F Pseudogene | Pseudogene     | 9  | GC01P237862 | 2.18 | <a href="https://www.genecards.org/cgi-bin/carddisp.pl?gene=LOC100130331">https://www.genecards.org/cgi-bin/carddisp.pl?gene=LOC100130331</a>       |
| SLC9A9-AS2      | SLC9A9 Antisense RNA 2                          | RNA Gene       | 8  | GC03P143381 | 2.18 | <a href="https://www.genecards.org/cgi-bin/carddisp.pl?gene=SLC9A9-AS2">https://www.genecards.org/cgi-bin/carddisp.pl?gene=SLC9A9-AS2</a>           |

|                  |                                                       |                |    |             |                                                                                                                                                            |
|------------------|-------------------------------------------------------|----------------|----|-------------|------------------------------------------------------------------------------------------------------------------------------------------------------------|
| ENSG00000257322  |                                                       | RNA Gene       | 8  | GC12M093003 | 2.18 <a href="https://www.genecards.org/cgi-bin/carddisp.pl?gene=ENSG00000257322">https://www.genecards.org/cgi-bin/carddisp.pl?gene=ENSG00000257322</a>   |
| RNU6-908P        | RNA, U6 Small Nuclear 908, Pseudogene                 | Pseudogene     | 7  | GC10P029711 | 2.18 <a href="https://www.genecards.org/cgi-bin/carddisp.pl?gene=RNU6-908P">https://www.genecards.org/cgi-bin/carddisp.pl?gene=RNU6-908P</a>               |
| ENSG00000236501  |                                                       | RNA Gene       | 7  | GC02M176990 | 2.18 <a href="https://www.genecards.org/cgi-bin/carddisp.pl?gene=ENSG00000236501">https://www.genecards.org/cgi-bin/carddisp.pl?gene=ENSG00000236501</a>   |
| ENSG00000250541  |                                                       | RNA Gene       | 6  | GC04P025771 | 2.18 <a href="https://www.genecards.org/cgi-bin/carddisp.pl?gene=ENSG00000250541">https://www.genecards.org/cgi-bin/carddisp.pl?gene=ENSG00000250541</a>   |
| ENSG00000265994  |                                                       | RNA Gene       | 6  | GC18P028638 | 2.18 <a href="https://www.genecards.org/cgi-bin/carddisp.pl?gene=ENSG00000265994">https://www.genecards.org/cgi-bin/carddisp.pl?gene=ENSG00000265994</a>   |
| ENSG00000207171  |                                                       | RNA Gene       | 5  | GC04P168471 | 2.18 <a href="https://www.genecards.org/cgi-bin/carddisp.pl?gene=ENSG00000207171">https://www.genecards.org/cgi-bin/carddisp.pl?gene=ENSG00000207171</a>   |
| ENSG00000235464  |                                                       | RNA Gene       | 5  | GC07M035496 | 2.18 <a href="https://www.genecards.org/cgi-bin/carddisp.pl?gene=ENSG00000235464">https://www.genecards.org/cgi-bin/carddisp.pl?gene=ENSG00000235464</a>   |
| RNU1-35P         | RNA, U1 Small Nuclear 35, Pseudogene                  | Pseudogene     | 5  | GC08M135742 | 2.18 <a href="https://www.genecards.org/cgi-bin/carddisp.pl?gene=RNU1-35P">https://www.genecards.org/cgi-bin/carddisp.pl?gene=RNU1-35P</a>                 |
| EEF1A1P20        | Eukaryotic Translation Elongation Factor 1 Alpha 1 Ps | Pseudogene     | 5  | GC05P099996 | 2.18 <a href="https://www.genecards.org/cgi-bin/carddisp.pl?gene=EEF1A1P20">https://www.genecards.org/cgi-bin/carddisp.pl?gene=EEF1A1P20</a>               |
| ENSG00000236389  |                                                       | RNA Gene       | 5  | GC06M134706 | 2.18 <a href="https://www.genecards.org/cgi-bin/carddisp.pl?gene=ENSG00000236389">https://www.genecards.org/cgi-bin/carddisp.pl?gene=ENSG00000236389</a>   |
| ENSG00000287032  |                                                       | RNA Gene       | 4  | GC07M035614 | 2.18 <a href="https://www.genecards.org/cgi-bin/carddisp.pl?gene=ENSG00000287032">https://www.genecards.org/cgi-bin/carddisp.pl?gene=ENSG00000287032</a>   |
| ENSG00000284676  |                                                       | RNA Gene       | 4  | GC01P029755 | 2.18 <a href="https://www.genecards.org/cgi-bin/carddisp.pl?gene=ENSG00000284676">https://www.genecards.org/cgi-bin/carddisp.pl?gene=ENSG00000284676</a>   |
| lnc-DDX60L-3     |                                                       | RNA Gene       | 4  | GC04M168468 | 2.18 <a href="https://www.genecards.org/cgi-bin/carddisp.pl?gene=lnc-DDX60L-3">https://www.genecards.org/cgi-bin/carddisp.pl?gene=lnc-DDX60L-3</a>         |
| ENSG00000226973  |                                                       | Pseudogene     | 4  | GC01P115471 | 2.18 <a href="https://www.genecards.org/cgi-bin/carddisp.pl?gene=ENSG00000226973">https://www.genecards.org/cgi-bin/carddisp.pl?gene=ENSG00000226973</a>   |
| ENSG00000199378  |                                                       | RNA Gene       | 4  | GC05P100021 | 2.18 <a href="https://www.genecards.org/cgi-bin/carddisp.pl?gene=ENSG00000199378">https://www.genecards.org/cgi-bin/carddisp.pl?gene=ENSG00000199378</a>   |
| lnc-KCNK7-1      |                                                       | RNA Gene       | 4  | GC11M065582 | 2.18 <a href="https://www.genecards.org/cgi-bin/carddisp.pl?gene=lnc-KCNK7-1">https://www.genecards.org/cgi-bin/carddisp.pl?gene=lnc-KCNK7-1</a>           |
| HSALNG0076986    |                                                       | RNA Gene       | 4  | GC10M030503 | 2.18 <a href="https://www.genecards.org/cgi-bin/carddisp.pl?gene=HSALNG0076986">https://www.genecards.org/cgi-bin/carddisp.pl?gene=HSALNG0076986</a>       |
| ENSG00000276627  |                                                       | RNA Gene       | 4  | GC20P060761 | 2.18 <a href="https://www.genecards.org/cgi-bin/carddisp.pl?gene=ENSG00000276627">https://www.genecards.org/cgi-bin/carddisp.pl?gene=ENSG00000276627</a>   |
| piR-41195-080    |                                                       | RNA Gene       | 3  | GC08M011894 | 2.18 <a href="https://www.genecards.org/cgi-bin/carddisp.pl?gene=piR-41195-080">https://www.genecards.org/cgi-bin/carddisp.pl?gene=piR-41195-080</a>       |
| lnc-UBE2N-9      |                                                       | RNA Gene       | 3  | GC12M093168 | 2.18 <a href="https://www.genecards.org/cgi-bin/carddisp.pl?gene=lnc-UBE2N-9">https://www.genecards.org/cgi-bin/carddisp.pl?gene=lnc-UBE2N-9</a>           |
| lnc-EDRF1-4      |                                                       | RNA Gene       | 3  | GC10P125590 | 2.18 <a href="https://www.genecards.org/cgi-bin/carddisp.pl?gene=lnc-EDRF1-4">https://www.genecards.org/cgi-bin/carddisp.pl?gene=lnc-EDRF1-4</a>           |
| piR-59297-626    |                                                       | RNA Gene       | 3  | GC08P011819 | 2.18 <a href="https://www.genecards.org/cgi-bin/carddisp.pl?gene=piR-59297-626">https://www.genecards.org/cgi-bin/carddisp.pl?gene=piR-59297-626</a>       |
| LOC105372698     | Uncharacterized LOC105372698                          | Protein Coding | 3  | GC20P060257 | 2.18 <a href="https://www.genecards.org/cgi-bin/carddisp.pl?gene=LOC105372698">https://www.genecards.org/cgi-bin/carddisp.pl?gene=LOC105372698</a>         |
| piR-38051-198    |                                                       | RNA Gene       | 3  | GC04M025834 | 2.18 <a href="https://www.genecards.org/cgi-bin/carddisp.pl?gene=piR-38051-198">https://www.genecards.org/cgi-bin/carddisp.pl?gene=piR-38051-198</a>       |
| HSALNG0076987    |                                                       | RNA Gene       | 3  | GC10P029810 | 2.18 <a href="https://www.genecards.org/cgi-bin/carddisp.pl?gene=HSALNG0076987">https://www.genecards.org/cgi-bin/carddisp.pl?gene=HSALNG0076987</a>       |
| LOC107986198     | Uncharacterized LOC107986198                          | RNA Gene       | 3  | GC04M168488 | 2.18 <a href="https://www.genecards.org/cgi-bin/carddisp.pl?gene=LOC107986198">https://www.genecards.org/cgi-bin/carddisp.pl?gene=LOC107986198</a>         |
| LOC102723733     | Uncharacterized LOC102723733                          | RNA Gene       | 3  | GC04P025862 | 2.18 <a href="https://www.genecards.org/cgi-bin/carddisp.pl?gene=LOC102723733">https://www.genecards.org/cgi-bin/carddisp.pl?gene=LOC102723733</a>         |
| ENSG00000270927  |                                                       | Pseudogene     | 3  | GC01M029904 | 2.18 <a href="https://www.genecards.org/cgi-bin/carddisp.pl?gene=ENSG00000270927">https://www.genecards.org/cgi-bin/carddisp.pl?gene=ENSG00000270927</a>   |
| piR-57133-376    |                                                       | RNA Gene       | 2  | GC20P060683 | 2.18 <a href="https://www.genecards.org/cgi-bin/carddisp.pl?gene=piR-57133-376">https://www.genecards.org/cgi-bin/carddisp.pl?gene=piR-57133-376</a>       |
| AB372775         |                                                       | RNA Gene       | 2  | GC10P069827 | 2.18 <a href="https://www.genecards.org/cgi-bin/carddisp.pl?gene=AB372775">https://www.genecards.org/cgi-bin/carddisp.pl?gene=AB372775</a>                 |
| RF00994-591      |                                                       | RNA Gene       | 2  | GC20P060710 | 2.18 <a href="https://www.genecards.org/cgi-bin/carddisp.pl?gene=RF00994-591">https://www.genecards.org/cgi-bin/carddisp.pl?gene=RF00994-591</a>           |
| piR-31109-001    |                                                       | RNA Gene       | 2  | GC10P125633 | 2.18 <a href="https://www.genecards.org/cgi-bin/carddisp.pl?gene=piR-31109-001">https://www.genecards.org/cgi-bin/carddisp.pl?gene=piR-31109-001</a>       |
| RF00017-1202     |                                                       | RNA Gene       | 2  | GC12P093145 | 2.18 <a href="https://www.genecards.org/cgi-bin/carddisp.pl?gene=RF00017-1202">https://www.genecards.org/cgi-bin/carddisp.pl?gene=RF00017-1202</a>         |
| lnc-AIFM2-3      |                                                       | RNA Gene       | 2  | GC10M069839 | 2.18 <a href="https://www.genecards.org/cgi-bin/carddisp.pl?gene=lnc-AIFM2-3">https://www.genecards.org/cgi-bin/carddisp.pl?gene=lnc-AIFM2-3</a>           |
| ENSG000000283174 |                                                       | Pseudogene     | 1  | GC01M237940 | 2.18 <a href="https://www.genecards.org/cgi-bin/carddisp.pl?gene=ENSG000000283174">https://www.genecards.org/cgi-bin/carddisp.pl?gene=ENSG000000283174</a> |
| ENSG00000213117  |                                                       | Pseudogene     | 1  | GC06P134898 | 2.18 <a href="https://www.genecards.org/cgi-bin/carddisp.pl?gene=ENSG00000213117">https://www.genecards.org/cgi-bin/carddisp.pl?gene=ENSG00000213117</a>   |
| ENSG00000254939  |                                                       | Pseudogene     | 1  | GC11M098568 | 2.18 <a href="https://www.genecards.org/cgi-bin/carddisp.pl?gene=ENSG00000254939">https://www.genecards.org/cgi-bin/carddisp.pl?gene=ENSG00000254939</a>   |
| RPL24            | Ribosomal Protein L24                                 | Protein Coding | 39 | GC03M101681 | 2.17 <a href="https://www.genecards.org/cgi-bin/carddisp.pl?gene=RPL24">https://www.genecards.org/cgi-bin/carddisp.pl?gene=RPL24</a>                       |
| RNU6-976P        | RNA, U6 Small Nuclear 976, Pseudogene                 | Pseudogene     | 6  | GC14P084739 | 2.17 <a href="https://www.genecards.org/cgi-bin/carddisp.pl?gene=RNU6-976P">https://www.genecards.org/cgi-bin/carddisp.pl?gene=RNU6-976P</a>               |

|                 |                                                       |                |    |             |      |                                                                                                                                                     |
|-----------------|-------------------------------------------------------|----------------|----|-------------|------|-----------------------------------------------------------------------------------------------------------------------------------------------------|
| ENSG00000283991 |                                                       | RNA Gene       | 4  | GC07M004130 | 2.17 | <a href="https://www.genecards.org/cgi-bin/carddisp.pl?gene=ENSG00000283991">https://www.genecards.org/cgi-bin/carddisp.pl?gene=ENSG00000283991</a> |
| lnc-TRIB1-7     |                                                       | RNA Gene       | 4  | GC08P125495 | 2.17 | <a href="https://www.genecards.org/cgi-bin/carddisp.pl?gene=lnc-TRIB1-7">https://www.genecards.org/cgi-bin/carddisp.pl?gene=lnc-TRIB1-7</a>         |
| LOC105375131    | Uncharacterized LOC105375131                          | RNA Gene       | 4  | GC07M004126 | 2.17 | <a href="https://www.genecards.org/cgi-bin/carddisp.pl?gene=LOC105375131">https://www.genecards.org/cgi-bin/carddisp.pl?gene=LOC105375131</a>       |
| ENSG00000268473 |                                                       | Pseudogene     | 2  | GC16M086434 | 2.17 | <a href="https://www.genecards.org/cgi-bin/carddisp.pl?gene=ENSG00000268473">https://www.genecards.org/cgi-bin/carddisp.pl?gene=ENSG00000268473</a> |
| STMP1           | Short Transmembrane Mitochondrial Protein 1           | Protein Coding | 22 | GC07P135663 | 2.17 | <a href="https://www.genecards.org/cgi-bin/carddisp.pl?gene=STMP1">https://www.genecards.org/cgi-bin/carddisp.pl?gene=STMP1</a>                     |
| DHX9            | DExH-Box Helicase 9                                   | Protein Coding | 40 | GC01P182839 | 2.16 | <a href="https://www.genecards.org/cgi-bin/carddisp.pl?gene=DHX9">https://www.genecards.org/cgi-bin/carddisp.pl?gene=DHX9</a>                       |
| PSME2           | Proteasome Activator Subunit 2                        | Protein Coding | 43 | GC14M024143 | 2.16 | <a href="https://www.genecards.org/cgi-bin/carddisp.pl?gene=PSME2">https://www.genecards.org/cgi-bin/carddisp.pl?gene=PSME2</a>                     |
| RBFOX1          | RNA Binding Fox-1 Homolog 1                           | Protein Coding | 37 | GC16P005240 | 2.16 | <a href="https://www.genecards.org/cgi-bin/carddisp.pl?gene=RBFOX1">https://www.genecards.org/cgi-bin/carddisp.pl?gene=RBFOX1</a>                   |
| THNSL2          | Threonine Synthase Like 2                             | Protein Coding | 33 | GC02P088170 | 2.15 | <a href="https://www.genecards.org/cgi-bin/carddisp.pl?gene=THNSL2">https://www.genecards.org/cgi-bin/carddisp.pl?gene=THNSL2</a>                   |
| LINC00355       | Long Intergenic Non-Protein Coding RNA 355            | RNA Gene       | 14 | GC13M063838 | 2.14 | <a href="https://www.genecards.org/cgi-bin/carddisp.pl?gene=LINC00355">https://www.genecards.org/cgi-bin/carddisp.pl?gene=LINC00355</a>             |
| AP2A2           | Adaptor Related Protein Complex 2 Subunit Alpha 2     | Protein Coding | 37 | GC11P000915 | 2.14 | <a href="https://www.genecards.org/cgi-bin/carddisp.pl?gene=AP2A2">https://www.genecards.org/cgi-bin/carddisp.pl?gene=AP2A2</a>                     |
| TUBA8           | Tubulin Alpha 8                                       | Protein Coding | 45 | GC22P018110 | 2.13 | <a href="https://www.genecards.org/cgi-bin/carddisp.pl?gene=TUBA8">https://www.genecards.org/cgi-bin/carddisp.pl?gene=TUBA8</a>                     |
| LOC101929710    | Uncharacterized LOC101929710                          | RNA Gene       | 10 | GC05P095962 | 2.12 | <a href="https://www.genecards.org/cgi-bin/carddisp.pl?gene=LOC101929710">https://www.genecards.org/cgi-bin/carddisp.pl?gene=LOC101929710</a>       |
| INPP4B          | Inositol Polyphosphate-4-Phosphatase Type II B        | Protein Coding | 39 | GC04M142023 | 2.12 | <a href="https://www.genecards.org/cgi-bin/carddisp.pl?gene=INPP4B">https://www.genecards.org/cgi-bin/carddisp.pl?gene=INPP4B</a>                   |
| PABPC1          | Poly(A) Binding Protein Cytoplasmic 1                 | Protein Coding | 41 | GC08M100685 | 2.12 | <a href="https://www.genecards.org/cgi-bin/carddisp.pl?gene=PABPC1">https://www.genecards.org/cgi-bin/carddisp.pl?gene=PABPC1</a>                   |
| POT1-AS1        | POT1 Antisense RNA 1                                  | RNA Gene       | 16 | GC07P124929 | 2.12 | <a href="https://www.genecards.org/cgi-bin/carddisp.pl?gene=POT1-AS1">https://www.genecards.org/cgi-bin/carddisp.pl?gene=POT1-AS1</a>               |
| ST13P12         | ST13, Hsp70 Interacting Protein Pseudogene 12         | Pseudogene     | 6  | GC05P082968 | 2.12 | <a href="https://www.genecards.org/cgi-bin/carddisp.pl?gene=ST13P12">https://www.genecards.org/cgi-bin/carddisp.pl?gene=ST13P12</a>                 |
| NLRP2           | NLR Family Pyrin Domain Containing 2                  | Protein Coding | 41 | GC19P054953 | 2.11 | <a href="https://www.genecards.org/cgi-bin/carddisp.pl?gene=NLRP2">https://www.genecards.org/cgi-bin/carddisp.pl?gene=NLRP2</a>                     |
| LINC02789       | Long Intergenic Non-Protein Coding RNA 2789           | RNA Gene       | 8  | GC01P199149 | 2.11 | <a href="https://www.genecards.org/cgi-bin/carddisp.pl?gene=LINC02789">https://www.genecards.org/cgi-bin/carddisp.pl?gene=LINC02789</a>             |
| LINC01090       | Long Intergenic Non-Protein Coding RNA 1090           | RNA Gene       | 13 | GC02M187712 | 2.11 | <a href="https://www.genecards.org/cgi-bin/carddisp.pl?gene=LINC01090">https://www.genecards.org/cgi-bin/carddisp.pl?gene=LINC01090</a>             |
| PSAPL1          | Prosaposin Like 1                                     | Protein Coding | 32 | GC04M007434 | 2.11 | <a href="https://www.genecards.org/cgi-bin/carddisp.pl?gene=PSAPL1">https://www.genecards.org/cgi-bin/carddisp.pl?gene=PSAPL1</a>                   |
| ENSG00000237596 |                                                       | Uncategorized  | 7  | GC06M135991 | 2.11 | <a href="https://www.genecards.org/cgi-bin/carddisp.pl?gene=ENSG00000237596">https://www.genecards.org/cgi-bin/carddisp.pl?gene=ENSG00000237596</a> |
| ENSG00000250001 |                                                       | RNA Gene       | 7  | GC05M009519 | 2.11 | <a href="https://www.genecards.org/cgi-bin/carddisp.pl?gene=ENSG00000250001">https://www.genecards.org/cgi-bin/carddisp.pl?gene=ENSG00000250001</a> |
| LOC105373944    | Translation Initiation Factor IF-2-Like               | Protein Coding | 6  | GC02M236161 | 2.11 | <a href="https://www.genecards.org/cgi-bin/carddisp.pl?gene=LOC105373944">https://www.genecards.org/cgi-bin/carddisp.pl?gene=LOC105373944</a>       |
| ENSG00000248537 |                                                       | RNA Gene       | 6  | GC05P009363 | 2.11 | <a href="https://www.genecards.org/cgi-bin/carddisp.pl?gene=ENSG00000248537">https://www.genecards.org/cgi-bin/carddisp.pl?gene=ENSG00000248537</a> |
| HNRNPA1P58      | Heterogeneous Nuclear Ribonucleoprotein A1 Pseudogene | Pseudogene     | 4  | GC06P024003 | 2.11 | <a href="https://www.genecards.org/cgi-bin/carddisp.pl?gene=HNRNPA1P58">https://www.genecards.org/cgi-bin/carddisp.pl?gene=HNRNPA1P58</a>           |
| LOC101060035    | DnaJ Homolog Subfamily C Member 24 Pseudogene         | Pseudogene     | 4  | GC05M133720 | 2.11 | <a href="https://www.genecards.org/cgi-bin/carddisp.pl?gene=LOC101060035">https://www.genecards.org/cgi-bin/carddisp.pl?gene=LOC101060035</a>       |
| SLC23A2         | Solute Carrier Family 23 Member 2                     | Protein Coding | 42 | GC20M004852 | 2.1  | <a href="https://www.genecards.org/cgi-bin/carddisp.pl?gene=SLC23A2">https://www.genecards.org/cgi-bin/carddisp.pl?gene=SLC23A2</a>                 |
| ACTR2           | Actin Related Protein 2                               | Protein Coding | 43 | GC02P065227 | 2.09 | <a href="https://www.genecards.org/cgi-bin/carddisp.pl?gene=ACTR2">https://www.genecards.org/cgi-bin/carddisp.pl?gene=ACTR2</a>                     |
| FECHP1          | Ferrochelatase Pseudogene 1                           | Pseudogene     | 6  | GC03P034873 | 2.09 | <a href="https://www.genecards.org/cgi-bin/carddisp.pl?gene=FECHP1">https://www.genecards.org/cgi-bin/carddisp.pl?gene=FECHP1</a>                   |
| EIF4A3          | Eukaryotic Translation Initiation Factor 4A3          | Protein Coding | 43 | GC17M080135 | 2.08 | <a href="https://www.genecards.org/cgi-bin/carddisp.pl?gene=EIF4A3">https://www.genecards.org/cgi-bin/carddisp.pl?gene=EIF4A3</a>                   |
| LOC101928135    | Uncharacterized LOC101928135                          | RNA Gene       | 6  | GC03M034875 | 2.08 | <a href="https://www.genecards.org/cgi-bin/carddisp.pl?gene=LOC101928135">https://www.genecards.org/cgi-bin/carddisp.pl?gene=LOC101928135</a>       |
| KRT8P18         | Keratin 8 Pseudogene 18                               | Pseudogene     | 5  | GC03M035233 | 2.08 | <a href="https://www.genecards.org/cgi-bin/carddisp.pl?gene=KRT8P18">https://www.genecards.org/cgi-bin/carddisp.pl?gene=KRT8P18</a>                 |
| ACTR3           | Actin Related Protein 3                               | Protein Coding | 42 | GC02P113889 | 2.08 | <a href="https://www.genecards.org/cgi-bin/carddisp.pl?gene=ACTR3">https://www.genecards.org/cgi-bin/carddisp.pl?gene=ACTR3</a>                     |
| PRR5-ARHGAP8    | PRR5-ARHGAP8 Readthrough                              | Protein Coding | 27 | GC22P044702 | 2.08 | <a href="https://www.genecards.org/cgi-bin/carddisp.pl?gene=PRR5-ARHGAP8">https://www.genecards.org/cgi-bin/carddisp.pl?gene=PRR5-ARHGAP8</a>       |
| PHF21B          | PHD Finger Protein 21B                                | Protein Coding | 35 | GC22M044881 | 2.08 | <a href="https://www.genecards.org/cgi-bin/carddisp.pl?gene=PHF21B">https://www.genecards.org/cgi-bin/carddisp.pl?gene=PHF21B</a>                   |
| ENSG00000274121 |                                                       | RNA Gene       | 5  | GC01P231814 | 2.07 | <a href="https://www.genecards.org/cgi-bin/carddisp.pl?gene=ENSG00000274121">https://www.genecards.org/cgi-bin/carddisp.pl?gene=ENSG00000274121</a> |
| ENSG00000286071 |                                                       | RNA Gene       | 4  | GC01M231767 | 2.07 | <a href="https://www.genecards.org/cgi-bin/carddisp.pl?gene=ENSG00000286071">https://www.genecards.org/cgi-bin/carddisp.pl?gene=ENSG00000286071</a> |
| ATP6AP1L        | ATPase H+ Transporting Accessory Protein 1 Like       | Protein Coding | 26 | GC05P082279 | 2.07 | <a href="https://www.genecards.org/cgi-bin/carddisp.pl?gene=ATP6AP1L">https://www.genecards.org/cgi-bin/carddisp.pl?gene=ATP6AP1L</a>               |

|                 |                                                     |                |    |             |      |                                                                                                                                                     |
|-----------------|-----------------------------------------------------|----------------|----|-------------|------|-----------------------------------------------------------------------------------------------------------------------------------------------------|
| SLC23A1         | Solute Carrier Family 23 Member 1                   | Protein Coding | 43 | GC05M139377 | 2.07 | <a href="https://www.genecards.org/cgi-bin/carddisp.pl?gene=SLC23A1">https://www.genecards.org/cgi-bin/carddisp.pl?gene=SLC23A1</a>                 |
| SRSF7           | Serine And Arginine Rich Splicing Factor 7          | Protein Coding | 39 | GC02M038709 | 2.07 | <a href="https://www.genecards.org/cgi-bin/carddisp.pl?gene=SRSF7">https://www.genecards.org/cgi-bin/carddisp.pl?gene=SRSF7</a>                     |
| STARP1          | Steroidogenic Acute Regulatory Protein Pseudogene 1 | Pseudogene     | 7  | GC13M065280 | 2.06 | <a href="https://www.genecards.org/cgi-bin/carddisp.pl?gene=STARP1">https://www.genecards.org/cgi-bin/carddisp.pl?gene=STARP1</a>                   |
| LINC00888       | Long Intergenic Non-Protein Coding RNA 888          | RNA Gene       | 13 | GC03P183447 | 2.05 | <a href="https://www.genecards.org/cgi-bin/carddisp.pl?gene=LINC00888">https://www.genecards.org/cgi-bin/carddisp.pl?gene=LINC00888</a>             |
| PBX2P1          | PBX Homeobox 2 Pseudogene 1                         | Pseudogene     | 11 | GC03P143176 | 2.05 | <a href="https://www.genecards.org/cgi-bin/carddisp.pl?gene=PBX2P1">https://www.genecards.org/cgi-bin/carddisp.pl?gene=PBX2P1</a>                   |
| SERPINB4        | Serpin Family B Member 4                            | Protein Coding | 38 | GC18M063637 | 2.05 | <a href="https://www.genecards.org/cgi-bin/carddisp.pl?gene=SERPINB4">https://www.genecards.org/cgi-bin/carddisp.pl?gene=SERPINB4</a>               |
| HNRNPA3         | Heterogeneous Nuclear Ribonucleoprotein A3          | Protein Coding | 37 | GC02P177212 | 2.04 | <a href="https://www.genecards.org/cgi-bin/carddisp.pl?gene=HNRNPA3">https://www.genecards.org/cgi-bin/carddisp.pl?gene=HNRNPA3</a>                 |
| USP4            | Ubiquitin Specific Peptidase 4                      | Protein Coding | 43 | GC03M049277 | 2.04 | <a href="https://www.genecards.org/cgi-bin/carddisp.pl?gene=USP4">https://www.genecards.org/cgi-bin/carddisp.pl?gene=USP4</a>                       |
| TET1            | Tet Methylcytosine Dioxygenase 1                    | Protein Coding | 38 | GC10P068560 | 2.04 | <a href="https://www.genecards.org/cgi-bin/carddisp.pl?gene=TET1">https://www.genecards.org/cgi-bin/carddisp.pl?gene=TET1</a>                       |
| TPI1P1          | Triosephosphate Isomerase 1 Pseudogene 1            | Pseudogene     | 7  | GC01P076699 | 2.04 | <a href="https://www.genecards.org/cgi-bin/carddisp.pl?gene=TPI1P1">https://www.genecards.org/cgi-bin/carddisp.pl?gene=TPI1P1</a>                   |
| LOC401864       | Chloride Intracellular Channel 1 Pseudogene         | Pseudogene     | 5  | GC16M086468 | 2.03 | <a href="https://www.genecards.org/cgi-bin/carddisp.pl?gene=LOC401864">https://www.genecards.org/cgi-bin/carddisp.pl?gene=LOC401864</a>             |
| SLC23A4P        | Solute Carrier Family 23 Member 4, Pseudogene       | Pseudogene     | 5  | GC07M135270 | 2.03 | <a href="https://www.genecards.org/cgi-bin/carddisp.pl?gene=SLC23A4P">https://www.genecards.org/cgi-bin/carddisp.pl?gene=SLC23A4P</a>               |
| MIR378C         | MicroRNA 378c                                       | RNA Gene       | 13 | GC10M130962 | 2.03 | <a href="https://www.genecards.org/cgi-bin/carddisp.pl?gene=MIR378C">https://www.genecards.org/cgi-bin/carddisp.pl?gene=MIR378C</a>                 |
| MIR4772         | MicroRNA 4772                                       | RNA Gene       | 13 | GC02P102432 | 2.03 | <a href="https://www.genecards.org/cgi-bin/carddisp.pl?gene=MIR4772">https://www.genecards.org/cgi-bin/carddisp.pl?gene=MIR4772</a>                 |
| AP2A1           | Adaptor Related Protein Complex 2 Subunit Alpha 1   | Protein Coding | 38 | GC19P049766 | 2.03 | <a href="https://www.genecards.org/cgi-bin/carddisp.pl?gene=AP2A1">https://www.genecards.org/cgi-bin/carddisp.pl?gene=AP2A1</a>                     |
| CPB2-AS1        | CPB2 Antisense RNA 1                                | RNA Gene       | 14 | GC13P046052 | 2.03 | <a href="https://www.genecards.org/cgi-bin/carddisp.pl?gene=CPB2-AS1">https://www.genecards.org/cgi-bin/carddisp.pl?gene=CPB2-AS1</a>               |
| HDHD5-AS1       | HDHD5 Antisense RNA 1                               | RNA Gene       | 12 | GC22P017160 | 2.03 | <a href="https://www.genecards.org/cgi-bin/carddisp.pl?gene=HDHD5-AS1">https://www.genecards.org/cgi-bin/carddisp.pl?gene=HDHD5-AS1</a>             |
| LINC01029       | Long Intergenic Non-Protein Coding RNA 1029         | RNA Gene       | 12 | GC18M077972 | 2.03 | <a href="https://www.genecards.org/cgi-bin/carddisp.pl?gene=LINC01029">https://www.genecards.org/cgi-bin/carddisp.pl?gene=LINC01029</a>             |
| SNORA63E        | Small Nucleolar RNA, H/ACA Box 63E                  | RNA Gene       | 9  | GC03P183457 | 2.03 | <a href="https://www.genecards.org/cgi-bin/carddisp.pl?gene=SNORA63E">https://www.genecards.org/cgi-bin/carddisp.pl?gene=SNORA63E</a>               |
| LINC02392       | Long Intergenic Non-Protein Coding RNA 2392         | RNA Gene       | 9  | GC12P090282 | 2.03 | <a href="https://www.genecards.org/cgi-bin/carddisp.pl?gene=LINC02392">https://www.genecards.org/cgi-bin/carddisp.pl?gene=LINC02392</a>             |
| LINC02534       | Long Intergenic Non-Protein Coding RNA 2534         | RNA Gene       | 9  | GC06M115635 | 2.03 | <a href="https://www.genecards.org/cgi-bin/carddisp.pl?gene=LINC02534">https://www.genecards.org/cgi-bin/carddisp.pl?gene=LINC02534</a>             |
| ENSG00000243273 |                                                     | RNA Gene       | 8  | GC03P150890 | 2.03 | <a href="https://www.genecards.org/cgi-bin/carddisp.pl?gene=ENSG00000243273">https://www.genecards.org/cgi-bin/carddisp.pl?gene=ENSG00000243273</a> |
| SNORA63D        | Small Nucleolar RNA, H/ACA Box 63D                  | RNA Gene       | 8  | GC03P183467 | 2.03 | <a href="https://www.genecards.org/cgi-bin/carddisp.pl?gene=SNORA63D">https://www.genecards.org/cgi-bin/carddisp.pl?gene=SNORA63D</a>               |
| LINC01818       | Long Intergenic Non-Protein Coding RNA 1818         | RNA Gene       | 8  | GC02P150170 | 2.03 | <a href="https://www.genecards.org/cgi-bin/carddisp.pl?gene=LINC01818">https://www.genecards.org/cgi-bin/carddisp.pl?gene=LINC01818</a>             |
| ENSG00000260234 |                                                     | Protein Coding | 8  | GC03M150882 | 2.03 | <a href="https://www.genecards.org/cgi-bin/carddisp.pl?gene=ENSG00000260234">https://www.genecards.org/cgi-bin/carddisp.pl?gene=ENSG00000260234</a> |
| ENSG00000259053 |                                                     | RNA Gene       | 7  | GC14M094051 | 2.03 | <a href="https://www.genecards.org/cgi-bin/carddisp.pl?gene=ENSG00000259053">https://www.genecards.org/cgi-bin/carddisp.pl?gene=ENSG00000259053</a> |
| ENSG00000251152 |                                                     | RNA Gene       | 7  | GC04P013479 | 2.03 | <a href="https://www.genecards.org/cgi-bin/carddisp.pl?gene=ENSG00000251152">https://www.genecards.org/cgi-bin/carddisp.pl?gene=ENSG00000251152</a> |
| RNU6-655P       | RNA, U6 Small Nuclear 655, Pseudogene               | Pseudogene     | 6  | GC18P078036 | 2.03 | <a href="https://www.genecards.org/cgi-bin/carddisp.pl?gene=RNU6-655P">https://www.genecards.org/cgi-bin/carddisp.pl?gene=RNU6-655P</a>             |
| RNU6-161P       | RNA, U6 Small Nuclear 161, Pseudogene               | Pseudogene     | 6  | GC01P076753 | 2.03 | <a href="https://www.genecards.org/cgi-bin/carddisp.pl?gene=RNU6-161P">https://www.genecards.org/cgi-bin/carddisp.pl?gene=RNU6-161P</a>             |
| ENSG00000241679 |                                                     | RNA Gene       | 6  | GC03P143123 | 2.03 | <a href="https://www.genecards.org/cgi-bin/carddisp.pl?gene=ENSG00000241679">https://www.genecards.org/cgi-bin/carddisp.pl?gene=ENSG00000241679</a> |
| RPL35AP33       | Ribosomal Protein L35a Pseudogene 33                | Pseudogene     | 6  | GC16M068478 | 2.03 | <a href="https://www.genecards.org/cgi-bin/carddisp.pl?gene=RPL35AP33">https://www.genecards.org/cgi-bin/carddisp.pl?gene=RPL35AP33</a>             |
| ENSG00000232739 |                                                     | RNA Gene       | 6  | GC10P015237 | 2.03 | <a href="https://www.genecards.org/cgi-bin/carddisp.pl?gene=ENSG00000232739">https://www.genecards.org/cgi-bin/carddisp.pl?gene=ENSG00000232739</a> |
| ENSG00000234481 |                                                     | RNA Gene       | 6  | GC01P036773 | 2.03 | <a href="https://www.genecards.org/cgi-bin/carddisp.pl?gene=ENSG00000234481">https://www.genecards.org/cgi-bin/carddisp.pl?gene=ENSG00000234481</a> |
| ENSG00000252040 |                                                     | RNA Gene       | 6  | GC16M068630 | 2.03 | <a href="https://www.genecards.org/cgi-bin/carddisp.pl?gene=ENSG00000252040">https://www.genecards.org/cgi-bin/carddisp.pl?gene=ENSG00000252040</a> |
| ENSG00000253092 |                                                     | RNA Gene       | 6  | GC03P183452 | 2.03 | <a href="https://www.genecards.org/cgi-bin/carddisp.pl?gene=ENSG00000253092">https://www.genecards.org/cgi-bin/carddisp.pl?gene=ENSG00000253092</a> |
| ENSG00000249664 |                                                     | RNA Gene       | 6  | GC05M083012 | 2.03 | <a href="https://www.genecards.org/cgi-bin/carddisp.pl?gene=ENSG00000249664">https://www.genecards.org/cgi-bin/carddisp.pl?gene=ENSG00000249664</a> |
| LGMNP1          | Legumain Pseudogene 1                               | Pseudogene     | 6  | GC13M064957 | 2.03 | <a href="https://www.genecards.org/cgi-bin/carddisp.pl?gene=LGMNP1">https://www.genecards.org/cgi-bin/carddisp.pl?gene=LGMNP1</a>                   |
| ENSG00000253354 |                                                     | RNA Gene       | 6  | GC08P040370 | 2.03 | <a href="https://www.genecards.org/cgi-bin/carddisp.pl?gene=ENSG00000253354">https://www.genecards.org/cgi-bin/carddisp.pl?gene=ENSG00000253354</a> |
| ENSG00000272479 |                                                     | RNA Gene       | 6  | GC08M040519 | 2.03 | <a href="https://www.genecards.org/cgi-bin/carddisp.pl?gene=ENSG00000272479">https://www.genecards.org/cgi-bin/carddisp.pl?gene=ENSG00000272479</a> |

|                  |                                                          |                |   |             |      |                                                                                                                                                       |
|------------------|----------------------------------------------------------|----------------|---|-------------|------|-------------------------------------------------------------------------------------------------------------------------------------------------------|
| LINC02822        | Long Intergenic Non-Protein Coding RNA 2822              | RNA Gene       | 6 | GC12P090577 | 2.03 | <a href="https://www.genecards.org/cgi-bin/carddisp.pl?gene=LINC02822">https://www.genecards.org/cgi-bin/carddisp.pl?gene=LINC02822</a>               |
| HNRNPA3P5        | Heterogeneous Nuclear Ribonucleoprotein A3 Pseudogene    | Pseudogene     | 5 | GC13M065787 | 2.03 | <a href="https://www.genecards.org/cgi-bin/carddisp.pl?gene=HNRNPA3P5">https://www.genecards.org/cgi-bin/carddisp.pl?gene=HNRNPA3P5</a>               |
| RNU6-1172P       | RNA, U6 Small Nuclear 1172, Pseudogene                   | Pseudogene     | 5 | GC08M096431 | 2.03 | <a href="https://www.genecards.org/cgi-bin/carddisp.pl?gene=RNU6-1172P">https://www.genecards.org/cgi-bin/carddisp.pl?gene=RNU6-1172P</a>             |
| MRPL45P1         | Mitochondrial Ribosomal Protein L45 Pseudogene 1         | Pseudogene     | 5 | GC02M088402 | 2.03 | <a href="https://www.genecards.org/cgi-bin/carddisp.pl?gene=MRPL45P1">https://www.genecards.org/cgi-bin/carddisp.pl?gene=MRPL45P1</a>                 |
| ENSG00000197462  |                                                          | RNA Gene       | 5 | GC07P125917 | 2.03 | <a href="https://www.genecards.org/cgi-bin/carddisp.pl?gene=ENSG00000197462">https://www.genecards.org/cgi-bin/carddisp.pl?gene=ENSG00000197462</a>   |
| ENSG00000235503  |                                                          | RNA Gene       | 5 | GC07P083355 | 2.03 | <a href="https://www.genecards.org/cgi-bin/carddisp.pl?gene=ENSG00000235503">https://www.genecards.org/cgi-bin/carddisp.pl?gene=ENSG00000235503</a>   |
| ENSG00000234034  |                                                          | RNA Gene       | 5 | GC21M022500 | 2.03 | <a href="https://www.genecards.org/cgi-bin/carddisp.pl?gene=ENSG00000234034">https://www.genecards.org/cgi-bin/carddisp.pl?gene=ENSG00000234034</a>   |
| LOC107987158     | Uncharacterized LOC107987158                             | Protein Coding | 5 | GC11M003142 | 2.03 | <a href="https://www.genecards.org/cgi-bin/carddisp.pl?gene=LOC107987158">https://www.genecards.org/cgi-bin/carddisp.pl?gene=LOC107987158</a>         |
| ENSG00000251730  |                                                          | RNA Gene       | 5 | GC03P183454 | 2.03 | <a href="https://www.genecards.org/cgi-bin/carddisp.pl?gene=ENSG00000251730">https://www.genecards.org/cgi-bin/carddisp.pl?gene=ENSG00000251730</a>   |
| ENSG00000254171  |                                                          | RNA Gene       | 5 | GC05P166128 | 2.03 | <a href="https://www.genecards.org/cgi-bin/carddisp.pl?gene=ENSG00000254171">https://www.genecards.org/cgi-bin/carddisp.pl?gene=ENSG00000254171</a>   |
| RPL23AP20        | Ribosomal Protein L23a Pseudogene 20                     | Pseudogene     | 5 | GC01P241916 | 2.03 | <a href="https://www.genecards.org/cgi-bin/carddisp.pl?gene=RPL23AP20">https://www.genecards.org/cgi-bin/carddisp.pl?gene=RPL23AP20</a>               |
| ENSG00000259080  |                                                          | RNA Gene       | 5 | GC02P027583 | 2.03 | <a href="https://www.genecards.org/cgi-bin/carddisp.pl?gene=ENSG00000259080">https://www.genecards.org/cgi-bin/carddisp.pl?gene=ENSG00000259080</a>   |
| lnc-SLC46A3-1    |                                                          | RNA Gene       | 4 | GC13M028701 | 2.03 | <a href="https://www.genecards.org/cgi-bin/carddisp.pl?gene=lnc-SLC46A3-1">https://www.genecards.org/cgi-bin/carddisp.pl?gene=lnc-SLC46A3-1</a>       |
| ENSG00000288092  |                                                          | RNA Gene       | 4 | GC12P103013 | 2.03 | <a href="https://www.genecards.org/cgi-bin/carddisp.pl?gene=ENSG00000288092">https://www.genecards.org/cgi-bin/carddisp.pl?gene=ENSG00000288092</a>   |
| lnc-TSNAX-2      |                                                          | RNA Gene       | 4 | GC01P231693 | 2.03 | <a href="https://www.genecards.org/cgi-bin/carddisp.pl?gene=lnc-TSNAX-2">https://www.genecards.org/cgi-bin/carddisp.pl?gene=lnc-TSNAX-2</a>           |
| SDR42E1P5        | Short Chain Dehydrogenase/Reductase Family 42E, Member 1 | Pseudogene     | 4 | GC02P102412 | 2.03 | <a href="https://www.genecards.org/cgi-bin/carddisp.pl?gene=SDR42E1P5">https://www.genecards.org/cgi-bin/carddisp.pl?gene=SDR42E1P5</a>               |
| lnc-MRGPRG-1     |                                                          | RNA Gene       | 4 | GC11M003146 | 2.03 | <a href="https://www.genecards.org/cgi-bin/carddisp.pl?gene=lnc-MRGPRG-1">https://www.genecards.org/cgi-bin/carddisp.pl?gene=lnc-MRGPRG-1</a>         |
| ENSG00000233983  |                                                          | Pseudogene     | 4 | GC01P099464 | 2.03 | <a href="https://www.genecards.org/cgi-bin/carddisp.pl?gene=ENSG00000233983">https://www.genecards.org/cgi-bin/carddisp.pl?gene=ENSG00000233983</a>   |
| MN309223         |                                                          | RNA Gene       | 4 | GC11P003129 | 2.03 | <a href="https://www.genecards.org/cgi-bin/carddisp.pl?gene=MN309223">https://www.genecards.org/cgi-bin/carddisp.pl?gene=MN309223</a>                 |
| ENSG00000271682  |                                                          | Pseudogene     | 4 | GC03M183462 | 2.03 | <a href="https://www.genecards.org/cgi-bin/carddisp.pl?gene=ENSG00000271682">https://www.genecards.org/cgi-bin/carddisp.pl?gene=ENSG00000271682</a>   |
| ENSG00000287720  |                                                          | RNA Gene       | 3 | GC03P003918 | 2.03 | <a href="https://www.genecards.org/cgi-bin/carddisp.pl?gene=ENSG00000287720">https://www.genecards.org/cgi-bin/carddisp.pl?gene=ENSG00000287720</a>   |
| lnc-SLC22A18-7   |                                                          | RNA Gene       | 3 | GC11P003146 | 2.03 | <a href="https://www.genecards.org/cgi-bin/carddisp.pl?gene=lnc-SLC22A18-7">https://www.genecards.org/cgi-bin/carddisp.pl?gene=lnc-SLC22A18-7</a>     |
| lnc-RASGRP1-1    |                                                          | RNA Gene       | 3 | GC15M038754 | 2.03 | <a href="https://www.genecards.org/cgi-bin/carddisp.pl?gene=lnc-RASGRP1-1">https://www.genecards.org/cgi-bin/carddisp.pl?gene=lnc-RASGRP1-1</a>       |
| lnc-WDR91-4      |                                                          | RNA Gene       | 3 | GC07M135225 | 2.03 | <a href="https://www.genecards.org/cgi-bin/carddisp.pl?gene=lnc-WDR91-4">https://www.genecards.org/cgi-bin/carddisp.pl?gene=lnc-WDR91-4</a>           |
| piR-50443-100    |                                                          | RNA Gene       | 3 | GC13P046157 | 2.03 | <a href="https://www.genecards.org/cgi-bin/carddisp.pl?gene=piR-50443-100">https://www.genecards.org/cgi-bin/carddisp.pl?gene=piR-50443-100</a>       |
| ENSG00000229119  |                                                          | Pseudogene     | 3 | GC05P166383 | 2.03 | <a href="https://www.genecards.org/cgi-bin/carddisp.pl?gene=ENSG00000229119">https://www.genecards.org/cgi-bin/carddisp.pl?gene=ENSG00000229119</a>   |
| ENSG00000225906  |                                                          | Pseudogene     | 3 | GC21P022882 | 2.03 | <a href="https://www.genecards.org/cgi-bin/carddisp.pl?gene=ENSG00000225906">https://www.genecards.org/cgi-bin/carddisp.pl?gene=ENSG00000225906</a>   |
| HSALNG0113292    |                                                          | RNA Gene       | 3 | GC16P086387 | 2.03 | <a href="https://www.genecards.org/cgi-bin/carddisp.pl?gene=HSALNG0113292">https://www.genecards.org/cgi-bin/carddisp.pl?gene=HSALNG0113292</a>       |
| piR-61101-044    |                                                          | RNA Gene       | 3 | GC10M015274 | 2.03 | <a href="https://www.genecards.org/cgi-bin/carddisp.pl?gene=piR-61101-044">https://www.genecards.org/cgi-bin/carddisp.pl?gene=piR-61101-044</a>       |
| ENSG00000231984  |                                                          | Pseudogene     | 3 | GC01P199753 | 2.03 | <a href="https://www.genecards.org/cgi-bin/carddisp.pl?gene=ENSG00000231984">https://www.genecards.org/cgi-bin/carddisp.pl?gene=ENSG00000231984</a>   |
| piR-61861-018    |                                                          | RNA Gene       | 3 | GC22P044789 | 2.03 | <a href="https://www.genecards.org/cgi-bin/carddisp.pl?gene=piR-61861-018">https://www.genecards.org/cgi-bin/carddisp.pl?gene=piR-61861-018</a>       |
| hsa-miR-5096-076 |                                                          | RNA Gene       | 3 | GC07M004224 | 2.03 | <a href="https://www.genecards.org/cgi-bin/carddisp.pl?gene=hsa-miR-5096-076">https://www.genecards.org/cgi-bin/carddisp.pl?gene=hsa-miR-5096-076</a> |
| ENSG00000275383  |                                                          | RNA Gene       | 3 | GC16P068591 | 2.03 | <a href="https://www.genecards.org/cgi-bin/carddisp.pl?gene=ENSG00000275383">https://www.genecards.org/cgi-bin/carddisp.pl?gene=ENSG00000275383</a>   |
| piR-48470        |                                                          | RNA Gene       | 2 | GC06M043135 | 2.03 | <a href="https://www.genecards.org/cgi-bin/carddisp.pl?gene=piR-48470">https://www.genecards.org/cgi-bin/carddisp.pl?gene=piR-48470</a>               |
| RF00026-283      |                                                          | RNA Gene       | 2 | GC13M028704 | 2.03 | <a href="https://www.genecards.org/cgi-bin/carddisp.pl?gene=RF00026-283">https://www.genecards.org/cgi-bin/carddisp.pl?gene=RF00026-283</a>           |
| piR-40638        |                                                          | RNA Gene       | 2 | GC06M042634 | 2.03 | <a href="https://www.genecards.org/cgi-bin/carddisp.pl?gene=piR-40638">https://www.genecards.org/cgi-bin/carddisp.pl?gene=piR-40638</a>               |
| piR-40663        |                                                          | RNA Gene       | 2 | GC06M042635 | 2.03 | <a href="https://www.genecards.org/cgi-bin/carddisp.pl?gene=piR-40663">https://www.genecards.org/cgi-bin/carddisp.pl?gene=piR-40663</a>               |
| piR-49272        |                                                          | RNA Gene       | 2 | GC06M043149 | 2.03 | <a href="https://www.genecards.org/cgi-bin/carddisp.pl?gene=piR-49272">https://www.genecards.org/cgi-bin/carddisp.pl?gene=piR-49272</a>               |
| piR-48794        |                                                          | RNA Gene       | 2 | GC06M043141 | 2.03 | <a href="https://www.genecards.org/cgi-bin/carddisp.pl?gene=piR-48794">https://www.genecards.org/cgi-bin/carddisp.pl?gene=piR-48794</a>               |

|                                           |          |   |             |      |                                                                                                                                               |
|-------------------------------------------|----------|---|-------------|------|-----------------------------------------------------------------------------------------------------------------------------------------------|
| piR-48799-012                             | RNA Gene | 2 | GC10P015269 | 2.03 | <a href="https://www.genecards.org/cgi-bin/carddisp.pl?gene=piR-48799-01">https://www.genecards.org/cgi-bin/carddisp.pl?gene=piR-48799-01</a> |
| piR-49129                                 | RNA Gene | 2 | GC06M043147 | 2.03 | <a href="https://www.genecards.org/cgi-bin/carddisp.pl?gene=piR-49129">https://www.genecards.org/cgi-bin/carddisp.pl?gene=piR-49129</a>       |
| piR-39926                                 | RNA Gene | 2 | GC06M042624 | 2.03 | <a href="https://www.genecards.org/cgi-bin/carddisp.pl?gene=piR-39926">https://www.genecards.org/cgi-bin/carddisp.pl?gene=piR-39926</a>       |
| piR-39858-368                             | RNA Gene | 2 | GC20M016549 | 2.03 | <a href="https://www.genecards.org/cgi-bin/carddisp.pl?gene=piR-39858-36">https://www.genecards.org/cgi-bin/carddisp.pl?gene=piR-39858-36</a> |
| piR-56788                                 | RNA Gene | 2 | GC06M043295 | 2.03 | <a href="https://www.genecards.org/cgi-bin/carddisp.pl?gene=piR-56788">https://www.genecards.org/cgi-bin/carddisp.pl?gene=piR-56788</a>       |
| piR-56842                                 | RNA Gene | 2 | GC06M043296 | 2.03 | <a href="https://www.genecards.org/cgi-bin/carddisp.pl?gene=piR-56842">https://www.genecards.org/cgi-bin/carddisp.pl?gene=piR-56842</a>       |
| piR-32810-118                             | RNA Gene | 2 | GC07M021535 | 2.03 | <a href="https://www.genecards.org/cgi-bin/carddisp.pl?gene=piR-32810-11">https://www.genecards.org/cgi-bin/carddisp.pl?gene=piR-32810-11</a> |
| piR-33024                                 | RNA Gene | 2 | GC06M042499 | 2.03 | <a href="https://www.genecards.org/cgi-bin/carddisp.pl?gene=piR-33024">https://www.genecards.org/cgi-bin/carddisp.pl?gene=piR-33024</a>       |
| piR-32825                                 | RNA Gene | 2 | GC06M042490 | 2.03 | <a href="https://www.genecards.org/cgi-bin/carddisp.pl?gene=piR-32825">https://www.genecards.org/cgi-bin/carddisp.pl?gene=piR-32825</a>       |
| piR-32961                                 | RNA Gene | 2 | GC06M042497 | 2.03 | <a href="https://www.genecards.org/cgi-bin/carddisp.pl?gene=piR-32961">https://www.genecards.org/cgi-bin/carddisp.pl?gene=piR-32961</a>       |
| ENSG00000285529                           | RNA Gene | 2 | GC10P130525 | 2.03 | <a href="https://www.genecards.org/cgi-bin/carddisp.pl?gene=ENSG0000002">https://www.genecards.org/cgi-bin/carddisp.pl?gene=ENSG0000002</a>   |
| piR-48131                                 | RNA Gene | 2 | GC06M043131 | 2.03 | <a href="https://www.genecards.org/cgi-bin/carddisp.pl?gene=piR-48131">https://www.genecards.org/cgi-bin/carddisp.pl?gene=piR-48131</a>       |
| piR-39137                                 | RNA Gene | 2 | GC06M042608 | 2.03 | <a href="https://www.genecards.org/cgi-bin/carddisp.pl?gene=piR-39137">https://www.genecards.org/cgi-bin/carddisp.pl?gene=piR-39137</a>       |
| piR-32153                                 | RNA Gene | 2 | GC06M042468 | 2.03 | <a href="https://www.genecards.org/cgi-bin/carddisp.pl?gene=piR-32153">https://www.genecards.org/cgi-bin/carddisp.pl?gene=piR-32153</a>       |
| piR-49710                                 | RNA Gene | 2 | GC06M043154 | 2.03 | <a href="https://www.genecards.org/cgi-bin/carddisp.pl?gene=piR-49710">https://www.genecards.org/cgi-bin/carddisp.pl?gene=piR-49710</a>       |
| piR-59496                                 | RNA Gene | 2 | GC06M043336 | 2.03 | <a href="https://www.genecards.org/cgi-bin/carddisp.pl?gene=piR-59496">https://www.genecards.org/cgi-bin/carddisp.pl?gene=piR-59496</a>       |
| piR-43106-189                             | RNA Gene | 2 | GC07P135282 | 2.03 | <a href="https://www.genecards.org/cgi-bin/carddisp.pl?gene=piR-43106-18">https://www.genecards.org/cgi-bin/carddisp.pl?gene=piR-43106-18</a> |
| piR-34682                                 | RNA Gene | 2 | GC06M042530 | 2.03 | <a href="https://www.genecards.org/cgi-bin/carddisp.pl?gene=piR-34682">https://www.genecards.org/cgi-bin/carddisp.pl?gene=piR-34682</a>       |
| piR-42506                                 | RNA Gene | 2 | GC06M042681 | 2.03 | <a href="https://www.genecards.org/cgi-bin/carddisp.pl?gene=piR-42506">https://www.genecards.org/cgi-bin/carddisp.pl?gene=piR-42506</a>       |
| piR-42270                                 | RNA Gene | 2 | GC06M042676 | 2.03 | <a href="https://www.genecards.org/cgi-bin/carddisp.pl?gene=piR-42270">https://www.genecards.org/cgi-bin/carddisp.pl?gene=piR-42270</a>       |
| lnc-TRIB1-8                               | RNA Gene | 2 | GC08P125497 | 2.03 | <a href="https://www.genecards.org/cgi-bin/carddisp.pl?gene=lnc-TRIB1-8">https://www.genecards.org/cgi-bin/carddisp.pl?gene=lnc-TRIB1-8</a>   |
| HSALNG0031159                             | RNA Gene | 2 | GC03P183480 | 2.03 | <a href="https://www.genecards.org/cgi-bin/carddisp.pl?gene=HSALNG003">https://www.genecards.org/cgi-bin/carddisp.pl?gene=HSALNG003</a>       |
| HSALNG0032693                             | RNA Gene | 2 | GC04M007714 | 2.03 | <a href="https://www.genecards.org/cgi-bin/carddisp.pl?gene=HSALNG003">https://www.genecards.org/cgi-bin/carddisp.pl?gene=HSALNG003</a>       |
| piR-43926-003                             | RNA Gene | 2 | GC06M043041 | 2.03 | <a href="https://www.genecards.org/cgi-bin/carddisp.pl?gene=piR-43926-00">https://www.genecards.org/cgi-bin/carddisp.pl?gene=piR-43926-00</a> |
| piR-44231                                 | RNA Gene | 2 | GC06M043046 | 2.03 | <a href="https://www.genecards.org/cgi-bin/carddisp.pl?gene=piR-44231">https://www.genecards.org/cgi-bin/carddisp.pl?gene=piR-44231</a>       |
| piR-59890                                 | RNA Gene | 2 | GC06M043338 | 2.03 | <a href="https://www.genecards.org/cgi-bin/carddisp.pl?gene=piR-59890">https://www.genecards.org/cgi-bin/carddisp.pl?gene=piR-59890</a>       |
| piR-35359                                 | RNA Gene | 2 | GC06M042546 | 2.03 | <a href="https://www.genecards.org/cgi-bin/carddisp.pl?gene=piR-35359">https://www.genecards.org/cgi-bin/carddisp.pl?gene=piR-35359</a>       |
| piR-36491                                 | RNA Gene | 2 | GC06M042566 | 2.03 | <a href="https://www.genecards.org/cgi-bin/carddisp.pl?gene=piR-36491">https://www.genecards.org/cgi-bin/carddisp.pl?gene=piR-36491</a>       |
| lnc-XRCC4-4                               | RNA Gene | 2 | GC05P083016 | 2.03 | <a href="https://www.genecards.org/cgi-bin/carddisp.pl?gene=lnc-XRCC4-4">https://www.genecards.org/cgi-bin/carddisp.pl?gene=lnc-XRCC4-4</a>   |
| piR-54702                                 | RNA Gene | 2 | GC06M043257 | 2.03 | <a href="https://www.genecards.org/cgi-bin/carddisp.pl?gene=piR-54702">https://www.genecards.org/cgi-bin/carddisp.pl?gene=piR-54702</a>       |
| LOC105373170 Uncharacterized LOC105373170 | RNA Gene | 2 | GC01M231811 | 2.03 | <a href="https://www.genecards.org/cgi-bin/carddisp.pl?gene=LOC1053731">https://www.genecards.org/cgi-bin/carddisp.pl?gene=LOC1053731</a>     |
| piR-45773                                 | RNA Gene | 2 | GC06M043079 | 2.03 | <a href="https://www.genecards.org/cgi-bin/carddisp.pl?gene=piR-45773">https://www.genecards.org/cgi-bin/carddisp.pl?gene=piR-45773</a>       |
| piR-55199                                 | RNA Gene | 2 | GC06M043268 | 2.03 | <a href="https://www.genecards.org/cgi-bin/carddisp.pl?gene=piR-55199">https://www.genecards.org/cgi-bin/carddisp.pl?gene=piR-55199</a>       |
| piR-46362                                 | RNA Gene | 2 | GC06M043091 | 2.03 | <a href="https://www.genecards.org/cgi-bin/carddisp.pl?gene=piR-46362">https://www.genecards.org/cgi-bin/carddisp.pl?gene=piR-46362</a>       |
| NONHSAG018421.2                           | RNA Gene | 2 | GC16P004337 | 2.03 | <a href="https://www.genecards.org/cgi-bin/carddisp.pl?gene=NONHSAG0">https://www.genecards.org/cgi-bin/carddisp.pl?gene=NONHSAG0</a>         |
| lnc-KLHL24-6                              | RNA Gene | 2 | GC03P183484 | 2.03 | <a href="https://www.genecards.org/cgi-bin/carddisp.pl?gene=lnc-KLHL24-">https://www.genecards.org/cgi-bin/carddisp.pl?gene=lnc-KLHL24-</a>   |
| piR-44286                                 | RNA Gene | 2 | GC06M043047 | 2.03 | <a href="https://www.genecards.org/cgi-bin/carddisp.pl?gene=piR-44286">https://www.genecards.org/cgi-bin/carddisp.pl?gene=piR-44286</a>       |
| piR-37903                                 | RNA Gene | 2 | GC06M042587 | 2.03 | <a href="https://www.genecards.org/cgi-bin/carddisp.pl?gene=piR-37903">https://www.genecards.org/cgi-bin/carddisp.pl?gene=piR-37903</a>       |
| piR-37780                                 | RNA Gene | 2 | GC06M042585 | 2.03 | <a href="https://www.genecards.org/cgi-bin/carddisp.pl?gene=piR-37780">https://www.genecards.org/cgi-bin/carddisp.pl?gene=piR-37780</a>       |

|                 |                                                     |                   |    |             |      |                                                                                                                                               |
|-----------------|-----------------------------------------------------|-------------------|----|-------------|------|-----------------------------------------------------------------------------------------------------------------------------------------------|
| piR-45939       |                                                     | RNA Gene          | 2  | GC06M043081 | 2.03 | <a href="https://www.genecards.org/cgi-bin/carddisp.pl?gene=piR-45939">https://www.genecards.org/cgi-bin/carddisp.pl?gene=piR-45939</a>       |
| LOC105373943    | Uncharacterized LOC105373943                        | RNA Gene          | 2  | GC02M235676 | 2.03 | <a href="https://www.genecards.org/cgi-bin/carddisp.pl?gene=LOC1053739">https://www.genecards.org/cgi-bin/carddisp.pl?gene=LOC1053739</a>     |
| piR-61711       |                                                     | RNA Gene          | 2  | GC06M043376 | 2.03 | <a href="https://www.genecards.org/cgi-bin/carddisp.pl?gene=piR-61711">https://www.genecards.org/cgi-bin/carddisp.pl?gene=piR-61711</a>       |
| NONHSAG013110.2 |                                                     | RNA Gene          | 2  | GC13P028704 | 2.03 | <a href="https://www.genecards.org/cgi-bin/carddisp.pl?gene=NONHSAG0">https://www.genecards.org/cgi-bin/carddisp.pl?gene=NONHSAG0</a>         |
| LOC105379051    | Uncharacterized LOC105379051                        | RNA Gene          | 2  | GC05M082913 | 2.03 | <a href="https://www.genecards.org/cgi-bin/carddisp.pl?gene=LOC1053790">https://www.genecards.org/cgi-bin/carddisp.pl?gene=LOC1053790</a>     |
| RF00017-1416    |                                                     | RNA Gene          | 2  | GC13P046128 | 2.03 | <a href="https://www.genecards.org/cgi-bin/carddisp.pl?gene=RF00017-141">https://www.genecards.org/cgi-bin/carddisp.pl?gene=RF00017-141</a>   |
| LOC107986000    | Uncharacterized LOC107986000                        | RNA Gene          | 2  | GC02P235730 | 2.03 | <a href="https://www.genecards.org/cgi-bin/carddisp.pl?gene=LOC1079860">https://www.genecards.org/cgi-bin/carddisp.pl?gene=LOC1079860</a>     |
| ENSG00000258506 |                                                     | Pseudogene        | 2  | GC14P084951 | 2.03 | <a href="https://www.genecards.org/cgi-bin/carddisp.pl?gene=ENSG000002">https://www.genecards.org/cgi-bin/carddisp.pl?gene=ENSG000002</a>     |
| piR-30178       |                                                     | RNA Gene          | 2  | GC06M042432 | 2.03 | <a href="https://www.genecards.org/cgi-bin/carddisp.pl?gene=piR-30178">https://www.genecards.org/cgi-bin/carddisp.pl?gene=piR-30178</a>       |
| piR-55631       |                                                     | RNA Gene          | 2  | GC06M043276 | 2.03 | <a href="https://www.genecards.org/cgi-bin/carddisp.pl?gene=piR-55631">https://www.genecards.org/cgi-bin/carddisp.pl?gene=piR-55631</a>       |
| piR-30153       |                                                     | RNA Gene          | 2  | GC06M042431 | 2.03 | <a href="https://www.genecards.org/cgi-bin/carddisp.pl?gene=piR-30153">https://www.genecards.org/cgi-bin/carddisp.pl?gene=piR-30153</a>       |
| piR-47596       |                                                     | RNA Gene          | 2  | GC06M043104 | 2.03 | <a href="https://www.genecards.org/cgi-bin/carddisp.pl?gene=piR-47596">https://www.genecards.org/cgi-bin/carddisp.pl?gene=piR-47596</a>       |
| piR-30883       |                                                     | RNA Gene          | 2  | GC06M042449 | 2.03 | <a href="https://www.genecards.org/cgi-bin/carddisp.pl?gene=piR-30883">https://www.genecards.org/cgi-bin/carddisp.pl?gene=piR-30883</a>       |
| HSALNG0014027   |                                                     | RNA Gene          | 2  | GC02M031425 | 2.03 | <a href="https://www.genecards.org/cgi-bin/carddisp.pl?gene=HSALNG001">https://www.genecards.org/cgi-bin/carddisp.pl?gene=HSALNG001</a>       |
| piR-36047       |                                                     | RNA Gene          | 2  | GC06M042559 | 2.03 | <a href="https://www.genecards.org/cgi-bin/carddisp.pl?gene=piR-36047">https://www.genecards.org/cgi-bin/carddisp.pl?gene=piR-36047</a>       |
| piR-55036-040   |                                                     | RNA Gene          | 2  | GC02P031489 | 2.03 | <a href="https://www.genecards.org/cgi-bin/carddisp.pl?gene=piR-55036-04">https://www.genecards.org/cgi-bin/carddisp.pl?gene=piR-55036-04</a> |
| piR-46640       |                                                     | RNA Gene          | 2  | GC06M043094 | 2.03 | <a href="https://www.genecards.org/cgi-bin/carddisp.pl?gene=piR-46640">https://www.genecards.org/cgi-bin/carddisp.pl?gene=piR-46640</a>       |
| ENSG00000276067 |                                                     | Pseudogene        | 2  | GC07M135246 | 2.03 | <a href="https://www.genecards.org/cgi-bin/carddisp.pl?gene=ENSG000002">https://www.genecards.org/cgi-bin/carddisp.pl?gene=ENSG000002</a>     |
| ENSG00000271078 |                                                     | Pseudogene        | 2  | GC15M032251 | 2.03 | <a href="https://www.genecards.org/cgi-bin/carddisp.pl?gene=ENSG000002">https://www.genecards.org/cgi-bin/carddisp.pl?gene=ENSG000002</a>     |
| piR-31534-137   |                                                     | RNA Gene          | 2  | GC13M028707 | 2.03 | <a href="https://www.genecards.org/cgi-bin/carddisp.pl?gene=piR-31534-13">https://www.genecards.org/cgi-bin/carddisp.pl?gene=piR-31534-13</a> |
| ENSG00000279912 |                                                     | Uncategorized     | 2  | GC15P032182 | 2.03 | <a href="https://www.genecards.org/cgi-bin/carddisp.pl?gene=ENSG000002">https://www.genecards.org/cgi-bin/carddisp.pl?gene=ENSG000002</a>     |
| ENSG00000280306 |                                                     | Uncategorized     | 2  | GC16P020487 | 2.03 | <a href="https://www.genecards.org/cgi-bin/carddisp.pl?gene=ENSG000002">https://www.genecards.org/cgi-bin/carddisp.pl?gene=ENSG000002</a>     |
| ENSG00000219736 |                                                     | Pseudogene        | 1  | GC06M074850 | 2.03 | <a href="https://www.genecards.org/cgi-bin/carddisp.pl?gene=ENSG000002">https://www.genecards.org/cgi-bin/carddisp.pl?gene=ENSG000002</a>     |
| ENSG00000220748 |                                                     | Pseudogene        | 1  | GC06P023972 | 2.03 | <a href="https://www.genecards.org/cgi-bin/carddisp.pl?gene=ENSG000002">https://www.genecards.org/cgi-bin/carddisp.pl?gene=ENSG000002</a>     |
| LOC102724253    | Uncharacterized LOC102724253                        | RNA Gene          | 1  | GC15M038755 | 2.03 | <a href="https://www.genecards.org/cgi-bin/carddisp.pl?gene=LOC1027242">https://www.genecards.org/cgi-bin/carddisp.pl?gene=LOC1027242</a>     |
| LOC107984123    | Uncharacterized LOC107984123                        | RNA Gene          | 1  | GC07M135263 | 2.03 | <a href="https://www.genecards.org/cgi-bin/carddisp.pl?gene=LOC1079841">https://www.genecards.org/cgi-bin/carddisp.pl?gene=LOC1079841</a>     |
| LOC105377705    | Uncharacterized LOC105377705                        | RNA Gene          | 1  | GC05M166230 | 2.03 | <a href="https://www.genecards.org/cgi-bin/carddisp.pl?gene=LOC1053777">https://www.genecards.org/cgi-bin/carddisp.pl?gene=LOC1053777</a>     |
| RPL23A          | Ribosomal Protein L23a                              | Protein Coding    | 41 | GC17P028719 | 2.03 | <a href="https://www.genecards.org/cgi-bin/carddisp.pl?gene=RPL23A">https://www.genecards.org/cgi-bin/carddisp.pl?gene=RPL23A</a>             |
| RUVBL1          | RuvB Like AAA ATPase 1                              | Protein Coding    | 44 | GC03M128064 | 2.02 | <a href="https://www.genecards.org/cgi-bin/carddisp.pl?gene=RUVBL1">https://www.genecards.org/cgi-bin/carddisp.pl?gene=RUVBL1</a>             |
| IBTK            | Inhibitor Of Bruton Tyrosine Kinase                 | Protein Coding    | 39 | GC06M082169 | 2.02 | <a href="https://www.genecards.org/cgi-bin/carddisp.pl?gene=IBTK">https://www.genecards.org/cgi-bin/carddisp.pl?gene=IBTK</a>                 |
| AUP1            | AUP1 Lipid Droplet Regulating VLDL Assembly Fact    | Protein Coding    | 37 | GC02M074526 | 2.02 | <a href="https://www.genecards.org/cgi-bin/carddisp.pl?gene=AUP1">https://www.genecards.org/cgi-bin/carddisp.pl?gene=AUP1</a>                 |
| ILF3            | Interleukin Enhancer Binding Factor 3               | Protein Coding    | 38 | GC19P010625 | 2.01 | <a href="https://www.genecards.org/cgi-bin/carddisp.pl?gene=ILF3">https://www.genecards.org/cgi-bin/carddisp.pl?gene=ILF3</a>                 |
| ARPC2           | Actin Related Protein 2/3 Complex Subunit 2         | Protein Coding    | 43 | GC02P218217 | 1.99 | <a href="https://www.genecards.org/cgi-bin/carddisp.pl?gene=ARPC2">https://www.genecards.org/cgi-bin/carddisp.pl?gene=ARPC2</a>               |
| RRBP1           | Ribosome Binding Protein 1                          | Protein Coding    | 39 | GC20M017613 | 1.99 | <a href="https://www.genecards.org/cgi-bin/carddisp.pl?gene=RRBP1">https://www.genecards.org/cgi-bin/carddisp.pl?gene=RRBP1</a>               |
| RTRAF           | RNA Transcription, Translation And Transport Factor | Protein Coding    | 28 | GC14P051992 | 1.99 | <a href="https://www.genecards.org/cgi-bin/carddisp.pl?gene=RTRAF">https://www.genecards.org/cgi-bin/carddisp.pl?gene=RTRAF</a>               |
| EIF4A1          | Eukaryotic Translation Initiation Factor 4A1        | Protein Coding    | 44 | GC17P007572 | 1.99 | <a href="https://www.genecards.org/cgi-bin/carddisp.pl?gene=EIF4A1">https://www.genecards.org/cgi-bin/carddisp.pl?gene=EIF4A1</a>             |
| SRSF4           | Serine And Arginine Rich Splicing Factor 4          | Protein Coding    | 38 | GC01M029147 | 1.98 | <a href="https://www.genecards.org/cgi-bin/carddisp.pl?gene=SRSF4">https://www.genecards.org/cgi-bin/carddisp.pl?gene=SRSF4</a>               |
| SUGP1           | SURP And G-Patch Domain Containing 1                | Protein Coding    | 35 | GC19M019276 | 1.98 | <a href="https://www.genecards.org/cgi-bin/carddisp.pl?gene=SUGP1">https://www.genecards.org/cgi-bin/carddisp.pl?gene=SUGP1</a>               |
| LOC110366354    | CYP3A4 5' Regulatory Region                         | Biological Region | 1  | GC07P099784 | 1.97 | <a href="https://www.genecards.org/cgi-bin/carddisp.pl?gene=LOC1103663">https://www.genecards.org/cgi-bin/carddisp.pl?gene=LOC1103663</a>     |



|          |                                                      |                |    |             |                                                                                                                                            |
|----------|------------------------------------------------------|----------------|----|-------------|--------------------------------------------------------------------------------------------------------------------------------------------|
| ENHO     | Energy Homeostasis Associated                        | Protein Coding | 30 | GC09M034516 | 1.97 <a href="https://www.genecards.org/cgi-bin/carddisp.pl?gene=ENHO">https://www.genecards.org/cgi-bin/carddisp.pl?gene=ENHO</a>         |
| AHSA1    | Activator Of HSP90 ATPase Activity 1                 | Protein Coding | 39 | GC14P077457 | 1.96 <a href="https://www.genecards.org/cgi-bin/carddisp.pl?gene=AHSA1">https://www.genecards.org/cgi-bin/carddisp.pl?gene=AHSA1</a>       |
| RNF114   | Ring Finger Protein 114                              | Protein Coding | 40 | GC20P049936 | 1.96 <a href="https://www.genecards.org/cgi-bin/carddisp.pl?gene=RNF114">https://www.genecards.org/cgi-bin/carddisp.pl?gene=RNF114</a>     |
| CTPS1    | CTP Synthase 1                                       | Protein Coding | 44 | GC01P040979 | 1.96 <a href="https://www.genecards.org/cgi-bin/carddisp.pl?gene=CTPS1">https://www.genecards.org/cgi-bin/carddisp.pl?gene=CTPS1</a>       |
| SEC16A   | SEC16 Homolog A, Endoplasmic Reticulum Export Fa     | Protein Coding | 36 | GC09M136440 | 1.96 <a href="https://www.genecards.org/cgi-bin/carddisp.pl?gene=SEC16A">https://www.genecards.org/cgi-bin/carddisp.pl?gene=SEC16A</a>     |
| RPS8     | Ribosomal Protein S8                                 | Protein Coding | 39 | GC01P044775 | 1.95 <a href="https://www.genecards.org/cgi-bin/carddisp.pl?gene=RPS8">https://www.genecards.org/cgi-bin/carddisp.pl?gene=RPS8</a>         |
| TRIM33   | Tripartite Motif Containing 33                       | Protein Coding | 44 | GC01M114392 | 1.95 <a href="https://www.genecards.org/cgi-bin/carddisp.pl?gene=TRIM33">https://www.genecards.org/cgi-bin/carddisp.pl?gene=TRIM33</a>     |
| TMSB4X   | Thymosin Beta 4 X-Linked                             | Protein Coding | 40 | GC0XP012975 | 1.95 <a href="https://www.genecards.org/cgi-bin/carddisp.pl?gene=TMSB4X">https://www.genecards.org/cgi-bin/carddisp.pl?gene=TMSB4X</a>     |
| SRRM1    | Serine And Arginine Repetitive Matrix 1              | Protein Coding | 37 | GC01P024631 | 1.93 <a href="https://www.genecards.org/cgi-bin/carddisp.pl?gene=SRRM1">https://www.genecards.org/cgi-bin/carddisp.pl?gene=SRRM1</a>       |
| DUSP26   | Dual Specificity Phosphatase 26                      | Protein Coding | 36 | GC08M033591 | 1.93 <a href="https://www.genecards.org/cgi-bin/carddisp.pl?gene=DUSP26">https://www.genecards.org/cgi-bin/carddisp.pl?gene=DUSP26</a>     |
| EIF3E    | Eukaryotic Translation Initiation Factor 3 Subunit E | Protein Coding | 38 | GC08M108201 | 1.93 <a href="https://www.genecards.org/cgi-bin/carddisp.pl?gene=EIF3E">https://www.genecards.org/cgi-bin/carddisp.pl?gene=EIF3E</a>       |
| DDX17    | DEAD-Box Helicase 17                                 | Protein Coding | 40 | GC22M038483 | 1.92 <a href="https://www.genecards.org/cgi-bin/carddisp.pl?gene=DDX17">https://www.genecards.org/cgi-bin/carddisp.pl?gene=DDX17</a>       |
| CCT8     | Chaperonin Containing TCP1 Subunit 8                 | Protein Coding | 37 | GC21M029055 | 1.91 <a href="https://www.genecards.org/cgi-bin/carddisp.pl?gene=CCT8">https://www.genecards.org/cgi-bin/carddisp.pl?gene=CCT8</a>         |
| CAMKK2   | Calcium/Calmodulin Dependent Protein Kinase Kinase   | Protein Coding | 45 | GC12M121309 | 1.91 <a href="https://www.genecards.org/cgi-bin/carddisp.pl?gene=CAMKK2">https://www.genecards.org/cgi-bin/carddisp.pl?gene=CAMKK2</a>     |
| EDC4     | Enhancer Of mRNA Decapping 4                         | Protein Coding | 38 | GC16P067873 | 1.9 <a href="https://www.genecards.org/cgi-bin/carddisp.pl?gene=EDC4">https://www.genecards.org/cgi-bin/carddisp.pl?gene=EDC4</a>          |
| EIF3B    | Eukaryotic Translation Initiation Factor 3 Subunit B | Protein Coding | 38 | GC07P002354 | 1.9 <a href="https://www.genecards.org/cgi-bin/carddisp.pl?gene=EIF3B">https://www.genecards.org/cgi-bin/carddisp.pl?gene=EIF3B</a>        |
| HKDC1    | Hexokinase Domain Containing 1                       | Protein Coding | 40 | GC10P069220 | 1.9 <a href="https://www.genecards.org/cgi-bin/carddisp.pl?gene=HKDC1">https://www.genecards.org/cgi-bin/carddisp.pl?gene=HKDC1</a>        |
| CKAP4    | Cytoskeleton Associated Protein 4                    | Protein Coding | 37 | GC12M106237 | 1.9 <a href="https://www.genecards.org/cgi-bin/carddisp.pl?gene=CKAP4">https://www.genecards.org/cgi-bin/carddisp.pl?gene=CKAP4</a>        |
| HNRNPUL1 | Heterogeneous Nuclear Ribonucleoprotein U Like 1     | Protein Coding | 37 | GC19P041262 | 1.9 <a href="https://www.genecards.org/cgi-bin/carddisp.pl?gene=HNRNPUL1">https://www.genecards.org/cgi-bin/carddisp.pl?gene=HNRNPUL1</a>  |
| MAPK13   | Mitogen-Activated Protein Kinase 13                  | Protein Coding | 48 | GC06P047452 | 1.9 <a href="https://www.genecards.org/cgi-bin/carddisp.pl?gene=MAPK13">https://www.genecards.org/cgi-bin/carddisp.pl?gene=MAPK13</a>      |
| EIF3F    | Eukaryotic Translation Initiation Factor 3 Subunit F | Protein Coding | 42 | GC11P007966 | 1.89 <a href="https://www.genecards.org/cgi-bin/carddisp.pl?gene=EIF3F">https://www.genecards.org/cgi-bin/carddisp.pl?gene=EIF3F</a>       |
| RBM14    | RNA Binding Motif Protein 14                         | Protein Coding | 36 | GC11P066631 | 1.89 <a href="https://www.genecards.org/cgi-bin/carddisp.pl?gene=RBM14">https://www.genecards.org/cgi-bin/carddisp.pl?gene=RBM14</a>       |
| UBE2D3   | Ubiquitin Conjugating Enzyme E2 D3                   | Protein Coding | 47 | GC04M102794 | 1.88 <a href="https://www.genecards.org/cgi-bin/carddisp.pl?gene=UBE2D3">https://www.genecards.org/cgi-bin/carddisp.pl?gene=UBE2D3</a>     |
| FARSA    | Phenylalanyl-TRNA Synthetase Subunit Alpha           | Protein Coding | 40 | GC19M012922 | 1.88 <a href="https://www.genecards.org/cgi-bin/carddisp.pl?gene=FARSA">https://www.genecards.org/cgi-bin/carddisp.pl?gene=FARSA</a>       |
| HSD17B11 | Hydroxysteroid 17-Beta Dehydrogenase 11              | Protein Coding | 40 | GC04M087336 | 1.87 <a href="https://www.genecards.org/cgi-bin/carddisp.pl?gene=HSD17B11">https://www.genecards.org/cgi-bin/carddisp.pl?gene=HSD17B11</a> |
| PDIA4    | Protein Disulfide Isomerase Family A Member 4        | Protein Coding | 42 | GC07M149003 | 1.86 <a href="https://www.genecards.org/cgi-bin/carddisp.pl?gene=PDIA4">https://www.genecards.org/cgi-bin/carddisp.pl?gene=PDIA4</a>       |
| PGAM5    | PGAM Family Member 5, Mitochondrial Serine/Threo     | Protein Coding | 34 | GC12P132710 | 1.86 <a href="https://www.genecards.org/cgi-bin/carddisp.pl?gene=PGAM5">https://www.genecards.org/cgi-bin/carddisp.pl?gene=PGAM5</a>       |
| FAM3A    | FAM3 Metabolism Regulating Signaling Molecule A      | Protein Coding | 35 | GC0XM154506 | 1.85 <a href="https://www.genecards.org/cgi-bin/carddisp.pl?gene=FAM3A">https://www.genecards.org/cgi-bin/carddisp.pl?gene=FAM3A</a>       |
| SLC25A48 | Solute Carrier Family 25 Member 48                   | Protein Coding | 32 | GC05P135579 | 1.84 <a href="https://www.genecards.org/cgi-bin/carddisp.pl?gene=SLC25A48">https://www.genecards.org/cgi-bin/carddisp.pl?gene=SLC25A48</a> |
| PKNOX1   | PBX/Knotted 1 Homeobox 1                             | Protein Coding | 40 | GC21P042974 | 1.84 <a href="https://www.genecards.org/cgi-bin/carddisp.pl?gene=PKNOX1">https://www.genecards.org/cgi-bin/carddisp.pl?gene=PKNOX1</a>     |
| TMEM97   | Transmembrane Protein 97                             | Protein Coding | 35 | GC17P028319 | 1.83 <a href="https://www.genecards.org/cgi-bin/carddisp.pl?gene=TMEM97">https://www.genecards.org/cgi-bin/carddisp.pl?gene=TMEM97</a>     |
| PABPC4   | Poly(A) Binding Protein Cytoplasmic 4                | Protein Coding | 41 | GC01M039560 | 1.83 <a href="https://www.genecards.org/cgi-bin/carddisp.pl?gene=PABPC4">https://www.genecards.org/cgi-bin/carddisp.pl?gene=PABPC4</a>     |
| SF3B3    | Splicing Factor 3b Subunit 3                         | Protein Coding | 39 | GC16P070523 | 1.83 <a href="https://www.genecards.org/cgi-bin/carddisp.pl?gene=SF3B3">https://www.genecards.org/cgi-bin/carddisp.pl?gene=SF3B3</a>       |
| C1QTNF9  | C1q And TNF Related 9                                | Protein Coding | 33 | GC13P024307 | 1.82 <a href="https://www.genecards.org/cgi-bin/carddisp.pl?gene=C1QTNF9">https://www.genecards.org/cgi-bin/carddisp.pl?gene=C1QTNF9</a>   |
| MIR190B  | MicroRNA 190b                                        | RNA Gene       | 14 | GC01M154193 | 1.8 <a href="https://www.genecards.org/cgi-bin/carddisp.pl?gene=MIR190B">https://www.genecards.org/cgi-bin/carddisp.pl?gene=MIR190B</a>    |
| CAND1    | Cullin Associated And Neddylation Dissociated 1      | Protein Coding | 37 | GC12P067270 | 1.8 <a href="https://www.genecards.org/cgi-bin/carddisp.pl?gene=CAND1">https://www.genecards.org/cgi-bin/carddisp.pl?gene=CAND1</a>        |
| MYBBP1A  | MYB Binding Protein 1a                               | Protein Coding | 39 | GC17M004538 | 1.79 <a href="https://www.genecards.org/cgi-bin/carddisp.pl?gene=MYBBP1A">https://www.genecards.org/cgi-bin/carddisp.pl?gene=MYBBP1A</a>   |
| USP48    | Ubiquitin Specific Peptidase 48                      | Protein Coding | 39 | GC01M021678 | 1.79 <a href="https://www.genecards.org/cgi-bin/carddisp.pl?gene=USP48">https://www.genecards.org/cgi-bin/carddisp.pl?gene=USP48</a>       |
| TMC4     | Transmembrane Channel Like 4                         | Protein Coding | 35 | GC19M054160 | 1.79 <a href="https://www.genecards.org/cgi-bin/carddisp.pl?gene=TMC4">https://www.genecards.org/cgi-bin/carddisp.pl?gene=TMC4</a>         |

|          |                                                   |                |    |             |                                                                                                                                           |
|----------|---------------------------------------------------|----------------|----|-------------|-------------------------------------------------------------------------------------------------------------------------------------------|
| TXNL1    | Thioredoxin Like 1                                | Protein Coding | 39 | GC18M056597 | 1.78 <a href="https://www.genecards.org/cgi-bin/carddisp.pl?gene=TXNL1">https://www.genecards.org/cgi-bin/carddisp.pl?gene=TXNL1</a>      |
| HNRNPL   | Heterogeneous Nuclear Ribonucleoprotein L         | Protein Coding | 39 | GC19M038836 | 1.78 <a href="https://www.genecards.org/cgi-bin/carddisp.pl?gene=HNRNPL">https://www.genecards.org/cgi-bin/carddisp.pl?gene=HNRNPL</a>    |
| DEFA1    | Defensin Alpha 1                                  | Protein Coding | 40 | GC08M006977 | 1.78 <a href="https://www.genecards.org/cgi-bin/carddisp.pl?gene=DEFA1">https://www.genecards.org/cgi-bin/carddisp.pl?gene=DEFA1</a>      |
| EIF4A2   | Eukaryotic Translation Initiation Factor 4A2      | Protein Coding | 45 | GC03P186783 | 1.78 <a href="https://www.genecards.org/cgi-bin/carddisp.pl?gene=EIF4A2">https://www.genecards.org/cgi-bin/carddisp.pl?gene=EIF4A2</a>    |
| LAMP3    | Lysosomal Associated Membrane Protein 3           | Protein Coding | 39 | GC03M183122 | 1.77 <a href="https://www.genecards.org/cgi-bin/carddisp.pl?gene=LAMP3">https://www.genecards.org/cgi-bin/carddisp.pl?gene=LAMP3</a>      |
| DHX15    | DEAH-Box Helicase 15                              | Protein Coding | 38 | GC04M024519 | 1.76 <a href="https://www.genecards.org/cgi-bin/carddisp.pl?gene=DHX15">https://www.genecards.org/cgi-bin/carddisp.pl?gene=DHX15</a>      |
| SUB1     | SUB1 Regulator Of Transcription                   | Protein Coding | 37 | GC05P032533 | 1.76 <a href="https://www.genecards.org/cgi-bin/carddisp.pl?gene=SUB1">https://www.genecards.org/cgi-bin/carddisp.pl?gene=SUB1</a>        |
| TMBIM6   | Transmembrane BAX Inhibitor Motif Containing 6    | Protein Coding | 36 | GC12P049707 | 1.76 <a href="https://www.genecards.org/cgi-bin/carddisp.pl?gene=TMBIM6">https://www.genecards.org/cgi-bin/carddisp.pl?gene=TMBIM6</a>    |
| ILF2     | Interleukin Enhancer Binding Factor 2             | Protein Coding | 38 | GC01M153661 | 1.74 <a href="https://www.genecards.org/cgi-bin/carddisp.pl?gene=ILF2">https://www.genecards.org/cgi-bin/carddisp.pl?gene=ILF2</a>        |
| SRRM2    | Serine/Arginine Repetitive Matrix 2               | Protein Coding | 33 | GC16P004234 | 1.73 <a href="https://www.genecards.org/cgi-bin/carddisp.pl?gene=SRRM2">https://www.genecards.org/cgi-bin/carddisp.pl?gene=SRRM2</a>      |
| FAM3B    | FAM3 Metabolism Regulating Signaling Molecule B   | Protein Coding | 39 | GC21P041304 | 1.73 <a href="https://www.genecards.org/cgi-bin/carddisp.pl?gene=FAM3B">https://www.genecards.org/cgi-bin/carddisp.pl?gene=FAM3B</a>      |
| RTCB     | RNA 2',3'-Cyclic Phosphate And 5'-OH Ligase       | Protein Coding | 35 | GC22M032387 | 1.72 <a href="https://www.genecards.org/cgi-bin/carddisp.pl?gene=RTCB">https://www.genecards.org/cgi-bin/carddisp.pl?gene=RTCB</a>        |
| OPRD1    | Opioid Receptor Delta 1                           | Protein Coding | 44 | GC01P028812 | 1.71 <a href="https://www.genecards.org/cgi-bin/carddisp.pl?gene=OPRD1">https://www.genecards.org/cgi-bin/carddisp.pl?gene=OPRD1</a>      |
| GLT8D2   | Glycosyltransferase 8 Domain Containing 2         | Protein Coding | 36 | GC12M103988 | 1.71 <a href="https://www.genecards.org/cgi-bin/carddisp.pl?gene=GLT8D2">https://www.genecards.org/cgi-bin/carddisp.pl?gene=GLT8D2</a>    |
| EBNA1BP2 | EBNA1 Binding Protein 2                           | Protein Coding | 37 | GC01M043165 | 1.7 <a href="https://www.genecards.org/cgi-bin/carddisp.pl?gene=EBNA1BP2">https://www.genecards.org/cgi-bin/carddisp.pl?gene=EBNA1BP2</a> |
| LATS2    | Large Tumor Suppressor Kinase 2                   | Protein Coding | 44 | GC13M020973 | 1.7 <a href="https://www.genecards.org/cgi-bin/carddisp.pl?gene=LATS2">https://www.genecards.org/cgi-bin/carddisp.pl?gene=LATS2</a>       |
| GGT5     | Gamma-Glutamyltransferase 5                       | Protein Coding | 39 | GC22M024219 | 1.68 <a href="https://www.genecards.org/cgi-bin/carddisp.pl?gene=GGT5">https://www.genecards.org/cgi-bin/carddisp.pl?gene=GGT5</a>        |
| HMCEs    | 5-Hydroxymethylcytosine Binding, ES Cell Specific | Protein Coding | 32 | GC03P129278 | 1.63 <a href="https://www.genecards.org/cgi-bin/carddisp.pl?gene=HMCEs">https://www.genecards.org/cgi-bin/carddisp.pl?gene=HMCEs</a>      |
| SMOC2    | SPARC Related Modular Calcium Binding 2           | Protein Coding | 41 | GC06P168441 | 1.62 <a href="https://www.genecards.org/cgi-bin/carddisp.pl?gene=SMOC2">https://www.genecards.org/cgi-bin/carddisp.pl?gene=SMOC2</a>      |
| PHF2     | PHD Finger Protein 2                              | Protein Coding | 39 | GC09P093576 | 1.6 <a href="https://www.genecards.org/cgi-bin/carddisp.pl?gene=PHF2">https://www.genecards.org/cgi-bin/carddisp.pl?gene=PHF2</a>         |
| SNRNP40  | Small Nuclear Ribonucleoprotein U5 Subunit 40     | Protein Coding | 36 | GC01M031259 | 1.6 <a href="https://www.genecards.org/cgi-bin/carddisp.pl?gene=SNRNP40">https://www.genecards.org/cgi-bin/carddisp.pl?gene=SNRNP40</a>   |
| FAT1     | FAT Atypical Cadherin 1                           | Protein Coding | 39 | GC04M186587 | 1.59 <a href="https://www.genecards.org/cgi-bin/carddisp.pl?gene=FAT1">https://www.genecards.org/cgi-bin/carddisp.pl?gene=FAT1</a>        |
| DDX46    | DEAD-Box Helicase 46                              | Protein Coding | 39 | GC05P134758 | 1.56 <a href="https://www.genecards.org/cgi-bin/carddisp.pl?gene=DDX46">https://www.genecards.org/cgi-bin/carddisp.pl?gene=DDX46</a>      |
| PHF5A    | PHD Finger Protein 5A                             | Protein Coding | 36 | GC22M041459 | 1.56 <a href="https://www.genecards.org/cgi-bin/carddisp.pl?gene=PHF5A">https://www.genecards.org/cgi-bin/carddisp.pl?gene=PHF5A</a>      |
| KDM4B    | Lysine Demethylase 4B                             | Protein Coding | 43 | GC19P004969 | 1.56 <a href="https://www.genecards.org/cgi-bin/carddisp.pl?gene=KDM4B">https://www.genecards.org/cgi-bin/carddisp.pl?gene=KDM4B</a>      |
| ARPC4    | Actin Related Protein 2/3 Complex Subunit 4       | Protein Coding | 38 | GC03P009792 | 1.55 <a href="https://www.genecards.org/cgi-bin/carddisp.pl?gene=ARPC4">https://www.genecards.org/cgi-bin/carddisp.pl?gene=ARPC4</a>      |
| NMBR     | Neuromedin B Receptor                             | Protein Coding | 42 | GC06M142059 | 1.53 <a href="https://www.genecards.org/cgi-bin/carddisp.pl?gene=NMBR">https://www.genecards.org/cgi-bin/carddisp.pl?gene=NMBR</a>        |
| UBXN1    | UBX Domain Protein 1                              | Protein Coding | 36 | GC11M063437 | 1.53 <a href="https://www.genecards.org/cgi-bin/carddisp.pl?gene=UBXN1">https://www.genecards.org/cgi-bin/carddisp.pl?gene=UBXN1</a>      |
| SLC2A8   | Solute Carrier Family 2 Member 8                  | Protein Coding | 39 | GC09P127398 | 1.53 <a href="https://www.genecards.org/cgi-bin/carddisp.pl?gene=SLC2A8">https://www.genecards.org/cgi-bin/carddisp.pl?gene=SLC2A8</a>    |
| RGS4     | Regulator Of G Protein Signaling 4                | Protein Coding | 43 | GC01P163038 | 1.5 <a href="https://www.genecards.org/cgi-bin/carddisp.pl?gene=RGS4">https://www.genecards.org/cgi-bin/carddisp.pl?gene=RGS4</a>         |
| FAIM     | Fas Apoptotic Inhibitory Molecule                 | Protein Coding | 39 | GC03P138608 | 1.5 <a href="https://www.genecards.org/cgi-bin/carddisp.pl?gene=FAIM">https://www.genecards.org/cgi-bin/carddisp.pl?gene=FAIM</a>         |
| USP10    | Ubiquitin Specific Peptidase 10                   | Protein Coding | 44 | GC16P084734 | 1.49 <a href="https://www.genecards.org/cgi-bin/carddisp.pl?gene=USP10">https://www.genecards.org/cgi-bin/carddisp.pl?gene=USP10</a>      |
| CLGN     | Calmegin                                          | Protein Coding | 37 | GC04M140388 | 1.47 <a href="https://www.genecards.org/cgi-bin/carddisp.pl?gene=CLGN">https://www.genecards.org/cgi-bin/carddisp.pl?gene=CLGN</a>        |
| LYPLAL1  | Lysophospholipase Like 1                          | Protein Coding | 37 | GC01P219173 | 1.43 <a href="https://www.genecards.org/cgi-bin/carddisp.pl?gene=LYPLAL1">https://www.genecards.org/cgi-bin/carddisp.pl?gene=LYPLAL1</a>  |
| SH3BP5   | SH3 Domain Binding Protein 5                      | Protein Coding | 40 | GC03M015805 | 1.42 <a href="https://www.genecards.org/cgi-bin/carddisp.pl?gene=SH3BP5">https://www.genecards.org/cgi-bin/carddisp.pl?gene=SH3BP5</a>    |
| STK24    | Serine/Threonine Kinase 24                        | Protein Coding | 44 | GC13M098445 | 1.42 <a href="https://www.genecards.org/cgi-bin/carddisp.pl?gene=STK24">https://www.genecards.org/cgi-bin/carddisp.pl?gene=STK24</a>      |
| IGHG4    | Immunoglobulin Heavy Constant Gamma 4 (G4m Mar    | Protein Coding | 26 | GC14M109516 | 1.41 <a href="https://www.genecards.org/cgi-bin/carddisp.pl?gene=IGHG4">https://www.genecards.org/cgi-bin/carddisp.pl?gene=IGHG4</a>      |
| DUSP14   | Dual Specificity Phosphatase 14                   | Protein Coding | 37 | GC17P037489 | 1.38 <a href="https://www.genecards.org/cgi-bin/carddisp.pl?gene=DUSP14">https://www.genecards.org/cgi-bin/carddisp.pl?gene=DUSP14</a>    |
| SEC16B   | SEC16 Homolog B, Endoplasmic Reticulum Export Fa  | Protein Coding | 37 | GC01M177923 | 1.38 <a href="https://www.genecards.org/cgi-bin/carddisp.pl?gene=SEC16B">https://www.genecards.org/cgi-bin/carddisp.pl?gene=SEC16B</a>    |

|                |                                                       |                   |    |             |      |                                                                                                                                                   |
|----------------|-------------------------------------------------------|-------------------|----|-------------|------|---------------------------------------------------------------------------------------------------------------------------------------------------|
| DNAJC10        | DnaJ Heat Shock Protein Family (Hsp40) Member C1      | Protein Coding    | 37 | GC02P182716 | 1.37 | <a href="https://www.genecards.org/cgi-bin/carddisp.pl?gene=DNAJC10">https://www.genecards.org/cgi-bin/carddisp.pl?gene=DNAJC10</a>               |
| RANGAP1        | Ran GTPase Activating Protein 1                       | Protein Coding    | 41 | GC22M041244 | 1.37 | <a href="https://www.genecards.org/cgi-bin/carddisp.pl?gene=RANGAP1">https://www.genecards.org/cgi-bin/carddisp.pl?gene=RANGAP1</a>               |
| H2BC18         | H2B Clustered Histone 18                              | Protein Coding    | 27 | GC01M149955 | 1.35 | <a href="https://www.genecards.org/cgi-bin/carddisp.pl?gene=H2BC18">https://www.genecards.org/cgi-bin/carddisp.pl?gene=H2BC18</a>                 |
| HSP90AA2P      | Heat Shock Protein 90 Alpha Family Class A Member     | Pseudogene        | 20 | GC11M027888 | 1.34 | <a href="https://www.genecards.org/cgi-bin/carddisp.pl?gene=HSP90AA2P">https://www.genecards.org/cgi-bin/carddisp.pl?gene=HSP90AA2P</a>           |
| COP1           | COP1 E3 Ubiquitin Ligase                              | Protein Coding    | 33 | GC01M175944 | 1.33 | <a href="https://www.genecards.org/cgi-bin/carddisp.pl?gene=COP1">https://www.genecards.org/cgi-bin/carddisp.pl?gene=COP1</a>                     |
| H2BC11         | H2B Clustered Histone 11                              | Protein Coding    | 27 | GC06M027291 | 1.31 | <a href="https://www.genecards.org/cgi-bin/carddisp.pl?gene=H2BC11">https://www.genecards.org/cgi-bin/carddisp.pl?gene=H2BC11</a>                 |
| RAB32          | RAB32, Member RAS Oncogene Family                     | Protein Coding    | 37 | GC06P146543 | 1.3  | <a href="https://www.genecards.org/cgi-bin/carddisp.pl?gene=RAB32">https://www.genecards.org/cgi-bin/carddisp.pl?gene=RAB32</a>                   |
| PNLIPRP2       | Pancreatic Lipase Related Protein 2 (Gene/Pseudogene) | Protein Coding    | 37 | GC10P116620 | 1.3  | <a href="https://www.genecards.org/cgi-bin/carddisp.pl?gene=PNLIPRP2">https://www.genecards.org/cgi-bin/carddisp.pl?gene=PNLIPRP2</a>             |
| RAMP3          | Receptor Activity Modifying Protein 3                 | Protein Coding    | 40 | GC07P045163 | 1.28 | <a href="https://www.genecards.org/cgi-bin/carddisp.pl?gene=RAMP3">https://www.genecards.org/cgi-bin/carddisp.pl?gene=RAMP3</a>                   |
| TRIM47         | Tripartite Motif Containing 47                        | Protein Coding    | 34 | GC17M075874 | 1.28 | <a href="https://www.genecards.org/cgi-bin/carddisp.pl?gene=TRIM47">https://www.genecards.org/cgi-bin/carddisp.pl?gene=TRIM47</a>                 |
| TRPC4AP        | Transient Receptor Potential Cation Channel Subfamily | Protein Coding    | 37 | GC20M035002 | 1.27 | <a href="https://www.genecards.org/cgi-bin/carddisp.pl?gene=TRPC4AP">https://www.genecards.org/cgi-bin/carddisp.pl?gene=TRPC4AP</a>               |
| ZNF300         | Zinc Finger Protein 300                               | Protein Coding    | 36 | GC05M150894 | 1.26 | <a href="https://www.genecards.org/cgi-bin/carddisp.pl?gene=ZNF300">https://www.genecards.org/cgi-bin/carddisp.pl?gene=ZNF300</a>                 |
| SDF2L1         | Stromal Cell Derived Factor 2 Like 1                  | Protein Coding    | 35 | GC22P024225 | 1.25 | <a href="https://www.genecards.org/cgi-bin/carddisp.pl?gene=SDF2L1">https://www.genecards.org/cgi-bin/carddisp.pl?gene=SDF2L1</a>                 |
| BMP8B          | Bone Morphogenetic Protein 8b                         | Protein Coding    | 39 | GC01M039757 | 1.24 | <a href="https://www.genecards.org/cgi-bin/carddisp.pl?gene=BMP8B">https://www.genecards.org/cgi-bin/carddisp.pl?gene=BMP8B</a>                   |
| FNDC3B         | Fibronectin Type III Domain Containing 3B             | Protein Coding    | 36 | GC03P172039 | 1.23 | <a href="https://www.genecards.org/cgi-bin/carddisp.pl?gene=FNDC3B">https://www.genecards.org/cgi-bin/carddisp.pl?gene=FNDC3B</a>                 |
| DNAJC11        | DnaJ Heat Shock Protein Family (Hsp40) Member C11     | Protein Coding    | 35 | GC01M006634 | 1.22 | <a href="https://www.genecards.org/cgi-bin/carddisp.pl?gene=DNAJC11">https://www.genecards.org/cgi-bin/carddisp.pl?gene=DNAJC11</a>               |
| FUNDC2         | FUN14 Domain Containing 2                             | Protein Coding    | 33 | GC0XP155025 | 1.22 | <a href="https://www.genecards.org/cgi-bin/carddisp.pl?gene=FUNDC2">https://www.genecards.org/cgi-bin/carddisp.pl?gene=FUNDC2</a>                 |
| HIF3A          | Hypoxia Inducible Factor 3 Subunit Alpha              | Protein Coding    | 39 | GC19P046297 | 1.21 | <a href="https://www.genecards.org/cgi-bin/carddisp.pl?gene=HIF3A">https://www.genecards.org/cgi-bin/carddisp.pl?gene=HIF3A</a>                   |
| IGKV2D-23      | Immunoglobulin Kappa Variable 2D-23 (Pseudogene)      | Pseudogene        | 5  | GC02P090495 | 1.16 | <a href="https://www.genecards.org/cgi-bin/carddisp.pl?gene=IGKV2D-23">https://www.genecards.org/cgi-bin/carddisp.pl?gene=IGKV2D-23</a>           |
| RUBCNL         | Rubicon Like Autophagy Enhancer                       | Protein Coding    | 25 | GC13M046343 | 1.14 | <a href="https://www.genecards.org/cgi-bin/carddisp.pl?gene=RUBCNL">https://www.genecards.org/cgi-bin/carddisp.pl?gene=RUBCNL</a>                 |
| LOC109279247   | FGF21/FUT1 Promoter Region                            | Biological Region | 1  | GC19P048768 | 1.12 | <a href="https://www.genecards.org/cgi-bin/carddisp.pl?gene=LOC109279247">https://www.genecards.org/cgi-bin/carddisp.pl?gene=LOC109279247</a>     |
| LINC01684      | Long Intergenic Non-Protein Coding RNA 1684           | RNA Gene          | 9  | GC21P024306 | 1.11 | <a href="https://www.genecards.org/cgi-bin/carddisp.pl?gene=LINC01684">https://www.genecards.org/cgi-bin/carddisp.pl?gene=LINC01684</a>           |
| TXNDC5         | Thioredoxin Domain Containing 5                       | Protein Coding    | 39 | GC06M007893 | 1.1  | <a href="https://www.genecards.org/cgi-bin/carddisp.pl?gene=TXNDC5">https://www.genecards.org/cgi-bin/carddisp.pl?gene=TXNDC5</a>                 |
| RPL17-C18orf32 | RPL17-C18orf32 Readthrough                            | Protein Coding    | 21 | GC18M049481 | 1.09 | <a href="https://www.genecards.org/cgi-bin/carddisp.pl?gene=RPL17-C18orf32">https://www.genecards.org/cgi-bin/carddisp.pl?gene=RPL17-C18orf32</a> |
| PHLPP2         | PH Domain And Leucine Rich Repeat Protein Phosphatase | Protein Coding    | 41 | GC16M071637 | 1.09 | <a href="https://www.genecards.org/cgi-bin/carddisp.pl?gene=PHLPP2">https://www.genecards.org/cgi-bin/carddisp.pl?gene=PHLPP2</a>                 |
| MIR103B2       | MicroRNA 103b-2                                       | RNA Gene          | 9  | GC20M003899 | 1.06 | <a href="https://www.genecards.org/cgi-bin/carddisp.pl?gene=MIR103B2">https://www.genecards.org/cgi-bin/carddisp.pl?gene=MIR103B2</a>             |
| MIR103B1       | MicroRNA 103b-1                                       | RNA Gene          | 8  | GC05P168560 | 1.06 | <a href="https://www.genecards.org/cgi-bin/carddisp.pl?gene=MIR103B1">https://www.genecards.org/cgi-bin/carddisp.pl?gene=MIR103B1</a>             |
| SAP18          | Sin3A Associated Protein 18                           | Protein Coding    | 39 | GC13P021140 | 0.99 | <a href="https://www.genecards.org/cgi-bin/carddisp.pl?gene=SAP18">https://www.genecards.org/cgi-bin/carddisp.pl?gene=SAP18</a>                   |
| MAS1           | MAS1 Proto-Oncogene, G Protein-Coupled Receptor       | Protein Coding    | 40 | GC06P159906 | 0.98 | <a href="https://www.genecards.org/cgi-bin/carddisp.pl?gene=MAS1">https://www.genecards.org/cgi-bin/carddisp.pl?gene=MAS1</a>                     |
| CTDNBP1        | CTD Nuclear Envelope Phosphatase 1                    | Protein Coding    | 35 | GC17M007243 | 0.98 | <a href="https://www.genecards.org/cgi-bin/carddisp.pl?gene=CTDNBP1">https://www.genecards.org/cgi-bin/carddisp.pl?gene=CTDNBP1</a>               |
| YIPF6          | Yip1 Domain Family Member 6                           | Protein Coding    | 34 | GC0XP068498 | 0.97 | <a href="https://www.genecards.org/cgi-bin/carddisp.pl?gene=YIPF6">https://www.genecards.org/cgi-bin/carddisp.pl?gene=YIPF6</a>                   |
| CARD6          | Caspase Recruitment Domain Family Member 6            | Protein Coding    | 38 | GC05P040841 | 0.94 | <a href="https://www.genecards.org/cgi-bin/carddisp.pl?gene=CARD6">https://www.genecards.org/cgi-bin/carddisp.pl?gene=CARD6</a>                   |
| SUCNR1         | Succinate Receptor 1                                  | Protein Coding    | 40 | GC03P151873 | 0.93 | <a href="https://www.genecards.org/cgi-bin/carddisp.pl?gene=SUCNR1">https://www.genecards.org/cgi-bin/carddisp.pl?gene=SUCNR1</a>                 |
| PRMT3          | Protein Arginine Methyltransferase 3                  | Protein Coding    | 41 | GC11P020409 | 0.9  | <a href="https://www.genecards.org/cgi-bin/carddisp.pl?gene=PRMT3">https://www.genecards.org/cgi-bin/carddisp.pl?gene=PRMT3</a>                   |
| HERC4          | HECT And RLD Domain Containing E3 Ubiquitin Protein   | Protein Coding    | 36 | GC10M067921 | 0.85 | <a href="https://www.genecards.org/cgi-bin/carddisp.pl?gene=HERC4">https://www.genecards.org/cgi-bin/carddisp.pl?gene=HERC4</a>                   |
| CR1L           | Complement C3b/C4b Receptor 1 Like                    | Protein Coding    | 34 | GC01P207646 | 0.83 | <a href="https://www.genecards.org/cgi-bin/carddisp.pl?gene=CR1L">https://www.genecards.org/cgi-bin/carddisp.pl?gene=CR1L</a>                     |
| FAM174A        | Family With Sequence Similarity 174 Member A          | Protein Coding    | 32 | GC05P100535 | 0.75 | <a href="https://www.genecards.org/cgi-bin/carddisp.pl?gene=FAM174A">https://www.genecards.org/cgi-bin/carddisp.pl?gene=FAM174A</a>               |
| MIR4668        | MicroRNA 4668                                         | RNA Gene          | 12 | GC09P111932 | 0.58 | <a href="https://www.genecards.org/cgi-bin/carddisp.pl?gene=MIR4668">https://www.genecards.org/cgi-bin/carddisp.pl?gene=MIR4668</a>               |
| TM6SF1         | Transmembrane 6 Superfamily Member 1                  | Protein Coding    | 32 | GC15P083244 | 0.33 | <a href="https://www.genecards.org/cgi-bin/carddisp.pl?gene=TM6SF1">https://www.genecards.org/cgi-bin/carddisp.pl?gene=TM6SF1</a>                 |

| Information of Disgenet |            |        |         |         |                                               |                          |          |       |       |          |           |
|-------------------------|------------|--------|---------|---------|-----------------------------------------------|--------------------------|----------|-------|-------|----------|-----------|
| Disease                 | Disease_id | Gene   | Gene_id | UniProt | Gene_Full_Name                                | Protein_Class            | diseases | DSI_g | DPI_g | pLI      | Score_gda |
| Non-alcoholic Fatty     | C0400966   | TM6SF2 | 53345   | Q9BZW4  | transmembrane 6 superfamily class I member 2  |                          | 51       | 0.638 | 0.462 | 3.61E-05 | 0.6       |
| Non-alcoholic Fatty     | C0400966   | PNPLA3 | 80339   | Q9NST1  | patatin like domain containing 3              | Enzyme                   | 132      | 0.556 | 0.692 | 5.74E-08 | 0.5       |
| Non-alcoholic Fatty     | C0400966   | CYP2E1 | 1571    | P05181  | cytochrome P450 family 2 subfamily E member 1 |                          | 306      | 0.459 | 0.885 | 8.07E-09 | 0.4       |
| Non-alcoholic Fatty     | C0400966   | SIRT1  | 23411   | Q96EB6  | sirtuin 1                                     | Epigenetic               | 675      | 0.378 | 0.885 | 0.087326 | 0.4       |
| Non-alcoholic Fatty     | C0400966   | FGF21  | 26291   | Q9NSA1  | fibroblast growth factor 21                   | Signaling                | 236      | 0.485 | 0.769 | 0.029439 | 0.4       |
| Non-alcoholic Fatty     | C0400966   | LEP    | 3952    | P41159  | leptin                                        |                          | 931      | 0.349 | 0.846 | 0.46491  | 0.4       |
| Non-alcoholic Fatty     | C0400966   | NFE2L2 | 4780    | Q16236  | nuclear factor erythroid 2-like 2             | Enzyme                   | 823      | 0.357 | 0.885 | 0.003572 | 0.4       |
| Non-alcoholic Fatty     | C0400966   | PPARA  | 5465    | Q07869  | peroxisomal membrane protein 1                | Nuclear receptor         | 408      | 0.432 | 0.885 | 0.030182 | 0.4       |
| Non-alcoholic Fatty     | C0400966   | ADIPOQ | 9370    | Q15848  | adiponectin                                   | C1Q and collagen binding | 679      | 0.376 | 0.885 | 4.64E-09 | 0.4       |
| Non-alcoholic Fatty     | C0400966   | NR1H4  | 9971    | Q96RI1  | nuclear receptor subfamily 1 group H member 4 | Nuclear receptor         | 187      | 0.513 | 0.808 | 0.000939 | 0.4       |
| Non-alcoholic Fatty     | C0400966   | PPARD  | 5467    | Q03181  | peroxisomal membrane protein 2                | Nuclear receptor         | 197      | 0.513 | 0.846 | 0.99497  | 0.38      |
| Non-alcoholic Fatty     | C0400966   | SREBF1 | 6720    | P36956  | sterol regulatory element binding protein 1   |                          | 159      | 0.518 | 0.808 | 0.014708 | 0.38      |
| Non-alcoholic Fatty     | C0400966   | LDLR   | 3949    | P01130  | low density lipoprotein receptor              |                          | 336      | 0.449 | 0.885 | 9.84E-24 | 0.37      |
| Non-alcoholic Fatty     | C0400966   | XBPI   | 7494    | P17861  | X-box binding protein 1                       |                          | 234      | 0.477 | 0.846 | 0.032014 | 0.37      |
| Non-alcoholic Fatty     | C0400966   | CAT    | 847     | P04040  | catalase                                      | Enzyme                   | 794      | 0.359 | 0.962 | 1.63E-10 | 0.37      |
| Non-alcoholic Fatty     | C0400966   | FAS    | 355     | P25445  | Fas cell surface death receptor               |                          | 754      | 0.372 | 0.923 | 0.8117   | 0.36      |
| Non-alcoholic Fatty     | C0400966   | GNMT   | 27232   | Q14749  | glycine N-methyltransferase                   |                          | 57       | 0.626 | 0.462 | 0.002815 | 0.35      |
| Non-alcoholic Fatty     | C0400966   | PEMT   | 10400   | Q9UBM1  | phosphatidylethanolamine N-methyltransferase  |                          | 43       | 0.653 | 0.538 | 0.23456  | 0.34      |
| Non-alcoholic Fatty     | C0400966   | CPT1A  | 1374    | P50416  | carnitine palmitoyltransferase 1A             | Enzyme                   | 143      | 0.555 | 0.808 | 5.11E-09 | 0.34      |
| Non-alcoholic Fatty     | C0400966   | NR5A2  | 2494    | O00482  | nuclear receptor subfamily 5 group A member 2 | Nuclear receptor         | 116      | 0.563 | 0.731 | 0.23807  | 0.34      |
| Non-alcoholic Fatty     | C0400966   | TGFB1  | 7040    | P01137  | transforming growth factor beta 1             | Signaling                | 1558     | 0.287 | 0.962 | 0.03685  | 0.34      |
| Non-alcoholic Fatty     | C0400966   | AHR    | 196     | P35869  | aryl hydrocarbon receptor                     | Transcription factor     | 532      | 0.41  | 0.923 | 0.99999  | 0.33      |
| Non-alcoholic Fatty     | C0400966   | GSTM1  | 2944    | P09488  | glutathione S-transferase mu 1                |                          | 627      | 0.38  | 0.923 | 0.002064 | 0.33      |
| Non-alcoholic Fatty     | C0400966   | GSTP1  | 2950    | P09211  | glutathione S-transferase pi 1                |                          | 610      | 0.383 | 0.923 | 0.014155 | 0.33      |
| Non-alcoholic Fatty     | C0400966   | IL1A   | 3552    | P01583  | interleukin 1 alpha                           |                          | 1002     | 0.333 | 0.962 | 0.00016  | 0.33      |
| Non-alcoholic Fatty     | C0400966   | JAK2   | 3717    | O60674  | Janus kinase 2                                | Kinase                   | 644      | 0.385 | 0.885 | 0.65372  | 0.33      |
| Non-alcoholic Fatty     | C0400966   | PRKCA  | 5578    | P17252  | protein kinase C alpha                        | Kinase                   | 368      | 0.44  | 0.846 | 0.3677   | 0.33      |
| Non-alcoholic Fatty     | C0400966   | ABCC2  | 1244    | Q92887  | ATP binding cassette subfamily C member 2     | Transporter              | 254      | 0.483 | 0.808 | 5.2E-47  | 0.32      |
| Non-alcoholic Fatty     | C0400966   | KLB    | #####   | Q86Z14  | klotho beta                                   | Enzyme                   | 53       | 0.647 | 0.5   | 0.036433 | 0.32      |
| Non-alcoholic Fatty     | C0400966   | ACE    | 1636    | P12821  | angiotensin converting enzyme                 | Enzyme                   | 1082     | 0.328 | 0.923 | 1.03E-37 | 0.32      |
| Non-alcoholic Fatty     | C0400966   | ALDH2  | 217     | P05091  | aldehyde dehydrogenase 2                      | Enzyme                   | 337      | 0.457 | 0.885 | 3.4E-10  | 0.32      |
| Non-alcoholic Fatty     | C0400966   | GSTT1  | 2952    | P30711  | glutathione S-transferase theta 1             |                          | 541      | 0.393 | 0.923 | 0.000148 | 0.32      |
| Non-alcoholic Fatty     | C0400966   | PTEN   | 5728    | P60484  | phosphatase and tensin homolog                | Enzyme                   | 1349     | 0.305 | 0.923 | 0.25651  | 0.32      |
| Non-alcoholic Fatty     | C0400966   | CD14   | 929     | P08571  | CD14 molecule                                 |                          | 551      | 0.392 | 0.885 | 4.88E-05 | 0.32      |
| Non-alcoholic Fatty     | C0400966   | NQO1   | 1728    | P15559  | NAD(P)H quinone dehydrogenase 1               |                          | 368      | 0.434 | 0.885 | 1.19E-09 | 0.31      |
| Non-alcoholic Fatty     | C0400966   | FOLR2  | 2350    | P14207  | folate receptor beta                          |                          | 105      | 0.559 | 0.654 | 5.48E-06 | 0.31      |

|                              |          |              |                                       |      |       |       |          |      |
|------------------------------|----------|--------------|---------------------------------------|------|-------|-------|----------|------|
| Non-alcoholic Fatty C0400966 | GSTA1    | 2938 P08263  | glutathione S-transferase             | 108  | 0.561 | 0.731 | 1.73E-06 | 0.31 |
| Non-alcoholic Fatty C0400966 | IL4      | 3565 P05112  | interleukin 4                         | 996  | 0.332 | 0.962 | 0.004737 | 0.31 |
| Non-alcoholic Fatty C0400966 | LIF      | 3976 P15018  | LIF interle Signaling                 | 236  | 0.483 | 0.769 | 0.5242   | 0.31 |
| Non-alcoholic Fatty C0400966 | PDK4     | 5166 Q16654  | pyruvate dehydrogenase Kinase         | 85   | 0.578 | 0.577 | 9.14E-12 | 0.31 |
| Non-alcoholic Fatty C0400966 | PRKCD    | 5580 Q05655  | protein kinase C                      | 287  | 0.48  | 0.846 | 0.99995  | 0.31 |
| Non-alcoholic Fatty C0400966 | PRKCE    | 5581 Q02156  | protein kinase C                      | 112  | 0.597 | 0.692 | 0.99988  | 0.31 |
| Non-alcoholic Fatty C0400966 | VLDLR    | 7436 P98155  | very low density lipoprotein receptor | 143  | 0.558 | 0.692 | 1.96E-11 | 0.31 |
| Non-alcoholic Fatty C0400966 | ADH1A    | 124 P07327   | alcohol dehydrogenase                 | 50   | 0.647 | 0.577 | 1.71E-11 | 0.3  |
| Non-alcoholic Fatty C0400966 | ADH1B    | 125 P00325   | alcohol dehydrogenase                 | 224  | 0.502 | 0.846 | 9.93E-07 | 0.3  |
| Non-alcoholic Fatty C0400966 | ADH4     | 127 P08319   | alcohol dehydrogenase                 | 53   | 0.641 | 0.462 | 8.07E-07 | 0.3  |
| Non-alcoholic Fatty C0400966 | CSF2     | 1437 P04141  | colony stimulating factor             | 1028 | 0.33  | 0.962 | 0.83468  | 0.3  |
| Non-alcoholic Fatty C0400966 | CYP1A2   | 1544 P05177  | cytochrome P450                       | 218  | 0.494 | 0.923 | 2.48E-10 | 0.3  |
| Non-alcoholic Fatty C0400966 | CYP17A1  | 1586 P05093  | cytochrome P450                       | 326  | 0.462 | 0.769 | 0.000263 | 0.3  |
| Non-alcoholic Fatty C0400966 | AHCY     | 191 P23526   | adenosylhomocysteine                  | 107  | 0.582 | 0.692 | 0.035922 | 0.3  |
| Non-alcoholic Fatty C0400966 | F2       | 2147 P00734  | coagulation factor                    | 490  | 0.415 | 0.885 | 0.001112 | 0.3  |
| Non-alcoholic Fatty C0400966 | ALDH1A1  | 216 P00352   | aldehyde dehydrogenase                | 270  | 0.46  | 0.846 | 0.95448  | 0.3  |
| Non-alcoholic Fatty C0400966 | ALDH1B1  | 219 P30837   | aldehyde dehydrogenase                | 31   | 0.691 | 0.462 | 2.7E-06  | 0.3  |
| Non-alcoholic Fatty C0400966 | B3GAT1   | 27087 Q9P2W7 | beta-1,3-glucosyltransferase          | 199  | 0.494 | 0.769 | 0.13521  | 0.3  |
| Non-alcoholic Fatty C0400966 | EIF2AK1  | 27102 Q9BQI3 | eukaryotic translation                | 56   | 0.633 | 0.577 | 7.01E-07 | 0.3  |
| Non-alcoholic Fatty C0400966 | LAMA1    | ##### P25391 | laminin subunit alpha                 | 107  | 0.582 | 0.808 | 3.22E-32 | 0.3  |
| Non-alcoholic Fatty C0400966 | IL3      | 3562 P08700  | interleukin 3                         | 211  | 0.489 | 0.731 | 2.59E-09 | 0.3  |
| Non-alcoholic Fatty C0400966 | MMP1     | 4312 P03956  | matrix metalloproteinase              | 589  | 0.385 | 0.885 | 7.72E-18 | 0.3  |
| Non-alcoholic Fatty C0400966 | SERPINF1 | 5055 P05120  | serpin family F member 1              | 183  | 0.502 | 0.808 | 6.38E-12 | 0.3  |
| Non-alcoholic Fatty C0400966 | ABCB4    | 5244 P21439  | ATP binding cassette                  | 157  | 0.529 | 0.615 | 2.21E-07 | 0.3  |
| Non-alcoholic Fatty C0400966 | PRF1     | 5551 P14222  | perforin 1                            | 163  | 0.54  | 0.692 | 5.49E-06 | 0.3  |
| Non-alcoholic Fatty C0400966 | PRKACA   | 5566 P17612  | protein kinase C                      | 88   | 0.606 | 0.692 | 0.97142  | 0.3  |
| Non-alcoholic Fatty C0400966 | TRIB3    | 57761 Q96RU7 | tribbles protein                      | 104  | 0.573 | 0.692 | 1.16E-13 | 0.3  |
| Non-alcoholic Fatty C0400966 | RAG2     | 5897 P55895  | recombination activating              | 207  | 0.507 | 0.769 | 0.020287 | 0.3  |
| Non-alcoholic Fatty C0400966 | RDX      | 5962 P35241  | radixin                               | 80   | 0.593 | 0.615 | 0.85245  | 0.3  |
| Non-alcoholic Fatty C0400966 | TNFRSF1B | 7133 P20333  | TNF receptor superfamily              | 417  | 0.425 | 0.885 | 0.50201  | 0.3  |
| Non-alcoholic Fatty C0400966 | IKBKKG   | 8517 Q9Y6K9  | inhibitor of kinase                   | 252  | 0.493 | 0.769 | 0.084853 | 0.3  |
| Non-alcoholic Fatty C0400966 | STC2     | 8614 O76061  | stanniocalcin                         | 88   | 0.573 | 0.692 | 0.26588  | 0.3  |
| Non-alcoholic Fatty C0400966 | ALDH4A1  | 8659 P30038  | aldehyde dehydrogenase                | 12   | 0.792 | 0.231 | 1.37E-05 | 0.3  |
| Non-alcoholic Fatty C0400966 | SCARB1   | 949 Q8WTV0   | scavenger receptor                    | 116  | 0.559 | 0.731 | 0.066228 | 0.3  |
| Non-alcoholic Fatty C0400966 | GCKR     | 2646 Q14397  | glucokinase regulator                 | 136  | 0.604 | 0.615 | 8.54E-19 | 0.2  |
| Non-alcoholic Fatty C0400966 | ATP5F1B  | 506 P06576   | ATP synthase                          | 62   | 0.626 | 0.654 | 0.97679  | 0.2  |
| Non-alcoholic Fatty C0400966 | NCAN     | 1463 O14594  | neurocan                              | 44   | 0.67  | 0.5   | 0.068    | 0.18 |
| Non-alcoholic Fatty C0400966 | PARVB    | 29780 Q9HBI1 | parvin beta                           | 25   | 0.736 | 0.385 | 2.38E-13 | 0.14 |
| Non-alcoholic Fatty C0400966 | SAMM50   | 25813 Q9Y512 | SAMM50 sorting and                    | 14   | 0.78  | 0.269 | 4.88E-09 | 0.13 |

|                              |          |              |                         |      |       |       |          |      |
|------------------------------|----------|--------------|-------------------------|------|-------|-------|----------|------|
| Non-alcoholic Fatty C0400966 | FDFT1    | 2222 P37268  | farnesyl-diphosphate 1  | 62   | 0.621 | 0.615 | 4.1E-15  | 0.12 |
| Non-alcoholic Fatty C0400966 | PTPRD    | 5789 P23468  | protein tyr Enzyme      | 93   | 0.584 | 0.731 | 1        | 0.11 |
| Non-alcoholic Fatty C0400966 | ZGLP1    | ##### P0C6A0 | zinc finger GATA like   | 186  | 0.512 | 0.808 | 0.3868   | 0.1  |
| Non-alcoholic Fatty C0400966 | PPARGC1A | 10891 Q9UBK2 | PPARG cc Transcripti    | 350  | 0.453 | 0.885 | 0.9973   | 0.1  |
| Non-alcoholic Fatty C0400966 | NLRP3    | ##### Q96P20 | NLR family pyrin don    | 805  | 0.361 | 0.962 | 0.000811 | 0.1  |
| Non-alcoholic Fatty C0400966 | OSBPL5   | ##### Q9H0X9 | oxysterol binding prot  | 14   | 0.792 | 0.346 | 4.65E-06 | 0.1  |
| Non-alcoholic Fatty C0400966 | COL13A1  | 1305 Q5TAT6  | collagen type XIII alp  | 139  | 0.608 | 0.654 | 3.74E-14 | 0.1  |
| Non-alcoholic Fatty C0400966 | CRP      | 1401 P02741  | C-reactive protein      | 1483 | 0.299 | 0.962 | 0.003697 | 0.1  |
| Non-alcoholic Fatty C0400966 | DPP4     | 1803 P27487  | dipeptidyl Enzyme       | 451  | 0.42  | 0.808 | 7.28E-09 | 0.1  |
| Non-alcoholic Fatty C0400966 | ERBB4    | 2066 Q15303  | erb-b2 rec Kinase       | 317  | 0.455 | 0.846 | 0.99912  | 0.1  |
| Non-alcoholic Fatty C0400966 | FBL      | 2091 P22087  | fibrillarin Enzyme      | 94   | 0.572 | 0.654 | 0.99319  | 0.1  |
| Non-alcoholic Fatty C0400966 | ALB      | 213 P02768   | albumin Transporte      | 1198 | 0.317 | 0.962 | 0.64329  | 0.1  |
| Non-alcoholic Fatty C0400966 | EHBP1L1  | ##### Q8N3D4 | EH domain binding p     | 12   | 0.89  | 0.115 | 7.12E-13 | 0.1  |
| Non-alcoholic Fatty C0400966 | GCG      | 2641 P01275  | glucagon                | 441  | 0.431 | 0.885 | 0.034814 | 0.1  |
| Non-alcoholic Fatty C0400966 | SLC17A5  | 26503 Q9NRA2 | solute carri Transporte | 252  | 0.491 | 0.808 | 6.85E-10 | 0.1  |
| Non-alcoholic Fatty C0400966 | GGT1     | 2678 P19440  | gamma-gl Enzyme         | 209  | 0.496 | 0.885 | 7.53E-05 | 0.1  |
| Non-alcoholic Fatty C0400966 | GLP1R    | 2740 P43220  | glucagon li G-protein c | 288  | 0.471 | 0.846 | 0.29347  | 0.1  |
| Non-alcoholic Fatty C0400966 | GPT      | 2875 P24298  | glutamic-- Enzyme       | 511  | 0.403 | 0.923 | 3.59E-19 | 0.1  |
| Non-alcoholic Fatty C0400966 | HFE      | 3077 Q30201  | homeostatic iron regul  | 415  | 0.436 | 0.846 | 2.56E-08 | 0.1  |
| Non-alcoholic Fatty C0400966 | APOC3    | 345 P02656   | apolipoprotein C3       | 153  | 0.531 | 0.731 | 0.010024 | 0.1  |
| Non-alcoholic Fatty C0400966 | IGF1     | 3479 P05019  | insulin like growth fac | 1206 | 0.318 | 0.885 | 0.2716   | 0.1  |
| Non-alcoholic Fatty C0400966 | IL1B     | 3553 P01584  | interleukin 1 beta      | 1801 | 0.276 | 0.962 | 0.13005  | 0.1  |
| Non-alcoholic Fatty C0400966 | IL6      | 3569 P05231  | interleukin 6           | 2367 | 0.248 | 0.962 | 0.31536  | 0.1  |
| Non-alcoholic Fatty C0400966 | KRT18    | 3875 P05783  | keratin 18              | 151  | 0.53  | 0.692 | 0.73477  | 0.1  |
| Non-alcoholic Fatty C0400966 | LEPR     | 3953 P48357  | leptin rece Signaling   | 416  | 0.433 | 0.808 | 0.99475  | 0.1  |
| Non-alcoholic Fatty C0400966 | LIPA     | 3988 P38571  | lipase A, ly Enzyme     | 130  | 0.564 | 0.654 | 5.53E-07 | 0.1  |
| Non-alcoholic Fatty C0400966 | MIR122   | #####        | microRNA 122            | 250  | 0.468 | 0.808 |          | 0.1  |
| Non-alcoholic Fatty C0400966 | MIR21    | #####        | microRNA 21             | 726  | 0.363 | 0.846 |          | 0.1  |
| Non-alcoholic Fatty C0400966 | MIR34A   | #####        | microRNA 34a            | 428  | 0.421 | 0.846 |          | 0.1  |
| Non-alcoholic Fatty C0400966 | MTTP     | 4547 P55157  | microsoma Transporte    | 209  | 0.505 | 0.846 | 1.04E-05 | 0.1  |
| Non-alcoholic Fatty C0400966 | PIK3CA   | 5290 P42336  | phosphatid Kinase       | 1511 | 0.292 | 0.923 | 1        | 0.1  |
| Non-alcoholic Fatty C0400966 | PIK3CB   | 5291 P42338  | phosphatid Kinase       | 1083 | 0.322 | 0.885 | 0.99964  | 0.1  |
| Non-alcoholic Fatty C0400966 | PIK3CD   | 5293 O00329  | phosphatid Kinase       | 1119 | 0.319 | 0.885 | 0.99999  | 0.1  |
| Non-alcoholic Fatty C0400966 | PIK3CG   | 5294 P48736  | phosphatid Kinase       | 1101 | 0.32  | 0.885 | 1.41E-06 | 0.1  |
| Non-alcoholic Fatty C0400966 | PPARG    | 5468 P37231  | peroxisom Nuclear re    | 877  | 0.358 | 0.885 | 0.029194 | 0.1  |
| Non-alcoholic Fatty C0400966 | GATAD2A  | 54815 Q86YP4 | GATA zin Nucleic ac     | 19   | 0.792 | 0.231 | 0.99957  | 0.1  |
| Non-alcoholic Fatty C0400966 | PRKAA1   | 5562 Q13131  | protein kin Kinase      | 325  | 0.453 | 0.846 | 0.13725  | 0.1  |
| Non-alcoholic Fatty C0400966 | PRKAA2   | 5563 P54646  | protein kin Kinase      | 317  | 0.456 | 0.846 | 3.53E-08 | 0.1  |
| Non-alcoholic Fatty C0400966 | PRKAB1   | 5564 Q9Y478  | protein kin Kinase      | 296  | 0.46  | 0.846 | 0.005257 | 0.1  |

|                              |          |              |                                                      |                    |      |       |       |          |      |
|------------------------------|----------|--------------|------------------------------------------------------|--------------------|------|-------|-------|----------|------|
| Non-alcoholic Fatty C0400966 | RBP4     | 5950 P02753  | retinol bindi                                        | Transporte         | 217  | 0.493 | 0.808 | 0.51951  | 0.1  |
| Non-alcoholic Fatty C0400966 | SCD      | 6319 O00767  | stearoyl-CoA desaturase                              |                    | 225  | 0.49  | 0.808 | 0.96968  | 0.1  |
| Non-alcoholic Fatty C0400966 | SHBG     | 6462 P04278  | sex hormone binding globulin                         |                    | 368  | 0.438 | 0.808 | 1.25E-06 | 0.1  |
| Non-alcoholic Fatty C0400966 | SLC5A2   | 6524 P31639  | solute carrier family 5 member 2                     | Transporte         | 214  | 0.499 | 0.769 | 4.92E-14 | 0.1  |
| Non-alcoholic Fatty C0400966 | GGTLC5P  | #####        | gamma-glutamyltransferase 5                          |                    | 165  | 0.513 | 0.846 |          | 0.1  |
| Non-alcoholic Fatty C0400966 | SP4      | 6671 Q02446  | Sp4 transcription factor                             | Nucleic acid       | 30   | 0.711 | 0.423 | 0.99288  | 0.1  |
| Non-alcoholic Fatty C0400966 | SREBF2   | 6721 Q12772  | sterol regulatory element binding factor 2           |                    | 112  | 0.566 | 0.577 | 0.20734  | 0.1  |
| Non-alcoholic Fatty C0400966 | TLR4     | 7099 O00206  | toll like receptor 4                                 |                    | 1174 | 0.321 | 0.962 | 4.61E-09 | 0.1  |
| Non-alcoholic Fatty C0400966 | TNF      | 7124 P01375  | tumor necrosis factor                                | Signaling          | 2724 | 0.231 | 0.962 | 0.8033   | 0.1  |
| Non-alcoholic Fatty C0400966 | GGTLC3   | ##### B5MD39 | gamma-glutamyltransferase 3                          |                    | 165  | 0.513 | 0.846 |          | 0.1  |
| Non-alcoholic Fatty C0400966 | GGT2     | ##### P36268 | gamma-glutamyltransferase 2                          |                    | 165  | 0.513 | 0.846 | 0.00013  | 0.1  |
| Non-alcoholic Fatty C0400966 | GGTLC4P  | #####        | gamma-glutamyltransferase 4                          |                    | 165  | 0.513 | 0.846 |          | 0.1  |
| Non-alcoholic Fatty C0400966 | CNBP     | 7555 P62633  | CCHC-type zinc finger protein                        |                    | 125  | 0.556 | 0.692 | 0.95994  | 0.1  |
| Non-alcoholic Fatty C0400966 | MBOAT7   | 79143 Q96N66 | membrane bound oligosaccharide transferase 7         | Enzyme             | 83   | 0.612 | 0.5   | 0.113    | 0.1  |
| Non-alcoholic Fatty C0400966 | EHMT1    | 79813 Q9H9B1 | euchromatin histone methyltransferase 1              | Epigenetic         | 371  | 0.46  | 0.808 | 1        | 0.1  |
| Non-alcoholic Fatty C0400966 | ACTR5    | 79913 Q9H9F9 | actin related protein 5                              | Cellular structure | 2    | 0.931 | 0.077 | 1.14E-09 | 0.1  |
| Non-alcoholic Fatty C0400966 | ZNF512   | 84450 Q96ME7 | zinc finger protein 512                              |                    | 15   | 0.839 | 0.192 | 0.9765   | 0.1  |
| Non-alcoholic Fatty C0400966 | CRACR2A  | 84766 Q9BSW2 | calcium release activated calcium channel subunit 2A |                    | 9    | 0.792 | 0.231 | 7.43E-12 | 0.1  |
| Non-alcoholic Fatty C0400966 | PLPP7    | 84814 Q8NBV4 | phospholipid transfer protein 7                      | Enzyme             | 1    | 1     | 0.038 | 0.007998 | 0.1  |
| Non-alcoholic Fatty C0400966 | PWWP3A   | 84939 Q2TAK8 | PWWP domain containing protein 3A                    |                    | 49   | 0.636 | 0.385 | 0.002152 | 0.1  |
| Non-alcoholic Fatty C0400966 | TP63     | 8626 Q9H3D4  | tumor protein 63                                     | Transcription      | 816  | 0.362 | 0.769 | 0.99728  | 0.1  |
| Non-alcoholic Fatty C0400966 | DDX60L   | 91351 Q5H9U9 | DEAD/H-box 60 like                                   |                    | 4    | 0.861 | 0.115 | 1.07E-38 | 0.1  |
| Non-alcoholic Fatty C0400966 | XPR1     | 9213 Q9UBH6  | xenotropic retrovirus receptor 1                     | Transporte         | 217  | 0.488 | 0.731 | 0.99999  | 0.1  |
| Non-alcoholic Fatty C0400966 | CD36     | 948 P16671   | CD36 molecule                                        | Receptor           | 351  | 0.446 | 0.846 | 1.09E-60 | 0.1  |
| Non-alcoholic Fatty C0400966 | CREB5    | 9586 Q02930  | cAMP response element binding protein 5              | Transcription      | 48   | 0.682 | 0.538 | 0.22337  | 0.1  |
| Non-alcoholic Fatty C0400966 | FGF19    | 9965 O95750  | fibroblast growth factor 19                          | Signaling          | 123  | 0.548 | 0.615 | 0.57022  | 0.1  |
| Non-alcoholic Fatty C0400966 | AHSG     | 197 P02765   | alpha 2-HS glycoprotein                              | Enzyme             | 204  | 0.506 | 0.846 | 3.21E-10 | 0.09 |
| Non-alcoholic Fatty C0400966 | FASN     | 2194 P49327  | fatty acid synthase                                  | Enzyme             | 245  | 0.474 | 0.846 | 1        | 0.09 |
| Non-alcoholic Fatty C0400966 | GABPA    | 2551 Q06546  | GA binding protein A                                 | Transcription      | 632  | 0.379 | 0.885 | 0.99812  | 0.09 |
| Non-alcoholic Fatty C0400966 | GH1      | 2688 P01241  | growth hormone                                       | Signaling          | 686  | 0.373 | 0.923 | 0.030057 | 0.09 |
| Non-alcoholic Fatty C0400966 | LBP      | 3929 P18428  | lipopolysaccharide binding protein                   |                    | 156  | 0.525 | 0.808 | 4.19E-15 | 0.09 |
| Non-alcoholic Fatty C0400966 | LGALS3BP | 3959 Q08380  | galectin 3 binding protein                           |                    | 127  | 0.546 | 0.769 | 2.68E-07 | 0.09 |
| Non-alcoholic Fatty C0400966 | HAMP     | 57817 P81172 | hepcidin antimicrobial peptide                       |                    | 377  | 0.433 | 0.846 | 0.00818  | 0.09 |
| Non-alcoholic Fatty C0400966 | REN      | 5972 P00797  | renin                                                | Enzyme             | 721  | 0.37  | 0.923 | 2.43E-07 | 0.09 |
| Non-alcoholic Fatty C0400966 | NR1H3    | 10062 Q13133 | nuclear receptor 1H3                                 | Nuclear receptor   | 102  | 0.566 | 0.692 | 0.90374  | 0.08 |
| Non-alcoholic Fatty C0400966 | CYP3A4   | 1576 P08684  | cytochrome P450 3A4                                  | Enzyme             | 291  | 0.462 | 0.885 | 5.8E-11  | 0.08 |
| Non-alcoholic Fatty C0400966 | FABP1    | 2168 P07148  | fatty acid binding protein 1                         |                    | 85   | 0.588 | 0.692 | 9.8E-07  | 0.08 |
| Non-alcoholic Fatty C0400966 | SIRT3    | 23410 Q9NTG7 | sirtuin 3                                            | Epigenetic         | 227  | 0.488 | 0.731 | 0.000163 | 0.08 |
| Non-alcoholic Fatty C0400966 | HNF4A    | 3172 P41235  | hepatocyte nuclear factor 4A                         | Nuclear receptor   | 340  | 0.461 | 0.808 | 0.15285  | 0.08 |

|                              |              |              |                                                |      |       |       |          |      |
|------------------------------|--------------|--------------|------------------------------------------------|------|-------|-------|----------|------|
| Non-alcoholic Fatty C0400966 | HSD17B13     | ##### Q7Z5P4 | hydroxysteroid 17-beta                         | 58   | 0.623 | 0.538 | 2.74E-05 | 0.08 |
| Non-alcoholic Fatty C0400966 | IL17A        | 3605 Q16552  | interleukin 17A                                | 1074 | 0.324 | 0.923 | 0.043049 | 0.08 |
| Non-alcoholic Fatty C0400966 | MLXIPL       | 51085 Q9NP71 | MLX interacting protein                        | 165  | 0.554 | 0.731 | 0.047771 | 0.08 |
| Non-alcoholic Fatty C0400966 | CCL2         | 6347 P13500  | C-C motif Signaling                            | 1157 | 0.321 | 0.962 | 0.60786  | 0.08 |
| Non-alcoholic Fatty C0400966 | LOC102724197 | #####        | inactive glutathione hydrolase                 | 105  | 0.559 | 0.731 |          | 0.07 |
| Non-alcoholic Fatty C0400966 | AGTR1        | 185 P30556   | angiotensin II G-protein coupled               | 440  | 0.423 | 0.846 | 0.000532 | 0.07 |
| Non-alcoholic Fatty C0400966 | MTOR         | 2475 P42345  | mechanistic Target of Rapamycin Kinase         | 960  | 0.343 | 0.885 | 1        | 0.07 |
| Non-alcoholic Fatty C0400966 | FETUB        | 26998 Q9UGM5 | fetuin B Enzyme                                | 38   | 0.686 | 0.308 | 8.88E-08 | 0.07 |
| Non-alcoholic Fatty C0400966 | APOE         | 348 P02649   | apolipoprotein E                               | 1049 | 0.338 | 0.962 | 0.001869 | 0.07 |
| Non-alcoholic Fatty C0400966 | PON1         | 5444 P27169  | paraoxonase 1                                  | 496  | 0.409 | 0.885 | 9.81E-11 | 0.07 |
| Non-alcoholic Fatty C0400966 | RETN         | 56729 Q9HD89 | resistin                                       | 302  | 0.454 | 0.808 | 0.036545 | 0.07 |
| Non-alcoholic Fatty C0400966 | RARRES2      | 5919 Q99969  | retinoic acid receptor related 2               | 180  | 0.519 | 0.731 | 2.72E-05 | 0.07 |
| Non-alcoholic Fatty C0400966 | UCP2         | 7351 P55851  | uncoupling Transporter 2                       | 235  | 0.493 | 0.808 | 1.55E-10 | 0.07 |
| Non-alcoholic Fatty C0400966 | NR0B2        | 8431 Q15466  | nuclear receptor subfamily 0B class 2 member 2 | 251  | 0.474 | 0.808 | 8.34E-06 | 0.07 |
| Non-alcoholic Fatty C0400966 | GGTLC1       | 92086 Q9BX51 | gamma-glutamyl transaminase 1                  | 105  | 0.559 | 0.731 | 3.34E-05 | 0.07 |
| Non-alcoholic Fatty C0400966 | DECR1        | 1666 Q16698  | 2,4-dienoyl-CoA hydratase                      | 399  | 0.426 | 0.885 | 4.47E-14 | 0.06 |
| Non-alcoholic Fatty C0400966 | PCSK9        | ##### Q8NBP7 | proprotein convertase subtilisin/kexin type 9  | 257  | 0.482 | 0.808 | 2.71E-17 | 0.06 |
| Non-alcoholic Fatty C0400966 | ACACA        | 31 Q13085    | acetyl-CoA carboxylase alpha                   | 241  | 0.48  | 0.846 | 1        | 0.06 |
| Non-alcoholic Fatty C0400966 | HMGB1        | 3146 P09429  | high mobility group box 1                      | 724  | 0.368 | 0.923 | 0.82035  | 0.06 |
| Non-alcoholic Fatty C0400966 | APOB         | 338 P04114   | apolipoprotein B                               | 339  | 0.453 | 0.808 | 1.92E-16 | 0.06 |
| Non-alcoholic Fatty C0400966 | IL10         | 3586 P22301  | interleukin 10                                 | 1679 | 0.281 | 0.923 | 0.005887 | 0.06 |
| Non-alcoholic Fatty C0400966 | LPL          | 4023 P06858  | lipoprotein lipase                             | 290  | 0.474 | 0.808 | 1.27E-09 | 0.06 |
| Non-alcoholic Fatty C0400966 | MIR192       | #####        | microRNA 192                                   | 173  | 0.503 | 0.846 |          | 0.06 |
| Non-alcoholic Fatty C0400966 | MTHFR        | 4524 P42898  | methylenetetrahydrofolate dehydrogenase        | 985  | 0.337 | 0.885 | 3.21E-10 | 0.06 |
| Non-alcoholic Fatty C0400966 | SERPINE1     | 5054 P05121  | serpin family E member 1                       | 770  | 0.359 | 0.885 | 0.043609 | 0.06 |
| Non-alcoholic Fatty C0400966 | ANGPTL8      | 55908 Q6UXH0 | angiopoietin-like 8                            | 54   | 0.65  | 0.577 | 6.88E-12 | 0.06 |
| Non-alcoholic Fatty C0400966 | SOD1         | 6647 P00441  | superoxide dismutase 1                         | 689  | 0.379 | 0.962 | 0.1773   | 0.06 |
| Non-alcoholic Fatty C0400966 | TP53         | 7157 P04637  | tumor protein p53                              | 2494 | 0.236 | 0.962 | 0.53235  | 0.06 |
| Non-alcoholic Fatty C0400966 | VDR          | 7421 P11473  | vitamin D receptor                             | 852  | 0.352 | 0.885 | 1.68E-05 | 0.06 |
| Non-alcoholic Fatty C0400966 | IRS2         | 8660 Q9Y4H2  | insulin receptor substrate 2                   | 152  | 0.535 | 0.654 | 0.99032  | 0.06 |
| Non-alcoholic Fatty C0400966 | TRIB1        | 10221 Q96RU8 | tribbles protein 1                             | 61   | 0.617 | 0.577 | 0.83343  | 0.05 |
| Non-alcoholic Fatty C0400966 | TXNIP        | 10628 Q9H3M7 | thioredoxin interacting protein                | 208  | 0.49  | 0.731 | 0.15918  | 0.05 |
| Non-alcoholic Fatty C0400966 | PLIN2        | 123 Q99541   | perilipin 2                                    | 100  | 0.564 | 0.692 | 7.53E-09 | 0.05 |
| Non-alcoholic Fatty C0400966 | CNR1         | 1268 P21554  | cannabinoid receptor 1                         | 393  | 0.446 | 0.808 | 0.50652  | 0.05 |
| Non-alcoholic Fatty C0400966 | CYBB         | 1536 P04839  | cytochrome b-245 beta chain                    | 343  | 0.452 | 0.885 | 0.99904  | 0.05 |
| Non-alcoholic Fatty C0400966 | AKT1         | 207 P31749   | AKT serine/threonine kinase                    | 1250 | 0.311 | 0.962 | 0.9759   | 0.05 |
| Non-alcoholic Fatty C0400966 | ABCD1        | 215 P33897   | ATP binding cassette subfamily 1 member 1      | 154  | 0.563 | 0.731 | 0.99896  | 0.05 |
| Non-alcoholic Fatty C0400966 | FOXO1        | 2308 Q12778  | forkhead box O1                                | 380  | 0.433 | 0.846 | 0.99725  | 0.05 |
| Non-alcoholic Fatty C0400966 | GOLGA6A      | ##### Q9NYA3 | golgin A6 family member 1                      | 90   | 0.592 | 0.654 | 1.61E-05 | 0.05 |



|                              |          |              |                         |      |       |       |          |      |
|------------------------------|----------|--------------|-------------------------|------|-------|-------|----------|------|
| Non-alcoholic Fatty C0400966 | APRT     | 353 P07741   | adenine phosphoribos    | 384  | 0.423 | 0.846 | 5.45E-13 | 0.05 |
| Non-alcoholic Fatty C0400966 | IRS1     | 3667 P35568  | insulin receptor substr | 233  | 0.488 | 0.769 | 0.023645 | 0.05 |
| Non-alcoholic Fatty C0400966 | MIR33A   | #####        | microRNA 33a            | 100  | 0.56  | 0.654 |          | 0.05 |
| Non-alcoholic Fatty C0400966 | MFAP1    | 4236 P55081  | microfibril Extracellul | 357  | 0.431 | 0.846 | 0.79602  | 0.05 |
| Non-alcoholic Fatty C0400966 | NR3C2    | 4306 P08235  | nuclear rec Nuclear re  | 287  | 0.469 | 0.846 | 0.83739  | 0.05 |
| Non-alcoholic Fatty C0400966 | SERPINA1 | 5265 P01009  | serpin fam Enzyme m     | 482  | 0.41  | 0.923 | 6.85E-08 | 0.05 |
| Non-alcoholic Fatty C0400966 | RCBTB1   | 55213 Q8NDN9 | RCC1 and Enzyme m       | 112  | 0.572 | 0.692 | 1.56E-06 | 0.05 |
| Non-alcoholic Fatty C0400966 | PNPLA2   | 57104 Q96AD5 | patatin like Enzyme     | 199  | 0.511 | 0.846 | 0.004107 | 0.05 |
| Non-alcoholic Fatty C0400966 | SELENOP  | 6414 P49908  | selenoprot Extracellul  | 138  | 0.545 | 0.769 | 8.29E-07 | 0.05 |
| Non-alcoholic Fatty C0400966 | SOD2     | 6648 P04179  | superoxide Enzyme       | 668  | 0.379 | 0.923 | 0.15499  | 0.05 |
| Non-alcoholic Fatty C0400966 | STAT3    | 6774 P40763  | signal tran Nucleic ac  | 1193 | 0.32  | 0.923 | 1        | 0.05 |
| Non-alcoholic Fatty C0400966 | PPP1R3B  | 79660 Q86XI6 | protein phc Enzyme m    | 31   | 0.686 | 0.462 | 0.065025 | 0.05 |
| Non-alcoholic Fatty C0400966 | NR1I2    | 8856 O75469  | nuclear rec Nuclear re  | 462  | 0.418 | 0.846 | 7.27E-09 | 0.05 |
| Non-alcoholic Fatty C0400966 | FADS2    | 9415 O95864  | fatty acid desaturase 2 | 140  | 0.575 | 0.692 | 0.99815  | 0.05 |
| Non-alcoholic Fatty C0400966 | CEBPA    | 1050 P49715  | CCAAT ei Transcripti    | 201  | 0.496 | 0.692 | 0.55365  | 0.04 |
| Non-alcoholic Fatty C0400966 | CETP     | 1071 P11597  | cholesteryl ester trans | 188  | 0.512 | 0.731 | 1.19E-23 | 0.04 |
| Non-alcoholic Fatty C0400966 | SLC27A5  | 10998 Q9Y2P5 | solute carri Transporte | 111  | 0.563 | 0.769 | 8.37E-15 | 0.04 |
| Non-alcoholic Fatty C0400966 | APOA5    | ##### Q6Q788 | apolipoprotein A5       | 107  | 0.587 | 0.615 | 5.58E-10 | 0.04 |
| Non-alcoholic Fatty C0400966 | COL1A1   | 1277 P02452  | collagen type I alpha 1 | 487  | 0.43  | 0.808 | 1        | 0.04 |
| Non-alcoholic Fatty C0400966 | KLF6     | 1316 Q99612  | Kruppel lii Nucleic ac  | 204  | 0.501 | 0.846 | 0.97946  | 0.04 |
| Non-alcoholic Fatty C0400966 | NRG4     | ##### Q8WWG1 | neuregulin Signaling    | 71   | 0.623 | 0.654 | 0.027981 | 0.04 |
| Non-alcoholic Fatty C0400966 | TMC4     | ##### Q7Z404 | transmemb Ion channe    | 12   | 0.805 | 0.192 | 1.72E-13 | 0.04 |
| Non-alcoholic Fatty C0400966 | EGFR     | 1956 P00533  | epidermal Kinase        | 1394 | 0.295 | 0.885 | 0.36837  | 0.04 |
| Non-alcoholic Fatty C0400966 | EPAS1    | 2034 Q99814  | endothelial Transcripti | 293  | 0.454 | 0.731 | 0.5961   | 0.04 |
| Non-alcoholic Fatty C0400966 | FABP4    | 2167 P15090  | fatty acid binding prot | 194  | 0.5   | 0.808 | 5.18E-05 | 0.04 |
| Non-alcoholic Fatty C0400966 | FGL1     | 2267 Q08830  | fibrinogen Signaling    | 53   | 0.638 | 0.692 | 1.68E-25 | 0.04 |
| Non-alcoholic Fatty C0400966 | FLII     | 2314 Q13045  | FLII actin remodeling   | 198  | 0.52  | 0.808 | 5.53E-12 | 0.04 |
| Non-alcoholic Fatty C0400966 | GCK      | 2645 P35557  | glucokinas Kinase       | 210  | 0.523 | 0.808 | 0.63464  | 0.04 |
| Non-alcoholic Fatty C0400966 | IFNL3    | ##### Q8IZI9 | interferon lambda 3     | 175  | 0.506 | 0.808 | 2.42E-08 | 0.04 |
| Non-alcoholic Fatty C0400966 | HIF1A    | 3091 Q16665  | hypoxia in Transcripti  | 1044 | 0.327 | 0.923 | 0.9777   | 0.04 |
| Non-alcoholic Fatty C0400966 | HP       | 3240 P00738  | haptoglobi Enzyme       | 464  | 0.412 | 0.885 | 1.74E-05 | 0.04 |
| Non-alcoholic Fatty C0400966 | HSD11B1  | 3290 P28845  | hydroxysteroid 11-bet   | 163  | 0.52  | 0.731 | 0.41696  | 0.04 |
| Non-alcoholic Fatty C0400966 | IFNG     | 3458 P01579  | interferon gamma        | 1519 | 0.288 | 0.962 | 0.47156  | 0.04 |
| Non-alcoholic Fatty C0400966 | APP      | 351 P05067   | amyloid be Enzyme m     | 485  | 0.422 | 0.846 | 0.046544 | 0.04 |
| Non-alcoholic Fatty C0400966 | IL18     | 3606 Q14116  | interleukin 18          | 750  | 0.365 | 0.923 | 0.030717 | 0.04 |
| Non-alcoholic Fatty C0400966 | INSR     | 3643 P06213  | insulin rec Kinase      | 452  | 0.432 | 0.846 | 3.61E-05 | 0.04 |
| Non-alcoholic Fatty C0400966 | MIR29A   | #####        | microRNA 29a            | 278  | 0.459 | 0.808 |          | 0.04 |
| Non-alcoholic Fatty C0400966 | MAP3K5   | 4217 Q99683  | mitogen-ac Kinase       | 170  | 0.513 | 0.808 | 0.51964  | 0.04 |
| Non-alcoholic Fatty C0400966 | CHPT1    | 56994 Q8WUD6 | choline phc Enzyme      | 253  | 0.474 | 0.846 | 0.000243 | 0.04 |

|                              |         |              |                         |      |       |       |          |      |
|------------------------------|---------|--------------|-------------------------|------|-------|-------|----------|------|
| Non-alcoholic Fatty C0400966 | BGLAP   | 632 P02818   | bone gamma-carboxy      | 274  | 0.462 | 0.846 | 4.62E-08 | 0.04 |
| Non-alcoholic Fatty C0400966 | SPP1    | 6696 P10451  | secreted phosphoprote   | 824  | 0.353 | 0.885 | 2.15E-06 | 0.04 |
| Non-alcoholic Fatty C0400966 | TLR2    | 7097 O60603  | toll like receptor 2    | 749  | 0.361 | 0.923 | 1.02E-06 | 0.04 |
| Non-alcoholic Fatty C0400966 | CCR2    | ##### P41597 | C-C motif chemokine     | 436  | 0.418 | 0.846 | 0.023412 | 0.04 |
| Non-alcoholic Fatty C0400966 | VEGFA   | 7422 P15692  | vascular er Signaling   | 1899 | 0.266 | 0.923 | 2.41E-05 | 0.04 |
| Non-alcoholic Fatty C0400966 | FTO     | 79068 Q9C0B1 | FTO alpha-ketoglutar    | 286  | 0.486 | 0.885 | 8.36E-08 | 0.04 |
| Non-alcoholic Fatty C0400966 | CASP1   | 834 P29466   | caspase 1 Enzyme        | 444  | 0.413 | 0.885 | 3.52E-05 | 0.04 |
| Non-alcoholic Fatty C0400966 | ABCB11  | 8647 O95342  | ATP bindi Transpor      | 126  | 0.566 | 0.654 | 1.56E-12 | 0.04 |
| Non-alcoholic Fatty C0400966 | TNFSF10 | 8743 P50591  | TNF super Signaling     | 445  | 0.413 | 0.885 | 0.13495  | 0.04 |
| Non-alcoholic Fatty C0400966 | NAMPT   | 10135 P43490 | nicotinami Signaling    | 199  | 0.502 | 0.808 | 0.97914  | 0.03 |
| Non-alcoholic Fatty C0400966 | FST     | 10468 P19883 | follistatin Enzyme m    | 182  | 0.513 | 0.731 | 0.98014  | 0.03 |
| Non-alcoholic Fatty C0400966 | PRRT2   | ##### Q7Z6L0 | proline rich transmem   | 353  | 0.448 | 0.808 | 0.57919  | 0.03 |
| Non-alcoholic Fatty C0400966 | CMKLR1  | 1240 Q99788  | chemerin c G-protein c  | 75   | 0.612 | 0.692 | 0.010767 | 0.03 |
| Non-alcoholic Fatty C0400966 | CPT2    | 1376 P23786  | carnitine p Enzyme      | 187  | 0.542 | 0.769 | 4.6E-10  | 0.03 |
| Non-alcoholic Fatty C0400966 | PARP1   | 142 P09874   | poly(ADP-ribose) pol    | 565  | 0.389 | 0.923 | 0.000334 | 0.03 |
| Non-alcoholic Fatty C0400966 | CTNNB1  | 1499 P35222  | catenin beta 1          | 1368 | 0.303 | 0.885 | 0.99999  | 0.03 |
| Non-alcoholic Fatty C0400966 | GPBAR1  | ##### Q8TDU6 | G protein-c G-protein c | 122  | 0.548 | 0.731 | 1.36E-09 | 0.03 |
| Non-alcoholic Fatty C0400966 | CYP7A1  | 1581 P22680  | cytochrom Enzyme        | 91   | 0.576 | 0.615 | 0.000245 | 0.03 |
| Non-alcoholic Fatty C0400966 | DLAT    | 1737 P10515  | dihydrolipoamide S-ac   | 93   | 0.576 | 0.731 | 2.3E-08  | 0.03 |
| Non-alcoholic Fatty C0400966 | AFP     | 174 P02771   | alpha fetop Transpor    | 392  | 0.429 | 0.885 | 1.14E-11 | 0.03 |
| Non-alcoholic Fatty C0400966 | AGER    | 177 Q15109   | advanced g Receptor     | 450  | 0.42  | 0.885 | 6.35E-16 | 0.03 |
| Non-alcoholic Fatty C0400966 | AGT     | 183 P01019   | angiotensin Enzyme m    | 765  | 0.367 | 0.923 | 4.97E-08 | 0.03 |
| Non-alcoholic Fatty C0400966 | ABCA1   | 19 O95477    | ATP bindi Transpor      | 291  | 0.467 | 0.846 | 1.45E-13 | 0.03 |
| Non-alcoholic Fatty C0400966 | FGFR4   | 2264 P22455  | fibroblast g Kinase     | 220  | 0.49  | 0.769 | 7.19E-13 | 0.03 |
| Non-alcoholic Fatty C0400966 | SMUG1   | 23583 Q53HV7 | single-strand-selective | 1034 | 0.322 | 0.923 | 0.000452 | 0.03 |
| Non-alcoholic Fatty C0400966 | GIP     | 2695 P09681  | gastric inhibitory poly | 110  | 0.57  | 0.654 | 0.27108  | 0.03 |
| Non-alcoholic Fatty C0400966 | HPGDS   | 27306 O60760 | hematopoietic prostag   | 570  | 0.388 | 0.923 | 1.81E-06 | 0.03 |
| Non-alcoholic Fatty C0400966 | GOT2    | 2806 P00505  | glutamic-oxaloacetic t  | 148  | 0.529 | 0.731 | 0.014233 | 0.03 |
| Non-alcoholic Fatty C0400966 | NEAT1   | #####        | nuclear paraspeckle as  | 179  | 0.502 | 0.769 |          | 0.03 |
| Non-alcoholic Fatty C0400966 | OR10A4  | ##### Q9H209 | olfactory r G-protein c | 128  | 0.54  | 0.808 | 1.68E-05 | 0.03 |
| Non-alcoholic Fatty C0400966 | GPX1    | 2876 P07203  | glutathione Enzyme      | 290  | 0.458 | 0.923 | 3.85E-05 | 0.03 |
| Non-alcoholic Fatty C0400966 | ANPEP   | 290 P15144   | alanyl amin Enzyme      | 280  | 0.462 | 0.769 | 3.75E-09 | 0.03 |
| Non-alcoholic Fatty C0400966 | NPC1L1  | 29881 Q9UHC9 | NPC1 like Transpor      | 40   | 0.656 | 0.423 | 2.31E-20 | 0.03 |
| Non-alcoholic Fatty C0400966 | HMOX1   | 3162 P09601  | heme oxygenase 1        | 666  | 0.381 | 0.923 | 0.009682 | 0.03 |
| Non-alcoholic Fatty C0400966 | CXCL10  | 3627 P02778  | C-X-C m Signaling       | 631  | 0.378 | 0.885 | 0.36865  | 0.03 |
| Non-alcoholic Fatty C0400966 | CYP4F3  | 4051 Q08477  | cytochrom Enzyme        | 114  | 0.551 | 0.808 | 3.54E-16 | 0.03 |
| Non-alcoholic Fatty C0400966 | ARNTL   | 406 O00327   | aryl hydroc Transcripti | 200  | 0.51  | 0.885 | 0.99444  | 0.03 |
| Non-alcoholic Fatty C0400966 | MIR140  | #####        | microRNA 140            | 144  | 0.522 | 0.769 |          | 0.03 |
| Non-alcoholic Fatty C0400966 | MIR155  | #####        | microRNA 155            | 584  | 0.384 | 0.885 |          | 0.03 |

|                              |           |              |                         |      |       |       |          |      |
|------------------------------|-----------|--------------|-------------------------|------|-------|-------|----------|------|
| Non-alcoholic Fatty C0400966 | MMP2      | 4313 P08253  | matrix met Enzyme       | 1021 | 0.333 | 0.923 | 0.83878  | 0.03 |
| Non-alcoholic Fatty C0400966 | MT1B      | 4490 P07438  | metallothionein 1B      | 89   | 0.585 | 0.731 | 0.005378 | 0.03 |
| Non-alcoholic Fatty C0400966 | ACLY      | 47 P53396    | ATP citrat Enzyme       | 109  | 0.563 | 0.692 | 0.083556 | 0.03 |
| Non-alcoholic Fatty C0400966 | NTS       | 4922 P30990  | neurotensin             | 184  | 0.517 | 0.769 | 3.85E-05 | 0.03 |
| Non-alcoholic Fatty C0400966 | MIR378A   | #####        | microRNA 378a           | 127  | 0.532 | 0.808 |          | 0.03 |
| Non-alcoholic Fatty C0400966 | BCO1      | 53630 Q9HAY6 | beta-carote Enzyme      | 29   | 0.705 | 0.462 | 5.5E-12  | 0.03 |
| Non-alcoholic Fatty C0400966 | PRKCB     | 5579 P05771  | protein kin Kinase      | 317  | 0.453 | 0.885 | 1        | 0.03 |
| Non-alcoholic Fatty C0400966 | MAPK8     | 5599 P45983  | mitogen-ac Kinase       | 520  | 0.397 | 0.885 | 0.99823  | 0.03 |
| Non-alcoholic Fatty C0400966 | PRL       | 5617 P01236  | prolactin Signaling     | 506  | 0.406 | 0.885 | 2.9E-07  | 0.03 |
| Non-alcoholic Fatty C0400966 | MIR451A   | #####        | microRNA 451a           | 177  | 0.505 | 0.769 |          | 0.03 |
| Non-alcoholic Fatty C0400966 | CXCL16    | 58191 Q9H2A7 | C-X-C mo Signaling      | 178  | 0.502 | 0.769 | 3.45E-05 | 0.03 |
| Non-alcoholic Fatty C0400966 | ACE2      | 59272 Q9BYF1 | angiotensin Enzyme      | 253  | 0.477 | 0.769 | 0.99769  | 0.03 |
| Non-alcoholic Fatty C0400966 | BCL2      | 596 P10415   | BCL2 apo Signaling      | 1456 | 0.291 | 0.885 | 0.55903  | 0.03 |
| Non-alcoholic Fatty C0400966 | BCL2A1    | 597 Q16548   | BCL2 relat Signaling    | 150  | 0.529 | 0.731 | 0.20785  | 0.03 |
| Non-alcoholic Fatty C0400966 | SAV1      | 60485 Q9H4B6 | salvador family WW c    | 42   | 0.659 | 0.5   | 0.000904 | 0.03 |
| Non-alcoholic Fatty C0400966 | SLC10A2   | 6555 Q12908  | solute carri Transporte | 66   | 0.621 | 0.538 | 9.58E-17 | 0.03 |
| Non-alcoholic Fatty C0400966 | SMN1      | 6606 Q16637  | survival of Epigenetic  | 317  | 0.454 | 0.769 | 0.015829 | 0.03 |
| Non-alcoholic Fatty C0400966 | SMN2      | 6607 Q16637  | survival of motor neur  | 299  | 0.459 | 0.769 | 0.10337  | 0.03 |
| Non-alcoholic Fatty C0400966 | BNIP3     | 664 Q12983   | BCL2 interacting prot   | 158  | 0.52  | 0.731 | 1.97E-05 | 0.03 |
| Non-alcoholic Fatty C0400966 | TERT      | 7015 O14746  | telomerase Enzyme       | 703  | 0.374 | 0.846 | 0.99046  | 0.03 |
| Non-alcoholic Fatty C0400966 | TIMP1     | 7076 P01033  | TIMP met Enzyme m       | 603  | 0.38  | 0.885 | 0.4993   | 0.03 |
| Non-alcoholic Fatty C0400966 | TIMP2     | 7077 P16035  | TIMP met Enzyme m       | 404  | 0.425 | 0.846 | 0.78893  | 0.03 |
| Non-alcoholic Fatty C0400966 | ADIPOR2   | 79602 Q86V24 | adiponectin Receptor    | 103  | 0.564 | 0.731 | 0.36218  | 0.03 |
| Non-alcoholic Fatty C0400966 | BCO2      | 83875 Q9BYV7 | beta-carotene oxygena   | 19   | 0.78  | 0.231 | 3.78E-18 | 0.03 |
| Non-alcoholic Fatty C0400966 | CAV1      | 857 Q03135   | caveolin 1 Enzyme m     | 633  | 0.388 | 0.885 | 0.008274 | 0.03 |
| Non-alcoholic Fatty C0400966 | GDF15     | 9518 Q99988  | growth dif Signaling    | 389  | 0.429 | 0.808 | 3.01E-07 | 0.03 |
| Non-alcoholic Fatty C0400966 | BMS1      | 9790 Q14692  | BMS1 ribosome bioge     | 192  | 0.499 | 0.846 | 0.000175 | 0.03 |
| Non-alcoholic Fatty C0400966 | NR1I3     | 9970 Q14994  | nuclear rec Nuclear re  | 318  | 0.448 | 0.846 | 3.53E-08 | 0.03 |
| Non-alcoholic Fatty C0400966 | FAS-AS1   | #####        | FAS antisense RNA 1     | 29   | 0.695 | 0.538 |          | 0.02 |
| Non-alcoholic Fatty C0400966 | LINC01672 | #####        | long intergenic non-pr  | 268  | 0.462 | 0.846 |          | 0.02 |
| Non-alcoholic Fatty C0400966 | PSC       | #####        | Cholangitis, primary s  | 67   | 0.603 | 0.731 |          | 0.02 |
| Non-alcoholic Fatty C0400966 | TLR6      | 10333 Q9Y2C9 | toll like receptor 6    | 106  | 0.556 | 0.769 | 2.25E-05 | 0.02 |
| Non-alcoholic Fatty C0400966 | YAP1      | 10413 P46937 | Yes associ Enzyme m     | 374  | 0.432 | 0.808 | 0.99918  | 0.02 |
| Non-alcoholic Fatty C0400966 | POSTN     | 10631 Q15063 | periostin Signaling     | 378  | 0.428 | 0.885 | 1.07E-09 | 0.02 |
| Non-alcoholic Fatty C0400966 | CES1      | 1066 P23141  | carboxyles Enzyme       | 80   | 0.59  | 0.692 | 3.32E-15 | 0.02 |
| Non-alcoholic Fatty C0400966 | CORIN     | 10699 Q9Y5Q5 | corin, serine peptidase | 55   | 0.695 | 0.538 | 6.51E-35 | 0.02 |
| Non-alcoholic Fatty C0400966 | CCL27     | 10850 Q9Y4X3 | C-C motif Signaling     | 185  | 0.502 | 0.846 | 0.013511 | 0.02 |
| Non-alcoholic Fatty C0400966 | MTMR11    | 10903 A4FU01 | myotubular Enzyme       | 32   | 0.691 | 0.538 | 4.77E-23 | 0.02 |
| Non-alcoholic Fatty C0400966 | CHIT1     | 1118 Q13231  | chitinase 1             | 142  | 0.525 | 0.692 | 7.17E-16 | 0.02 |

|                              |         |       |        |                         |      |       |       |          |      |
|------------------------------|---------|-------|--------|-------------------------|------|-------|-------|----------|------|
| Non-alcoholic Fatty C0400966 | ECD     | 11319 | O95905 | ecdysoneless cell cycl  | 40   | 0.656 | 0.538 | 2.34E-12 | 0.02 |
| Non-alcoholic Fatty C0400966 | C1QTNF1 | ##### | Q9BXJ1 | C1q and TNF related     | 27   | 0.7   | 0.346 | 0.000424 | 0.02 |
| Non-alcoholic Fatty C0400966 | LYPLAL1 | ##### | Q5VWZ2 | lysophospholipase like  | 8    | 0.821 | 0.192 | 2.64E-05 | 0.02 |
| Non-alcoholic Fatty C0400966 | BHLHE23 | ##### | Q8NDY6 | basic helix Enzyme      | 22   | 0.722 | 0.385 | 0.19596  | 0.02 |
| Non-alcoholic Fatty C0400966 | MAP3K8  | 1326  | P41279 | mitogen-ac Kinase       | 168  | 0.516 | 0.846 | 0.96825  | 0.02 |
| Non-alcoholic Fatty C0400966 | COX8A   | 1351  | P10176 | cytochrome Enzyme       | 526  | 0.4   | 0.846 | 0.11606  | 0.02 |
| Non-alcoholic Fatty C0400966 | GPR119  | ##### | Q8TDV5 | G protein-α G-protein α | 27   | 0.695 | 0.346 | 0.008618 | 0.02 |
| Non-alcoholic Fatty C0400966 | CYBA    | 1535  | P13498 | cytochrome b-245 alpl   | 177  | 0.52  | 0.769 | 8.87E-06 | 0.02 |
| Non-alcoholic Fatty C0400966 | CYP1A1  | 1543  | P04798 | cytochrome Enzyme       | 379  | 0.436 | 0.846 | 1.06E-17 | 0.02 |
| Non-alcoholic Fatty C0400966 | GRK2    | 156   | P25098 | G protein-α Kinase      | 159  | 0.532 | 0.654 | 0.99998  | 0.02 |
| Non-alcoholic Fatty C0400966 | CYP2D6  | 1565  | P10635 | cytochrome P450 fam     | 432  | 0.437 | 0.885 | 1.08E-25 | 0.02 |
| Non-alcoholic Fatty C0400966 | ATN1    | 1822  | P54259 | atrophin 1              | 499  | 0.409 | 0.885 | 0.99992  | 0.02 |
| Non-alcoholic Fatty C0400966 | MLKL    | ##### | Q8NB16 | mixed line Kinase       | 93   | 0.57  | 0.731 | 2.09E-14 | 0.02 |
| Non-alcoholic Fatty C0400966 | ELANE   | 1991  | P08246 | elastase, n Enzyme      | 346  | 0.447 | 0.846 | 0.001227 | 0.02 |
| Non-alcoholic Fatty C0400966 | ELAVL2  | 1993  | Q12926 | ELAV like RNA bind      | 199  | 0.486 | 0.808 | 0.99514  | 0.02 |
| Non-alcoholic Fatty C0400966 | ESR1    | 2099  | P03372 | estrogen re Nuclear re  | 1101 | 0.324 | 0.962 | 0.9992   | 0.02 |
| Non-alcoholic Fatty C0400966 | ESRRA   | 2101  | P11474 | estrogen re Nuclear re  | 112  | 0.548 | 0.654 | 0.59696  | 0.02 |
| Non-alcoholic Fatty C0400966 | ACSL4   | 2182  | O60488 | acyl-CoA α Enzyme       | 136  | 0.561 | 0.769 | 0.98103  | 0.02 |
| Non-alcoholic Fatty C0400966 | FAT1    | 2195  | Q14517 | FAT atypical cadherin   | 178  | 0.508 | 0.808 | 1.2E-12  | 0.02 |
| Non-alcoholic Fatty C0400966 | FCGR2B  | 2213  | P31994 | Fc fragmer Cell adhes   | 155  | 0.522 | 0.846 | 0.45637  | 0.02 |
| Non-alcoholic Fatty C0400966 | SIRT2   | 22933 | Q8IXJ6 | sirtuin 2 Epigenetic    | 172  | 0.51  | 0.769 | 2.33E-08 | 0.02 |
| Non-alcoholic Fatty C0400966 | FOXO3   | 2309  | O43524 | forkhead box O3         | 381  | 0.431 | 0.808 | 0.98806  | 0.02 |
| Non-alcoholic Fatty C0400966 | LPIN1   | 23175 | Q14693 | lipin 1                 | 86   | 0.601 | 0.692 | 6.45E-13 | 0.02 |
| Non-alcoholic Fatty C0400966 | MLYCD   | 23417 | O95822 | malonyl-CoA decarbo     | 79   | 0.617 | 0.769 | 0.000648 | 0.02 |
| Non-alcoholic Fatty C0400966 | FOS     | 2353  | P01100 | Fos proto-α Transcripti | 528  | 0.411 | 0.885 | 0.26176  | 0.02 |
| Non-alcoholic Fatty C0400966 | ALOX12  | 239   | P18054 | arachidona Enzyme       | 119  | 0.558 | 0.692 | 1.44E-15 | 0.02 |
| Non-alcoholic Fatty C0400966 | ALOX5   | 240   | P09917 | arachidona Enzyme       | 342  | 0.447 | 0.885 | 1.21E-06 | 0.02 |
| Non-alcoholic Fatty C0400966 | ALOX15  | 246   | P16050 | arachidona Enzyme       | 205  | 0.502 | 0.846 | 1.14E-23 | 0.02 |
| Non-alcoholic Fatty C0400966 | ALPP    | 250   | P05187 | alkaline ph Enzyme      | 209  | 0.487 | 0.808 | 1.81E-13 | 0.02 |
| Non-alcoholic Fatty C0400966 | FNDC5   | ##### | Q8NAU1 | fibronectin type III do | 61   | 0.631 | 0.538 | 0.5458   | 0.02 |
| Non-alcoholic Fatty C0400966 | ATRNL1  | 26033 | Q5VV63 | attractin like Enzyme m | 117  | 0.546 | 0.769 | 0.99915  | 0.02 |
| Non-alcoholic Fatty C0400966 | GC      | 2638  | P02774 | GC vitamin Transporte   | 219  | 0.489 | 0.885 | 2.73E-11 | 0.02 |
| Non-alcoholic Fatty C0400966 | GCGR    | 2642  | P47871 | glucagon r G-protein α  | 47   | 0.656 | 0.308 | 2.22E-06 | 0.02 |
| Non-alcoholic Fatty C0400966 | PDLIM3  | 27295 | Q53GG5 | PDZ and L Cellular st   | 118  | 0.547 | 0.769 | 3.03E-07 | 0.02 |
| Non-alcoholic Fatty C0400966 | GLUL    | 2752  | P15104 | glutamate- Enzyme       | 200  | 0.513 | 0.731 | 0.9957   | 0.02 |
| Non-alcoholic Fatty C0400966 | SLC13A5 | ##### | Q86YT5 | solute carri Transporte | 106  | 0.608 | 0.577 | 0.000506 | 0.02 |
| Non-alcoholic Fatty C0400966 | GRN     | 2896  | P28799 | granulin precursor      | 412  | 0.435 | 0.846 | 0.069666 | 0.02 |
| Non-alcoholic Fatty C0400966 | SETD2   | 29072 | Q9BYW2 | SET doma Epigenetic     | 447  | 0.424 | 0.846 | 1        | 0.02 |
| Non-alcoholic Fatty C0400966 | NR3C1   | 2908  | P04150 | nuclear rec Nuclear re  | 590  | 0.393 | 0.885 | 0.96958  | 0.02 |

|                              |           |                   |                         |      |       |       |          |      |
|------------------------------|-----------|-------------------|-------------------------|------|-------|-------|----------|------|
| Non-alcoholic Fatty C0400966 | TBK1      | 29110 Q9UHD2      | TANK bin Kinase         | 207  | 0.513 | 0.846 | 0.075174 | 0.02 |
| Non-alcoholic Fatty C0400966 | PDIA3     | 2923 P30101       | protein disulfide isom  | 100  | 0.566 | 0.769 | 0.99608  | 0.02 |
| Non-alcoholic Fatty C0400966 | FOXA1     | 3169 P55317       | forkhead b Transcrip    | 138  | 0.522 | 0.731 | 0.22227  | 0.02 |
| Non-alcoholic Fatty C0400966 | ACACB     | 32 O00763         | acetyl-CoA carboxyla    | 49   | 0.644 | 0.654 | 7.65E-47 | 0.02 |
| Non-alcoholic Fatty C0400966 | HSPA1A    | 3303 P0DMV8;P0DMV | heat shock protein fan  | 229  | 0.486 | 0.769 | 0.030228 | 0.02 |
| Non-alcoholic Fatty C0400966 | HSPA1B    | 3304 P0DMV8;P0DMV | heat shock protein fan  | 251  | 0.474 | 0.808 | 0.005346 | 0.02 |
| Non-alcoholic Fatty C0400966 | HSP90AA1  | 3320 P07900       | heat shock Chaperone    | 455  | 0.411 | 0.923 | 0.86025  | 0.02 |
| Non-alcoholic Fatty C0400966 | FFAR4     | ##### Q5NUL3      | free fatty acid recepto | 67   | 0.621 | 0.577 | 1.36E-05 | 0.02 |
| Non-alcoholic Fatty C0400966 | IDH2      | 3418 P48735       | isocitrate dehydrogen   | 380  | 0.434 | 0.808 | 0.88271  | 0.02 |
| Non-alcoholic Fatty C0400966 | IRGM      | ##### A1A4Y4      | immunity related GTF    | 57   | 0.617 | 0.538 |          | 0.02 |
| Non-alcoholic Fatty C0400966 | IGFALS    | 3483 P35858       | insulin like Receptor   | 203  | 0.511 | 0.846 | 5.44E-11 | 0.02 |
| Non-alcoholic Fatty C0400966 | CXCL8     | 3576 P10145       | C-X-C mo' Signaling     | 1254 | 0.31  | 0.962 | 0.000274 | 0.02 |
| Non-alcoholic Fatty C0400966 | INS       | 3630 P01308       | insulin                 | 405  | 0.445 | 0.923 | 0.30091  | 0.02 |
| Non-alcoholic Fatty C0400966 | AQP9      | 366 O43315        | aquaporin ' Ion channe  | 100  | 0.565 | 0.808 | 0.24027  | 0.02 |
| Non-alcoholic Fatty C0400966 | AR        | 367 P10275        | androgen r Nuclear re   | 854  | 0.351 | 0.846 | 0.98837  | 0.02 |
| Non-alcoholic Fatty C0400966 | ENHO      | ##### Q6UWT2      | energy homeostasis as   | 71   | 0.599 | 0.769 | 0.10526  | 0.02 |
| Non-alcoholic Fatty C0400966 | LCN2      | 3934 P80188       | lipocalin 2 Enzyme      | 497  | 0.405 | 0.885 | 1.14E-09 | 0.02 |
| Non-alcoholic Fatty C0400966 | LECT2     | 3950 O14960       | leukocyte c' Signaling  | 47   | 0.653 | 0.5   | 0.001481 | 0.02 |
| Non-alcoholic Fatty C0400966 | MIR126    | #####             | microRNA 126            | 305  | 0.447 | 0.846 |          | 0.02 |
| Non-alcoholic Fatty C0400966 | MIR149    | #####             | microRNA 149            | 140  | 0.524 | 0.769 |          | 0.02 |
| Non-alcoholic Fatty C0400966 | MIR20A    | #####             | microRNA 20a            | 180  | 0.498 | 0.769 |          | 0.02 |
| Non-alcoholic Fatty C0400966 | MIR200C   | #####             | microRNA 200c           | 202  | 0.486 | 0.846 |          | 0.02 |
| Non-alcoholic Fatty C0400966 | MIR222    | #####             | microRNA 222            | 210  | 0.486 | 0.808 |          | 0.02 |
| Non-alcoholic Fatty C0400966 | MAS1      | 4142 P04201       | MAS1 pro G-protein c    | 142  | 0.533 | 0.769 | 8.25E-05 | 0.02 |
| Non-alcoholic Fatty C0400966 | MC4R      | 4160 P32245       | melanocort G-protein c  | 149  | 0.535 | 0.692 | 0.000917 | 0.02 |
| Non-alcoholic Fatty C0400966 | MMP13     | 4322 P45452       | matrix met Enzyme       | 328  | 0.452 | 0.923 | 7.88E-18 | 0.02 |
| Non-alcoholic Fatty C0400966 | PLIN5     | ##### Q00G26      | perilipin 5             | 27   | 0.695 | 0.346 | 1.05E-11 | 0.02 |
| Non-alcoholic Fatty C0400966 | MUC1      | 4582 P15941       | mucin 1, cell surface c | 594  | 0.384 | 0.885 | 0.018774 | 0.02 |
| Non-alcoholic Fatty C0400966 | ATF3      | 467 P18847        | activating ' Transcrip  | 228  | 0.494 | 0.885 | 0.089296 | 0.02 |
| Non-alcoholic Fatty C0400966 | ATHS      | 470               | atherosclerosis suscep  | 112  | 0.551 | 0.769 |          | 0.02 |
| Non-alcoholic Fatty C0400966 | CCN3      | 4856 P48745       | cellular co' Signaling  | 117  | 0.554 | 0.615 | 0.006644 | 0.02 |
| Non-alcoholic Fatty C0400966 | MIR375    | #####             | microRNA 375            | 226  | 0.476 | 0.769 |          | 0.02 |
| Non-alcoholic Fatty C0400966 | TNFRSF11B | 4982 O00300       | TNF receptor superfam   | 443  | 0.422 | 0.808 | 0.16171  | 0.02 |
| Non-alcoholic Fatty C0400966 | IL22      | 50616 Q9GZX6      | interleukin 22          | 551  | 0.393 | 0.885 | 0.000188 | 0.02 |
| Non-alcoholic Fatty C0400966 | ACOX1     | 51 Q15067         | acyl-CoA c' Enzyme      | 95   | 0.61  | 0.731 | 0.062095 | 0.02 |
| Non-alcoholic Fatty C0400966 | ADIPOR1   | 51094 Q96A54      | adiponectin Receptor    | 148  | 0.529 | 0.808 | 0.6584   | 0.02 |
| Non-alcoholic Fatty C0400966 | CRNKL1    | 51340 Q9BZJ0      | crooked ne Nucleic ac   | 24   | 0.711 | 0.385 | 2.72E-06 | 0.02 |
| Non-alcoholic Fatty C0400966 | HSD17B7   | 51478 P56937      | hydroxysteroid 17-bet   | 81   | 0.582 | 0.5   | 6.65E-06 | 0.02 |
| Non-alcoholic Fatty C0400966 | GDE1      | 51573 Q9NZC3      | glycerophosphodiester   | 228  | 0.481 | 0.808 | 6.12E-06 | 0.02 |

|                              |         |              |                               |      |       |       |          |      |
|------------------------------|---------|--------------|-------------------------------|------|-------|-------|----------|------|
| Non-alcoholic Fatty C0400966 | ENPP1   | 5167 P22413  | ectonucleo Enzyme             | 247  | 0.498 | 0.808 | 4.99E-08 | 0.02 |
| Non-alcoholic Fatty C0400966 | LUC7L3  | 51747 O95232 | LUC7 like 3 pre-mRN           | 26   | 0.691 | 0.5   | 0.99999  | 0.02 |
| Non-alcoholic Fatty C0400966 | FAM3B   | 54097 P58499 | FAM3 metabolism re            | 38   | 0.682 | 0.385 | 2.43E-08 | 0.02 |
| Non-alcoholic Fatty C0400966 | UGT1A1  | 54658 P22309 | UDP glucuronosyltrar          | 302  | 0.464 | 0.769 | 3.26E-06 | 0.02 |
| Non-alcoholic Fatty C0400966 | ELOVL2  | 54898 Q9NXB9 | ELOVL fa Enzyme               | 26   | 0.722 | 0.423 | 8.37E-10 | 0.02 |
| Non-alcoholic Fatty C0400966 | AVP     | 551 P01185   | arginine v $\alpha$ Signaling | 454  | 0.437 | 0.846 | 0.074413 | 0.02 |
| Non-alcoholic Fatty C0400966 | NAT10   | 55226 Q9H0A0 | N-acetyltransferase 10        | 133  | 0.536 | 0.769 | 4.12E-22 | 0.02 |
| Non-alcoholic Fatty C0400966 | PTPA    | 5524 Q15257  | protein ph $\alpha$ Enzyme m  | 245  | 0.48  | 0.846 | 0.99057  | 0.02 |
| Non-alcoholic Fatty C0400966 | MEG3    | 55384        | maternally expressed          | 239  | 0.471 | 0.846 |          | 0.02 |
| Non-alcoholic Fatty C0400966 | MAPK1   | 5594 P28482  | mitogen-ac Kinase             | 1059 | 0.33  | 0.923 | 0.99698  | 0.02 |
| Non-alcoholic Fatty C0400966 | MYDGF   | 56005 Q969H8 | myeloid derived grow          | 295  | 0.451 | 0.846 | 3.49E-06 | 0.02 |
| Non-alcoholic Fatty C0400966 | AZGP1   | 563 P25311   | alpha-2-glycoprotein          | 101  | 0.566 | 0.769 | 4.15E-06 | 0.02 |
| Non-alcoholic Fatty C0400966 | PRTN3   | 5657 P24158  | proteinase Enzyme             | 215  | 0.503 | 0.808 | 3.8E-05  | 0.02 |
| Non-alcoholic Fatty C0400966 | PTGS1   | 5742 P23219  | prostaglan $\alpha$ Enzyme    | 318  | 0.46  | 0.885 | 6.24E-07 | 0.02 |
| Non-alcoholic Fatty C0400966 | MIR146B | #####        | microRNA 146b                 | 187  | 0.496 | 0.769 |          | 0.02 |
| Non-alcoholic Fatty C0400966 | PTPN1   | 5770 P18031  | protein tyrosine phosp        | 169  | 0.523 | 0.731 | 0.81293  | 0.02 |
| Non-alcoholic Fatty C0400966 | NLRC4   | 58484 Q9NPP4 | NLR family CARD do            | 145  | 0.556 | 0.769 | 9.87E-12 | 0.02 |
| Non-alcoholic Fatty C0400966 | BCAT1   | 586 P54687   | branched c Enzyme             | 62   | 0.606 | 0.538 | 3.8E-08  | 0.02 |
| Non-alcoholic Fatty C0400966 | MOK     | 5891 Q9UQ07  | MOK prot $\alpha$ Kinase      | 251  | 0.476 | 0.769 | 8.84E-22 | 0.02 |
| Non-alcoholic Fatty C0400966 | FAM3A   | 60343 P98173 | FAM3 metabolism re            | 8    | 0.805 | 0.269 | 0.66899  | 0.02 |
| Non-alcoholic Fatty C0400966 | ROCK1   | 6093 Q13464  | Rho associ Kinase             | 157  | 0.513 | 0.731 | 1        | 0.02 |
| Non-alcoholic Fatty C0400966 | HCC     | #####        | thyroid carcinoma, Hu         | 45   | 0.644 | 0.423 |          | 0.02 |
| Non-alcoholic Fatty C0400966 | S100A8  | 6279 P05109  | S100 calci $\alpha$ Calcium-b | 369  | 0.43  | 0.962 | 0.13761  | 0.02 |
| Non-alcoholic Fatty C0400966 | CEACAM1 | 634 P13688   | CEA cell adhesion mc          | 167  | 0.525 | 0.731 | 0.000788 | 0.02 |
| Non-alcoholic Fatty C0400966 | SCP2    | 6342 P22307  | sterol carrier protein 2      | 50   | 0.644 | 0.5   | 8.75E-07 | 0.02 |
| Non-alcoholic Fatty C0400966 | CCL20   | 6364 P78556  | C-C motif Signaling           | 242  | 0.474 | 0.846 | 0.000242 | 0.02 |
| Non-alcoholic Fatty C0400966 | SELPLG  | 6404 Q14242  | selectin P ligand             | 113  | 0.564 | 0.692 | 0.1768   | 0.02 |
| Non-alcoholic Fatty C0400966 | ABCG5   | 64240 Q9H222 | ATP bindi $\alpha$ Transporte | 108  | 0.592 | 0.577 | 3.08E-21 | 0.02 |
| Non-alcoholic Fatty C0400966 | IL25    | 64806 Q9H293 | interleukin 25                | 139  | 0.529 | 0.846 | 0.000923 | 0.02 |
| Non-alcoholic Fatty C0400966 | SLC2A1  | 6513 P11166  | solute carri Transporte       | 687  | 0.388 | 0.808 | 0.9941   | 0.02 |
| Non-alcoholic Fatty C0400966 | SLC2A2  | 6514 P11168  | solute carri Transporte       | 123  | 0.572 | 0.692 | 3.43E-08 | 0.02 |
| Non-alcoholic Fatty C0400966 | NCF1    | ##### P14598 | neutrophil cytosolic fa       | 170  | 0.521 | 0.808 | 2.83E-05 | 0.02 |
| Non-alcoholic Fatty C0400966 | SLPI    | 6590 P03973  | secretory l $\alpha$ Enzyme m | 310  | 0.449 | 0.846 | 0.000897 | 0.02 |
| Non-alcoholic Fatty C0400966 | SPARC   | 6678 P09486  | secreted pr Signaling         | 344  | 0.445 | 0.846 | 0.89148  | 0.02 |
| Non-alcoholic Fatty C0400966 | SPINK1  | 6690 P00995  | serine peptidase inhib        | 216  | 0.492 | 0.808 | 0.31476  | 0.02 |
| Non-alcoholic Fatty C0400966 | SPTBN1  | 6711 Q01082  | spectrin beta, non-eryt       | 76   | 0.619 | 0.538 | 1        | 0.02 |
| Non-alcoholic Fatty C0400966 | STAT5A  | 6776 P42229  | signal tran: Nucleic ac       | 318  | 0.445 | 0.808 | 0.99994  | 0.02 |
| Non-alcoholic Fatty C0400966 | STAT5B  | 6777 P51692  | signal tran: Nucleic ac       | 357  | 0.442 | 0.808 | 0.99988  | 0.02 |
| Non-alcoholic Fatty C0400966 | TEK     | 7010 Q02763  | TEK recep Kinase              | 300  | 0.462 | 0.692 | 1        | 0.02 |

|                              |              |              |                          |     |       |       |          |      |
|------------------------------|--------------|--------------|--------------------------|-----|-------|-------|----------|------|
| Non-alcoholic Fatty C0400966 | TRPV1        | 7442 Q8NER1  | transient re Ion channe  | 404 | 0.446 | 0.885 | 1.01E-16 | 0.02 |
| Non-alcoholic Fatty C0400966 | DHRS11       | 79154 Q6UWP2 | dehydroge Enzyme         | 43  | 0.653 | 0.423 | 2.24E-06 | 0.02 |
| Non-alcoholic Fatty C0400966 | STEAP4       | 79689 Q687X5 | STEAP4 metalloreduc      | 34  | 0.686 | 0.462 | 1.2E-07  | 0.02 |
| Non-alcoholic Fatty C0400966 | CALCR        | 799 P30988   | calcitonin 1 G-protein c | 282 | 0.464 | 0.846 | 3.12E-09 | 0.02 |
| Non-alcoholic Fatty C0400966 | ASRGL1       | 80150 Q7L266 | asparagina Enzyme        | 205 | 0.494 | 0.808 | 2.76E-05 | 0.02 |
| Non-alcoholic Fatty C0400966 | CASP3        | 836 P42574   | caspase 3 Enzyme         | 819 | 0.351 | 0.923 | 0.10017  | 0.02 |
| Non-alcoholic Fatty C0400966 | CASP8        | 841 Q14790   | caspase 8 Enzyme         | 480 | 0.404 | 0.923 | 3.72E-06 | 0.02 |
| Non-alcoholic Fatty C0400966 | ORAI1        | 84876 Q96D31 | ORAI calc Ion channe     | 195 | 0.52  | 0.808 | 1.91E-05 | 0.02 |
| Non-alcoholic Fatty C0400966 | TNFSF11      | 8600 O14788  | TNF super Signaling      | 327 | 0.453 | 0.846 | 0.004916 | 0.02 |
| Non-alcoholic Fatty C0400966 | SOCS1        | 8651 O15524  | suppressor Enzyme m      | 315 | 0.445 | 0.808 | 0.58544  | 0.02 |
| Non-alcoholic Fatty C0400966 | CBR1         | 873 P16152   | carbonyl reductase 1     | 100 | 0.572 | 0.654 | 6.28E-05 | 0.02 |
| Non-alcoholic Fatty C0400966 | RIPK1        | 8737 Q13546  | receptor in Kinase       | 250 | 0.479 | 0.769 | 0.007944 | 0.02 |
| Non-alcoholic Fatty C0400966 | CCN4         | 8840 O95388  | cellular co Signaling    | 114 | 0.554 | 0.692 | 6.39E-07 | 0.02 |
| Non-alcoholic Fatty C0400966 | APLN         | 8862 Q9ULZ1  | apelin                   | 226 | 0.497 | 0.769 | 0.45897  | 0.02 |
| Non-alcoholic Fatty C0400966 | SELENBP1     | 8991 Q13228  | selenium b Immune re     | 214 | 0.493 | 0.846 | 3.23E-16 | 0.02 |
| Non-alcoholic Fatty C0400966 | SOCS3        | 9021 O14543  | suppressor Enzyme m      | 375 | 0.434 | 0.808 | 0.74613  | 0.02 |
| Non-alcoholic Fatty C0400966 | USP10        | 9100 Q14694  | ubiquitin s Enzyme       | 40  | 0.663 | 0.462 | 0.99411  | 0.02 |
| Non-alcoholic Fatty C0400966 | CD5L         | 922 O43866   | CD5 mole Enzyme          | 78  | 0.593 | 0.846 | 4.23E-17 | 0.02 |
| Non-alcoholic Fatty C0400966 | CD163        | 9332 Q86VB7  | CD163 mo Enzyme          | 369 | 0.427 | 0.846 | 0.000834 | 0.02 |
| Non-alcoholic Fatty C0400966 | PPIG         | 9360 Q13427  | peptidylprolyl isomerz   | 203 | 0.497 | 0.846 | 0.96292  | 0.02 |
| Non-alcoholic Fatty C0400966 | CD68         | 968 P34810   | CD68 mol Transporte      | 452 | 0.408 | 0.808 | 1.41E-06 | 0.02 |
| Non-alcoholic Fatty C0400966 | MIR873       | #####        | microRNA 873             | 67  | 0.601 | 0.538 |          | 0.01 |
| Non-alcoholic Fatty C0400966 | MIR190B      | #####        | microRNA 190b            | 22  | 0.722 | 0.385 |          | 0.01 |
| Non-alcoholic Fatty C0400966 | CD24         | ##### P25063 | CD24 molecule            | 244 | 0.472 | 0.769 |          | 0.01 |
| Non-alcoholic Fatty C0400966 | MIR1224      | #####        | microRNA 1224            | 36  | 0.666 | 0.385 |          | 0.01 |
| Non-alcoholic Fatty C0400966 | PARP2        | 10038 Q9UGN5 | poly(ADP-ribose) pol     | 40  | 0.663 | 0.538 | 2.33E-13 | 0.01 |
| Non-alcoholic Fatty C0400966 | LOC100505909 | #####        | histidine-rich glycopro  | 17  | 0.722 | 0.385 |          | 0.01 |
| Non-alcoholic Fatty C0400966 | OCLN         | ##### Q16625 | occludin                 | 195 | 0.507 | 0.846 | 8.56E-07 | 0.01 |
| Non-alcoholic Fatty C0400966 | DNM1L        | 10059 O00429 | dynamin 1 Enzyme m       | 273 | 0.475 | 0.808 | 0.000568 | 0.01 |
| Non-alcoholic Fatty C0400966 | ERVK-2       | #####        | endogenous retrovirus    | 37  | 0.674 | 0.423 |          | 0.01 |
| Non-alcoholic Fatty C0400966 | PARTICL      | #####        | promoter of MAT2A i      | 9   | 0.792 | 0.269 |          | 0.01 |
| Non-alcoholic Fatty C0400966 | PPIF         | 10105 P30405 | peptidylprolyl isomerz   | 78  | 0.593 | 0.692 | 0.001992 | 0.01 |
| Non-alcoholic Fatty C0400966 | IFNL4        | ##### K9M1U5 | interferon lambda 4 (g   | 39  | 0.67  | 0.577 |          | 0.01 |
| Non-alcoholic Fatty C0400966 | LRPPRC       | 10128 P42704 | leucine rich pentatricc  | 220 | 0.493 | 0.769 | 2.3E-10  | 0.01 |
| Non-alcoholic Fatty C0400966 | SLC25A13     | 10165 Q9UJS0 | solute carri Transporte  | 109 | 0.617 | 0.5   | 1.28E-24 | 0.01 |
| Non-alcoholic Fatty C0400966 | CDK4         | 1019 P11802  | cyclin dep Kinase        | 433 | 0.412 | 0.808 | 0.062909 | 0.01 |
| Non-alcoholic Fatty C0400966 | B4GALT1-AS1  | #####        | B4GALT1 antisense I      | 13  | 0.792 | 0.192 |          | 0.01 |
| Non-alcoholic Fatty C0400966 | PRMT3        | 10196 O60678 | protein arg Epigenetic   | 17  | 0.743 | 0.423 | 4.9E-25  | 0.01 |
| Non-alcoholic Fatty C0400966 | PLIN3        | 10226 O60664 | perilipin 3 Transporte   | 14  | 0.736 | 0.423 | 1.18E-07 | 0.01 |

|                              |              |                    |                                                   |      |       |       |          |      |
|------------------------------|--------------|--------------------|---------------------------------------------------|------|-------|-------|----------|------|
| Non-alcoholic Fatty C0400966 | CDK8         | 1024 P49336        | cyclin dependent Kinase                           | 82   | 0.597 | 0.654 | 0.40964  | 0.01 |
| Non-alcoholic Fatty C0400966 | FSTL3        | 10272 O95633       | follicle-stimulating hormone-like Enzyme          | 33   | 0.695 | 0.423 | 0.68658  | 0.01 |
| Non-alcoholic Fatty C0400966 | CDKN2A       | 1029 P42771;Q8N726 | cyclin dependent kinase                           | 1314 | 0.3   | 0.885 | 0.39474  | 0.01 |
| Non-alcoholic Fatty C0400966 | ZNF267       | 10308 Q14586       | zinc finger protein 267                           | 15   | 0.769 | 0.192 | 0.017108 | 0.01 |
| Non-alcoholic Fatty C0400966 | AKR1A1       | 10327 P14550       | aldo-keto reductase Enzyme                        | 185  | 0.51  | 0.846 | 6.66E-07 | 0.01 |
| Non-alcoholic Fatty C0400966 | MERTK        | 10461 Q12866       | MER proto-oncogene Kinase                         | 154  | 0.531 | 0.692 | 2.66E-11 | 0.01 |
| Non-alcoholic Fatty C0400966 | CAP1         | 10487 Q01518       | cyclase associated Cellular stress                | 149  | 0.529 | 0.808 | 0.019817 | 0.01 |
| Non-alcoholic Fatty C0400966 | STK25        | 10494 O00506       | serine/threonine Kinase                           | 29   | 0.7   | 0.346 | 0.051875 | 0.01 |
| Non-alcoholic Fatty C0400966 | NCOA2        | 10499 Q15596       | nuclear coactivator Enzyme                        | 95   | 0.575 | 0.615 | 1        | 0.01 |
| Non-alcoholic Fatty C0400966 | ATG7         | 10533 O95352       | autophagy Enzyme                                  | 179  | 0.505 | 0.769 | 7.38E-12 | 0.01 |
| Non-alcoholic Fatty C0400966 | LINC01684    | #####              | long intergenic non-protein coding RNA            | 2    | 1     | 0.038 |          | 0.01 |
| Non-alcoholic Fatty C0400966 | PRDX4        | 10549 Q13162       | peroxiredoxin Enzyme                              | 59   | 0.619 | 0.692 | 0.026755 | 0.01 |
| Non-alcoholic Fatty C0400966 | CEL          | 1056 P19835        | carboxyl ester lipase                             | 172  | 0.514 | 0.808 | 1.54E-06 | 0.01 |
| Non-alcoholic Fatty C0400966 | SORBS1       | 10580 Q9BX66       | sorbin and SH3 domain containing protein          | 124  | 0.554 | 0.769 | 1.53E-12 | 0.01 |
| Non-alcoholic Fatty C0400966 | AHSA1        | 10598 O95433       | activator of HSP90 family class B member          | 526  | 0.396 | 0.923 | 0.99896  | 0.01 |
| Non-alcoholic Fatty C0400966 | ERLIN1       | 10613 O75477       | ER lipid raft associated protein                  | 33   | 0.736 | 0.308 | 0.17751  | 0.01 |
| Non-alcoholic Fatty C0400966 | CAMKK2       | 10645 Q96RR4       | calcium/calmodulin dependent Kinase               | 62   | 0.617 | 0.654 | 0.091625 | 0.01 |
| Non-alcoholic Fatty C0400966 | CXCR6        | 10663 O00574       | C-X-C motif containing G-protein coupled receptor | 325  | 0.448 | 0.885 | 5.72E-05 | 0.01 |
| Non-alcoholic Fatty C0400966 | SIRT1-AS     | #####              | SIRT1 antisense RNA                               | 44   | 0.67  | 0.615 |          | 0.01 |
| Non-alcoholic Fatty C0400966 | TNFSF13B     | 10673 Q9Y275       | TNF superfamily member 13B                        | 282  | 0.46  | 0.731 | 0.98193  | 0.01 |
| Non-alcoholic Fatty C0400966 | EBP          | 10682 Q15125       | EBP cholesteryl Enzyme                            | 243  | 0.494 | 0.846 | 0.93645  | 0.01 |
| Non-alcoholic Fatty C0400966 | YME1L1       | 10730 Q96TA2       | YME1 like Enzyme                                  | 60   | 0.633 | 0.654 | 0.028988 | 0.01 |
| Non-alcoholic Fatty C0400966 | PLK4         | 10733 O00444       | polo like kinase Kinase                           | 135  | 0.551 | 0.731 | 7.08E-06 | 0.01 |
| Non-alcoholic Fatty C0400966 | HPSE         | 10855 Q9Y251       | heparanase Enzyme                                 | 393  | 0.425 | 0.808 | 2.27E-14 | 0.01 |
| Non-alcoholic Fatty C0400966 | PGRMC1       | 10857 O00264       | progesterone dependent Signaling                  | 79   | 0.588 | 0.654 | 0.6711   | 0.01 |
| Non-alcoholic Fatty C0400966 | NMU          | 10874 P48645       | neuromedin U                                      | 68   | 0.61  | 0.808 | 0.000415 | 0.01 |
| Non-alcoholic Fatty C0400966 | TMED2        | 10959 Q15363       | transmembrane Transporter                         | 73   | 0.61  | 0.692 | 0.89231  | 0.01 |
| Non-alcoholic Fatty C0400966 | SLC27A2      | 11001 O14975       | solute carrier Transporter                        | 27   | 0.7   | 0.462 | 6.36E-09 | 0.01 |
| Non-alcoholic Fatty C0400966 | LILRB4       | 11006 Q8NHJ6       | leukocyte inhibitory Receptor                     | 46   | 0.659 | 0.423 | 4.71E-13 | 0.01 |
| Non-alcoholic Fatty C0400966 | RIPK3        | 11035 Q9Y572       | receptor interacting protein Kinase               | 196  | 0.497 | 0.885 | 1.19E-14 | 0.01 |
| Non-alcoholic Fatty C0400966 | LOC110806263 | #####              | TERT 5' regulatory region                         | 245  | 0.464 | 0.731 |          | 0.01 |
| Non-alcoholic Fatty C0400966 | ADAMTS13     | 11093 Q76LX8       | ADAM metalloprotease Enzyme                       | 229  | 0.496 | 0.769 | 5.14E-15 | 0.01 |
| Non-alcoholic Fatty C0400966 | TREH         | 11181 O43280       | trehalase                                         | 42   | 0.67  | 0.654 | 8.96E-15 | 0.01 |
| Non-alcoholic Fatty C0400966 | LNCARSR      | #####              | lncRNA regulator of transcription                 | 19   | 0.722 | 0.269 |          | 0.01 |
| Non-alcoholic Fatty C0400966 | DUSP12       | 11266 Q9UNI6       | dual specificity phosphatase                      | 17   | 0.78  | 0.269 | 0.000139 | 0.01 |
| Non-alcoholic Fatty C0400966 | CHRM3        | 1131 P20309        | cholinergic G-protein coupled receptor            | 284  | 0.464 | 0.885 | 0.99253  | 0.01 |
| Non-alcoholic Fatty C0400966 | VSIG4        | 11326 Q9Y279       | V-set and immunoglobulin domain containing        | 51   | 0.628 | 0.615 | 1.5E-09  | 0.01 |
| Non-alcoholic Fatty C0400966 | MGLL         | 11343 Q99685       | monoglyceride Enzyme                              | 125  | 0.564 | 0.731 | 0.020016 | 0.01 |
| Non-alcoholic Fatty C0400966 | TXNRD3       | ##### Q86VQ6       | thioredoxin Enzyme                                | 37   | 0.653 | 0.615 | 8.34E-08 | 0.01 |



|                              |          |                      |                           |     |       |       |          |      |
|------------------------------|----------|----------------------|---------------------------|-----|-------|-------|----------|------|
| Non-alcoholic Fatty C0400966 | CHUK     | 1147 O15111          | component Kinase          | 125 | 0.556 | 0.731 | 0.99403  | 0.01 |
| Non-alcoholic Fatty C0400966 | C1QTNF3  | ##### Q9BXJ4         | C1q and TNF related       | 26  | 0.695 | 0.577 | 1.81E-07 | 0.01 |
| Non-alcoholic Fatty C0400966 | CIDEA    | 1149 O60543          | cell death inducing DI    | 16  | 0.751 | 0.269 | 5.58E-06 | 0.01 |
| Non-alcoholic Fatty C0400966 | H3P10    | #####                | H3 histone pseudogen      | 769 | 0.35  | 0.846 |          | 0.01 |
| Non-alcoholic Fatty C0400966 | TWIST2   | ##### Q8WVJ9         | twist famil Transcripti   | 198 | 0.518 | 0.731 | 0.56004  | 0.01 |
| Non-alcoholic Fatty C0400966 | CLCN2    | 1181 P51788          | chloride vc Ion channe    | 67  | 0.626 | 0.462 | 5.55E-12 | 0.01 |
| Non-alcoholic Fatty C0400966 | IFTAP    | ##### Q86VG3         | intraflagellar transport  | 2   | 0.931 | 0.154 | 7.61E-06 | 0.01 |
| Non-alcoholic Fatty C0400966 | CYP2R1   | ##### Q6VVX0         | cytochrome P450 fam       | 139 | 0.563 | 0.731 | 3.79E-10 | 0.01 |
| Non-alcoholic Fatty C0400966 | CPT1C    | ##### Q8TCG5         | carnitine p Enzyme        | 51  | 0.691 | 0.5   | 2.19E-09 | 0.01 |
| Non-alcoholic Fatty C0400966 | CNR2     | 1269 P34972          | cannabinoid G-protein c   | 197 | 0.509 | 0.846 | 6.54E-06 | 0.01 |
| Non-alcoholic Fatty C0400966 | COL3A1   | 1281 P02461          | collagen type III alpha   | 301 | 0.477 | 0.808 | 1        | 0.01 |
| Non-alcoholic Fatty C0400966 | SLC31A1  | 1317 O15431          | solute carrier Transporte | 71  | 0.612 | 0.577 | 0.065398 | 0.01 |
| Non-alcoholic Fatty C0400966 | ADM      | 133 P35318           | adrenomed Signaling       | 405 | 0.436 | 0.808 | 0.040831 | 0.01 |
| Non-alcoholic Fatty C0400966 | PPARGC1B | ##### Q86YN6         | PPARG co Transcripti      | 102 | 0.569 | 0.731 | 0.50321  | 0.01 |
| Non-alcoholic Fatty C0400966 | NADK2    | ##### Q4G0N4         | NAD kinase Kinase         | 42  | 0.691 | 0.346 | 0.065215 | 0.01 |
| Non-alcoholic Fatty C0400966 | CP       | 1356 P00450          | ceruloplasmin Enzyme      | 283 | 0.466 | 0.846 | 4.2E-10  | 0.01 |
| Non-alcoholic Fatty C0400966 | CPN1     | 1369 P15169          | carboxypeptidase N su     | 31  | 0.729 | 0.423 | 8.7E-08  | 0.01 |
| Non-alcoholic Fatty C0400966 | CPOX     | 1371 P36551          | coproporph Enzyme         | 246 | 0.488 | 0.846 | 0.17152  | 0.01 |
| Non-alcoholic Fatty C0400966 | CPS1     | 1373 P31327          | carbamoyl- Enzyme         | 133 | 0.59  | 0.615 | 1.09E-09 | 0.01 |
| Non-alcoholic Fatty C0400966 | CREB1    | 1385 P16220          | cAMP responsive eler      | 294 | 0.463 | 0.885 | 0.99673  | 0.01 |
| Non-alcoholic Fatty C0400966 | ATF2     | 1386 P15336          | activating 1 Transcripti  | 122 | 0.551 | 0.808 | 0.99131  | 0.01 |
| Non-alcoholic Fatty C0400966 | CREBBP   | 1387 Q92793          | CREB binding proteir      | 438 | 0.428 | 0.808 | 1        | 0.01 |
| Non-alcoholic Fatty C0400966 | CRK      | 1398 P46108          | CRK proto-oncogene,       | 544 | 0.394 | 0.923 | 0.95936  | 0.01 |
| Non-alcoholic Fatty C0400966 | CRMP1    | 1400 Q14194          | collapsin r Enzyme        | 148 | 0.525 | 0.808 | 0.99173  | 0.01 |
| Non-alcoholic Fatty C0400966 | MAPK14   | 1432 Q16539          | mitogen-ac Kinase         | 626 | 0.379 | 0.923 | 0.37466  | 0.01 |
| Non-alcoholic Fatty C0400966 | FGFBP3   | ##### Q8TAT2         | fibroblast growth fact    | 8   | 0.821 | 0.154 | 0.001028 | 0.01 |
| Non-alcoholic Fatty C0400966 | CSF3     | 1440 P09919          | colony stimulating fac    | 687 | 0.377 | 0.885 | 0.38046  | 0.01 |
| Non-alcoholic Fatty C0400966 | CSF3R    | 1441 Q99062          | colony stim Signaling     | 120 | 0.55  | 0.692 | 1.52E-10 | 0.01 |
| Non-alcoholic Fatty C0400966 | SLC38A8  | ##### A6NNN8         | solute carrier Transporte | 19  | 0.743 | 0.269 | 3.32E-24 | 0.01 |
| Non-alcoholic Fatty C0400966 | ZFP90    | ##### Q8TF47         | ZFP90 zinc Transcripti    | 13  | 0.78  | 0.231 | 0.031662 | 0.01 |
| Non-alcoholic Fatty C0400966 | CILP2    | ##### Q8IUL8         | cartilage intermediate    | 15  | 0.76  | 0.346 | 8.03E-08 | 0.01 |
| Non-alcoholic Fatty C0400966 | CTAA1    | 1483                 | cataract, anterior pola   | 106 | 0.568 | 0.731 |          | 0.01 |
| Non-alcoholic Fatty C0400966 | HJV      | ##### Q6ZVN8         | hemojuvelin BMP co-       | 71  | 0.621 | 0.654 | 0.004236 | 0.01 |
| Non-alcoholic Fatty C0400966 | CTF1     | 1489 Q16619          | cardiotrophin 1           | 60  | 0.636 | 0.423 | 0.041899 | 0.01 |
| Non-alcoholic Fatty C0400966 | CCN2     | 1490 P29279          | cellular co Signaling     | 518 | 0.399 | 0.846 | 0.000502 | 0.01 |
| Non-alcoholic Fatty C0400966 | PDIK1L   | ##### Q8N165         | PDLIM1 in Kinase          | 138 | 0.534 | 0.769 | 0.26436  | 0.01 |
| Non-alcoholic Fatty C0400966 | CTNNA1   | 1495 P35221          | catenin alp Cellular st   | 82  | 0.584 | 0.538 | 0.96962  | 0.01 |
| Non-alcoholic Fatty C0400966 | SIK1     | ##### A0A0B4J2F2;P57 | salt inducib Kinase       | 157 | 0.544 | 0.731 | 0.93716  | 0.01 |
| Non-alcoholic Fatty C0400966 | HORMAD2  | ##### Q8N7B1         | HORMA domain cont         | 22  | 0.716 | 0.385 | 7.14E-05 | 0.01 |

|                              |           |                 |                         |     |       |       |          |      |
|------------------------------|-----------|-----------------|-------------------------|-----|-------|-------|----------|------|
| Non-alcoholic Fatty C0400966 | CTRL      | 1506 P40313     | chymotryp Enzyme        | 76  | 0.599 | 0.846 | 1.1E-09  | 0.01 |
| Non-alcoholic Fatty C0400966 | CTSB      | 1508 P07858     | cathepsin I Enzyme      | 304 | 0.457 | 0.846 | 5.88E-11 | 0.01 |
| Non-alcoholic Fatty C0400966 | CTSD      | 1509 P07339     | cathepsin I Enzyme      | 242 | 0.478 | 0.846 | 0.000917 | 0.01 |
| Non-alcoholic Fatty C0400966 | CTSG      | 1511 P08311     | cathepsin I Enzyme      | 95  | 0.563 | 0.731 | 9.56E-06 | 0.01 |
| Non-alcoholic Fatty C0400966 | CTSS      | 1520 P25774     | cathepsin I Enzyme      | 131 | 0.539 | 0.731 | 0.34178  | 0.01 |
| Non-alcoholic Fatty C0400966 | ADRB2     | 154 P07550      | adrenocept G-protein c  | 387 | 0.442 | 0.923 | 0.52545  | 0.01 |
| Non-alcoholic Fatty C0400966 | SLC2A12   | ##### Q8TD20    | solute carri Transporte | 26  | 0.729 | 0.5   | 5.55E-05 | 0.01 |
| Non-alcoholic Fatty C0400966 | CYP2A6    | 1548 P11509     | cytochrome P450 fam     | 133 | 0.556 | 0.731 | 5.4E-09  | 0.01 |
| Non-alcoholic Fatty C0400966 | CYP2B6    | 1555 P20813     | cytochrome P450 fam     | 388 | 0.428 | 0.846 | 1.93E-10 | 0.01 |
| Non-alcoholic Fatty C0400966 | CYP2B7P   | 1556            | cytochrome P450 fam     | 16  | 0.76  | 0.385 |          | 0.01 |
| Non-alcoholic Fatty C0400966 | CYP2D7    | 1564 A0A087X1C5 | cytochrome P450 fam     | 42  | 0.659 | 0.577 |          | 0.01 |
| Non-alcoholic Fatty C0400966 | CYP2J2    | 1573 P51589     | cytochrome P450 fam     | 65  | 0.628 | 0.615 | 1.62E-15 | 0.01 |
| Non-alcoholic Fatty C0400966 | CYP4A11   | 1579 Q02928     | cytochrom Enzyme        | 34  | 0.695 | 0.462 | 1.09E-24 | 0.01 |
| Non-alcoholic Fatty C0400966 | CYP8B1    | 1582 Q9UNU6     | cytochrome P450 fam     | 32  | 0.711 | 0.269 | 2.06E-05 | 0.01 |
| Non-alcoholic Fatty C0400966 | CYP19A1   | 1588 P11511     | cytochrom Enzyme        | 519 | 0.41  | 0.885 | 1.7E-05  | 0.01 |
| Non-alcoholic Fatty C0400966 | CYP27B1   | 1594 O15528     | cytochrom Enzyme        | 229 | 0.502 | 0.769 | 1.92E-07 | 0.01 |
| Non-alcoholic Fatty C0400966 | CYP51A1   | 1595 Q16850     | cytochrom Enzyme        | 42  | 0.653 | 0.615 | 1.46E-07 | 0.01 |
| Non-alcoholic Fatty C0400966 | DBP       | 1628 Q10586     | D-box bind Nucleic ac   | 105 | 0.556 | 0.731 | 0.23376  | 0.01 |
| Non-alcoholic Fatty C0400966 | TMPRSS6   | ##### Q8IU80    | transmemb Enzyme        | 113 | 0.584 | 0.654 | 4.14E-10 | 0.01 |
| Non-alcoholic Fatty C0400966 | AEBP1     | 165 Q8IUX7      | AE binding protein 1    | 69  | 0.631 | 0.654 | 7.35E-11 | 0.01 |
| Non-alcoholic Fatty C0400966 | DDOST     | 1650 P39656     | dolichyl-di Enzyme      | 65  | 0.644 | 0.692 | 0.000614 | 0.01 |
| Non-alcoholic Fatty C0400966 | TIMM8A    | 1678 O60220     | translocase of inner m  | 200 | 0.51  | 0.846 | 0.65195  | 0.01 |
| Non-alcoholic Fatty C0400966 | DHCR7     | 1717 Q9UBM7     | 7-dehydro Enzyme        | 266 | 0.5   | 0.846 | 3.95E-13 | 0.01 |
| Non-alcoholic Fatty C0400966 | DIO3      | 1735 P55073     | iodothyronine deiodin   | 80  | 0.593 | 0.731 | 0.62331  | 0.01 |
| Non-alcoholic Fatty C0400966 | DMD       | 1756 P11532     | dystrophin              | 484 | 0.423 | 0.923 | 1        | 0.01 |
| Non-alcoholic Fatty C0400966 | DPYSL3    | 1809 Q14195     | dihydropyr Enzyme       | 52  | 0.628 | 0.462 | 0.99887  | 0.01 |
| Non-alcoholic Fatty C0400966 | SLC26A3   | 1811 P40879     | solute carri Transporte | 128 | 0.554 | 0.692 | 1.37E-13 | 0.01 |
| Non-alcoholic Fatty C0400966 | JAG1      | 182 P78504      | jagged canonical Notc   | 420 | 0.429 | 0.808 | 1        | 0.01 |
| Non-alcoholic Fatty C0400966 | DSPP      | 1834 Q9NZW4     | dentin sialophosphopr   | 114 | 0.556 | 0.769 | 1.12E-07 | 0.01 |
| Non-alcoholic Fatty C0400966 | DUSP9     | 1852 Q99956     | dual specificity phosp  | 26  | 0.705 | 0.308 | 0.81981  | 0.01 |
| Non-alcoholic Fatty C0400966 | EDA       | 1896 Q92838     | ectodysplasin A         | 150 | 0.553 | 0.808 | 0.97391  | 0.01 |
| Non-alcoholic Fatty C0400966 | S1PR1     | 1901 P21453     | sphingosin G-protein c  | 126 | 0.546 | 0.769 | 0.73269  | 0.01 |
| Non-alcoholic Fatty C0400966 | EEF1A1    | 1915 P68104     | eukaryotic Enzyme       | 88  | 0.584 | 0.654 | 0.97863  | 0.01 |
| Non-alcoholic Fatty C0400966 | EGF       | 1950 P01133     | epidermal growth fact   | 774 | 0.357 | 0.923 | 8.53E-17 | 0.01 |
| Non-alcoholic Fatty C0400966 | EGR1      | 1958 P18146     | early grow Nucleic ac   | 378 | 0.433 | 0.923 | 0.3509   | 0.01 |
| Non-alcoholic Fatty C0400966 | EIF4E     | 1977 P06730     | eukaryotic Nucleic ac   | 317 | 0.448 | 0.846 | 0.94133  | 0.01 |
| Non-alcoholic Fatty C0400966 | A2M       | 2 P01023        | alpha-2-mac Enzyme m    | 147 | 0.529 | 0.769 | 4.52E-11 | 0.01 |
| Non-alcoholic Fatty C0400966 | LINC01554 | ##### Q52M75    | long intergenic non-pr  | 4   | 0.931 | 0.077 | 0.076951 | 0.01 |
| Non-alcoholic Fatty C0400966 | ENO3      | 2027 P13929     | enolase 3 Enzyme        | 24  | 0.769 | 0.308 | 1.57E-19 | 0.01 |

|                              |         |              |                         |     |       |       |          |      |
|------------------------------|---------|--------------|-------------------------|-----|-------|-------|----------|------|
| Non-alcoholic Fatty C0400966 | EPHB2   | 2048 P29323  | EPH recep Kinase        | 649 | 0.374 | 0.846 | 0.99997  | 0.01 |
| Non-alcoholic Fatty C0400966 | EPHB6   | 2051 O15197  | EPH recep Kinase        | 60  | 0.619 | 0.538 | 1.2E-07  | 0.01 |
| Non-alcoholic Fatty C0400966 | EPO     | 2056 P01588  | erythropoietin          | 646 | 0.381 | 0.885 | 0.01125  | 0.01 |
| Non-alcoholic Fatty C0400966 | AKT2    | 208 P31751   | AKT serin Kinase        | 264 | 0.474 | 0.769 | 0.64432  | 0.01 |
| Non-alcoholic Fatty C0400966 | ERN1    | 2081 O75460  | endoplasm Kinase        | 163 | 0.513 | 0.808 | 0.99027  | 0.01 |
| Non-alcoholic Fatty C0400966 | ESRRB   | 2103 O95718  | estrogen re Nuclear re  | 102 | 0.565 | 0.846 | 0.12609  | 0.01 |
| Non-alcoholic Fatty C0400966 | EZH2    | 2146 Q15910  | enhancer o Epigenetic   | 653 | 0.376 | 0.885 | 1        | 0.01 |
| Non-alcoholic Fatty C0400966 | F2RL1   | 2150 P55085  | F2R like tr G-protein c | 256 | 0.48  | 0.769 | 0.000148 | 0.01 |
| Non-alcoholic Fatty C0400966 | FABP2   | 2169 P12104  | fatty acid binding prot | 65  | 0.608 | 0.654 | 0.004981 | 0.01 |
| Non-alcoholic Fatty C0400966 | FABP5   | 2171 Q01469  | fatty acid binding prot | 85  | 0.585 | 0.731 | 0.047008 | 0.01 |
| Non-alcoholic Fatty C0400966 | ACSL1   | 2180 P33121  | acyl-CoA s Enzyme       | 68  | 0.617 | 0.577 | 0.001532 | 0.01 |
| Non-alcoholic Fatty C0400966 | PTK2B   | 2185 Q14289  | protein tyr Kinase      | 319 | 0.448 | 0.808 | 0.93536  | 0.01 |
| Non-alcoholic Fatty C0400966 | UNC5B   | ##### Q8IZJ1 | unc-5 netri Receptor    | 38  | 0.682 | 0.462 | 2.69E-07 | 0.01 |
| Non-alcoholic Fatty C0400966 | FBN1    | 2200 P35555  | fibrillin 1 Calcium-b   | 552 | 0.417 | 0.846 | 1        | 0.01 |
| Non-alcoholic Fatty C0400966 | MARCHF8 | ##### Q5T0T0 | membrane associated     | 87  | 0.59  | 0.692 | 5.87E-07 | 0.01 |
| Non-alcoholic Fatty C0400966 | FCGR3A  | 2214 P08637  | Fc fragmet Cell adhes   | 352 | 0.432 | 0.962 | 3.7E-06  | 0.01 |
| Non-alcoholic Fatty C0400966 | FCGR3B  | 2215 O75015  | Fc fragmet Cell adhes   | 291 | 0.452 | 0.962 | 3.03E-07 | 0.01 |
| Non-alcoholic Fatty C0400966 | JAZF1   | ##### Q86VZ6 | JAZF zinc finger 1      | 102 | 0.582 | 0.654 | 0.89582  | 0.01 |
| Non-alcoholic Fatty C0400966 | GPC4    | 2239 O75487  | glypican 4              | 181 | 0.547 | 0.769 | 0.92613  | 0.01 |
| Non-alcoholic Fatty C0400966 | FGF1    | 2246 P05230  | fibroblast s Signaling  | 184 | 0.507 | 0.846 | 0.44406  | 0.01 |
| Non-alcoholic Fatty C0400966 | FGR     | 2268 P09769  | FGR proto Kinase        | 56  | 0.647 | 0.615 | 0.48408  | 0.01 |
| Non-alcoholic Fatty C0400966 | MLXIP   | 22877 Q9HAP2 | MLX interacting protc   | 70  | 0.597 | 0.692 | 0.98932  | 0.01 |
| Non-alcoholic Fatty C0400966 | ZHX2    | 22882 Q9Y6X8 | zinc finger Transcripti | 172 | 0.51  | 0.654 | 0.03372  | 0.01 |
| Non-alcoholic Fatty C0400966 | ALDOB   | 229 P05062   | aldolase, fructose-bisq | 80  | 0.623 | 0.538 | 7.88E-07 | 0.01 |
| Non-alcoholic Fatty C0400966 | DKK1    | 22943 O94907 | dickkopf WNT signal     | 372 | 0.439 | 0.885 | 0.17423  | 0.01 |
| Non-alcoholic Fatty C0400966 | PHLPP2  | 23035 Q6ZVD8 | PH domain and leucin    | 45  | 0.641 | 0.346 | 1.21E-06 | 0.01 |
| Non-alcoholic Fatty C0400966 | SARM1   | 23098 Q6SZW1 | sterile alpha and TIR   | 40  | 0.682 | 0.346 | 1.7E-10  | 0.01 |
| Non-alcoholic Fatty C0400966 | AKR1B1  | 231 P15121   | aldo-keto r Enzyme      | 220 | 0.491 | 0.885 | 2.02E-05 | 0.01 |
| Non-alcoholic Fatty C0400966 | MPRIIP  | 23164 Q6WCQ1 | myosin ph Enzyme m      | 113 | 0.556 | 0.885 | 0.98078  | 0.01 |
| Non-alcoholic Fatty C0400966 | MCF2L   | 23263 O15068 | MCF.2 cel Signaling     | 124 | 0.559 | 0.769 | 2.72E-07 | 0.01 |
| Non-alcoholic Fatty C0400966 | CRTC1   | 23373 Q6UUV9 | CREB regn Transcripti   | 115 | 0.565 | 0.692 | 0.531    | 0.01 |
| Non-alcoholic Fatty C0400966 | SIRT4   | 23409 Q9Y6E7 | sirtuin 4 Epigenetic    | 74  | 0.603 | 0.654 | 6.86E-10 | 0.01 |
| Non-alcoholic Fatty C0400966 | ANGPTL2 | 23452 Q9UKU9 | angiopoiet Signaling    | 125 | 0.545 | 0.731 | 0.001471 | 0.01 |
| Non-alcoholic Fatty C0400966 | BRD4    | 23476 O60885 | bromodom Epigenetic     | 335 | 0.446 | 0.885 | 1        | 0.01 |
| Non-alcoholic Fatty C0400966 | SRRM2   | 23524 Q9UQ35 | serine/arginine repetit | 101 | 0.564 | 0.692 | 1        | 0.01 |
| Non-alcoholic Fatty C0400966 | MMD     | 23531 Q15546 | monocyte t Receptor     | 58  | 0.647 | 0.577 | 0.000134 | 0.01 |
| Non-alcoholic Fatty C0400966 | FOSB    | 2354 P53539  | FosB protc Transcripti  | 278 | 0.463 | 0.846 | 0.97553  | 0.01 |
| Non-alcoholic Fatty C0400966 | FOSL2   | 2355 P15408  | FOS like 2 Transcripti  | 83  | 0.595 | 0.692 | 0.98293  | 0.01 |
| Non-alcoholic Fatty C0400966 | DDAH1   | 23576 O94760 | dimethylar Enzyme       | 73  | 0.604 | 0.615 | 0.002797 | 0.01 |

|                              |          |       |        |                         |     |       |       |          |      |
|------------------------------|----------|-------|--------|-------------------------|-----|-------|-------|----------|------|
| Non-alcoholic Fatty C0400966 | DAPK2    | 23604 | Q9UIK4 | death associ Kinase     | 130 | 0.536 | 0.692 | 5.01E-10 | 0.01 |
| Non-alcoholic Fatty C0400966 | MKRN1    | 23608 | Q9UHC7 | makorin rib Enzyme      | 13  | 0.805 | 0.269 | 0.99421  | 0.01 |
| Non-alcoholic Fatty C0400966 | TMEFF2   | 23671 | Q9UIK5 | transmemb Enzyme m      | 63  | 0.619 | 0.5   | 7.39E-05 | 0.01 |
| Non-alcoholic Fatty C0400966 | IL17RA   | 23765 | Q96F46 | interleukin 17 recepto  | 159 | 0.529 | 0.808 | 0.000356 | 0.01 |
| Non-alcoholic Fatty C0400966 | ZBTB38   | ##### | Q8NAP3 | zinc finger Transcripti | 60  | 0.663 | 0.615 | 0.99949  | 0.01 |
| Non-alcoholic Fatty C0400966 | G6PC     | 2538  | P35575 | glucose-6-phosphatas    | 132 | 0.56  | 0.692 | 1.84E-05 | 0.01 |
| Non-alcoholic Fatty C0400966 | PRDX5    | 25824 | P30044 | peroxiredoxin 5         | 153 | 0.522 | 0.808 | 0.000179 | 0.01 |
| Non-alcoholic Fatty C0400966 | GALR1    | 2587  | P47211 | galanin rec G-protein c | 44  | 0.656 | 0.5   | 0.000532 | 0.01 |
| Non-alcoholic Fatty C0400966 | RNF19A   | 25897 | Q9NV58 | ring finger Enzyme      | 523 | 0.397 | 0.923 | 0.025305 | 0.01 |
| Non-alcoholic Fatty C0400966 | WWTR1    | 25937 | Q9GZV5 | WW doma Enzyme m        | 134 | 0.529 | 0.615 | 0.93914  | 0.01 |
| Non-alcoholic Fatty C0400966 | TIPARP   | 25976 | Q7Z3E1 | TCDD inducible poly     | 25  | 0.711 | 0.346 | 0.99991  | 0.01 |
| Non-alcoholic Fatty C0400966 | OSBPL3   | 26031 | Q9H4L5 | oxysterol binding prot  | 10  | 0.839 | 0.192 | 1.59E-06 | 0.01 |
| Non-alcoholic Fatty C0400966 | APPL1    | 26060 | Q9UKG1 | adaptor protein, phosp  | 63  | 0.626 | 0.5   | 0.7952   | 0.01 |
| Non-alcoholic Fatty C0400966 | POLDIP2  | 26073 | Q9Y2S7 | DNA polymerase delt     | 530 | 0.396 | 0.923 | 0.41407  | 0.01 |
| Non-alcoholic Fatty C0400966 | TOR1AIP1 | 26092 | Q5JTV8 | torsin 1A interacting p | 39  | 0.729 | 0.346 | 1.27E-09 | 0.01 |
| Non-alcoholic Fatty C0400966 | PRPF31   | 26121 | Q8WWY3 | pre-mRNA Nucleic ac     | 150 | 0.531 | 0.731 | 0.98313  | 0.01 |
| Non-alcoholic Fatty C0400966 | TRPC4AP  | 26133 | Q8TEL6 | transient receptor pote | 19  | 0.76  | 0.231 | 0.55209  | 0.01 |
| Non-alcoholic Fatty C0400966 | AMD1     | 262   | P17707 | adenosylm Enzyme        | 84  | 0.593 | 0.577 | 0.98227  | 0.01 |
| Non-alcoholic Fatty C0400966 | FGF20    | 26281 | Q9NP95 | fibroblast s Signaling  | 45  | 0.663 | 0.577 | 0.81379  | 0.01 |
| Non-alcoholic Fatty C0400966 | AMD1P2   | 263   |        | adenosylmethionine d    | 71  | 0.608 | 0.538 |          | 0.01 |
| Non-alcoholic Fatty C0400966 | LATS2    | 26524 | Q9NRM7 | large tumo Kinase       | 106 | 0.554 | 0.654 | 0.98807  | 0.01 |
| Non-alcoholic Fatty C0400966 | AATF     | 26574 | Q9NY61 | apoptosis s Transcripti | 44  | 0.641 | 0.731 | 2.6E-12  | 0.01 |
| Non-alcoholic Fatty C0400966 | GNDF     | 2668  | P39905 | glial cell d Signaling  | 409 | 0.434 | 0.885 | 0.2035   | 0.01 |
| Non-alcoholic Fatty C0400966 | NOX1     | 27035 | Q9Y5S8 | NADPH oxidase 1         | 142 | 0.536 | 0.808 | 8.66E-08 | 0.01 |
| Non-alcoholic Fatty C0400966 | SIGLEC7  | 27036 | Q9Y286 | sialic acid Receptor    | 137 | 0.535 | 0.846 | 2.39E-07 | 0.01 |
| Non-alcoholic Fatty C0400966 | INTU     | 27152 | Q9ULD6 | inturned planar cell pc | 134 | 0.555 | 0.769 | 7.7E-10  | 0.01 |
| Non-alcoholic Fatty C0400966 | NAAA     | 27163 | Q02083 | N-acyletha Enzyme       | 90  | 0.579 | 0.692 | 2.07E-10 | 0.01 |
| Non-alcoholic Fatty C0400966 | IL37     | 27178 | Q9NZH6 | interleukin 37          | 280 | 0.459 | 0.846 | 0.000123 | 0.01 |
| Non-alcoholic Fatty C0400966 | GPC3     | 2719  | P51654 | glypican 3              | 311 | 0.466 | 0.808 | 0.9982   | 0.01 |
| Non-alcoholic Fatty C0400966 | GLB1     | 2720  | P16278 | galactosid s Enzyme     | 385 | 0.448 | 0.808 | 7.92E-10 | 0.01 |
| Non-alcoholic Fatty C0400966 | GCLC     | 2729  | P48506 | glutamate- Enzyme       | 198 | 0.509 | 0.885 | 0.42718  | 0.01 |
| Non-alcoholic Fatty C0400966 | RBMS3    | 27303 | Q6XE24 | RNA binding motif si    | 116 | 0.553 | 0.692 | 0.2128   | 0.01 |
| Non-alcoholic Fatty C0400966 | GLI2     | 2736  | P10070 | GLI family zinc finge   | 351 | 0.446 | 0.846 | 0.97303  | 0.01 |
| Non-alcoholic Fatty C0400966 | MAT2B    | 27430 | Q9NZL9 | methionine adenosyltr   | 48  | 0.644 | 0.5   | 0.046226 | 0.01 |
| Non-alcoholic Fatty C0400966 | GLRX     | 2745  | P35754 | glutaredoxin            | 65  | 0.619 | 0.577 | 5.67E-07 | 0.01 |
| Non-alcoholic Fatty C0400966 | GNAI2    | 2768  | Q03113 | G protein s Enzyme m    | 130 | 0.547 | 0.769 | 0.96994  | 0.01 |
| Non-alcoholic Fatty C0400966 | GNAI3    | 2773  | P08754 | G protein s Enzyme m    | 75  | 0.653 | 0.615 | 0.038287 | 0.01 |
| Non-alcoholic Fatty C0400966 | GNAO1    | 2775  | P09471 | G protein s Enzyme m    | 188 | 0.523 | 0.808 | 0.98963  | 0.01 |
| Non-alcoholic Fatty C0400966 | ABO      | 28    | P16442 | ABO, alph Enzyme        | 443 | 0.427 | 0.885 |          | 0.01 |

|                              |          |       |        |                               |      |       |       |          |      |
|------------------------------|----------|-------|--------|-------------------------------|------|-------|-------|----------|------|
| Non-alcoholic Fatty C0400966 | GPI      | 2821  | P06744 | glucose-6- $\gamma$ Enzyme    | 218  | 0.491 | 0.769 | 2.84E-06 | 0.01 |
| Non-alcoholic Fatty C0400966 | ANGPT1   | 284   | Q15389 | angiopoietin Signaling        | 340  | 0.446 | 0.808 | 0.95208  | 0.01 |
| Non-alcoholic Fatty C0400966 | BTBD8    | ##### | Q5XKL5 | BTB domain containi           | 125  | 0.547 | 0.692 | 6.08E-07 | 0.01 |
| Non-alcoholic Fatty C0400966 | ANGPT2   | 285   | O15123 | angiopoietin Signaling        | 457  | 0.41  | 0.846 | 0.83208  | 0.01 |
| Non-alcoholic Fatty C0400966 | GPR31    | 2853  | O00270 | G protein-coupled G-protein c | 7    | 0.839 | 0.115 | 0.020514 | 0.01 |
| Non-alcoholic Fatty C0400966 | FFAR2    | 2867  | O15552 | free fatty acid G-protein c   | 45   | 0.686 | 0.462 | 0.009424 | 0.01 |
| Non-alcoholic Fatty C0400966 | GPS2     | 2874  | Q13227 | G protein $\gamma$ Enzyme m   | 25   | 0.691 | 0.346 | 0.053179 | 0.01 |
| Non-alcoholic Fatty C0400966 | MYLIP    | 29116 | Q8WY64 | myosin regulatory light       | 79   | 0.582 | 0.692 | 0.18431  | 0.01 |
| Non-alcoholic Fatty C0400966 | CTNNA3   | 29119 | Q9UI47 | catenin alpha Cellular st     | 73   | 0.612 | 0.692 | 1.02E-12 | 0.01 |
| Non-alcoholic Fatty C0400966 | GSK3B    | 2932  | P49841 | glycogen synthase Kinase      | 393  | 0.43  | 0.846 | 0.95571  | 0.01 |
| Non-alcoholic Fatty C0400966 | GSTM2    | 2946  | P28161 | glutathione S-transferase     | 195  | 0.488 | 0.808 | 3.39E-07 | 0.01 |
| Non-alcoholic Fatty C0400966 | REPIN1   | 29803 | Q9BWE0 | replication Transcripti       | 13   | 0.792 | 0.231 | 0.09473  | 0.01 |
| Non-alcoholic Fatty C0400966 | CERS2    | 29956 | Q96G23 | ceramide synthase 2           | 40   | 0.691 | 0.5   | 0.47978  | 0.01 |
| Non-alcoholic Fatty C0400966 | DMGDH    | 29958 | Q9UI17 | dimethylglycine Enzyme        | 15   | 0.89  | 0.154 | 2.05E-24 | 0.01 |
| Non-alcoholic Fatty C0400966 | SLC2A8   | 29988 | Q9NY64 | solute carrier Transporte     | 10   | 0.821 | 0.346 | 8.02E-07 | 0.01 |
| Non-alcoholic Fatty C0400966 | SLC40A1  | 30061 | Q9NP59 | solute carrier Transporte     | 101  | 0.57  | 0.731 | 0.98835  | 0.01 |
| Non-alcoholic Fatty C0400966 | H2AX     | 3014  | P16104 | H2A.X variant Nucleic ac      | 212  | 0.484 | 0.808 | 0.17652  | 0.01 |
| Non-alcoholic Fatty C0400966 | HADHB    | 3032  | P55084 | hydroxyacyl-CoA Enzyme        | 101  | 0.619 | 0.692 | 1.52E-11 | 0.01 |
| Non-alcoholic Fatty C0400966 | HADH     | 3033  | Q16836 | hydroxyacyl-CoA dehyd         | 72   | 0.65  | 0.538 | 6.56E-05 | 0.01 |
| Non-alcoholic Fatty C0400966 | HCFC1    | 3054  | P51610 | host cell factor C1           | 100  | 0.601 | 0.692 | 1        | 0.01 |
| Non-alcoholic Fatty C0400966 | HLA-A    | 3105  | P04439 | major histocompatibil         | 672  | 0.37  | 0.846 | 0.00133  | 0.01 |
| Non-alcoholic Fatty C0400966 | HLA-C    | 3107  | P10321 | major histocompatibil         | 435  | 0.415 | 0.846 | 1.57E-06 | 0.01 |
| Non-alcoholic Fatty C0400966 | HLA-DQA1 | 3117  | P01909 | major histocompatibil         | 427  | 0.416 | 0.846 | 0.023947 | 0.01 |
| Non-alcoholic Fatty C0400966 | HLA-DQB1 | 3119  | P01920 | major histocompatibil         | 504  | 0.407 | 0.885 | 0.008926 | 0.01 |
| Non-alcoholic Fatty C0400966 | HLA-DQB2 | 3120  | P05538 | major histocompatibil         | 91   | 0.573 | 0.731 | 0.042679 | 0.01 |
| Non-alcoholic Fatty C0400966 | HLA-DRB1 | 3123  | P01911 | major histocompatibil         | 1018 | 0.333 | 0.923 | 0.0011   | 0.01 |
| Non-alcoholic Fatty C0400966 | AOX1     | 316   | Q06278 | aldehyde oxidase Enzyme       | 26   | 0.716 | 0.308 | 1.17E-31 | 0.01 |
| Non-alcoholic Fatty C0400966 | NR4A1    | 3164  | P22736 | nuclear receptor Nuclear re   | 216  | 0.49  | 0.731 | 0.37074  | 0.01 |
| Non-alcoholic Fatty C0400966 | FOXA2    | 3170  | Q9Y261 | forkhead box b Transcrip      | 143  | 0.528 | 0.769 | 0.74225  | 0.01 |
| Non-alcoholic Fatty C0400966 | BPIFA4P  | ##### | Q86YQ2 | BPI fold containing fa        | 32   | 0.711 | 0.654 |          | 0.01 |
| Non-alcoholic Fatty C0400966 | APOF     | 319   | Q13790 | apolipoprotein F              | 9    | 0.805 | 0.231 | 0.010295 | 0.01 |
| Non-alcoholic Fatty C0400966 | HOXD13   | 3239  | P35453 | homeobox D13                  | 259  | 0.483 | 0.808 | 0.008606 | 0.01 |
| Non-alcoholic Fatty C0400966 | AIRE     | 326   | O43918 | autoimmune regulator          | 175  | 0.516 | 0.808 | 4.05E-12 | 0.01 |
| Non-alcoholic Fatty C0400966 | HRG      | 3273  | P04196 | histidine rich Enzyme m       | 72   | 0.603 | 0.577 | 5.89E-14 | 0.01 |
| Non-alcoholic Fatty C0400966 | PRMT1    | 3276  | Q99873 | protein arginine Epigenetic   | 110  | 0.552 | 0.808 | 0.99907  | 0.01 |
| Non-alcoholic Fatty C0400966 | HSPA4    | 3308  | P34932 | heat shock protein fan        | 550  | 0.394 | 0.923 | 0.99954  | 0.01 |
| Non-alcoholic Fatty C0400966 | HSPA5    | 3309  | P11021 | heat shock protein fan        | 350  | 0.434 | 0.885 | 0.77341  | 0.01 |
| Non-alcoholic Fatty C0400966 | XIAP     | 331   | P98170 | X-linked inhibitor Enzyme m   | 321  | 0.447 | 0.808 | 0.91837  | 0.01 |
| Non-alcoholic Fatty C0400966 | HSPA8    | 3312  | P11142 | heat shock protein fan        | 124  | 0.553 | 0.808 | 0.99863  | 0.01 |

|                              |         |              |                          |     |       |       |          |      |
|------------------------------|---------|--------------|--------------------------|-----|-------|-------|----------|------|
| Non-alcoholic Fatty C0400966 | HSPG2   | 3339 P98160  | heparan su Enzyme m      | 405 | 0.438 | 0.885 | 1.04E-19 | 0.01 |
| Non-alcoholic Fatty C0400966 | APOA1   | 335 P02647   | apolipoprotein A1        | 416 | 0.429 | 0.885 | 0.000549 | 0.01 |
| Non-alcoholic Fatty C0400966 | HTR2A   | 3356 P28223  | 5-hydroxyt G-protein c   | 289 | 0.473 | 0.846 | 0.51124  | 0.01 |
| Non-alcoholic Fatty C0400966 | APOA2   | 336 P02652   | apolipopro Transporte    | 77  | 0.582 | 0.769 | 0.0448   | 0.01 |
| Non-alcoholic Fatty C0400966 | TNC     | 3371 P24821  | tenascin C               | 369 | 0.433 | 0.846 | 1.26E-07 | 0.01 |
| Non-alcoholic Fatty C0400966 | HCAR2   | ##### Q8TDS4 | hydroxycarboxylic aci    | 65  | 0.631 | 0.692 | 0.000189 | 0.01 |
| Non-alcoholic Fatty C0400966 | C1QTNF9 | ##### P0C862 | C1q and TNF related '    | 30  | 0.695 | 0.385 | 1.14E-05 | 0.01 |
| Non-alcoholic Fatty C0400966 | STING1  | ##### Q86WV6 | stimulator of interfero  | 159 | 0.522 | 0.769 | 0.001207 | 0.01 |
| Non-alcoholic Fatty C0400966 | CPP     | #####        | ceruloplasmin pseudo     | 55  | 0.631 | 0.731 |          | 0.01 |
| Non-alcoholic Fatty C0400966 | IFNA1   | 3439 P01562  | interferon alpha 1       | 662 | 0.371 | 0.923 |          | 0.01 |
| Non-alcoholic Fatty C0400966 | IFNA2   | 3440 P01563  | interferon alpha 2       | 355 | 0.442 | 0.885 |          | 0.01 |
| Non-alcoholic Fatty C0400966 | IFNA13  | 3447 P01562  | interferon alpha 13      | 646 | 0.374 | 0.923 |          | 0.01 |
| Non-alcoholic Fatty C0400966 | MOGAT3  | ##### Q86VF5 | monoacylglycerol O-a     | 2   | 0.931 | 0.115 | 1.84E-12 | 0.01 |
| Non-alcoholic Fatty C0400966 | IGF2    | 3481 P01344  | insulin like growth fac  | 604 | 0.39  | 0.885 | 0.044127 | 0.01 |
| Non-alcoholic Fatty C0400966 | IGFBP1  | 3484 P08833  | insulin like Enzyme m    | 191 | 0.502 | 0.808 | 0.000947 | 0.01 |
| Non-alcoholic Fatty C0400966 | IGFBP2  | 3485 P18065  | insulin like Enzyme m    | 241 | 0.478 | 0.769 | 0.11898  | 0.01 |
| Non-alcoholic Fatty C0400966 | IGFBP4  | 3487 P22692  | insulin like Enzyme m    | 94  | 0.572 | 0.731 | 0.023057 | 0.01 |
| Non-alcoholic Fatty C0400966 | IGFBP7  | 3490 Q16270  | insulin like growth fac  | 241 | 0.476 | 0.769 | 0.001287 | 0.01 |
| Non-alcoholic Fatty C0400966 | KLK3    | 354 P07288   | kallikrein 1 Enzyme      | 358 | 0.443 | 0.885 | 4.43E-06 | 0.01 |
| Non-alcoholic Fatty C0400966 | IKBKB   | 3551 O14920  | inhibitor of Kinase      | 191 | 0.506 | 0.846 | 0.99192  | 0.01 |
| Non-alcoholic Fatty C0400966 | IL2     | 3558 P60568  | interleukin 2            | 950 | 0.336 | 0.885 | 0.47968  | 0.01 |
| Non-alcoholic Fatty C0400966 | CXCR2   | 3579 P25025  | C-X-C mo' G-protein c    | 335 | 0.445 | 0.923 | 0.013736 | 0.01 |
| Non-alcoholic Fatty C0400966 | IRF2BP2 | ##### Q7Z5L9 | interferon regulatory f  | 72  | 0.641 | 0.5   | 0.84558  | 0.01 |
| Non-alcoholic Fatty C0400966 | INPP5D  | 3635 Q92835  | inositol polyphosphate   | 109 | 0.558 | 0.731 | 0.97198  | 0.01 |
| Non-alcoholic Fatty C0400966 | INSIG1  | 3638 O15503  | insulin induced gene 1   | 29  | 0.695 | 0.5   | 0.001283 | 0.01 |
| Non-alcoholic Fatty C0400966 | AQP7    | 364 O14520   | aquaporin 1 Ion channe   | 34  | 0.67  | 0.462 | 4.05E-16 | 0.01 |
| Non-alcoholic Fatty C0400966 | IRF3    | 3661 Q14653  | interferon 1 Transcripti | 174 | 0.517 | 0.808 | 0.000116 | 0.01 |
| Non-alcoholic Fatty C0400966 | ITGAM   | 3684 P11215  | integrin subunit alpha   | 343 | 0.443 | 0.808 | 3.31E-11 | 0.01 |
| Non-alcoholic Fatty C0400966 | ITGB1   | 3688 P05556  | integrin su Receptor     | 210 | 0.496 | 0.808 | 0.98208  | 0.01 |
| Non-alcoholic Fatty C0400966 | ITIH4   | 3700 Q14624  | inter-alpha Enzyme m     | 129 | 0.559 | 0.769 | 6.44E-13 | 0.01 |
| Non-alcoholic Fatty C0400966 | ITPR2   | 3709 Q14571  | inositol 1,4 Ion channe  | 55  | 0.631 | 0.654 | 5.71E-29 | 0.01 |
| Non-alcoholic Fatty C0400966 | JAK1    | 3716 P23458  | Janus kina Kinase        | 239 | 0.474 | 0.769 | 0.99998  | 0.01 |
| Non-alcoholic Fatty C0400966 | JUN     | 3725 P05412  | Jun proto-c Transcripti  | 344 | 0.442 | 0.885 | 0.05962  | 0.01 |
| Non-alcoholic Fatty C0400966 | JUNB    | 3726 P17275  | JunB proto Transcripti   | 264 | 0.467 | 0.769 | 0.86299  | 0.01 |
| Non-alcoholic Fatty C0400966 | JUND    | 3727 P17535  | JunD protc Transcripti   | 242 | 0.475 | 0.808 | 0.70054  | 0.01 |
| Non-alcoholic Fatty C0400966 | CD82    | 3732 P27701  | CD82 molecule            | 172 | 0.507 | 0.731 | 1.27E-08 | 0.01 |
| Non-alcoholic Fatty C0400966 | AREG    | 374 P15514   | amphiregu Signaling      | 221 | 0.487 | 0.769 | 0.35407  | 0.01 |
| Non-alcoholic Fatty C0400966 | ACAT1   | 38 P24752    | acetyl-CoA Enzyme        | 176 | 0.538 | 0.692 | 9.85E-08 | 0.01 |
| Non-alcoholic Fatty C0400966 | ARG2    | 384 P78540   | arginase 2 Enzyme        | 103 | 0.569 | 0.731 | 0.000182 | 0.01 |

|                              |           |              |                         |     |       |       |          |      |
|------------------------------|-----------|--------------|-------------------------|-----|-------|-------|----------|------|
| Non-alcoholic Fatty C0400966 | KRT8      | 3856 P05787  | keratin 8               | 166 | 0.517 | 0.654 | 2.36E-08 | 0.01 |
| Non-alcoholic Fatty C0400966 | RTL1      | ##### A6NKG5 | retrotransposon Gag li  | 119 | 0.554 | 0.808 | 0.005614 | 0.01 |
| Non-alcoholic Fatty C0400966 | C1QL3     | ##### Q5VWW1 | complement C1q like     | 27  | 0.705 | 0.423 | 0.51567  | 0.01 |
| Non-alcoholic Fatty C0400966 | LCAT      | 3931 P04180  | lecithin-ch Enzyme      | 94  | 0.588 | 0.654 | 0.08102  | 0.01 |
| Non-alcoholic Fatty C0400966 | LCPI      | 3936 P13796  | lymphocyte Cellular st  | 44  | 0.663 | 0.654 | 0.55261  | 0.01 |
| Non-alcoholic Fatty C0400966 | LGALS3    | 3958 P17931  | galectin 3 Signaling    | 557 | 0.392 | 0.846 | 2.32E-05 | 0.01 |
| Non-alcoholic Fatty C0400966 | LIPE      | 3991 Q05469  | lipase E, hormone sen   | 85  | 0.599 | 0.5   | 9.75E-12 | 0.01 |
| Non-alcoholic Fatty C0400966 | FADS1     | 3992 O60427  | fatty acid desaturase 1 | 125 | 0.582 | 0.769 | 0.37384  | 0.01 |
| Non-alcoholic Fatty C0400966 | LNPEP     | 4012 Q9UIQ6  | leucyl and Enzyme       | 174 | 0.514 | 0.731 | 0.99957  | 0.01 |
| Non-alcoholic Fatty C0400966 | LOXL2     | 4017 Q9Y4K0  | lysyl oxidase like 2    | 149 | 0.527 | 0.731 | 3.38E-07 | 0.01 |
| Non-alcoholic Fatty C0400966 | LRP6      | 4040 O75581  | LDL receptor related j  | 134 | 0.536 | 0.808 | 0.69664  | 0.01 |
| Non-alcoholic Fatty C0400966 | LINC01194 | #####        | long intergenic non-pi  | 249 | 0.47  | 0.769 |          | 0.01 |
| Non-alcoholic Fatty C0400966 | ARNT      | 405 P27540   | aryl hydroc Transcripti | 104 | 0.575 | 0.692 | 0.99581  | 0.01 |
| Non-alcoholic Fatty C0400966 | LTF       | 4057 P02788  | lactotransf Enzyme      | 133 | 0.543 | 0.846 | 1.27E-21 | 0.01 |
| Non-alcoholic Fatty C0400966 | LUM       | 4060 P51884  | lumican                 | 123 | 0.543 | 0.731 | 0.07696  | 0.01 |
| Non-alcoholic Fatty C0400966 | MIR130A   | #####        | microRNA 130a           | 141 | 0.522 | 0.808 |          | 0.01 |
| Non-alcoholic Fatty C0400966 | MIR132    | #####        | microRNA 132            | 222 | 0.485 | 0.846 |          | 0.01 |
| Non-alcoholic Fatty C0400966 | MIR136    | #####        | microRNA 136            | 79  | 0.584 | 0.731 |          | 0.01 |
| Non-alcoholic Fatty C0400966 | MIR141    | #####        | microRNA 141            | 179 | 0.497 | 0.808 |          | 0.01 |
| Non-alcoholic Fatty C0400966 | MIR142    | #####        | microRNA 142            | 220 | 0.48  | 0.846 |          | 0.01 |
| Non-alcoholic Fatty C0400966 | MIR143    | #####        | microRNA 143            | 267 | 0.462 | 0.885 |          | 0.01 |
| Non-alcoholic Fatty C0400966 | MIR144    | #####        | microRNA 144            | 175 | 0.5   | 0.769 |          | 0.01 |
| Non-alcoholic Fatty C0400966 | MIR146A   | #####        | microRNA 146a           | 505 | 0.398 | 0.885 |          | 0.01 |
| Non-alcoholic Fatty C0400966 | MIR150    | #####        | microRNA 150            | 282 | 0.455 | 0.808 |          | 0.01 |
| Non-alcoholic Fatty C0400966 | MIR15B    | #####        | microRNA 15b            | 134 | 0.532 | 0.769 |          | 0.01 |
| Non-alcoholic Fatty C0400966 | MIR17     | #####        | microRNA 17             | 270 | 0.459 | 0.846 |          | 0.01 |
| Non-alcoholic Fatty C0400966 | MIR185    | #####        | microRNA 185            | 106 | 0.551 | 0.808 |          | 0.01 |
| Non-alcoholic Fatty C0400966 | MIR200B   | #####        | microRNA 200b           | 180 | 0.5   | 0.769 |          | 0.01 |
| Non-alcoholic Fatty C0400966 | MIR205    | #####        | microRNA 205            | 210 | 0.482 | 0.846 |          | 0.01 |
| Non-alcoholic Fatty C0400966 | MIR206    | #####        | microRNA 206            | 226 | 0.477 | 0.846 |          | 0.01 |
| Non-alcoholic Fatty C0400966 | MIR212    | #####        | microRNA 212            | 126 | 0.535 | 0.808 |          | 0.01 |
| Non-alcoholic Fatty C0400966 | MIR223    | #####        | microRNA 223            | 348 | 0.433 | 0.808 |          | 0.01 |
| Non-alcoholic Fatty C0400966 | MIR23B    | #####        | microRNA 23b            | 137 | 0.523 | 0.808 |          | 0.01 |
| Non-alcoholic Fatty C0400966 | MIR24-1   | #####        | microRNA 24-1           | 74  | 0.584 | 0.731 |          | 0.01 |
| Non-alcoholic Fatty C0400966 | MIR27A    | #####        | microRNA 27a            | 248 | 0.466 | 0.846 |          | 0.01 |
| Non-alcoholic Fatty C0400966 | MIR27B    | #####        | microRNA 27b            | 141 | 0.529 | 0.769 |          | 0.01 |
| Non-alcoholic Fatty C0400966 | MIR29B1   | #####        | microRNA 29b-1          | 212 | 0.485 | 0.846 |          | 0.01 |
| Non-alcoholic Fatty C0400966 | MIR29B2   | #####        | microRNA 29b-2          | 214 | 0.484 | 0.885 |          | 0.01 |
| Non-alcoholic Fatty C0400966 | MIR29C    | #####        | microRNA 29c            | 183 | 0.496 | 0.808 |          | 0.01 |

|                              |         |              |                         |      |       |                |      |
|------------------------------|---------|--------------|-------------------------|------|-------|----------------|------|
| Non-alcoholic Fatty C0400966 | MIR30B  | #####        | microRNA 30b            | 109  | 0.555 | 0.808          | 0.01 |
| Non-alcoholic Fatty C0400966 | MIR30C1 | #####        | microRNA 30c-1          | 109  | 0.552 | 0.769          | 0.01 |
| Non-alcoholic Fatty C0400966 | MIR30C2 | #####        | microRNA 30c-2          | 115  | 0.546 | 0.769          | 0.01 |
| Non-alcoholic Fatty C0400966 | ARRB1   | 408 P49407   | arrestin bel Enzyme m   | 92   | 0.588 | 0.846 0.99394  | 0.01 |
| Non-alcoholic Fatty C0400966 | SMAD7   | 4092 O15105  | SMAD far Transcripti    | 269  | 0.47  | 0.769 0.54854  | 0.01 |
| Non-alcoholic Fatty C0400966 | MAT1A   | 4143 Q00266  | methionine Enzyme       | 103  | 0.582 | 0.577 0.00081  | 0.01 |
| Non-alcoholic Fatty C0400966 | DNAJB9  | 4189 Q9UBS3  | DnaJ heat shock prote   | 27   | 0.7   | 0.385 0.36507  | 0.01 |
| Non-alcoholic Fatty C0400966 | MEFV    | 4210 O15553  | MEFV innate immunity    | 410  | 0.44  | 0.885 1.02E-14 | 0.01 |
| Non-alcoholic Fatty C0400966 | MET     | 4233 P08581  | MET protc Kinase        | 594  | 0.38  | 0.846 0.96998  | 0.01 |
| Non-alcoholic Fatty C0400966 | MIF     | 4282 P14174  | macrophage migrator     | 455  | 0.412 | 0.885 0.012262 | 0.01 |
| Non-alcoholic Fatty C0400966 | CXCL9   | 4283 Q07325  | C-X-C mo Signaling      | 269  | 0.462 | 0.808 0.00293  | 0.01 |
| Non-alcoholic Fatty C0400966 | MMP9    | 4318 P14780  | matrix met Enzyme       | 1337 | 0.305 | 0.923 1.89E-17 | 0.01 |
| Non-alcoholic Fatty C0400966 | MPI     | 4351 P34949  | mannose p Enzyme        | 101  | 0.585 | 0.654 1.17E-07 | 0.01 |
| Non-alcoholic Fatty C0400966 | MPO     | 4353 P05164  | myelopero Enzyme        | 653  | 0.377 | 0.923 7.11E-15 | 0.01 |
| Non-alcoholic Fatty C0400966 | MPST    | 4357 P25325  | mercaptopy Enzyme       | 81   | 0.588 | 0.654 3.47E-05 | 0.01 |
| Non-alcoholic Fatty C0400966 | MRC1    | 4360 P22897  | mannose receptor C-ty   | 431  | 0.413 | 0.846 0.94335  | 0.01 |
| Non-alcoholic Fatty C0400966 | ASNS    | 440 P08243   | asparagine Enzyme       | 90   | 0.595 | 0.692 9.36E-06 | 0.01 |
| Non-alcoholic Fatty C0400966 | EIF2AK4 | ##### Q9P2K8 | eukaryotic translation  | 89   | 0.603 | 0.577 1.24E-15 | 0.01 |
| Non-alcoholic Fatty C0400966 | MIR330  | #####        | microRNA 330            | 81   | 0.584 | 0.692          | 0.01 |
| Non-alcoholic Fatty C0400966 | MIR331  | #####        | microRNA 331            | 63   | 0.612 | 0.615          | 0.01 |
| Non-alcoholic Fatty C0400966 | MIR367  | #####        | microRNA 367            | 71   | 0.59  | 0.654          | 0.01 |
| Non-alcoholic Fatty C0400966 | MST1    | 4485 P26927  | macrophag Enzyme        | 281  | 0.465 | 0.885 4.78E-19 | 0.01 |
| Non-alcoholic Fatty C0400966 | ND6     | 4541 P03923  | NADH dehydrogenase      | 224  | 0.544 | 0.808          | 0.01 |
| Non-alcoholic Fatty C0400966 | MYC     | 4609 P01106  | MYC protc Transcripti   | 821  | 0.344 | 0.923 0.99801  | 0.01 |
| Non-alcoholic Fatty C0400966 | MYD88   | 4615 Q99836  | MYD88 in Enzyme m       | 480  | 0.414 | 0.923 0.12443  | 0.01 |
| Non-alcoholic Fatty C0400966 | HNRNPM  | 4670 P52272  | heterogene Nucleic ac   | 26   | 0.729 | 0.346 0.99999  | 0.01 |
| Non-alcoholic Fatty C0400966 | ATF4    | 468 P18848   | activating transcriptio | 178  | 0.507 | 0.769 0.015659 | 0.01 |
| Non-alcoholic Fatty C0400966 | NBN     | 4683 O60934  | nibrin Nucleic ac       | 291  | 0.467 | 0.808 2.18E-16 | 0.01 |
| Non-alcoholic Fatty C0400966 | NEU1    | 4758 Q99519  | neuraminic Enzyme       | 207  | 0.513 | 0.769 7.34E-05 | 0.01 |
| Non-alcoholic Fatty C0400966 | NHS     | 4810 Q6T4R5  | NHS actin remodeling    | 295  | 0.466 | 0.846 0.99999  | 0.01 |
| Non-alcoholic Fatty C0400966 | NNMT    | 4837 P40261  | nicotinami Enzyme       | 103  | 0.559 | 0.654 5.28E-08 | 0.01 |
| Non-alcoholic Fatty C0400966 | NOS2    | 4843 P35228  | nitric oxide synthase 2 | 783  | 0.364 | 0.923 4.03E-15 | 0.01 |
| Non-alcoholic Fatty C0400966 | NOS3    | 4846 P29474  | nitric oxide synthase 3 | 706  | 0.378 | 0.885 6.72E-07 | 0.01 |
| Non-alcoholic Fatty C0400966 | NOTCH1  | 4851 P46531  | notch receptor 1        | 693  | 0.369 | 0.885 1        | 0.01 |
| Non-alcoholic Fatty C0400966 | NRF1    | 4899 Q16656  | nuclear respiratory fac | 74   | 0.603 | 0.808 0.99922  | 0.01 |
| Non-alcoholic Fatty C0400966 | NUCB2   | 4925 P80303  | nucleobind Calcium-b    | 140  | 0.54  | 0.731 2E-10    | 0.01 |
| Non-alcoholic Fatty C0400966 | CISD2   | ##### Q8N5K1 | CDGSH iron sulfur dc    | 106  | 0.59  | 0.692 0.41583  | 0.01 |
| Non-alcoholic Fatty C0400966 | MIR361  | #####        | microRNA 361            | 79   | 0.578 | 0.654          | 0.01 |
| Non-alcoholic Fatty C0400966 | MIR423  | #####        | microRNA 423            | 91   | 0.566 | 0.769          | 0.01 |



|                              |          |              |                                                |     |       |       |          |      |
|------------------------------|----------|--------------|------------------------------------------------|-----|-------|-------|----------|------|
| Non-alcoholic Fatty C0400966 | P2RX5    | 5026 Q93086  | purinergic Ion channel                         | 132 | 0.548 | 0.769 | 2.85E-13 | 0.01 |
| Non-alcoholic Fatty C0400966 | P4HA1    | 5033 P13674  | prolyl 4-hydroxylase                           | 27  | 0.736 | 0.385 | 0.93166  | 0.01 |
| Non-alcoholic Fatty C0400966 | DUOX2    | 50506 Q9NRD8 | dual oxidase Enzyme                            | 150 | 0.533 | 0.769 | 4.5E-56  | 0.01 |
| Non-alcoholic Fatty C0400966 | NOX4     | 50507 Q9NPH5 | NADPH oxidase Enzyme                           | 260 | 0.471 | 0.885 | 5.76E-20 | 0.01 |
| Non-alcoholic Fatty C0400966 | IL20     | 50604 Q9NYY1 | interleukin 20                                 | 111 | 0.556 | 0.769 | 1.34E-06 | 0.01 |
| Non-alcoholic Fatty C0400966 | PAPPA    | 5069 Q13219  | pappalysin 1                                   | 125 | 0.558 | 0.692 | 0.1613   | 0.01 |
| Non-alcoholic Fatty C0400966 | PC       | 5091 P11498  | pyruvate carboxylase Enzyme                    | 183 | 0.515 | 0.808 | 0.013834 | 0.01 |
| Non-alcoholic Fatty C0400966 | SOST     | 50964 Q9BQB4 | sclerostin                                     | 270 | 0.474 | 0.808 | 0.86731  | 0.01 |
| Non-alcoholic Fatty C0400966 | PCK1     | 5105 P35558  | phosphoenolpyruvate Kinase                     | 73  | 0.608 | 0.538 | 8.75E-15 | 0.01 |
| Non-alcoholic Fatty C0400966 | ABHD5    | 51099 Q8WTS1 | abhydrolase domain containing                  | 76  | 0.641 | 0.538 | 6.42E-07 | 0.01 |
| Non-alcoholic Fatty C0400966 | INSIG2   | 51141 Q9Y5U4 | insulin induced gene 2                         | 45  | 0.653 | 0.5   | 0.059986 | 0.01 |
| Non-alcoholic Fatty C0400966 | MBTPS2   | 51360 O43462 | membrane type 2 protease                       | 205 | 0.513 | 0.769 | 0.99752  | 0.01 |
| Non-alcoholic Fatty C0400966 | ISYNA1   | 51477 Q9NPH2 | inositol-3-phosphatase                         | 168 | 0.51  | 0.769 | 2.49E-05 | 0.01 |
| Non-alcoholic Fatty C0400966 | SIRT6    | 51548 Q8N6T7 | sirtuin 6 Epigenetic                           | 195 | 0.496 | 0.846 | 0.039119 | 0.01 |
| Non-alcoholic Fatty C0400966 | PDGFRB   | 5159 P09619  | platelet derived growth factor receptor kinase | 492 | 0.416 | 0.846 | 0.9041   | 0.01 |
| Non-alcoholic Fatty C0400966 | ARID4B   | 51742 Q4LE39 | AT-rich interaction domain                     | 62  | 0.631 | 0.615 | 1        | 0.01 |
| Non-alcoholic Fatty C0400966 | SERPINA4 | 5267 P29622  | serpin family A member 4                       | 45  | 0.641 | 0.654 | 9.73E-09 | 0.01 |
| Non-alcoholic Fatty C0400966 | SERPINB6 | 5269 P35237  | serpin family B member 6                       | 128 | 0.547 | 0.769 | 0.00011  | 0.01 |
| Non-alcoholic Fatty C0400966 | PIGR     | 5284 P01833  | polymeric immunoglobulin receptor              | 71  | 0.615 | 0.808 | 0.81331  | 0.01 |
| Non-alcoholic Fatty C0400966 | PITX3    | 5309 O75364  | paired like homeodomain                        | 93  | 0.585 | 0.692 | 0.81276  | 0.01 |
| Non-alcoholic Fatty C0400966 | PKM      | 5315 P14618  | pyruvate kinase                                | 237 | 0.482 | 0.808 | 0.8549   | 0.01 |
| Non-alcoholic Fatty C0400966 | PKNOX1   | 5316 P55347  | PBX/knottin domain                             | 34  | 0.674 | 0.538 | 0.99401  | 0.01 |
| Non-alcoholic Fatty C0400966 | PLCG1    | 5335 P19174  | phospholipase C                                | 116 | 0.564 | 0.692 | 7.93E-05 | 0.01 |
| Non-alcoholic Fatty C0400966 | PLG      | 5340 P00747  | plasminogen activator                          | 586 | 0.389 | 0.923 | 0.010345 | 0.01 |
| Non-alcoholic Fatty C0400966 | PLTP     | 5360 P55058  | phospholipid transfer protein                  | 62  | 0.633 | 0.654 | 9E-09    | 0.01 |
| Non-alcoholic Fatty C0400966 | PMCH     | 5367 P20382  | pro-melanin concentrating hormone              | 57  | 0.615 | 0.808 | 0.11486  | 0.01 |
| Non-alcoholic Fatty C0400966 | DUOX1    | 53905 Q9NRD9 | dual oxidase Enzyme                            | 97  | 0.57  | 0.692 | 6.22E-33 | 0.01 |
| Non-alcoholic Fatty C0400966 | TREM1    | 54210 Q9NP99 | triggering receptor expressed on myeloid cells | 172 | 0.515 | 0.808 | 0.006278 | 0.01 |
| Non-alcoholic Fatty C0400966 | CCHCR1   | 54535 Q8TD31 | coiled-coil alpha-helical                      | 193 | 0.505 | 0.808 | 1.01E-16 | 0.01 |
| Non-alcoholic Fatty C0400966 | UGT1A10  | 54575 Q9HAW8 | UDP glucuronosyltransferase                    | 88  | 0.588 | 0.615 | 4.59E-19 | 0.01 |
| Non-alcoholic Fatty C0400966 | UGT1A8   | 54576 Q9HAW9 | UDP glucuronosyltransferase                    | 90  | 0.588 | 0.654 | 1.31E-09 | 0.01 |
| Non-alcoholic Fatty C0400966 | UGT1A7   | 54577 Q9HAW7 | UDP glucuronosyltransferase                    | 125 | 0.55  | 0.692 | 8.66E-14 | 0.01 |
| Non-alcoholic Fatty C0400966 | UGT1A6   | 54578 P19224 | UDP glucuronosyltransferase                    | 115 | 0.56  | 0.654 | 3.05E-07 | 0.01 |
| Non-alcoholic Fatty C0400966 | EGLN1    | 54583 Q9GZT9 | egl-9 family hypoxia inducible                 | 130 | 0.54  | 0.731 | 0.97403  | 0.01 |
| Non-alcoholic Fatty C0400966 | UGT1A4   | 54657 P22310 | UDP glucuronosyltransferase                    | 84  | 0.595 | 0.654 | 5.98E-07 | 0.01 |
| Non-alcoholic Fatty C0400966 | CROT     | 54677 Q9UKG9 | carnitine C transferase                        | 11  | 0.805 | 0.346 | 4.43E-25 | 0.01 |
| Non-alcoholic Fatty C0400966 | TET2     | 54790 Q6N021 | tet methylcytosine dioxygenase                 | 362 | 0.458 | 0.808 | 4.33E-54 | 0.01 |
| Non-alcoholic Fatty C0400966 | SLC52A1  | 55065 Q9NWF4 | solute carrier family 52 member 1              | 160 | 0.526 | 0.769 | 3.52E-06 | 0.01 |
| Non-alcoholic Fatty C0400966 | PPP1R3C  | 5507 Q9UQK1  | protein phosphatase 1 regulatory subunit       | 25  | 0.711 | 0.5   | 0.00264  | 0.01 |

|                              |         |              |                         |     |       |       |          |      |
|------------------------------|---------|--------------|-------------------------|-----|-------|-------|----------|------|
| Non-alcoholic Fatty C0400966 | PIWIL2  | 55124 Q8TC59 | piwi like RNA-medi      | 65  | 0.612 | 0.577 | 2.71E-08 | 0.01 |
| Non-alcoholic Fatty C0400966 | NUDT11  | 55190 Q96G61 | nudix hydr Enzyme       | 37  | 0.647 | 0.615 | 0.10316  | 0.01 |
| Non-alcoholic Fatty C0400966 | APPL2   | 55198 Q8NEU8 | adaptor protein, phosp  | 36  | 0.7   | 0.423 | 1.16E-18 | 0.01 |
| Non-alcoholic Fatty C0400966 | SLC47A1 | 55244 Q96FL8 | solute carri Transporte | 28  | 0.729 | 0.462 | 1.96E-14 | 0.01 |
| Non-alcoholic Fatty C0400966 | CWF19L1 | 55280 Q69YN2 | CWF19 like cell cycle   | 51  | 0.691 | 0.346 | 1.44E-15 | 0.01 |
| Non-alcoholic Fatty C0400966 | FBXW7   | 55294 Q969H0 | F-box and Enzyme m      | 257 | 0.465 | 0.808 | 0.99949  | 0.01 |
| Non-alcoholic Fatty C0400966 | CHDH    | 55349 Q8NE62 | choline del Enzyme      | 158 | 0.529 | 0.769 | 1.69E-06 | 0.01 |
| Non-alcoholic Fatty C0400966 | NLRP2   | 55655 Q9NX02 | NLR family pyrin don    | 155 | 0.515 | 0.731 | 1.42E-38 | 0.01 |
| Non-alcoholic Fatty C0400966 | TRERF1  | 55809 Q96PN7 | transcriptional regulat | 22  | 0.729 | 0.346 | 1        | 0.01 |
| Non-alcoholic Fatty C0400966 | ALLC    | 55821 Q8N6M5 | allantoicase            | 28  | 0.695 | 0.385 | 4.23E-16 | 0.01 |
| Non-alcoholic Fatty C0400966 | PAG1    | 55824 Q9NWQ8 | phosphoprotein memb     | 174 | 0.505 | 0.808 | 0.017764 | 0.01 |
| Non-alcoholic Fatty C0400966 | ACOT13  | 55856 Q9NPJ3 | acyl-CoA thioesterase   | 17  | 0.729 | 0.423 | 3.13E-06 | 0.01 |
| Non-alcoholic Fatty C0400966 | PRKDC   | 5591 P78527  | protein kin Kinase      | 131 | 0.54  | 0.808 | 1        | 0.01 |
| Non-alcoholic Fatty C0400966 | ERBIN   | 55914 Q96RT1 | erbb2 interacting prot  | 31  | 0.7   | 0.231 | 0.99402  | 0.01 |
| Non-alcoholic Fatty C0400966 | MAPK3   | 5595 P27361  | mitogen-ac Kinase       | 647 | 0.379 | 0.885 | 0.036884 | 0.01 |
| Non-alcoholic Fatty C0400966 | MAP2K7  | 5609 O14733  | mitogen-ac Kinase       | 408 | 0.419 | 0.808 | 0.99552  | 0.01 |
| Non-alcoholic Fatty C0400966 | PRLR    | 5618 P16471  | prolactin r Signaling   | 110 | 0.572 | 0.692 | 0.98732  | 0.01 |
| Non-alcoholic Fatty C0400966 | LGALS14 | 56891 Q8TCE9 | galectin 14 Signaling   | 35  | 0.695 | 0.423 | 0.000275 | 0.01 |
| Non-alcoholic Fatty C0400966 | UBQLN4  | 56893 Q9NRR5 | ubiquilin 4             | 11  | 0.805 | 0.308 | 0.98252  | 0.01 |
| Non-alcoholic Fatty C0400966 | PNO1    | 56902 Q9NRX1 | partner of NOB1 hom     | 99  | 0.564 | 0.615 | 0.22652  | 0.01 |
| Non-alcoholic Fatty C0400966 | ADAMTS9 | 56999 Q9P2N4 | ADAM m Enzyme           | 53  | 0.633 | 0.692 | 1E-06    | 0.01 |
| Non-alcoholic Fatty C0400966 | BAAT    | 570 Q14032   | bile acid-CoA:amino     | 98  | 0.578 | 0.654 | 7.87E-08 | 0.01 |
| Non-alcoholic Fatty C0400966 | PCBP4   | 57060 P57723 | poly(rC) bi Enzyme      | 147 | 0.523 | 0.808 | 0.002371 | 0.01 |
| Non-alcoholic Fatty C0400966 | SMURF1  | 57154 Q9HCE7 | SMAD sp Enzyme          | 70  | 0.595 | 0.615 | 0.6118   | 0.01 |
| Non-alcoholic Fatty C0400966 | PTBP1   | 5725 P26599  | polypyrimidine tract b  | 172 | 0.517 | 0.769 | 0.99961  | 0.01 |
| Non-alcoholic Fatty C0400966 | PTGFRN  | 5738 Q9P2B2  | prostaglandin F2 rece   | 14  | 0.76  | 0.269 | 0.000476 | 0.01 |
| Non-alcoholic Fatty C0400966 | MIR20B  | #####        | microRNA 20b            | 84  | 0.581 | 0.615 |          | 0.01 |
| Non-alcoholic Fatty C0400966 | MIR193B | #####        | microRNA 193b           | 117 | 0.536 | 0.808 |          | 0.01 |
| Non-alcoholic Fatty C0400966 | LRRC7   | 57554 Q96NW7 | leucine rich repeat coi | 26  | 0.722 | 0.462 | 1        | 0.01 |
| Non-alcoholic Fatty C0400966 | SEMA6A  | 57556 Q9H2E6 | semaphorin Signaling    | 211 | 0.486 | 0.808 | 0.99976  | 0.01 |
| Non-alcoholic Fatty C0400966 | ARRDC3  | 57561 Q96B67 | arrestin domain contai  | 24  | 0.711 | 0.308 | 0.98715  | 0.01 |
| Non-alcoholic Fatty C0400966 | PTPN6   | 5777 P29350  | protein tyrosine phosp  | 218 | 0.485 | 0.769 | 0.99999  | 0.01 |
| Non-alcoholic Fatty C0400966 | PTPRC   | 5788 P08575  | protein tyr Enzyme      | 366 | 0.435 | 0.808 | 1        | 0.01 |
| Non-alcoholic Fatty C0400966 | PTX3    | 5806 P26022  | pentraxin 3             | 296 | 0.457 | 0.808 | 6.98E-05 | 0.01 |
| Non-alcoholic Fatty C0400966 | BAX     | 581 Q07812   | BCL2 assc Signaling     | 420 | 0.417 | 0.885 | 0.31746  | 0.01 |
| Non-alcoholic Fatty C0400966 | PGAP6   | 58986 Q9HCN3 | post-glyco Cell adhes   | 3   | 1     | 0.038 | 4.37E-10 | 0.01 |
| Non-alcoholic Fatty C0400966 | BCHE    | 590 P06276   | butyrylcholinesterase   | 392 | 0.447 | 0.923 | 1.06E-13 | 0.01 |
| Non-alcoholic Fatty C0400966 | RARA    | 5914 P10276  | retinoic aci Nuclear re | 274 | 0.47  | 0.846 | 0.96305  | 0.01 |
| Non-alcoholic Fatty C0400966 | TRPV4   | 59341 Q9HBA0 | transient re Ion channe | 422 | 0.457 | 0.808 | 2.24E-16 | 0.01 |

|                              |         |              |                                   |      |       |       |          |      |
|------------------------------|---------|--------------|-----------------------------------|------|-------|-------|----------|------|
| Non-alcoholic Fatty C0400966 | OPN1LW  | 5956 P04000  | opsin 1, long G-protein coupled   | 197  | 0.497 | 0.808 | 0.97535  | 0.01 |
| Non-alcoholic Fatty C0400966 | RELA    | 5970 Q04206  | RELA protein Transcription factor | 483  | 0.406 | 0.885 | 0.99948  | 0.01 |
| Non-alcoholic Fatty C0400966 | ACTB    | 60 P60709    | actin beta Cellular structure     | 1110 | 0.325 | 0.923 | 0.98564  | 0.01 |
| Non-alcoholic Fatty C0400966 | RLN2    | 6019 P04090  | relaxin 2 Signaling               | 54   | 0.626 | 0.615 | 0.0009   | 0.01 |
| Non-alcoholic Fatty C0400966 | BRD2    | 6046 P25440  | bromodomain Epigenetic            | 303  | 0.45  | 0.808 | 0.99957  | 0.01 |
| Non-alcoholic Fatty C0400966 | RPS6KB1 | 6198 P23443  | ribosomal protein S6 Kinase       | 169  | 0.511 | 0.731 | 0.97285  | 0.01 |
| Non-alcoholic Fatty C0400966 | SORT1   | 6272 Q99523  | sortilin 1 Transporter            | 111  | 0.573 | 0.615 | 0.99987  | 0.01 |
| Non-alcoholic Fatty C0400966 | S100A4  | 6275 P26447  | S100 calcium-binding protein      | 308  | 0.448 | 0.769 | 0.006184 | 0.01 |
| Non-alcoholic Fatty C0400966 | CCL5    | 6352 P13501  | C-C motif Signaling               | 514  | 0.403 | 0.885 | 0.001752 | 0.01 |
| Non-alcoholic Fatty C0400966 | CCL17   | 6361 Q92583  | C-C motif Signaling               | 162  | 0.518 | 0.808 | 0.000139 | 0.01 |
| Non-alcoholic Fatty C0400966 | CCL19   | 6363 Q99731  | C-C motif Signaling               | 126  | 0.542 | 0.692 | 0.31691  | 0.01 |
| Non-alcoholic Fatty C0400966 | CXCL5   | 6374 P42830  | C-X-C motif Signaling             | 160  | 0.519 | 0.769 | 5.04E-06 | 0.01 |
| Non-alcoholic Fatty C0400966 | CIDEA   | 63924 Q96AQ7 | cell death inducing Drosophila    | 43   | 0.666 | 0.462 | 0.008966 | 0.01 |
| Non-alcoholic Fatty C0400966 | SELL    | 6402 P14151  | selectin L                        | 171  | 0.505 | 0.846 | 4.96E-07 | 0.01 |
| Non-alcoholic Fatty C0400966 | SELP    | 6403 P16109  | selectin P                        | 293  | 0.46  | 0.769 | 5.04E-32 | 0.01 |
| Non-alcoholic Fatty C0400966 | SMOC2   | 64094 Q9H3U7 | SPARC related Calcium-binding     | 42   | 0.67  | 0.462 | 0.002528 | 0.01 |
| Non-alcoholic Fatty C0400966 | TMBIM1  | 64114 Q969X1 | transmembrane BAX inhibitor       | 30   | 0.711 | 0.154 | 1.36E-08 | 0.01 |
| Non-alcoholic Fatty C0400966 | SETMAR  | 6419 Q53H47  | SET domain Epigenetic             | 61   | 0.617 | 0.692 | 0.000102 | 0.01 |
| Non-alcoholic Fatty C0400966 | SFRP4   | 6424 Q6FHJ7  | secreted frizzled related         | 155  | 0.524 | 0.654 | 9.26E-05 | 0.01 |
| Non-alcoholic Fatty C0400966 | ABCG8   | 64241 Q9H221 | ATP binding Transporter           | 116  | 0.573 | 0.538 | 2.38E-20 | 0.01 |
| Non-alcoholic Fatty C0400966 | SFRP5   | 6425 Q5T4F7  | secreted frizzled related         | 106  | 0.559 | 0.692 | 5.18E-06 | 0.01 |
| Non-alcoholic Fatty C0400966 | SRSF3   | 6428 P84103  | serine and Nucleic acid           | 60   | 0.619 | 0.615 | 0.96323  | 0.01 |
| Non-alcoholic Fatty C0400966 | NSD1    | 64324 Q96L73 | nuclear receptor Epigenetic       | 247  | 0.505 | 0.769 | 1        | 0.01 |
| Non-alcoholic Fatty C0400966 | XPO4    | 64328 Q9C0E2 | exportin 4 Transporter            | 17   | 0.751 | 0.192 | 1        | 0.01 |
| Non-alcoholic Fatty C0400966 | BLVRA   | 644 P53004   | biliverdin reductase Enzyme       | 34   | 0.663 | 0.423 | 0.000348 | 0.01 |
| Non-alcoholic Fatty C0400966 | GORASP1 | 64689 Q9BQQ3 | golgi reassembly staphylococcal   | 369  | 0.428 | 0.846 | 0.019543 | 0.01 |
| Non-alcoholic Fatty C0400966 | ARV1    | 64801 Q9H2C2 | ARV1 homolog, fatty acid          | 57   | 0.691 | 0.423 | 3.59E-06 | 0.01 |
| Non-alcoholic Fatty C0400966 | ST3GAL4 | 6484 Q11206  | ST3 beta-galactoside 4-epimerase  | 115  | 0.588 | 0.692 | 0.039802 | 0.01 |
| Non-alcoholic Fatty C0400966 | WNK1    | 65125 Q9H4A3 | WNK lysine Kinase                 | 460  | 0.416 | 0.846 | 1        | 0.01 |
| Non-alcoholic Fatty C0400966 | SLC2A4  | 6517 P14672  | solute carrier Transporter        | 158  | 0.528 | 0.769 | 4.71E-05 | 0.01 |
| Non-alcoholic Fatty C0400966 | BMP4    | 652 P12644   | bone morphogenetic Signaling      | 423  | 0.422 | 0.808 | 0.9564   | 0.01 |
| Non-alcoholic Fatty C0400966 | SLC3A2  | 6520 P08195  | solute carrier Transporter        | 108  | 0.565 | 0.731 | 4.22E-08 | 0.01 |
| Non-alcoholic Fatty C0400966 | FRTS1   | 65211        | Fanconi renal tubular syndrome    | 69   | 0.599 | 0.654 |          | 0.01 |
| Non-alcoholic Fatty C0400966 | SLC6A2  | 6530 P23975  | solute carrier Transporter        | 238  | 0.49  | 0.846 | 0.081524 | 0.01 |
| Non-alcoholic Fatty C0400966 | SNHG20  | #####        | small nucleolar RNA host          | 41   | 0.65  | 0.346 |          | 0.01 |
| Non-alcoholic Fatty C0400966 | SLC10A1 | 6554 Q14973  | solute carrier Transporter        | 54   | 0.626 | 0.462 | 4.79E-16 | 0.01 |
| Non-alcoholic Fatty C0400966 | BMP8B   | 656 P34820   | bone morphogenetic Signaling      | 12   | 0.792 | 0.192 | 0.00019  | 0.01 |
| Non-alcoholic Fatty C0400966 | SLC13A1 | 6561 Q9BZW2  | solute carrier Transporter        | 7    | 0.861 | 0.269 | 1.23E-17 | 0.01 |
| Non-alcoholic Fatty C0400966 | AACS    | 65985 Q86V21 | acetoacetyl CoA Synthetase Enzyme | 12   | 0.751 | 0.308 | 9.13E-17 | 0.01 |

|                              |          |                    |                          |     |       |       |          |      |
|------------------------------|----------|--------------------|--------------------------|-----|-------|-------|----------|------|
| Non-alcoholic Fatty C0400966 | SMPD1    | 6609 P17405        | sphingomy Enzyme         | 247 | 0.499 | 0.885 | 3.89E-10 | 0.01 |
| Non-alcoholic Fatty C0400966 | SIGLEC1  | 6614 Q9BZZ2        | sialic acid binding Ig l | 75  | 0.597 | 0.654 | 5.33E-46 | 0.01 |
| Non-alcoholic Fatty C0400966 | SNAI1    | 6615 O95863        | snail family transcript  | 243 | 0.474 | 0.808 | 0.21754  | 0.01 |
| Non-alcoholic Fatty C0400966 | SORD     | 6652 Q00796        | sorbitol de Enzyme       | 113 | 0.552 | 0.769 | 4.49E-08 | 0.01 |
| Non-alcoholic Fatty C0400966 | SP1      | 6667 P08047        | Sp1 trans Nucleic ac     | 209 | 0.493 | 0.769 | 0.99997  | 0.01 |
| Non-alcoholic Fatty C0400966 | SPRR2A   | 6700 P35326        | small proline rich prot  | 67  | 0.612 | 0.731 |          | 0.01 |
| Non-alcoholic Fatty C0400966 | SQLE     | 6713 Q14534        | squalene e Enzyme        | 36  | 0.674 | 0.577 | 0.97594  | 0.01 |
| Non-alcoholic Fatty C0400966 | AKR1D1   | 6718 P51857        | aldo-keto r Enzyme       | 40  | 0.711 | 0.385 | 1.72E-07 | 0.01 |
| Non-alcoholic Fatty C0400966 | STAR     | 6770 P49675        | steroidogenic acute re   | 177 | 0.513 | 0.808 | 8.77E-11 | 0.01 |
| Non-alcoholic Fatty C0400966 | STAT1    | 6772 P42224        | signal tran Nucleic ac   | 531 | 0.399 | 0.885 | 0.99999  | 0.01 |
| Non-alcoholic Fatty C0400966 | STAT6    | 6778 P42226        | signal tran Nucleic ac   | 281 | 0.475 | 0.808 | 0.98849  | 0.01 |
| Non-alcoholic Fatty C0400966 | SULT1E1  | 6783 P49888        | sulfotransferase famil   | 171 | 0.508 | 0.808 | 1.97E-07 | 0.01 |
| Non-alcoholic Fatty C0400966 | STK11    | 6794 Q15831        | serine/thre Kinase       | 372 | 0.435 | 0.808 | 0.9934   | 0.01 |
| Non-alcoholic Fatty C0400966 | SYT1     | 6857 P21579        | synaptotag Transporte    | 460 | 0.412 | 0.846 | 0.60038  | 0.01 |
| Non-alcoholic Fatty C0400966 | ADAM17   | 6868 P78536        | ADAM metallopeptid       | 316 | 0.453 | 0.808 | 0.99528  | 0.01 |
| Non-alcoholic Fatty C0400966 | MAP3K7   | 6885 O43318        | mitogen-ac Kinase        | 273 | 0.477 | 0.808 | 0.99971  | 0.01 |
| Non-alcoholic Fatty C0400966 | TAZ      | 6901 Q16635        | tafazzin Enzyme          | 252 | 0.477 | 0.808 | 0.72591  | 0.01 |
| Non-alcoholic Fatty C0400966 | MIR33B   | #####              | microRNA 33b             | 61  | 0.601 | 0.615 |          | 0.01 |
| Non-alcoholic Fatty C0400966 | MIR590   | #####              | microRNA 590             | 99  | 0.553 | 0.692 |          | 0.01 |
| Non-alcoholic Fatty C0400966 | TCF7L2   | 6934 Q9NQB0        | transcription factor 7 l | 257 | 0.485 | 0.846 | 0.99537  | 0.01 |
| Non-alcoholic Fatty C0400966 | TFAM     | 7019 Q00059        | transcription factor A,  | 147 | 0.529 | 0.731 | 0.17259  | 0.01 |
| Non-alcoholic Fatty C0400966 | TFF3     | 7033 Q07654        | trefoil fact Signaling   | 163 | 0.518 | 0.885 | 0.01591  | 0.01 |
| Non-alcoholic Fatty C0400966 | TG       | 7038 P01266        | thyroglobu Enzyme m      | 240 | 0.48  | 0.808 | 2.88E-59 | 0.01 |
| Non-alcoholic Fatty C0400966 | TGFB1I1  | 7041 O43294        | transformin Cellular st  | 47  | 0.638 | 0.423 | 0.027032 | 0.01 |
| Non-alcoholic Fatty C0400966 | TSPO     | 706 P30536         | translocator protein     | 341 | 0.444 | 0.885 | 0.000274 | 0.01 |
| Non-alcoholic Fatty C0400966 | THRSP    | 7069 Q92748        | thyroid hormone respc    | 33  | 0.695 | 0.462 | 0.002924 | 0.01 |
| Non-alcoholic Fatty C0400966 | TIMP3    | 7078 P35625        | TIMP met Enzyme m        | 325 | 0.445 | 0.923 | 0.63037  | 0.01 |
| Non-alcoholic Fatty C0400966 | TLL1     | 7092 O43897        | tolloid like 1           | 24  | 0.716 | 0.5   | 0.17306  | 0.01 |
| Non-alcoholic Fatty C0400966 | TLR1     | 7096 Q15399        | toll like receptor 1     | 198 | 0.496 | 0.808 | 5.87E-23 | 0.01 |
| Non-alcoholic Fatty C0400966 | NR2E1    | 7101 Q9Y466        | nuclear rec Nuclear re   | 57  | 0.628 | 0.538 | 0.99864  | 0.01 |
| Non-alcoholic Fatty C0400966 | TM7SF2   | 7108 O76062        | transmemb Enzyme         | 217 | 0.486 | 0.808 | 1.37E-07 | 0.01 |
| Non-alcoholic Fatty C0400966 | TMPO     | 7112 P42166;P42167 | thymopoie Signaling      | 58  | 0.631 | 0.577 | 1.55E-07 | 0.01 |
| Non-alcoholic Fatty C0400966 | TNFAIP3  | 7128 P21580        | TNF alpha Enzyme         | 212 | 0.481 | 0.808 | 0.99972  | 0.01 |
| Non-alcoholic Fatty C0400966 | TNFRSF1A | 7132 P19438        | TNF receptor superfai    | 487 | 0.409 | 0.923 | 0.9949   | 0.01 |
| Non-alcoholic Fatty C0400966 | TP53BP1  | 7158 Q12888        | tumor prot Epigenetic    | 158 | 0.52  | 0.731 | 0.99985  | 0.01 |
| Non-alcoholic Fatty C0400966 | TPO      | 7173 P07202        | thyroid per Enzyme       | 306 | 0.455 | 0.846 | 1.82E-21 | 0.01 |
| Non-alcoholic Fatty C0400966 | C3       | 718 P01024         | compleme Enzyme m        | 343 | 0.445 | 0.885 | 0.90421  | 0.01 |
| Non-alcoholic Fatty C0400966 | TRAF3    | 7187 Q13114        | TNF recep Signaling      | 129 | 0.541 | 0.769 | 0.99869  | 0.01 |
| Non-alcoholic Fatty C0400966 | DNLZ     | ##### Q5SXM8       | DNL-type zinc finger     | 43  | 0.663 | 0.538 | 0.000247 | 0.01 |

|                              |         |                   |                         |     |       |       |          |      |
|------------------------------|---------|-------------------|-------------------------|-----|-------|-------|----------|------|
| Non-alcoholic Fatty C0400966 | HULC    | #####             | hepatocellular carcino  | 72  | 0.606 | 0.538 |          | 0.01 |
| Non-alcoholic Fatty C0400966 | UCP1    | 7350 P25874       | uncoupling Transporte   | 124 | 0.545 | 0.769 | 1.69E-11 | 0.01 |
| Non-alcoholic Fatty C0400966 | UCP3    | 7352 P55916       | uncoupling Transporte   | 66  | 0.619 | 0.577 | 9.55E-10 | 0.01 |
| Non-alcoholic Fatty C0400966 | SLC35A2 | 7355 P78381       | solute carri Transporte | 197 | 0.525 | 0.808 | 0.71792  | 0.01 |
| Non-alcoholic Fatty C0400966 | UGT1A   | 7361              | UDP glucuronosyltrar    | 117 | 0.54  | 0.654 |          | 0.01 |
| Non-alcoholic Fatty C0400966 | UGT2B4  | 7363 P06133       | UDP glucuronosyltrar    | 16  | 0.751 | 0.231 | 4.38E-09 | 0.01 |
| Non-alcoholic Fatty C0400966 | USP4    | 7375 Q13107       | ubiquitin s Enzyme      | 40  | 0.686 | 0.308 | 1.61E-09 | 0.01 |
| Non-alcoholic Fatty C0400966 | UROD    | 7389 P06132       | uroporphyrinogen dec    | 166 | 0.521 | 0.769 | 1.26E-08 | 0.01 |
| Non-alcoholic Fatty C0400966 | UTRN    | 7402 P46939       | utrophin                | 152 | 0.525 | 0.692 | 1E-19    | 0.01 |
| Non-alcoholic Fatty C0400966 | VCAM1   | 7412 P19320       | vascular cell adhesion  | 406 | 0.422 | 0.808 | 0.79791  | 0.01 |
| Non-alcoholic Fatty C0400966 | VEGFC   | 7424 P49767       | vascular er Signaling   | 291 | 0.459 | 0.769 | 0.49565  | 0.01 |
| Non-alcoholic Fatty C0400966 | VIP     | 7432 P01282       | vasoactive Signaling    | 376 | 0.437 | 0.846 | 0.00042  | 0.01 |
| Non-alcoholic Fatty C0400966 | BEST1   | 7439 O76090       | bestrophin Ion channe   | 292 | 0.465 | 0.885 | 1.82E-12 | 0.01 |
| Non-alcoholic Fatty C0400966 | YY1     | 7528 P25490       | YY1 trans( Transcripti  | 245 | 0.481 | 0.808 | 0.9938   | 0.01 |
| Non-alcoholic Fatty C0400966 | ZBTB16  | 7704 Q05516       | zinc finger Transcripti | 154 | 0.545 | 0.808 | 0.99907  | 0.01 |
| Non-alcoholic Fatty C0400966 | DUSP26  | 78986 Q9BV47      | dual specificity phosp  | 35  | 0.682 | 0.346 | 0.00023  | 0.01 |
| Non-alcoholic Fatty C0400966 | ELOVL6  | 79071 Q9H5J4      | ELOVL fa Enzyme         | 51  | 0.623 | 0.731 | 0.96581  | 0.01 |
| Non-alcoholic Fatty C0400966 | APOO    | 79135 Q9BUR5      | apolipoprotein O        | 6   | 0.839 | 0.192 | 0.60201  | 0.01 |
| Non-alcoholic Fatty C0400966 | LAP     | 7939              | Laryngeal adductor pe   | 50  | 0.619 | 0.731 |          | 0.01 |
| Non-alcoholic Fatty C0400966 | PLA2G7  | 7941 Q13093       | phospholip Enzyme       | 136 | 0.537 | 0.769 | 5.33E-22 | 0.01 |
| Non-alcoholic Fatty C0400966 | TFEB    | 7942 P19484       | transcription factor EI | 150 | 0.527 | 0.731 | 0.89931  | 0.01 |
| Non-alcoholic Fatty C0400966 | CALCA   | 796 P01258;P06881 | calcitonin i Signaling  | 467 | 0.416 | 0.923 | 0.015562 | 0.01 |
| Non-alcoholic Fatty C0400966 | AIMP2   | 7965 Q13155       | aminoacyl tRNA synt     | 555 | 0.393 | 0.923 | 0.008024 | 0.01 |
| Non-alcoholic Fatty C0400966 | NLRX1   | 79671 Q86UT6      | NLR famil Enzyme        | 51  | 0.641 | 0.654 | 7.73E-31 | 0.01 |
| Non-alcoholic Fatty C0400966 | KCTD17  | 79734 Q8N5Z5      | potassium channel tet   | 22  | 0.743 | 0.308 | 0.017683 | 0.01 |
| Non-alcoholic Fatty C0400966 | GSDMD   | 79792 P57764      | gasdermin D             | 50  | 0.641 | 0.692 | 1.08E-13 | 0.01 |
| Non-alcoholic Fatty C0400966 | DHDDS   | 79947 Q86SQ9      | dehydrodo Enzyme        | 308 | 0.468 | 0.885 | 0.24533  | 0.01 |
| Non-alcoholic Fatty C0400966 | HKDC1   | 80201 Q2TB90      | hexokinase Kinase       | 26  | 0.743 | 0.269 | 1.62E-14 | 0.01 |
| Non-alcoholic Fatty C0400966 | STAM    | 8027 Q92783       | signal transducing ad   | 20  | 0.736 | 0.269 | 0.85048  | 0.01 |
| Non-alcoholic Fatty C0400966 | CPEB4   | 80315 Q17RY0      | cytoplasmic Nucleic ac  | 70  | 0.621 | 0.462 | 0.98555  | 0.01 |
| Non-alcoholic Fatty C0400966 | COASY   | 80347 Q13057      | Coenzyme Enzyme         | 125 | 0.551 | 0.654 | 8.09E-10 | 0.01 |
| Non-alcoholic Fatty C0400966 | FOSL1   | 8061 P15407       | FOS like 1 Transcripti  | 150 | 0.519 | 0.846 | 0.15849  | 0.01 |
| Non-alcoholic Fatty C0400966 | FGF23   | 8074 Q9GZV9       | fibroblast i Signaling  | 305 | 0.46  | 0.731 | 0.031014 | 0.01 |
| Non-alcoholic Fatty C0400966 | SPX     | 80763 Q9BT56      | spexin hormone          | 33  | 0.695 | 0.462 | 0.00011  | 0.01 |
| Non-alcoholic Fatty C0400966 | SLC7A5  | 8140 Q01650       | solute carri Transporte | 173 | 0.513 | 0.808 | 0.23505  | 0.01 |
| Non-alcoholic Fatty C0400966 | BAS     | 8213              | Beta-adrenergic stimu   | 29  | 0.711 | 0.346 |          | 0.01 |
| Non-alcoholic Fatty C0400966 | SESN2   | 83667 P58004      | sestrin 2 Enzyme        | 169 | 0.508 | 0.808 | 4.19E-07 | 0.01 |
| Non-alcoholic Fatty C0400966 | TRAPPC9 | 83696 Q96Q05      | trafficking protein par | 111 | 0.603 | 0.577 | 2.29E-14 | 0.01 |
| Non-alcoholic Fatty C0400966 | ITCH    | 83737 Q96J02      | itchy E3 ut Enzyme      | 123 | 0.556 | 0.769 | 0.99997  | 0.01 |

|                              |           |              |                                     |     |       |       |          |      |
|------------------------------|-----------|--------------|-------------------------------------|-----|-------|-------|----------|------|
| Non-alcoholic Fatty C0400966 | ANGPTL6   | 83854 Q8NI99 | angiopoietin Signaling              | 48  | 0.656 | 0.462 | 2.37E-08 | 0.01 |
| Non-alcoholic Fatty C0400966 | PLA2G6    | 8398 O60733  | phospholipid Enzyme m               | 350 | 0.476 | 0.846 | 2.48E-10 | 0.01 |
| Non-alcoholic Fatty C0400966 | CHCHD6    | 84303 Q9BRQ6 | coiled-coil-helix-coile             | 7   | 0.839 | 0.269 | 5.57E-09 | 0.01 |
| Non-alcoholic Fatty C0400966 | MAK16     | 84549 Q9BXY0 | MAK16 homolog                       | 96  | 0.566 | 0.615 | 0.96452  | 0.01 |
| Non-alcoholic Fatty C0400966 | DGAT2     | 84649 Q96PD7 | diacylglycerol Enzyme               | 41  | 0.686 | 0.423 | 8.36E-12 | 0.01 |
| Non-alcoholic Fatty C0400966 | CARD6     | 84674 Q9BX69 | caspase recruitment d               | 6   | 0.861 | 0.115 | 3.39E-13 | 0.01 |
| Non-alcoholic Fatty C0400966 | FAM83A    | 84985 Q86UY5 | family with sequence                | 20  | 0.76  | 0.192 | 3.03E-07 | 0.01 |
| Non-alcoholic Fatty C0400966 | PIK3R3    | 8503 Q92569  | phosphoinositide Enzyme m           | 101 | 0.556 | 0.692 | 3.36E-10 | 0.01 |
| Non-alcoholic Fatty C0400966 | CYP4F2    | 8529 P78329  | cytochrome Enzyme                   | 44  | 0.674 | 0.308 | 7.58E-17 | 0.01 |
| Non-alcoholic Fatty C0400966 | DENR      | 8562 O43583  | density regulation Enzyme           | 121 | 0.543 | 0.692 | 0.87514  | 0.01 |
| Non-alcoholic Fatty C0400966 | RUNX2     | 860 Q13950   | RUNX family Transcription           | 405 | 0.437 | 0.846 | 0.94884  | 0.01 |
| Non-alcoholic Fatty C0400966 | RTCA      | 8634 O00442  | RNA 3'-terminal Enzyme              | 22  | 0.736 | 0.385 | 3.09E-09 | 0.01 |
| Non-alcoholic Fatty C0400966 | DGAT1     | 8694 O75907  | diacylglycerol Enzyme               | 64  | 0.621 | 0.615 | 1.41E-17 | 0.01 |
| Non-alcoholic Fatty C0400966 | ABCC3     | 8714 O15438  | ATP binding Transmembrane           | 160 | 0.517 | 0.769 | 1.21E-26 | 0.01 |
| Non-alcoholic Fatty C0400966 | MBTPS1    | 8720 Q14703  | membrane Enzyme                     | 148 | 0.532 | 0.692 | 7.59E-09 | 0.01 |
| Non-alcoholic Fatty C0400966 | TNFSF14   | 8740 O43557  | TNF superfamily Signaling           | 143 | 0.529 | 0.769 | 0.051663 | 0.01 |
| Non-alcoholic Fatty C0400966 | DLK1      | 8788 P80370  | delta like 1 Signaling              | 144 | 0.527 | 0.692 | 0.034576 | 0.01 |
| Non-alcoholic Fatty C0400966 | TRIM24    | 8805 O15164  | tripartite motif containing         | 79  | 0.581 | 0.615 | 1        | 0.01 |
| Non-alcoholic Fatty C0400966 | CES2      | 8824 O00748  | carboxylesterase Enzyme             | 87  | 0.584 | 0.731 | 3.58E-16 | 0.01 |
| Non-alcoholic Fatty C0400966 | HDAC3     | 8841 O15379  | histone deacetylase Epigenetic      | 179 | 0.511 | 0.731 | 0.56737  | 0.01 |
| Non-alcoholic Fatty C0400966 | SQSTM1    | 8878 Q13501  | sequestosome 1                      | 470 | 0.428 | 0.885 | 0.00086  | 0.01 |
| Non-alcoholic Fatty C0400966 | CCNC      | 892 P24863   | cyclin C Enzyme m                   | 24  | 0.695 | 0.462 | 0.99914  | 0.01 |
| Non-alcoholic Fatty C0400966 | MBD2      | 8932 Q9UBB5  | methyldomains Epigenetic            | 256 | 0.466 | 0.846 | 0.34957  | 0.01 |
| Non-alcoholic Fatty C0400966 | WNT3A     | 89780 P56704 | Wnt family Signaling                | 141 | 0.532 | 0.769 | 0.96491  | 0.01 |
| Non-alcoholic Fatty C0400966 | CCRL2     | 9034 O00421  | C-C motif G-protein coupled         | 59  | 0.621 | 0.654 | 0.36861  | 0.01 |
| Non-alcoholic Fatty C0400966 | TBL1Y     | 90665 Q9BQ87 | transducin beta like 1              | 22  | 0.705 | 0.385 | 4.03E-13 | 0.01 |
| Non-alcoholic Fatty C0400966 | MYOM2     | 9172 P54296  | myomesin 2                          | 103 | 0.57  | 0.692 | 7.01E-85 | 0.01 |
| Non-alcoholic Fatty C0400966 | TIMD4     | 91937 Q96H15 | T cell immunoglobulin               | 49  | 0.644 | 0.654 | 2.64E-10 | 0.01 |
| Non-alcoholic Fatty C0400966 | ZNF300    | 91975 Q96RE9 | zinc finger protein 300             | 16  | 0.76  | 0.115 | 1.12E-05 | 0.01 |
| Non-alcoholic Fatty C0400966 | HACD1     | 9200 B0YJ81  | 3-hydroxyacyl-CoA dehydratase       | 160 | 0.539 | 0.846 | 1.29E-09 | 0.01 |
| Non-alcoholic Fatty C0400966 | NOG       | 9241 Q13253  | noggin                              | 206 | 0.518 | 0.731 | 0.89026  | 0.01 |
| Non-alcoholic Fatty C0400966 | GLP2R     | 9340 O95838  | glucagon like G-protein coupled     | 28  | 0.705 | 0.269 | 2.64E-11 | 0.01 |
| Non-alcoholic Fatty C0400966 | COX5A     | 9377 P20674  | cytochrome c oxidase Enzyme         | 171 | 0.515 | 0.846 | 0.49407  | 0.01 |
| Non-alcoholic Fatty C0400966 | GRAP2     | 9402 O75791  | GRB2 related adaptor                | 538 | 0.394 | 0.923 | 0.000153 | 0.01 |
| Non-alcoholic Fatty C0400966 | TMPRSS11D | 9407 O60235  | transmembrane Enzyme                | 48  | 0.636 | 0.538 | 1.2E-05  | 0.01 |
| Non-alcoholic Fatty C0400966 | EIF2AK3   | 9451 Q9NZJ5  | eukaryotic Kinase                   | 231 | 0.501 | 0.808 | 0.00276  | 0.01 |
| Non-alcoholic Fatty C0400966 | GGPS1     | 9453 O95749  | geranylgeranyl diphosphate synthase | 44  | 0.647 | 0.577 | 0.26866  | 0.01 |
| Non-alcoholic Fatty C0400966 | ATG5      | 9474 Q9H1Y0  | autophagy Transmembrane             | 282 | 0.462 | 0.885 | 0.97758  | 0.01 |
| Non-alcoholic Fatty C0400966 | LITAF     | 9516 Q99732  | lipopolysaccharide Transcription    | 59  | 0.65  | 0.462 | 0.030752 | 0.01 |

|                              |        |             |                        |     |       |       |          |      |
|------------------------------|--------|-------------|------------------------|-----|-------|-------|----------|------|
| Non-alcoholic Fatty C0400966 | CLOCK  | 9575 O15516 | clock circadian regula | 309 | 0.463 | 0.885 | 0.99957  | 0.01 |
| Non-alcoholic Fatty C0400966 | CD44   | 960 P16070  | CD44 molecule (India   | 711 | 0.363 | 0.962 | 2.45E-07 | 0.01 |
| Non-alcoholic Fatty C0400966 | ABCG1  | 9619 P45844 | ATP bindi Transporte   | 118 | 0.56  | 0.692 | 0.11182  | 0.01 |
| Non-alcoholic Fatty C0400966 | KEAP1  | 9817 Q14145 | kelch like ECH associ  | 251 | 0.475 | 0.808 | 0.000388 | 0.01 |
| Non-alcoholic Fatty C0400966 | PLPPR4 | 9890 Q7Z2D5 | phospholip Enzyme      | 10  | 0.839 | 0.154 | 0.86104  | 0.01 |
| Non-alcoholic Fatty C0400966 | MFN2   | 9927 O95140 | mitofusin 2 Enzyme     | 334 | 0.471 | 0.846 | 0.99415  | 0.01 |
| Non-alcoholic Fatty C0400966 | CDC42  | 998 P60953  | cell divisio Enzyme m  | 327 | 0.458 | 0.846 | 0.78728  | 0.01 |
| Non-alcoholic Fatty C0400966 | CDH1   | 999 P12830  | cadherin 1             | 508 | 0.401 | 0.808 | 0.14631  | 0.01 |

#### Information of OMIM

OMIM Search - 'non-alcoholic fatty liver '

Downloaded: Dec 14, 2020

Copyright (c) 1966-2020 Johns Hopkins University OMIM, data are provided for research purposes only.

| MIM Number | Title                                                 | Included Titles | Cytoge Genomic Coordin Entrez Gene ID |
|------------|-------------------------------------------------------|-----------------|---------------------------------------|
| %613282    | FATTY LIVER DISEASE, NONALCOHOLIC, SUSCLIVER DISEASE, |                 | 22q13.22:37200000-508 100380876       |
| %613387    | FATTY LIVER DISEASE, NONALCOHOLIC, SUSCL              |                 | 11q23.11:110600000-12 100462725       |
| #603471    | CITRULLINEMIA, TYPE II, ADULT-ONSET; CTLN             |                 | 7q21.3                                |
| *601739    | MEIS HOMEODOMAIN 1; MEIS1                             |                 | 2p14.2:66435124-6657 4211             |
| %228100    | VISCERAL STEATOSIS, CONGENITAL                        |                 |                                       |
| *107720    | APOLIPOPROTEIN C-III; APOC3                           | APOC3/APOA1 FC  | 11q23.11:116829906-11 345             |
| *134650    | FATTY ACID-BINDING PROTEIN 1; FABP1                   |                 | 2p11.2:2:88122981-8812 2168           |
| *603030    | TOLL-LIKE RECEPTOR 4; TLR4                            |                 | 9q33.19:117704402-117 7099            |
| *138030    | GLUCAGON; GCG                                         | GLUCAGON-LIKI   | 2q24.22:162142881-162 2641            |
| *600953    | INTERLEUKIN 18; IL18                                  |                 | 11q23.11:112143250-11 3606            |
| *609567    | PATATIN-LIKE PHOSPHOLIPASE DOMAIN-CON                 |                 | 22q13.22:43923804-439 80339           |
| *603598    | TUMOR NECROSIS FACTOR LIGAND SUPERFAM                 |                 | 3q26.33:172505507-172 8743            |
| %612364    | ALANINE AMINOTRANSFERASE, PLASMA LEV                  |                 |                                       |
| *147265    | INOSITOL 1,4,5-TRIPHOSPHATE RECEPTOR, TY              |                 | 3p26.13:4493347-48475 3708            |
| *613524    | SEROLOGICALLY DEFINED COLON CANCER AI                 |                 | 1q43-q1:243255417-243 10806           |
| #144250    | HYPERLIPIDEMIA, FAMILIAL COMBINED, 3; FC              |                 | 8p21.3                                |
| #615993    | BARDET-BIEDL SYNDROME 16; BBS16                       |                 | 1q43-q                                |
| %604499    | HYPERLIPIDEMIA, FAMILIAL COMBINED, 2; FC              |                 | 11p 28515                             |
| *134651    | FATTY ACID-BINDING PROTEIN 3; FABP3                   |                 | 1p35.21:31359594-3137 2170            |
| *600691    | SOLUTE CARRIER FAMILY 27 (FATTY ACID TR               |                 | 19p13.19:17468744-175 376497          |
| *603247    | SOLUTE CARRIER FAMILY 27 (FATTY ACID TR               |                 | 15q21.15:50182195-502 11001           |
| *605168    | FATTY ACID-BINDING PROTEIN 5; FABP5                   |                 | 8q21.18:81280535-8128 2171            |
| *611026    | FATTY ACID 2-HYDROXYLASE; FA2H                        |                 | 16q23.16:74712954-747 79152           |
| *611546    | ELONGATION OF VERY LONG CHAIN FATTY A                 |                 | 4q25.4:110045845-110 79071            |

|         |                                           |                                  |
|---------|-------------------------------------------|----------------------------------|
| #240600 | GLYCOGEN STORAGE DISEASE 0, LIVER; GSD0   | 12p12.                           |
| #270200 | SJOGREN-LARSSON SYNDROME; SLS             | 17p11.                           |
| *173510 | CD36 ANTIGEN; CD36                        | 7q21.1 7:80602206-8067 948       |
| *134640 | FATTY ACID-BINDING PROTEIN 2; FABP2       | 4q26 4:119317249-119 2169        |
| *600422 | FATTY ACID-BINDING PROTEIN 6; FABP6       | 5q33.3 5:160187380-160 2172      |
| *600434 | FATTY ACID-BINDING PROTEIN 4; FABP4       | 8q21.1 8:81478418-8148 2167      |
| *600976 | FAT ATYPICAL CADHERIN 1; FAT1             | 4q35.2 4:186587788-186 2195      |
| *602965 | FATTY ACID-BINDING PROTEIN 7; FABP7       | 6q22.3 6:122749200-122 2173      |
| *603314 | SOLUTE CARRIER FAMILY 27 (FATTY ACID TR.  | 19q13. 19:58498332-585 10998     |
| *604193 | SOLUTE CARRIER FAMILY 27 (FATTY ACID TR.  | 1q21.3 1:153775406-153 11000     |
| *604194 | SOLUTE CARRIER FAMILY 27 (FATTY ACID TR.  | 9q34.1 9:128340515-128 10999     |
| *604196 | SOLUTE CARRIER FAMILY 27 (FATTY ACID TR.  | 28965                            |
| *604269 | FAT ATYPICAL CADHERIN 2; FAT2             | 5q33.1 5:151504091-151 2196      |
| *152425 | ACYL-CoA SYNTHETASE LONG CHAIN FAMILY     | 4q35.1 4:184755594-184 2180      |
| *612028 | FAT STORAGE-INDUCING TRANSMEMBRANE F      | 14q12 14:24130658-241 161247     |
| *612029 | FAT STORAGE-INDUCING TRANSMEMBRANE F      | 20q13. 20:44302839-443 128486    |
| *612411 | FAT ATYPICAL CADHERIN 4; FAT4             | 4q28.1 4:125314917-125 79633     |
| *612483 | FAT ATYPICAL CADHERIN 3; FAT3             | 11q14. 11:92224635-928 120114    |
| *614451 | ELONGATION OF VERY LONG CHAIN FATTY A     | 5q12.1 5:60751790-6084 79993     |
| #114550 | HEPATOCELLULAR CARCINOMA                  | HEPATOBLASTO 2q33.1              |
| #306000 | GLYCOGEN STORAGE DISEASE IXa1; GSD9A1     | GLYCOGEN STOI Xp22.1             |
| #261750 | GLYCOGEN STORAGE DISEASE IXb; GSD9B       | 16q12.                           |
| #615486 | INTERSTITIAL LUNG AND LIVER DISEASE; ILLI | 12q13.                           |
| *171760 | ALKALINE PHOSPHATASE, LIVER; ALPL         | 1p36.1 1:21508983-2157 249       |
| *171860 | PHOSPHOFRUCTOKINASE, LIVER TYPE; PFKL     | 21q22. 21:44300039-443 5211      |
| *138571 | GLYCOGEN SYNTHASE 2; GYS2                 | 12p12. 12:21531526-216 2998      |
| *189965 | CCAAT/ENHANCER-BINDING PROTEIN, BETA; C   | 20q13. 20:50190582-501 1051      |
| *600528 | CARNITINE PALMITOYLTRANSFERASE I, LIVER   | 11q13. 11:68754619-688 1374      |
| *604426 | CYTOCHROME P450, FAMILY 4, SUBFAMILY F,   | 19p13. 19:15878022-158 8529      |
| *609712 | PYRUVATE KINASE, LIVER AND RED BLOOD C    | 1q22 1:155289292-155 5313        |
| *613009 | O-PHOSPHOSERINE tRNA-SELENOCYSTEINE tR    | 4p15.2 4:25120013-2516 51091     |
| #144650 | HYPERLIPOPROTEINEMIA, TYPE V              | 11q23.                           |
| #221770 | POLYCYSTIC LIPOMEMBRANOUS OSTEODYSP       | 19q13.                           |
| #275630 | CHANARIN-DORFMAN SYNDROME; CDS            | 3p21.3                           |
| #612319 | SPASTIC PARAPLEGIA 35, AUTOSOMAL RECES    | 16q23.                           |
| #616154 | PEROXISOMAL FATTY ACYL-CoA REDUCTASE      | 11p15.                           |
| %612795 | POLYUNSATURATED FATTY ACIDS PLASMA L      | 11q12- 11:55800000-661 100302559 |
| 138920  | GRANDDAD SYNDROME                         |                                  |
| 603376  | LONG CHAIN FATTY ACIDS, DEFECT IN TRANS   |                                  |



|         |                                            |                |                               |
|---------|--------------------------------------------|----------------|-------------------------------|
| *134660 | GLUTATHIONE S-TRANSFERASE, PI; GSTP1       | GLUTATHIONE S  | 11q13.11:67583811-675 2950    |
| *600212 | FATTY ACID SYNTHASE; FASN                  |                | 17q25.17:82078337-820 2194    |
| *601310 | CYTOCHROME P450, SUBFAMILY IVA, POLYPE     |                | 1p33 1:46929176-4694 1579     |
| *602281 | MILK FAT GLOBULE-EGF FACTOR 8; MFGE8       | MEDIN, INCLUDE | 15q26.15:88898682-889 4240    |
| *602371 | ACYL-CoA SYNTHETASE LONG CHAIN FAMILY      |                | 2q36.12:222861035-222 2181    |
| *602935 | FATTY ACID AMIDE HYDROLASE; FAAH           |                | 1p33 1:46394316-4641 2166     |
| *300072 | UBIQUITIN-SPECIFIC PROTEASE 9, X-LINKED; U |                | Xp11.4 X:41085419-4123 8239   |
| *300157 | ACYL-CoA SYNTHETASE LONG CHAIN FAMILY      |                | Xq23 X:109641334-109 2182     |
| *300654 | FATTY ACID AMIDE HYDROLASE 2; FAAH2        |                | Xp11.2 X:57121860-5748 158584 |
| *400005 | UBIQUITIN-SPECIFIC PROTEASE 9, Y CHROMO    |                | Yq11.2 Y:12701230-1286 8287   |
| *603820 | FREE FATTY ACID RECEPTOR 1; FFAR1          |                | 19q13.19:35351541-353 2864    |
| *603821 | FREE FATTY ACID RECEPTOR 3; FFAR3          |                | 19q13.19:35358105-353 2865    |
| *603823 | FREE FATTY ACID RECEPTOR 2; FFAR2          |                | 19q13.19:35448256-354 2867    |
| *604443 | ACYL-CoA SYNTHETASE LONG CHAIN FAMILY      | ACS2/ETV6 FUSI | 5q31.1 5:131949972-132 23305  |
| *605512 | ELONGATION OF VERY LONG CHAIN FATTY A      |                | 6q14.1 6:79914813-7994 6785   |
| *605677 | ACYL-CoA SYNTHETASE LONG CHAIN FAMILY      |                | 10q25.10:112374115-11 51703   |
| *606148 | FATTY ACID DESATURASE 1; FADS1             |                | 11q12.11:61799626-618 3992    |
| *606149 | FATTY ACID DESATURASE 2; FADS2             |                | 11q12.11:61816202-618 9415    |
| *606150 | FATTY ACID DESATURASE 3; FADS3             |                | 11q12.11:61873525-618 3995    |
| *606803 | ACYL-CoA THIOESTERASE 11; ACOT11           | BFIT1, INCLUDE | 1p32.3 1:54548227-5463 26027  |
| *609044 | FREE FATTY ACID RECEPTOR 4; FFAR4          |                | 10q23.10:93566177-935 338557  |
| *609196 | MELANOCORTIN 2 RECEPTOR ACCESSORY PR       |                | 21q22.21:32291812-323 56246   |
| *609523 | ALDEHYDE DEHYDROGENASE, FAMILY 3, SUB      |                | 17p11.17:19648135-196 224     |
| *610966 | FTO ALPHA-KETOGLUTARATE-DEPENDENT DI       |                | 16q12.16:53703962-541 79068   |
| *611647 | ARV1 HOMOLOG, FATTY ACID HOMEOSTASIS       |                | 1q42.2 1:230979081-231 64801  |
| *611805 | ELONGATION OF VERY LONG CHAIN FATTY A      |                | 6p12.1 6:53267403-5334 60481  |
| *611813 | ELONGATION OF VERY LONG CHAIN FATTY A      |                | 1p34.2 1:43363400-4336 64834  |
| *611814 | ELONGATION OF VERY LONG CHAIN FATTY A      |                | 6p24.2 6:10980758-1104 54898  |
| *611815 | ELONGATION OF VERY LONG CHAIN FATTY A      |                | 10q24.10:102224766-10 83401   |
| *612120 | CELL DEATH-INDUCING DFFA-LIKE EFFECTOR     |                | 3p25.3 3:9866709-98802 63924  |
| *613409 | LACCASE (MULTICOPPER REDUCTASE) DOMA       |                | 13q14.13:43879177-438 144811  |
| *614359 | ACYL-CoA SYNTHETASE MEDIUM CHAIN FAM       |                | 16p12.16:20536225-205 348158  |
| *616107 | FATTY ACYL CoA REDUCTASE 1; FAR1           |                | 11p15.11:13668665-137 84188   |
| *616156 | FATTY ACYL CoA REDUCTASE 2; FAR2           |                | 12p11.12:29149100-293 55711   |
| *618375 | FATTY ACID AMIDE HYDROLASE PSEUDOGEN       |                | 1p33 1:46433826-4644 729041   |
| *618923 | FATTY ACID-BINDING PROTEIN 12; FABP12      |                | 8q21.1 8:81524672-8159 646486 |
| +100650 | ALDEHYDE DEHYDROGENASE 2 FAMILY; ALD       | SUBLINGUAL NI  | 12q24.12:111766932-11 217     |
| +142830 | MAJOR HISTOCOMPATIBILITY COMPLEX, CLA      | ABACAVIR HYPE  | 6p21.3 6:31353874-3135 3106   |
| #173900 | POLYCYSTIC KIDNEY DISEASE 1 WITH OR WIT    |                | 16p13.                        |

|          |                                                        |                                          |
|----------|--------------------------------------------------------|------------------------------------------|
| #174050  | POLYCYSTIC LIVER DISEASE 1 WITH OR WITHO               | 19p13.                                   |
| #142330  | HEPATIC ADENOMAS, FAMILIAL                             | 12q24.                                   |
| #203700  | MITOCHONDRIAL DNA DEPLETION SYNDROM                    | 15q26.                                   |
| #600666  | POLYCYSTIC KIDNEY DISEASE 3 WITH OR WIT                | 11q12.                                   |
| #232700  | GLYCOGEN STORAGE DISEASE VI; GSD6                      | 14q22.                                   |
| #253250  | MULIBREY NANISM                                        | 17q22                                    |
| #263200  | POLYCYSTIC KIDNEY DISEASE 4 WITH OR WIT HEPATIC FIBROS | 6p12.3                                   |
| #613070  | LIVER FAILURE, INFANTILE, TRANSIENT; LFT               | 22q13.                                   |
| #613095  | POLYCYSTIC KIDNEY DISEASE 2 WITH OR WIT                | 4q22.1                                   |
| #613658  | RAJAB INTERSTITIAL LUNG DISEASE WITH BR                | 2q36.1                                   |
| #615438  | INFANTILE LIVER FAILURE SYNDROME 1; ILFS               | 5q32                                     |
| #616483  | INFANTILE LIVER FAILURE SYNDROME 2; ILFS               | 2p24.3                                   |
| #616719  | SPINOCEREBELLAR ATAXIA, AUTOSOMAL RE                   | 11q13.                                   |
| #617004  | POLYCYSTIC LIVER DISEASE 2 WITH OR WITHO               | 6q21                                     |
| #617874  | POLYCYSTIC LIVER DISEASE 3 WITH OR WITHO               | 11q14.                                   |
| #617875  | POLYCYSTIC LIVER DISEASE 4 WITH OR WITHO               | 11q13.                                   |
| #618061  | POLYCYSTIC KIDNEY DISEASE 6 WITH OR WIT                | 3q27.3                                   |
| #618641  | INFANTILE LIVER FAILURE SYNDROME 3; ILFS               | 7q22.3                                   |
| % 189800 | PREECLAMPSIA/ECLAMPSIA 1; PEE1                         | HYPERTENSION, 2p13 2:68400000-7480 5177  |
| 123997   | CYTOCHROME c OXIDASE, SUBUNIT 7A2, PSEU                | 1348                                     |
| 602114   | NEPHROPATHY, PROGRESSIVE TUBULOINTER;                  |                                          |
| 605944   | LIVER FIBROCYSTIC DISEASE AND POLYDACT                 |                                          |
| *100640  | ALDEHYDE DEHYDROGENASE 1 FAMILY, MEM                   | 9q21.1 9:72900670-7295 216               |
| *114835  | CARBOXYLESTERASE 1; CES1                               | 16q12. 16:55802850-558 1066              |
| *123996  | CYTOCHROME c OXIDASE, SUBUNIT 7A2; COX                 | 6q14.1 6:75237674-7525 1347              |
| *601394  | CHEMOKINE, CC MOTIF, LIGAND 16; CCL16                  | 17q12 17:35976492-359 6360               |
| *165320  | LIVER CANCER ONCOGENE; LCO                             | 2q14-q 2:112200000-136                   |
| *172471  | PHOSPHORYLASE KINASE, TESTIS/LIVER, GAM                | 16p11. 16:30748424-307 5261              |
| *136130  | FLAVIN-CONTAINING MONOOXYGENASE 1; FM                  | 1q24.3 1:171248472-171 2326              |
| *136131  | FLAVIN-CONTAINING MONOOXYGENASE 4; FM                  | 1q24.3 1:171314130-171 2329              |
| *138079  | GLUCOKINASE; GCK                                       | 7p13 7:44143212-4418 2645                |
| *138160  | SOLUTE CARRIER FAMILY 2 (FACILITATED GL                | 3q26.2 3:170996340-171 6514              |
| *138200  | GLUTAMATE PYRUVATE TRANSAMINASE; GP                    | 8q24.3 8:144503067-144 2875              |
| *138350  | GLUTATHIONE S-TRANSFERASE, MU-1; GSTM1                 | 1p13.3 1:109687816-109 2944              |
| *138360  | GLUTATHIONE S-TRANSFERASE, ALPHA-2; GS                 | 6p12.2 6:52750086-5276 2939              |
| *182790  | SPECTRIN, BETA, NONERYTHROCYTIC, 1; SPT                | 2p16.2 2:54456326-5467 6711              |
| *189907  | HNF1 HOMEBOX B; HNF1B                                  | 17q12 17:37686430-377 6928               |
| *192090  | CADHERIN 1; CDH1                                       | 16q22. 16:68737291-688 999               |
| *600043  | SULFOTRANSFERASE FAMILY 1E, ESTROGEN-F                 | ARYL SULFOTR 4q13.3 4:69841211-6986 6783 |

|         |                                                      |                               |
|---------|------------------------------------------------------|-------------------------------|
| *600924 | GROWTH FACTOR, ERV1-LIKE; GFER                       | 16p13.16:1984192-1987 2671    |
| *601584 | PROTEIN-TYROSINE PHOSPHATASE, TYPE 4A, 1             | 1p35.2.1:31906420-3193 8073   |
| *601585 | PROTEIN-TYROSINE PHOSPHATASE, TYPE 4A, 1             | 6q12.6:63516439-6358 7803     |
| *602072 | CYTOCHROME c OXIDASE, SUBUNIT 6A1; COX6A1            | 12q24.12:120438112-12 1337    |
| *602131 | PLECKSTRIN HOMOLOGY-LIKE DOMAIN, FAMILY 1            | 11p15.11:2928272-2929 7262    |
| *602423 | NUCLEAR RECEPTOR SUBFAMILY 1, GROUP H, 1             | 11p11.11:47248299-472 10062   |
| *602587 | ACYL-CoA THIOESTERASE 7; ACOT7                       | 1p36.3.1:6264271-63937 11332  |
| *603017 | CADHERIN 17; CDH17                                   | 8q22.18:94127161-9421 1015    |
| *300151 | SOLUTE CARRIER FAMILY 25 (MITOCHONDRIA)              | Xp22.2.X:1386151-13921293     |
| *300689 | START DOMAIN-CONTAINING PROTEIN 8; STARD8            | Xq13.1X:68647665-6872 9754    |
| *300798 | PHOSPHORYLASE KINASE, LIVER, ALPHA-2 SUBUNIT         | Xp22.1X:18892297-1898 5256    |
| *304040 | GAP JUNCTION PROTEIN, BETA-1; GJB1                   | Xq13.1X:71215238-7122 2705    |
| *311790 | 6-PHOSPHOFRUCTO-2-KINASE/FRUCTOSE-2,6-BISPHOSPHATASE | Xp11.2X:54932960-5500 5207    |
| *604258 | DLC1 RHO GTPase ACTIVATING PROTEIN; DLC1             | 8p22.8:13083360-1360 10395    |
| *604453 | NUCLEAR RECEPTOR SUBFAMILY 5, GROUP A, 1             | 1q32.1.1:200027709-200 2494   |
| *604843 | SOLUTE CARRIER ORGANIC ANION TRANSPORTER 1           | 12p12.12:21131193-212 10599   |
| *605872 | C-TYPE LECTIN DOMAIN FAMILY 4, MEMBER 1              | 19p13.19:7763242-7769 10332   |
| *606365 | GLUTAMINASE 2; GLS2                                  | 12q13.12:56470951-564 27165   |
| *606464 | HEPCIDIN ANTIMICROBIAL PEPTIDE; HAMP                 | 19q13.19:35282527-352 57817   |
| *606567 | TRANSMEMBRANE 4 SUPERFAMILY, MEMBER 1                | 3q25.1.3:149474696-149 7104   |
| *607620 | COLLECTIN 10; COLEC10                                | 8q24.1.8:118952232-119 10584  |
| *608313 | ARGINASE 1; ARG1                                     | 6q23.2.6:131573225-131 383    |
| *608603 | GLIOMEDIN; GLDN                                      | 15q21.15:51341654-514 342035  |
| *609330 | ONCOPROTEIN-INDUCED TRANSCRIPT 3, MOUSE              | 10q22.10:72893738-729 170392  |
| *609866 | START DOMAIN-CONTAINING PROTEIN 13; STARD13          | 13q13.13:33103136-336 90627   |
| *610160 | ZINC FINGER PROTEIN 367; ZNF367                      | 9q22.3.9:96385940-9641 195828 |
| *610541 | PROTEIN PHOSPHATASE 1, REGULATORY SUBUNIT 1          | 8p23.1.8:9136254-91515 79660  |
| *610550 | METHIONINE ADENOSYLTRANSFERASE I, ALPHEA             | 10q22.10:80271819-802 4143    |
| *611327 | DNAJ/HSP40 HOMOLOG, SUBFAMILY B, MEMBER 1            | 1p31.1.1:77979174-7801 11080  |
| *611373 | LIVER-EXPRESSED ANTIMICROBIAL PEPTIDE 2              | 5q31.1.5:132873667-132 116842 |
| *611570 | FRUCTOSE-1,6-BISPHOSPHATASE 1; FBP1                  | 9q22.3.9:94603132-9464 2203   |
| *612203 | NUCLEOSOME ASSEMBLY PROTEIN 1-LIKE 5; NUP133         | 4q22.1.4:88695912-8869 266812 |
| *612210 | HIGHLY UPREGULATED IN LIVER CANCER; HULC             | 6p24.3.6:8652208-86538 728655 |
| *613039 | CHROMODOMAIN HELICASE DNA-BINDING PROTEIN            | 1q21.1.1:147172746-147 9557   |
| *613741 | GLYCOGEN PHOSPHORYLASE, LIVER; PYGL                  | 14q22.14:50905216-509 5836    |
| *616065 | PILR-ALPHA-ASSOCIATED NEURAL PROTEIN; PILRA          | 12p13.12:6689704-6700 196500  |
| *616256 | C-TYPE LECTIN DOMAIN FAMILY 4, MEMBER C              | 19p13.19:7728956-7732 339390  |
| *616594 | ARF GTPase-ACTIVATING PROTEIN WITH SH3 DOMAIN        | 1p36.1.1:23428562-2348 55616  |
| *617084 | TRANSMEMBRANE PROTEIN 59; TMEM59                     | 1p32.3.1:54026680-5405 9528   |

|         |                                          |                 |                             |
|---------|------------------------------------------|-----------------|-----------------------------|
| *103720 | ALCOHOL DEHYDROGENASE 1B, CLASS I, BET.  | 4q23            | 4:99304970-9932 125         |
| *608759 | CYTOGLOBIN; CYGB                         | 17q25.17        | 76527355-765 114757         |
| #167800 | PANCREATITIS, HEREDITARY; PCTT           | PANCREATITIS, C | 1p36.2                      |
| *601728 | PHOSPHATASE AND TENSIN HOMOLOG; PTEN     | 10q23.10        | 87863624-879 5728           |
| *103730 | ALCOHOL DEHYDROGENASE 1C, GAMMA POL      | 4q23            | 4:99336496-9935 126         |
| *601532 | CASPASE 6, APOPTOSIS-RELATED CYSTEINE PI | 4q25            | 4:109688627-109 839         |
| #239850 | CANTU SYNDROME                           | 12p12.          |                             |
| %277730 | WERNICKE-KORSAKOFF SYNDROME              |                 |                             |
| *601487 | PEROXISOME PROLIFERATOR-ACTIVATED RECP   | PPARG1, INCLUD  | 3p25.2 3:12287367-1243 5468 |
| +170998 | PEROXISOME PROLIFERATOR-ACTIVATED RECH   | HYPERAPOBETA    | 22q13.22:46150525-462 5465  |
| *164160 | LEPTIN; LEP                              | 7q32.1 7        | 128241200-128 3952          |
| *604517 | PEROXISOME PROLIFERATOR-ACTIVATED RECP   | 4p15.2 4        | :23792020-2447 10891        |
| #609016 | LONG-CHAIN 3-HYDROXYACYL-CoA DEHYDR      | 2p23.3          |                             |
| #103780 | ALCOHOL DEPENDENCE                       | ALCOHOL DEPE    | 4p12, 4                     |
| #188890 | TOBACCO ADDICTION, SUSCEPTIBILITY TO     | 5p15.3          |                             |
| *126450 | DOPAMINE RECEPTOR D2; DRD2               | 11q23.11        | :113409604-11 1813          |
| *600890 | HYDROXYACYL-CoA DEHYDROGENASE/3-KET      | 2p23.3 2        | :26190634-2624 3030         |
| *601860 | 17-BETA-HYDROXYSTEROID DEHYDROGENAS      | 5q23.1 5        | :119452496-119 3295         |
| #231680 | MULTIPLE ACYL-CoA DEHYDROGENASE DEFIC    | GLUTARIC ACID   | 4q32.1                      |
| #214100 | PEROXISOME BIOGENESIS DISORDER 1A (ZELI  | PEROXISOME BI   | 7q21.2                      |

This search returned 6,302 entries which exceeded the maximum of 200 so the results were truncated

You can register for MIMmatch ( <https://omim.org/mimmatch/> ) to raise this limit to 1,000

You can register for downloads ( <https://omim.org/downloads> ) and/or the API ( <https://omim.org/api> ) for more search/download options
