# Supplementary material for: Action Mechanism Underlying Improvement Effect of Fuzi Lizhong Decoction on Nonalcoholic Fatty Liver Disease: A Study Based on Network Pharmacology and Molecular Docking
Source: Hindawi journal article supplement (doi:10.1155/2022/1670014), 2022-01-20
Supplement: f1 [file 1670014.f1.zip]

| Detailed Information of 738 Compounds |                                                |        |       |      |      |        |        |       |      |       |       |      |        |
|---------------------------------------|------------------------------------------------|--------|-------|------|------|--------|--------|-------|------|-------|-------|------|--------|
| Mol ID                                | Molecule Name                                  | MW     | AlogP | Hdon | Hacc | OB (%) | Caco-2 | BBB   | DL   | FASA- | HL    | Save | Source |
| MOL000012                             | Arachic acid                                   | 312.6  | 8.19  | 1    | 2    | 16.66  | 1.18   | 1.09  | 0.19 | 0.18  |       |      |        |
| MOL000131                             | EIC                                            | 280.5  | 6.39  | 1    | 2    | 41.9   | 1.16   | 0.9   | 0.14 | 0.25  | 7.5   |      |        |
| MOL001393                             | myristic acid                                  | 228.42 | 5.46  | 1    | 2    | 21.18  | 1.07   | 0.99  | 0.07 | 0.19  |       |      |        |
| MOL001744                             | uracil                                         | 112.1  | -1.01 | 2    | 4    | 42.53  | 0.05   | -0.08 | 0.02 | 0     | 11.77 |      |        |
| MOL002089                             | mesaconitine                                   | 631.79 | -1.33 | 3    | 12   | 8.7    | -0.35  | -0.95 | 0.25 | 0.2   |       |      |        |
| MOL002093                             | benzoylmesaconine                              | 589.75 | -1.71 | 4    | 11   | 8.55   | -0.52  | -1.11 | 0.27 | 0.21  |       |      |        |
| MOL002211                             | 11,14-eicosadienoic acid                       | 308.56 | 7.3   | 1    | 2    | 39.99  | 1.22   | 0.76  | 0.2  | 0.23  | 5.6   |      |        |
| MOL002383                             | 13-Deoxo-13 alpha-acetyloxy-1-deoxynortaxine I | 583.79 | 3     | 4    | 9    | 25.68  | -0.42  | -1.01 | 0.79 | 0.28  |       |      |        |
| MOL002384                             | 14-Deoxy-11,12-didehydroandrographolide        | 332.48 | 2.1   | 2    | 4    | 13.6   | 0.09   | -0.68 | 0.32 | 0.29  |       |      |        |
| MOL002385                             | Delcorine                                      | 479.68 | -0.94 | 1    | 8    | 7.52   | 0.4    | 0.42  | 0.36 | 0.09  |       |      |        |
| MOL002386                             | Delphamine                                     | 453.64 | -1.97 | 4    | 8    | 13.74  | -0.04  | -0.25 | 0.66 | 0.1   |       |      |        |
| MOL002387                             | Delphin                                        | 627.58 | -2.32 | 12   | 17   | 2.61   | -3.16  | -4.36 | 0.67 | 0.26  |       |      |        |
| MOL002388                             | Delphin_qt                                     | 303.26 | 1.67  | 6    | 7    | 57.76  | 0.12   | -0.66 | 0.28 | 0.35  | 1.43  |      |        |
| MOL002389                             | Delsemine B                                    | 699.93 | -0.72 | 5    | 13   | 18.32  | -0.61  | -1.07 | 0.18 | 0.22  |       |      |        |
| MOL002390                             | Delsoline                                      | 467.67 | -1.56 | 3    | 8    | 17.23  | 0.03   | -0.43 | 0.63 | 0.1   |       |      |        |
| MOL002391                             | Deltamine                                      | 465.65 | -1.11 | 2    | 8    | 9.62   | 0.3    | 0.13  | 0.37 | 0.12  |       |      |        |
| MOL002392                             | Deltoin                                        | 328.39 | 2.48  | 0    | 5    | 46.69  | 0.55   | -0.12 | 0.37 | 0.32  | 7.7   |      |        |
| MOL002393                             | DemethyldeLavaine A                            | 700.91 | -0.12 | 4    | 13   | 34.52  | -0.69  | -1.19 | 0.18 | 0.23  | 26.05 |      |        |
| MOL002394                             | DemethyldeLavaine B                            | 700.91 | -0.12 | 4    | 13   | 34.52  | -0.7   | -1.01 | 0.18 | 0.22  | 26.75 |      |        |
| MOL002395                             | Deoxyandrographolide                           | 334.5  | 3.02  | 2    | 4    | 56.3   | 0.18   | -0.49 | 0.31 | 0.27  | 2.79  |      |        |
| MOL002396                             | 14-acetyltalatisamine                          | 463.68 | 0.06  | 1    | 7    | 13.64  | 0.15   | -0.11 | 0.63 | 0.15  |       |      |        |
| MOL002397                             | karakoline                                     | 377.58 | -0.05 | 3    | 5    | 51.73  | 0.32   | -0.03 | 0.73 | 0.15  | 11.1  |      |        |
| MOL002398                             | Karanjin                                       | 292.3  | 2.94  | 0    | 4    | 69.56  | 1.22   | 0.62  | 0.34 | 0.26  | 13.15 |      |        |
| MOL002399                             | TMPEA                                          | 211.29 | 1.21  | 2    | 4    | 47.54  | 0.64   | 0     | 0.06 | 0.15  | 3.52  |      |        |
| MOL002400                             | Neojiangyouaconitine                           | 601.81 | 0.28  | 2    | 10   | 9.83   | 0.01   | -0.42 | 0.26 | 0.19  |       |      |        |
| MOL002401                             | Neokadsuranic acid B                           | 452.74 | 7.05  | 1    | 3    | 43.1   | 0.69   | -0.01 | 0.85 | 0.29  | 12.05 |      |        |
| MOL002402                             | Senbusine A                                    | 423.61 | -1.67 | 4    | 7    | 22.26  | -0.18  | -0.52 | 0.71 | 0.13  |       |      |        |
| MOL002403                             | Senbusine B                                    | 423.61 | -1.3  | 4    | 7    | 14.54  | -0.5   | -0.82 | 0.71 | 0.14  |       |      |        |
| MOL002404                             | Senbusine C                                    | 453.64 | -1.83 | 4    | 8    | 19.29  | -0.26  | -0.43 | 0.66 | 0.14  |       |      |        |
| MOL002405                             | Tamarixinol                                    | 446.84 | 12.07 | 1    | 2    | 12.18  | 1.54   | 1.07  | 0.59 | 0.2   |       |      |        |
| MOL002406                             | 2,7-Dideacetyl-2,7-dibenzoyl-taxayunnanine F   | 776.9  | 3.12  | 1    | 14   | 39.43  | -0.75  | -1.3  | 0.38 | 0.38  | 10.95 |      |        |
| MOL002407                             | beiwutine                                      | 647.79 | -2.3  | 4    | 13   | 14.88  | -0.92  | -1.31 | 0.24 | 0.21  |       |      |        |
| MOL002408                             | benzoylaconine                                 | 603.78 | -1.36 | 4    | 11   | 12.83  | -0.48  | -1.12 | 0.25 | 0.21  |       |      |        |
| MOL002409                             | benzoylhypaconine                              | 573.75 | -0.48 | 3    | 10   | 8.7    | -0.29  | -0.74 | 0.29 | 0.24  |       |      |        |
| MOL002410                             | benzoylnapelline                               | 463.67 | 3.12  | 2    | 5    | 34.06  | 0.19   | -0.38 | 0.53 | 0.31  | 15.72 |      |        |
| MOL002411                             | chasmaconitine                                 | 613.82 | 0.82  | 1    | 10   | 8.65   | 0.39   | -0.1  | 0.26 | 0.2   |       |      |        |

|           |                                                                                                                                                                                                                                                                |        |       |   |    |       |       |       |      |      |       |      |
|-----------|----------------------------------------------------------------------------------------------------------------------------------------------------------------------------------------------------------------------------------------------------------------|--------|-------|---|----|-------|-------|-------|------|------|-------|------|
| MOL002412 | chasmanine                                                                                                                                                                                                                                                     | 451.67 | -0.85 | 2 | 7  | 15.77 | 0.45  | 0.26  | 0.67 | 0.08 |       | FuZi |
| MOL002413 | coryneine                                                                                                                                                                                                                                                      | 196.3  | 0.34  | 2 | 2  | 3.55  | 1.14  | 1.12  | 0.05 | 0.22 |       |      |
| MOL002414 | denudatine                                                                                                                                                                                                                                                     | 343.56 | 2.25  | 2 | 3  | 16.55 | 0.87  | 0.57  | 0.67 | 0.24 |       |      |
| MOL002415 | 6-Demethyl-desoline                                                                                                                                                                                                                                            | 453.64 | -1.97 | 4 | 8  | 51.87 | -0.26 | -0.57 | 0.66 | 0.12 | 13.14 |      |
| MOL002416 | deoxyaconitine                                                                                                                                                                                                                                                 | 629.82 | 0.25  | 2 | 11 | 30.96 | -0.23 | -0.61 | 0.24 | 0.19 | 22.64 |      |
| MOL002417 | fuzitine                                                                                                                                                                                                                                                       | 342.45 | 3.12  | 2 | 4  | 25.79 | 1.02  | 0.69  | 0.54 | 0.17 |       |      |
| MOL002418 | hetisine                                                                                                                                                                                                                                                       | 329.48 | -0.41 | 3 | 4  | 29.12 | -0.56 | -1.09 | 0.59 | 0.22 |       |      |
| MOL002419 | (R)-Norcoclaurine                                                                                                                                                                                                                                              | 271.34 | 2.57  | 4 | 4  | 82.54 | 0.63  | 0.03  | 0.21 | 0.34 | 3.85  |      |
| MOL002420 | hokbusine A                                                                                                                                                                                                                                                    | 603.78 | -1.3  | 3 | 11 | 21.74 | -0.5  | -1.05 | 0.26 | 0.22 |       |      |
| MOL002421 | ignavine                                                                                                                                                                                                                                                       | 449.59 | 1.22  | 3 | 6  | 84.08 | -0.07 | -0.49 | 0.25 | 0.32 | 28.93 |      |
| MOL002422 | isotalatizidine                                                                                                                                                                                                                                                | 407.61 | -0.73 | 3 | 6  | 50.82 | -0.11 | -0.62 | 0.73 | 0.14 | 11.59 |      |
| MOL002423 | jesaconitine                                                                                                                                                                                                                                                   | 675.85 | -0.99 | 3 | 13 | 33.41 | -0.44 | -1.16 | 0.19 | 0.19 | 26.06 |      |
| MOL002424 | Aconitine                                                                                                                                                                                                                                                      | 645.82 | -0.98 | 3 | 12 | 7.87  | -0.58 | -1.13 | 0.23 | 0.22 |       |      |
| MOL002425 | Zoba EG                                                                                                                                                                                                                                                        | 109.14 | 0.82  | 3 | 2  | 66.14 | 0.56  | 0.31  | 0.02 | 0.39 | 12.01 |      |
| MOL002426 | neoline                                                                                                                                                                                                                                                        | 437.64 | -1.26 | 3 | 7  | 13.32 | 0.14  | -0.14 | 0.69 | 0.13 |       |      |
| MOL002427 | Zoba 3GA                                                                                                                                                                                                                                                       | 109.14 | 0.82  | 3 | 2  | 65.8  | 0.69  | 0.73  | 0.02 | 0.37 | 11.99 |      |
| MOL002428 | UNAL                                                                                                                                                                                                                                                           | 109.14 | 0.82  | 3 | 2  | 67.62 | 0.51  | 0.2   | 0.02 | 0.39 | 11.94 |      |
| MOL002429 | Pyrrolezanthine                                                                                                                                                                                                                                                | 245.3  | 2.51  | 2 | 3  | 11.99 | 0.42  | -0.03 | 0.12 | 0.26 |       |      |
| MOL002430 | Salsolinol                                                                                                                                                                                                                                                     | 179.24 | 1.29  | 3 | 3  | 36.83 | 0.81  | 0.67  | 0.06 | 0.29 | 1.87  |      |
| MOL002431 | songorine                                                                                                                                                                                                                                                      | 357.54 | 0.9   | 2 | 4  | 24.46 | 0.03  | -0.27 | 0.72 | 0.26 |       |      |
| MOL002432 | talatizamine                                                                                                                                                                                                                                                   | 421.64 | -0.32 | 2 | 6  | 16.94 | 0.51  | 0.15  | 0.72 | 0.1  |       |      |
|           | (3R,8S,9R,10R,13R,14S,17R)-3-hydroxy-4,4,9,13,14-pentamethyl-17-[(E,2R)-6-methyl-7-[(2R,3R,4S,5S,6R)-3,4,5-trihydroxy-6-[(2R,3R,4S,5S,6R)-3,4,5-trihydroxy-6-(hydroxymethyl)oxan-2-yl]oxymethyl]oxan-2-yl]oxyhept-5-en-2-yl]-1,2,3,7,8,10,12,15,16,17-decahydr |        |       |   |    |       |       |       |      |      |       |      |
| MOL002433 | [(2R,3R,4S,5S,6R)-3,4,5-trihydroxy-6-(hydroxymethyl)oxan-2-yl]oxymethyl]oxan-2-yl]oxyhept-5-en-2-yl]-1,2,3,7,8,10,12,15,16,17-decahydr                                                                                                                         | 781.1  | 2.2   | 8 | 13 | 41.52 | -2.31 | -3.18 | 0.22 | 0.25 | 10.51 |      |
| MOL002434 | Carnosifloside I <sub>qt</sub>                                                                                                                                                                                                                                 | 456.78 | 5.69  | 2 | 3  | 38.16 | 0.28  | -0.77 | 0.8  | 0.25 | 7     |      |
| MOL002435 | STOCK1N-53073                                                                                                                                                                                                                                                  | 499.67 | -3.4  | 5 | 10 | 8     | -0.45 | -0.9  | 0.58 | 0.12 |       |      |
| MOL002436 | Delavaconitine                                                                                                                                                                                                                                                 | 497.69 | 1.38  | 2 | 7  | 9.91  | 0.3   | -0.06 | 0.37 | 0.26 |       |      |
| MOL002437 | Delbruline                                                                                                                                                                                                                                                     | 479.68 | -0.94 | 1 | 8  | 13.6  | 0.3   | 0     | 0.36 | 0.11 |       |      |
| MOL002438 | Delbrusine                                                                                                                                                                                                                                                     | 493.71 | -0.54 | 0 | 8  | 7.51  | 0.68  | 0.44  | 0.33 | 0.09 |       |      |
| MOL000359 | sitosterol                                                                                                                                                                                                                                                     | 414.79 | 8.08  | 1 | 1  | 36.91 | 1.32  | 0.87  | 0.75 | 0.22 | 5.37  |      |
| MOL000538 | hypaconitine                                                                                                                                                                                                                                                   | 615.79 | -0.1  | 2 | 11 | 31.39 | -0.34 | -0.78 | 0.26 | 0.21 | 19.87 |      |

|           |                                                                                         |        |      |   |   |       |      |      |      |      |       |
|-----------|-----------------------------------------------------------------------------------------|--------|------|---|---|-------|------|------|------|------|-------|
| MOL001055 | 5-isopropyl-2-methylbicyclo[3.1.0]hex-2-ene                                             | 136.26 | 2.87 | 0 | 0 | 47.19 | 1.82 | 2.18 | 0.04 | 0.29 | 11.44 |
| MOL001121 | 19894-97-4                                                                              | 152.26 | 1.78 | 1 | 1 | 49.98 | 1.25 | 1.5  | 0.06 | 0.21 | 11.55 |
| MOL000117 | Cymol                                                                                   | 134.24 | 3.51 | 0 | 0 | 27.2  | 1.86 | 2.1  | 0.02 | 0.34 |       |
| MOL000118 | (L)-alpha-Terpineol                                                                     | 154.28 | 2.42 | 1 | 1 | 48.8  | 1.39 | 1.72 | 0.03 | 0.27 | 11.35 |
| MOL000119 | ZINC02040970<br>(1R,5R,7S)-4,7-dimethyl-7-(4-methylpent-3-enyl)bicyclo[3.1.1]hept-3-ene | 222.41 | 4.56 | 1 | 1 | 40.43 | 1.44 | 1.31 | 0.06 | 0.3  | 4.73  |
| MOL001201 | Decanal                                                                                 | 204.39 | 4.7  | 0 | 0 | 16.23 | 1.86 | 1.96 | 0.09 | 0.27 |       |
| MOL000121 | (4S)-4-isopropylcyclohexene-1-carbaldehyde                                              | 156.3  | 3.68 | 0 | 1 | 29.81 | 1.34 | 1.44 | 0.02 | 0.2  |       |
| MOL001210 | 1,8-cineole                                                                             | 152.26 | 2.86 | 0 | 1 | 40.36 | 1.36 | 1.69 | 0.03 | 0.28 | 1.98  |
| MOL000122 | geraniol                                                                                | 154.28 | 2.15 | 0 | 1 | 39.73 | 1.57 | 2.06 | 0.05 | 0.24 | 11.29 |
| MOL000123 | citral                                                                                  | 154.28 | 2.93 | 1 | 1 | 23.93 | 1.19 | 1.14 | 0.02 | 0.27 |       |
| MOL000124 | (-)-alpha-Pinene                                                                        | 152.26 | 3.19 | 0 | 1 | 22.52 | 1.33 | 1.43 | 0.02 | 0.33 |       |
| MOL000125 | (-)-nopinene                                                                            | 136.26 | 2.87 | 0 | 0 | 46.25 | 1.85 | 2.3  | 0.05 | 0.25 | 11.42 |
| MOL000126 | Neral                                                                                   | 136.26 | 2.93 | 0 | 0 | 44.84 | 1.8  | 2.12 | 0.05 | 0.27 | 11.32 |
| MOL000127 | NERYLACETATE                                                                            | 152.26 | 3.19 | 0 | 1 | 19.48 | 1.36 | 1.51 | 0.02 | 0.34 |       |
| MOL000128 | EIC                                                                                     | 196.32 | 3.31 | 0 | 2 | 25.94 | 1.28 | 1.28 | 0.04 | 0.27 |       |
| MOL000131 | Oktadekan                                                                               | 280.5  | 6.39 | 1 | 2 | 41.9  | 1.16 | 0.9  | 0.14 | 0.25 | 7.5   |
| MOL001394 | PENTADECYLIC ACID                                                                       | 254.56 | 8.58 | 0 | 0 | 9.81  | 1.83 | 1.83 | 0.09 | 0.14 |       |
| MOL001396 | copaene                                                                                 | 242.45 | 5.91 | 1 | 2 | 20.18 | 1.08 | 0.88 | 0.08 | 0.18 |       |
| MOL001600 | UPL                                                                                     | 204.39 | 4.17 | 0 | 0 | 29.47 | 1.81 | 2.04 | 0.12 | 0.22 |       |
| MOL001619 | guaiene                                                                                 | 268.59 | 9.04 | 0 | 0 | 8.52  | 1.83 | 1.7  | 0.11 | 0.16 |       |
| MOL000170 | 2-[(2S,5R)-5-ethenyl-5-methyloxolan-2-yl]propan-2-ol                                    | 204.39 | 5.13 | 0 | 0 | 28.21 | 1.83 | 2.03 | 0.07 | 0.23 |       |
| MOL001719 | (+/-)-Isoborneol                                                                        | 170.28 | 1.43 | 1 | 2 | 68.08 | 0.99 | 1.14 | 0.04 | 0.31 | 11    |
| MOL000018 | ZINC02169908                                                                            | 154.28 | 1.98 | 1 | 1 | 86.98 | 1.27 | 1.6  | 0.05 | 0    | 11.36 |
| MOL001899 | D-Camphene                                                                              | 268.54 | 6.2  | 0 | 1 | 23.3  | 1.42 | 1.24 | 0.1  | 0.23 |       |
| MOL000019 | L-Bornyl acetate                                                                        | 136.26 | 2.93 | 0 | 0 | 34.98 | 1.81 | 2.19 | 0.04 | 0    | 11.29 |
| MOL000196 | Myrcene                                                                                 | 196.32 | 2.35 | 0 | 2 | 65.52 | 1.29 | 1.59 | 0.08 | 0.23 | 6.94  |
| MOL000197 | (R)-linalool                                                                            | 136.26 | 3.69 | 0 | 0 | 24.96 | 1.84 | 1.98 | 0.02 | 0.37 |       |
| MOL000198 | (S)-(+)-alpha-Phellandrene                                                              | 154.28 | 2.74 | 1 | 1 | 39.8  | 1.33 | 1.36 | 0.02 | 0.32 | 6.48  |
| MOL000200 | p-Ocimene                                                                               | 136.26 | 3.25 | 0 | 0 | 27.9  | 1.87 | 2.2  | 0.02 | 0.29 |       |
| MOL000201 | Moslene                                                                                 | 136.26 | 3.63 | 0 | 0 | 15.06 | 1.85 | 1.99 | 0.02 | 0.39 |       |
| MOL000202 | (+)-beta-Phellandrene                                                                   | 136.26 | 3.45 | 0 | 0 | 33.02 | 1.88 | 2.05 | 0.02 | 0.27 | 11.08 |
| MOL002028 |                                                                                         | 136.26 | 3.31 | 0 | 0 | 40.3  | 1.83 | 2.2  | 0.02 | 0.3  | 11.28 |

|           |                                                                                                                                       |        |      |   |    |       |       |       |      |      |       |
|-----------|---------------------------------------------------------------------------------------------------------------------------------------|--------|------|---|----|-------|-------|-------|------|------|-------|
| MOL000204 | -cis-.beta.-Elemene<br>diastereomer                                                                                                   | 204.39 | 4.79 | 0 | 0  | 28.62 | 1.85  | 2.09  | 0.06 | 0.33 |       |
| MOL002085 | alpha-Cubebene                                                                                                                        | 204.39 | 4.17 | 0 | 0  | 16.73 | 1.83  | 2.1   | 0.11 | 0.25 |       |
| MOL002175 | 3-cyclohexen-1-ol                                                                                                                     | 98.16  | 1.06 | 1 | 1  | 70.57 | 1.14  | 1.52  | 0.01 | 0.25 | 11.25 |
| MOL000023 | Hemo-sol                                                                                                                              | 136.26 | 3.5  | 0 | 0  | 39.84 | 1.83  | 2.12  | 0.02 | 0    | 11.68 |
| MOL002361 | Terragon                                                                                                                              | 148.22 | 2.82 | 0 | 1  | 36.59 | 1.72  | 1.83  | 0.03 | 0.34 | 1.79  |
| MOL000244 | (-)-Borneol                                                                                                                           | 154.28 | 1.98 | 1 | 1  | 81.8  | 1.22  | 1.47  | 0.05 | 0.24 | 11.36 |
| MOL002450 | (+)-1,5-Epoxy-nor-<br>ketoguaia-11-ene                                                                                                | 220.34 | 2.46 | 0 | 2  | 62.84 | 1.05  | 1.05  | 0.12 | 0.31 | 6.4   |
| MOL002451 | 尾-humulene                                                                                                                            | 190.36 | 4.63 | 0 | 0  | 40.36 | 1.83  | 2     | 0.05 | 0.3  | 2.42  |
| MOL002452 | 尾-sesquiphellandrene                                                                                                                  | 204.39 | 5.14 | 0 | 0  | 16.2  | 1.88  | 2.07  | 0.06 | 0.31 |       |
| MOL002453 | (-)-Comphene                                                                                                                          | 136.26 | 2.93 | 0 | 0  | 34.98 | 1.81  | 2.21  | 0.04 | 0.28 | 11.29 |
| MOL002454 | 10-Gingerdione                                                                                                                        | 348.53 | 5.68 | 2 | 4  | 21.42 | 0.69  | 0.11  | 0.29 | 0.24 |       |
| MOL002455 | [(3S)-3,7-dimethyloct-6-<br>enyl] acetate                                                                                             | 198.34 | 3.43 | 0 | 2  | 22.68 | 1.31  | 1.38  | 0.04 | 0.24 |       |
| MOL002456 | [(3R)-3,7-dimethyloct-6-<br>enyl] butanoate                                                                                           | 226.4  | 4.55 | 0 | 2  | 21.03 | 1.33  | 1.31  | 0.06 | 0.25 |       |
| MOL002457 | Cyclopropyl ketone                                                                                                                    | 110.17 | 1.27 | 0 | 1  | 62.18 | 1.25  | 1.62  | 0.02 | 0.37 | 11.55 |
| MOL002458 | ZINC01850974                                                                                                                          | 154.28 | 2.11 | 1 | 1  | 78.86 | 1.31  | 1.6   | 0.05 | 0.23 | 11.19 |
| MOL002459 | (S)-5-Hydroxy-1-(4-<br>hydroxy-3-methoxyphenyl)-<br>3-tetradecanone                                                                   | 350.55 | 5.3  | 2 | 4  | 19.14 | 0.48  | 0.04  | 0.28 | 0.23 |       |
| MOL002460 | 12,13-Di-acetoxyl-1,4,6,11-<br>eudesmanetetol                                                                                         | 388.51 | 0.15 | 4 | 8  | 17.51 | -0.54 | -1.11 | 0.34 | 0.22 |       |
| MOL002461 | Gingerglycolipid A                                                                                                                    | 676.89 | 2.8  | 8 | 14 | 13.62 | -1.71 | -2.44 | 0.47 | 0.25 |       |
| MOL002462 | gingerglycolipid A_qt<br>[(2S)-2-hydroxy-3-<br>[(2R,3R,4S,5R,6R)-3,4,5-<br>trihydroxy-6-<br>[(2S,3R,4S,5R,6R)-3,4,5-<br>trihydroxy-6- | 514.73 | 4.54 | 5 | 9  | 11.71 | -0.36 | -1.13 | 0.64 | 0.27 |       |
| MOL002463 | (hydroxymethyl)tetrahydrop<br>yran-2-<br>yl]oxymethyl]tetrahydropyr<br>an-2-yl]oxy-propyl]<br>(9Z,12Z)-octadeca-9,12-<br>dienoate     | 678.91 | 2.1  | 8 | 14 | 22.78 | -2.11 | -3.11 | 0.4  | 0.23 |       |
| MOL002464 | 1-Monolinolein                                                                                                                        | 354.59 | 5.59 | 2 | 4  | 37.18 | 0.32  | -0.32 | 0.3  | 0.23 | 4.36  |

|                                                |                                                                                                           |        |      |   |    |       |       |       |      |      |       |
|------------------------------------------------|-----------------------------------------------------------------------------------------------------------|--------|------|---|----|-------|-------|-------|------|------|-------|
| 9-Octadecenoic acid (Z)-, 3-<br>((6-O-alpha-D- |                                                                                                           |        |      |   |    |       |       |       |      |      |       |
| MOL002465                                      | galactopyranosyl-beta-D-galactopyranosyl)oxy)-2-hydroxypropyl ester, (S)-gingerglycolipid C <sub>qt</sub> | 680.93 | 3.69 | 8 | 14 | 10.02 | -1.45 | -1.99 | 0.48 | 0.21 |       |
| MOL002466                                      | 6-gingerol                                                                                                | 518.77 | 5.43 | 5 | 9  | 9.93  | -0.41 | -0.87 | 0.62 | 0.21 |       |
| MOL002467                                      | hexahydrocurcumin                                                                                         | 294.43 | 3.47 | 2 | 4  | 35.64 | 0.54  | -0.08 | 0.16 | 0.23 | 3.05  |
| MOL002468                                      | 12-Gingerol                                                                                               | 374.47 | 3.31 | 3 | 6  | 4.88  | 0.36  | -0.5  | 0.41 | 0.26 |       |
| MOL002469                                      | (Z,Z)-farnesol                                                                                            | 378.61 | 6.21 | 2 | 4  | 17.81 | 0.53  | -0.27 | 0.37 | 0.24 |       |
| MOL000247                                      | Isogingerenone-B                                                                                          | 222.41 | 4.76 | 1 | 1  | 41.14 | 1.25  | 1.15  | 0.06 | 0.28 | 6.29  |
| MOL002470                                      | [(1R,2R,5R)-2-isopropyl-5-methyl-cyclohexyl] acetate                                                      | 386.48 | 4.37 | 2 | 6  | 3.8   | 0.79  | 0.05  | 0.46 | 0.23 |       |
| MOL002471                                      | Neryl propionate                                                                                          | 198.34 | 3.16 | 0 | 2  | 22.19 | 1.29  | 1.57  | 0.05 | 0.22 |       |
| MOL002472                                      | ZINC04081584                                                                                              | 210.35 | 3.98 | 0 | 2  | 36.64 | 1.32  | 1.28  | 0.05 | 0.29 | 4.51  |
| MOL002473                                      | p-mentha-1,5-dien-8-ol                                                                                    | 302.5  | 3.34 | 1 | 2  | 13.09 | 0.75  | 0.37  | 0.39 | 0.26 |       |
| MOL002474                                      | himachalene                                                                                               | 152.26 | 1.97 | 1 | 1  | 28.63 | 1.29  | 1.5   | 0.03 | 0.3  |       |
| MOL002475                                      | 2,6-Nonamethylene                                                                                         | 204.39 | 4.89 | 0 | 0  | 17.59 | 1.87  | 2.11  | 0.08 | 0.24 |       |
| MOL002476                                      | (2R)-2,6-dimethylhept-5-enal                                                                              | 203.36 | 4.49 | 0 | 1  | 68.94 | 1.74  | 1.98  | 0.09 | 0.24 | 9.46  |
| MOL002477                                      | (2R)-heptan-2-ol                                                                                          | 140.25 | 2.77 | 0 | 1  | 28.86 | 1.37  | 1.61  | 0.02 | 0.29 |       |
| MOL002478                                      | (2S)-2-methylpentanal                                                                                     | 116.23 | 2.26 | 1 | 1  | 24.38 | 1.13  | 1.25  | 0.01 | 0.22 |       |
| MOL002479                                      | Methylbutenol                                                                                             | 100.18 | 1.86 | 0 | 1  | 63.34 | 1.27  | 1.65  | 0.01 | 0.27 | 11.26 |
| MOL002480                                      | 2-Methylhept-2-ene                                                                                        | 86.15  | 0.84 | 1 | 1  | 54.58 | 1.12  | 1.32  | 0.01 | 0.33 | 11.47 |
| MOL002481                                      | ()-beta-Citronellene                                                                                      | 112.24 | 3.57 | 0 | 0  | 25.56 | 1.81  | 2.07  | 0.01 | 0.26 |       |
| MOL002482                                      | 1-(4-Hydroxy-3-methoxyphenyl)decan-5-one                                                                  | 138.28 | 3.88 | 0 | 0  | 23.21 | 1.83  | 2.1   | 0.01 | 0.3  |       |
| MOL002483                                      | Isovaleral                                                                                                | 278.43 | 4.58 | 1 | 3  | 7.55  | 0.93  | 0.45  | 0.14 | 0.24 |       |
| MOL002484                                      | 4-(1,5-Dimethylhex-4-enyl)cyclohex-2-enone                                                                | 86.15  | 1.19 | 0 | 1  | 44.71 | 1.2   | 1.6   | 0    | 0.27 | 11.36 |
| MOL002485                                      | 4-Gingerol                                                                                                | 206.36 | 3.94 | 0 | 1  | 45.5  | 1.46  | 1.43  | 0.06 | 0.29 | 4.12  |
| MOL002486                                      | 5-hydroxy-7-(4-hydroxyphenyl)-1-(4-hydroxy-3-methoxyphenyl)-3-heptanone                                   | 266.37 | 2.56 | 2 | 4  | 8.62  | 0.45  | -0.14 | 0.12 | 0.25 |       |
| MOL002487                                      | 6-Gingerdione                                                                                             | 344.44 | 3.33 | 3 | 5  | 5.34  | 0.3   | -0.81 | 0.32 | 0.3  |       |
| MOL002488                                      | [(3S)-3,7-dimethyloct-7-enyl] acetate                                                                     | 292.41 | 3.85 | 2 | 4  | 8.87  | 0.75  | 0.22  | 0.16 | 0.27 |       |
| MOL002489                                      | 6-gingediol-3-acetate                                                                                     | 198.34 | 3.48 | 0 | 2  | 31.38 | 1.29  | 1.25  | 0.04 | 0.25 | 5.76  |
| MOL002490                                      | 6-gingediol-5-acetate                                                                                     | 380.53 | 4.3  | 1 | 6  | 6.71  | 0.55  | -0.3  | 0.29 | 0.25 |       |
| MOL002491                                      | 6-gingediol                                                                                               | 338.49 | 3.92 | 2 | 5  | 7.11  | 0.45  | -0.32 | 0.22 | 0.23 |       |
| MOL002492                                      |                                                                                                           | 338.49 | 3.92 | 2 | 5  | 7.06  | 0.41  | -0.4  | 0.23 | 0.24 |       |
| MOL002493                                      |                                                                                                           | 296.45 | 3.54 | 3 | 4  | 6.02  | 0.22  | -0.58 | 0.16 | 0.25 |       |

GanJiang

|           |                                                                                                                                                        |         |       |    |    |        |       |       |      |      |       |
|-----------|--------------------------------------------------------------------------------------------------------------------------------------------------------|---------|-------|----|----|--------|-------|-------|------|------|-------|
| MOL002494 | 6-gingesulfonic acid                                                                                                                                   | 358.5   | 3.05  | 2  | 6  | 8.56   | 0.11  | -0.18 | 0.23 | 0.33 |       |
| MOL002495 | 6-shogaol                                                                                                                                              | 276.41  | 4.55  | 1  | 3  | 31     | 1.07  | 0.49  | 0.14 | 0.25 | 4.07  |
| MOL002496 | Sulcatone                                                                                                                                              | 126.22  | 1.79  | 0  | 1  | 26.36  | 1.35  | 1.52  | 0.01 | 0.31 |       |
| MOL002497 | (8)-Gingerol                                                                                                                                           | 322.49  | 4.39  | 2  | 4  | 7.01   | 0.56  | -0.09 | 0.22 | 0.24 |       |
| MOL002498 | PGR                                                                                                                                                    | 76.11   | -0.52 | 2  | 2  | 46.54  | -0.14 | -1.41 | 0    | 0.23 | 11.48 |
| MOL002499 | Bicyclo[3. 1. 0]hex-2-ene,4-methyl-1-(1-methylethyl)-                                                                                                  | 136.26  | 2.68  | 0  | 0  | 50.91  | 1.84  | 2.21  | 0.04 | 0.27 | 11.16 |
| MOL002500 | Campherenol                                                                                                                                            | 222.41  | 3.8   | 1  | 1  | 18.25  | 1.35  | 1.32  | 0.09 | 0.26 |       |
| MOL002501 | [(1S)-3-[(E)-but-2-enyl]-2-methyl-4-oxo-1-cyclopent-2-enyl] (1R,3R)-3-[(E)-3-methoxy-2-methyl-3-oxoprop-1-enyl]-2,2-dimethylcyclopropane-1-carboxylate | 360.49  | 3.68  | 0  | 5  | 62.52  | 0.37  | -0.36 | 0.31 | 0.29 | 3.21  |
| MOL002502 | copaene                                                                                                                                                | 204.39  | 4.17  | 0  | 0  | 24.08  | 1.81  | 2.06  | 0.12 | 0.23 |       |
| MOL002503 | Cynanuricoside A                                                                                                                                       | 1085.43 | 1.15  | 7  | 21 | 14.92  | -2.35 | -3.33 | 0.03 | 0.2  |       |
| MOL002504 | Peruvicol                                                                                                                                              | 222.41  | 4.56  | 1  | 1  | 29.61  | 1.47  | 1.44  | 0.06 | 0.29 |       |
| MOL002505 | C10230                                                                                                                                                 | 952.68  | 1.04  | 14 | 27 | 3.01   | -3.56 | -4.13 | 0.02 | 0.4  |       |
| MOL002506 | Gingerenone A                                                                                                                                          | 356.45  | 4.39  | 2  | 5  | 4.2    | 0.71  | -0.37 | 0.38 | 0.3  |       |
| MOL002507 | Gingerenone B                                                                                                                                          | 386.48  | 4.37  | 2  | 6  | 3.79   | 0.77  | -0.29 | 0.46 | 0.24 |       |
| MOL002508 | Gingerenone-C                                                                                                                                          | 326.42  | 4.41  | 2  | 4  | 4.39   | 0.82  | -0.08 | 0.3  | 0.34 |       |
| MOL002509 | Ginkgetin                                                                                                                                              | 566.54  | 4.86  | 4  | 10 | 22.19  | 0.12  | -1.48 | 0.59 | 0.34 |       |
| MOL002510 | Heptaphylline                                                                                                                                          | 279.36  | 4.67  | 2  | 2  | 14.81  | 1.24  | 0.6   | 0.25 | 0.32 |       |
| MOL002511 | Isoginkgetin                                                                                                                                           | 566.54  | 4.86  | 4  | 10 | 21.56  | 0.02  | -1.69 | 0.58 | 0.33 |       |
| MOL002512 | Mesotrihydroxypiperidine                                                                                                                               | 133.17  | -1.93 | 4  | 4  | 50.1   | -0.66 | -1.46 | 0.02 | 0.21 | 10.65 |
| MOL002513 | Xanthorrhizol                                                                                                                                          | 218.37  | 5.07  | 1  | 1  | 32.1   | 1.72  | 1.64  | 0.07 | 0.32 | 3.5   |
| MOL002514 | Sexangularetin                                                                                                                                         | 316.28  | 1.76  | 4  | 7  | 62.86  | 0.31  | -0.5  | 0.3  | 0.32 | 15.19 |
| MOL002515 | Shyobunone                                                                                                                                             | 220.39  | 3.84  | 0  | 1  | 44.28  | 1.34  | 1.58  | 0.07 | 0.35 | 8.84  |
| MOL002516 | zingerone                                                                                                                                              | 194.25  | 1.63  | 1  | 3  | 25.23  | 0.87  | 0.48  | 0.05 | 0.29 |       |
| MOL002517 | Zingiberoside A3                                                                                                                                       | 885.17  | 0.28  | 9  | 17 | 27.64  | -2.15 | -3.09 | 0.06 | 0.23 |       |
| MOL002518 | Zingiberoside A3_qt                                                                                                                                    | 414.69  | 4.63  | 1  | 3  | 14.15  | 0.7   | 0.03  | 0.81 | 0.21 |       |
| MOL002519 | Decamethylenediol                                                                                                                                      | 174.32  | 2.48  | 2  | 2  | 26.51  | 0.3   | -0.51 | 0.03 | 0.16 |       |
| MOL002520 | .beta.-Fenchyl acetate, exo-                                                                                                                           | 196.32  | 2.49  | 0  | 2  | 108.68 | 1.27  | 1.62  | 0.07 | 0.22 | -2.37 |
| MOL002521 | beta-Curcumene                                                                                                                                         | 204.39  | 5.33  | 0  | 0  | 4.48   | 1.92  | 2.07  | 0.06 | 0.3  |       |
| MOL002522 | beta-Rhodinol                                                                                                                                          | 156.3   | 3.05  | 1  | 1  | 38.05  | 1.19  | 1.12  | 0.02 | 0.24 | 5.19  |
| MOL000264 | Tereben                                                                                                                                                | 136.26  | 3.64  | 0  | 0  | 29.62  | 1.86  | 2.11  | 0.02 | 0.28 |       |
| MOL000267 | beta-Citronellol                                                                                                                                       | 156.3   | 3.05  | 1  | 1  | 38.89  | 1.2   | 1.14  | 0.02 | 0.24 | 5.21  |
| MOL000268 | (1S,5S)-1-isopropyl-4-methylenebicyclo[3.1.0]hexane                                                                                                    | 136.26  | 2.93  | 0  | 0  | 46.21  | 1.83  | 2.18  | 0.04 | 0.31 | 11.47 |
| MOL000027 | alpha-Curcumene                                                                                                                                        | 202.37  | 5.34  | 0  | 0  | 4.68   | 1.93  | 1.99  | 0.06 | 0    |       |

|           |                                                                                      |        |      |   |   |       |       |       |      |      |       |
|-----------|--------------------------------------------------------------------------------------|--------|------|---|---|-------|-------|-------|------|------|-------|
| MOL000032 | beta-Eudesmol                                                                        | 222.41 | 3.72 | 1 | 1 | 26.09 | 1.32  | 1.38  | 0.1  | 0    |       |
| MOL000034 | 2-[(1R,3S,4S)-3-isopropenyl-4-methyl-4-vinylcyclohexyl]propan-2-ol                   | 222.41 | 3.7  | 1 | 1 | 19.03 | 1.37  | 1.46  | 0.07 | 0    |       |
| MOL000357 | Sitogluside                                                                          | 576.95 | 6.34 | 4 | 6 | 20.63 | -0.14 | -0.93 | 0.62 | 0.23 |       |
| MOL000358 | beta-sitosterol                                                                      | 414.79 | 8.08 | 1 | 1 | 36.91 | 1.32  | 0.99  | 0.75 | 0.23 | 5.36  |
| MOL000359 | sitosterol                                                                           | 414.79 | 8.08 | 1 | 1 | 36.91 | 1.32  | 0.87  | 0.75 | 0.22 | 5.37  |
| MOL000479 | Farnesene                                                                            | 204.39 | 5.52 | 0 | 0 | 17.42 | 1.95  | 2.21  | 0.05 | 0    |       |
| MOL000489 | (1S,4aR,8aR)-1-isopropyl-7-methyl-4-methylene-2,3,4a,5,6,8a-hexahydro-1H-naphthalene | 204.39 | 4.8  | 0 | 0 | 19.8  | 1.86  | 2.03  | 0.08 | 0    |       |
| MOL000597 | Neryl acetate                                                                        | 196.32 | 3.31 | 0 | 2 | 57.47 | 1.25  | 1.4   | 0.04 | 0.27 | 7.92  |
| MOL000612 | (-)-alpha-cedrene                                                                    | 204.39 | 4.12 | 0 | 0 | 55.56 | 1.81  | 2.16  | 0.1  | 0.24 | 4.82  |
| MOL000666 | hexanal                                                                              | 100.18 | 1.85 | 0 | 1 | 55.71 | 1.25  | 1.52  | 0.01 | 0.23 | 10.96 |
| MOL000675 | oleic acid                                                                           | 282.52 | 6.84 | 1 | 2 | 33.13 | 1.17  | 0.78  | 0.14 | 0.2  | 4.99  |
| MOL000676 | DBP                                                                                  | 278.38 | 4.2  | 0 | 4 | 64.54 | 0.8   | 0.56  | 0.13 | 0.34 | 5.41  |
| MOL00069  | palmitic acid                                                                        | 256.48 | 6.37 | 1 | 2 | 19.3  | 1.09  | 1     | 0.1  | 0    |       |
| MOL000710 | OYA                                                                                  | 128.24 | 2.77 | 0 | 1 | 19.07 | 1.3   | 1.52  | 0.01 | 0.23 |       |
| MOL000712 | o-Cymol                                                                              | 134.24 | 3.51 | 0 | 0 | 51.89 | 1.88  | 2.07  | 0.02 | 0.37 | 11.74 |
| MOL000765 | Citraurin beta                                                                       | 432.7  | 7.1  | 1 | 2 | 20.53 | 1.07  | -0.85 | 0.56 | 0.36 |       |
| MOL000774 | (-)-Citronellal                                                                      | 154.28 | 3.02 | 0 | 1 | 35.71 | 1.34  | 1.62  | 0.02 | 0.27 | 6.57  |
| MOL000863 | Dekan                                                                                | 142.32 | 4.93 | 0 | 0 | 17.74 | 1.78  | 1.93  | 0.01 | 0.17 |       |
| MOL000867 | Heptadekan                                                                           | 240.53 | 8.13 | 0 | 0 | 8.64  | 1.84  | 1.87  | 0.07 | 0.14 |       |
| MOL000868 | LFA                                                                                  | 282.62 | 9.5  | 0 | 0 | 8.46  | 1.83  | 1.8   | 0.13 | 0.13 |       |
| MOL000869 | Henicosane                                                                           | 296.65 | 9.95 | 0 | 0 | 8.41  | 1.84  | 1.8   | 0.15 | 0.13 |       |
| MOL000879 | methyl palmitate                                                                     | 270.51 | 6.62 | 0 | 2 | 18.09 | 1.37  | 1.18  | 0.12 | 0.14 |       |
| MOL000886 | tetradecane                                                                          | 198.44 | 6.76 | 0 | 0 | 15.94 | 1.79  | 1.78  | 0.04 | 0.15 |       |
| MOL000890 | (+)-alpha-Curcumene                                                                  | 202.37 | 5.34 | 0 | 0 | 26.56 | 1.93  | 2.03  | 0.06 | 0.33 |       |
| MOL000895 | Zingiberene                                                                          | 204.39 | 5.08 | 0 | 0 | 18.8  | 1.91  | 2.01  | 0.06 | 0.3  |       |
| MOL000911 | Terpilene                                                                            | 136.26 | 3.45 | 0 | 0 | 33.95 | 1.84  | 2.1   | 0.02 | 0.27 | 11.05 |
| MOL000913 | tricyclene                                                                           | 136.26 | 2.3  | 0 | 0 | 36.11 | 1.8   | 2.22  | 0.07 | 0.25 | 11.36 |
| MOL000918 | 2-NONANONE                                                                           | 142.27 | 2.7  | 0 | 1 | 8.51  | 1.34  | 1.62  | 0.02 | 0.24 |       |
| MOL000924 | Mnk                                                                                  | 170.33 | 3.62 | 0 | 1 | 17.66 | 1.4   | 1.64  | 0.03 | 0.22 |       |
| MOL000926 | cis-beta-farnesene                                                                   | 204.39 | 5.52 | 0 | 0 | 6.75  | 1.92  | 2.15  | 0.05 | 0.34 |       |
| MOL000932 | alpha-Farnesene                                                                      | 204.39 | 5.46 | 0 | 0 | 21.7  | 1.97  | 1.89  | 0.05 | 0.32 |       |
| MOL000968 | beta-Bisabolene                                                                      | 204.39 | 5.33 | 0 | 0 | 29.59 | 1.88  | 2.13  | 0.06 | 0.29 |       |
| MOL000018 | (+/-)-Isoborneol                                                                     | 154.28 | 1.98 | 1 | 1 | 86.98 | 1.27  | 1.6   | 0.05 | 0    | 11.36 |
| MOL000019 | D-Camphene                                                                           | 136.26 | 2.93 | 0 | 0 | 34.98 | 1.81  | 2.19  | 0.04 | 0    | 11.29 |
| MOL000020 | 12-senecioid-2E,8E,10E-atractylentriol                                               | 312.39 | 2.5  | 0 | 4 | 62.4  | 0.01  | -1.37 | 0.22 | 0.12 | 6.07  |

|           |                                                                                                                                |        |      |   |   |       |       |       |      |      |       |
|-----------|--------------------------------------------------------------------------------------------------------------------------------|--------|------|---|---|-------|-------|-------|------|------|-------|
| MOL000021 | 14-acetyl-12-senecieryl-2E,8E,10E-atractylentriol                                                                              | 355.44 | 3.21 | 0 | 5 | 60.31 | 0.33  | -1.09 | 0.31 | 0.05 | 5.32  |
| MOL000022 | 14-acetyl-12-senecieryl-2E,8Z,10E-atractylentriol                                                                              | 356.45 | 3.54 | 1 | 5 | 63.37 | 0.42  | -1.14 | 0.3  | 0    | 6.43  |
| MOL000023 | Hemo-sol                                                                                                                       | 136.26 | 3.5  | 0 | 0 | 39.84 | 1.83  | 2.12  | 0.02 | 0    | 11.68 |
| MOL000024 | alpha-humulene                                                                                                                 | 204.39 | 5.04 | 0 | 0 | 22.98 | 1.88  | 2.08  | 0.06 | 0    |       |
| MOL000025 | 伪-Longipinene                                                                                                                  | 204.39 | 4.12 | 0 | 0 | 53.26 | 1.83  | 2.14  | 0.12 | 0    | 12.06 |
| MOL000026 | stigmast-22E-en-3beta-ol                                                                                                       | 414.79 | 7.89 | 1 | 1 | 10.39 | 1.43  | 1.13  | 0.75 | 0    |       |
| MOL000027 | alpha-Curcumene                                                                                                                | 202.37 | 5.34 | 0 | 0 | 4.68  | 1.93  | 1.99  | 0.06 | 0    |       |
| MOL000028 | 伪-Amyrin                                                                                                                       | 426.8  | 7.35 | 1 | 1 | 39.51 | 1.42  | 1.28  | 0.76 | 0    | 3.83  |
| MOL000029 | beta-Humulene                                                                                                                  | 204.39 | 5.09 | 0 | 0 | 26.87 | 1.82  | 2.01  | 0.06 | 0    |       |
| MOL000030 | (1R)-2-methyl-1-phenylprop-2-en-1-ol                                                                                           | 148.22 | 2.32 | 1 | 1 | 75.1  | 1.27  | 1.38  | 0.03 | 0    | -2.13 |
| MOL000031 | (3S)-3-[(1R)-1,5-dimethylhex-4-enyl]-6-methylenecyclohexene                                                                    | 204.39 | 5.14 | 0 | 0 | 19.86 | 1.88  | 1.99  | 0.06 | 0    |       |
| MOL000032 | beta-Eudesmol                                                                                                                  | 222.41 | 3.72 | 1 | 1 | 26.09 | 1.32  | 1.38  | 0.1  | 0    |       |
| MOL000033 | (3S,8S,9S,10R,13R,14S,17R)-10,13-dimethyl-17-[(2R,5S)-5-propan-2-yl]octan-2-yl]-7-dodecahydro-1H-cyclopenta[a]phenanthren-3-ol | 428.82 | 8.54 | 1 | 1 | 36.23 | 1.45  | 1.09  | 0.78 | 0    | 5.22  |
| MOL000034 | 2-[(1R,3S,4S)-3-isopropenyl-4-methyl-4-vinylcyclohexyl]propan-2-ol                                                             | 222.41 | 3.7  | 1 | 1 | 19.03 | 1.37  | 1.46  | 0.07 | 0    |       |
| MOL000035 | beta-Selinene                                                                                                                  | 204.39 | 4.81 | 0 | 0 | 24.39 | 1.83  | 2.12  | 0.08 | 0    |       |
| MOL000036 | beta-caryophyllene                                                                                                             | 204.39 | 4.75 | 0 | 0 | 29.7  | 1.83  | 2.07  | 0.09 | 0    |       |
| MOL000037 | 纬-elemene                                                                                                                      | 204.39 | 4.93 | 0 | 0 | 23.79 | 1.87  | 2.1   | 0.06 | 0    |       |
| MOL000038 | Akridin                                                                                                                        | 179.23 | 3.35 | 0 | 1 | 33.71 | 1.63  | 1.53  | 0.1  | 0    | 6.82  |
| MOL000039 | (1S,2R,4R)-Neoiso-dihydrocarveol                                                                                               | 154.28 | 2.58 | 1 | 1 | 52.4  | 1.38  | 1.69  | 0.03 | 0    | 11.46 |
| MOL000040 | Scopoletol                                                                                                                     | 192.18 | 1.62 | 1 | 4 | 27.77 | 0.71  | 0.3   | 0.08 | 0    |       |
| MOL000041 | PHA                                                                                                                            | 165.21 | 0.96 | 3 | 3 | 41.62 | 0.36  | 0.22  | 0.04 | 0    | 4.62  |
| MOL000042 | LPG                                                                                                                            | 89.11  | -0.6 | 3 | 3 | 87.69 | -0.34 | -0.77 | 0.01 | 0    | 11.58 |
| MOL000043 | atractylenolide i                                                                                                              | 230.33 | 3.32 | 0 | 2 | 37.37 | 1.3   | 1.29  | 0.15 | 0    | 7.1   |
| MOL000044 | atractylenolideII                                                                                                              | 232.35 | 3.57 | 0 | 2 | 47.5  | 1.3   | 1.37  | 0.15 | 0    | 7.21  |
| MOL000045 | atractylenolide iii                                                                                                            | 248.35 | 2.93 | 1 | 3 | 68.11 | 0.75  | 0.63  | 0.17 | 0    | 7.17  |
| MOL000046 | atractylone                                                                                                                    | 216.35 | 4.11 | 0 | 1 | 41.1  | 1.76  | 1.85  | 0.13 | 0    | 1.74  |
| MOL000047 | juniper camphor                                                                                                                | 222.41 | 3.93 | 1 | 1 | 33.3  | 1.44  | 1.61  | 0.1  | 0    | 9.27  |

BaiZhu



|           |                                                                |        |       |   |   |       |       |       |      |      |       |
|-----------|----------------------------------------------------------------|--------|-------|---|---|-------|-------|-------|------|------|-------|
| MOL000048 | (5E,9Z)-3,6,10-trimethyl-4,7,8,11-tetrahydrocyclodeca[b]furan  | 216.35 | 4.63  | 0 | 1 | 43.17 | 1.77  | 1.83  | 0.1  | 0    | -1.4  |
| MOL000049 | 3尾-acetoxyatractylone                                          | 274.39 | 3.39  | 0 | 3 | 54.07 | 1.13  | 1.08  | 0.22 | 0    | -1.31 |
| MOL000050 | GLY                                                            | 75.08  | -0.98 | 3 | 3 | 48.74 | -0.56 | -1.03 | 0    | 0    | 11.95 |
| MOL000051 | Polymannose                                                    | 180.18 | -2.68 | 5 | 6 | 1.76  | -1.94 | -4.53 | 0.03 | 0    |       |
| MOL000052 | Gulutamine                                                     | 147.15 | -0.92 | 4 | 5 | 6.66  | -1.05 | -1.97 | 0.02 | 0    |       |
| MOL000053 | Methose                                                        | 180.18 | -2.69 | 5 | 6 | 1.68  | -1.8  | -4.58 | 0.03 | 0    |       |
| MOL000054 | L-                                                             | 174.24 | -1.11 | 7 | 6 | 47.64 | -0.49 | -1.04 | 0.03 | 0    | 0.85  |
| MOL000055 | L-Lysin                                                        | 146.22 | -0.68 | 5 | 4 | 29.33 | -0.66 | -1.44 | 0.02 | 0    |       |
| MOL000056 | DTY                                                            | 181.21 | 0.69  | 4 | 4 | 57.55 | -0.1  | -0.49 | 0.05 | 0    | 0.96  |
| MOL000057 | DIBP                                                           | 278.38 | 3.92  | 0 | 4 | 49.63 | 0.85  | 0.68  | 0.13 | 0    | 3.94  |
| MOL000058 | 2-[(2R,5S,6S)-6,10-dimethylspiro[4.5]dec-9-en-2-yl]propan-2-ol | 222.41 | 3.67  | 1 | 1 | 38.59 | 1.34  | 1.42  | 0.09 | 0    | 7.61  |
| MOL000059 | uridine                                                        | 244.23 | -2.45 | 4 | 8 | 10.49 | -1.14 | -1.61 | 0.11 | 0    |       |
| MOL000060 | selina-4(14),7(11)-dien-8-one                                  | 218.37 | 3.81  | 0 | 1 | 32.31 | 1.42  | 1.57  | 0.1  | 0    | 7.68  |
| MOL000061 | Prolinum                                                       | 115.15 | -0.06 | 2 | 3 | 77.57 | 0.22  | 0.29  | 0.01 | 0    | 11.13 |
| MOL000062 | biatractylolide                                                | 462.68 | 6.68  | 0 | 4 | 17.45 | 0.83  | 0.37  | 0.81 | 0    |       |
| MOL000063 | ATRACTYLODES<br>MACROCEPHALA                                   | 462.68 | 6.68  | 0 | 4 | 14.6  | 0.88  | 0.6   | 0.81 | 0    |       |
| MOL000064 | D-Serin                                                        | 105.11 | -1.49 | 4 | 4 | 83.59 | -0.94 | -1.75 | 0.01 | 0    | 11.51 |
| MOL000065 | ASI                                                            | 133.12 | -1.25 | 4 | 5 | 79.74 | -1.02 | -1.53 | 0.02 | 0    | 11.38 |
| MOL000066 | alloaromadrene                                                 | 204.39 | 4.22  | 0 | 0 | 53.46 | 1.83  | 2.1   | 0.1  | 0    | 12.51 |
| MOL000067 | L-Valin                                                        | 117.17 | 0.24  | 3 | 3 | 53.33 | 0.04  | -0.14 | 0.01 | 0    | 11.34 |
| MOL000068 | L-Ile                                                          | 131.2  | 0.7   | 3 | 3 | 59.05 | 0.06  | -0.11 | 0.02 | 0    | 11.21 |
| MOL000069 | palmitic acid                                                  | 256.48 | 6.37  | 1 | 2 | 19.3  | 1.09  | 1     | 0.1  | 0    |       |
| MOL000070 | Ethyl pivaloylacetate                                          | 172.25 | 1.69  | 0 | 3 | 40.52 | 0.82  | 0.83  | 0.03 | 0    | 1.92  |
| MOL000071 | Istidina                                                       | 155.18 | -1.01 | 4 | 4 | 53.18 | -0.25 | -0.4  | 0.03 | 0    | -5.72 |
| MOL000072 | 8β-ethoxy atractylenolide III                                  | 276.41 | 3.68  | 0 | 3 | 35.95 | 1.08  | 1.12  | 0.21 | 0    | 8.34  |
| MOL001212 | Loxanol V                                                      | 214.44 | 5.53  | 1 | 1 | 14.19 | 1.27  | 0.98  | 0.05 | 0.14 |       |
| MOL001218 | Pisol                                                          | 186.38 | 4.62  | 1 | 1 | 18.5  | 1.23  | 1.06  | 0.03 | 0.14 |       |
| MOL001312 | 9-HEXADECENOIC ACID                                            | 254.46 | 5.92  | 1 | 2 | 35.78 | 1.1   | 0.85  | 0.1  | 0.2  | 5.61  |
| MOL001392 | Methyl myristate                                               | 242.45 | 5.71  | 0 | 2 | 19.68 | 1.36  | 1.19  | 0.08 | 0.14 |       |
| MOL001396 | PENTADECYLIC ACID                                              | 242.45 | 5.91  | 1 | 2 | 20.18 | 1.08  | 0.88  | 0.08 | 0.18 |       |
| MOL001641 | METHYL LINOLEATE                                               | 294.53 | 6.64  | 0 | 2 | 41.93 | 1.44  | 1.08  | 0.17 | 0.21 | 6.05  |
| MOL001706 | 2,6-dimethyl-3,7-octadiene-2,6-diol                            | 170.28 | 1.33  | 2 | 2 | 52.4  | 0.47  | 0.51  | 0.03 | 0.33 | 6.57  |
| MOL001738 | MLI                                                            | 104.07 | -0.44 | 2 | 4 | 21.69 | -0.23 | -0.25 | 0.01 | 0.44 |       |
| MOL001817 | Methyl stearate                                                | 298.57 | 7.53  | 0 | 2 | 16.8  | 1.41  | 1.29  | 0.16 | 0.16 |       |

|           |                                                                                                                                                             |        |       |   |    |       |       |       |      |      |       |
|-----------|-------------------------------------------------------------------------------------------------------------------------------------------------------------|--------|-------|---|----|-------|-------|-------|------|------|-------|
| MOL001818 | Methyl palmitelaidate                                                                                                                                       | 268.49 | 6.17  | 0 | 2  | 34.61 | 1.4   | 1.22  | 0.12 | 0.17 | 5.58  |
| MOL001819 | METHYL<br>PENTADECANOATE                                                                                                                                    | 256.48 | 6.16  | 0 | 2  | 18.82 | 1.37  | 1.28  | 0.1  | 0.17 |       |
| MOL001949 | panaxynol                                                                                                                                                   | 244.41 | 5.68  | 1 | 1  | 42.44 | 1.52  | 1.03  | 0.1  | 0.32 | 7.14  |
| MOL001965 | Dauricine (8CI)                                                                                                                                             | 624.84 | 7.22  | 1 | 8  | 23.65 | 0.9   | 0.03  | 0.37 | 0.22 |       |
| MOL002121 | (1S,4E,8E,10R)-4,8,11,11-tetramethylbicyclo[8.1.0]undeca-4,8-diene                                                                                          | 204.39 | 4.7   | 0 | 0  | 21.69 | 1.86  | 2.02  | 0.08 | 0.26 |       |
| MOL002136 | neocnidilide                                                                                                                                                | 194.3  | 3.37  | 0 | 2  | 83.83 | 1.23  | 1.32  | 0.07 | 0.28 | 5.38  |
| MOL002137 | OCT                                                                                                                                                         | 114.26 | 4.02  | 0 | 0  | 29.72 | 1.78  | 2.02  | 0.01 | 0.19 |       |
| MOL002307 | 20-Hexadecanoylingenol                                                                                                                                      | 586.94 | 7.38  | 3 | 6  | 28.2  | 0.3   | -0.04 | 0.68 | 0.24 |       |
| MOL002312 | [(3S,4R,5R)-5-[[[(2R,3S,4S,5R,6S)-6-(2-acetyl-5-methoxyphenoxy)-3,4,5-trihydroxyoxan-2-yl]methoxy]-3,4-dihydroxyoxolan-3-yl]methyl 3,4,5-trihydroxybenzoate | 612.59 | -0.79 | 8 | 16 | 5.61  | -2.17 | -3.07 | 0.63 | 0.34 |       |
| MOL002323 | L-Adenosine                                                                                                                                                 | 267.28 | -2.02 | 5 | 8  | 18.06 | -1.42 | -1.99 | 0.18 | 0.22 |       |
| MOL002377 | Kaempferol-3-arabofuranoside                                                                                                                                | 418.38 | 0.19  | 6 | 10 | 2.73  | -1.08 | -2.01 | 0.65 | 0.34 |       |
| MOL002526 | 3691-11-0                                                                                                                                                   | 204.39 | 4.99  | 0 | 0  | 23.66 | 1.86  | 2.05  | 0.07 | 0.25 |       |
| MOL002669 | Campesteryl ferulate                                                                                                                                        | 576.94 | 9.86  | 1 | 4  | 22.1  | 1.1   | 0.06  | 0.59 | 0.26 |       |
| MOL000269 | Elemicin                                                                                                                                                    | 208.28 | 2.79  | 0 | 3  | 21.94 | 1.41  | 1.28  | 0.06 | 0.2  |       |
| MOL002879 | Diop                                                                                                                                                        | 390.62 | 7.44  | 0 | 4  | 43.59 | 0.79  | 0.26  | 0.39 | 0.28 | 3.6   |
| MOL000029 | beta-Humulene                                                                                                                                               | 204.39 | 5.09  | 0 | 0  | 26.87 | 1.82  | 2.01  | 0.06 | 0    |       |
| MOL000449 | Stigmasterol                                                                                                                                                | 412.77 | 7.64  | 1 | 1  | 43.83 | 1.44  | 1     | 0.76 | 0.22 | 5.57  |
| MOL003346 | Pseudohypericin                                                                                                                                             | 520.46 | 3.8   | 7 | 9  | 16.94 | -0.2  | -1.61 | 0.07 | 0.34 |       |
| MOL000358 | beta-sitosterol                                                                                                                                             | 414.79 | 8.08  | 1 | 1  | 36.91 | 1.32  | 0.99  | 0.75 | 0.23 | 5.36  |
| MOL000036 | beta-caryophyllene                                                                                                                                          | 204.39 | 4.75  | 0 | 0  | 29.7  | 1.83  | 2.07  | 0.09 | 0    |       |
| MOL003648 | Inermin                                                                                                                                                     | 284.28 | 2.44  | 1 | 5  | 65.83 | 0.91  | 0.36  | 0.54 | 0.3  | 11.73 |
| MOL003845 | Folinic acid                                                                                                                                                | 473.5  | -0.04 | 8 | 14 | 23.6  | -1.7  | -2.58 | 0.74 | 0.34 |       |
| MOL003902 | methyl (Z)-icos-11-enoate                                                                                                                                   | 324.61 | 8     | 0 | 2  | 29.49 | 1.41  | 1.11  | 0.23 | 0.16 |       |
| MOL004100 | N-Salicylidene-salicylamine                                                                                                                                 | 227.28 | 2.9   | 2 | 3  | 95.46 | 1.12  | 0.48  | 0.11 | 0    | 3.84  |
| MOL004174 | epsilon-Cadinene                                                                                                                                            | 204.39 | 4.85  | 0 | 0  | 16.41 | 1.82  | 2.12  | 0.08 | 0.29 |       |
| MOL000422 | kaempferol                                                                                                                                                  | 286.25 | 1.77  | 4 | 6  | 41.88 | 0.26  | -0.55 | 0.24 | 0    | 14.74 |
| MOL004237 | 未-elemene                                                                                                                                                   | 204.39 | 4.73  | 0 | 0  | 25.99 | 1.84  | 2.1   | 0.06 | 0.31 |       |
| MOL004275 | (1R,4E,7E,11R)-1,5,9,9-tetramethyl-12-oxabicyclo[9.1.0]dodeca-4,7-diene                                                                                     | 220.39 | 3.8   | 0 | 1  | 23.66 | 1.58  | 1.77  | 0.1  | 0.29 |       |

|           |                                                                                                                                                                                             |        |      |   |    |       |       |       |      |      |       |
|-----------|---------------------------------------------------------------------------------------------------------------------------------------------------------------------------------------------|--------|------|---|----|-------|-------|-------|------|------|-------|
| MOL004492 | Chrysanthemaxanthin                                                                                                                                                                         | 584.96 | 8.24 | 2 | 3  | 38.72 | 0.51  | -0.98 | 0.58 | 0.3  | 17.47 |
| MOL004498 | 12-O-Nicotinoylisolineolone                                                                                                                                                                 | 469.63 | 1.32 | 3 | 7  | 20.7  | -0.54 | -1.19 | 0.83 | 0.31 |       |
| MOL004647 | TDA                                                                                                                                                                                         | 214.39 | 5    | 1 | 2  | 22.32 | 1.04  | 0.89  | 0.05 | 0.21 |       |
| MOL005155 | ginsenoside Ro_qt                                                                                                                                                                           | 455.77 | 5.74 | 1 | 3  | 17.62 | 0.38  | 0.05  | 0.76 | 0.04 |       |
| MOL005269 | (+)-Maali oxide                                                                                                                                                                             | 222.41 | 3.47 | 0 | 1  | 55.93 | 1.59  | 1.93  | 0.13 | 0.22 | 16.64 |
| MOL005270 | n-Heptadecanol                                                                                                                                                                              | 256.53 | 6.9  | 1 | 1  | 12.97 | 1.31  | 0.98  | 0.09 | 0.15 |       |
| MOL005271 | 1-HEXADECYNE                                                                                                                                                                                | 222.46 | 7.86 | 0 | 0  | 3.94  | 1.89  | 1.87  | 0.06 | 0.23 |       |
| MOL005272 | 13-Tetradecenyl acetate                                                                                                                                                                     | 254.46 | 5.52 | 0 | 2  | 36.76 | 1.36  | 1.06  | 0.1  | 0.2  | 5.71  |
| MOL005273 | 16-Oxoseratenediol                                                                                                                                                                          | 456.78 | 5.52 | 2 | 3  | 15.1  | 0.4   | -0.25 | 0.75 | 0.24 |       |
| MOL005274 | Neohexane                                                                                                                                                                                   | 86.2   | 2.65 | 0 | 0  | 37.81 | 1.77  | 2.16  | 0.01 | 0.25 | 11.05 |
| MOL005275 | 2,3,4-Trimethyldecane                                                                                                                                                                       | 184.41 | 5.69 | 0 | 0  | 16.15 | 1.82  | 2.08  | 0.03 | 0.21 |       |
| MOL005276 | 2,3,8-Trimethyldecane                                                                                                                                                                       | 184.41 | 5.69 | 0 | 0  | 5.51  | 1.79  | 1.95  | 0.03 | 0.22 |       |
| MOL005277 | 2,6,10,15-tetramethylheptadecane                                                                                                                                                            | 296.65 | 9.13 | 0 | 0  | 13.73 | 1.85  | 1.86  | 0.13 | 0.19 |       |
| MOL005278 | 2-METHYLTRIDECANE                                                                                                                                                                           | 198.44 | 6.55 | 0 | 0  | 5.75  | 1.81  | 1.9   | 0.04 | 0.18 |       |
| MOL005279 | ginsenoside-Rh1                                                                                                                                                                             | 638.98 | 2.87 | 7 | 9  | 3.86  | -1.17 | -2.14 | 0.57 | 0.25 |       |
| MOL005280 | ginsenoside-Rh1_qt                                                                                                                                                                          | 476.82 | 4.62 | 4 | 4  | 20.13 | -0.02 | -0.9  | 0.78 | 0.24 |       |
| MOL005281 | 20(S)-Ginsenoside-Rh1                                                                                                                                                                       | 638.98 | 2.87 | 7 | 9  | 3.94  | -1.1  | -2.04 | 0.57 | 0.25 |       |
| MOL005282 | 20(S)-Ginsenoside-Rh1_qt                                                                                                                                                                    | 476.82 | 4.62 | 4 | 4  | 20.13 | 0.17  | -0.56 | 0.78 | 0.24 |       |
| MOL005283 | 20(S)-ginsenoside-Rg2                                                                                                                                                                       | 785.14 | 2.02 | 9 | 13 | 10.09 | -1.94 | -2.78 | 0.26 | 0.23 |       |
| MOL005284 | (3S,5R,6S,8R,9R,10R,12R,13R,14R,17S)-17-[(2S)-2-hydroxy-6-methylhept-5-en-2-yl]-4,4,8,10,14-pentamethyl-2,3,5,6,7,9,11,12,13,15,16,17-dodecahydro-1H-cyclopenta[a]phenanthrene-3,6,12-triol | 476.82 | 4.62 | 4 | 4  | 20.13 | 0.01  | -0.82 | 0.78 | 0.25 |       |
| MOL005285 | 20(s)-protopanaxadiol                                                                                                                                                                       | 460.82 | 5.79 | 3 | 3  | 29.69 | 0.57  | -0.07 | 0.77 | 0.23 |       |
| MOL005286 | 20(R)-ginsenoside Rg2                                                                                                                                                                       | 785.14 | 2.02 | 9 | 13 | 10.09 | -1.96 | -2.95 | 0.26 | 0.27 |       |
| MOL005287 | 20-(S)-Ginsenoside-Rg3                                                                                                                                                                      | 785.14 | 2.3  | 9 | 13 | 13.69 | -1.65 | -2.47 | 0.22 | 0.24 |       |
| MOL005288 | 20-(S)-Ginsenoside-Rg3_qt                                                                                                                                                                   | 460.82 | 5.79 | 3 | 3  | 29.69 | 0.55  | -0.12 | 0.77 | 0.24 |       |
| MOL005289 | 3,4-Dimethylheptane                                                                                                                                                                         | 128.29 | 4.07 | 0 | 0  | 46.67 | 1.78  | 2.05  | 0.01 | 0.24 | 11.02 |
| MOL005290 | 3,5-Dimethyl-p-anisic acid                                                                                                                                                                  | 180.22 | 2.39 | 1 | 3  | 61.11 | 0.75  | 0.56  | 0.05 | 0.34 | 2.11  |
| MOL005291 | 3-O-beta-D-Glucuronopyranosyl gypsogenin                                                                                                                                                    | 646.9  | 4.05 | 5 | 10 | 8.68  | -0.78 | -1.37 | 0.32 | 0.27 |       |
| MOL005292 | 3-O-beta-D-Glucuronopyranosyl gypsogenin_qt                                                                                                                                                 | 470.76 | 5.59 | 2 | 4  | 23.72 | 0.22  | -0.4  | 0.75 | 0.26 |       |

|           |                                                                                                                                                          |         |       |    |    |        |       |       |      |      |       |
|-----------|----------------------------------------------------------------------------------------------------------------------------------------------------------|---------|-------|----|----|--------|-------|-------|------|------|-------|
| MOL005293 | 3-Ethyl-3-methylheptane                                                                                                                                  | 142.32  | 4.48  | 0  | 0  | 37.33  | 1.81  | 2.16  | 0.02 | 0.23 | 10.45 |
| MOL005294 | 3-methylheptane                                                                                                                                          | 114.26  | 3.82  | 0  | 0  | 37.1   | 1.8   | 2.18  | 0.01 | 0.22 | 10.55 |
| MOL005295 | 3-methylundecane                                                                                                                                         | 170.38  | 5.64  | 0  | 0  | 6.57   | 1.79  | 1.96  | 0.02 | 0.19 |       |
| MOL005296 | 4-Methyldodecane                                                                                                                                         | 184.41  | 6.1   | 0  | 0  | 6.39   | 1.81  | 2.05  | 0.03 | 0.17 |       |
| MOL005297 | 5-Isobutylnonane                                                                                                                                         | 184.41  | 5.89  | 0  | 0  | 6.08   | 1.82  | 2.1   | 0.03 | 0.2  |       |
| MOL005298 | 5-heptadec-12-enylresorcinol                                                                                                                             | 346.61  | 8.64  | 2  | 2  | 3.29   | 1.38  | 0.79  | 0.32 | 0.25 |       |
| MOL005299 | 5-methyl-tetradecane                                                                                                                                     | 212.47  | 7.01  | 0  | 0  | 16.15  | 1.83  | 2.02  | 0.05 | 0.18 |       |
| MOL005300 | 6'-Malonylginsenoside Rd1                                                                                                                                | 1195.51 | -1.03 | 15 | 26 | 6.7    | -4.21 | -5.39 | 0.03 | 0.29 |       |
| MOL005301 | 6'-Malonylginsenoside Rd1_qt1                                                                                                                            | 460.82  | 5.79  | 3  | 3  | 29.69  | 0.56  | -0.13 | 0.77 | 0.25 |       |
| MOL005302 | 7-(beta-Xylosyl)cephalomannine                                                                                                                           | 962.15  | 1.97  | 6  | 18 | 27.33  | -1.67 | -2.25 | 0.17 | 0.32 |       |
| MOL005303 | 7-Tetradecyne                                                                                                                                            | 194.4   | 6.44  | 0  | 0  | 20.07  | 1.93  | 1.81  | 0.04 | 0.19 |       |
| MOL005304 | 7alpha-L-Rhamnosyl-6-methoxylutcolin                                                                                                                     | 462.44  | 1.03  | 6  | 11 | 15.03  | -0.69 | -1.99 | 0.79 | 0.29 |       |
| MOL005305 | Nepetin                                                                                                                                                  | 316.28  | 2.05  | 4  | 7  | 26.75  | 0.37  | -0.78 | 0.31 | 0.27 |       |
| MOL005306 | Acetal                                                                                                                                                   | 118.2   | 0.78  | 0  | 2  | 26.4   | 1.25  | 1.46  | 0.01 | 0.23 |       |
| MOL005307 | Adenosine triphosphate                                                                                                                                   | 491.22  | -4.3  | 8  | 16 | 8.23   | -3.1  | -3.75 | 0.58 | 0.38 |       |
| MOL005308 | Aposiopolamine                                                                                                                                           | 271.34  | 1.39  | 1  | 4  | 66.65  | 0.66  | 0.4   | 0.22 | 0.35 | 3.54  |
| MOL005309 | Araloside A                                                                                                                                              | 927.21  | 1.74  | 10 | 18 | 16.96  | -3.32 | -3.74 | 0.06 | 0.26 |       |
|           | (4aS,6aR,6aS,6bR,8aR,10S,12aR,14bR)-10-hydroxy-2,2,6a,6b,9,9,12a-heptamethyl-1,3,4,5,6,6a,7,8,8a,10,11,12,13,14b-tetradecahydronicene-4a-carboxylic acid | 456.78  | 6.42  | 2  | 3  | 14.36  | 0.6   | 0.1   | 0.76 | 0.25 |       |
| MOL005311 | Argininyl-fructosyl-glucose                                                                                                                              | 498.56  | -4.63 | 13 | 16 | 0.74   | -3.12 | -3.75 | 0.62 | 0.25 |       |
| MOL005312 | Argininyl-fructosyl-glucose_qt                                                                                                                           | 336.4   | -2.88 | 10 | 11 | 11.25  | -1.74 | -2.3  | 0.22 | 0.25 |       |
| MOL005313 | 5-[(3aS,6R,6aR)-2-keto-1,3,3a,4,6,6a-hexahydrothieno[3,4-d]imidazol-6-yl]valeric acid                                                                    | 244.35  | 0.65  | 3  | 5  | 75.75  | -0.04 | -0.28 | 0.1  | 0.32 | 3.72  |
| MOL005314 | Celabenzine                                                                                                                                              | 379.55  | 2.29  | 2  | 5  | 101.88 | 0.77  | 0.05  | 0.49 | 0.35 | 8.15  |
| MOL005315 | (R)-(-)-Citronellal                                                                                                                                      | 154.28  | 3.02  | 0  | 1  | 50.78  | 1.37  | 1.61  | 0.02 | 0.28 | 5.35  |
| MOL005316 | MAV                                                                                                                                                      | 194.16  | -2.31 | 5  | 7  | 56.17  | -2.14 | -4.77 | 0.06 | 0.34 | 11.27 |
| MOL005317 | Deoxyharringtonine                                                                                                                                       | 515.66  | 3.13  | 1  | 9  | 39.27  | 0.19  | -0.25 | 0.81 | 0.23 | 7.9   |
| MOL005318 | Dianthramine                                                                                                                                             | 289.26  | 2.05  | 5  | 7  | 40.45  | -0.23 | -0.97 | 0.2  | 0.42 | 5.14  |
| MOL005319 | Ditertbutyl phthalate                                                                                                                                    | 278.38  | 3.4   | 0  | 4  | 43.67  | 1.13  | 1.13  | 0.13 | 0.33 | -1.91 |

|           |                                                                                                                                                                                       |         |       |    |    |       |       |       |      |      |      |
|-----------|---------------------------------------------------------------------------------------------------------------------------------------------------------------------------------------|---------|-------|----|----|-------|-------|-------|------|------|------|
| MOL005320 | arachidonate                                                                                                                                                                          | 304.52  | 6.41  | 1  | 2  | 45.57 | 1.27  | 0.58  | 0.2  | 0.26 | 7.56 |
| MOL005321 | Frutinone A                                                                                                                                                                           | 264.24  | 2.7   | 0  | 4  | 65.9  | 0.89  | 0.46  | 0.34 | 0.47 | 19.1 |
| MOL005322 | Gamma-Selinene                                                                                                                                                                        | 204.39  | 4.95  | 0  | 0  | 22.58 | 1.84  | 2.11  | 0.08 | 0.26 |      |
| MOL005323 | ginsenoside La                                                                                                                                                                        | 783.12  | 1.84  | 8  | 13 | 17.74 | -1.9  | -3.25 | 0.14 | 0.24 |      |
| MOL005324 | ginsenoside La_qt                                                                                                                                                                     | 458.8   | 5.33  | 2  | 3  | 15.7  | 0.65  | 0.04  | 0.78 | 0.24 |      |
| MOL005325 | ginsenoside Ro                                                                                                                                                                        | 957.24  | 1.23  | 11 | 19 | 1.98  | -2.86 | -3.92 | 0.05 | 0.26 |      |
| MOL005326 | Ginsenoside-Ra0                                                                                                                                                                       | 1271.62 | -2.94 | 18 | 28 | 7.3   | -5.56 | -6.76 | 0.01 | 0.22 |      |
| MOL005327 | Gypnoside V_qt                                                                                                                                                                        | 460.82  | 5.79  | 3  | 3  | 29.69 | 0.3   | -0.57 | 0.77 | 0.25 |      |
| MOL005328 | Ginsenoside-Ra1                                                                                                                                                                       | 1211.56 | -1.92 | 16 | 26 | 7.09  | -4.51 | -6.41 | 0.02 | 0.22 |      |
| MOL005329 | Ginsenoside-Ra2                                                                                                                                                                       | 1211.56 | -1.92 | 16 | 26 | 7.62  | -4.43 | -6.28 | 0.02 | 0.24 |      |
| MOL005330 | Ginsenoside-Ra3                                                                                                                                                                       | 1241.59 | -2.43 | 17 | 27 | 7.19  | -4.67 | -6.3  | 0.02 | 0.26 |      |
| MOL005331 | ginsenoside Rb1                                                                                                                                                                       | 1109.46 | -1.2  | 15 | 23 | 6.24  | -3.99 | -5.6  | 0.04 | 0.23 |      |
|           | (3R,5R,8R,9R,10R,12R,13R,14R,17S)-17-[(2S)-2-hydroxy-6-methylhept-5-en-2-yl]-4,4,8,10,14-pentamethyl-2,3,5,6,7,9,11,12,13,15,16,17-dodecahydro-1H-cyclopenta[a]phenanthrene-3,12-diol |         |       |    |    |       |       |       |      |      |      |
| MOL005332 | ginsenoside-Rb2                                                                                                                                                                       | 1079.43 | -0.69 | 14 | 22 | 6.02  | -3.92 | -5.43 | 0.04 | 0.26 |      |
|           | (3S,5R,8R,9R,10R,12R,13R,14R,17S)-17-[(2S)-2-hydroxy-6-methylhept-5-en-2-yl]-4,4,8,10,14-pentamethyl-2,3,5,6,7,9,11,12,13,15,16,17-dodecahydro-1H-cyclopenta[a]phenanthrene-3,12-diol |         |       |    |    |       |       |       |      |      |      |
| MOL005333 | Gypenoside LXIX                                                                                                                                                                       | 1079.43 | -0.69 | 14 | 22 | 7.73  | -3.58 | -5.38 | 0.04 | 0.24 |      |
| MOL005334 | ginsenoside-Rc                                                                                                                                                                        | 1079.43 | -0.69 | 14 | 22 | 8.16  | -3.97 | -5.69 | 0.04 | 0.25 |      |

RenShen

|           |                                                                                                                                                                                                                                                     |        |      |    |    |       |       |       |      |      |       |
|-----------|-----------------------------------------------------------------------------------------------------------------------------------------------------------------------------------------------------------------------------------------------------|--------|------|----|----|-------|-------|-------|------|------|-------|
|           | (2S,3R,4S,5S,6R)-2-[(2S)-2-[(3S,5R,8R,9R,10R,12R,13R,14R,17S)-3-[(2R,3R,4S,5S,6R)-4,5-dihydroxy-6-(hydroxymethyl)-3-[(2S,3R,4S,5S,6R)-3,4,5-trihydroxy-6-(hydroxymethyl)oxan-2-yl]oxyoxan-2-yl]oxy-12-hydroxy-4,4,8,10,14-pentamethyl-              |        |      |    |    |       |       |       |      |      |       |
| MOL005337 | Ginsenoside Re                                                                                                                                                                                                                                      | 947.3  | 0.55 | 12 | 18 | 5.5   | -3.17 | -4.47 | 0.09 | 0.24 |       |
| MOL005338 | ginsenoside rf                                                                                                                                                                                                                                      | 947.3  | 0.27 | 12 | 18 | 4.27  | -3.2  | -4.39 | 0.12 | 0.25 |       |
| MOL011400 | (3S,5R,6S,8R,9R,10R,12R,13R,14R,17S)-17-[(2R)-2-hydroxy-6-methylhept-5-en-2-yl]-4,4,8,10,14-pentamethyl-2,3,5,6,7,9,11,12,13,15,16,17-dodecahydro-1H-cyclopenta[a]phenanthrene-3,6,12-triol                                                         | 801.14 | 1.13 | 10 | 14 | 17.74 | -2.23 | -3.35 | 0.24 | 0.27 |       |
| MOL005340 | Sanchinoside C1                                                                                                                                                                                                                                     | 476.82 | 4.62 | 4  | 4  | 20.13 | 0.21  | -0.43 | 0.78 | 0.24 |       |
| MOL005341 | Ginsenoside-Rg3                                                                                                                                                                                                                                     | 801.14 | 1.13 | 10 | 14 | 10.04 | -2.27 | -3.5  | 0.28 | 0.24 |       |
| MOL005342 | Ginsenoside-Rg3_qt                                                                                                                                                                                                                                  | 785.14 | 2.3  | 9  | 13 | 17.75 | -2.02 | -2.75 | 0.22 | 0.25 |       |
| MOL005343 | ginsenoside rh2                                                                                                                                                                                                                                     | 460.82 | 5.79 | 3  | 3  | 29.69 | 0.31  | -0.58 | 0.77 | 0.26 |       |
| MOL005344 | (2R,3S,4S,5R,6R)-2-(hydroxymethyl)-6-[[[(3S,5R,8R,9R,10R,12R,13R,14R,17S)-12-hydroxy-4,4,8,10,14-pentamethyl-17-[(2Z)-6-methylhepta-2,5-dien-2-yl]-2,3,5,6,7,9,11,12,13,15,16,17-dodecahydro-1H-cyclopenta[a]phenanthren-3-yl]oxy]oxane-3,4,5-triol | 622.98 | 4.04 | 6  | 8  | 36.32 | -0.51 | -1.38 | 0.56 | 0.24 | 11.08 |
| MOL005345 | Ginsenoside-Rh3_qt                                                                                                                                                                                                                                  | 604.96 | 5.01 | 5  | 7  | 12.09 | -0.35 | -1.11 | 0.59 | 0.25 |       |
| MOL005346 | Ginsenoside-Rh4                                                                                                                                                                                                                                     | 442.8  | 6.76 | 2  | 2  | 13.09 | 0.97  | 0.42  | 0.76 | 0.26 |       |
| MOL005347 | Ginsenoside-Rh4_qt                                                                                                                                                                                                                                  | 620.96 | 3.84 | 6  | 8  | 5.22  | -0.73 | -1.65 | 0.6  | 0.25 |       |
| MOL005348 |                                                                                                                                                                                                                                                     | 458.8  | 5.59 | 3  | 3  | 31.11 | 0.5   | -0.18 | 0.78 | 0.25 | 6.97  |

|           |                           |         |       |    |    |       |       |       |      |      |       |
|-----------|---------------------------|---------|-------|----|----|-------|-------|-------|------|------|-------|
| MOL005349 | Ginsenoside-Rs1           | 1121.47 | -0.31 | 13 | 23 | 6.27  | -3.69 | -5.37 | 0.04 | 0.24 |       |
| MOL005350 | Ginsenoside-Rs2           | 1121.47 | -0.31 | 13 | 23 | 8.14  | -4.03 | -5.58 | 0.04 | 0.24 |       |
| MOL005351 | Ginsenoside A             | 258.39  | 4.3   | 1  | 2  | 66.22 | 0.99  | 0.02  | 0.13 | 0.36 | 5.14  |
| MOL005352 | Ginsenoside B             | 294.85  | 4.74  | 2  | 2  | 39.79 | 0.79  | -0.1  | 0.13 | 0.42 | 5.82  |
| MOL005353 | Ginsenoside C             | 276.41  | 3.53  | 3  | 3  | 43.38 | 0.15  | -0.81 | 0.13 | 0.36 | 5.5   |
| MOL005354 | Ginsenoside D             | 262.43  | 4.94  | 1  | 2  | 19.32 | 1.07  | 0.28  | 0.13 | 0.31 |       |
| MOL005355 | Ginsenoside E             | 258.39  | 4.93  | 0  | 2  | 36.53 | 1.05  | 0.46  | 0.13 | 0.37 | 6.72  |
| MOL005356 | Girinimbic                | 263.36  | 4.6   | 1  | 1  | 61.22 | 1.72  | 1.22  | 0.31 | 0.33 | 8.17  |
| MOL005357 | Gomisin B                 | 514.62  | 2.73  | 1  | 9  | 31.99 | 0.6   | 0.18  | 0.83 | 0.19 | 7.81  |
| MOL005358 | L-erythro-isocitric acid  | 192.14  | -1.34 | 4  | 7  | 32.95 | -1.46 | -1.71 | 0.04 | 0.41 | 11.65 |
| MOL005359 | D-erythro-Isocitric acid  | 192.14  | -1.34 | 4  | 7  | 65.43 | -1.67 | -2.22 | 0.04 | 0.4  | 11.43 |
| MOL005360 | malkangunin               | 432.56  | 1.84  | 2  | 7  | 57.71 | 0.22  | -0.17 | 0.63 | 0.3  | 4.09  |
| MOL005361 | Malonylginsenoside Rc     | 1165.48 | -0.52 | 14 | 25 | 7.84  | -4.27 | -5.65 | 0.03 | 0.25 |       |
| MOL005362 | Malonylginsenoside Rc_qt1 | 460.82  | 5.79  | 3  | 3  | 29.69 | 0.45  | -0.44 | 0.77 | 0.25 |       |
| MOL005363 | Malonylginsenoside Rd     | 1033.35 | 0.71  | 12 | 21 | 8.84  | -3.72 | -4.76 | 0.07 | 0.28 |       |
| MOL005364 | Malonylginsenoside Rd_qt  | 460.82  | 5.79  | 3  | 3  | 29.69 | 0.47  | -0.23 | 0.77 | 0.26 |       |
| MOL005365 | MAL                       | 342.34  | -4.26 | 8  | 11 | 1.8   | -2.7  | -6.56 | 0.24 | 0.21 |       |
| MOL005366 | Malvic acid               | 280.5   | 6.44  | 1  | 2  | 30.99 | 1.22  | 0.81  | 0.15 | 0.21 | 3.74  |
| MOL005367 | GUP                       | 180.18  | -2.51 | 5  | 6  | 43.04 | -1.82 | -4.46 | 0.04 | 0.26 | 11.1  |
| MOL005368 | Methyl tricosanoate       | 368.72  | 9.81  | 0  | 2  | 14.61 | 1.43  | 1.08  | 0.33 | 0.16 |       |
| MOL005369 | Mycosinol                 | 214.23  | 1.46  | 1  | 3  | 82.12 | 0.87  | -0.05 | 0.09 | 0.42 | 5.67  |
| MOL005370 | NN-Dimethyldecanamide     | 199.38  | 3.44  | 0  | 2  | 55.5  | 1.51  | 1.72  | 0.04 | 0.14 | 3.58  |
| MOL005371 | Nonacosanediol-6,8        | 188.35  | 2.79  | 2  | 2  | 17.79 | 0.56  | 0.2   | 0.03 | 0.22 |       |
| MOL005372 | notoginsenoside R2        | 771.11  | 1.64  | 9  | 13 | 17.74 | -2.22 | -3.12 | 0.28 | 0.25 |       |
| MOL005373 | notoginsenoside R2_qt     | 476.82  | 4.62  | 4  | 4  | 20.13 | 0.2   | -0.49 | 0.78 | 0.24 |       |
| MOL005374 | Notoginsenoside R6        | 963.3   | -0.62 | 13 | 19 | 4.7   | -3.46 | -4.39 | 0.12 | 0.24 |       |
| MOL005375 | Stearyl acetate           | 312.6   | 7.74  | 0  | 2  | 16.27 | 1.39  | 1.06  | 0.19 | 0.15 |       |
| MOL005376 | Panaxadiol                | 460.82  | 5.46  | 2  | 3  | 33.09 | 0.82  | 0.23  | 0.79 | 0.22 | 6.34  |
| MOL007500 | panaxatriol               | 476.82  | 4.29  | 3  | 4  | 15.42 | 0.52  | -0.07 | 0.79 | 0.22 |       |
| MOL005378 | Panaxxytriol              | 278.43  | 3.92  | 3  | 3  | 33.76 | 0.06  | -0.98 | 0.13 | 0.33 | 3.74  |
| MOL005379 | Pancratistatin            | 325.3   | -1.94 | 6  | 9  | 13.13 | -1.17 | -1.79 | 0.46 | 0.32 |       |
| MOL005380 | Pandamine                 | 552.79  | 3.87  | 4  | 9  | 16.15 | 0.11  | -0.34 | 0.79 | 0.35 |       |
| MOL005381 | 2-Formylpyrrole           | 95.11   | 0.97  | 1  | 1  | 41.58 | 1.12  | 1.44  | 0.01 | 0.14 | 4.34  |
| MOL005382 | Ramalic acid              | 346.36  | 3.77  | 3  | 7  | 6     | 0.35  | -0.13 | 0.3  | 0.33 |       |
| MOL005383 | Methylselenocysteine      | 182.1   | -0.27 | 3  | 3  | 35.74 | 0.01  | -0.13 | 0.01 | 0.43 | 11.69 |
| MOL005384 | suchilactone              | 368.41  | 3.73  | 0  | 6  | 57.52 | 0.82  | 0.28  | 0.56 | 0.28 | 9.03  |
| MOL005385 | Suffruticoside A_qt1      | 302.26  | -0.93 | 6  | 9  | 13.9  | -1.35 | -2.1  | 0.2  | 0.35 |       |
| MOL005386 | Vulgarin                  | 264.35  | 1.31  | 1  | 4  | 29.21 | 0.03  | -0.27 | 0.2  | 0.36 |       |
| MOL006651 | Trifolirhizin             | 446.44  | 0.54  | 4  | 10 | 7.62  | -0.83 | -1.58 | 0.79 | 0.28 |       |
| MOL005388 | Undecane, 3,6-dimethyl    | 184.41  | 5.89  | 0  | 0  | 12.85 | 1.79  | 2.03  | 0.03 | 0.21 |       |
| MOL005389 | PANGAMIC ACID             | 436.62  | 1.11  | 5  | 10 | 10.08 | -0.92 | -0.96 | 0.32 | 0.31 |       |

|           |                                                                                     |        |       |   |    |       |       |       |      |      |       |
|-----------|-------------------------------------------------------------------------------------|--------|-------|---|----|-------|-------|-------|------|------|-------|
| MOL005390 | 3-[[ (2S)-2,4-dihydroxy-3,3-dimethylbutanoyl]amino]propanoic acid                   | 219.27 | -0.98 | 4 | 6  | 21.29 | -0.85 | -1.25 | 0.06 | 0.29 |       |
| MOL005391 | (Z,Z)-alpha-farnesene                                                               | 204.39 | 5.46  | 0 | 0  | 8.47  | 1.92  | 1.85  | 0.05 | 0.36 |       |
| MOL005392 | alpha-Guttiiferin                                                                   | 452.59 | 6.41  | 3 | 6  | 4.43  | 0.59  | 0.24  | 0.65 | 0.3  |       |
| MOL000908 | beta-elemene                                                                        | 204.39 | 4.79  | 0 | 0  | 25.63 | 1.84  | 2.07  | 0.06 | 0.33 |       |
| MOL005394 | (Z)-2-methyl-5-[(1S,2R,4R)-2-methyl-3-methylene-2-beta-Selinene                     | 220.39 | 3.66  | 1 | 1  | 35.28 | 1.28  | 1.25  | 0.09 | 0.27 | 1.94  |
| MOL000035 | cis-Widdrol alpha-epoxide                                                           | 204.39 | 4.81  | 0 | 0  | 24.39 | 1.83  | 2.12  | 0.08 | 0    |       |
| MOL005396 | Dammarane                                                                           | 238.41 | 2.6   | 1 | 2  | 69.04 | 1.07  | 1     | 0.15 | 0.22 | 6.86  |
| MOL005397 | alexandrin                                                                          | 414.84 | 9.53  | 0 | 0  | 19.73 | 1.81  | 1.81  | 0.7  | 0.22 |       |
| MOL005398 | alexandrin_qt                                                                       | 576.95 | 6.34  | 4 | 6  | 20.63 | -0.1  | -0.79 | 0.63 | 0.22 |       |
| MOL005399 | ginsenoside Rg5                                                                     | 414.79 | 8.08  | 1 | 1  | 36.91 | 1.3   | 0.88  | 0.75 | 0.23 | 5.53  |
| MOL005400 | ginsenoside Rg5_qt                                                                  | 767.12 | 3.31  | 8 | 12 | 6.15  | -1.92 | -2.83 | 0.23 | 0.26 |       |
| MOL005401 | Methyl margarate                                                                    | 442.8  | 6.8   | 2 | 2  | 39.56 | 0.88  | 0.21  | 0.79 | 0.24 | 5.65  |
| MOL005402 | oleanane                                                                            | 284.54 | 7.08  | 0 | 2  | 17.41 | 1.37  | 1.25  | 0.14 | 0.17 |       |
| MOL005403 | p-Glucosyloxymandelonitrile                                                         | 412.82 | 8.66  | 0 | 0  | 6.69  | 1.83  | 1.92  | 0.76 | 0.22 |       |
| MOL005404 | darutoside                                                                          | 298.37 | -0.47 | 5 | 6  | 12.12 | -0.92 | -1.61 | 0.18 | 0.27 |       |
| MOL000628 | alloaromadendrene                                                                   | 574.93 | 5.89  | 4 | 6  | 21.32 | -0.26 | -0.96 | 0.63 | 0.22 |       |
| MOL000066 | DBP                                                                                 | 204.39 | 4.22  | 0 | 0  | 53.46 | 1.83  | 2.1   | 0.1  | 0    | 12.51 |
| MOL000676 | palmitic acid                                                                       | 278.38 | 4.2   | 0 | 4  | 64.54 | 0.8   | 0.56  | 0.13 | 0.34 | 5.41  |
| MOL000069 | Linoleic                                                                            | 256.48 | 6.37  | 1 | 2  | 19.3  | 1.09  | 1     | 0.1  | 0    |       |
| MOL000749 | Fumarine                                                                            | 280.5  | 6.39  | 1 | 2  | 41.9  | 1.23  | 0.81  | 0.14 | 0.23 | 5.27  |
| MOL000787 | MYS                                                                                 | 353.4  | 2.95  | 0 | 6  | 59.26 | 0.56  | -0.13 | 0.83 | 0.3  | 23.46 |
| MOL000864 | paeonol                                                                             | 212.47 | 7.22  | 0 | 0  | 13.98 | 1.81  | 1.92  | 0.05 | 0.15 |       |
| MOL000874 | methyl palmitate                                                                    | 166.19 | 1.29  | 1 | 3  | 28.79 | 0.93  | 0.84  | 0.04 | 0.32 |       |
| MOL000879 | tetradecane                                                                         | 270.51 | 6.62  | 0 | 2  | 18.09 | 1.37  | 1.18  | 0.12 | 0.14 |       |
| MOL000886 | Hepanal                                                                             | 198.44 | 6.76  | 0 | 0  | 15.94 | 1.79  | 1.78  | 0.04 | 0.15 |       |
| MOL000935 | (1R,4S,4aR,8aR)-4-isopropyl-1,6-dimethyl-3,4,4a,7,8,8a-hexahydro-2H-naphthalen-1-ol | 204.39 | 4.36  | 0 | 0  | 53.83 | 1.86  | 2.17  | 0.1  | 0.24 | 11.92 |
| MOL000942 | beta-Bisabolene                                                                     | 222.41 | 3.78  | 1 | 1  | 31.67 | 1.32  | 1.3   | 0.09 | 0.24 | 6.87  |
| MOL000968 | protocatechuic acid                                                                 | 204.39 | 5.33  | 0 | 0  | 29.59 | 1.88  | 2.13  | 0.06 | 0.29 |       |
| MOL000105 | o-xylene                                                                            | 154.13 | 0.9   | 3 | 4  | 25.37 | 0.1   | -0.17 | 0.04 | 0.43 |       |
| MOL001097 | m-xylene                                                                            | 106.18 | 2.8   | 0 | 0  | 45.55 | 1.85  | 2.08  | 0.01 | 0.41 | 11.86 |
| MOL001098 | p-xylene                                                                            | 106.18 | 2.8   | 0 | 0  | 47.43 | 1.83  | 2.02  | 0.01 | 0.39 | 11.82 |
| MOL001099 | (L)-alpha-Terpineol                                                                 | 106.18 | 2.8   | 0 | 0  | 48.74 | 1.83  | 2.06  | 0.01 | 0.39 | 11.71 |
| MOL000118 | Arachic acid                                                                        | 154.28 | 2.42  | 1 | 1  | 48.8  | 1.39  | 1.72  | 0.03 | 0.27 | 11.35 |
| MOL000012 |                                                                                     | 312.6  | 8.19  | 1 | 2  | 16.66 | 1.18  | 1.09  | 0.19 | 0.18 |       |



|           |                                  |        |       |    |    |       |       |       |      |      |       |
|-----------|----------------------------------|--------|-------|----|----|-------|-------|-------|------|------|-------|
| MOL001484 | Inermine                         | 284.28 | 2.44  | 1  | 5  | 75.18 | 0.89  | 0.4   | 0.54 | 0.3  | 11.72 |
| MOL001543 | Vicenin-2                        | 594.57 | -2.45 | 11 | 15 | 3.42  | -3.15 | -3.87 | 0.78 | 0.32 |       |
| MOL001599 | 伪-cubebol                        | 208.38 | 3.28  | 1  | 1  | 64.81 | 1.32  | 1.43  | 0.09 | 0.26 | 7.24  |
| MOL001696 | Morusin                          | 420.49 | 4.94  | 3  | 6  | 11.52 | 0.51  | -0.22 | 0.76 | 0.31 |       |
| MOL001737 | ICO                              | 161.17 | 1.73  | 2  | 2  | 33.86 | 0.82  | 0.63  | 0.05 | 0.3  | -7.7  |
| MOL001789 | isoliquiritigenin                | 256.27 | 2.9   | 3  | 4  | 85.32 | 0.44  | -0.41 | 0.15 | 0.46 | 17.66 |
| MOL001792 | DFV                              | 256.27 | 2.57  | 2  | 4  | 32.76 | 0.51  | -0.29 | 0.18 | 0.42 | 17.89 |
| MOL001850 | Izoforon                         | 138.23 | 2.06  | 0  | 1  | 44.98 | 1.28  | 1.66  | 0.03 | 0.32 | 11.4  |
| MOL000211 | Mairin                           | 456.78 | 6.52  | 2  | 3  | 55.38 | 0.73  | 0.22  | 0.78 | 0.26 | 8.87  |
| MOL002137 | OCT                              | 114.26 | 4.02  | 0  | 0  | 29.72 | 1.78  | 2.02  | 0.01 | 0.19 |       |
| MOL002166 | ISOHEPTANE                       | 100.23 | 3.36  | 0  | 0  | 59.94 | 1.81  | 2.25  | 0.01 | 0.22 | 10.67 |
| MOL002198 | Heptan                           | 100.23 | 3.57  | 0  | 0  | 41.8  | 1.77  | 2.04  | 0    | 0.2  | 10.36 |
| MOL002311 | Glycyrol                         | 366.39 | 4.85  | 2  | 6  | 90.78 | 0.71  | -0.2  | 0.67 | 0.28 | 9.85  |
| MOL000239 | Jaranol                          | 314.31 | 2.09  | 2  | 6  | 50.83 | 0.61  | -0.22 | 0.29 | 0.29 | 15.5  |
| MOL002547 | 21987_FLUKA                      | 136.26 | 2.68  | 0  | 0  | 40.92 | 1.84  | 2.14  | 0.04 | 0.26 | 11.22 |
| MOL002565 | Medicarpin                       | 270.3  | 2.66  | 1  | 4  | 49.22 | 1     | 0.53  | 0.34 | 0.31 | 8.46  |
| MOL000263 | oleanolic acid                   | 456.78 | 6.42  | 2  | 3  | 29.02 | 0.59  | 0.07  | 0.76 | 0.25 |       |
| MOL002678 | EB                               | 106.18 | 2.77  | 0  | 0  | 49.38 | 1.83  | 2.15  | 0.01 | 0.38 | 11.76 |
| MOL002693 | nicotiflorin                     | 594.57 | -1.18 | 9  | 15 | 3.64  | -1.77 | -2.55 | 0.73 | 0.3  |       |
| MOL002844 | Pinocembrin                      | 256.27 | 2.57  | 2  | 4  | 64.72 | 0.61  | 0.12  | 0.18 | 0.43 | 17.96 |
| MOL002850 | butylated hydroxytoluene         | 220.39 | 4.85  | 1  | 1  | 40.02 | 1.75  | 1.8   | 0.07 | 0.3  | 10.36 |
| MOL002943 | BuOH                             | 74.14  | 0.97  | 1  | 1  | 22.02 | 0.94  | 1.05  | 0    | 0.21 |       |
| MOL003218 | Neouralenol                      | 370.38 | 3.36  | 5  | 7  | 12.76 | 0.24  | -0.75 | 0.46 | 0.37 |       |
| MOL000354 | isorhamnetin                     | 316.28 | 1.76  | 4  | 7  | 49.6  | 0.31  | -0.54 | 0.31 | 0.32 | 14.34 |
| MOL000359 | sitosterol                       | 414.79 | 8.08  | 1  | 1  | 36.91 | 1.32  | 0.87  | 0.75 | 0.22 | 5.37  |
| MOL003656 | Lupiwighteone                    | 338.38 | 3.92  | 3  | 5  | 51.64 | 0.68  | -0.23 | 0.37 | 0.36 | 15.63 |
| MOL003662 | 7,4'-Dihydroxyflavone            | 254.25 | 2.6   | 2  | 4  | 19.18 | 0.56  | -0.16 | 0.18 | 0.43 |       |
| MOL003686 | Narcissoside                     | 624.6  | -1.19 | 9  | 16 | 5.09  | -2.14 | -2.74 | 0.65 | 0    |       |
| MOL003896 | 7-Methoxy-2-methyl<br>isoflavone | 266.31 | 3.36  | 0  | 3  | 42.56 | 1.16  | 0.56  | 0.2  | 0.33 | 16.89 |
| MOL000392 | formononetin                     | 268.28 | 2.58  | 1  | 4  | 69.67 | 0.78  | 0.02  | 0.21 | 0    | 17.04 |
| MOL003985 | 2-Caren-10-al                    | 150.24 | 2.04  | 0  | 1  | 44.74 | 1.37  | 1.63  | 0.05 | 0.28 | 11.47 |
| MOL000040 | Scopoletol                       | 192.18 | 1.62  | 1  | 4  | 27.77 | 0.71  | 0.3   | 0.08 | 0    |       |
| MOL000415 | rutin                            | 610.57 | -1.45 | 10 | 16 | 3.2   | -1.93 | -2.75 | 0.68 | 0    |       |
| MOL000417 | Calycosin                        | 284.28 | 2.32  | 2  | 5  | 47.75 | 0.52  | -0.43 | 0.24 | 0    | 17.1  |
| MOL000422 | kaempferol                       | 286.25 | 1.77  | 4  | 6  | 41.88 | 0.26  | -0.55 | 0.24 | 0    | 14.74 |
| MOL004328 | naringenin                       | 272.27 | 2.3   | 3  | 5  | 59.29 | 0.28  | -0.37 | 0.21 | 0.4  | 16.98 |
| MOL000437 | Hirsutrin                        | 464.41 | -0.59 | 8  | 12 | 1.86  | -1.66 | -2.31 | 0.77 | 0    |       |
| MOL000445 | 8-Prenylwighteone                | 406.51 | 5.78  | 3  | 5  | 23.22 | 0.93  | 0     | 0.54 | 0.33 |       |
| MOL004589 | Methylheptane                    | 114.26 | 3.82  | 0  | 0  | 28.65 | 1.79  | 2.12  | 0.01 | 0.21 |       |
| MOL000467 | Castanin                         | 298.31 | 2.57  | 1  | 5  | 23.54 | 0.77  | -0.1  | 0.27 | 0    |       |
| MOL004723 | beta-Terpinene                   | 136.26 | 3.5   | 0  | 0  | 42.29 | 1.85  | 2.12  | 0.02 | 0.29 | 11.21 |

|           |                                                                                                   |        |       |   |   |       |       |       |      |      |       |
|-----------|---------------------------------------------------------------------------------------------------|--------|-------|---|---|-------|-------|-------|------|------|-------|
| MOL000475 | anethole                                                                                          | 148.22 | 2.77  | 0 | 1 | 32.49 | 1.75  | 1.81  | 0.03 | 0    | 1.68  |
| MOL004801 | 2',7-Dihydroxy-4'-methoxyisoflavan-7-O-尾-d-glucopyranoside                                        | 434.48 | 0.59  | 5 | 9 | 10.46 | -1.02 | -1.82 | 0.73 | 0.31 |       |
| MOL004802 | (E)-1-butoxyhex-2-ene                                                                             | 156.3  | 3.31  | 0 | 1 | 41.72 | 1.5   | 1.56  | 0.02 | 0    | 6.68  |
| MOL004803 | 3-Hydroxyglabrol                                                                                  | 408.53 | 5.73  | 3 | 5 | 4.73  | 0.48  | -0.31 | 0.58 | 0.33 |       |
| MOL004804 | 18beta-glycyrrhetic acid (2S)-2-[4-hydroxy-3-(3-methylbut-2-enyl)phenyl]-                         | 470.76 | 5.49  | 2 | 4 | 22.05 | 0.1   | -0.53 | 0.74 | 0    |       |
| MOL004805 | 8,8-dimethyl-2,3-dihydropyrano[2,3-f]chromen-4-one                                                | 390.51 | 5.48  | 1 | 4 | 31.79 | 1     | 0.25  | 0.72 | 0.35 | 14.82 |
| MOL004806 | euchrenone                                                                                        | 406.56 | 6.35  | 1 | 4 | 30.29 | 1.09  | 0.39  | 0.57 | 0    | 15.89 |
| MOL004807 | glucuronic acid                                                                                   | 194.16 | -2.31 | 5 | 7 | 46.18 | -2.05 | -4.58 | 0.06 | 0    | 11.13 |
| MOL004808 | glyasperin B                                                                                      | 370.43 | 4.02  | 3 | 6 | 65.22 | 0.47  | -0.09 | 0.44 | 0    | 16.1  |
| MOL004809 | glyasperin E                                                                                      | 444.51 | 6.41  | 2 | 6 | 4.12  | 0.69  | -0.41 | 0.75 | 0    |       |
| MOL004810 | glyasperin F                                                                                      | 354.38 | 2.97  | 3 | 6 | 75.84 | 0.43  | -0.15 | 0.54 | 0    | 15.64 |
| MOL004811 | Glyasperin C                                                                                      | 356.45 | 4.73  | 3 | 5 | 45.56 | 0.71  | 0.07  | 0.4  | 0    | 3.13  |
| MOL004812 | glyasperins D                                                                                     | 370.48 | 4.99  | 2 | 5 | 29.91 | 0.89  | 0.25  | 0.43 | 0    |       |
| MOL004813 | glyasperins Z                                                                                     | 340.45 | 5     | 2 | 4 | 4.17  | 1.09  | 0.53  | 0.36 | 0    |       |
| MOL004814 | Isotrifoliol (E)-1-(2,4-dihydroxyphenyl)-3-(2,2-dimethylchromen-6-yl)prop-2-en-1-one              | 298.26 | 2.99  | 2 | 6 | 31.94 | 0.53  | -0.25 | 0.42 | 0    | 7.91  |
| MOL004815 | (2R)-1-[2,4-dihydroxy-5-(3-methylbut-2-enyl)phenyl]-                                              | 322.38 | 3.96  | 2 | 4 | 39.62 | 0.66  | -0.12 | 0.35 | 0    | 16.16 |
| MOL004816 | 2-hydroxy-3-[4-hydroxy-3-(3-methylbut-2-enyl)phenyl]propan-1-one                                  | 410.55 | 5.96  | 4 | 5 | 1.06  | 0.33  | -0.35 | 0.48 | 0    |       |
| MOL004817 | kanzonols K                                                                                       | 436.54 | 5.76  | 3 | 6 | 0.97  | 0.76  | 0.05  | 0.66 | 0    |       |
| MOL004818 | kanzonols L                                                                                       | 490.64 | 7.04  | 3 | 6 | 0.98  | 0.7   | 0.11  | 0.78 | 0    |       |
| MOL004819 | kanzonols T                                                                                       | 440.53 | 4.41  | 5 | 7 | 17.87 | 0.05  | -0.66 | 0.67 | 0    |       |
| MOL004820 | kanzonols W                                                                                       | 336.36 | 3.63  | 2 | 5 | 50.48 | 0.63  | 0.04  | 0.52 | 0    | 0.15  |
| MOL004821 | kanzonols X (E)-1-(2,4-dihydroxyphenyl)-3-[4-hydroxy-3-(3-methylbut-2-enyl)phenyl]prop-2-en-1-one | 394.55 | 6.61  | 3 | 4 | 7.56  | 1.1   | 0.34  | 0.56 | 0    |       |
| MOL004822 | hydroxy-3-(3-methylbut-2-enyl)phenyl]prop-2-en-1-one                                              | 324.4  | 4.76  | 3 | 4 | 1.04  | 0.55  | -0.22 | 0.27 | 0    |       |
| MOL004823 | licoagropin                                                                                       | 320.46 | 5.77  | 0 | 2 | 27.14 | 1.63  | 1.08  | 0.51 | 0    |       |

|           |                                                                                                             |        |       |   |    |       |       |       |      |      |       |
|-----------|-------------------------------------------------------------------------------------------------------------|--------|-------|---|----|-------|-------|-------|------|------|-------|
| MOL004824 | (2S)-6-(2,4-dihydroxyphenyl)-2-(2-hydroxypropan-2-yl)-4-methoxy-2,3-dihydrofuro[3,2-g]chromen-7-one         | 384.41 | 2.96  | 3 | 7  | 60.25 | 0     | -0.76 | 0.63 | 0    | 4.31  |
| MOL004825 | glyinflanin A                                                                                               | 408.53 | 6.05  | 4 | 5  | 1.06  | 0.69  | 0.03  | 0.48 | 0.38 |       |
| MOL005812 | naringin                                                                                                    | 580.59 | -0.46 | 8 | 14 | 6.92  | -1.99 | -3    | 0.78 | 0.31 |       |
| MOL004827 | Semilicoisoflavone B                                                                                        | 352.36 | 2.85  | 3 | 6  | 48.78 | 0.45  | -0.33 | 0.55 | 0    | 17.02 |
| MOL004828 | Glepidotin A                                                                                                | 338.38 | 3.9   | 3 | 5  | 44.72 | 0.79  | 0.06  | 0.35 | 0    | 16.09 |
| MOL004829 | Glepidotin B                                                                                                | 340.4  | 3.88  | 3 | 5  | 64.46 | 0.46  | -0.09 | 0.34 | 0    | 15.98 |
| MOL004830 | Octadiene                                                                                                   | 110.22 | 3.19  | 0 | 0  | 34.53 | 1.81  | 2.07  | 0.01 | 0    | 3.75  |
| MOL004831 | (E)-1-[2,4-dihydroxy-3-(3-methylbut-2-enyl)phenyl]-3-[4-hydroxy-3-(3-methylbut-2-enyl)phenyl]prop-2-en-1-yl | 392.53 | 6.61  | 3 | 4  | 1.02  | 0.81  | 0.01  | 0.45 | 0.37 |       |
| MOL004832 | WLN: 4OVR                                                                                                   | 178.25 | 3.01  | 0 | 2  | 48.41 | 1.31  | 1.42  | 0.04 | 0    | 7.28  |
| MOL004833 | Phaseolinisoflavan                                                                                          | 324.4  | 3.95  | 2 | 4  | 32.01 | 1.01  | 0.46  | 0.45 | 0    | 2.66  |
| MOL004834 | 3-(2-hydroxy-4-methoxyphenyl)-2H-chromen-7-ol                                                               | 270.3  | 2.96  | 2 | 4  | 4.66  | 0.89  | 0.16  | 0.21 | 0    |       |
| MOL004835 | Glypallichalcone                                                                                            | 284.33 | 3.4   | 1 | 4  | 61.6  | 0.76  | 0.23  | 0.19 | 0    | 17.01 |
| MOL004836 | echinatin                                                                                                   | 270.3  | 3.15  | 2 | 4  | 66.58 | 0.38  | -0.18 | 0.17 | 0    | 19.56 |
| MOL004837 | Karenzu DK2                                                                                                 | 224.27 | 3.16  | 0 | 2  | 62.26 | 0.94  | 0.64  | 0.1  | 0    | 33.72 |
| MOL004838 | 8-(6-hydroxy-2-benzofuranyl)-2,2-dimethyl-5-chromenol                                                       | 308.35 | 4.2   | 2 | 4  | 58.44 | 1     | 0.34  | 0.38 | 0.34 | 8.71  |
| MOL004839 | (1S,2S)-1,2-dimethylcyclopentane                                                                            | 98.21  | 2.79  | 0 | 0  | 41.78 | 1.78  | 2.26  | 0.01 | 0    | 10.93 |
| MOL004840 | Liconeolignan                                                                                               | 354.43 | 5.23  | 2 | 5  | 4.41  | 1     | 0.04  | 0.4  | 0    |       |
| MOL004841 | Licochalcone B                                                                                              | 286.3  | 2.88  | 3 | 5  | 76.76 | 0.47  | -0.46 | 0.19 | 0    | 17.02 |
| MOL004842 | licochalcone C                                                                                              | 338.43 | 5.01  | 2 | 4  | 4.44  | 0.63  | 0.05  | 0.29 | 0    |       |
| MOL004843 | licochalconeD                                                                                               | 354.43 | 4.74  | 3 | 5  | 1.01  | 0.47  | 0.06  | 0.34 | 0    |       |
| MOL004844 | glabrol                                                                                                     | 392.53 | 6.28  | 2 | 4  | 4.25  | 0.84  | 0.06  | 0.54 | 0    |       |
| MOL004845 | apioglycyrrhizin                                                                                            | 779.03 | 2.54  | 7 | 14 | 17.8  | -1.91 | -2.67 | 0.14 | 0    |       |
| MOL004846 | apioglycyrrhizin_qt                                                                                         | 470.76 | 5.49  | 2 | 4  | 23.73 | 0.1   | -0.56 | 0.74 | 0    |       |
| MOL004847 | 2,2-                                                                                                        | 100.23 | 3.11  | 0 | 0  | 55.33 | 1.79  | 2.11  | 0.01 | 0    | 11    |
| MOL004848 | licochalcone G                                                                                              | 354.43 | 4.35  | 3 | 5  | 49.25 | 0.64  | -0.04 | 0.32 | 0.35 | 15.75 |

|           |                                                                                                                                         |        |      |   |    |       |       |       |      |      |       |
|-----------|-----------------------------------------------------------------------------------------------------------------------------------------|--------|------|---|----|-------|-------|-------|------|------|-------|
| MOL004849 | 3-(2,4-dihydroxyphenyl)-8-(1,1-dimethylprop-2-enyl)-7-hydroxy-5-methoxy-coumarin                                                        | 368.41 | 4.03 | 3 | 6  | 59.62 | 0.4   | -0.23 | 0.43 | 0    | 0.69  |
| MOL004850 | liquoric acid                                                                                                                           | 484.74 | 4.05 | 2 | 5  | 25.44 | -0.01 | -0.52 | 0.55 | 0    |       |
| MOL004851 | Licoflavone                                                                                                                             | 322.38 | 4.46 | 2 | 4  | 18.75 | 0.82  | -0.31 | 0.33 | 0    |       |
| MOL004852 | 7-hydroxy-2-[4-hydroxy-3-(3-methylbut-2-enyl)phenyl]-6-(3-methylbut-2-enyl)chromone                                                     | 390.51 | 6.32 | 2 | 4  | 4.44  | 0.88  | -0.17 | 0.56 | 0    |       |
| MOL004853 | Licoflavonol                                                                                                                            | 354.38 | 3.63 | 4 | 6  | 8.75  | 0.49  | -0.3  | 0.4  | 0    |       |
| MOL004385 | Yinyanghuo D                                                                                                                            | 338.38 | 4.19 | 3 | 5  | 13.99 | 0.61  | -0.53 | 0.38 | 0    |       |
| MOL004855 | Licoricone                                                                                                                              | 382.44 | 4.16 | 2 | 6  | 63.58 | 0.53  | -0.14 | 0.47 | 0    | 16.37 |
| MOL004856 | Gancaonin A                                                                                                                             | 352.41 | 4.17 | 2 | 5  | 51.08 | 0.8   | 0.13  | 0.4  | 0    | 16.82 |
| MOL004857 | Gancaonin B                                                                                                                             | 368.41 | 3.91 | 3 | 6  | 48.79 | 0.58  | -0.1  | 0.45 | 0    | 16.49 |
| MOL004858 | Gancaonin C                                                                                                                             | 354.38 | 2.83 | 4 | 6  | 2.87  | 0.14  | -0.87 | 0.42 | 0    |       |
| MOL004859 | 2,3-dimethylhexane                                                                                                                      | 114.26 | 3.61 | 0 | 0  | 46.24 | 1.78  | 2.16  | 0.01 | 0    | 11.01 |
| MOL000486 | Prunetin                                                                                                                                | 284.28 | 2.32 | 2 | 5  | 5.41  | 0.65  | -0.25 | 0.24 | 0    |       |
| MOL004860 | licorice glycoside E                                                                                                                    | 693.71 | 1.59 | 7 | 14 | 32.89 | -2.06 | -2.8  | 0.27 | 0.31 | 25.39 |
| MOL004861 | Gancaonin D                                                                                                                             | 384.41 | 2.81 | 4 | 7  | 2.72  | -0.11 | -0.93 | 0.51 | 0    |       |
| MOL004862 | (2R)-2-[3,4-dihydroxy-5-(3-methylbut-2-enyl)phenyl]-5,7-dihydroxy-8-(3-methylbut-2-enyl)chroman-4-one                                   | 424.53 | 5.74 | 4 | 6  | 1.21  | 0.51  | -0.35 | 0.63 | 0    |       |
| MOL004863 | 3-(3,4-dihydroxyphenyl)-5,7-dihydroxy-8-(3-methylbut-2-enyl)chromone                                                                    | 354.38 | 3.65 | 4 | 6  | 66.37 | 0.52  | -0.13 | 0.41 | 0    | 15.81 |
| MOL004864 | 5,7-dihydroxy-3-(4-methoxyphenyl)-8-(3-methylbut-2-enyl)chromone                                                                        | 352.41 | 4.17 | 2 | 5  | 30.49 | 0.9   | 0.21  | 0.41 | 0    | 14.99 |
| MOL004865 | 5,7-dihydroxy-3-(2-hydroxy-4-methoxyphenyl)-6-(3-methylbut-2-enyl)-2-(3,4-dihydroxyphenyl)-5,7-dihydroxy-6-(3-methylbut-2-enyl)chromone | 368.41 | 3.91 | 3 | 6  | 2.47  | 0.58  | -0.14 | 0.45 | 0    |       |
| MOL004866 | 5,7-dihydroxy-6-(3-methylbut-2-enyl)chromone                                                                                            | 354.38 | 3.92 | 4 | 6  | 44.15 | 0.48  | -0.28 | 0.41 | 0    | 16.77 |
| MOL004867 | Gancaonin P                                                                                                                             | 370.38 | 3.36 | 5 | 7  | 1.41  | 0.27  | -0.4  | 0.45 | 0    |       |
| MOL004868 | Gancaonin Q                                                                                                                             | 406.51 | 6.05 | 3 | 5  | 8.98  | 0.86  | -0.01 | 0.6  | 0    |       |
| MOL004869 | Gancaonin R                                                                                                                             | 382.54 | 6.9  | 4 | 4  | 1.26  | 1.03  | 0.25  | 0.37 | 0    |       |
| MOL004870 | Gancaonin S                                                                                                                             | 382.54 | 6.9  | 4 | 4  | 1.26  | 0.98  | 0.18  | 0.38 | 0    |       |
| MOL004871 | (3S)-2,3-dimethylpentane                                                                                                                | 100.23 | 3.16 | 0 | 0  | 35.57 | 1.78  | 2.23  | 0.01 | 0    | 11.19 |

|           |                                                                                      |        |      |    |    |       |       |       |      |      |       |
|-----------|--------------------------------------------------------------------------------------|--------|------|----|----|-------|-------|-------|------|------|-------|
| MOL004872 | gancaonin T                                                                          | 398.54 | 5.45 | 4  | 5  | 1.04  | 0.5   | -0.43 | 0.53 | 0    |       |
| MOL004873 | Gancaonin U                                                                          | 380.52 | 6.59 | 4  | 4  | 14.53 | 1.08  | 0.6   | 0.53 | 0    |       |
| MOL004874 | Gancaonin V                                                                          | 312.39 | 4.74 | 4  | 4  | 1.24  | 0.73  | 0.04  | 0.34 | 0    |       |
| MOL004875 | 3-[4,6-dihydroxy-2-methoxy-3-(3-methylbut-2-enyl)phenyl]-7-hydroxy-chromone          | 368.41 | 3.91 | 3  | 6  | 2.47  | 0.43  | -0.3  | 0.44 | 0    |       |
| MOL004876 | Glycyram                                                                             | 823.04 | 2.42 | 8  | 16 | 19.62 | -2.66 | -2.86 | 0.11 | 0    |       |
| MOL004877 | Licoricidin                                                                          | 424.58 | 6.59 | 3  | 5  | 0.99  | 0.96  | 0.3   | 0.62 | 0    |       |
| MOL004878 | Glycycoumarin                                                                        | 368.41 | 4.42 | 3  | 6  | 23.56 | 0.52  | -0.24 | 0.44 | 0    |       |
| MOL004879 | Glycyrin                                                                             | 382.44 | 4.67 | 2  | 6  | 52.61 | 0.59  | -0.13 | 0.47 | 0    | 1.31  |
| MOL004880 | 5,6,7,8-Tetrahydro-2,4-dimethylquinoline                                             | 161.27 | 2.97 | 0  | 1  | 49.77 | 1.64  | 1.7   | 0.05 | 0    | -2.84 |
| MOL004881 | (E)-1-[2,4-dihydroxy-3-(3-methylbut-2-enyl)phenyl]-3-(2,4-dihydroxyphenyl)prop-2-en- | 340.4  | 4.49 | 4  | 5  | 1.36  | 0.5   | -0.22 | 0.3  | 0.38 |       |
| MOL004882 | Licocoumarone                                                                        | 340.4  | 4.98 | 3  | 5  | 33.21 | 0.84  | 0.06  | 0.36 | 0    | 9.66  |
| MOL004883 | Licoisoflavone                                                                       | 354.38 | 3.65 | 4  | 6  | 41.61 | 0.37  | -0.27 | 0.42 | 0    | 16.09 |
| MOL004884 | Licoisoflavone B                                                                     | 352.36 | 2.85 | 3  | 6  | 38.93 | 0.46  | -0.18 | 0.55 | 0    | 15.73 |
| MOL004885 | licoisoflavanone                                                                     | 354.38 | 2.97 | 3  | 6  | 52.47 | 0.39  | -0.22 | 0.54 | 0    | 15.67 |
| MOL004886 | licorice-saponin C2                                                                  | 807.04 | 3.1  | 8  | 15 | 59.66 | -2.28 | -2.89 | 0.11 | 0    | 3.56  |
| MOL004887 | licorice-saponin C2_qt                                                               | 454.76 | 6.17 | 2  | 3  | 17.33 | 0.48  | -0.3  | 0.76 | 0    |       |
| MOL004888 | licorice-saponin F3                                                                  | 983.18 | 1.32 | 10 | 21 | 17.68 | -2.82 | -3.47 | 0.03 | 0    |       |
| MOL004889 | licorice-saponin F3_qt                                                               | 454.76 | 5.93 | 1  | 3  | 27.53 | 0.74  | 0.07  | 0.64 | 0    |       |
| MOL004890 | (4S)-2,4-dimethylhexane                                                              | 114.26 | 3.61 | 0  | 0  | 37.13 | 1.77  | 2.19  | 0.01 | 0    | 10.95 |
| MOL004891 | shinpterocarpin                                                                      | 322.38 | 3.46 | 1  | 4  | 80.3  | 1.1   | 0.68  | 0.73 | 0.32 | 6.5   |
| MOL004892 | licorice-saponin G2                                                                  | 839.04 | 1.33 | 9  | 17 | 6.39  | -2.01 | -2.84 | 0.11 | 0    |       |
| MOL004893 | licorice-saponin G2_qt                                                               | 486.76 | 4.4  | 3  | 5  | 22.78 | -0.27 | -0.74 | 0.72 | 0    |       |
| MOL004894 | licorice-saponin H2                                                                  | 823.04 | 2.42 | 8  | 16 | 44.37 | -2.08 | -2.83 | 0.11 | 0    | 5.09  |
| MOL004895 | licorice-saponin H2_qt                                                               | 470.76 | 5.49 | 2  | 4  | 22.91 | 0.01  | -0.48 | 0.74 | 0    |       |
| MOL004896 | licorice-saponin J2                                                                  | 825.06 | 2.26 | 9  | 16 | 6.25  | -2.25 | -2.84 | 0.11 | 0    |       |
| MOL004897 | licorice-saponin J2_qt                                                               | 472.78 | 5.33 | 3  | 4  | 28.3  | 0.04  | -0.82 | 0.74 | 0    |       |
| MOL004898 | (E)-3-[3,4-dihydroxy-5-(3-methylbut-2-enyl)phenyl]-1-(2,4-dihydroxyphenyl)prop-2-en- | 340.4  | 4.49 | 4  | 5  | 46.27 | 0.41  | -0.4  | 0.31 | 0.43 | 15.24 |
| MOL004899 | licorice-saponin B2                                                                  | 809.06 | 3.35 | 8  | 15 | 58.55 | -2.4  | -2.96 | 0.11 | 0.3  | 4.24  |
| MOL004900 | licorice-saponin K2                                                                  | 823.04 | 2.01 | 9  | 16 | 7.82  | -2.64 | -3.25 | 0.11 | 0    |       |
| MOL004901 | licorice-saponin K2_qt                                                               | 470.76 | 5.08 | 3  | 4  | 27.79 | 0.05  | -0.67 | 0.75 | 0    |       |
| MOL004902 | glycyrrhetol                                                                         | 456.78 | 5.28 | 2  | 3  | 14.66 | 0.36  | -0.26 | 0.75 | 0    |       |
| MOL004903 | liquiritin                                                                           | 418.43 | 0.66 | 5  | 9  | 65.69 | -1.06 | -1.93 | 0.74 | 0    | 17.96 |

GanCao

|           |                                                                                                                |        |       |    |    |       |       |       |      |      |       |
|-----------|----------------------------------------------------------------------------------------------------------------|--------|-------|----|----|-------|-------|-------|------|------|-------|
| MOL004904 | licopyranocoumarin                                                                                             | 384.41 | 3.04  | 3  | 7  | 80.36 | 0.13  | -0.62 | 0.65 | 0    | 0.08  |
| MOL004905 | 3,22-Dihydroxy-11-oxo-<br>delta(12)-oleanene-27-<br>alpha-methoxycarbonyl-29-<br>oic acid                      | 512.75 | 4.37  | 1  | 6  | 34.32 | -0.06 | -0.75 | 0.55 | 0    | 3.56  |
| MOL004906 | Hispaglabridin B                                                                                               | 390.51 | 5     | 1  | 4  | 22.94 | 1.18  | 0.62  | 0.88 | 0.31 |       |
| MOL004907 | Glyzaglabrin                                                                                                   | 298.26 | 2.1   | 2  | 6  | 61.07 | 0.34  | -0.2  | 0.35 | 0    | 21.2  |
| MOL004908 | Glabridin                                                                                                      | 324.4  | 3.95  | 2  | 4  | 53.25 | 0.97  | 0.36  | 0.47 | 0    | 0.03  |
| MOL004909 | glabrolide                                                                                                     | 468.74 | 5     | 1  | 4  | 17.46 | 0.29  | -0.48 | 0.61 | 0    |       |
| MOL004910 | Glabranin                                                                                                      | 324.4  | 4.42  | 2  | 4  | 52.9  | 0.97  | 0.31  | 0.31 | 0    | 16.24 |
| MOL004911 | Glabrene                                                                                                       | 322.38 | 3.77  | 2  | 4  | 46.27 | 0.99  | 0.04  | 0.44 | 0    | 3.63  |
| MOL004912 | Glabrone                                                                                                       | 336.36 | 3.12  | 2  | 5  | 52.51 | 0.59  | -0.11 | 0.5  | 0    | 16.09 |
| MOL004913 | 1,3-dihydroxy-9-methoxy-<br>6-benzofurano[3,2-<br>c]chromenone                                                 | 298.26 | 2.99  | 2  | 6  | 48.14 | 0.48  | -0.19 | 0.43 | 0    | 8.87  |
| MOL004914 | 1,3-dihydroxy-8,9-<br>dimethoxy-6-<br>benzofurano[3,2-<br>c]chromenone                                         | 328.29 | 2.98  | 2  | 7  | 62.9  | 0.4   | -0.34 | 0.53 | 0    | 9.32  |
| MOL004915 | Eurycarpin A                                                                                                   | 338.38 | 3.92  | 3  | 5  | 43.28 | 0.43  | -0.06 | 0.37 | 0    | 17.1  |
| MOL004916 | 2-methyl-5-propyl -nonane                                                                                      | 184.41 | 5.89  | 0  | 0  | 15.28 | 1.81  | 2.03  | 0.03 | 0    |       |
| MOL004917 | glycyroside                                                                                                    | 562.57 | -0.73 | 6  | 13 | 37.25 | -1.58 | -2.56 | 0.79 | 0    | 14.62 |
| MOL004918 | HEX                                                                                                            | 86.2   | 3.11  | 0  | 0  | 52.5  | 1.78  | 2.14  | 0    | 0    | 10.8  |
| MOL004919 | Sextone B                                                                                                      | 98.21  | 2.99  | 0  | 0  | 56.2  | 1.77  | 2.14  | 0.01 | 0    | 10.85 |
| MOL004920 | Methylcyclopentane                                                                                             | 84.18  | 2.53  | 0  | 0  | 55.78 | 1.79  | 2.22  | 0.01 | 0    | 10.97 |
| MOL004921 | Docosyl caffeate                                                                                               | 488.83 | 11.16 | 2  | 4  | 3.14  | 1.01  | 0.31  | 0.59 | 0    |       |
| MOL004922 | 2-methyl-6-ethyl decane                                                                                        | 184.41 | 5.89  | 0  | 0  | 5.5   | 1.81  | 2     | 0.03 | 0    |       |
| MOL000391 | Ononin                                                                                                         | 430.44 | 0.68  | 4  | 9  | 11.52 | -0.74 | -1.67 | 0.78 | 0    |       |
| MOL004924 | (-)-Medicocarpin                                                                                               | 432.46 | 0.75  | 4  | 9  | 40.99 | -0.6  | -1.34 | 0.95 | 0    | 13.2  |
| MOL004925 | vitexin                                                                                                        | 432.41 | -0.06 | 7  | 10 | 3.05  | -1.52 | -2.41 | 0.71 | 0    |       |
| MOL004926 | 4H-1-Benzopyran-4-one, 2-<br>(4-(beta-D-<br>glucopyranosyloxy)phenyl)-<br>2,3-dihydro-5,7-dihydroxy-,<br>(2S)- | 434.43 | 0.39  | 6  | 10 | 14.03 | -1.13 | -2.08 | 0.78 | 0    |       |
| MOL004927 | Hispaglabridin A                                                                                               | 392.53 | 5.81  | 2  | 4  | 14.6  | 1.12  | 0.43  | 0.73 | 0    |       |
| MOL004928 | violanthin                                                                                                     | 578.57 | -1.56 | 10 | 14 | 4.17  | -2.01 | -2.77 | 0.81 | 0    |       |
| MOL004929 | Pentadecanol                                                                                                   | 228.47 | 5.99  | 1  | 1  | 13.73 | 1.3   | 1.06  | 0.06 | 0    |       |
| MOL004930 | Uralenol                                                                                                       | 370.38 | 3.36  | 5  | 7  | 8.55  | 0.35  | -0.57 | 0.46 | 0    |       |
| MOL004931 | Uralenol-3-methylether                                                                                         | 384.41 | 3.43  | 4  | 7  | 1.41  | 0.39  | -0.62 | 0.49 | 0    |       |
| MOL004932 | glycyrrhizin                                                                                                   | 823.04 | 2.42  | 8  | 16 | 9.06  | -2.23 | -3.13 | 0.11 | 0    |       |
| MOL004933 | uralsaponin B                                                                                                  | 823.04 | 2.42  | 8  | 16 | 7.92  | -2.6  | -3.17 | 0.11 | 0    |       |

|           |                                                                                              |        |       |    |    |       |       |       |      |      |       |
|-----------|----------------------------------------------------------------------------------------------|--------|-------|----|----|-------|-------|-------|------|------|-------|
| MOL004934 | Isohexane                                                                                    | 86.2   | 2.9   | 0  | 0  | 56.13 | 1.77  | 2.08  | 0    | 0    | 11.03 |
| MOL004935 | Sigmoidin-B                                                                                  | 356.4  | 3.89  | 4  | 6  | 34.88 | 0.42  | -0.41 | 0.41 | 0    | 14.49 |
| MOL004936 | Uralene                                                                                      | 384.41 | 3.43  | 4  | 7  | 11.7  | 0.63  | -0.22 | 0.49 | 0    |       |
| MOL004937 | uralenneoside                                                                                | 286.26 | -0.49 | 5  | 8  | 24.96 | -1.01 | -1.61 | 0.17 | 0    |       |
| MOL004938 | schaftoside                                                                                  | 596.54 | -1.5  | 10 | 16 | 7.88  | -2.46 | -3.48 | 0.75 | 0    |       |
| MOL004939 | Nortangeretin                                                                                | 302.25 | 1.8   | 5  | 7  | 17.9  | 0.24  | -0.68 | 0.27 | 0    |       |
| MOL004940 | neoliquiritin                                                                                | 418.43 | 0.66  | 5  | 9  | 13.01 | -1.08 | -1.95 | 0.71 | 0    |       |
| MOL004941 | (2R)-7-hydroxy-2-(4-hydroxyphenyl)chroman-4-one                                              | 256.27 | 2.57  | 2  | 4  | 71.12 | 0.41  | -0.25 | 0.18 | 0    | 18.09 |
| MOL004942 | (E)-dodec-2-ene                                                                              | 168.36 | 5.4   | 0  | 0  | 17.74 | 1.83  | 2     | 0.02 | 0    |       |
| MOL004943 | neoisoliquiritin                                                                             | 418.43 | 1     | 6  | 9  | 21.18 | -1.41 | -2.05 | 0.58 | 0    |       |
| MOL004944 | Cyclobutanol, 1-ethyl-(2S)-7-hydroxy-2-(4-hydroxyphenyl)-8-(3-methylbut-2-enyl)chroman-4-one | 100.18 | 1.32  | 1  | 1  | 93.23 | 1.13  | 1.35  | 0.02 | 0    | 11.08 |
| MOL004945 |                                                                                              | 324.4  | 4.42  | 2  | 4  | 36.57 | 0.72  | -0.04 | 0.32 | 0    | 17.95 |
| MOL004946 | 2-Tetradecanone                                                                              | 212.42 | 4.99  | 0  | 1  | 17.71 | 1.46  | 1.6   | 0.05 | 0    |       |
| MOL004947 | Isoviolanthin                                                                                | 578.57 | -1.56 | 10 | 14 | 18.79 | -2.43 | -3.14 | 0.81 | 0    |       |
| MOL004948 | Isoglycyrol                                                                                  | 366.39 | 4.36  | 1  | 6  | 44.7  | 0.91  | 0.05  | 0.84 | 0    | 6.69  |
| MOL004949 | Isolicoflavonol                                                                              | 354.38 | 3.63  | 4  | 6  | 45.17 | 0.54  | -0.42 | 0.42 | 0    | 15.55 |
| MOL004950 | isoglycycoumarin                                                                             | 368.41 | 3.92  | 2  | 6  | 22.09 | 0.55  | -0.16 | 0.6  | 0    |       |
| MOL004951 | Isoliquiritin                                                                                | 418.43 | 1     | 6  | 9  | 8.61  | -1.36 | -1.93 | 0.6  | 0    |       |
| MOL004952 | licuraside                                                                                   | 550.56 | -0.41 | 8  | 13 | 5.25  | -1.92 | -3    | 0.77 | 0    |       |
| MOL004953 | Liquiritin apioside                                                                          | 550.56 | -0.75 | 7  | 13 | 29.23 | -1.88 | -2.69 | 0.82 | 0.31 |       |
| MOL004954 | isograbrol                                                                                   | 392.53 | 6.28  | 2  | 4  | 11.04 | 0.87  | -0.07 | 0.5  | 0    |       |
| MOL004955 | isoglabrolide                                                                                | 468.74 | 5.15  | 1  | 4  | 14.77 | 0.32  | -0.16 | 0.62 | 0    |       |
| MOL004956 | Isoononin                                                                                    | 430.44 | 0.68  | 4  | 9  | 8.29  | -1    | -1.57 | 0.79 | 0    |       |
| MOL004957 | HMO                                                                                          | 268.28 | 2.58  | 1  | 4  | 38.37 | 0.79  | 0.25  | 0.21 | 0    | 16.56 |
| MOL004958 | Isoschaftoside                                                                               | 564.54 | -1.94 | 10 | 14 | 17.38 | -2.62 | -3.36 | 0.83 | 0    |       |
| MOL004959 | 1-Methoxyphaseollidin                                                                        | 354.43 | 4.25  | 2  | 5  | 69.98 | 1.01  | 0.48  | 0.64 | 0    | 9.53  |
| MOL004960 | 22尾-acetylglabric acid                                                                       | 528.8  | 4.77  | 2  | 6  | 17.76 | -0.21 | -0.98 | 0.64 | 0    |       |
| MOL004961 | Quercetin der.                                                                               | 330.31 | 1.82  | 3  | 7  | 46.45 | 0.39  | -0.44 | 0.33 | 0    | 16.61 |
| MOL004962 | 24-Hydroxy-11-deoxyglycyrrhetic acid                                                         | 458.75 | 5.13  | 3  | 4  | 17.57 | 0.26  | -0.36 | 0.76 | 0    |       |
| MOL004963 | 24-Hydroxyglycyrrhetic acid                                                                  | 486.76 | 4.4   | 3  | 5  | 24.17 | -0.1  | -0.8  | 0.72 | 0    |       |
| MOL004964 | (Z)-1-(2,4-dihydroxyphenyl)-3-phenylprop-2-en-1-one                                          | 240.27 | 3.17  | 2  | 3  | 73.18 | 0.57  | 0.14  | 0.12 | 0    | 20.35 |
| MOL004965 | 3'(纬,纬-dimethylallyl)-kievitone                                                              | 424.53 | 5.63  | 4  | 6  | 1.21  | 0.51  | -0.15 | 0.63 | 0    |       |

|           |                                                                                |        |       |   |   |       |       |       |      |      |       |
|-----------|--------------------------------------------------------------------------------|--------|-------|---|---|-------|-------|-------|------|------|-------|
| MOL004966 | 3'-Hydroxy-4'-O-Methylglabridin                                                | 354.43 | 3.93  | 2 | 5 | 43.71 | 1     | 0.73  | 0.57 | 0    | -0.61 |
| MOL004967 | 3,3-Dimethylpentane                                                            | 100.23 | 3.11  | 0 | 0 | 41.97 | 1.75  | 2.1   | 0.01 | 0    | 11.09 |
| MOL004968 | 3,4,3',4'-Tetrahydroxy-2-methoxychalcone                                       | 288.32 | 3.19  | 4 | 5 | 1.33  | 0.64  | 0.01  | 0.2  | 0    |       |
| MOL004969 | 2-Ethyl-p-xylene                                                               | 134.24 | 3.75  | 0 | 0 | 20.6  | 1.89  | 2.03  | 0.02 | 0    |       |
| MOL000497 | licochalcone a                                                                 | 338.43 | 4.62  | 2 | 4 | 40.79 | 0.82  | -0.21 | 0.29 | 0    | 16.2  |
| MOL004970 | 3-methylheptane                                                                | 114.26 | 3.82  | 0 | 0 | 36.61 | 1.79  | 2.16  | 0.01 | 0    | 10.56 |
| MOL004971 | 3-methylhexane                                                                 | 100.23 | 3.36  | 0 | 0 | 38.19 | 1.78  | 2.15  | 0.01 | 0    | 10.9  |
| MOL004972 | 3-Methylpentane                                                                | 86.2   | 2.9   | 0 | 0 | 35.77 | 1.76  | 2.14  | 0    | 0    | 11.1  |
| MOL004973 | 3-Ethylpentane                                                                 | 100.23 | 3.36  | 0 | 0 | 35.74 | 1.79  | 2.16  | 0.01 | 0    | 11.5  |
| MOL004974 | 3'-Methoxyglabridin                                                            | 354.43 | 3.93  | 2 | 5 | 46.16 | 0.94  | 0.47  | 0.57 | 0    | 0.52  |
| MOL004975 | 3尾-formylglabrolide                                                            | 496.75 | 5.33  | 0 | 5 | 16.36 | 0.26  | -0.5  | 0.55 | 0    |       |
| MOL004976 | Daidzein dimethyl ether                                                        | 282.31 | 2.83  | 0 | 4 | 24.29 | 0.98  | 0.17  | 0.24 | 0    |       |
| MOL004977 | 1-Methoxyficifolinol                                                           | 422.56 | 6.1   | 2 | 5 | 14.61 | 1.09  | 0.2   | 0.86 | 0    |       |
| MOL004978 | 2-[(3R)-8,8-dimethyl-3,4-dihydro-2H-pyrano[6,5-f]chromen-3-yl]-5-methoxyphenol | 338.43 | 4.2   | 1 | 4 | 36.21 | 1.12  | 0.61  | 0.52 | 0    | -0.13 |
| MOL004979 | Tetrahydroxydihydrochalcone                                                    | 274.29 | 2.24  | 4 | 5 | 2.45  | 0.1   | -0.4  | 0.16 | 0    |       |
| MOL004980 | Inflacoumarin A                                                                | 322.38 | 4.7   | 2 | 4 | 39.71 | 0.73  | -0.24 | 0.33 | 0    | 2.31  |
| MOL004981 | 1-(5-hydroxy-2,2-dimethylchromen-6-yl)-3-(4-hydroxyphenyl)prop-2-en-1-one      | 322.38 | 3.96  | 2 | 4 | 5.2   | 0.86  | -0.01 | 0.34 | 0    |       |
| MOL004982 | 2,6,10-trimethyl-dodecane                                                      | 144.14 | -1.02 | 2 | 4 | 37.8  | 0.08  | 0.04  | 0.03 | 0    | 11.49 |
| MOL004983 | 5,6,7,8-Tetrahydro-4-methylquinoline                                           | 147.24 | 2.69  | 0 | 1 | 59.18 | 1.63  | 1.79  | 0.04 | 0    | 11.39 |
| MOL005015 | Licoriisoflavan A                                                              | 438.61 | 6.84  | 2 | 5 | 3.68  | 1.1   | 0.28  | 0.66 | 0    |       |
| MOL004985 | icos-5-enoic acid                                                              | 310.58 | 7.75  | 1 | 2 | 30.7  | 1.22  | 1.09  | 0.2  | 0    | 5.28  |
| MOL004986 | 6'' -O-acetyllicuritin                                                         | 444.47 | 2.33  | 3 | 9 | 6.26  | -0.48 | -1.24 | 0.82 | 0    |       |
| MOL004987 | 11-deoxyglycyrrhetic acid                                                      | 456.78 | 6.42  | 2 | 3 | 16.21 | 0.51  | -0.22 | 0.76 | 0    |       |
| MOL004988 | Kanzonol F                                                                     | 420.54 | 5.3   | 1 | 5 | 32.47 | 1.18  | 0.56  | 0.89 | 0.28 | 9.98  |
| MOL004989 | 6-prenylated eriodictyol                                                       | 356.4  | 3.89  | 4 | 6 | 39.22 | 0.4   | -0.29 | 0.41 | 0    | 16.52 |
| MOL004990 | 7,2',4'-trihydroxy-5-methoxy-3-aryl coumarin                                   | 300.28 | 2.56  | 3 | 6 | 83.71 | 0.24  | -0.59 | 0.27 | 0    | 0.99  |
| MOL004991 | 7-Acetoxy-2-methylisoflavone                                                   | 294.32 | 3.15  | 0 | 4 | 38.92 | 0.74  | 0.16  | 0.26 | 0    | 17.49 |
| MOL004992 | 7-hydroxy-2-methyl-3-phenyl-chromone                                           | 252.28 | 3.11  | 1 | 3 | 25.8  | 1     | 0.4   | 0.18 | 0    |       |



|           |                                                                        |        |       |   |    |       |       |       |      |      |       |
|-----------|------------------------------------------------------------------------|--------|-------|---|----|-------|-------|-------|------|------|-------|
| MOL004993 | 8-prenylated eriodictyol                                               | 356.4  | 3.89  | 4 | 6  | 53.79 | 0.43  | -0.44 | 0.4  | 0    | 15.7  |
| MOL004994 | 12-methyltetradecanoate                                                | 256.48 | 5.96  | 0 | 2  | 17.36 | 1.35  | 1.15  | 0.09 | 0    |       |
| MOL004995 | Kanzonol H                                                             | 424.58 | 6.1   | 2 | 5  | 16.92 | 0.96  | 0.38  | 0.8  | 0.27 |       |
| MOL004996 | gadelaidic acid                                                        | 310.58 | 7.75  | 1 | 2  | 30.7  | 1.2   | 0.94  | 0.2  | 0    | 5.25  |
| MOL004997 | Araboglycyrrhizin                                                      | 779.03 | 2.72  | 7 | 14 | 17.73 | -2.46 | -2.73 | 0.14 | 0    |       |
| MOL004998 | Araboglycyrrhizin_qt                                                   | 470.76 | 5.49  | 2 | 4  | 17.71 | 0.11  | -0.52 | 0.74 | 0    |       |
| MOL004999 | Artonin E                                                              | 436.49 | 4.67  | 4 | 7  | 11.38 | 0.34  | -0.33 | 0.8  | 0    |       |
| MOL000500 | Vestitol                                                               | 272.32 | 3.15  | 2 | 4  | 74.66 | 0.86  | 0.3   | 0.21 | 0    | 3     |
| MOL005000 | Gancaonin G                                                            | 352.41 | 4.17  | 2 | 5  | 60.44 | 0.78  | 0.23  | 0.39 | 0    | 16.13 |
| MOL005001 | Gancaonin H                                                            | 420.49 | 4.71  | 3 | 6  | 50.1  | 0.6   | -0.14 | 0.78 | 0    | 16.64 |
| MOL005002 | beta-Glycyrrhetic acid                                                 | 470.76 | 5.49  | 2 | 4  | 17.41 | 0.19  | -0.4  | 0.74 | 0    |       |
| MOL005003 | Licoagrocarpin                                                         | 338.43 | 4.51  | 1 | 4  | 58.81 | 1.23  | 0.61  | 0.58 | 0.27 | 9.45  |
| MOL005004 | Gancaonin I                                                            | 354.43 | 5.23  | 2 | 5  | 21.9  | 0.93  | 0.37  | 0.39 | 0    |       |
| MOL005005 | Glyasperin A                                                           | 422.51 | 5.48  | 4 | 6  | 2.46  | 0.6   | -0.26 | 0.63 | 0    |       |
| MOL005006 | Glyasperins K                                                          | 368.46 | 4.54  | 1 | 5  | 10.15 | 0.74  | 0.22  | 0.44 | 0    |       |
| MOL005007 | Glyasperins M                                                          | 368.41 | 3.22  | 2 | 6  | 72.67 | 0.49  | -0.04 | 0.59 | 0    | 15.57 |
| MOL005008 | Glycyrrhiza flavonol A                                                 | 370.38 | 2.17  | 4 | 7  | 41.28 | -0.09 | -0.81 | 0.6  | 0    | 13.71 |
| MOL005009 | Corylifolinin                                                          | 324.4  | 4.76  | 3 | 4  | 1.04  | 0.81  | -0.03 | 0.27 | 0    |       |
| MOL005010 | Kanzonol E                                                             | 388.49 | 5.51  | 1 | 4  | 5.77  | 0.98  | 0.06  | 0.71 | 0    |       |
| MOL005011 | Kanzonol Z                                                             | 406.51 | 4.93  | 2 | 5  | 21.77 | 0.5   | -0.18 | 0.76 | 0    |       |
| MOL005012 | Licoagroisoflavone                                                     | 336.36 | 3.48  | 2 | 5  | 57.28 | 0.71  | 0.09  | 0.49 | 0    | 19.64 |
| MOL005013 | 18 <sup>伪</sup> -hydroxyglycyrrhetic acid                              | 486.76 | 4.55  | 3 | 5  | 41.16 | -0.29 | -0.78 | 0.71 | 0    | 4.96  |
| MOL005014 | Licorice glycoside A                                                   | 726.74 | 1.81  | 8 | 16 | 5.95  | -2.37 | -3.26 | 0.35 | 0.32 |       |
| MOL005016 | Odoratin                                                               | 314.31 | 2.3   | 2 | 6  | 49.95 | 0.42  | -0.24 | 0.3  | 0    | 16.35 |
| MOL005017 | Phaseol                                                                | 336.36 | 4.87  | 2 | 5  | 78.77 | 0.76  | -0.06 | 0.58 | 0    | 9.64  |
| MOL005018 | Xambioona                                                              | 388.49 | 4.68  | 0 | 4  | 54.85 | 1.09  | 0.52  | 0.87 | 0    | 14.5  |
| MOL005019 | (2R)-7-hydroxy-2-[4-hydroxy-3-(3-methylbut-2-enyl)phenyl]chroman-4-one | 324.4  | 4.42  | 2 | 4  | 5.99  | 0.74  | -0.06 | 0.33 | 0    |       |
| MOL005020 | dehydroglyasperins C                                                   | 340.4  | 4.3   | 4 | 5  | 53.82 | 0.68  | -0.12 | 0.37 | 0    | 2.75  |
| MOL005021 | Mipax                                                                  | 194.2  | 1.54  | 0 | 4  | 57.4  | 0.64  | 0.63  | 0.06 | 0    | 5.56  |
| MOL000511 | ursolic acid                                                           | 456.78 | 6.47  | 2 | 3  | 16.77 | 0.67  | 0.07  | 0.75 | 0.26 |       |
| MOL000561 | Astragalin                                                             | 448.41 | -0.32 | 7 | 11 | 14.03 | -1.34 | -1.97 | 0.74 | 0.34 |       |
| MOL000057 | DIBP                                                                   | 278.38 | 3.92  | 0 | 4  | 49.63 | 0.85  | 0.68  | 0.13 | 0    | 3.94  |
| MOL000668 | PENTYLFURAN                                                            | 138.23 | 3.12  | 0 | 1  | 54.59 | 1.72  | 1.94  | 0.02 | 0.1  | -1.96 |
| MOL000671 | (-)-Menthol                                                            | 156.3  | 2.78  | 1 | 1  | 59.33 | 1.27  | 1.42  | 0.03 | 0.22 | 11.03 |
| MOL000676 | DBP                                                                    | 278.38 | 4.2   | 0 | 4  | 64.54 | 0.8   | 0.56  | 0.13 | 0.34 | 5.41  |
| MOL000703 | 2-heptanone                                                            | 114.21 | 1.79  | 0 | 1  | 46.56 | 1.31  | 1.57  | 0.01 | 0.25 | 10.58 |
| MOL000705 | WLN: VH6                                                               | 114.21 | 2.31  | 0 | 1  | 19.59 | 1.29  | 1.49  | 0.01 | 0.23 |       |
| MOL000098 | quercetin                                                              | 302.25 | 1.5   | 5 | 7  | 46.43 | 0.05  | -0.77 | 0.28 | 0.38 | 14.4  |

| Detailed Information of 147 Compounds |                                                                                                                                                                                                                                                               |        |      |        |
|---------------------------------------|---------------------------------------------------------------------------------------------------------------------------------------------------------------------------------------------------------------------------------------------------------------|--------|------|--------|
| Mol ID                                | Molecule Name                                                                                                                                                                                                                                                 | OB (%) | DL   | Source |
| MOL002211                             | 11,14-eicosadienoic acid                                                                                                                                                                                                                                      | 39.99  | 0.2  | Fu Zi  |
| MOL002388                             | Delphin_qt                                                                                                                                                                                                                                                    | 57.76  | 0.28 |        |
| MOL002392                             | Deltoin                                                                                                                                                                                                                                                       | 46.69  | 0.37 |        |
| MOL002393                             | DemethyldeLavaine A                                                                                                                                                                                                                                           | 34.52  | 0.18 |        |
| MOL002394                             | DemethyldeLavaine B                                                                                                                                                                                                                                           | 34.52  | 0.18 |        |
| MOL002395                             | Deoxyandrographolide                                                                                                                                                                                                                                          | 56.3   | 0.31 |        |
| MOL002397                             | karakoline                                                                                                                                                                                                                                                    | 51.73  | 0.73 |        |
| MOL002398                             | Karanjin                                                                                                                                                                                                                                                      | 69.56  | 0.34 |        |
| MOL002401                             | Neokadsuranic acid B                                                                                                                                                                                                                                          | 43.1   | 0.85 |        |
| MOL002406                             | 2,7-Dideacetyl-2,7-dibenzoyl-taxayunnanin F                                                                                                                                                                                                                   | 39.43  | 0.38 |        |
| MOL002410                             | benzoyl napelline                                                                                                                                                                                                                                             | 34.06  | 0.53 |        |
| MOL002415                             | 6-Demethyl desoline                                                                                                                                                                                                                                           | 51.87  | 0.66 |        |
| MOL002416                             | deoxyaconitine                                                                                                                                                                                                                                                | 30.96  | 0.24 |        |
| MOL002419                             | (R)-Norcoclaurine                                                                                                                                                                                                                                             | 82.54  | 0.21 |        |
| MOL002421                             | ignavine                                                                                                                                                                                                                                                      | 84.08  | 0.25 |        |
| MOL002422                             | isotalatizidine                                                                                                                                                                                                                                               | 50.82  | 0.73 |        |
| MOL002423                             | jesaconitine                                                                                                                                                                                                                                                  | 33.41  | 0.19 |        |
|                                       | (3R,8S,9R,10R,13R,14S,17R)-3-hydroxy-4,4,9,13,14-pentamethyl-17-[(E,2R)-6-methyl-7-[(2R,3R,4S,5S,6R)-3,4,5-trihydroxy-6-[(2R,3R,4S,5S,6R)-3,4,5-trihydroxy-6-(hydroxymethyl)oxan-2-yl]oxymethyl]oxan-2-yl]oxyhept-5-en-2-yl]-1,2,3,7,8,10,12,15,16,17-decahyd |        |      |        |
| MOL002433                             | [(2R,3R,4S,5S,6R)-3,4,5-trihydroxy-6-(hydroxymethyl)oxan-2-yl]oxymethyl]oxan-2-yl]oxyhept-5-en-2-yl]-1,2,3,7,8,10,12,15,16,17-decahyd                                                                                                                         | 41.52  | 0.22 |        |
| MOL002434                             | Carnosifloside I_qt                                                                                                                                                                                                                                           | 38.16  | 0.8  |        |
| MOL000359                             | sitosterol                                                                                                                                                                                                                                                    | 36.91  | 0.75 |        |
| MOL000538                             | hypaconitine                                                                                                                                                                                                                                                  | 31.39  | 0.26 |        |
| MOL002464                             | 1-Monolinolein                                                                                                                                                                                                                                                | 37.18  | 0.3  |        |

|           |                                                                                                                                                            |        |      |           |
|-----------|------------------------------------------------------------------------------------------------------------------------------------------------------------|--------|------|-----------|
| MOL002501 | [(1S)-3-[(E)-but-2-enyl]-2-methyl-4-oxo-1-cyclopent-2-enyl] (1R,3R)-3-[(E)-3-methoxy-2-methyl-3-oxoprop-1-enyl]-2,2-dimethylcyclopropane-1-carboxylate     | 62.52  | 0.31 | Gan Jiang |
| MOL002514 | Sexangularetin                                                                                                                                             | 62.86  | 0.3  |           |
| MOL000358 | beta-sitosterol                                                                                                                                            | 36.91  | 0.75 |           |
| MOL000359 | sitosterol                                                                                                                                                 | 36.91  | 0.75 |           |
| MOL000020 | 12-senecioid-2E,8E,10E-atractylentriol                                                                                                                     | 62.4   | 0.22 | BaiZhu    |
| MOL000021 | 14-acetyl-12-senecioid-2E,8E,10E-atractylentriol                                                                                                           | 60.31  | 0.31 |           |
| MOL000022 | 14-acetyl-12-senecioid-2E,8Z,10E-atractylentriol                                                                                                           | 63.37  | 0.3  |           |
| MOL000028 | $\alpha$ -Amyrin                                                                                                                                           | 39.51  | 0.76 |           |
| MOL000033 | (3S,8S,9S,10R,13R,14S,17R)-10,13-dimethyl-17-[(2R,5S)-5-propan-2-yl]octan-2-yl]-2,3,4,7,8,9,11,12,14,15,16,17-dodecahydro-1H-cyclopenta[a]phenanthren-3-ol | 36.23  | 0.78 |           |
| MOL000049 | 3 $\beta$ -acetoxyatractylone                                                                                                                              | 54.07  | 0.22 |           |
| MOL000072 | 8 $\beta$ -ethoxy atractylenolide III                                                                                                                      | 35.95  | 0.21 |           |
| MOL002879 | Diop                                                                                                                                                       | 43.59  | 0.39 |           |
| MOL000449 | Stigmasterol                                                                                                                                               | 43.83  | 0.76 |           |
| MOL000358 | beta-sitosterol                                                                                                                                            | 36.91  | 0.75 |           |
| MOL003648 | Inermin                                                                                                                                                    | 65.83  | 0.54 | Ren Shen  |
| MOL000422 | kaempferol                                                                                                                                                 | 41.88  | 0.24 |           |
| MOL004492 | Chrysanthemaxanthin                                                                                                                                        | 38.72  | 0.58 |           |
| MOL005308 | Aposiopolamine                                                                                                                                             | 66.65  | 0.22 |           |
| MOL005314 | Celabenzine                                                                                                                                                | 101.88 | 0.49 |           |
| MOL005317 | Deoxyharringtonine                                                                                                                                         | 39.27  | 0.81 |           |
| MOL005318 | Dianthramine                                                                                                                                               | 40.45  | 0.2  |           |
| MOL005320 | arachidonate                                                                                                                                               | 45.57  | 0.2  |           |
| MOL005321 | Frutinone A                                                                                                                                                | 65.9   | 0.34 |           |

|           |                                                                                                        |       |      |
|-----------|--------------------------------------------------------------------------------------------------------|-------|------|
| MOL005344 | ginsenoside rh2                                                                                        | 36.32 | 0.56 |
| MOL005348 | Ginsenoside-Rh4_qt                                                                                     | 31.11 | 0.78 |
| MOL005356 | Girinimbin                                                                                             | 61.22 | 0.31 |
| MOL005357 | Gomisin B                                                                                              | 31.99 | 0.83 |
| MOL005360 | malkangunin                                                                                            | 57.71 | 0.63 |
| MOL005376 | Panaxadiol                                                                                             | 33.09 | 0.79 |
| MOL005384 | suchilactone                                                                                           | 57.52 | 0.56 |
| MOL005399 | alexandrin_qt                                                                                          | 36.91 | 0.75 |
| MOL005401 | ginsenoside Rg5_qt                                                                                     | 39.56 | 0.79 |
| MOL000787 | Fumarine                                                                                               | 59.26 | 0.83 |
|           |                                                                                                        |       |      |
| MOL001484 | Inermine                                                                                               | 75.18 | 0.54 |
| MOL001792 | DFV                                                                                                    | 32.76 | 0.18 |
| MOL000211 | Mairin                                                                                                 | 55.38 | 0.78 |
| MOL002311 | Glycyrol                                                                                               | 90.78 | 0.67 |
| MOL000239 | Jaranol                                                                                                | 50.83 | 0.29 |
| MOL002565 | Medicarpin                                                                                             | 49.22 | 0.34 |
| MOL000354 | isorhamnetin                                                                                           | 49.6  | 0.31 |
| MOL000359 | sitosterol                                                                                             | 36.91 | 0.75 |
| MOL003656 | Lupiwighteone                                                                                          | 51.64 | 0.37 |
| MOL003896 | 7-Methoxy-2-methyl<br>isoflavone                                                                       | 42.56 | 0.2  |
| MOL000392 | formononetin                                                                                           | 69.67 | 0.21 |
| MOL000417 | Calycosin                                                                                              | 47.75 | 0.24 |
| MOL000422 | kaempferol                                                                                             | 41.88 | 0.24 |
| MOL004328 | naringenin                                                                                             | 59.29 | 0.21 |
|           |                                                                                                        |       |      |
| MOL004805 | (2S)-2-[4-hydroxy-3-(3-methylbut-2-enyl)phenyl]-<br>8,8-dimethyl-2,3-dihydropyrano[2,3-f]chromen-4-one | 31.79 | 0.72 |
| MOL004806 | euchrenone                                                                                             | 30.29 | 0.57 |
| MOL004808 | glyasperin B                                                                                           | 65.22 | 0.44 |
| MOL004810 | glyasperin F                                                                                           | 75.84 | 0.54 |
| MOL004811 | Glyasperin C                                                                                           | 45.56 | 0.4  |
| MOL004814 | Isotrifoliol                                                                                           | 31.94 | 0.42 |
|           |                                                                                                        |       |      |
| MOL004815 | (E)-1-(2,4-dihydroxyphenyl)-3-(2,2-dimethylchromen-6-yl)prop-2-en-1-one                                | 39.62 | 0.35 |
| MOL004820 | kanzonols W                                                                                            | 50.48 | 0.52 |

|           |                                                                                                     |       |      |
|-----------|-----------------------------------------------------------------------------------------------------|-------|------|
| MOL004824 | (2S)-6-(2,4-dihydroxyphenyl)-2-(2-hydroxypropan-2-yl)-4-methoxy-2,3-dihydrofuro[3,2-g]chromen-7-one | 60.25 | 0.63 |
| MOL004827 | Semilicoisoflavone B                                                                                | 48.78 | 0.55 |
| MOL004828 | Glepidotin A                                                                                        | 44.72 | 0.35 |
| MOL004829 | Glepidotin B                                                                                        | 64.46 | 0.34 |
| MOL004833 | Phaseolinisoflavan                                                                                  | 32.01 | 0.45 |
| MOL004835 | Glypallichalcone                                                                                    | 61.6  | 0.19 |
| MOL004838 | 8-(6-hydroxy-2-benzofuranyl)-2,2-dimethyl-5-chromenol                                               | 58.44 | 0.38 |
| MOL004841 | Licochalcone B                                                                                      | 76.76 | 0.19 |
| MOL004848 | licochalcone G                                                                                      | 49.25 | 0.32 |
| MOL004849 | 3-(2,4-dihydroxyphenyl)-8-(1,1-dimethylprop-2-enyl)-7-hydroxy-5-methoxycoumarin                     | 59.62 | 0.43 |
| MOL004855 | Licoricone                                                                                          | 63.58 | 0.47 |
| MOL004856 | Gancaonin A                                                                                         | 51.08 | 0.4  |
| MOL004857 | Gancaonin B                                                                                         | 48.79 | 0.45 |
| MOL004860 | licorice glycoside E                                                                                | 32.89 | 0.27 |
| MOL004863 | 3-(3,4-dihydroxyphenyl)-5,7-dihydroxy-8-(3-methylbut-2-enyl)chromone                                | 66.37 | 0.41 |
| MOL004864 | 5,7-dihydroxy-3-(4-methoxyphenyl)-8-(3-methylbut-2-enyl)chromone                                    | 30.49 | 0.41 |
| MOL004866 | 2-(3,4-dihydroxyphenyl)-5,7-dihydroxy-6-(3-methylbut-2-enyl)chromone                                | 44.15 | 0.41 |
| MOL004879 | Glycyrin                                                                                            | 52.61 | 0.47 |
| MOL004882 | Licocoumarone                                                                                       | 33.21 | 0.36 |
| MOL004883 | Licoisoflavone                                                                                      | 41.61 | 0.42 |
| MOL004884 | Licoisoflavone B                                                                                    | 38.93 | 0.55 |
| MOL004885 | licoisoflavanone                                                                                    | 52.47 | 0.54 |
| MOL004891 | shinpterocarpin                                                                                     | 80.3  | 0.73 |

|           |                                                                        |       |      |         |
|-----------|------------------------------------------------------------------------|-------|------|---------|
| MOL004898 | (E)-3-[3,4-dihydroxy-5-(3-methylbut-2-enyl)phenyl]-1-(2,4-             | 46.27 | 0.31 | Gan Cao |
|           | dihydroxyphenyl)prop-2-en-liquiritin                                   | 65.69 | 0.74 |         |
| MOL004903 | licopyranocoumarin                                                     | 80.36 | 0.65 |         |
| MOL004904 | 3,22-Dihydroxy-11-oxo-delta(12)-oleanene-27-                           | 34.32 | 0.55 |         |
|           | alpha-methoxycarbonyl-29-oic acid                                      |       |      |         |
| MOL004907 | Glyzaglabrin                                                           | 61.07 | 0.35 |         |
| MOL004908 | Glabridin                                                              | 53.25 | 0.47 |         |
| MOL004910 | Glabranin                                                              | 52.9  | 0.31 |         |
| MOL004911 | Glabrene                                                               | 46.27 | 0.44 |         |
| MOL004912 | Glabrone                                                               | 52.51 | 0.5  |         |
| MOL004913 | 1,3-dihydroxy-9-methoxy-6-benzofurano[3,2-c]chromenone                 | 48.14 | 0.43 |         |
|           | 1,3-dihydroxy-8,9-dimethoxy-6-benzofurano[3,2-c]chromenone             | 62.9  | 0.53 |         |
| MOL004914 | Eurycarpin A                                                           | 43.28 | 0.37 |         |
| MOL004915 | glycyroside                                                            | 37.25 | 0.79 |         |
| MOL004917 | (-)-Medicocarpin                                                       | 40.99 | 0.95 |         |
| MOL004924 | Sigmoidin-B                                                            | 34.88 | 0.41 |         |
| MOL004935 | (2R)-7-hydroxy-2-(4-hydroxyphenyl)chroman-4-one                        | 71.12 | 0.18 |         |
|           | (2S)-7-hydroxy-2-(4-hydroxyphenyl)-8-(3-methylbut-2-enyl)chroman-4-one | 36.57 | 0.32 |         |
| MOL004941 | Isoglycyrol                                                            | 44.7  | 0.84 |         |
| MOL004948 | Isolicoflavonol                                                        | 45.17 | 0.42 |         |
| MOL004949 | HMO                                                                    | 38.37 | 0.21 |         |
| MOL004957 | 1-Methoxyphaseollidin                                                  | 69.98 | 0.64 |         |
| MOL004959 | Quercetin der.                                                         | 46.45 | 0.33 |         |
| MOL004961 | 3'-Hydroxy-4'-O-Methylglabridin                                        | 43.71 | 0.57 |         |
| MOL004966 | licochalcone a                                                         | 40.79 | 0.29 |         |
| MOL000497 | 3'-Methoxyglabridin                                                    | 46.16 | 0.57 |         |
| MOL004974 |                                                                        |       |      |         |

|           |                                                                                |       |      |
|-----------|--------------------------------------------------------------------------------|-------|------|
| MOL004978 | 2-[(3R)-8,8-dimethyl-3,4-dihydro-2H-pyrano[6,5-f]chromen-3-yl]-5-methoxyphenol | 36.21 | 0.52 |
| MOL004980 | Inflacoumarin A                                                                | 39.71 | 0.33 |
| MOL004985 | icos-5-enoic acid                                                              | 30.7  | 0.2  |
| MOL004988 | Kanzonol F                                                                     | 32.47 | 0.89 |
| MOL004989 | 6-prenylated eriodictyol                                                       | 39.22 | 0.41 |
| MOL004990 | 7,2',4'-trihydroxy-5-methoxy-3-aryl coumarin                                   | 83.71 | 0.27 |
| MOL004991 | 7-Acetoxy-2-methylisoflavone                                                   | 38.92 | 0.26 |
| MOL004993 | 8-prenylated eriodictyol                                                       | 53.79 | 0.4  |
| MOL004996 | gadelaicid acid                                                                | 30.7  | 0.2  |
| MOL000500 | Vestitol                                                                       | 74.66 | 0.21 |
| MOL005000 | Gancaonin G                                                                    | 60.44 | 0.39 |
| MOL005001 | Gancaonin H                                                                    | 50.1  | 0.78 |
| MOL005003 | Licoagrocarpin                                                                 | 58.81 | 0.58 |
| MOL005007 | Glyasperins M                                                                  | 72.67 | 0.59 |
| MOL005008 | Glycyrrhiza flavonol A                                                         | 41.28 | 0.6  |
| MOL005012 | Licoagroisoflavone                                                             | 57.28 | 0.49 |
| MOL005013 | 18 $\alpha$ -hydroxyglycyrrhetic acid                                          | 41.16 | 0.71 |
| MOL005016 | Odoratin                                                                       | 49.95 | 0.3  |
| MOL005017 | Phaseol                                                                        | 78.77 | 0.58 |
| MOL005018 | Xambioona                                                                      | 54.85 | 0.87 |
| MOL005020 | dehydroglyasperins C                                                           | 53.82 | 0.37 |
| MOL000098 | quercetin                                                                      | 46.43 | 0.28 |

Specification: The duplicate value is marked in light red

| Information of 147 Targets |    |                                      |               |             |        |
|----------------------------|----|--------------------------------------|---------------|-------------|--------|
| MOLID                      | ID | (pinyin_name, Mod)                   | Norm Fit      | Uniplot     | GENE   |
| MOL000359                  | A1 | FU ZI, GAN<br>JIANG, GAN<br>N<br>CAO | 1j96_v 0.9987 | AK1C2_HUMAN | AKR1C2 |
| MOL000359                  | A1 | FU ZI, GAN<br>JIANG, GAN<br>CAO      | 1e7e_v 0.9838 | ALBU_HUMAN  | ALB    |

|           |    |                                      |        |        |             |         |
|-----------|----|--------------------------------------|--------|--------|-------------|---------|
| MOL000359 | A1 | FU ZI, GAN<br>JIANG, GAN<br>N<br>CAO | 1oj9_v | 0.9779 | AOFB_HUMAN  | MAOB    |
| MOL000359 | A1 | FU ZI, GAN<br>JIANG, GAN<br>N<br>CAO | 1l6l_v | 0.9707 | APOA2_HUMAN | APOA2   |
| MOL000359 | A1 | FU ZI, GAN<br>JIANG, GAN<br>N<br>CAO | 1reu_v | 0.9914 | BMP2_HUMAN  | BMP2    |
| MOL000359 | A1 | FU ZI, GAN<br>JIANG, GAN<br>N<br>CAO | 1ze8_v | 0.9893 | CAH2_HUMAN  | CA2     |
| MOL000359 | A1 | FU ZI, GAN<br>JIANG, GAN<br>N<br>CAO | 1shj_v | 0.9523 | CASP7_HUMAN | CASP7   |
| MOL000359 | A1 | FU ZI, GAN<br>JIANG, GAN<br>N<br>CAO | 2pg2_v | 0.9431 | KIF11_HUMAN | KIF11   |
| MOL000359 | A1 | FU ZI, GAN<br>JIANG, GAN<br>N<br>CAO | 1ya3_v | 0.9497 | MCR_HUMAN   | NR3C2   |
| MOL000359 | A1 | FU ZI, GAN<br>JIANG, GAN<br>N<br>CAO | 1pme_v | 0.9959 | MK01_HUMAN  | MAPK1   |
| MOL000359 | A1 | FU ZI, GAN<br>JIANG, GAN<br>N<br>CAO | 830c_v | 0.9002 | MMP13_HUMAN | MMP13   |
| MOL000359 | A1 | FU ZI, GAN<br>JIANG, GAN<br>N<br>CAO | 2pin_v | 0.9845 | P10828      | THRB    |
| MOL000359 | A1 | FU ZI, GAN<br>JIANG, GAN<br>N<br>CAO | 3bgp_v | 0.9921 | P11309      | PIM1    |
| MOL000359 | A1 | FU ZI, GAN<br>JIANG, GAN<br>N<br>CAO | 1qyx_v | 0.9168 | P14061      | HSD17B1 |





|           |     |                        |        |        |             |          |
|-----------|-----|------------------------|--------|--------|-------------|----------|
| MOL000358 | B1  | GANJIANG<br>,RENSHEN   | 1j99_v | 0.9077 | Q06520      | SULT2A1  |
| MOL000358 | B1  | GANJIANG<br>,RENSHEN   | 1n83_v | 0.9803 | RORA_HUMAN  | RORA     |
| MOL000358 | B1  | GANJIANG<br>,RENSHEN   | 1p49_v | 0.974  | STS_HUMAN   | STS      |
| MOL000358 | B1  | GANJIANG<br>,RENSHEN   | 1j78_v | 0.9182 | VTDB_HUMAN  | GC       |
| MOL000422 | C1  | SHEN,GAN<br>CAO<br>REN | 1xlu_v | 0.9711 | CHLE_HUMAN  | BCHE     |
| MOL000422 | C1  | SHEN,GAN<br>CAO<br>REN | 2itx_v | 0.9376 | EGFR_HUMAN  | EGFR     |
| MOL000422 | C1  | SHEN,GAN<br>CAO<br>REN | 2pog_v | 0.9774 | ESR1_HUMAN  | ESR1     |
| MOL000422 | C1  | SHEN,GAN<br>CAO<br>REN | 1ogs_v | 0.922  | GLCM_HUMAN  | GBA      |
| MOL000422 | C1  | SHEN,GAN<br>CAO<br>REN | 2hck_v | 0.9938 | HCK_HUMAN   | HCK      |
| MOL000422 | C1  | SHEN,GAN<br>CAO        | 1yxx_v | 0.9592 | PIM1_HUMAN  | PIM1     |
| MOL000020 | BZ1 | BAI ZHU                | 1xf0_v | 0.9865 | AK1C3_HUMAN | AKR1C3   |
| MOL000020 | BZ1 | BAI ZHU                | 2pir_v | 0.9814 | ANDR_HUMAN  | AR       |
| MOL000020 | BZ1 | BAI ZHU                | 1hak_v | 0.9128 | ANXA5_HUMAN | ANXA5    |
| MOL000020 | BZ1 | BAI ZHU                | 3bmp_v | 0.9903 | BMP2_HUMAN  | BMP2     |
| MOL000020 | BZ1 | BAI ZHU                | 2qo8_v | 0.9904 | CAH2_HUMAN  | CA2      |
| MOL000020 | BZ1 | BAI ZHU                | 1gfw_v | 0.9559 | CASP3_HUMAN | CASP3    |
| MOL000020 | BZ1 | BAI ZHU                | 1rs0_v | 0.9655 | CFAB_HUMAN  | CFB      |
| MOL000020 | BZ1 | BAI ZHU                | 1p0i_v | 0.9791 | CHLE_HUMAN  | BCHE     |
| MOL000020 | BZ1 | BAI ZHU                | 1vec_v | 0.9489 | DDX6_HUMAN  | DDX6     |
| MOL000020 | BZ1 | BAI ZHU                | 20gs_v | 0.9823 | GSTP1_HUMAN | GSTP1    |
| MOL000020 | BZ1 | BAI ZHU                | 2fky_v | 0.9543 | KIF11_HUMAN | KIF11    |
| MOL000020 | BZ1 | BAI ZHU                | 1pme_v | 0.9527 | MK01_HUMAN  | MAPK1    |
| MOL000020 | BZ1 | BAI ZHU                | 1uki_v | 0.9862 | MK08_HUMAN  | MAPK8    |
| MOL000020 | BZ1 | BAI ZHU                | 1pmv_v | 0.9949 | MK10_HUMAN  | MAPK10   |
| MOL000020 | BZ1 | BAI ZHU                | 830c_v | 0.9749 | MMP13_HUMAN | MMP13    |
| MOL000020 | BZ1 | BAI ZHU                | 1bm6_v | 0.9927 | MMP3_HUMAN  | MMP3     |
| MOL000020 | BZ1 | BAI ZHU                | 1pq9_v | 0.9507 | NR1H2_HUMAN | NR1H2    |
| MOL000020 | BZ1 | BAI ZHU                | 3eqm_v | 0.953  | P11511      | CYP19A1  |
| MOL000020 | BZ1 | BAI ZHU                | 2jbp_v | 0.9929 | P49137      | 1APKAPK2 |
| MOL000020 | BZ1 | BAI ZHU                | 1w8l_v | 0.9903 | P62937      | PPIA     |
| MOL000020 | BZ1 | BAI ZHU                | 2c3i_v | 0.9762 | PIM1_HUMAN  | PIM1     |

|           |     |         |        |        |             |          |
|-----------|-----|---------|--------|--------|-------------|----------|
| MOL000020 | BZ1 | BAI ZHU | 2f6t_v | 0.9922 | PTN1_HUMAN  | PTPN1    |
| MOL000020 | BZ1 | BAI ZHU | 1zyj_v | 0.9167 | Q16539      | MAPK14   |
| MOL000020 | BZ1 | BAI ZHU | 1q8m_v | 0.9868 | Q9NP99      | TREM1    |
| MOL000020 | BZ1 | BAI ZHU | 1no9_v | 0.9032 | THRB_HUMAN  | F2       |
| MOL000020 | BZ1 | BAI ZHU | 2roy_v | 0.9892 | TTHY_HUMAN  | TTR      |
| MOL000021 | BZ2 | BAI ZHU | 1e7e_v | 0.9987 | ALBU_HUMAN  | ALB      |
| MOL000021 | BZ2 | BAI ZHU | 2ama_v | 0.9904 | ANDR_HUMAN  | AR       |
| MOL000021 | BZ2 | BAI ZHU | 1hak_v | 0.9276 | ANXA5_HUMAN | ANXA5    |
| MOL000021 | BZ2 | BAI ZHU | 1oj9_v | 0.9473 | AOFB_HUMAN  | MAOB     |
| MOL000021 | BZ2 | BAI ZHU | 1l6l_v | 0.9981 | APOA2_HUMAN | APOA2    |
| MOL000021 | BZ2 | BAI ZHU | 3bmp_v | 0.9557 | BMP2_HUMAN  | BMP2     |
| MOL000021 | BZ2 | BAI ZHU | 1oq5_v | 0.9929 | CAH2_HUMAN  | CA2      |
| MOL000021 | BZ2 | BAI ZHU | 3dej_v | 0.9824 | CASP3_HUMAN | CASP3    |
| MOL000021 | BZ2 | BAI ZHU | 1shj_v | 0.9524 | CASP7_HUMAN | CASP7    |
| MOL000021 | BZ2 | BAI ZHU | 1lyw_v | 0.9606 | CATD_HUMAN  | CTSD     |
| MOL000021 | BZ2 | BAI ZHU | 2uzd_v | 0.9491 | CCNA2_HUMAN | CCNA2    |
| MOL000021 | BZ2 | BAI ZHU | 1unh_v | 0.9424 | CD5R1_HUMAN | CDK5R1   |
| MOL000021 | BZ2 | BAI ZHU | 1rs0_v | 0.99   | CFAB_HUMAN  | CFB      |
| MOL000021 | BZ2 | BAI ZHU | 2brb_v | 0.918  | CHK1_HUMAN  | CHEK1    |
| MOL000021 | BZ2 | BAI ZHU | 1p0i_v | 0.9918 | CHLE_HUMAN  | BCHE     |
| MOL000021 | BZ2 | BAI ZHU | 1vec_v | 0.9688 | DDX6_HUMAN  | DDX6     |
| MOL000021 | BZ2 | BAI ZHU | 2ocf_v | 0.9841 | ESR1_HUMAN  | ESR1     |
| MOL000021 | BZ2 | BAI ZHU | 1ya8_v | 0.9865 | EST1_HUMAN  | CES1     |
| MOL000021 | BZ2 | BAI ZHU | 1f40_v | 0.9982 | FKB1A_HUMAN | FKBP1A   |
| MOL000021 | BZ2 | BAI ZHU | 1lbk_v | 0.988  | GSTP1_HUMAN | GSTP1    |
| MOL000021 | BZ2 | BAI ZHU | 2pg2_v | 0.9966 | KIF11_HUMAN | KIF11    |
| MOL000021 | BZ2 | BAI ZHU | 1pme_v | 0.9302 | MK01_HUMAN  | MAPK1    |
| MOL000021 | BZ2 | BAI ZHU | 1uki_v | 0.9995 | MK08_HUMAN  | MAPK8    |
| MOL000021 | BZ2 | BAI ZHU | 1pmv_v | 0.9973 | MK10_HUMAN  | MAPK10   |
| MOL000021 | BZ2 | BAI ZHU | 1bm6_v | 0.9917 | MMP3_HUMAN  | MMP3     |
| MOL000021 | BZ2 | BAI ZHU | 1qqs_v | 0.9954 | NGAL_HUMAN  | LCN2     |
| MOL000021 | BZ2 | BAI ZHU | 1pq9_v | 0.9314 | NR1H2_HUMAN | NR1H2    |
| MOL000021 | BZ2 | BAI ZHU | 2pin_v | 0.9864 | P10828      | THRB     |
| MOL000021 | BZ2 | BAI ZHU | 3bgp_v | 0.9785 | P11309      | PIM1     |
| MOL000021 | BZ2 | BAI ZHU | 3eqm_v | 0.9021 | P11511      | CYP19A1  |
| MOL000021 | BZ2 | BAI ZHU | 2jbp_v | 0.9849 | P49137      | 1APKAPK2 |
| MOL000021 | BZ2 | BAI ZHU | 1w8l_v | 0.9917 | P62937      | PPIA     |
| MOL000021 | BZ2 | BAI ZHU | 2f6v_v | 0.9882 | PTN1_HUMAN  | PTPN1    |
| MOL000021 | BZ2 | BAI ZHU | 1p49_v | 0.9972 | STS_HUMAN   | STS      |
| MOL000021 | BZ2 | BAI ZHU | 1no9_v | 0.9712 | THRB_HUMAN  | F2       |
| MOL000021 | BZ2 | BAI ZHU | 1f86_v | 0.9927 | TTHY_HUMAN  | TTR      |
| MOL000022 | BZ3 | BAI ZHU | 1j96_v | 0.9234 | AK1C2_HUMAN | AKR1C2   |

|           |     |         |        |        |             |          |
|-----------|-----|---------|--------|--------|-------------|----------|
| MOL000022 | BZ3 | BAI ZHU | 1xf0_v | 0.9603 | AK1C3_HUMAN | AKR1C3   |
| MOL000022 | BZ3 | BAI ZHU | 1e7e_v | 0.9919 | ALBU_HUMAN  | ALB      |
| MOL000022 | BZ3 | BAI ZHU | 2agt_v | 0.9237 | ALDR_HUMAN  | AKR1B1   |
| MOL000022 | BZ3 | BAI ZHU | 2pir_v | 0.9892 | ANDR_HUMAN  | AR       |
| MOL000022 | BZ3 | BAI ZHU | 1hak_v | 0.9402 | ANXA5_HUMAN | ANXA5    |
| MOL000022 | BZ3 | BAI ZHU | 1oj9_v | 0.9913 | AOFB_HUMAN  | MAOB     |
| MOL000022 | BZ3 | BAI ZHU | 1l6l_v | 0.9764 | APOA2_HUMAN | APOA2    |
| MOL000022 | BZ3 | BAI ZHU | 2q11_v | 0.9858 | BACE1_HUMAN | BACE1    |
| MOL000022 | BZ3 | BAI ZHU | 3bmp_v | 0.9824 | BMP2_HUMAN  | BMP2     |
| MOL000022 | BZ3 | BAI ZHU | 1if4_v | 0.9932 | CAH2_HUMAN  | CA2      |
| MOL000022 | BZ3 | BAI ZHU | 3dej_v | 0.959  | CASP3_HUMAN | CASP3    |
| MOL000022 | BZ3 | BAI ZHU | 1shj_v | 0.9857 | CASP7_HUMAN | CASP7    |
| MOL000022 | BZ3 | BAI ZHU | 1lyw_v | 0.9538 | CATD_HUMAN  | CTSD     |
| MOL000022 | BZ3 | BAI ZHU | 2uzd_v | 0.9117 | CCNA2_HUMAN | CCNA2    |
| MOL000022 | BZ3 | BAI ZHU | 1unh_v | 0.9188 | CD5R1_HUMAN | CDK5R1   |
| MOL000022 | BZ3 | BAI ZHU | 1rs0_v | 0.9832 | CFAB_HUMAN  | CFB      |
| MOL000022 | BZ3 | BAI ZHU | 1dic_v | 0.9593 | CFAD_HUMAN  | CFD      |
| MOL000022 | BZ3 | BAI ZHU | 2brg_v | 0.9736 | CHK1_HUMAN  | CHEK1    |
| MOL000022 | BZ3 | BAI ZHU | 1p0i_v | 0.9764 | CHLE_HUMAN  | BCHE     |
| MOL000022 | BZ3 | BAI ZHU | 1vec_v | 0.9684 | DDX6_HUMAN  | DDX6     |
| MOL000022 | BZ3 | BAI ZHU | 2ity_v | 0.9295 | EGFR_HUMAN  | EGFR     |
| MOL000022 | BZ3 | BAI ZHU | 2vwu_v | 0.9688 | EPHB4_HUMAN | EPHB4    |
| MOL000022 | BZ3 | BAI ZHU | 2ocf_v | 0.9712 | ESR1_HUMAN  | ESR1     |
| MOL000022 | BZ3 | BAI ZHU | 1qkm_v | 0.9412 | ESR2_HUMAN  | ESR2     |
| MOL000022 | BZ3 | BAI ZHU | 1ya8_v | 0.986  | EST1_HUMAN  | CES1     |
| MOL000022 | BZ3 | BAI ZHU | 1f40_v | 0.9933 | FKB1A_HUMAN | FKBP1A   |
| MOL000022 | BZ3 | BAI ZHU | 1ogs_v | 0.9184 | GLCM_HUMAN  | GBA      |
| MOL000022 | BZ3 | BAI ZHU | 1md3_v | 0.9876 | GSTP1_HUMAN | GSTP1    |
| MOL000022 | BZ3 | BAI ZHU | 2pg2_v | 0.9859 | KIF11_HUMAN | KIF11    |
| MOL000022 | BZ3 | BAI ZHU | 1pme_v | 0.9908 | MK01_HUMAN  | MAPK1    |
| MOL000022 | BZ3 | BAI ZHU | 1uki_v | 0.9992 | MK08_HUMAN  | MAPK8    |
| MOL000022 | BZ3 | BAI ZHU | 1pmv_v | 0.9984 | MK10_HUMAN  | MAPK10   |
| MOL000022 | BZ3 | BAI ZHU | 1eub_v | 0.9905 | MMP13_HUMAN | MMP13    |
| MOL000022 | BZ3 | BAI ZHU | 1bm6_v | 0.999  | MMP3_HUMAN  | MMP3     |
| MOL000022 | BZ3 | BAI ZHU | 2pin_v | 0.9832 | P10828      | THRB     |
| MOL000022 | BZ3 | BAI ZHU | 3eqm_v | 0.9649 | P11511      | CYP19A1  |
| MOL000022 | BZ3 | BAI ZHU | 3cjf_v | 0.9974 | P35968      | KDR      |
| MOL000022 | BZ3 | BAI ZHU | 2jbp_v | 0.9967 | P49137      | 4APKAPK2 |
| MOL000022 | BZ3 | BAI ZHU | 1w8l_v | 0.9806 | P62937      | PPIA     |
| MOL000022 | BZ3 | BAI ZHU | 2c3i_v | 0.9821 | PIM1_HUMAN  | PIM1     |
| MOL000022 | BZ3 | BAI ZHU | 1v3q_v | 0.9833 | PNPH_HUMAN  | PNP      |
| MOL000022 | BZ3 | BAI ZHU | 1zgy_v | 0.9765 | PPARG_HUMAN | PPARG    |

|           |     |         |        |        |             |          |
|-----------|-----|---------|--------|--------|-------------|----------|
| MOL000022 | BZ3 | BAI ZHU | 2ovm_v | 0.9359 | PRGR_HUMAN  | PGR      |
| MOL000022 | BZ3 | BAI ZHU | 1q8m_v | 0.9905 | Q9NP99      | TREM1    |
| MOL000022 | BZ3 | BAI ZHU | 1n83_v | 0.9082 | RORA_HUMAN  | RORA     |
| MOL000022 | BZ3 | BAI ZHU | 1p49_v | 0.9974 | STS_HUMAN   | STS      |
| MOL000022 | BZ3 | BAI ZHU | 1vjy_v | 0.9063 | TGFR1_HUMAN | TGFBR1   |
| MOL000022 | BZ3 | BAI ZHU | 1no9_v | 0.9943 | THRB_HUMAN  | F2       |
| MOL000022 | BZ3 | BAI ZHU | 1f86_v | 0.9971 | TTHY_HUMAN  | TTR      |
| MOL000022 | BZ3 | BAI ZHU | 1j78_v | 0.9779 | VTDB_HUMAN  | GC       |
| MOL000028 | BZ4 | BAI ZHU | 1j96_v | 0.9957 | AK1C2_HUMAN | AKR1C2   |
| MOL000028 | BZ4 | BAI ZHU | 1e7e_v | 0.9837 | ALBU_HUMAN  | ALB      |
| MOL000028 | BZ4 | BAI ZHU | 1l6l_v | 0.9556 | APOA2_HUMAN | APOA2    |
| MOL000028 | BZ4 | BAI ZHU | 1reu_v | 0.9718 | BMP2_HUMAN  | BMP2     |
| MOL000028 | BZ4 | BAI ZHU | 1okl_v | 0.9484 | CAH2_HUMAN  | CA2      |
| MOL000028 | BZ4 | BAI ZHU | 1shj_v | 0.9693 | CASP7_HUMAN | CASP7    |
| MOL000028 | BZ4 | BAI ZHU | 1xdd_v | 0.9998 | ITAL_HUMAN  | ITGAL    |
| MOL000028 | BZ4 | BAI ZHU | 2pg2_v | 0.963  | KIF11_HUMAN | KIF11    |
| MOL000028 | BZ4 | BAI ZHU | 1eub_v | 0.9832 | MMP13_HUMAN | MMP13    |
| MOL000028 | BZ4 | BAI ZHU | 3bgp_v | 0.9448 | P11309      | PIM1     |
| MOL000028 | BZ4 | BAI ZHU | 2p3g_v | 0.9533 | P49137      | 1APKAPK2 |
| MOL000028 | BZ4 | BAI ZHU | 1wbo_v | 0.9146 | Q16539      | MAPK14   |
| MOL000028 | BZ4 | BAI ZHU | 1p49_v | 0.9868 | STS_HUMAN   | STS      |
| MOL000028 | BZ4 | BAI ZHU | 2roy_v | 0.9521 | TTHY_HUMAN  | TTR      |
| MOL000033 | BZ5 | BAI ZHU | 1j96_v | 0.9987 | AK1C2_HUMAN | AKR1C2   |
| MOL000033 | BZ5 | BAI ZHU | 1e7e_v | 0.9729 | ALBU_HUMAN  | ALB      |
| MOL000033 | BZ5 | BAI ZHU | 1oj9_v | 0.9987 | AOFB_HUMAN  | MAOB     |
| MOL000033 | BZ5 | BAI ZHU | 1l6l_v | 0.9787 | APOA2_HUMAN | APOA2    |
| MOL000033 | BZ5 | BAI ZHU | 1reu_v | 0.991  | BMP2_HUMAN  | BMP2     |
| MOL000033 | BZ5 | BAI ZHU | 1ze8_v | 0.9859 | CAH2_HUMAN  | CA2      |
| MOL000033 | BZ5 | BAI ZHU | 1shj_v | 0.9661 | CASP7_HUMAN | CASP7    |
| MOL000033 | BZ5 | BAI ZHU | 1qku_v | 0.9256 | ESR1_HUMAN  | ESR1     |
| MOL000033 | BZ5 | BAI ZHU | 1f40_v | 0.9558 | FKB1A_HUMAN | FKBP1A   |
| MOL000033 | BZ5 | BAI ZHU | 2pg2_v | 0.9503 | KIF11_HUMAN | KIF11    |
| MOL000033 | BZ5 | BAI ZHU | 2aa6_v | 0.9071 | MCR_HUMAN   | NR3C2    |
| MOL000033 | BZ5 | BAI ZHU | 1eub_v | 0.9364 | MMP13_HUMAN | MMP13    |
| MOL000033 | BZ5 | BAI ZHU | 2pin_v | 0.9645 | P10828      | THRB     |
| MOL000033 | BZ5 | BAI ZHU | 3bgp_v | 0.9902 | P11309      | PIM1     |
| MOL000033 | BZ5 | BAI ZHU | 2jbp_v | 0.9968 | P49137      | 1APKAPK2 |
| MOL000033 | BZ5 | BAI ZHU | 1n83_v | 0.9427 | RORA_HUMAN  | RORA     |
| MOL000033 | BZ5 | BAI ZHU | 1p49_v | 0.9761 | STS_HUMAN   | STS      |
| MOL000033 | BZ5 | BAI ZHU | 2roy_v | 0.9003 | TTHY_HUMAN  | TTR      |
| MOL000033 | BZ5 | BAI ZHU | 1j78_v | 0.9642 | VTDB_HUMAN  | GC       |
| MOL000049 | BZ6 | BAI ZHU | 1j96_v | 0.9316 | AK1C2_HUMAN | AKR1C2   |

|           |     |         |        |        |             |          |
|-----------|-----|---------|--------|--------|-------------|----------|
| MOL000049 | BZ6 | BAI ZHU | 1lf4_v | 0.9635 | CAH2_HUMAN  | CA2      |
| MOL000049 | BZ6 | BAI ZHU | 1xdd_v | 0.9891 | ITAL_HUMAN  | ITGAL    |
| MOL000049 | BZ6 | BAI ZHU | 1w8l_v | 0.9762 | P62937      | PPIA     |
| MOL000072 | BZ7 | BAI ZHU | 1j96_v | 0.9022 | AK1C2_HUMAN | AKR1C2   |
| MOL000072 | BZ7 | BAI ZHU | 1okl_v | 0.9128 | CAH2_HUMAN  | CA2      |
| MOL000072 | BZ7 | BAI ZHU | 1md3_v | 0.9744 | GSTP1_HUMAN | GSTP1    |
| MOL000072 | BZ7 | BAI ZHU | 1pme_v | 0.9177 | MK01_HUMAN  | MAPK1    |
| MOL000072 | BZ7 | BAI ZHU | 1uki_v | 0.911  | MK08_HUMAN  | MAPK8    |
| MOL000072 | BZ7 | BAI ZHU | 1pmv_v | 0.9371 | MK10_HUMAN  | MAPK10   |
| MOL000072 | BZ7 | BAI ZHU | 2p3g_v | 0.9396 | P49137      | 1APKAPK2 |
| MOL000072 | BZ7 | BAI ZHU | 2a4z_v | 0.9136 | PK3CG_HUMAN | PIK3CG   |
| MOL002211 | FZ1 | FU ZI   | 3b92_v | 0.9105 | ADA17_HUMAN | ADAM17   |
| MOL002211 | FZ1 | FU ZI   | 1j96_v | 0.9384 | AK1C2_HUMAN | AKR1C2   |
| MOL002211 | FZ1 | FU ZI   | 1e7e_v | 0.9723 | ALBU_HUMAN  | ALB      |
| MOL002211 | FZ1 | FU ZI   | 1x97_v | 0.9554 | ALDR_HUMAN  | AKR1B1   |
| MOL002211 | FZ1 | FU ZI   | 2pir_v | 0.987  | ANDR_HUMAN  | AR       |
| MOL002211 | FZ1 | FU ZI   | 1oj9_v | 0.9978 | AOFB_HUMAN  | MAOB     |
| MOL002211 | FZ1 | FU ZI   | 1l6l_v | 0.9652 | APOA2_HUMAN | APOA2    |
| MOL002211 | FZ1 | FU ZI   | 1reu_v | 0.9997 | BMP2_HUMAN  | BMP2     |
| MOL002211 | FZ1 | FU ZI   | 2qo8_v | 0.9883 | CAH2_HUMAN  | CA2      |
| MOL002211 | FZ1 | FU ZI   | 1h1p_v | 0.9869 | CCNA2_HUMAN | CCNA2    |
| MOL002211 | FZ1 | FU ZI   | 1rs0_v | 0.938  | CFAB_HUMAN  | CFB      |
| MOL002211 | FZ1 | FU ZI   | 2cgw_v | 0.9255 | CHK1_HUMAN  | CHEK1    |
| MOL002211 | FZ1 | FU ZI   | 1p0i_v | 0.9431 | CHLE_HUMAN  | BCHE     |
| MOL002211 | FZ1 | FU ZI   | 1tg6_v | 0.9523 | CLPP_HUMAN  | CLPP     |
| MOL002211 | FZ1 | FU ZI   | 1yb1_v | 0.941  | DHB11_HUMAN | HSD17B11 |
| MOL002211 | FZ1 | FU ZI   | 1qku_v | 0.9444 | ESR1_HUMAN  | ESR1     |
| MOL002211 | FZ1 | FU ZI   | 1md3_v | 0.9498 | GSTP1_HUMAN | GSTP1    |
| MOL002211 | FZ1 | FU ZI   | 2fky_v | 0.9723 | KIF11_HUMAN | KIF11    |
| MOL002211 | FZ1 | FU ZI   | 1pme_v | 0.9979 | MK01_HUMAN  | MAPK1    |
| MOL002211 | FZ1 | FU ZI   | 3cgf_v | 0.9107 | MK10_HUMAN  | MAPK10   |
| MOL002211 | FZ1 | FU ZI   | 1eub_v | 0.9886 | MMP13_HUMAN | MMP13    |
| MOL002211 | FZ1 | FU ZI   | 1qq5_v | 0.9827 | NGAL_HUMAN  | LCN2     |
| MOL002211 | FZ1 | FU ZI   | 1xv9_v | 0.9828 | NR1I3_HUMAN | NR1I3    |
| MOL002211 | FZ1 | FU ZI   | 2pin_v | 0.9618 | P10828      | THRB     |
| MOL002211 | FZ1 | FU ZI   | 3bgp_v | 0.9905 | P11309      | PIM1     |
| MOL002211 | FZ1 | FU ZI   | 3eqm_v | 0.9827 | P11511      | CYP19A1  |
| MOL002211 | FZ1 | FU ZI   | 1e1x_v | 0.9895 | P24941      | CDK2     |
| MOL002211 | FZ1 | FU ZI   | 3cjf_v | 0.9105 | P35968      | KDR      |
| MOL002211 | FZ1 | FU ZI   | 2jbp_v | 0.9974 | P49137      | 1APKAPK2 |
| MOL002211 | FZ1 | FU ZI   | 1oni_v | 0.9578 | P52758      | RIDA     |
| MOL002211 | FZ1 | FU ZI   | 1w8l_v | 0.9748 | P62937      | PPIA     |

|           |      |       |        |        |             |          |
|-----------|------|-------|--------|--------|-------------|----------|
| MOL002211 | FZ1  | FU ZI | 1zgy_v | 0.9465 | PPARG_HUMAN | PPARG    |
| MOL002211 | FZ1  | FU ZI | 1hd2_v | 0.9666 | PRDX5_HUMAN | PRDX5    |
| MOL002211 | FZ1  | FU ZI | 2ovm_v | 0.9603 | PRGR_HUMAN  | PGR      |
| MOL002211 | FZ1  | FU ZI | 2f6t_v | 0.9937 | PTN1_HUMAN  | PTPN1    |
| MOL002211 | FZ1  | FU ZI | 1p49_v | 0.9693 | STS_HUMAN   | STS      |
| MOL002211 | FZ1  | FU ZI | 1f86_v | 0.9931 | TTHY_HUMAN  | TTR      |
| MOL002211 | FZ1  | FU ZI | 1j78_v | 0.9172 | VTDB_HUMAN  | GC       |
| MOL002406 | FZ10 | FU ZI | 1reu_v | 0.9386 | BMP2_HUMAN  | BMP2     |
| MOL002406 | FZ10 | FU ZI | 1rs0_v | 0.9551 | CFAB_HUMAN  | CFB      |
| MOL002406 | FZ10 | FU ZI | 1pmv_v | 0.9807 | MK10_HUMAN  | MAPK10   |
| MOL002406 | FZ10 | FU ZI | 1eub_v | 0.9462 | MMP13_HUMAN | MMP13    |
| MOL002406 | FZ10 | FU ZI | 1bm6_v | 0.9341 | MMP3_HUMAN  | MMP3     |
| MOL002406 | FZ10 | FU ZI | 1pq9_v | 0.925  | NR1H2_HUMAN | NR1H2    |
| MOL002406 | FZ10 | FU ZI | 1dvz_v | 0.9172 | TTHY_HUMAN  | TTR      |
| MOL002410 | FZ11 | FU ZI | 1j96_v | 1      | AK1C2_HUMAN | AKR1C2   |
| MOL002410 | FZ11 | FU ZI | 1e7a_v | 1      | ALBU_HUMAN  | ALB      |
| MOL002410 | FZ11 | FU ZI | 2agt_v | 0.9069 | ALDR_HUMAN  | AKR1B1   |
| MOL002410 | FZ11 | FU ZI | 1oj9_v | 1      | AOFB_HUMAN  | MAOB     |
| MOL002410 | FZ11 | FU ZI | 1l6l_v | 0.9881 | APOA2_HUMAN | APOA2    |
| MOL002410 | FZ11 | FU ZI | 2ohp_v | 0.9865 | BACE1_HUMAN | BACE1    |
| MOL002410 | FZ11 | FU ZI | 3bmp_v | 1      | BMP2_HUMAN  | BMP2     |
| MOL002410 | FZ11 | FU ZI | 1if4_v | 0.9976 | CAH2_HUMAN  | CA2      |
| MOL002410 | FZ11 | FU ZI | 3dej_v | 0.9445 | CASP3_HUMAN | CASP3    |
| MOL002410 | FZ11 | FU ZI | 1shj_v | 0.9979 | CASP7_HUMAN | CASP7    |
| MOL002410 | FZ11 | FU ZI | 1rs0_v | 0.9878 | CFAB_HUMAN  | CFB      |
| MOL002410 | FZ11 | FU ZI | 1p0i_v | 0.9778 | CHLE_HUMAN  | BCHE     |
| MOL002410 | FZ11 | FU ZI | 2vwu_v | 0.9897 | EPHB4_HUMAN | EPHB4    |
| MOL002410 | FZ11 | FU ZI | 1ya8_v | 0.9368 | EST1_HUMAN  | CES1     |
| MOL002410 | FZ11 | FU ZI | 1lbk_v | 0.939  | GSTP1_HUMAN | GSTP1    |
| MOL002410 | FZ11 | FU ZI | 2fky_v | 1      | KIF11_HUMAN | KIF11    |
| MOL002410 | FZ11 | FU ZI | 2oji_v | 0.9905 | MK01_HUMAN  | MAPK1    |
| MOL002410 | FZ11 | FU ZI | 1uki_v | 0.9672 | MK08_HUMAN  | MAPK8    |
| MOL002410 | FZ11 | FU ZI | 1pmv_v | 0.9871 | MK10_HUMAN  | MAPK10   |
| MOL002410 | FZ11 | FU ZI | 1eub_v | 1      | MMP13_HUMAN | MMP13    |
| MOL002410 | FZ11 | FU ZI | 1bm6_v | 0.9923 | MMP3_HUMAN  | MMP3     |
| MOL002410 | FZ11 | FU ZI | 1pq9_v | 0.9707 | NR1H2_HUMAN | NR1H2    |
| MOL002410 | FZ11 | FU ZI | 2jbp_v | 1      | P49137      | 1APKAPK2 |
| MOL002410 | FZ11 | FU ZI | 1w8l_v | 0.9904 | P62937      | PPIA     |
| MOL002410 | FZ11 | FU ZI | 1xoz_v | 0.9907 | PDE5A_HUMAN | PDE5A    |
| MOL002410 | FZ11 | FU ZI | 2o65_v | 1      | PIM1_HUMAN  | PIM1     |
| MOL002410 | FZ11 | FU ZI | 1hnn_v | 0.9861 | PNMT_HUMAN  | PNMT     |
| MOL002410 | FZ11 | FU ZI | 1p49_v | 1      | STS_HUMAN   | STS      |

|           |      |       |        |        |             |         |
|-----------|------|-------|--------|--------|-------------|---------|
| MOL002410 | FZ11 | FU ZI | 1no9_v | 0.9981 | THRB_HUMAN  | F2      |
| MOL002410 | FZ11 | FU ZI | 1f86_v | 0.9984 | TTHY_HUMAN  | TTR     |
| MOL002410 | FZ11 | FU ZI | 1j78_v | 1      | VTDB_HUMAN  | GC      |
| MOL002415 | FZ12 | FU ZI | 1u3u_v | 0.9218 | ADH1B_HUMAN | ADH1B   |
| MOL002415 | FZ12 | FU ZI | 2pit_v | 0.9644 | ANDR_HUMAN  | AR      |
| MOL002415 | FZ12 | FU ZI | 1lbk_v | 0.9825 | GSTP1_HUMAN | GSTP1   |
| MOL002415 | FZ12 | FU ZI | 1pq9_v | 0.9021 | NR1H2_HUMAN | NR1H2   |
| MOL002415 | FZ12 | FU ZI | 1hpk_v | 0.9729 | P00747      | PLG     |
| MOL002415 | FZ12 | FU ZI | 1qmv_v | 0.9497 | P32119      | PRDX2   |
| MOL002415 | FZ12 | FU ZI | 1w8m_v | 0.9926 | P62937      | PPIA    |
| MOL002415 | FZ12 | FU ZI | 1xn0_v | 0.9602 | PDE4B_HUMAN | PDE4B   |
| MOL002415 | FZ12 | FU ZI | 1q8m_v | 0.9627 | Q9NP99      | TREM1   |
| MOL002416 | FZ13 | FU ZI | 2pir_v | 0.9659 | ANDR_HUMAN  | AR      |
| MOL002416 | FZ13 | FU ZI | 2ohp_v | 0.9644 | BACE1_HUMAN | BACE1   |
| MOL002416 | FZ13 | FU ZI | 3bmp_v | 1      | BMP2_HUMAN  | BMP2    |
| MOL002416 | FZ13 | FU ZI | 1jd0_v | 0.9139 | CAH12_HUMAN | CA12    |
| MOL002416 | FZ13 | FU ZI | 1okl_v | 0.9873 | CAH2_HUMAN  | CA2     |
| MOL002416 | FZ13 | FU ZI | 1lyw_v | 0.9202 | CATD_HUMAN  | CTSD    |
| MOL002416 | FZ13 | FU ZI | 1md3_v | 0.9791 | GSTP1_HUMAN | GSTP1   |
| MOL002416 | FZ13 | FU ZI | 2g0l_v | 0.9737 | MK08_HUMAN  | MAPK8   |
| MOL002416 | FZ13 | FU ZI | 1pmv_v | 0.9825 | MK10_HUMAN  | MAPK10  |
| MOL002416 | FZ13 | FU ZI | 1bm6_v | 0.9896 | MMP3_HUMAN  | MMP3    |
| MOL002416 | FZ13 | FU ZI | 1pq9_v | 0.9424 | NR1H2_HUMAN | NR1H2   |
| MOL002416 | FZ13 | FU ZI | 1le6_v | 0.9348 | O15496      | PLA2G10 |
| MOL002416 | FZ13 | FU ZI | 1w8l_v | 0.9973 | P62937      | PPIA    |
| MOL002416 | FZ13 | FU ZI | 1xn0_v | 0.9268 | PDE4B_HUMAN | PDE4B   |
| MOL002416 | FZ13 | FU ZI | 2pe0_v | 0.9548 | PDPK1_HUMAN | PDPK1   |
| MOL002416 | FZ13 | FU ZI | 1yi3_v | 0.9825 | PIM1_HUMAN  | PIM1    |
| MOL002416 | FZ13 | FU ZI | 1hnn_v | 0.9106 | PNMT_HUMAN  | PNMT    |
| MOL002416 | FZ13 | FU ZI | 1v3q_v | 0.9114 | PNPH_HUMAN  | PNP     |
| MOL002416 | FZ13 | FU ZI | 1ov4_v | 0.9163 | Q06520      | SULT2A1 |
| MOL002416 | FZ13 | FU ZI | 1zyj_v | 0.9081 | Q16539      | MAPK14  |
| MOL002416 | FZ13 | FU ZI | 2p2h_v | 0.9251 | VGFR2_HUMAN | KDR     |
| MOL002416 | FZ13 | FU ZI | 1t84_v | 0.9007 | WASP_HUMAN  | WAS     |
| MOL002419 | FZ14 | FU ZI | 2oi0_v | 0.9069 | ADA17_HUMAN | ADAM17  |
| MOL002419 | FZ14 | FU ZI | 2pir_v | 0.9143 | ANDR_HUMAN  | AR      |
| MOL002419 | FZ14 | FU ZI | 2ohp_v | 0.9777 | BACE1_HUMAN | BACE1   |
| MOL002419 | FZ14 | FU ZI | 2nmx_v | 0.9726 | CAH1_HUMAN  | CA1     |
| MOL002419 | FZ14 | FU ZI | 1oq5_v | 0.941  | CAH2_HUMAN  | CA2     |
| MOL002419 | FZ14 | FU ZI | 1rs0_v | 0.9527 | CFAB_HUMAN  | CFB     |
| MOL002419 | FZ14 | FU ZI | 1xlv_v | 0.9871 | CHLE_HUMAN  | BCHE    |
| MOL002419 | FZ14 | FU ZI | 2pog_v | 0.9936 | ESR1_HUMAN  | ESR1    |



|           |      |       |        |        |             |          |
|-----------|------|-------|--------|--------|-------------|----------|
| MOL002419 | FZ14 | FU ZI | 1x7j_v | 0.965  | ESR2_HUMAN  | ESR2     |
| MOL002419 | FZ14 | FU ZI | 1lbk_v | 0.959  | GSTP1_HUMAN | GSTP1    |
| MOL002419 | FZ14 | FU ZI | 1uki_v | 0.9508 | MK08_HUMAN  | MAPK8    |
| MOL002419 | FZ14 | FU ZI | 3cgf_v | 0.993  | MK10_HUMAN  | MAPK10   |
| MOL002419 | FZ14 | FU ZI | 1pq9_v | 0.9819 | NR1H2_HUMAN | NR1H2    |
| MOL002419 | FZ14 | FU ZI | 1jvp_v | 0.9483 | P24941      | CDK2     |
| MOL002419 | FZ14 | FU ZI | 3cjf_v | 0.993  | P35968      | KDR      |
| MOL002419 | FZ14 | FU ZI | 1w8m_v | 0.9785 | P62937      | PPIA     |
| MOL002419 | FZ14 | FU ZI | 4pah_v | 0.9809 | PH4H_HUMAN  | PAH      |
| MOL002419 | FZ14 | FU ZI | 2c3i_v | 0.9892 | PIM1_HUMAN  | PIM1     |
| MOL002419 | FZ14 | FU ZI | 1hnn_v | 0.9571 | PNMT_HUMAN  | PNMT     |
| MOL002419 | FZ14 | FU ZI | 1v3q_v | 0.9387 | PNPH_HUMAN  | PNP      |
| MOL002419 | FZ14 | FU ZI | 1no9_v | 0.9838 | THRB_HUMAN  | F2       |
| MOL002419 | FZ14 | FU ZI | 1dvz_v | 0.9939 | TTHY_HUMAN  | TTR      |
| MOL002419 | FZ14 | FU ZI | 1gjd_v | 0.9787 | UROK_HUMAN  | PLAU     |
| MOL002421 | FZ15 | FU ZI | 2pit_v | 0.9888 | ANDR_HUMAN  | AR       |
| MOL002421 | FZ15 | FU ZI | 1hak_v | 0.923  | ANXA5_HUMAN | ANXA5    |
| MOL002421 | FZ15 | FU ZI | 1oj9_v | 1      | AOFB_HUMAN  | MAOB     |
| MOL002421 | FZ15 | FU ZI | 2ohq_v | 0.9138 | BACE1_HUMAN | BACE1    |
| MOL002421 | FZ15 | FU ZI | 1czm_v | 0.9851 | CAH1_HUMAN  | CA1      |
| MOL002421 | FZ15 | FU ZI | 3ca2_v | 0.9616 | CAH2_HUMAN  | CA2      |
| MOL002421 | FZ15 | FU ZI | 1rs0_v | 0.9727 | CFAB_HUMAN  | CFB      |
| MOL002421 | FZ15 | FU ZI | 2brg_v | 0.9494 | CHK1_HUMAN  | CHEK1    |
| MOL002421 | FZ15 | FU ZI | 1xlv_v | 0.9775 | CHLE_HUMAN  | BCHE     |
| MOL002421 | FZ15 | FU ZI | 1klt_v | 0.9229 | CMA1_HUMAN  | CMA1     |
| MOL002421 | FZ15 | FU ZI | 2onc_v | 0.919  | DPP4_HUMAN  | DPP4     |
| MOL002421 | FZ15 | FU ZI | 1ya8_v | 0.9497 | EST1_HUMAN  | CES1     |
| MOL002421 | FZ15 | FU ZI | 1lbk_v | 0.9657 | GSTP1_HUMAN | GSTP1    |
| MOL002421 | FZ15 | FU ZI | 1g1q_v | 0.9582 | LYAM3_HUMAN | SELP     |
| MOL002421 | FZ15 | FU ZI | 2h96_v | 0.9092 | MK08_HUMAN  | MAPK8    |
| MOL002421 | FZ15 | FU ZI | 1pmv_v | 0.9915 | MK10_HUMAN  | MAPK10   |
| MOL002421 | FZ15 | FU ZI | 1eub_v | 1      | MMP13_HUMAN | MMP13    |
| MOL002421 | FZ15 | FU ZI | 1bm6_v | 0.964  | MMP3_HUMAN  | MMP3     |
| MOL002421 | FZ15 | FU ZI | 1pq9_v | 0.9769 | NR1H2_HUMAN | NR1H2    |
| MOL002421 | FZ15 | FU ZI | 1hpk_v | 0.9654 | P00747      | PLG      |
| MOL002421 | FZ15 | FU ZI | 2pin_v | 1      | P10828      | THRB     |
| MOL002421 | FZ15 | FU ZI | 2jbp_v | 0.9707 | P49137      | 1APKAPK2 |
| MOL002421 | FZ15 | FU ZI | 1w8m_v | 0.9823 | P62937      | PPIA     |
| MOL002421 | FZ15 | FU ZI | 1xlz_v | 0.9132 | PDE4B_HUMAN | PDE4B    |
| MOL002421 | FZ15 | FU ZI | 2pe0_v | 0.9007 | PDPK1_HUMAN | PDPK1    |
| MOL002421 | FZ15 | FU ZI | 1v3q_v | 0.9764 | PNPH_HUMAN  | PNP      |
| MOL002421 | FZ15 | FU ZI | 1zyj_v | 0.9164 | Q16539      | MAPK14   |

|           |      |       |        |        |             |         |
|-----------|------|-------|--------|--------|-------------|---------|
| MOL002421 | FZ15 | FU ZI | 1nub_v | 0.9365 | SPRC_HUMAN  | SPARC   |
| MOL002421 | FZ15 | FU ZI | 2h8h_v | 0.9422 | SRC_HUMAN   | SRC     |
| MOL002421 | FZ15 | FU ZI | 1vjy_v | 0.9127 | TGFR1_HUMAN | TGFBRI  |
| MOL002421 | FZ15 | FU ZI | 1no9_v | 0.9633 | THRB_HUMAN  | F2      |
| MOL002421 | FZ15 | FU ZI | 1f86_v | 1      | TTHY_HUMAN  | TTR     |
| MOL002422 | FZ16 | FU ZI | 1j96_v | 1      | AK1C2_HUMAN | AKR1C2  |
| MOL002422 | FZ16 | FU ZI | 1reu_v | 1      | BMP2_HUMAN  | BMP2    |
| MOL002422 | FZ16 | FU ZI | 1okl_v | 0.9899 | CAH2_HUMAN  | CA2     |
| MOL002422 | FZ16 | FU ZI | 1lyw_v | 0.9511 | CATD_HUMAN  | CTSD    |
| MOL002422 | FZ16 | FU ZI | 1s3w_v | 0.9209 | DYR_HUMAN   | DHFR    |
| MOL002422 | FZ16 | FU ZI | 3bgq_v | 0.927  | P11309      | PIM1    |
| MOL002422 | FZ16 | FU ZI | 1w8m_v | 0.9422 | P62937      | PPIA    |
| MOL002422 | FZ16 | FU ZI | 1a28_v | 0.9784 | PRGR_HUMAN  | PGR     |
| MOL002422 | FZ16 | FU ZI | 1q8m_v | 0.9399 | Q9NP99      | TREM1   |
| MOL002422 | FZ16 | FU ZI | 1ijn_v | 0.9147 | TTHY_HUMAN  | TTR     |
| MOL002423 | FZ17 | FU ZI | 2bx8_v | 0.9991 | ALBU_HUMAN  | ALB     |
| MOL002423 | FZ17 | FU ZI | 2pdw_v | 0.9223 | ALDR_HUMAN  | AKR1B1  |
| MOL002423 | FZ17 | FU ZI | 1oj9_v | 1      | AOFB_HUMAN  | MAOB    |
| MOL002423 | FZ17 | FU ZI | 2ohq_v | 0.9872 | BACE1_HUMAN | BACE1   |
| MOL002423 | FZ17 | FU ZI | 1czm_v | 0.969  | CAH1_HUMAN  | CA1     |
| MOL002423 | FZ17 | FU ZI | 1if4_v | 0.9973 | CAH2_HUMAN  | CA2     |
| MOL002423 | FZ17 | FU ZI | 2uzd_v | 0.9679 | CCNA2_HUMAN | CCNA2   |
| MOL002423 | FZ17 | FU ZI | 1rs0_v | 0.9774 | CFAB_HUMAN  | CFB     |
| MOL002423 | FZ17 | FU ZI | 1dic_v | 0.9219 | CFAD_HUMAN  | CFD     |
| MOL002423 | FZ17 | FU ZI | 2ywp_v | 0.9588 | CHK1_HUMAN  | CHEK1   |
| MOL002423 | FZ17 | FU ZI | 1p0i_v | 0.9554 | CHLE_HUMAN  | BCHE    |
| MOL002423 | FZ17 | FU ZI | 1n1m_v | 0.958  | DPP4_HUMAN  | DPP4    |
| MOL002423 | FZ17 | FU ZI | 1qkt_v | 0.9846 | ESR1_HUMAN  | ESR1    |
| MOL002423 | FZ17 | FU ZI | 1qkm_v | 0.973  | ESR2_HUMAN  | ESR2    |
| MOL002423 | FZ17 | FU ZI | 1ogs_v | 0.984  | GLCM_HUMAN  | GBA     |
| MOL002423 | FZ17 | FU ZI | 1lbk_v | 0.9863 | GSTP1_HUMAN | GSTP1   |
| MOL002423 | FZ17 | FU ZI | 2fky_v | 0.9211 | KIF11_HUMAN | KIF11   |
| MOL002423 | FZ17 | FU ZI | 1uki_v | 0.9841 | MK08_HUMAN  | MAPK8   |
| MOL002423 | FZ17 | FU ZI | 1pmv_v | 0.9847 | MK10_HUMAN  | MAPK10  |
| MOL002423 | FZ17 | FU ZI | 1bm6_v | 0.997  | MMP3_HUMAN  | MMP3    |
| MOL002423 | FZ17 | FU ZI | 1pq9_v | 0.9357 | NR1H2_HUMAN | NR1H2   |
| MOL002423 | FZ17 | FU ZI | 1osh_v | 0.9027 | NR1H4_HUMAN | NR1H4   |
| MOL002423 | FZ17 | FU ZI | 1o6u_v | 1      | O76054      | SEC14L2 |
| MOL002423 | FZ17 | FU ZI | 1xan_v | 0.9145 | P00390      | GSR     |
| MOL002423 | FZ17 | FU ZI | 1hpk_v | 0.9878 | P00747      | PLG     |
| MOL002423 | FZ17 | FU ZI | 3fzk_v | 0.9245 | P11142      | HSPA8   |
| MOL002423 | FZ17 | FU ZI | 1qyw_v | 0.9953 | P14061      | HSD17B1 |

|           |      |       |        |        |             |          |
|-----------|------|-------|--------|--------|-------------|----------|
| MOL002423 | FZ17 | FU ZI | 2rl5_v | 0.9516 | P35968      | KDR      |
| MOL002423 | FZ17 | FU ZI | 2zkc_v | 0.9291 | P62508      | ESRRG    |
| MOL002423 | FZ17 | FU ZI | 1w8l_v | 0.9895 | P62937      | PPIA     |
| MOL002423 | FZ17 | FU ZI | 1xn0_v | 0.9482 | PDE4B_HUMAN | PDE4B    |
| MOL002423 | FZ17 | FU ZI | 1xor_v | 0.9683 | PDE4D_HUMAN | PDE4D    |
| MOL002423 | FZ17 | FU ZI | 2pe0_v | 0.9073 | PDPK1_HUMAN | PDPK1    |
| MOL002423 | FZ17 | FU ZI | 1yi3_v | 0.9958 | PIM1_HUMAN  | PIM1     |
| MOL002423 | FZ17 | FU ZI | 1hnn_v | 0.9487 | PNMT_HUMAN  | PNMT     |
| MOL002423 | FZ17 | FU ZI | 1v3q_v | 0.9736 | PNPH_HUMAN  | PNP      |
| MOL002423 | FZ17 | FU ZI | 1fm6_v | 0.9914 | PPARG_HUMAN | PPARG    |
| MOL002423 | FZ17 | FU ZI | 1a28_v | 0.9681 | PRGR_HUMAN  | PGR      |
| MOL002423 | FZ17 | FU ZI | 1ov4_v | 0.9939 | Q06520      | SULT2A1  |
| MOL002423 | FZ17 | FU ZI | 1bmk_v | 0.9369 | Q16539      | MAPK14   |
| MOL002423 | FZ17 | FU ZI | 1n83_v | 0.9909 | RORA_HUMAN  | RORA     |
| MOL002423 | FZ17 | FU ZI | 1lhv_v | 0.9089 | SHBG_HUMAN  | SHBG     |
| MOL002423 | FZ17 | FU ZI | 1dvz_v | 0.991  | TTHY_HUMAN  | TTR      |
| MOL002423 | FZ17 | FU ZI | 1j78_v | 1      | VTDB_HUMAN  | GC       |
| MOL002423 | FZ17 | FU ZI | 1t84_v | 0.9685 | WASP_HUMAN  | WAS      |
| MOL002433 | FZ18 | FU ZI | 1j96_v | 0.9197 | AK1C2_HUMAN | AKR1C2   |
| MOL002433 | FZ18 | FU ZI | 1e7e_v | 0.9348 | ALBU_HUMAN  | ALB      |
| MOL002433 | FZ18 | FU ZI | 1jdn_v | 0.9497 | ANPRC_HUMAN | NPR3     |
| MOL002433 | FZ18 | FU ZI | 1oj9_v | 0.9716 | AOFB_HUMAN  | MAOB     |
| MOL002433 | FZ18 | FU ZI | 1l6l_v | 0.9329 | APOA2_HUMAN | APOA2    |
| MOL002433 | FZ18 | FU ZI | 2ohs_v | 0.989  | BACE1_HUMAN | BACE1    |
| MOL002433 | FZ18 | FU ZI | 3bmp_v | 0.9533 | BMP2_HUMAN  | BMP2     |
| MOL002433 | FZ18 | FU ZI | 1okl_v | 0.971  | CAH2_HUMAN  | CA2      |
| MOL002433 | FZ18 | FU ZI | 1shj_v | 0.9349 | CASP7_HUMAN | CASP7    |
| MOL002433 | FZ18 | FU ZI | 2f1g_v | 0.9651 | CATS_HUMAN  | CTSS     |
| MOL002433 | FZ18 | FU ZI | 1xlw_v | 0.9397 | CHLE_HUMAN  | BCHE     |
| MOL002433 | FZ18 | FU ZI | 1yb1_v | 0.9671 | DHB11_HUMAN | HSD17B11 |
| MOL002433 | FZ18 | FU ZI | 3czt_v | 0.9113 | DHI1_HUMAN  | HSD11B1  |
| MOL002433 | FZ18 | FU ZI | 2itx_v | 0.9447 | EGFR_HUMAN  | EGFR     |
| MOL002433 | FZ18 | FU ZI | 1qkm_v | 0.9542 | ESR2_HUMAN  | ESR2     |
| MOL002433 | FZ18 | FU ZI | 1d7i_v | 0.9245 | FKB1A_HUMAN | FKBP1A   |
| MOL002433 | FZ18 | FU ZI | 1ogs_v | 0.9817 | GLCM_HUMAN  | GBA      |
| MOL002433 | FZ18 | FU ZI | 1md3_v | 0.9146 | GSTP1_HUMAN | GSTP1    |
| MOL002433 | FZ18 | FU ZI | 2pg2_v | 0.9188 | KIF11_HUMAN | KIF11    |
| MOL002433 | FZ18 | FU ZI | 2oji_v | 0.9593 | MK01_HUMAN  | MAPK1    |
| MOL002433 | FZ18 | FU ZI | 2gmx_v | 0.9216 | MK08_HUMAN  | MAPK8    |
| MOL002433 | FZ18 | FU ZI | 1pmv_v | 0.9621 | MK10_HUMAN  | MAPK10   |
| MOL002433 | FZ18 | FU ZI | 1smd_v | 0.9455 | P04745      | AMY1A    |
| MOL002433 | FZ18 | FU ZI | 2pin_v | 0.9176 | P10828      | THRB     |

|           |      |       |        |        |             |          |
|-----------|------|-------|--------|--------|-------------|----------|
| MOL002433 | FZ18 | FU ZI | 3fzh_v | 0.9013 | P11142      | HSPA8    |
| MOL002433 | FZ18 | FU ZI | 3bgp_v | 0.9875 | P11309      | PIM1     |
| MOL002433 | FZ18 | FU ZI | 1w8l_v | 0.9758 | P62937      | PPIA     |
| MOL002433 | FZ18 | FU ZI | 1xn0_v | 0.937  | PDE4B_HUMAN | PDE4B    |
| MOL002433 | FZ18 | FU ZI | 1cb0_v | 0.905  | Q13126      | MTAP     |
| MOL002433 | FZ18 | FU ZI | 1q33_v | 0.965  | Q9BW91      | NUDT9    |
| MOL002433 | FZ18 | FU ZI | 1z68_v | 0.9822 | SEPR_HUMAN  | FAP      |
| MOL002433 | FZ18 | FU ZI | 1p49_v | 0.9722 | STS_HUMAN   | STS      |
| MOL002433 | FZ18 | FU ZI | 1m9z_v | 0.9321 | TGFR2_HUMAN | TGFBR2   |
| MOL002433 | FZ18 | FU ZI | 2roy_v | 0.9871 | TTHY_HUMAN  | TTR      |
| MOL002433 | FZ18 | FU ZI | 1fv9_v | 0.9126 | UROK_HUMAN  | PLAU     |
| MOL002433 | FZ18 | FU ZI | 1j78_v | 0.9405 | VTDB_HUMAN  | GC       |
| MOL002434 | FZ19 | FU ZI | 1j96_v | 0.9946 | AK1C2_HUMAN | AKR1C2   |
| MOL002434 | FZ19 | FU ZI | 1e7e_v | 0.9347 | ALBU_HUMAN  | ALB      |
| MOL002434 | FZ19 | FU ZI | 1x97_v | 0.9623 | ALDR_HUMAN  | AKR1B1   |
| MOL002434 | FZ19 | FU ZI | 2q7j_v | 0.925  | ANDR_HUMAN  | AR       |
| MOL002434 | FZ19 | FU ZI | 1oj9_v | 0.9026 | AOFB_HUMAN  | MAOB     |
| MOL002434 | FZ19 | FU ZI | 1l6l_v | 0.9696 | APOA2_HUMAN | APOA2    |
| MOL002434 | FZ19 | FU ZI | 1reu_v | 0.9644 | BMP2_HUMAN  | BMP2     |
| MOL002434 | FZ19 | FU ZI | 1okl_v | 0.9466 | CAH2_HUMAN  | CA2      |
| MOL002434 | FZ19 | FU ZI | 1shj_v | 0.9016 | CASP7_HUMAN | CASP7    |
| MOL002434 | FZ19 | FU ZI | 1tg6_v | 0.9878 | CLPP_HUMAN  | CLPP     |
| MOL002434 | FZ19 | FU ZI | 1yb1_v | 0.9843 | DHB11_HUMAN | HSD17B11 |
| MOL002434 | FZ19 | FU ZI | 3czz_v | 0.9032 | DHI1_HUMAN  | HSD11B1  |
| MOL002434 | FZ19 | FU ZI | 2vwu_v | 0.9695 | EPHB4_HUMAN | EPHB4    |
| MOL002434 | FZ19 | FU ZI | 1ya8_v | 0.9529 | EST1_HUMAN  | CES1     |
| MOL002434 | FZ19 | FU ZI | 2pg2_v | 0.9094 | KIF11_HUMAN | KIF11    |
| MOL002434 | FZ19 | FU ZI | 2oji_v | 0.9412 | MK01_HUMAN  | MAPK1    |
| MOL002434 | FZ19 | FU ZI | 2pin_v | 0.9307 | P10828      | THRB     |
| MOL002434 | FZ19 | FU ZI | 3bgp_v | 0.9819 | P11309      | PIM1     |
| MOL002434 | FZ19 | FU ZI | 3eqm_v | 0.9574 | P11511      | CYP19A1  |
| MOL002434 | FZ19 | FU ZI | 2p3g_v | 0.9531 | P49137      | 1APKAPK2 |
| MOL002434 | FZ19 | FU ZI | 1zgy_v | 0.9142 | PPARG_HUMAN | PPARG    |
| MOL002434 | FZ19 | FU ZI | 2ovm_v | 0.9456 | PRGR_HUMAN  | PGR      |
| MOL002434 | FZ19 | FU ZI | 1bl6_v | 0.9048 | Q16539      | MAPK14   |
| MOL002434 | FZ19 | FU ZI | 1tt6_v | 0.9363 | TTHY_HUMAN  | TTR      |
| MOL002388 | FZ2  | FU ZI | 2pio_v | 0.937  | ANDR_HUMAN  | AR       |
| MOL002388 | FZ2  | FU ZI | 1czm_v | 0.9504 | CAH1_HUMAN  | CA1      |
| MOL002388 | FZ2  | FU ZI | 1cnx_v | 0.962  | CAH2_HUMAN  | CA2      |
| MOL002388 | FZ2  | FU ZI | 1h1p_v | 0.9398 | CCNA2_HUMAN | CCNA2    |
| MOL002388 | FZ2  | FU ZI | 1p0i_v | 0.9765 | CHLE_HUMAN  | BCHE     |
| MOL002388 | FZ2  | FU ZI | 1x7r_v | 0.9576 | ESR1_HUMAN  | ESR1     |

|           |      |       |        |        |             |          |
|-----------|------|-------|--------|--------|-------------|----------|
| MOL002388 | FZ2  | FU ZI | 1qkm_v | 0.9634 | ESR2_HUMAN  | ESR2     |
| MOL002388 | FZ2  | FU ZI | 1lbk_v | 0.9527 | GSTP1_HUMAN | GSTP1    |
| MOL002388 | FZ2  | FU ZI | 2hck_v | 0.9905 | HCK_HUMAN   | HCK      |
| MOL002388 | FZ2  | FU ZI | 1mfu_v | 0.9278 | P04745      | AMY1A    |
| MOL002388 | FZ2  | FU ZI | 1e1x_v | 0.9336 | P24941      | CDK2     |
| MOL002388 | FZ2  | FU ZI | 1w8l_v | 0.9638 | P62937      | PPIA     |
| MOL002388 | FZ2  | FU ZI | 2o63_v | 0.9872 | PIM1_HUMAN  | PIM1     |
| MOL002388 | FZ2  | FU ZI | 1q33_v | 0.9344 | Q9BW91      | NUDT9    |
| MOL002388 | FZ2  | FU ZI | 1m9z_v | 0.9174 | TGFR2_HUMAN | TGFR2    |
| MOL000538 | FZ20 | FU ZI | 2bx8_v | 0.9212 | ALBU_HUMAN  | ALB      |
| MOL000538 | FZ20 | FU ZI | 2ama_v | 0.9343 | ANDR_HUMAN  | AR       |
| MOL000538 | FZ20 | FU ZI | 1oj9_v | 0.9112 | AOFB_HUMAN  | MAOB     |
| MOL000538 | FZ20 | FU ZI | 3bmp_v | 1      | BMP2_HUMAN  | BMP2     |
| MOL000538 | FZ20 | FU ZI | 1if4_v | 0.9916 | CAH2_HUMAN  | CA2      |
| MOL000538 | FZ20 | FU ZI | 2uzd_v | 0.9417 | CCNA2_HUMAN | CCNA2    |
| MOL000538 | FZ20 | FU ZI | 1dic_v | 0.9732 | CFAD_HUMAN  | CFD      |
| MOL000538 | FZ20 | FU ZI | 1xkb_v | 0.9097 | FA10_HUMAN  | F10      |
| MOL000538 | FZ20 | FU ZI | 1uki_v | 0.9705 | MK08_HUMAN  | MAPK8    |
| MOL000538 | FZ20 | FU ZI | 1pmv_v | 0.9452 | MK10_HUMAN  | MAPK10   |
| MOL000538 | FZ20 | FU ZI | 1pq9_v | 0.9378 | NR1H2_HUMAN | NR1H2    |
| MOL000538 | FZ20 | FU ZI | 1o6u_v | 0.9174 | O76054      | SEC14L2  |
| MOL000538 | FZ20 | FU ZI | 1hpk_v | 0.972  | P00747      | PLG      |
| MOL000538 | FZ20 | FU ZI | 1qmv_v | 0.9254 | P32119      | PRDX2    |
| MOL000538 | FZ20 | FU ZI | 1xlz_v | 0.9751 | PDE4B_HUMAN | PDE4B    |
| MOL000538 | FZ20 | FU ZI | 1fm6_v | 0.9001 | PPARG_HUMAN | PPARG    |
| MOL000538 | FZ20 | FU ZI | 1ov4_v | 0.9013 | Q06520      | SULT2A1  |
| MOL000538 | FZ20 | FU ZI | 1cb0_v | 0.9325 | Q13126      | MTAP     |
| MOL000538 | FZ20 | FU ZI | 1iii_v | 0.9419 | TTHY_HUMAN  | TTR      |
| MOL002392 | FZ3  | FU ZI | 1j96_v | 0.9888 | AK1C2_HUMAN | AKR1C2   |
| MOL002392 | FZ3  | FU ZI | 1xf0_v | 0.9034 | AK1C3_HUMAN | AKR1C3   |
| MOL002392 | FZ3  | FU ZI | 1e7a_v | 0.9982 | ALBU_HUMAN  | ALB      |
| MOL002392 | FZ3  | FU ZI | 1x97_v | 0.9573 | ALDR_HUMAN  | AKR1B1   |
| MOL002392 | FZ3  | FU ZI | 1xow_v | 0.9277 | ANDR_HUMAN  | AR       |
| MOL002392 | FZ3  | FU ZI | 1reu_v | 0.9685 | BMP2_HUMAN  | BMP2     |
| MOL002392 | FZ3  | FU ZI | 1okl_v | 0.9834 | CAH2_HUMAN  | CA2      |
| MOL002392 | FZ3  | FU ZI | 1gfw_v | 0.9972 | CASP3_HUMAN | CASP3    |
| MOL002392 | FZ3  | FU ZI | 1rs0_v | 0.9787 | CFAB_HUMAN  | CFB      |
| MOL002392 | FZ3  | FU ZI | 2oax_v | 0.9486 | MCR_HUMAN   | NR3C2    |
| MOL002392 | FZ3  | FU ZI | 2oji_v | 0.9164 | MK01_HUMAN  | MAPK1    |
| MOL002392 | FZ3  | FU ZI | 1pmv_v | 0.955  | MK10_HUMAN  | MAPK10   |
| MOL002392 | FZ3  | FU ZI | 2p3g_v | 0.9203 | P49137      | 1APKAPK2 |
| MOL002392 | FZ3  | FU ZI | 1w8l_v | 0.9919 | P62937      | PPIA     |

|           |     |       |        |        |             |        |
|-----------|-----|-------|--------|--------|-------------|--------|
| MOL002392 | FZ3 | FU ZI | 2o65_v | 0.9972 | PIM1_HUMAN  | PIM1   |
| MOL002392 | FZ3 | FU ZI | 1v3q_v | 0.945  | PNPH_HUMAN  | PNP    |
| MOL002392 | FZ3 | FU ZI | 1dvz_v | 0.9698 | TTHY_HUMAN  | TTR    |
| MOL002393 | FZ4 | FU ZI | 2ama_v | 0.9346 | ANDR_HUMAN  | AR     |
| MOL002393 | FZ4 | FU ZI | 1reu_v | 1      | BMP2_HUMAN  | BMP2   |
| MOL002393 | FZ4 | FU ZI | 1czm_v | 0.9723 | CAH1_HUMAN  | CA1    |
| MOL002393 | FZ4 | FU ZI | 1jd0_v | 0.9621 | CAH12_HUMAN | CA12   |
| MOL002393 | FZ4 | FU ZI | 1if8_v | 0.973  | CAH2_HUMAN  | CA2    |
| MOL002393 | FZ4 | FU ZI | 1gfw_v | 0.9124 | CASP3_HUMAN | CASP3  |
| MOL002393 | FZ4 | FU ZI | 1lyw_v | 0.9148 | CATD_HUMAN  | CTSD   |
| MOL002393 | FZ4 | FU ZI | 1p0i_v | 0.991  | CHLE_HUMAN  | BCHE   |
| MOL002393 | FZ4 | FU ZI | 1qkt_v | 0.9268 | ESR1_HUMAN  | ESR1   |
| MOL002393 | FZ4 | FU ZI | 1mx1_v | 0.9641 | EST1_HUMAN  | CES1   |
| MOL002393 | FZ4 | FU ZI | 1tow_v | 0.9332 | FABP4_HUMAN | FABP4  |
| MOL002393 | FZ4 | FU ZI | 7jdw_v | 0.9893 | GATM_HUMAN  | GATM   |
| MOL002393 | FZ4 | FU ZI | 1ogs_v | 0.9161 | GLCM_HUMAN  | GBA    |
| MOL002393 | FZ4 | FU ZI | 1lbk_v | 0.9776 | GSTP1_HUMAN | GSTP1  |
| MOL002393 | FZ4 | FU ZI | 2g01_v | 0.9116 | MK08_HUMAN  | MAPK8  |
| MOL002393 | FZ4 | FU ZI | 1pmv_v | 0.9438 | MK10_HUMAN  | MAPK10 |
| MOL002393 | FZ4 | FU ZI | 830c_v | 0.9415 | MMP13_HUMAN | MMP13  |
| MOL002393 | FZ4 | FU ZI | 1bm6_v | 0.9474 | MMP3_HUMAN  | MMP3   |
| MOL002393 | FZ4 | FU ZI | 1qq5_v | 0.9985 | NGAL_HUMAN  | LCN2   |
| MOL002393 | FZ4 | FU ZI | 1pq9_v | 0.9631 | NR1H2_HUMAN | NR1H2  |
| MOL002393 | FZ4 | FU ZI | 1w8m_v | 0.9869 | P62937      | PPIA   |
| MOL002393 | FZ4 | FU ZI | 1xlz_v | 0.9037 | PDE4B_HUMAN | PDE4B  |
| MOL002393 | FZ4 | FU ZI | 1yi3_v | 0.9788 | PIM1_HUMAN  | PIM1   |
| MOL002393 | FZ4 | FU ZI | 1v3q_v | 0.9526 | PNPH_HUMAN  | PNP    |
| MOL002393 | FZ4 | FU ZI | 1fm6_v | 0.9809 | PPARG_HUMAN | PPARG  |
| MOL002393 | FZ4 | FU ZI | 1a28_v | 0.9093 | PRGR_HUMAN  | PGR    |
| MOL002393 | FZ4 | FU ZI | 1w84_v | 0.903  | Q16539      | MAPK14 |
| MOL002393 | FZ4 | FU ZI | 2roy_v | 0.9418 | TTHY_HUMAN  | TTR    |
| MOL002394 | FZ5 | FU ZI | 2pit_v | 0.967  | ANDR_HUMAN  | AR     |
| MOL002394 | FZ5 | FU ZI | 1reu_v | 1      | BMP2_HUMAN  | BMP2   |
| MOL002394 | FZ5 | FU ZI | 1czm_v | 0.9702 | CAH1_HUMAN  | CA1    |
| MOL002394 | FZ5 | FU ZI | 1if8_v | 0.9899 | CAH2_HUMAN  | CA2    |
| MOL002394 | FZ5 | FU ZI | 1gfw_v | 0.9637 | CASP3_HUMAN | CASP3  |
| MOL002394 | FZ5 | FU ZI | 1fh0_v | 0.9657 | CATL2_HUMAN | CTSV   |
| MOL002394 | FZ5 | FU ZI | 1rs0_v | 0.9411 | CFAB_HUMAN  | CFB    |
| MOL002394 | FZ5 | FU ZI | 1dic_v | 0.9553 | CFAD_HUMAN  | CFD    |
| MOL002394 | FZ5 | FU ZI | 1p0i_v | 0.9812 | CHLE_HUMAN  | BCHE   |
| MOL002394 | FZ5 | FU ZI | 1vec_v | 0.9056 | DDX6_HUMAN  | DDX6   |
| MOL002394 | FZ5 | FU ZI | 2vwu_v | 0.9348 | EPHB4_HUMAN | EPHB4  |

|           |     |       |        |        |             |         |
|-----------|-----|-------|--------|--------|-------------|---------|
| MOL002394 | FZ5 | FU ZI | 1mx1_v | 0.9818 | EST1_HUMAN  | CES1    |
| MOL002394 | FZ5 | FU ZI | 2bq7_v | 0.9219 | FA10_HUMAN  | F10     |
| MOL002394 | FZ5 | FU ZI | 7jdw_v | 0.9884 | GATM_HUMAN  | GATM    |
| MOL002394 | FZ5 | FU ZI | 1ogs_v | 0.9143 | GLCM_HUMAN  | GBA     |
| MOL002394 | FZ5 | FU ZI | 20gs_v | 0.9722 | GSTP1_HUMAN | GSTP1   |
| MOL002394 | FZ5 | FU ZI | 1pmv_v | 0.996  | MK10_HUMAN  | MAPK10  |
| MOL002394 | FZ5 | FU ZI | 1bm6_v | 0.9607 | MMP3_HUMAN  | MMP3    |
| MOL002394 | FZ5 | FU ZI | 1qqs_v | 0.9714 | NGAL_HUMAN  | LCN2    |
| MOL002394 | FZ5 | FU ZI | 1pq9_v | 0.9572 | NR1H2_HUMAN | NR1H2   |
| MOL002394 | FZ5 | FU ZI | 3fzk_v | 0.9124 | P11142      | HSPA8   |
| MOL002394 | FZ5 | FU ZI | 3eqm_v | 0.952  | P11511      | CYP19A1 |
| MOL002394 | FZ5 | FU ZI | 2vth_v | 0.9482 | P24941      | CDK2    |
| MOL002394 | FZ5 | FU ZI | 1w8l_v | 0.9521 | P62937      | PPIA    |
| MOL002394 | FZ5 | FU ZI | 1xn0_v | 0.911  | PDE4B_HUMAN | PDE4B   |
| MOL002394 | FZ5 | FU ZI | 1yi3_v | 0.989  | PIM1_HUMAN  | PIM1    |
| MOL002394 | FZ5 | FU ZI | 1fm6_v | 0.9836 | PPARG_HUMAN | PPARG   |
| MOL002394 | FZ5 | FU ZI | 1hd2_v | 0.9626 | PRDX5_HUMAN | PRDX5   |
| MOL002394 | FZ5 | FU ZI | 1a28_v | 0.9016 | PRGR_HUMAN  | PGR     |
| MOL002394 | FZ5 | FU ZI | 1z68_v | 0.9535 | SEPR_HUMAN  | FAP     |
| MOL002394 | FZ5 | FU ZI | 1m9z_v | 0.9244 | TGFR2_HUMAN | TGFBR2  |
| MOL002394 | FZ5 | FU ZI | 1no9_v | 0.9921 | THRB_HUMAN  | F2      |
| MOL002394 | FZ5 | FU ZI | 1pk2_v | 0.9146 | TPA_HUMAN   | PLAT    |
| MOL002394 | FZ5 | FU ZI | 2roy_v | 0.9821 | TTHY_HUMAN  | TTR     |
| MOL002395 | FZ6 | FU ZI | 1j96_v | 1      | AK1C2_HUMAN | AKR1C2  |
| MOL002395 | FZ6 | FU ZI | 1e7e_v | 1      | ALBU_HUMAN  | ALB     |
| MOL002395 | FZ6 | FU ZI | 1x97_v | 0.9155 | ALDR_HUMAN  | AKR1B1  |
| MOL002395 | FZ6 | FU ZI | 1l6l_v | 0.9766 | APOA2_HUMAN | APOA2   |
| MOL002395 | FZ6 | FU ZI | 1reu_v | 0.9323 | BMP2_HUMAN  | BMP2    |
| MOL002395 | FZ6 | FU ZI | 1okl_v | 0.9885 | CAH2_HUMAN  | CA2     |
| MOL002395 | FZ6 | FU ZI | 3dej_v | 0.9716 | CASP3_HUMAN | CASP3   |
| MOL002395 | FZ6 | FU ZI | 1lyw_v | 0.9405 | CATD_HUMAN  | CTSD    |
| MOL002395 | FZ6 | FU ZI | 2uzd_v | 0.9402 | CCNA2_HUMAN | CCNA2   |
| MOL002395 | FZ6 | FU ZI | 2brg_v | 0.9292 | CHK1_HUMAN  | CHEK1   |
| MOL002395 | FZ6 | FU ZI | 1p0i_v | 0.9679 | CHLE_HUMAN  | BCHE    |
| MOL002395 | FZ6 | FU ZI | 1klt_v | 0.9693 | CMA1_HUMAN  | CMA1    |
| MOL002395 | FZ6 | FU ZI | 1ya8_v | 0.9722 | EST1_HUMAN  | CES1    |
| MOL002395 | FZ6 | FU ZI | 1lbk_v | 0.9905 | GSTP1_HUMAN | GSTP1   |
| MOL002395 | FZ6 | FU ZI | 2oji_v | 0.9697 | MK01_HUMAN  | MAPK1   |
| MOL002395 | FZ6 | FU ZI | 2pin_v | 0.9327 | P10828      | THRB    |
| MOL002395 | FZ6 | FU ZI | 2obj_v | 0.984  | P11309      | PIM1    |
| MOL002395 | FZ6 | FU ZI | 3eqm_v | 0.9033 | P11511      | CYP19A1 |
| MOL002395 | FZ6 | FU ZI | 1w8l_v | 0.9765 | P62937      | PPIA    |

|           |     |       |        |        |             |          |
|-----------|-----|-------|--------|--------|-------------|----------|
| MOL002395 | FZ6 | FU ZI | 1v3q_v | 0.94   | PNPH_HUMAN  | PNP      |
| MOL002395 | FZ6 | FU ZI | 1zuc_v | 0.9274 | PRGR_HUMAN  | PGR      |
| MOL002395 | FZ6 | FU ZI | 1p49_v | 1      | STS_HUMAN   | STS      |
| MOL002397 | FZ7 | FU ZI | 1j96_v | 0.9559 | AK1C2_HUMAN | AKR1C2   |
| MOL002397 | FZ7 | FU ZI | 1e7e_v | 1      | ALBU_HUMAN  | ALB      |
| MOL002397 | FZ7 | FU ZI | 1x97_v | 0.9173 | ALDR_HUMAN  | AKR1B1   |
| MOL002397 | FZ7 | FU ZI | 1hak_v | 0.9438 | ANXA5_HUMAN | ANXA5    |
| MOL002397 | FZ7 | FU ZI | 116l_v | 0.9174 | APOA2_HUMAN | APOA2    |
| MOL002397 | FZ7 | FU ZI | 1reu_v | 1      | BMP2_HUMAN  | BMP2     |
| MOL002397 | FZ7 | FU ZI | 1okl_v | 0.9219 | CAH2_HUMAN  | CA2      |
| MOL002397 | FZ7 | FU ZI | 2brm_v | 0.9478 | CHK1_HUMAN  | CHEK1    |
| MOL002397 | FZ7 | FU ZI | 1lbk_v | 0.9917 | GSTP1_HUMAN | GSTP1    |
| MOL002397 | FZ7 | FU ZI | 1xdd_v | 0.9035 | ITAL_HUMAN  | ITGAL    |
| MOL002397 | FZ7 | FU ZI | 2fky_v | 0.9011 | KIF11_HUMAN | KIF11    |
| MOL002397 | FZ7 | FU ZI | 1pmv_v | 0.9834 | MK10_HUMAN  | MAPK10   |
| MOL002397 | FZ7 | FU ZI | 3bgq_v | 0.9007 | P11309      | PIM1     |
| MOL002397 | FZ7 | FU ZI | 1w8l_v | 0.917  | P62937      | PPIA     |
| MOL002397 | FZ7 | FU ZI | 1a28_v | 0.941  | PRGR_HUMAN  | PGR      |
| MOL002397 | FZ7 | FU ZI | 1p49_v | 1      | STS_HUMAN   | STS      |
| MOL002397 | FZ7 | FU ZI | 1no9_v | 0.9359 | THRB_HUMAN  | F2       |
| MOL002398 | FZ8 | FU ZI | 1md3_v | 0.9404 | GSTP1_HUMAN | GSTP1    |
| MOL002401 | FZ9 | FU ZI | 1j96_v | 0.9976 | AK1C2_HUMAN | AKR1C2   |
| MOL002401 | FZ9 | FU ZI | 1xf0_v | 0.9593 | AK1C3_HUMAN | AKR1C3   |
| MOL002401 | FZ9 | FU ZI | 1e7a_v | 0.975  | ALBU_HUMAN  | ALB      |
| MOL002401 | FZ9 | FU ZI | 2agt_v | 0.9572 | ALDR_HUMAN  | AKR1B1   |
| MOL002401 | FZ9 | FU ZI | 2pit_v | 0.9622 | ANDR_HUMAN  | AR       |
| MOL002401 | FZ9 | FU ZI | 1oj9_v | 0.9934 | AOFB_HUMAN  | MAOB     |
| MOL002401 | FZ9 | FU ZI | 1reu_v | 0.9861 | BMP2_HUMAN  | BMP2     |
| MOL002401 | FZ9 | FU ZI | 1if8_v | 0.9852 | CAH2_HUMAN  | CA2      |
| MOL002401 | FZ9 | FU ZI | 3dej_v | 0.9883 | CASP3_HUMAN | CASP3    |
| MOL002401 | FZ9 | FU ZI | 1shj_v | 0.9985 | CASP7_HUMAN | CASP7    |
| MOL002401 | FZ9 | FU ZI | 1rs0_v | 0.9436 | CFAB_HUMAN  | CFB      |
| MOL002401 | FZ9 | FU ZI | 2brg_v | 0.9535 | CHK1_HUMAN  | CHEK1    |
| MOL002401 | FZ9 | FU ZI | 1p0i_v | 0.9237 | CHLE_HUMAN  | BCHE     |
| MOL002401 | FZ9 | FU ZI | 1yb1_v | 0.985  | DHB11_HUMAN | HSD17B11 |
| MOL002401 | FZ9 | FU ZI | 1md3_v | 0.9477 | GSTP1_HUMAN | GSTP1    |
| MOL002401 | FZ9 | FU ZI | 2pg2_v | 0.9669 | KIF11_HUMAN | KIF11    |
| MOL002401 | FZ9 | FU ZI | 1pme_v | 0.9402 | MK01_HUMAN  | MAPK1    |
| MOL002401 | FZ9 | FU ZI | 1pmv_v | 0.969  | MK10_HUMAN  | MAPK10   |
| MOL002401 | FZ9 | FU ZI | 1eub_v | 0.9062 | MMP13_HUMAN | MMP13    |
| MOL002401 | FZ9 | FU ZI | 2pin_v | 0.9991 | P10828      | THRB     |
| MOL002401 | FZ9 | FU ZI | 3eqm_v | 0.9326 | P11511      | CYP19A1  |



|           |      |         |        |        |             |          |
|-----------|------|---------|--------|--------|-------------|----------|
| MOL002401 | FZ9  | FU ZI   | 3cjf_v | 0.9528 | P35968      | KDR      |
| MOL002401 | FZ9  | FU ZI   | 2p3g_v | 0.9569 | P49137      | 1APKAPK2 |
| MOL002401 | FZ9  | FU ZI   | 3exo_v | 0.914  | P56817      | BACE1    |
| MOL002401 | FZ9  | FU ZI   | 1w8l_v | 0.9859 | P62937      | PPIA     |
| MOL002401 | FZ9  | FU ZI   | 2o65_v | 0.9535 | PIM1_HUMAN  | PIM1     |
| MOL002401 | FZ9  | FU ZI   | 1zgy_v | 0.9882 | PPARG_HUMAN | PPARG    |
| MOL002401 | FZ9  | FU ZI   | 1w7h_v | 0.944  | Q16539      | MAPK14   |
| MOL002401 | FZ9  | FU ZI   | 1p49_v | 0.968  | STS_HUMAN   | STS      |
| MOL002401 | FZ9  | FU ZI   | 1f86_v | 0.9817 | TTHY_HUMAN  | TTR      |
| MOL002401 | FZ9  | FU ZI   | 1j78_v | 1      | VTDB_HUMAN  | GC       |
| MOL000211 | GC1  | GAN CAO | 1j96_v | 0.9843 | AK1C2_HUMAN | AKR1C2   |
| MOL000211 | GC1  | GAN CAO | 1e7e_v | 0.974  | ALBU_HUMAN  | ALB      |
| MOL000211 | GC1  | GAN CAO | 1l6l_v | 0.9012 | APOA2_HUMAN | APOA2    |
| MOL000211 | GC1  | GAN CAO | 1reu_v | 0.9742 | BMP2_HUMAN  | BMP2     |
| MOL000211 | GC1  | GAN CAO | 2nnv_v | 0.9358 | CAH2_HUMAN  | CA2      |
| MOL000211 | GC1  | GAN CAO | 2vwu_v | 0.9023 | EPHB4_HUMAN | EPHB4    |
| MOL000211 | GC1  | GAN CAO | 3cgf_v | 0.9476 | MK10_HUMAN  | MAPK10   |
| MOL000211 | GC1  | GAN CAO | 3bgp_v | 0.9836 | P11309      | PIM1     |
| MOL000211 | GC1  | GAN CAO | 3cjf_v | 0.9476 | P35968      | KDR      |
| MOL000211 | GC1  | GAN CAO | 2p3g_v | 0.9649 | P49137      | 1APKAPK2 |
| MOL000211 | GC1  | GAN CAO | 1w8l_v | 0.9489 | P62937      | PPIA     |
| MOL000211 | GC1  | GAN CAO | 1p49_v | 0.9788 | STS_HUMAN   | STS      |
| MOL000211 | GC1  | GAN CAO | 1j78_v | 0.9174 | VTDB_HUMAN  | GC       |
| MOL004328 | GC10 | GAN CAO | 2ama_v | 0.9529 | ANDR_HUMAN  | AR       |
| MOL004328 | GC10 | GAN CAO | 2ohp_v | 0.9645 | BACE1_HUMAN | BACE1    |
| MOL004328 | GC10 | GAN CAO | 2osf_v | 0.972  | CAH2_HUMAN  | CA2      |
| MOL004328 | GC10 | GAN CAO | 1p0i_v | 0.9622 | CHLE_HUMAN  | BCHE     |
| MOL004328 | GC10 | GAN CAO | 2itx_v | 0.9418 | EGFR_HUMAN  | EGFR     |
| MOL004328 | GC10 | GAN CAO | 1uki_v | 0.9024 | MK08_HUMAN  | MAPK8    |
| MOL004328 | GC10 | GAN CAO | 3cgf_v | 0.9435 | MK10_HUMAN  | MAPK10   |
| MOL004328 | GC10 | GAN CAO | 3cjf_v | 0.9436 | P35968      | KDR      |
| MOL004805 | GC11 | GAN CAO | 1j96_v | 0.9895 | AK1C2_HUMAN | AKR1C2   |
| MOL004805 | GC11 | GAN CAO | 1e7e_v | 0.9856 | ALBU_HUMAN  | ALB      |
| MOL004805 | GC11 | GAN CAO | 2pir_v | 0.9409 | ANDR_HUMAN  | AR       |
| MOL004805 | GC11 | GAN CAO | 1oj9_v | 0.9352 | AOFB_HUMAN  | MAOB     |
| MOL004805 | GC11 | GAN CAO | 1l6l_v | 0.9915 | APOA2_HUMAN | APOA2    |
| MOL004805 | GC11 | GAN CAO | 2ohp_v | 0.9028 | BACE1_HUMAN | BACE1    |
| MOL004805 | GC11 | GAN CAO | 1reu_v | 0.922  | BMP2_HUMAN  | BMP2     |
| MOL004805 | GC11 | GAN CAO | 1if4_v | 0.9693 | CAH2_HUMAN  | CA2      |
| MOL004805 | GC11 | GAN CAO | 3dej_v | 0.9903 | CASP3_HUMAN | CASP3    |
| MOL004805 | GC11 | GAN CAO | 1shj_v | 0.9815 | CASP7_HUMAN | CASP7    |
| MOL004805 | GC11 | GAN CAO | 1rs0_v | 0.9972 | CFAB_HUMAN  | CFB      |

|           |      |         |        |        |             |          |
|-----------|------|---------|--------|--------|-------------|----------|
| MOL004805 | GC11 | GAN CAO | 2vwu_v | 0.9462 | EPHB4_HUMAN | EPHB4    |
| MOL004805 | GC11 | GAN CAO | 1qku_v | 0.9687 | ESR1_HUMAN  | ESR1     |
| MOL004805 | GC11 | GAN CAO | 2fky_v | 0.9204 | KIF11_HUMAN | KIF11    |
| MOL004805 | GC11 | GAN CAO | 1pme_v | 0.9396 | MK01_HUMAN  | MAPK1    |
| MOL004805 | GC11 | GAN CAO | 1uki_v | 0.9563 | MK08_HUMAN  | MAPK8    |
| MOL004805 | GC11 | GAN CAO | 3cgf_v | 0.9812 | MK10_HUMAN  | MAPK10   |
| MOL004805 | GC11 | GAN CAO | 1eub_v | 0.9682 | MMP13_HUMAN | MMP13    |
| MOL004805 | GC11 | GAN CAO | 2pin_v | 0.9153 | P10828      | THRB     |
| MOL004805 | GC11 | GAN CAO | 2obj_v | 0.9959 | P11309      | PIM1     |
| MOL004805 | GC11 | GAN CAO | 3eqm_v | 0.9692 | P11511      | CYP19A1  |
| MOL004805 | GC11 | GAN CAO | 3cjf_v | 0.9812 | P35968      | KDR      |
| MOL004805 | GC11 | GAN CAO | 2jbp_v | 0.9825 | P49137      | 1APKAPK2 |
| MOL004805 | GC11 | GAN CAO | 1w8l_v | 0.9559 | P62937      | PPIA     |
| MOL004805 | GC11 | GAN CAO | 2a4z_v | 0.9597 | PK3CG_HUMAN | PIK3CG   |
| MOL004805 | GC11 | GAN CAO | 1zgy_v | 0.9491 | PPARG_HUMAN | PPARG    |
| MOL004805 | GC11 | GAN CAO | 2ovm_v | 0.9617 | PRGR_HUMAN  | PGR      |
| MOL004805 | GC11 | GAN CAO | 1wbo_v | 0.9992 | Q16539      | MAPK14   |
| MOL004805 | GC11 | GAN CAO | 1p49_v | 0.9752 | STS_HUMAN   | STS      |
| MOL004805 | GC11 | GAN CAO | 1no9_v | 0.9382 | THRB_HUMAN  | F2       |
| MOL004805 | GC11 | GAN CAO | 1dvz_v | 0.9656 | TTHY_HUMAN  | TTR      |
| MOL004806 | GC12 | GAN CAO | 1j96_v | 0.9966 | AK1C2_HUMAN | AKR1C2   |
| MOL004806 | GC12 | GAN CAO | 1e7e_v | 0.9475 | ALBU_HUMAN  | ALB      |
| MOL004806 | GC12 | GAN CAO | 1oj9_v | 0.9878 | AOFB_HUMAN  | MAOB     |
| MOL004806 | GC12 | GAN CAO | 1l6l_v | 0.9713 | APOA2_HUMAN | APOA2    |
| MOL004806 | GC12 | GAN CAO | 1ze8_v | 0.9742 | CAH2_HUMAN  | CA2      |
| MOL004806 | GC12 | GAN CAO | 3dej_v | 0.9449 | CASP3_HUMAN | CASP3    |
| MOL004806 | GC12 | GAN CAO | 1shj_v | 0.9708 | CASP7_HUMAN | CASP7    |
| MOL004806 | GC12 | GAN CAO | 2bkz_v | 0.9007 | CCNA2_HUMAN | CCNA2    |
| MOL004806 | GC12 | GAN CAO | 1rs0_v | 0.9986 | CFAB_HUMAN  | CFB      |
| MOL004806 | GC12 | GAN CAO | 2brb_v | 0.9906 | CHK1_HUMAN  | CHEK1    |
| MOL004806 | GC12 | GAN CAO | 1ere_v | 0.9175 | ESR1_HUMAN  | ESR1     |
| MOL004806 | GC12 | GAN CAO | 1ya8_v | 0.9504 | EST1_HUMAN  | CES1     |
| MOL004806 | GC12 | GAN CAO | 2j38_v | 0.9353 | FA10_HUMAN  | F10      |
| MOL004806 | GC12 | GAN CAO | 1f40_v | 0.9015 | FKB1A_HUMAN | FKBP1A   |
| MOL004806 | GC12 | GAN CAO | 2uyi_v | 0.9489 | KIF11_HUMAN | KIF11    |
| MOL004806 | GC12 | GAN CAO | 1pme_v | 0.9799 | MK01_HUMAN  | MAPK1    |
| MOL004806 | GC12 | GAN CAO | 1eub_v | 0.9767 | MMP13_HUMAN | MMP13    |
| MOL004806 | GC12 | GAN CAO | 1bm6_v | 0.9254 | MMP3_HUMAN  | MMP3     |
| MOL004806 | GC12 | GAN CAO | 3f5p_v | 0.9339 | P08069      | IGF1R    |
| MOL004806 | GC12 | GAN CAO | 2pin_v | 0.9667 | P10828      | THRB     |
| MOL004806 | GC12 | GAN CAO | 2obj_v | 0.9873 | P11309      | PIM1     |
| MOL004806 | GC12 | GAN CAO | 2p3g_v | 0.9858 | P49137      | 1APKAPK2 |

|           |      |         |        |        |             |          |
|-----------|------|---------|--------|--------|-------------|----------|
| MOL004806 | GC12 | GAN CAO | 2a4z_v | 0.9928 | PK3CG_HUMAN | PIK3CG   |
| MOL004806 | GC12 | GAN CAO | 2ovm_v | 0.9419 | PRGR_HUMAN  | PGR      |
| MOL004806 | GC12 | GAN CAO | 1w7h_v | 0.9275 | Q16539      | MAPK14   |
| MOL004806 | GC12 | GAN CAO | 1p49_v | 0.9733 | STS_HUMAN   | STS      |
| MOL004806 | GC12 | GAN CAO | 1no9_v | 0.9311 | THRB_HUMAN  | F2       |
| MOL004806 | GC12 | GAN CAO | 1dvz_v | 0.9841 | TTHY_HUMAN  | TTR      |
| MOL004808 | GC13 | GAN CAO | 1e7e_v | 0.9419 | ALBU_HUMAN  | ALB      |
| MOL004808 | GC13 | GAN CAO | 2pit_v | 0.9819 | ANDR_HUMAN  | AR       |
| MOL004808 | GC13 | GAN CAO | 1l6l_v | 0.9659 | APOA2_HUMAN | APOA2    |
| MOL004808 | GC13 | GAN CAO | 2ohp_v | 0.9279 | BACE1_HUMAN | BACE1    |
| MOL004808 | GC13 | GAN CAO | 1czm_v | 0.9691 | CAH1_HUMAN  | CA1      |
| MOL004808 | GC13 | GAN CAO | 1zfq_v | 0.9037 | CAH2_HUMAN  | CA2      |
| MOL004808 | GC13 | GAN CAO | 1shj_v | 0.9654 | CASP7_HUMAN | CASP7    |
| MOL004808 | GC13 | GAN CAO | 1rs0_v | 0.9804 | CFAB_HUMAN  | CFB      |
| MOL004808 | GC13 | GAN CAO | 1xlu_v | 0.9675 | CHLE_HUMAN  | BCHE     |
| MOL004808 | GC13 | GAN CAO | 2vwu_v | 0.9235 | EPHB4_HUMAN | EPHB4    |
| MOL004808 | GC13 | GAN CAO | 1qku_v | 0.9327 | ESR1_HUMAN  | ESR1     |
| MOL004808 | GC13 | GAN CAO | 1qkm_v | 0.9786 | ESR2_HUMAN  | ESR2     |
| MOL004808 | GC13 | GAN CAO | 1ya8_v | 0.9521 | EST1_HUMAN  | CES1     |
| MOL004808 | GC13 | GAN CAO | 2uyi_v | 0.9677 | KIF11_HUMAN | KIF11    |
| MOL004808 | GC13 | GAN CAO | 1pme_v | 0.9615 | MK01_HUMAN  | MAPK1    |
| MOL004808 | GC13 | GAN CAO | 1uki_v | 0.9624 | MK08_HUMAN  | MAPK8    |
| MOL004808 | GC13 | GAN CAO | 1pmv_v | 0.9772 | MK10_HUMAN  | MAPK10   |
| MOL004808 | GC13 | GAN CAO | 1bm6_v | 0.9733 | MMP3_HUMAN  | MMP3     |
| MOL004808 | GC13 | GAN CAO | 3eko_v | 0.9412 | P07900      | HSP90AA1 |
| MOL004808 | GC13 | GAN CAO | 1jvp_v | 0.955  | P24941      | CDK2     |
| MOL004808 | GC13 | GAN CAO | 3cjf_v | 0.9513 | P35968      | KDR      |
| MOL004808 | GC13 | GAN CAO | 2jbp_v | 0.9195 | P49137      | 4APKAPK2 |
| MOL004808 | GC13 | GAN CAO | 1yxx_v | 0.9836 | PIM1_HUMAN  | PIM1     |
| MOL004808 | GC13 | GAN CAO | 1v3q_v | 0.9294 | PNPH_HUMAN  | PNP      |
| MOL004808 | GC13 | GAN CAO | 1wbw_v | 0.9915 | Q16539      | MAPK14   |
| MOL004808 | GC13 | GAN CAO | 1q8m_v | 0.9839 | Q9NP99      | TREM1    |
| MOL004808 | GC13 | GAN CAO | 1p49_v | 0.9707 | STS_HUMAN   | STS      |
| MOL004808 | GC13 | GAN CAO | 1dvz_v | 0.9764 | TTHY_HUMAN  | TTR      |
| MOL004810 | GC14 | GAN CAO | 1j96_v | 0.9576 | AK1C2_HUMAN | AKR1C2   |
| MOL004810 | GC14 | GAN CAO | 1e7a_v | 0.9248 | ALBU_HUMAN  | ALB      |
| MOL004810 | GC14 | GAN CAO | 2pir_v | 0.948  | ANDR_HUMAN  | AR       |
| MOL004810 | GC14 | GAN CAO | 2v5z_v | 0.9374 | AOFB_HUMAN  | MAOB     |
| MOL004810 | GC14 | GAN CAO | 2ohp_v | 0.9825 | BACE1_HUMAN | BACE1    |
| MOL004810 | GC14 | GAN CAO | 1reu_v | 0.9076 | BMP2_HUMAN  | BMP2     |
| MOL004810 | GC14 | GAN CAO | 1czm_v | 0.9686 | CAH1_HUMAN  | CA1      |
| MOL004810 | GC14 | GAN CAO | 3dej_v | 0.9372 | CASP3_HUMAN | CASP3    |

|           |      |         |        |        |             |          |
|-----------|------|---------|--------|--------|-------------|----------|
| MOL004810 | GC14 | GAN CAO | 1rs0_v | 0.9686 | CFAB_HUMAN  | CFB      |
| MOL004810 | GC14 | GAN CAO | 2brg_v | 0.9489 | CHK1_HUMAN  | CHEK1    |
| MOL004810 | GC14 | GAN CAO | 1xlu_v | 0.9657 | CHLE_HUMAN  | BCHE     |
| MOL004810 | GC14 | GAN CAO | 2vwu_v | 0.9866 | EPHB4_HUMAN | EPHB4    |
| MOL004810 | GC14 | GAN CAO | 2i0j_v | 0.9918 | ESR1_HUMAN  | ESR1     |
| MOL004810 | GC14 | GAN CAO | 1x7j_v | 0.9686 | ESR2_HUMAN  | ESR2     |
| MOL004810 | GC14 | GAN CAO | 1ya8_v | 0.9679 | EST1_HUMAN  | CES1     |
| MOL004810 | GC14 | GAN CAO | 1lbk_v | 0.9156 | GSTP1_HUMAN | GSTP1    |
| MOL004810 | GC14 | GAN CAO | 2hck_v | 0.9166 | HCK_HUMAN   | HCK      |
| MOL004810 | GC14 | GAN CAO | 2pg2_v | 0.9841 | KIF11_HUMAN | KIF11    |
| MOL004810 | GC14 | GAN CAO | 1pme_v | 0.9562 | MK01_HUMAN  | MAPK1    |
| MOL004810 | GC14 | GAN CAO | 1uki_v | 0.9902 | MK08_HUMAN  | MAPK8    |
| MOL004810 | GC14 | GAN CAO | 1pmv_v | 0.9889 | MK10_HUMAN  | MAPK10   |
| MOL004810 | GC14 | GAN CAO | 1eub_v | 0.9905 | MMP13_HUMAN | MMP13    |
| MOL004810 | GC14 | GAN CAO | 1bm6_v | 0.9216 | MMP3_HUMAN  | MMP3     |
| MOL004810 | GC14 | GAN CAO | 2pin_v | 0.9161 | P10828      | THRB     |
| MOL004810 | GC14 | GAN CAO | 3eqm_v | 0.9246 | P11511      | CYP19A1  |
| MOL004810 | GC14 | GAN CAO | 3gam_v | 0.9203 | P16083      | NQO2     |
| MOL004810 | GC14 | GAN CAO | 3cjf_v | 0.9468 | P35968      | KDR      |
| MOL004810 | GC14 | GAN CAO | 2p3g_v | 0.9343 | P49137      | 1APKAPK2 |
| MOL004810 | GC14 | GAN CAO | 1w8m_v | 0.9675 | P62937      | PPIA     |
| MOL004810 | GC14 | GAN CAO | 1yxx_v | 0.9891 | PIM1_HUMAN  | PIM1     |
| MOL004810 | GC14 | GAN CAO | 1v3q_v | 0.9456 | PNPH_HUMAN  | PNP      |
| MOL004810 | GC14 | GAN CAO | 2ovm_v | 0.9746 | PRGR_HUMAN  | PGR      |
| MOL004810 | GC14 | GAN CAO | 1w7h_v | 0.9748 | Q16539      | MAPK14   |
| MOL004810 | GC14 | GAN CAO | 1q8m_v | 0.9857 | Q9NP99      | TREM1    |
| MOL004810 | GC14 | GAN CAO | 1no9_v | 0.9131 | THRB_HUMAN  | F2       |
| MOL004810 | GC14 | GAN CAO | 1dvz_v | 0.9594 | TTHY_HUMAN  | TTR      |
| MOL004811 | GC15 | GAN CAO | 1e7e_v | 0.9604 | ALBU_HUMAN  | ALB      |
| MOL004811 | GC15 | GAN CAO | 2pir_v | 0.9007 | ANDR_HUMAN  | AR       |
| MOL004811 | GC15 | GAN CAO | 1oj9_v | 0.9967 | AOFB_HUMAN  | MAOB     |
| MOL004811 | GC15 | GAN CAO | 1l6l_v | 0.9436 | APOA2_HUMAN | APOA2    |
| MOL004811 | GC15 | GAN CAO | 1okl_v | 0.9602 | CAH2_HUMAN  | CA2      |
| MOL004811 | GC15 | GAN CAO | 1shj_v | 0.9537 | CASP7_HUMAN | CASP7    |
| MOL004811 | GC15 | GAN CAO | 1fh0_v | 0.9578 | CATL2_HUMAN | CTSV     |
| MOL004811 | GC15 | GAN CAO | 1x7r_v | 0.9643 | ESR1_HUMAN  | ESR1     |
| MOL004811 | GC15 | GAN CAO | 1qkm_v | 0.9831 | ESR2_HUMAN  | ESR2     |
| MOL004811 | GC15 | GAN CAO | 1ya8_v | 0.9967 | EST1_HUMAN  | CES1     |
| MOL004811 | GC15 | GAN CAO | 2uyi_v | 0.9738 | KIF11_HUMAN | KIF11    |
| MOL004811 | GC15 | GAN CAO | 1pme_v | 0.9687 | MK01_HUMAN  | MAPK1    |
| MOL004811 | GC15 | GAN CAO | 1pmv_v | 0.9582 | MK10_HUMAN  | MAPK10   |
| MOL004811 | GC15 | GAN CAO | 1bm6_v | 0.9323 | MMP3_HUMAN  | MMP3     |

|           |      |         |        |        |             |          |
|-----------|------|---------|--------|--------|-------------|----------|
| MOL004811 | GC15 | GAN CAO | 3cjf_v | 0.9085 | P35968      | KDR      |
| MOL004811 | GC15 | GAN CAO | 2p3g_v | 0.968  | P49137      | 1APKAPK2 |
| MOL004811 | GC15 | GAN CAO | 2o65_v | 0.9664 | PIM1_HUMAN  | PIM1     |
| MOL004811 | GC15 | GAN CAO | 2a4z_v | 0.9402 | PK3CG_HUMAN | PIK3CG   |
| MOL004811 | GC15 | GAN CAO | 1w7h_v | 0.9731 | Q16539      | MAPK14   |
| MOL004811 | GC15 | GAN CAO | 1q8m_v | 0.9866 | Q9NP99      | TREM1    |
| MOL004811 | GC15 | GAN CAO | 1p49_v | 0.9505 | STS_HUMAN   | STS      |
| MOL004811 | GC15 | GAN CAO | 1no9_v | 0.9185 | THRB_HUMAN  | F2       |
| MOL004811 | GC15 | GAN CAO | 2roy_v | 0.9371 | TTHY_HUMAN  | TTR      |
| MOL004811 | GC15 | GAN CAO | 1j78_v | 0.9064 | VTDB_HUMAN  | GC       |
| MOL004814 | GC16 | GAN CAO | 1e7e_v | 0.906  | ALBU_HUMAN  | ALB      |
| MOL004814 | GC16 | GAN CAO | 1xj7_v | 0.941  | ANDR_HUMAN  | AR       |
| MOL004814 | GC16 | GAN CAO | 1l6l_v | 0.9683 | APOA2_HUMAN | APOA2    |
| MOL004814 | GC16 | GAN CAO | 1kwq_v | 0.9653 | CAH2_HUMAN  | CA2      |
| MOL004814 | GC16 | GAN CAO | 1rs0_v | 0.9577 | CFAB_HUMAN  | CFB      |
| MOL004814 | GC16 | GAN CAO | 2ocf_v | 0.9981 | ESR1_HUMAN  | ESR1     |
| MOL004814 | GC16 | GAN CAO | 2i0g_v | 0.9889 | ESR2_HUMAN  | ESR2     |
| MOL004814 | GC16 | GAN CAO | 1ya8_v | 0.9857 | EST1_HUMAN  | CES1     |
| MOL004814 | GC16 | GAN CAO | 1uki_v | 0.9447 | MK08_HUMAN  | MAPK8    |
| MOL004814 | GC16 | GAN CAO | 1pmv_v | 0.962  | MK10_HUMAN  | MAPK10   |
| MOL004814 | GC16 | GAN CAO | 1bm6_v | 0.9329 | MMP3_HUMAN  | MMP3     |
| MOL004814 | GC16 | GAN CAO | 3eqm_v | 0.9068 | P11511      | CYP19A1  |
| MOL004814 | GC16 | GAN CAO | 1xlz_v | 0.9692 | PDE4B_HUMAN | PDE4B    |
| MOL004814 | GC16 | GAN CAO | 2pe0_v | 0.9294 | PDPK1_HUMAN | PDPK1    |
| MOL004814 | GC16 | GAN CAO | 1yxx_v | 0.9819 | PIM1_HUMAN  | PIM1     |
| MOL004814 | GC16 | GAN CAO | 1p49_v | 0.9725 | STS_HUMAN   | STS      |
| MOL004814 | GC16 | GAN CAO | 1no9_v | 0.9723 | THRB_HUMAN  | F2       |
| MOL004815 | GC17 | GAN CAO | 1shj_v | 0.9816 | CASP7_HUMAN | CASP7    |
| MOL004815 | GC17 | GAN CAO | 1p0i_v | 0.9558 | CHLE_HUMAN  | BCHE     |
| MOL004815 | GC17 | GAN CAO | 2i0j_v | 0.9734 | ESR1_HUMAN  | ESR1     |
| MOL004815 | GC17 | GAN CAO | 1ya8_v | 0.9651 | EST1_HUMAN  | CES1     |
| MOL004815 | GC17 | GAN CAO | 1ogs_v | 0.9752 | GLCM_HUMAN  | GBA      |
| MOL004815 | GC17 | GAN CAO | 1l6k_v | 0.9438 | GSTP1_HUMAN | GSTP1    |
| MOL004815 | GC17 | GAN CAO | 2hck_v | 0.9272 | HCK_HUMAN   | HCK      |
| MOL004815 | GC17 | GAN CAO | 3dcw_v | 0.9002 | P00918      | CA2      |
| MOL004815 | GC17 | GAN CAO | 1yxx_v | 0.9678 | PIM1_HUMAN  | PIM1     |
| MOL004815 | GC17 | GAN CAO | 2a4z_v | 0.9552 | PK3CG_HUMAN | PIK3CG   |
| MOL004815 | GC17 | GAN CAO | 2qd9_v | 0.9623 | Q16539      | MAPK14   |
| MOL004815 | GC17 | GAN CAO | 2roy_v | 0.9787 | TTHY_HUMAN  | TTR      |
| MOL004820 | GC18 | GAN CAO | 1j96_v | 0.9304 | AK1C2_HUMAN | AKR1C2   |
| MOL004820 | GC18 | GAN CAO | 1xf0_v | 0.903  | AK1C3_HUMAN | AKR1C3   |
| MOL004820 | GC18 | GAN CAO | 1e7a_v | 0.9426 | ALBU_HUMAN  | ALB      |

|           |      |         |        |        |             |        |
|-----------|------|---------|--------|--------|-------------|--------|
| MOL004820 | GC18 | GAN CAO | 1xow_v | 0.9699 | ANDR_HUMAN  | AR     |
| MOL004820 | GC18 | GAN CAO | 1reu_v | 0.9198 | BMP2_HUMAN  | BMP2   |
| MOL004820 | GC18 | GAN CAO | 2qo8_v | 0.9176 | CAH2_HUMAN  | CA2    |
| MOL004820 | GC18 | GAN CAO | 1gfw_v | 0.9264 | CASP3_HUMAN | CASP3  |
| MOL004820 | GC18 | GAN CAO | 2uzd_v | 0.9196 | CCNA2_HUMAN | CCNA2  |
| MOL004820 | GC18 | GAN CAO | 2ocf_v | 0.9359 | ESR1_HUMAN  | ESR1   |
| MOL004820 | GC18 | GAN CAO | 1qkm_v | 0.9815 | ESR2_HUMAN  | ESR2   |
| MOL004820 | GC18 | GAN CAO | 1ya8_v | 0.9385 | EST1_HUMAN  | CES1   |
| MOL004820 | GC18 | GAN CAO | 1pme_v | 0.9201 | MK01_HUMAN  | MAPK1  |
| MOL004820 | GC18 | GAN CAO | 1pmv_v | 0.9942 | MK10_HUMAN  | MAPK10 |
| MOL004820 | GC18 | GAN CAO | 1bm6_v | 0.9494 | MMP3_HUMAN  | MMP3   |
| MOL004820 | GC18 | GAN CAO | 1yxx_v | 0.9852 | PIM1_HUMAN  | PIM1   |
| MOL004820 | GC18 | GAN CAO | 1wbw_v | 0.9781 | Q16539      | MAPK14 |
| MOL004820 | GC18 | GAN CAO | 1dvz_v | 0.9767 | TTHY_HUMAN  | TTR    |
| MOL004824 | GC19 | GAN CAO | 2pir_v | 0.9433 | ANDR_HUMAN  | AR     |
| MOL004824 | GC19 | GAN CAO | 1if4_v | 0.9706 | CAH2_HUMAN  | CA2    |
| MOL004824 | GC19 | GAN CAO | 1rs0_v | 0.9268 | CFAB_HUMAN  | CFB    |
| MOL004824 | GC19 | GAN CAO | 1p0i_v | 0.9595 | CHLE_HUMAN  | BCHE   |
| MOL004824 | GC19 | GAN CAO | 1klt_v | 0.9101 | CMA1_HUMAN  | CMA1   |
| MOL004824 | GC19 | GAN CAO | 2i0j_v | 0.9324 | ESR1_HUMAN  | ESR1   |
| MOL004824 | GC19 | GAN CAO | 1qkm_v | 0.942  | ESR2_HUMAN  | ESR2   |
| MOL004824 | GC19 | GAN CAO | 1ya8_v | 0.9442 | EST1_HUMAN  | CES1   |
| MOL004824 | GC19 | GAN CAO | 1d7i_v | 0.9231 | FKB1A_HUMAN | FKBP1A |
| MOL004824 | GC19 | GAN CAO | 1ogs_v | 0.9637 | GLCM_HUMAN  | GBA    |
| MOL004824 | GC19 | GAN CAO | 1uki_v | 0.9907 | MK08_HUMAN  | MAPK8  |
| MOL004824 | GC19 | GAN CAO | 1pmv_v | 0.9962 | MK10_HUMAN  | MAPK10 |
| MOL004824 | GC19 | GAN CAO | 1bm6_v | 0.9597 | MMP3_HUMAN  | MMP3   |
| MOL004824 | GC19 | GAN CAO | 1w8l_v | 0.9438 | P62937      | PPIA   |
| MOL004824 | GC19 | GAN CAO | 1xn0_v | 0.9153 | PDE4B_HUMAN | PDE4B  |
| MOL004824 | GC19 | GAN CAO | 1yxx_v | 0.9864 | PIM1_HUMAN  | PIM1   |
| MOL004824 | GC19 | GAN CAO | 1wbw_v | 0.9931 | Q16539      | MAPK14 |
| MOL004824 | GC19 | GAN CAO | 1q8m_v | 0.9562 | Q9NP99      | TREM1  |
| MOL002311 | GC2  | GAN CAO | 1e7e_v | 0.9091 | ALBU_HUMAN  | ALB    |
| MOL002311 | GC2  | GAN CAO | 1xj7_v | 0.9248 | ANDR_HUMAN  | AR     |
| MOL002311 | GC2  | GAN CAO | 1oj9_v | 0.9059 | AOFB_HUMAN  | MAOB   |
| MOL002311 | GC2  | GAN CAO | 1l6l_v | 0.9138 | APOA2_HUMAN | APOA2  |
| MOL002311 | GC2  | GAN CAO | 2ohp_v | 0.9174 | BACE1_HUMAN | BACE1  |
| MOL002311 | GC2  | GAN CAO | 1reu_v | 0.9902 | BMP2_HUMAN  | BMP2   |
| MOL002311 | GC2  | GAN CAO | 2nnv_v | 0.9864 | CAH2_HUMAN  | CA2    |
| MOL002311 | GC2  | GAN CAO | 1shj_v | 0.9502 | CASP7_HUMAN | CASP7  |
| MOL002311 | GC2  | GAN CAO | 2uzd_v | 0.9201 | CCNA2_HUMAN | CCNA2  |
| MOL002311 | GC2  | GAN CAO | 1unh_v | 0.9324 | CD5R1_HUMAN | CDK5R1 |

|           |      |         |        |        |             |         |
|-----------|------|---------|--------|--------|-------------|---------|
| MOL002311 | GC2  | GAN CAO | 1rs0_v | 0.9732 | CFAB_HUMAN  | CFB     |
| MOL002311 | GC2  | GAN CAO | 1p0i_v | 0.9585 | CHLE_HUMAN  | BCHE    |
| MOL002311 | GC2  | GAN CAO | 3czt_v | 0.9146 | DHI1_HUMAN  | HSD11B1 |
| MOL002311 | GC2  | GAN CAO | 2ocf_v | 0.9902 | ESR1_HUMAN  | ESR1    |
| MOL002311 | GC2  | GAN CAO | 2jj3_v | 0.963  | ESR2_HUMAN  | ESR2    |
| MOL002311 | GC2  | GAN CAO | 1ya8_v | 0.9095 | EST1_HUMAN  | CES1    |
| MOL002311 | GC2  | GAN CAO | 1pme_v | 0.998  | MK01_HUMAN  | MAPK1   |
| MOL002311 | GC2  | GAN CAO | 1uki_v | 0.9225 | MK08_HUMAN  | MAPK8   |
| MOL002311 | GC2  | GAN CAO | 3cgf_v | 0.959  | MK10_HUMAN  | MAPK10  |
| MOL002311 | GC2  | GAN CAO | 3bgp_v | 0.9868 | P11309      | PIM1    |
| MOL002311 | GC2  | GAN CAO | 1jvp_v | 0.946  | P24941      | CDK2    |
| MOL002311 | GC2  | GAN CAO | 3cjf_v | 0.9589 | P35968      | KDR     |
| MOL002311 | GC2  | GAN CAO | 1v3q_v | 0.9145 | PNPH_HUMAN  | PNP     |
| MOL002311 | GC2  | GAN CAO | 1fm6_v | 0.9571 | PPARG_HUMAN | PPARG   |
| MOL002311 | GC2  | GAN CAO | 1wbo_v | 0.9968 | Q16539      | MAPK14  |
| MOL002311 | GC2  | GAN CAO | 1p49_v | 0.9654 | STS_HUMAN   | STS     |
| MOL002311 | GC2  | GAN CAO | 1dvz_v | 0.9225 | TTHY_HUMAN  | TTR     |
| MOL002311 | GC2  | GAN CAO | 1j78_v | 0.9007 | VTDB_HUMAN  | GC      |
| MOL004827 | GC20 | GAN CAO | 1j96_v | 0.9598 | AK1C2_HUMAN | AKR1C2  |
| MOL004827 | GC20 | GAN CAO | 2pir_v | 0.9001 | ANDR_HUMAN  | AR      |
| MOL004827 | GC20 | GAN CAO | 1reu_v | 0.9192 | BMP2_HUMAN  | BMP2    |
| MOL004827 | GC20 | GAN CAO | 2osf_v | 0.9724 | CAH2_HUMAN  | CA2     |
| MOL004827 | GC20 | GAN CAO | 1rs0_v | 0.9336 | CFAB_HUMAN  | CFB     |
| MOL004827 | GC20 | GAN CAO | 1p0i_v | 0.9597 | CHLE_HUMAN  | BCHE    |
| MOL004827 | GC20 | GAN CAO | 2i0j_v | 0.9385 | ESR1_HUMAN  | ESR1    |
| MOL004827 | GC20 | GAN CAO | 1qkm_v | 0.9117 | ESR2_HUMAN  | ESR2    |
| MOL004827 | GC20 | GAN CAO | 1ya8_v | 0.9164 | EST1_HUMAN  | CES1    |
| MOL004827 | GC20 | GAN CAO | 1ogs_v | 0.9252 | GLCM_HUMAN  | GBA     |
| MOL004827 | GC20 | GAN CAO | 2o65_v | 0.9506 | PIM1_HUMAN  | PIM1    |
| MOL004827 | GC20 | GAN CAO | 1w7h_v | 0.9426 | Q16539      | MAPK14  |
| MOL004827 | GC20 | GAN CAO | 1z68_v | 0.9373 | SEPR_HUMAN  | FAP     |
| MOL004827 | GC20 | GAN CAO | 1no9_v | 0.96   | THRB_HUMAN  | F2      |
| MOL004828 | GC21 | GAN CAO | 1j96_v | 0.9857 | AK1C2_HUMAN | AKR1C2  |
| MOL004828 | GC21 | GAN CAO | 1e7e_v | 0.9058 | ALBU_HUMAN  | ALB     |
| MOL004828 | GC21 | GAN CAO | 2pit_v | 0.9824 | ANDR_HUMAN  | AR      |
| MOL004828 | GC21 | GAN CAO | 1l6l_v | 0.9402 | APOA2_HUMAN | APOA2   |
| MOL004828 | GC21 | GAN CAO | 1reu_v | 0.9678 | BMP2_HUMAN  | BMP2    |
| MOL004828 | GC21 | GAN CAO | 2osf_v | 0.97   | CAH2_HUMAN  | CA2     |
| MOL004828 | GC21 | GAN CAO | 3dej_v | 0.9617 | CASP3_HUMAN | CASP3   |
| MOL004828 | GC21 | GAN CAO | 1shj_v | 0.9402 | CASP7_HUMAN | CASP7   |
| MOL004828 | GC21 | GAN CAO | 1h1p_v | 0.9012 | CCNA2_HUMAN | CCNA2   |
| MOL004828 | GC21 | GAN CAO | 1rs0_v | 0.951  | CFAB_HUMAN  | CFB     |

|           |      |         |        |        |             |          |
|-----------|------|---------|--------|--------|-------------|----------|
| MOL004828 | GC21 | GAN CAO | 2brb_v | 0.9997 | CHK1_HUMAN  | CHEK1    |
| MOL004828 | GC21 | GAN CAO | 1xlu_v | 0.9722 | CHLE_HUMAN  | BCHE     |
| MOL004828 | GC21 | GAN CAO | 2itx_v | 0.9497 | EGFR_HUMAN  | EGFR     |
| MOL004828 | GC21 | GAN CAO | 2vwu_v | 0.9627 | EPHB4_HUMAN | EPHB4    |
| MOL004828 | GC21 | GAN CAO | 2ocf_v | 0.9494 | ESR1_HUMAN  | ESR1     |
| MOL004828 | GC21 | GAN CAO | 1ya8_v | 0.9169 | EST1_HUMAN  | CES1     |
| MOL004828 | GC21 | GAN CAO | 1lbk_v | 0.9711 | GSTP1_HUMAN | GSTP1    |
| MOL004828 | GC21 | GAN CAO | 2hck_v | 0.9856 | HCK_HUMAN   | HCK      |
| MOL004828 | GC21 | GAN CAO | 2pg2_v | 0.9837 | KIF11_HUMAN | KIF11    |
| MOL004828 | GC21 | GAN CAO | 3cgf_v | 0.9459 | MK10_HUMAN  | MAPK10   |
| MOL004828 | GC21 | GAN CAO | 1eub_v | 0.9913 | MMP13_HUMAN | MMP13    |
| MOL004828 | GC21 | GAN CAO | 1bm6_v | 0.9264 | MMP3_HUMAN  | MMP3     |
| MOL004828 | GC21 | GAN CAO | 1kbo_v | 0.9183 | NQO1_HUMAN  | NQO1     |
| MOL004828 | GC21 | GAN CAO | 2pin_v | 0.924  | P10828      | THRB     |
| MOL004828 | GC21 | GAN CAO | 3fzh_v | 0.9487 | P11142      | HSPA8    |
| MOL004828 | GC21 | GAN CAO | 2obj_v | 0.9587 | P11309      | PIM1     |
| MOL004828 | GC21 | GAN CAO | 3eqm_v | 0.9501 | P11511      | CYP19A1  |
| MOL004828 | GC21 | GAN CAO | 3cjf_v | 0.946  | P35968      | KDR      |
| MOL004828 | GC21 | GAN CAO | 1p49_v | 0.9509 | STS_HUMAN   | STS      |
| MOL004828 | GC21 | GAN CAO | 1dvz_v | 0.993  | TTHY_HUMAN  | TTR      |
| MOL004829 | GC22 | GAN CAO | 1j96_v | 0.9912 | AK1C2_HUMAN | AKR1C2   |
| MOL004829 | GC22 | GAN CAO | 1e7e_v | 0.9169 | ALBU_HUMAN  | ALB      |
| MOL004829 | GC22 | GAN CAO | 2pit_v | 0.9504 | ANDR_HUMAN  | AR       |
| MOL004829 | GC22 | GAN CAO | 1l6l_v | 0.9474 | APOA2_HUMAN | APOA2    |
| MOL004829 | GC22 | GAN CAO | 1reu_v | 0.9371 | BMP2_HUMAN  | BMP2     |
| MOL004829 | GC22 | GAN CAO | 1if4_v | 0.9619 | CAH2_HUMAN  | CA2      |
| MOL004829 | GC22 | GAN CAO | 1shj_v | 0.9663 | CASP7_HUMAN | CASP7    |
| MOL004829 | GC22 | GAN CAO | 1rs0_v | 0.9577 | CFAB_HUMAN  | CFB      |
| MOL004829 | GC22 | GAN CAO | 2brb_v | 0.9983 | CHK1_HUMAN  | CHEK1    |
| MOL004829 | GC22 | GAN CAO | 1p0i_v | 0.9465 | CHLE_HUMAN  | BCHE     |
| MOL004829 | GC22 | GAN CAO | 1yb1_v | 0.9057 | DHB11_HUMAN | HSD17B11 |
| MOL004829 | GC22 | GAN CAO | 2itx_v | 0.916  | EGFR_HUMAN  | EGFR     |
| MOL004829 | GC22 | GAN CAO | 2vwu_v | 0.9101 | EPHB4_HUMAN | EPHB4    |
| MOL004829 | GC22 | GAN CAO | 1qku_v | 0.949  | ESR1_HUMAN  | ESR1     |
| MOL004829 | GC22 | GAN CAO | 1f40_v | 0.9513 | FKB1A_HUMAN | FKBP1A   |
| MOL004829 | GC22 | GAN CAO | 1lbk_v | 0.9494 | GSTP1_HUMAN | GSTP1    |
| MOL004829 | GC22 | GAN CAO | 2hck_v | 0.9903 | HCK_HUMAN   | HCK      |
| MOL004829 | GC22 | GAN CAO | 2pg2_v | 0.9511 | KIF11_HUMAN | KIF11    |
| MOL004829 | GC22 | GAN CAO | 1pme_v | 0.9073 | MK01_HUMAN  | MAPK1    |
| MOL004829 | GC22 | GAN CAO | 1uki_v | 0.9097 | MK08_HUMAN  | MAPK8    |
| MOL004829 | GC22 | GAN CAO | 1pmv_v | 0.9303 | MK10_HUMAN  | MAPK10   |
| MOL004829 | GC22 | GAN CAO | 2obj_v | 0.9541 | P11309      | PIM1     |



|           |      |         |        |        |             |          |
|-----------|------|---------|--------|--------|-------------|----------|
| MOL004829 | GC22 | GAN CAO | 3exo_v | 0.9481 | P56817      | BACE1    |
| MOL004829 | GC22 | GAN CAO | 1w8l_v | 0.9525 | P62937      | PPIA     |
| MOL004829 | GC22 | GAN CAO | 1wbo_v | 0.9792 | Q16539      | MAPK14   |
| MOL004829 | GC22 | GAN CAO | 1p49_v | 0.9573 | STS_HUMAN   | STS      |
| MOL004829 | GC22 | GAN CAO | 1dvz_v | 0.9819 | TTHY_HUMAN  | TTR      |
| MOL004833 | GC23 | GAN CAO | 1e7e_v | 0.9567 | ALBU_HUMAN  | ALB      |
| MOL004833 | GC23 | GAN CAO | 1oj9_v | 0.9626 | AOFB_HUMAN  | MAOB     |
| MOL004833 | GC23 | GAN CAO | 2ohp_v | 0.9918 | BACE1_HUMAN | BACE1    |
| MOL004833 | GC23 | GAN CAO | 1if4_v | 0.9683 | CAH2_HUMAN  | CA2      |
| MOL004833 | GC23 | GAN CAO | 2i0j_v | 0.9977 | ESR1_HUMAN  | ESR1     |
| MOL004833 | GC23 | GAN CAO | 1qkm_v | 0.9652 | ESR2_HUMAN  | ESR2     |
| MOL004833 | GC23 | GAN CAO | 1ya8_v | 0.9244 | EST1_HUMAN  | CES1     |
| MOL004833 | GC23 | GAN CAO | 1w8l_v | 0.9039 | P62937      | PPIA     |
| MOL004833 | GC23 | GAN CAO | 1yxx_v | 0.9744 | PIM1_HUMAN  | PIM1     |
| MOL004833 | GC23 | GAN CAO | 2a4z_v | 0.9657 | PK3CG_HUMAN | PIK3CG   |
| MOL004833 | GC23 | GAN CAO | 1w7h_v | 0.9818 | Q16539      | MAPK14   |
| MOL004833 | GC23 | GAN CAO | 1q8m_v | 0.9654 | Q9NP99      | TREM1    |
| MOL004833 | GC23 | GAN CAO | 1p49_v | 0.9568 | STS_HUMAN   | STS      |
| MOL004835 | GC24 | GAN CAO | 1unh_v | 0.918  | CD5R1_HUMAN | CDK5R1   |
| MOL004835 | GC24 | GAN CAO | 2i0j_v | 0.9192 | ESR1_HUMAN  | ESR1     |
| MOL004835 | GC24 | GAN CAO | 1x7j_v | 0.9318 | ESR2_HUMAN  | ESR2     |
| MOL004835 | GC24 | GAN CAO | 1ya8_v | 0.9512 | EST1_HUMAN  | CES1     |
| MOL004835 | GC24 | GAN CAO | 1q8m_v | 0.9864 | Q9NP99      | TREM1    |
| MOL004838 | GC25 | GAN CAO | 1e7e_v | 0.9538 | ALBU_HUMAN  | ALB      |
| MOL004838 | GC25 | GAN CAO | 116l_v | 0.9643 | APOA2_HUMAN | APOA2    |
| MOL004838 | GC25 | GAN CAO | 2ohp_v | 0.9835 | BACE1_HUMAN | BACE1    |
| MOL004838 | GC25 | GAN CAO | 1reu_v | 0.908  | BMP2_HUMAN  | BMP2     |
| MOL004838 | GC25 | GAN CAO | 1if4_v | 0.951  | CAH2_HUMAN  | CA2      |
| MOL004838 | GC25 | GAN CAO | 1gfw_v | 0.941  | CASP3_HUMAN | CASP3    |
| MOL004838 | GC25 | GAN CAO | 2brg_v | 0.9771 | CHK1_HUMAN  | CHEK1    |
| MOL004838 | GC25 | GAN CAO | 2i0j_v | 0.9879 | ESR1_HUMAN  | ESR1     |
| MOL004838 | GC25 | GAN CAO | 1ya8_v | 0.9444 | EST1_HUMAN  | CES1     |
| MOL004838 | GC25 | GAN CAO | 1pme_v | 0.9919 | MK01_HUMAN  | MAPK1    |
| MOL004838 | GC25 | GAN CAO | 1eub_v | 0.9701 | MMP13_HUMAN | MMP13    |
| MOL004838 | GC25 | GAN CAO | 2p3g_v | 0.9587 | P49137      | MAPKAPK2 |
| MOL004838 | GC25 | GAN CAO | 2o65_v | 0.9837 | PIM1_HUMAN  | PIM1     |
| MOL004838 | GC25 | GAN CAO | 2ovm_v | 0.9156 | PRGR_HUMAN  | PGR      |
| MOL004838 | GC25 | GAN CAO | 1p49_v | 0.9621 | STS_HUMAN   | STS      |
| MOL004838 | GC25 | GAN CAO | 1j78_v | 0.9043 | VTDB_HUMAN  | GC       |
| MOL004841 | GC26 | GAN CAO | 2qo8_v | 0.9445 | CAH2_HUMAN  | CA2      |
| MOL004841 | GC26 | GAN CAO | 1lyw_v | 0.964  | CATD_HUMAN  | CTSD     |
| MOL004841 | GC26 | GAN CAO | 1qku_v | 0.975  | ESR1_HUMAN  | ESR1     |

|           |      |         |        |        |             |          |
|-----------|------|---------|--------|--------|-------------|----------|
| MOL004841 | GC26 | GAN CAO | 2jj3_v | 0.932  | ESR2_HUMAN  | ESR2     |
| MOL004841 | GC26 | GAN CAO | 1ya8_v | 0.9246 | EST1_HUMAN  | CES1     |
| MOL004841 | GC26 | GAN CAO | 1yxx_v | 0.9378 | PIM1_HUMAN  | PIM1     |
| MOL004841 | GC26 | GAN CAO | 1q8m_v | 0.9677 | Q9NP99      | TREM1    |
| MOL004841 | GC26 | GAN CAO | 1z68_v | 0.9222 | SEPR_HUMAN  | FAP      |
| MOL004848 | GC27 | GAN CAO | 1j96_v | 0.9991 | AK1C2_HUMAN | AKR1C2   |
| MOL004848 | GC27 | GAN CAO | 1xf0_v | 0.9796 | AK1C3_HUMAN | AKR1C3   |
| MOL004848 | GC27 | GAN CAO | 2agt_v | 0.959  | ALDR_HUMAN  | AKR1B1   |
| MOL004848 | GC27 | GAN CAO | 2pir_v | 0.9642 | ANDR_HUMAN  | AR       |
| MOL004848 | GC27 | GAN CAO | 3dej_v | 0.9723 | CASP3_HUMAN | CASP3    |
| MOL004848 | GC27 | GAN CAO | 1xlu_v | 0.9654 | CHLE_HUMAN  | BCHE     |
| MOL004848 | GC27 | GAN CAO | 2vwu_v | 0.9699 | EPHB4_HUMAN | EPHB4    |
| MOL004848 | GC27 | GAN CAO | 1qku_v | 0.9614 | ESR1_HUMAN  | ESR1     |
| MOL004848 | GC27 | GAN CAO | 1ya8_v | 0.9292 | EST1_HUMAN  | CES1     |
| MOL004848 | GC27 | GAN CAO | 1ogs_v | 0.9946 | GLCM_HUMAN  | GBA      |
| MOL004848 | GC27 | GAN CAO | 1lbk_v | 0.9404 | GSTP1_HUMAN | GSTP1    |
| MOL004848 | GC27 | GAN CAO | 2hck_v | 0.9084 | HCK_HUMAN   | HCK      |
| MOL004848 | GC27 | GAN CAO | 3dcw_v | 0.9833 | P00918      | CA2      |
| MOL004848 | GC27 | GAN CAO | 2obj_v | 0.9554 | P11309      | PIM1     |
| MOL004848 | GC27 | GAN CAO | 3eqm_v | 0.9719 | P11511      | CYP19A1  |
| MOL004848 | GC27 | GAN CAO | 2ovm_v | 0.9228 | PRGR_HUMAN  | PGR      |
| MOL004848 | GC27 | GAN CAO | 1wbo_v | 0.9948 | Q16539      | MAPK14   |
| MOL004848 | GC27 | GAN CAO | 1q8m_v | 0.9496 | Q9NP99      | TREM1    |
| MOL004849 | GC28 | GAN CAO | 1j96_v | 0.9977 | AK1C2_HUMAN | AKR1C2   |
| MOL004849 | GC28 | GAN CAO | 1xf0_v | 0.9416 | AK1C3_HUMAN | AKR1C3   |
| MOL004849 | GC28 | GAN CAO | 1xj7_v | 0.9856 | ANDR_HUMAN  | AR       |
| MOL004849 | GC28 | GAN CAO | 1reu_v | 0.9088 | BMP2_HUMAN  | BMP2     |
| MOL004849 | GC28 | GAN CAO | 1okl_v | 0.929  | CAH2_HUMAN  | CA2      |
| MOL004849 | GC28 | GAN CAO | 1gfw_v | 0.9838 | CASP3_HUMAN | CASP3    |
| MOL004849 | GC28 | GAN CAO | 1rs0_v | 0.988  | CFAB_HUMAN  | CFB      |
| MOL004849 | GC28 | GAN CAO | 1klt_v | 0.9628 | CMA1_HUMAN  | CMA1     |
| MOL004849 | GC28 | GAN CAO | 1yb1_v | 0.9772 | DHB11_HUMAN | HSD17B11 |
| MOL004849 | GC28 | GAN CAO | 2vwu_v | 0.9603 | EPHB4_HUMAN | EPHB4    |
| MOL004849 | GC28 | GAN CAO | 1qku_v | 0.9627 | ESR1_HUMAN  | ESR1     |
| MOL004849 | GC28 | GAN CAO | 2jj3_v | 0.9291 | ESR2_HUMAN  | ESR2     |
| MOL004849 | GC28 | GAN CAO | 1ya8_v | 0.9888 | EST1_HUMAN  | CES1     |
| MOL004849 | GC28 | GAN CAO | 1d7i_v | 0.9446 | FKB1A_HUMAN | FKBP1A   |
| MOL004849 | GC28 | GAN CAO | 1ogs_v | 0.9671 | GLCM_HUMAN  | GBA      |
| MOL004849 | GC28 | GAN CAO | 1glq_v | 0.9466 | LYAM3_HUMAN | SELP     |
| MOL004849 | GC28 | GAN CAO | 1uki_v | 0.9943 | MK08_HUMAN  | MAPK8    |
| MOL004849 | GC28 | GAN CAO | 1pmv_v | 0.9986 | MK10_HUMAN  | MAPK10   |
| MOL004849 | GC28 | GAN CAO | 1bm6_v | 0.9681 | MMP3_HUMAN  | MMP3     |

|           |      |         |        |        |             |          |
|-----------|------|---------|--------|--------|-------------|----------|
| MOL004849 | GC28 | GAN CAO | 3bgp_v | 1      | P11309      | PIM1     |
| MOL004849 | GC28 | GAN CAO | 3eqm_v | 0.9748 | P11511      | CYP19A1  |
| MOL004849 | GC28 | GAN CAO | 1w8m_v | 0.9282 | P62937      | PPIA     |
| MOL004849 | GC28 | GAN CAO | 1v3q_v | 0.9519 | PNPH_HUMAN  | PNP      |
| MOL004849 | GC28 | GAN CAO | 1nub_v | 0.9482 | SPRC_HUMAN  | SPARC    |
| MOL004849 | GC28 | GAN CAO | 1no9_v | 0.9945 | THRB_HUMAN  | F2       |
| MOL004855 | GC29 | GAN CAO | 1e7e_v | 0.9282 | ALBU_HUMAN  | ALB      |
| MOL004855 | GC29 | GAN CAO | 2pio_v | 0.9823 | ANDR_HUMAN  | AR       |
| MOL004855 | GC29 | GAN CAO | 1l6l_v | 0.9263 | APOA2_HUMAN | APOA2    |
| MOL004855 | GC29 | GAN CAO | 1reu_v | 0.9168 | BMP2_HUMAN  | BMP2     |
| MOL004855 | GC29 | GAN CAO | 1if4_v | 0.9526 | CAH2_HUMAN  | CA2      |
| MOL004855 | GC29 | GAN CAO | 1shj_v | 0.9641 | CASP7_HUMAN | CASP7    |
| MOL004855 | GC29 | GAN CAO | 1rs0_v | 0.9034 | CFAB_HUMAN  | CFB      |
| MOL004855 | GC29 | GAN CAO | 1qku_v | 0.9362 | ESR1_HUMAN  | ESR1     |
| MOL004855 | GC29 | GAN CAO | 1qkm_v | 0.9496 | ESR2_HUMAN  | ESR2     |
| MOL004855 | GC29 | GAN CAO | 1ya8_v | 0.9448 | EST1_HUMAN  | CES1     |
| MOL004855 | GC29 | GAN CAO | 1ogs_v | 0.9524 | GLCM_HUMAN  | GBA      |
| MOL004855 | GC29 | GAN CAO | 1lbk_v | 0.9737 | GSTP1_HUMAN | GSTP1    |
| MOL004855 | GC29 | GAN CAO | 2obj_v | 0.9642 | P11309      | PIM1     |
| MOL004855 | GC29 | GAN CAO | 2jbp_v | 0.984  | P49137      | MAPKAPK2 |
| MOL004855 | GC29 | GAN CAO | 3exo_v | 0.9667 | P56817      | BACE1    |
| MOL004855 | GC29 | GAN CAO | 1w8l_v | 0.9714 | P62937      | PPIA     |
| MOL004855 | GC29 | GAN CAO | 1v3q_v | 0.972  | PNPH_HUMAN  | PNP      |
| MOL004855 | GC29 | GAN CAO | 1w7h_v | 0.9773 | Q16539      | MAPK14   |
| MOL004855 | GC29 | GAN CAO | 1q8m_v | 0.94   | Q9NP99      | TREM1    |
| MOL004855 | GC29 | GAN CAO | 1p49_v | 0.9613 | STS_HUMAN   | STS      |
| MOL004855 | GC29 | GAN CAO | 1dvz_v | 0.9599 | TTHY_HUMAN  | TTR      |
| MOL000239 | GC3  | GAN CAO | 1xlu_v | 0.9691 | CHLE_HUMAN  | BCHE     |
| MOL000239 | GC3  | GAN CAO | 2pog_v | 0.9754 | ESR1_HUMAN  | ESR1     |
| MOL000239 | GC3  | GAN CAO | 1ogs_v | 0.9662 | GLCM_HUMAN  | GBA      |
| MOL000239 | GC3  | GAN CAO | 1yxx_v | 0.9619 | PIM1_HUMAN  | PIM1     |
| MOL004856 | GC30 | GAN CAO | 1e7e_v | 0.9484 | ALBU_HUMAN  | ALB      |
| MOL004856 | GC30 | GAN CAO | 1x97_v | 0.9038 | ALDR_HUMAN  | AKR1B1   |
| MOL004856 | GC30 | GAN CAO | 2pir_v | 0.9779 | ANDR_HUMAN  | AR       |
| MOL004856 | GC30 | GAN CAO | 1l6l_v | 0.9705 | APOA2_HUMAN | APOA2    |
| MOL004856 | GC30 | GAN CAO | 2ohp_v | 0.928  | BACE1_HUMAN | BACE1    |
| MOL004856 | GC30 | GAN CAO | 1if4_v | 0.9541 | CAH2_HUMAN  | CA2      |
| MOL004856 | GC30 | GAN CAO | 1shj_v | 0.9812 | CASP7_HUMAN | CASP7    |
| MOL004856 | GC30 | GAN CAO | 2bkz_v | 0.9228 | CCNA2_HUMAN | CCNA2    |
| MOL004856 | GC30 | GAN CAO | 1unh_v | 0.9291 | CD5R1_HUMAN | CDK5R1   |
| MOL004856 | GC30 | GAN CAO | 1rs0_v | 0.9903 | CFAB_HUMAN  | CFB      |
| MOL004856 | GC30 | GAN CAO | 1p0i_v | 0.9269 | CHLE_HUMAN  | BCHE     |

|           |      |         |        |        |             |          |
|-----------|------|---------|--------|--------|-------------|----------|
| MOL004856 | GC30 | GAN CAO | 2vwu_v | 0.9512 | EPHB4_HUMAN | EPHB4    |
| MOL004856 | GC30 | GAN CAO | 1x7r_v | 0.9783 | ESR1_HUMAN  | ESR1     |
| MOL004856 | GC30 | GAN CAO | 1qkm_v | 0.9809 | ESR2_HUMAN  | ESR2     |
| MOL004856 | GC30 | GAN CAO | 1ya8_v | 0.9433 | EST1_HUMAN  | CES1     |
| MOL004856 | GC30 | GAN CAO | 1ogs_v | 0.969  | GLCM_HUMAN  | GBA      |
| MOL004856 | GC30 | GAN CAO | 2uyi_v | 0.9685 | KIF11_HUMAN | KIF11    |
| MOL004856 | GC30 | GAN CAO | 1pme_v | 0.996  | MK01_HUMAN  | MAPK1    |
| MOL004856 | GC30 | GAN CAO | 1uki_v | 0.9535 | MK08_HUMAN  | MAPK8    |
| MOL004856 | GC30 | GAN CAO | 3cgf_v | 0.9642 | MK10_HUMAN  | MAPK10   |
| MOL004856 | GC30 | GAN CAO | 1bm6_v | 0.9827 | MMP3_HUMAN  | MMP3     |
| MOL004856 | GC30 | GAN CAO | 3eqm_v | 0.9244 | P11511      | CYP19A1  |
| MOL004856 | GC30 | GAN CAO | 1jvp_v | 0.9573 | P24941      | CDK2     |
| MOL004856 | GC30 | GAN CAO | 3cjf_v | 0.9642 | P35968      | KDR      |
| MOL004856 | GC30 | GAN CAO | 2jbp_v | 0.9889 | P49137      | 1APKAPK2 |
| MOL004856 | GC30 | GAN CAO | 1xoz_v | 0.9839 | PDE5A_HUMAN | PDE5A    |
| MOL004856 | GC30 | GAN CAO | 1yxx_v | 0.9942 | PIM1_HUMAN  | PIM1     |
| MOL004856 | GC30 | GAN CAO | 1wbo_v | 0.9964 | Q16539      | MAPK14   |
| MOL004856 | GC30 | GAN CAO | 1p49_v | 0.9725 | STS_HUMAN   | STS      |
| MOL004856 | GC30 | GAN CAO | 1no9_v | 0.9121 | THRB_HUMAN  | F2       |
| MOL004856 | GC30 | GAN CAO | 1dvz_v | 0.9569 | TTHY_HUMAN  | TTR      |
| MOL004857 | GC31 | GAN CAO | 1e7e_v | 0.942  | ALBU_HUMAN  | ALB      |
| MOL004857 | GC31 | GAN CAO | 2pir_v | 0.9942 | ANDR_HUMAN  | AR       |
| MOL004857 | GC31 | GAN CAO | 1l6l_v | 0.9666 | APOA2_HUMAN | APOA2    |
| MOL004857 | GC31 | GAN CAO | 1if4_v | 0.9817 | CAH2_HUMAN  | CA2      |
| MOL004857 | GC31 | GAN CAO | 1shj_v | 0.9772 | CASP7_HUMAN | CASP7    |
| MOL004857 | GC31 | GAN CAO | 1unh_v | 0.9045 | CD5R1_HUMAN | CDK5R1   |
| MOL004857 | GC31 | GAN CAO | 1rs0_v | 0.9984 | CFAB_HUMAN  | CFB      |
| MOL004857 | GC31 | GAN CAO | 1p0i_v | 0.9366 | CHLE_HUMAN  | BCHE     |
| MOL004857 | GC31 | GAN CAO | 1vec_v | 0.9172 | DDX6_HUMAN  | DDX6     |
| MOL004857 | GC31 | GAN CAO | 2ocf_v | 0.98   | ESR1_HUMAN  | ESR1     |
| MOL004857 | GC31 | GAN CAO | 1qkm_v | 0.9742 | ESR2_HUMAN  | ESR2     |
| MOL004857 | GC31 | GAN CAO | 1ya8_v | 0.9506 | EST1_HUMAN  | CES1     |
| MOL004857 | GC31 | GAN CAO | 1ogs_v | 0.9624 | GLCM_HUMAN  | GBA      |
| MOL004857 | GC31 | GAN CAO | 2fky_v | 0.943  | KIF11_HUMAN | KIF11    |
| MOL004857 | GC31 | GAN CAO | 1uki_v | 0.9415 | MK08_HUMAN  | MAPK8    |
| MOL004857 | GC31 | GAN CAO | 3cgf_v | 0.9841 | MK10_HUMAN  | MAPK10   |
| MOL004857 | GC31 | GAN CAO | 1xur_v | 0.9128 | MMP13_HUMAN | MMP13    |
| MOL004857 | GC31 | GAN CAO | 3cjf_v | 0.9842 | P35968      | KDR      |
| MOL004857 | GC31 | GAN CAO | 2jbp_v | 0.9975 | P49137      | 1APKAPK2 |
| MOL004857 | GC31 | GAN CAO | 1w8l_v | 0.9178 | P62937      | PPIA     |
| MOL004857 | GC31 | GAN CAO | 1yxx_v | 0.9843 | PIM1_HUMAN  | PIM1     |
| MOL004857 | GC31 | GAN CAO | 2ovm_v | 0.9365 | PRGR_HUMAN  | PGR      |

|           |      |         |        |        |             |        |
|-----------|------|---------|--------|--------|-------------|--------|
| MOL004857 | GC31 | GAN CAO | 1w7h_v | 0.9955 | Q16539      | MAPK14 |
| MOL004857 | GC31 | GAN CAO | 1z68_v | 0.9797 | SEPR_HUMAN  | FAP    |
| MOL004857 | GC31 | GAN CAO | 1p49_v | 0.9709 | STS_HUMAN   | STS    |
| MOL004857 | GC31 | GAN CAO | 1no9_v | 0.9114 | THRB_HUMAN  | F2     |
| MOL004857 | GC31 | GAN CAO | 1dvz_v | 0.9707 | TTHY_HUMAN  | TTR    |
| MOL004860 | GC32 | GAN CAO | 1k59_v | 0.9523 | ANG1_HUMAN  | ANG    |
| MOL004860 | GC32 | GAN CAO | 1bzm_v | 0.9423 | CAH1_HUMAN  | CA1    |
| MOL004860 | GC32 | GAN CAO | 1jd0_v | 0.9403 | CAH12_HUMAN | CA12   |
| MOL004860 | GC32 | GAN CAO | 1oq5_v | 0.9722 | CAH2_HUMAN  | CA2    |
| MOL004860 | GC32 | GAN CAO | 1lyw_v | 0.935  | CATD_HUMAN  | CTSD   |
| MOL004860 | GC32 | GAN CAO | 1h1p_v | 0.9789 | CCNA2_HUMAN | CCNA2  |
| MOL004860 | GC32 | GAN CAO | 2cgw_v | 0.9568 | CHK1_HUMAN  | CHEK1  |
| MOL004860 | GC32 | GAN CAO | 1p0i_v | 0.9443 | CHLE_HUMAN  | BCHE   |
| MOL004860 | GC32 | GAN CAO | 1klt_v | 0.92   | CMA1_HUMAN  | CMA1   |
| MOL004860 | GC32 | GAN CAO | 1vec_v | 0.9196 | DDX6_HUMAN  | DDX6   |
| MOL004860 | GC32 | GAN CAO | 2itx_v | 0.9051 | EGFR_HUMAN  | EGFR   |
| MOL004860 | GC32 | GAN CAO | 2vwu_v | 0.9607 | EPHB4_HUMAN | EPHB4  |
| MOL004860 | GC32 | GAN CAO | 1qku_v | 0.928  | ESR1_HUMAN  | ESR1   |
| MOL004860 | GC32 | GAN CAO | 1ovz_v | 0.9172 | FCAR_HUMAN  | FCAR   |
| MOL004860 | GC32 | GAN CAO | 1ogs_v | 0.9577 | GLCM_HUMAN  | GBA    |
| MOL004860 | GC32 | GAN CAO | 1md3_v | 0.9328 | GSTP1_HUMAN | GSTP1  |
| MOL004860 | GC32 | GAN CAO | 2hck_v | 0.9889 | HCK_HUMAN   | HCK    |
| MOL004860 | GC32 | GAN CAO | 1eub_v | 0.9087 | MMP13_HUMAN | MMP13  |
| MOL004860 | GC32 | GAN CAO | 1smd_v | 0.9129 | P04745      | AMY1A  |
| MOL004860 | GC32 | GAN CAO | 2pin_v | 0.9348 | P10828      | THRB   |
| MOL004860 | GC32 | GAN CAO | 3fzh_v | 0.9483 | P11142      | HSPA8  |
| MOL004860 | GC32 | GAN CAO | 1e1x_v | 0.9639 | P24941      | CDK2   |
| MOL004860 | GC32 | GAN CAO | 1w8m_v | 0.954  | P62937      | PPIA   |
| MOL004860 | GC32 | GAN CAO | 1xn0_v | 0.9831 | PDE4B_HUMAN | PDE4B  |
| MOL004860 | GC32 | GAN CAO | 1yxx_v | 0.9692 | PIM1_HUMAN  | PIM1   |
| MOL004860 | GC32 | GAN CAO | 1v3q_v | 0.9555 | PNPH_HUMAN  | PNP    |
| MOL004860 | GC32 | GAN CAO | 1cb0_v | 0.9018 | Q13126      | MTAP   |
| MOL004860 | GC32 | GAN CAO | 1q33_v | 0.9855 | Q9BW91      | NUDT9  |
| MOL004860 | GC32 | GAN CAO | 1z68_v | 0.9697 | SEPR_HUMAN  | FAP    |
| MOL004860 | GC32 | GAN CAO | 1m9z_v | 0.9441 | TGFR2_HUMAN | TGFR2  |
| MOL004860 | GC32 | GAN CAO | 1dvz_v | 0.9779 | TTHY_HUMAN  | TTR    |
| MOL004860 | GC32 | GAN CAO | 1fv9_v | 0.9054 | UROK_HUMAN  | PLAU   |
| MOL004863 | GC33 | GAN CAO | 1j96_v | 0.9853 | AK1C2_HUMAN | AKR1C2 |
| MOL004863 | GC33 | GAN CAO | 1e7e_v | 0.9137 | ALBU_HUMAN  | ALB    |
| MOL004863 | GC33 | GAN CAO | 2pir_v | 0.9246 | ANDR_HUMAN  | AR     |
| MOL004863 | GC33 | GAN CAO | 1l6l_v | 0.9507 | APOA2_HUMAN | APOA2  |
| MOL004863 | GC33 | GAN CAO | 1reu_v | 0.9548 | BMP2_HUMAN  | BMP2   |

|           |      |         |        |        |             |          |
|-----------|------|---------|--------|--------|-------------|----------|
| MOL004863 | GC33 | GAN CAO | 2osf_v | 0.975  | CAH2_HUMAN  | CA2      |
| MOL004863 | GC33 | GAN CAO | 1shj_v | 0.9631 | CASP7_HUMAN | CASP7    |
| MOL004863 | GC33 | GAN CAO | 1lyw_v | 0.9005 | CATD_HUMAN  | CTSD     |
| MOL004863 | GC33 | GAN CAO | 1rs0_v | 0.9736 | CFAB_HUMAN  | CFB      |
| MOL004863 | GC33 | GAN CAO | 2cgx_v | 0.9595 | CHK1_HUMAN  | CHEK1    |
| MOL004863 | GC33 | GAN CAO | 1xlu_v | 0.9806 | CHLE_HUMAN  | BCHE     |
| MOL004863 | GC33 | GAN CAO | 2itx_v | 0.9436 | EGFR_HUMAN  | EGFR     |
| MOL004863 | GC33 | GAN CAO | 2qa8_v | 0.9624 | ESR1_HUMAN  | ESR1     |
| MOL004863 | GC33 | GAN CAO | 1qkm_v | 0.9486 | ESR2_HUMAN  | ESR2     |
| MOL004863 | GC33 | GAN CAO | 1ya8_v | 0.9206 | EST1_HUMAN  | CES1     |
| MOL004863 | GC33 | GAN CAO | 1md3_v | 0.9244 | GSTP1_HUMAN | GSTP1    |
| MOL004863 | GC33 | GAN CAO | 2fky_v | 0.95   | KIF11_HUMAN | KIF11    |
| MOL004863 | GC33 | GAN CAO | 2g01_v | 0.9478 | MK08_HUMAN  | MAPK8    |
| MOL004863 | GC33 | GAN CAO | 1eub_v | 0.9515 | MMP13_HUMAN | MMP13    |
| MOL004863 | GC33 | GAN CAO | 3eqm_v | 0.9133 | P11511      | CYP19A1  |
| MOL004863 | GC33 | GAN CAO | 2jbp_v | 0.9826 | P49137      | 4APKAPK2 |
| MOL004863 | GC33 | GAN CAO | 1w8l_v | 0.9399 | P62937      | PPIA     |
| MOL004863 | GC33 | GAN CAO | 1yxx_v | 0.9759 | PIM1_HUMAN  | PIM1     |
| MOL004863 | GC33 | GAN CAO | 1v3q_v | 0.9555 | PNPH_HUMAN  | PNP      |
| MOL004863 | GC33 | GAN CAO | 1w7h_v | 0.9925 | Q16539      | MAPK14   |
| MOL004863 | GC33 | GAN CAO | 1z68_v | 0.9828 | SEPR_HUMAN  | FAP      |
| MOL004863 | GC33 | GAN CAO | 1p49_v | 0.9559 | STS_HUMAN   | STS      |
| MOL004863 | GC33 | GAN CAO | 1dvz_v | 0.9807 | TTHY_HUMAN  | TTR      |
| MOL004864 | GC34 | GAN CAO | 1j96_v | 0.9907 | AK1C2_HUMAN | AKR1C2   |
| MOL004864 | GC34 | GAN CAO | 1e7e_v | 0.916  | ALBU_HUMAN  | ALB      |
| MOL004864 | GC34 | GAN CAO | 1xow_v | 0.9672 | ANDR_HUMAN  | AR       |
| MOL004864 | GC34 | GAN CAO | 1l6l_v | 0.9514 | APOA2_HUMAN | APOA2    |
| MOL004864 | GC34 | GAN CAO | 2ohp_v | 0.9265 | BACE1_HUMAN | BACE1    |
| MOL004864 | GC34 | GAN CAO | 1reu_v | 0.9499 | BMP2_HUMAN  | BMP2     |
| MOL004864 | GC34 | GAN CAO | 1if4_v | 0.9819 | CAH2_HUMAN  | CA2      |
| MOL004864 | GC34 | GAN CAO | 1shj_v | 0.968  | CASP7_HUMAN | CASP7    |
| MOL004864 | GC34 | GAN CAO | 1rs0_v | 0.9829 | CFAB_HUMAN  | CFB      |
| MOL004864 | GC34 | GAN CAO | 1xlu_v | 0.9811 | CHLE_HUMAN  | BCHE     |
| MOL004864 | GC34 | GAN CAO | 2vwu_v | 0.9128 | EPHB4_HUMAN | EPHB4    |
| MOL004864 | GC34 | GAN CAO | 1x7r_v | 0.9706 | ESR1_HUMAN  | ESR1     |
| MOL004864 | GC34 | GAN CAO | 1qkm_v | 0.9821 | ESR2_HUMAN  | ESR2     |
| MOL004864 | GC34 | GAN CAO | 1lbk_v | 0.9476 | GSTP1_HUMAN | GSTP1    |
| MOL004864 | GC34 | GAN CAO | 2fky_v | 0.9186 | KIF11_HUMAN | KIF11    |
| MOL004864 | GC34 | GAN CAO | 2g01_v | 0.9155 | MK08_HUMAN  | MAPK8    |
| MOL004864 | GC34 | GAN CAO | 2obj_v | 0.9643 | P11309      | PIM1     |
| MOL004864 | GC34 | GAN CAO | 2jbp_v | 0.9885 | P49137      | 4APKAPK2 |
| MOL004864 | GC34 | GAN CAO | 1w8l_v | 0.9126 | P62937      | PPIA     |

|           |      |         |        |        |             |          |
|-----------|------|---------|--------|--------|-------------|----------|
| MOL004864 | GC34 | GAN CAO | 1p49_v | 0.953  | STS_HUMAN   | STS      |
| MOL004864 | GC34 | GAN CAO | 1dvz_v | 0.9943 | TTHY_HUMAN  | TTR      |
| MOL004866 | GC35 | GAN CAO | 1j96_v | 0.9932 | AK1C2_HUMAN | AKR1C2   |
| MOL004866 | GC35 | GAN CAO | 1e7e_v | 0.9341 | ALBU_HUMAN  | ALB      |
| MOL004866 | GC35 | GAN CAO | 1x97_v | 0.9308 | ALDR_HUMAN  | AKR1B1   |
| MOL004866 | GC35 | GAN CAO | 2ama_v | 0.9339 | ANDR_HUMAN  | AR       |
| MOL004866 | GC35 | GAN CAO | 1oj9_v | 0.9407 | AOFB_HUMAN  | MAOB     |
| MOL004866 | GC35 | GAN CAO | 116l_v | 0.9636 | APOA2_HUMAN | APOA2    |
| MOL004866 | GC35 | GAN CAO | 2ohp_v | 0.9037 | BACE1_HUMAN | BACE1    |
| MOL004866 | GC35 | GAN CAO | 1reu_v | 0.9161 | BMP2_HUMAN  | BMP2     |
| MOL004866 | GC35 | GAN CAO | 1oq5_v | 0.9783 | CAH2_HUMAN  | CA2      |
| MOL004866 | GC35 | GAN CAO | 1shj_v | 0.9746 | CASP7_HUMAN | CASP7    |
| MOL004866 | GC35 | GAN CAO | 1lyw_v | 0.9237 | CATD_HUMAN  | CTSD     |
| MOL004866 | GC35 | GAN CAO | 2f1g_v | 0.9097 | CATS_HUMAN  | CTSS     |
| MOL004866 | GC35 | GAN CAO | 2bkz_v | 0.9367 | CCNA2_HUMAN | CCNA2    |
| MOL004866 | GC35 | GAN CAO | 1xo2_v | 0.904  | CDK6_HUMAN  | CDK6     |
| MOL004866 | GC35 | GAN CAO | 1rs0_v | 0.9616 | CFAB_HUMAN  | CFB      |
| MOL004866 | GC35 | GAN CAO | 2ywp_v | 0.9616 | CHK1_HUMAN  | CHEK1    |
| MOL004866 | GC35 | GAN CAO | 1xlu_v | 0.9674 | CHLE_HUMAN  | BCHE     |
| MOL004866 | GC35 | GAN CAO | 2pog_v | 0.9595 | ESR1_HUMAN  | ESR1     |
| MOL004866 | GC35 | GAN CAO | 1ogs_v | 0.9668 | GLCM_HUMAN  | GBA      |
| MOL004866 | GC35 | GAN CAO | 2hck_v | 0.9869 | HCK_HUMAN   | HCK      |
| MOL004866 | GC35 | GAN CAO | 3cgf_v | 0.9709 | MK10_HUMAN  | MAPK10   |
| MOL004866 | GC35 | GAN CAO | 3cjf_v | 0.9709 | P35968      | KDR      |
| MOL004866 | GC35 | GAN CAO | 1yxx_v | 0.9527 | PIM1_HUMAN  | PIM1     |
| MOL004866 | GC35 | GAN CAO | 1z68_v | 0.9237 | SEPR_HUMAN  | FAP      |
| MOL004866 | GC35 | GAN CAO | 1p49_v | 0.9676 | STS_HUMAN   | STS      |
| MOL004866 | GC35 | GAN CAO | 1no9_v | 0.9429 | THRB_HUMAN  | F2       |
| MOL004866 | GC35 | GAN CAO | 1dvz_v | 0.9713 | TTHY_HUMAN  | TTR      |
| MOL004879 | GC36 | GAN CAO | 1j96_v | 0.9664 | AK1C2_HUMAN | AKR1C2   |
| MOL004879 | GC36 | GAN CAO | 1e7e_v | 0.9512 | ALBU_HUMAN  | ALB      |
| MOL004879 | GC36 | GAN CAO | 2pio_v | 0.9313 | ANDR_HUMAN  | AR       |
| MOL004879 | GC36 | GAN CAO | 1oj9_v | 1      | AOFB_HUMAN  | MAOB     |
| MOL004879 | GC36 | GAN CAO | 116l_v | 0.9713 | APOA2_HUMAN | APOA2    |
| MOL004879 | GC36 | GAN CAO | 1reu_v | 0.9391 | BMP2_HUMAN  | BMP2     |
| MOL004879 | GC36 | GAN CAO | 3dej_v | 0.9833 | CASP3_HUMAN | CASP3    |
| MOL004879 | GC36 | GAN CAO | 1shj_v | 0.9791 | CASP7_HUMAN | CASP7    |
| MOL004879 | GC36 | GAN CAO | 1rs0_v | 0.9258 | CFAB_HUMAN  | CFB      |
| MOL004879 | GC36 | GAN CAO | 1p0i_v | 0.9308 | CHLE_HUMAN  | BCHE     |
| MOL004879 | GC36 | GAN CAO | 1yb1_v | 0.962  | DHB11_HUMAN | HSD17B11 |
| MOL004879 | GC36 | GAN CAO | 1x7r_v | 0.9828 | ESR1_HUMAN  | ESR1     |
| MOL004879 | GC36 | GAN CAO | 1qkm_v | 0.9877 | ESR2_HUMAN  | ESR2     |

|           |      |         |        |        |             |          |
|-----------|------|---------|--------|--------|-------------|----------|
| MOL004879 | GC36 | GAN CAO | 1ya8_v | 0.9504 | EST1_HUMAN  | CES1     |
| MOL004879 | GC36 | GAN CAO | 1ya3_v | 0.9498 | MCR_HUMAN   | NR3C2    |
| MOL004879 | GC36 | GAN CAO | 1pme_v | 0.9875 | MK01_HUMAN  | MAPK1    |
| MOL004879 | GC36 | GAN CAO | 1uki_v | 0.9917 | MK08_HUMAN  | MAPK8    |
| MOL004879 | GC36 | GAN CAO | 1pmv_v | 0.9961 | MK10_HUMAN  | MAPK10   |
| MOL004879 | GC36 | GAN CAO | 1bm6_v | 0.9651 | MMP3_HUMAN  | MMP3     |
| MOL004879 | GC36 | GAN CAO | 3dcw_v | 0.9844 | P00918      | CA2      |
| MOL004879 | GC36 | GAN CAO | 2jbp_v | 0.9836 | P49137      | MAPKAPK2 |
| MOL004879 | GC36 | GAN CAO | 1w8l_v | 0.9751 | P62937      | PPIA     |
| MOL004879 | GC36 | GAN CAO | 1yxx_v | 0.9901 | PIM1_HUMAN  | PIM1     |
| MOL004879 | GC36 | GAN CAO | 2a4z_v | 0.9767 | PK3CG_HUMAN | PIK3CG   |
| MOL004879 | GC36 | GAN CAO | 1wbw_v | 0.9922 | Q16539      | MAPK14   |
| MOL004879 | GC36 | GAN CAO | 1q8m_v | 0.9741 | Q9NP99      | TREM1    |
| MOL004879 | GC36 | GAN CAO | 1p49_v | 0.9744 | STS_HUMAN   | STS      |
| MOL004879 | GC36 | GAN CAO | 1j78_v | 0.9198 | VTDB_HUMAN  | GC       |
| MOL004882 | GC37 | GAN CAO | 1xf0_v | 0.9272 | AK1C3_HUMAN | AKR1C3   |
| MOL004882 | GC37 | GAN CAO | 1e7e_v | 0.9622 | ALBU_HUMAN  | ALB      |
| MOL004882 | GC37 | GAN CAO | 1oj9_v | 0.9865 | AOFB_HUMAN  | MAOB     |
| MOL004882 | GC37 | GAN CAO | 1l6l_v | 0.9671 | APOA2_HUMAN | APOA2    |
| MOL004882 | GC37 | GAN CAO | 2ohp_v | 0.9014 | BACE1_HUMAN | BACE1    |
| MOL004882 | GC37 | GAN CAO | 1if4_v | 0.9819 | CAH2_HUMAN  | CA2      |
| MOL004882 | GC37 | GAN CAO | 1gfw_v | 0.9153 | CASP3_HUMAN | CASP3    |
| MOL004882 | GC37 | GAN CAO | 1shj_v | 0.9641 | CASP7_HUMAN | CASP7    |
| MOL004882 | GC37 | GAN CAO | 1rs0_v | 0.9651 | CFAB_HUMAN  | CFB      |
| MOL004882 | GC37 | GAN CAO | 1yb1_v | 0.9087 | DHB11_HUMAN | HSD17B11 |
| MOL004882 | GC37 | GAN CAO | 1qku_v | 0.9911 | ESR1_HUMAN  | ESR1     |
| MOL004882 | GC37 | GAN CAO | 2jj3_v | 0.9083 | ESR2_HUMAN  | ESR2     |
| MOL004882 | GC37 | GAN CAO | 1ya8_v | 0.9434 | EST1_HUMAN  | CES1     |
| MOL004882 | GC37 | GAN CAO | 1pme_v | 0.96   | MK01_HUMAN  | MAPK1    |
| MOL004882 | GC37 | GAN CAO | 1uki_v | 0.9103 | MK08_HUMAN  | MAPK8    |
| MOL004882 | GC37 | GAN CAO | 1pmv_v | 0.9065 | MK10_HUMAN  | MAPK10   |
| MOL004882 | GC37 | GAN CAO | 1jvp_v | 0.955  | P24941      | CDK2     |
| MOL004882 | GC37 | GAN CAO | 1w8l_v | 0.9802 | P62937      | PPIA     |
| MOL004882 | GC37 | GAN CAO | 1yxx_v | 0.9638 | PIM1_HUMAN  | PIM1     |
| MOL004882 | GC37 | GAN CAO | 1wbo_v | 0.9838 | Q16539      | MAPK14   |
| MOL004882 | GC37 | GAN CAO | 1q8m_v | 0.9147 | Q9NP99      | TREM1    |
| MOL004882 | GC37 | GAN CAO | 1p49_v | 0.9707 | STS_HUMAN   | STS      |
| MOL004882 | GC37 | GAN CAO | 1no9_v | 0.9664 | THRB_HUMAN  | F2       |
| MOL004883 | GC38 | GAN CAO | 1e7e_v | 0.9706 | ALBU_HUMAN  | ALB      |
| MOL004883 | GC38 | GAN CAO | 1l6l_v | 0.9775 | APOA2_HUMAN | APOA2    |
| MOL004883 | GC38 | GAN CAO | 2ohp_v | 0.9459 | BACE1_HUMAN | BACE1    |
| MOL004883 | GC38 | GAN CAO | 1if4_v | 0.9878 | CAH2_HUMAN  | CA2      |



|           |      |         |        |        |             |          |
|-----------|------|---------|--------|--------|-------------|----------|
| MOL004883 | GC38 | GAN CAO | 1gfw_v | 0.952  | CASP3_HUMAN | CASP3    |
| MOL004883 | GC38 | GAN CAO | 1shj_v | 0.9673 | CASP7_HUMAN | CASP7    |
| MOL004883 | GC38 | GAN CAO | 2f1g_v | 0.9136 | CATS_HUMAN  | CTSS     |
| MOL004883 | GC38 | GAN CAO | 1rs0_v | 0.9865 | CFAB_HUMAN  | CFB      |
| MOL004883 | GC38 | GAN CAO | 1p0i_v | 0.9674 | CHLE_HUMAN  | BCHE     |
| MOL004883 | GC38 | GAN CAO | 1klt_v | 0.9801 | CMA1_HUMAN  | CMA1     |
| MOL004883 | GC38 | GAN CAO | 2vwu_v | 0.941  | EPHB4_HUMAN | EPHB4    |
| MOL004883 | GC38 | GAN CAO | 1x7r_v | 0.9514 | ESR1_HUMAN  | ESR1     |
| MOL004883 | GC38 | GAN CAO | 1qkm_v | 0.987  | ESR2_HUMAN  | ESR2     |
| MOL004883 | GC38 | GAN CAO | 1ya8_v | 0.9545 | EST1_HUMAN  | CES1     |
| MOL004883 | GC38 | GAN CAO | 1ogs_v | 0.9828 | GLCM_HUMAN  | GBA      |
| MOL004883 | GC38 | GAN CAO | 2oji_v | 0.9664 | MK01_HUMAN  | MAPK1    |
| MOL004883 | GC38 | GAN CAO | 1uki_v | 0.9252 | MK08_HUMAN  | MAPK8    |
| MOL004883 | GC38 | GAN CAO | 3cgf_v | 0.9441 | MK10_HUMAN  | MAPK10   |
| MOL004883 | GC38 | GAN CAO | 3cjf_v | 0.9441 | P35968      | KDR      |
| MOL004883 | GC38 | GAN CAO | 2jbp_v | 0.9904 | P49137      | 1APKAPK2 |
| MOL004883 | GC38 | GAN CAO | 1w8l_v | 0.9886 | P62937      | PPIA     |
| MOL004883 | GC38 | GAN CAO | 1xoz_v | 0.902  | PDE5A_HUMAN | PDE5A    |
| MOL004883 | GC38 | GAN CAO | 2o65_v | 0.9691 | PIM1_HUMAN  | PIM1     |
| MOL004883 | GC38 | GAN CAO | 1v3q_v | 0.9558 | PNPH_HUMAN  | PNP      |
| MOL004883 | GC38 | GAN CAO | 1wbo_v | 0.9899 | Q16539      | MAPK14   |
| MOL004883 | GC38 | GAN CAO | 1q8m_v | 0.9345 | Q9NP99      | TREM1    |
| MOL004883 | GC38 | GAN CAO | 1p49_v | 0.9767 | STS_HUMAN   | STS      |
| MOL004883 | GC38 | GAN CAO | 1dvz_v | 0.9872 | TTHY_HUMAN  | TTR      |
| MOL004884 | GC39 | GAN CAO | 1j96_v | 0.9693 | AK1C2_HUMAN | AKR1C2   |
| MOL004884 | GC39 | GAN CAO | 1xow_v | 0.9457 | ANDR_HUMAN  | AR       |
| MOL004884 | GC39 | GAN CAO | 2ohp_v | 0.9916 | BACE1_HUMAN | BACE1    |
| MOL004884 | GC39 | GAN CAO | 1reu_v | 0.9151 | BMP2_HUMAN  | BMP2     |
| MOL004884 | GC39 | GAN CAO | 2osf_v | 0.9731 | CAH2_HUMAN  | CA2      |
| MOL004884 | GC39 | GAN CAO | 1shj_v | 0.96   | CASP7_HUMAN | CASP7    |
| MOL004884 | GC39 | GAN CAO | 1xlu_v | 0.971  | CHLE_HUMAN  | BCHE     |
| MOL004884 | GC39 | GAN CAO | 1klt_v | 0.9643 | CMA1_HUMAN  | CMA1     |
| MOL004884 | GC39 | GAN CAO | 1m17_v | 0.9132 | EGFR_HUMAN  | EGFR     |
| MOL004884 | GC39 | GAN CAO | 1qkm_v | 0.975  | ESR2_HUMAN  | ESR2     |
| MOL004884 | GC39 | GAN CAO | 1ogs_v | 0.931  | GLCM_HUMAN  | GBA      |
| MOL004884 | GC39 | GAN CAO | 2obj_v | 0.9278 | P11309      | PIM1     |
| MOL004884 | GC39 | GAN CAO | 2p3g_v | 0.9548 | P49137      | 1APKAPK2 |
| MOL004884 | GC39 | GAN CAO | 1w8l_v | 0.9512 | P62937      | PPIA     |
| MOL004884 | GC39 | GAN CAO | 2a4z_v | 0.9534 | PK3CG_HUMAN | PIK3CG   |
| MOL004884 | GC39 | GAN CAO | 1w7h_v | 0.9705 | Q16539      | MAPK14   |
| MOL004884 | GC39 | GAN CAO | 1q8m_v | 0.9385 | Q9NP99      | TREM1    |
| MOL004884 | GC39 | GAN CAO | 2roy_v | 0.9559 | TTHY_HUMAN  | TTR      |

|           |      |         |        |        |             |          |
|-----------|------|---------|--------|--------|-------------|----------|
| MOL002565 | GC4  | GAN CAO | 1e7e_v | 0.9806 | ALBU_HUMAN  | ALB      |
| MOL002565 | GC4  | GAN CAO | 2pir_v | 0.9576 | ANDR_HUMAN  | AR       |
| MOL002565 | GC4  | GAN CAO | 1l6l_v | 0.96   | APOA2_HUMAN | APOA2    |
| MOL002565 | GC4  | GAN CAO | 3bmp_v | 0.9904 | BMP2_HUMAN  | BMP2     |
| MOL002565 | GC4  | GAN CAO | 1if4_v | 0.9485 | CAH2_HUMAN  | CA2      |
| MOL002565 | GC4  | GAN CAO | 1qku_v | 0.9752 | ESR1_HUMAN  | ESR1     |
| MOL002565 | GC4  | GAN CAO | 2obj_v | 0.9683 | P11309      | PIM1     |
| MOL002565 | GC4  | GAN CAO | 1w8l_v | 0.9047 | P62937      | PPIA     |
| MOL002565 | GC4  | GAN CAO | 1p49_v | 1      | STS_HUMAN   | STS      |
| MOL004885 | GC40 | GAN CAO | 1j96_v | 0.9699 | AK1C2_HUMAN | AKR1C2   |
| MOL004885 | GC40 | GAN CAO | 2ohp_v | 0.9912 | BACE1_HUMAN | BACE1    |
| MOL004885 | GC40 | GAN CAO | 1reu_v | 0.9151 | BMP2_HUMAN  | BMP2     |
| MOL004885 | GC40 | GAN CAO | 2osf_v | 0.9722 | CAH2_HUMAN  | CA2      |
| MOL004885 | GC40 | GAN CAO | 3dej_v | 0.9511 | CASP3_HUMAN | CASP3    |
| MOL004885 | GC40 | GAN CAO | 1shj_v | 0.9794 | CASP7_HUMAN | CASP7    |
| MOL004885 | GC40 | GAN CAO | 1rs0_v | 0.9296 | CFAB_HUMAN  | CFB      |
| MOL004885 | GC40 | GAN CAO | 1xlu_v | 0.9788 | CHLE_HUMAN  | BCHE     |
| MOL004885 | GC40 | GAN CAO | 1klt_v | 0.9927 | CMA1_HUMAN  | CMA1     |
| MOL004885 | GC40 | GAN CAO | 2hck_v | 0.9694 | HCK_HUMAN   | HCK      |
| MOL004885 | GC40 | GAN CAO | 1pme_v | 0.9422 | MK01_HUMAN  | MAPK1    |
| MOL004885 | GC40 | GAN CAO | 1uki_v | 0.9756 | MK08_HUMAN  | MAPK8    |
| MOL004885 | GC40 | GAN CAO | 1pmv_v | 0.9755 | MK10_HUMAN  | MAPK10   |
| MOL004885 | GC40 | GAN CAO | 1bm6_v | 0.9108 | MMP3_HUMAN  | MMP3     |
| MOL004885 | GC40 | GAN CAO | 1xan_v | 0.9395 | P00390      | GSR      |
| MOL004885 | GC40 | GAN CAO | 2obj_v | 0.9813 | P11309      | PIM1     |
| MOL004885 | GC40 | GAN CAO | 3cjf_v | 0.9424 | P35968      | KDR      |
| MOL004885 | GC40 | GAN CAO | 2p3g_v | 0.9049 | P49137      | 1APKAPK2 |
| MOL004885 | GC40 | GAN CAO | 1w8l_v | 0.9562 | P62937      | PPIA     |
| MOL004885 | GC40 | GAN CAO | 2a4z_v | 0.9488 | PK3CG_HUMAN | PIK3CG   |
| MOL004891 | GC41 | GAN CAO | 1j96_v | 0.9684 | AK1C2_HUMAN | AKR1C2   |
| MOL004891 | GC41 | GAN CAO | 1e7e_v | 1      | ALBU_HUMAN  | ALB      |
| MOL004891 | GC41 | GAN CAO | 1l6l_v | 0.9847 | APOA2_HUMAN | APOA2    |
| MOL004891 | GC41 | GAN CAO | 1reu_v | 0.9829 | BMP2_HUMAN  | BMP2     |
| MOL004891 | GC41 | GAN CAO | 1if4_v | 0.9335 | CAH2_HUMAN  | CA2      |
| MOL004891 | GC41 | GAN CAO | 1shj_v | 0.9437 | CASP7_HUMAN | CASP7    |
| MOL004891 | GC41 | GAN CAO | 2vwu_v | 0.9395 | EPHB4_HUMAN | EPHB4    |
| MOL004891 | GC41 | GAN CAO | 1ya8_v | 0.968  | EST1_HUMAN  | CES1     |
| MOL004891 | GC41 | GAN CAO | 2pg2_v | 0.9021 | KIF11_HUMAN | KIF11    |
| MOL004891 | GC41 | GAN CAO | 2pin_v | 0.9937 | P10828      | THRB     |
| MOL004891 | GC41 | GAN CAO | 2o65_v | 0.9279 | PIM1_HUMAN  | PIM1     |
| MOL004891 | GC41 | GAN CAO | 2a4z_v | 0.9238 | PK3CG_HUMAN | PIK3CG   |
| MOL004891 | GC41 | GAN CAO | 1p49_v | 1      | STS_HUMAN   | STS      |

|           |      |         |        |        |             |          |
|-----------|------|---------|--------|--------|-------------|----------|
| MOL004898 | GC42 | GAN CAO | 1j96_v | 0.9921 | AK1C2_HUMAN | AKR1C2   |
| MOL004898 | GC42 | GAN CAO | 1xf0_v | 0.9532 | AK1C3_HUMAN | AKR1C3   |
| MOL004898 | GC42 | GAN CAO | 1e7e_v | 0.951  | ALBU_HUMAN  | ALB      |
| MOL004898 | GC42 | GAN CAO | 1x97_v | 0.9326 | ALDR_HUMAN  | AKR1B1   |
| MOL004898 | GC42 | GAN CAO | 2pir_v | 0.9747 | ANDR_HUMAN  | AR       |
| MOL004898 | GC42 | GAN CAO | 1l6l_v | 0.9706 | APOA2_HUMAN | APOA2    |
| MOL004898 | GC42 | GAN CAO | 2ohp_v | 0.9855 | BACE1_HUMAN | BACE1    |
| MOL004898 | GC42 | GAN CAO | 1reu_v | 0.9249 | BMP2_HUMAN  | BMP2     |
| MOL004898 | GC42 | GAN CAO | 1if4_v | 0.9818 | CAH2_HUMAN  | CA2      |
| MOL004898 | GC42 | GAN CAO | 3dej_v | 0.9887 | CASP3_HUMAN | CASP3    |
| MOL004898 | GC42 | GAN CAO | 1shj_v | 0.9806 | CASP7_HUMAN | CASP7    |
| MOL004898 | GC42 | GAN CAO | 2f1g_v | 0.9675 | CATS_HUMAN  | CTSS     |
| MOL004898 | GC42 | GAN CAO | 1rs0_v | 0.9944 | CFAB_HUMAN  | CFB      |
| MOL004898 | GC42 | GAN CAO | 2brg_v | 0.909  | CHK1_HUMAN  | CHEK1    |
| MOL004898 | GC42 | GAN CAO | 1xlu_v | 0.9633 | CHLE_HUMAN  | BCHE     |
| MOL004898 | GC42 | GAN CAO | 1tg6_v | 0.9352 | CLPP_HUMAN  | CLPP     |
| MOL004898 | GC42 | GAN CAO | 2itx_v | 0.9502 | EGFR_HUMAN  | EGFR     |
| MOL004898 | GC42 | GAN CAO | 1qku_v | 0.9676 | ESR1_HUMAN  | ESR1     |
| MOL004898 | GC42 | GAN CAO | 2jj3_v | 0.9119 | ESR2_HUMAN  | ESR2     |
| MOL004898 | GC42 | GAN CAO | 1ya8_v | 0.9403 | EST1_HUMAN  | CES1     |
| MOL004898 | GC42 | GAN CAO | 1ogs_v | 0.967  | GLCM_HUMAN  | GBA      |
| MOL004898 | GC42 | GAN CAO | 1lbk_v | 0.9423 | GSTP1_HUMAN | GSTP1    |
| MOL004898 | GC42 | GAN CAO | 2hck_v | 0.9729 | HCK_HUMAN   | HCK      |
| MOL004898 | GC42 | GAN CAO | 1uki_v | 0.9759 | MK08_HUMAN  | MAPK8    |
| MOL004898 | GC42 | GAN CAO | 3cgf_v | 0.9937 | MK10_HUMAN  | MAPK10   |
| MOL004898 | GC42 | GAN CAO | 1eub_v | 0.9953 | MMP13_HUMAN | MMP13    |
| MOL004898 | GC42 | GAN CAO | 1bm6_v | 0.9553 | MMP3_HUMAN  | MMP3     |
| MOL004898 | GC42 | GAN CAO | 2obj_v | 0.9749 | P11309      | PIM1     |
| MOL004898 | GC42 | GAN CAO | 3eqm_v | 0.9814 | P11511      | CYP19A1  |
| MOL004898 | GC42 | GAN CAO | 2exm_v | 0.9265 | P24941      | CDK2     |
| MOL004898 | GC42 | GAN CAO | 3cjf_v | 0.9937 | P35968      | KDR      |
| MOL004898 | GC42 | GAN CAO | 2jbp_v | 0.9885 | P49137      | 1APKAPK2 |
| MOL004898 | GC42 | GAN CAO | 1w8l_v | 0.9301 | P62937      | PPIA     |
| MOL004898 | GC42 | GAN CAO | 1udu_v | 0.9599 | PDE5A_HUMAN | PDE5A    |
| MOL004898 | GC42 | GAN CAO | 1v3q_v | 0.9619 | PNPH_HUMAN  | PNP      |
| MOL004898 | GC42 | GAN CAO | 1wbo_v | 0.9941 | Q16539      | MAPK14   |
| MOL004898 | GC42 | GAN CAO | 1z68_v | 0.9258 | SEPR_HUMAN  | FAP      |
| MOL004898 | GC42 | GAN CAO | 1p49_v | 0.974  | STS_HUMAN   | STS      |
| MOL004898 | GC42 | GAN CAO | 1no9_v | 0.9703 | THRB_HUMAN  | F2       |
| MOL004898 | GC42 | GAN CAO | 2roy_v | 0.957  | TTHY_HUMAN  | TTR      |
| MOL004903 | GC43 | GAN CAO | 2pir_v | 0.925  | ANDR_HUMAN  | AR       |
| MOL004903 | GC43 | GAN CAO | 1jd0_v | 0.9644 | CAH12_HUMAN | CA12     |

|           |      |         |        |        |             |          |
|-----------|------|---------|--------|--------|-------------|----------|
| MOL004903 | GC43 | GAN CAO | 1lyw_v | 0.9287 | CATD_HUMAN  | CTSD     |
| MOL004903 | GC43 | GAN CAO | 1xlw_v | 0.9765 | CHLE_HUMAN  | BCHE     |
| MOL004903 | GC43 | GAN CAO | 1vec_v | 0.9421 | DDX6_HUMAN  | DDX6     |
| MOL004903 | GC43 | GAN CAO | 1md3_v | 0.9462 | GSTP1_HUMAN | GSTP1    |
| MOL004903 | GC43 | GAN CAO | 1pmv_v | 0.9148 | MK10_HUMAN  | MAPK10   |
| MOL004903 | GC43 | GAN CAO | 1cb0_v | 0.9611 | Q13126      | MTAP     |
| MOL004903 | GC43 | GAN CAO | 1q33_v | 0.9591 | Q9BW91      | NUDT9    |
| MOL004903 | GC43 | GAN CAO | 1z68_v | 0.9706 | SEPR_HUMAN  | FAP      |
| MOL004903 | GC43 | GAN CAO | 1m9z_v | 0.962  | TGFR2_HUMAN | TGFBR2   |
| MOL004903 | GC43 | GAN CAO | 1no9_v | 0.9721 | THRB_HUMAN  | F2       |
| MOL004903 | GC43 | GAN CAO | 2roy_v | 0.9342 | TTHY_HUMAN  | TTR      |
| MOL004904 | GC44 | GAN CAO | 1e7a_v | 1      | ALBU_HUMAN  | ALB      |
| MOL004904 | GC44 | GAN CAO | 2pir_v | 0.9073 | ANDR_HUMAN  | AR       |
| MOL004904 | GC44 | GAN CAO | 1oj9_v | 0.9893 | AOFB_HUMAN  | MAOB     |
| MOL004904 | GC44 | GAN CAO | 1reu_v | 0.9891 | BMP2_HUMAN  | BMP2     |
| MOL004904 | GC44 | GAN CAO | 1okl_v | 0.9069 | CAH2_HUMAN  | CA2      |
| MOL004904 | GC44 | GAN CAO | 1shj_v | 0.9815 | CASP7_HUMAN | CASP7    |
| MOL004904 | GC44 | GAN CAO | 1rs0_v | 0.9149 | CFAB_HUMAN  | CFB      |
| MOL004904 | GC44 | GAN CAO | 1dic_v | 0.9336 | CFAD_HUMAN  | CFD      |
| MOL004904 | GC44 | GAN CAO | 1xlu_v | 0.9681 | CHLE_HUMAN  | BCHE     |
| MOL004904 | GC44 | GAN CAO | 1yb1_v | 0.9815 | DHB11_HUMAN | HSD17B11 |
| MOL004904 | GC44 | GAN CAO | 1qku_v | 0.926  | ESR1_HUMAN  | ESR1     |
| MOL004904 | GC44 | GAN CAO | 1qkm_v | 0.986  | ESR2_HUMAN  | ESR2     |
| MOL004904 | GC44 | GAN CAO | 1ya8_v | 0.9414 | EST1_HUMAN  | CES1     |
| MOL004904 | GC44 | GAN CAO | 1d7i_v | 0.9107 | FKB1A_HUMAN | FKBP1A   |
| MOL004904 | GC44 | GAN CAO | 1ogs_v | 0.9709 | GLCM_HUMAN  | GBA      |
| MOL004904 | GC44 | GAN CAO | 1uki_v | 0.973  | MK08_HUMAN  | MAPK8    |
| MOL004904 | GC44 | GAN CAO | 1pmv_v | 0.9957 | MK10_HUMAN  | MAPK10   |
| MOL004904 | GC44 | GAN CAO | 830c_v | 0.9376 | MMP13_HUMAN | MMP13    |
| MOL004904 | GC44 | GAN CAO | 1bm6_v | 0.9628 | MMP3_HUMAN  | MMP3     |
| MOL004904 | GC44 | GAN CAO | 2p3g_v | 0.9046 | P49137      | MAPKAPK2 |
| MOL004904 | GC44 | GAN CAO | 1yxx_v | 0.9749 | PIM1_HUMAN  | PIM1     |
| MOL004904 | GC44 | GAN CAO | 2a4z_v | 0.9125 | PK3CG_HUMAN | PIK3CG   |
| MOL004904 | GC44 | GAN CAO | 1zuc_v | 0.9019 | PRGR_HUMAN  | PGR      |
| MOL004904 | GC44 | GAN CAO | 1w7h_v | 0.9806 | Q16539      | MAPK14   |
| MOL004904 | GC44 | GAN CAO | 1q8m_v | 0.9356 | Q9NP99      | TREM1    |
| MOL004904 | GC44 | GAN CAO | 2roy_v | 0.9652 | TTHY_HUMAN  | TTR      |
| MOL004905 | GC45 | GAN CAO | 1j96_v | 0.9391 | AK1C2_HUMAN | AKR1C2   |
| MOL004905 | GC45 | GAN CAO | 1e7a_v | 0.9645 | ALBU_HUMAN  | ALB      |
| MOL004905 | GC45 | GAN CAO | 2piq_v | 0.984  | ANDR_HUMAN  | AR       |
| MOL004905 | GC45 | GAN CAO | 1oj9_v | 0.9518 | AOFB_HUMAN  | MAOB     |
| MOL004905 | GC45 | GAN CAO | 1bn4_v | 0.9982 | CAH2_HUMAN  | CA2      |

|           |      |         |        |        |             |         |
|-----------|------|---------|--------|--------|-------------|---------|
| MOL004905 | GC45 | GAN CAO | 1rs0_v | 0.9381 | CFAB_HUMAN  | CFB     |
| MOL004905 | GC45 | GAN CAO | 1p0i_v | 0.9267 | CHLE_HUMAN  | BCHE    |
| MOL004905 | GC45 | GAN CAO | 2j5f_v | 0.9413 | EGFR_HUMAN  | EGFR    |
| MOL004905 | GC45 | GAN CAO | 1qkt_v | 0.9656 | ESR1_HUMAN  | ESR1    |
| MOL004905 | GC45 | GAN CAO | 1ya8_v | 0.97   | EST1_HUMAN  | CES1    |
| MOL004905 | GC45 | GAN CAO | 1uki_v | 0.9883 | MK08_HUMAN  | MAPK8   |
| MOL004905 | GC45 | GAN CAO | 1pmv_v | 0.99   | MK10_HUMAN  | MAPK10  |
| MOL004905 | GC45 | GAN CAO | 1bm6_v | 0.9747 | MMP3_HUMAN  | MMP3    |
| MOL004905 | GC45 | GAN CAO | 1pq9_v | 0.9214 | NR1H2_HUMAN | NR1H2   |
| MOL004905 | GC45 | GAN CAO | 3bgp_v | 1      | P11309      | PIM1    |
| MOL004905 | GC45 | GAN CAO | 3eqm_v | 0.932  | P11511      | CYP19A1 |
| MOL004905 | GC45 | GAN CAO | 1w8l_v | 0.9553 | P62937      | PPIA    |
| MOL004905 | GC45 | GAN CAO | 1fm6_v | 0.9637 | PPARG_HUMAN | PPARG   |
| MOL004905 | GC45 | GAN CAO | 3dy6_v | 0.9685 | Q03181      | PPARD   |
| MOL004905 | GC45 | GAN CAO | 1p49_v | 0.9241 | STS_HUMAN   | STS     |
| MOL004905 | GC45 | GAN CAO | 1no9_v | 0.9142 | THRB_HUMAN  | F2      |
| MOL004905 | GC45 | GAN CAO | 1tz8_v | 0.9227 | TTHY_HUMAN  | TTR     |
| MOL004905 | GC45 | GAN CAO | 1j78_v | 0.9683 | VTDB_HUMAN  | GC      |
| MOL004907 | GC46 | GAN CAO | 2ama_v | 0.9552 | ANDR_HUMAN  | AR      |
| MOL004907 | GC46 | GAN CAO | 1oq5_v | 0.9567 | CAH2_HUMAN  | CA2     |
| MOL004907 | GC46 | GAN CAO | 1p0i_v | 0.9322 | CHLE_HUMAN  | BCHE    |
| MOL004907 | GC46 | GAN CAO | 2i0j_v | 0.9827 | ESR1_HUMAN  | ESR1    |
| MOL004907 | GC46 | GAN CAO | 2jj3_v | 0.9676 | ESR2_HUMAN  | ESR2    |
| MOL004907 | GC46 | GAN CAO | 1ya8_v | 0.9453 | EST1_HUMAN  | CES1    |
| MOL004907 | GC46 | GAN CAO | 1d7i_v | 0.9569 | FKB1A_HUMAN | FKBP1A  |
| MOL004907 | GC46 | GAN CAO | 1pme_v | 0.968  | MK01_HUMAN  | MAPK1   |
| MOL004907 | GC46 | GAN CAO | 1yxx_v | 0.9931 | PIM1_HUMAN  | PIM1    |
| MOL004907 | GC46 | GAN CAO | 1w7h_v | 0.9717 | Q16539      | MAPK14  |
| MOL004907 | GC46 | GAN CAO | 1q8m_v | 0.9172 | Q9NP99      | TREM1   |
| MOL004908 | GC47 | GAN CAO | 1j96_v | 0.9601 | AK1C2_HUMAN | AKR1C2  |
| MOL004908 | GC47 | GAN CAO | 1e7e_v | 0.9719 | ALBU_HUMAN  | ALB     |
| MOL004908 | GC47 | GAN CAO | 2pir_v | 0.9629 | ANDR_HUMAN  | AR      |
| MOL004908 | GC47 | GAN CAO | 1l6l_v | 0.9738 | APOA2_HUMAN | APOA2   |
| MOL004908 | GC47 | GAN CAO | 1reu_v | 0.9656 | BMP2_HUMAN  | BMP2    |
| MOL004908 | GC47 | GAN CAO | 1oq5_v | 0.967  | CAH2_HUMAN  | CA2     |
| MOL004908 | GC47 | GAN CAO | 1gwq_v | 0.9417 | ESR1_HUMAN  | ESR1    |
| MOL004908 | GC47 | GAN CAO | 2jj3_v | 0.9842 | ESR2_HUMAN  | ESR2    |
| MOL004908 | GC47 | GAN CAO | 1ya8_v | 0.9659 | EST1_HUMAN  | CES1    |
| MOL004908 | GC47 | GAN CAO | 1yxx_v | 0.9626 | PIM1_HUMAN  | PIM1    |
| MOL004908 | GC47 | GAN CAO | 2a4z_v | 0.9715 | PK3CG_HUMAN | PIK3CG  |
| MOL004908 | GC47 | GAN CAO | 1wbw_v | 0.9872 | Q16539      | MAPK14  |
| MOL004908 | GC47 | GAN CAO | 1p49_v | 0.9711 | STS_HUMAN   | STS     |

|           |      |         |        |        |             |          |
|-----------|------|---------|--------|--------|-------------|----------|
| MOL004910 | GC48 | GAN CAO | 1j96_v | 0.9596 | AK1C2_HUMAN | AKR1C2   |
| MOL004910 | GC48 | GAN CAO | 2pio_v | 0.9753 | ANDR_HUMAN  | AR       |
| MOL004910 | GC48 | GAN CAO | 1l6l_v | 0.9165 | APOA2_HUMAN | APOA2    |
| MOL004910 | GC48 | GAN CAO | 2ohp_v | 0.9066 | BACE1_HUMAN | BACE1    |
| MOL004910 | GC48 | GAN CAO | 1reu_v | 0.9698 | BMP2_HUMAN  | BMP2     |
| MOL004910 | GC48 | GAN CAO | 2osf_v | 0.9755 | CAH2_HUMAN  | CA2      |
| MOL004910 | GC48 | GAN CAO | 1rs0_v | 0.9483 | CFAB_HUMAN  | CFB      |
| MOL004910 | GC48 | GAN CAO | 2brb_v | 0.9991 | CHK1_HUMAN  | CHEK1    |
| MOL004910 | GC48 | GAN CAO | 1p0i_v | 0.9597 | CHLE_HUMAN  | BCHE     |
| MOL004910 | GC48 | GAN CAO | 2vwu_v | 0.9258 | EPHB4_HUMAN | EPHB4    |
| MOL004910 | GC48 | GAN CAO | 1qku_v | 0.952  | ESR1_HUMAN  | ESR1     |
| MOL004910 | GC48 | GAN CAO | 1l6k_v | 0.9396 | GSTP1_HUMAN | GSTP1    |
| MOL004910 | GC48 | GAN CAO | 2hck_v | 0.9943 | HCK_HUMAN   | HCK      |
| MOL004910 | GC48 | GAN CAO | 2pg2_v | 0.9485 | KIF11_HUMAN | KIF11    |
| MOL004910 | GC48 | GAN CAO | 1pme_v | 0.9478 | MK01_HUMAN  | MAPK1    |
| MOL004910 | GC48 | GAN CAO | 1eub_v | 0.9978 | MMP13_HUMAN | MMP13    |
| MOL004910 | GC48 | GAN CAO | 2obj_v | 0.9568 | P11309      | PIM1     |
| MOL004910 | GC48 | GAN CAO | 3eqm_v | 0.9291 | P11511      | CYP19A1  |
| MOL004910 | GC48 | GAN CAO | 1w8l_v | 0.9218 | P62937      | PPIA     |
| MOL004910 | GC48 | GAN CAO | 1p49_v | 0.9424 | STS_HUMAN   | STS      |
| MOL004910 | GC48 | GAN CAO | 1dvz_v | 0.9754 | TTHY_HUMAN  | TTR      |
| MOL004911 | GC49 | GAN CAO | 1j96_v | 0.9493 | AK1C2_HUMAN | AKR1C2   |
| MOL004911 | GC49 | GAN CAO | 1xf0_v | 0.9923 | AK1C3_HUMAN | AKR1C3   |
| MOL004911 | GC49 | GAN CAO | 1e7e_v | 0.9558 | ALBU_HUMAN  | ALB      |
| MOL004911 | GC49 | GAN CAO | 1x97_v | 0.9211 | ALDR_HUMAN  | AKR1B1   |
| MOL004911 | GC49 | GAN CAO | 1l6l_v | 0.9616 | APOA2_HUMAN | APOA2    |
| MOL004911 | GC49 | GAN CAO | 2ohp_v | 0.9854 | BACE1_HUMAN | BACE1    |
| MOL004911 | GC49 | GAN CAO | 1if4_v | 0.9477 | CAH2_HUMAN  | CA2      |
| MOL004911 | GC49 | GAN CAO | 1gfw_v | 0.9241 | CASP3_HUMAN | CASP3    |
| MOL004911 | GC49 | GAN CAO | 1shj_v | 0.9192 | CASP7_HUMAN | CASP7    |
| MOL004911 | GC49 | GAN CAO | 2brg_v | 0.9656 | CHK1_HUMAN  | CHEK1    |
| MOL004911 | GC49 | GAN CAO | 2j5f_v | 0.9202 | EGFR_HUMAN  | EGFR     |
| MOL004911 | GC49 | GAN CAO | 2vwu_v | 0.9903 | EPHB4_HUMAN | EPHB4    |
| MOL004911 | GC49 | GAN CAO | 2i0j_v | 0.9898 | ESR1_HUMAN  | ESR1     |
| MOL004911 | GC49 | GAN CAO | 1qkm_v | 0.9878 | ESR2_HUMAN  | ESR2     |
| MOL004911 | GC49 | GAN CAO | 1ya8_v | 0.9538 | EST1_HUMAN  | CES1     |
| MOL004911 | GC49 | GAN CAO | 2pg2_v | 0.9859 | KIF11_HUMAN | KIF11    |
| MOL004911 | GC49 | GAN CAO | 1pme_v | 0.9983 | MK01_HUMAN  | MAPK1    |
| MOL004911 | GC49 | GAN CAO | 1eub_v | 0.9855 | MMP13_HUMAN | MMP13    |
| MOL004911 | GC49 | GAN CAO | 2pin_v | 0.9028 | P10828      | THRB     |
| MOL004911 | GC49 | GAN CAO | 2p3g_v | 0.9262 | P49137      | 1APKAPK2 |
| MOL004911 | GC49 | GAN CAO | 1yxx_v | 0.9743 | PIM1_HUMAN  | PIM1     |

|           |      |         |        |        |             |          |
|-----------|------|---------|--------|--------|-------------|----------|
| MOL004911 | GC49 | GAN CAO | 1v3q_v | 0.9403 | PNPH_HUMAN  | PNP      |
| MOL004911 | GC49 | GAN CAO | 1q8m_v | 0.9804 | Q9NP99      | TREM1    |
| MOL004911 | GC49 | GAN CAO | 1p49_v | 0.9528 | STS_HUMAN   | STS      |
| MOL000354 | GC5  | GAN CAO | 1bzm_v | 0.911  | CAH1_HUMAN  | CA1      |
| MOL000354 | GC5  | GAN CAO | 1p0i_v | 0.9556 | CHLE_HUMAN  | BCHE     |
| MOL000354 | GC5  | GAN CAO | 2itx_v | 0.9434 | EGFR_HUMAN  | EGFR     |
| MOL000354 | GC5  | GAN CAO | 2ocf_v | 0.9583 | ESR1_HUMAN  | ESR1     |
| MOL000354 | GC5  | GAN CAO | 1ogs_v | 0.9655 | GLCM_HUMAN  | GBA      |
| MOL000354 | GC5  | GAN CAO | 2hck_v | 0.9907 | HCK_HUMAN   | HCK      |
| MOL000354 | GC5  | GAN CAO | 3fzh_v | 0.9424 | P11142      | HSPA8    |
| MOL000354 | GC5  | GAN CAO | 1zuc_v | 0.9093 | PRGR_HUMAN  | PGR      |
| MOL000354 | GC5  | GAN CAO | 1no9_v | 0.935  | THRB_HUMAN  | F2       |
| MOL000354 | GC5  | GAN CAO | 1dvz_v | 0.9195 | TTHY_HUMAN  | TTR      |
| MOL004912 | GC50 | GAN CAO | 1j96_v | 0.9708 | AK1C2_HUMAN | AKR1C2   |
| MOL004912 | GC50 | GAN CAO | 1xf0_v | 0.9538 | AK1C3_HUMAN | AKR1C3   |
| MOL004912 | GC50 | GAN CAO | 1xow_v | 0.9433 | ANDR_HUMAN  | AR       |
| MOL004912 | GC50 | GAN CAO | 2ohp_v | 0.9918 | BACE1_HUMAN | BACE1    |
| MOL004912 | GC50 | GAN CAO | 1reu_v | 0.9146 | BMP2_HUMAN  | BMP2     |
| MOL004912 | GC50 | GAN CAO | 1if4_v | 0.9646 | CAH2_HUMAN  | CA2      |
| MOL004912 | GC50 | GAN CAO | 1shj_v | 0.9623 | CASP7_HUMAN | CASP7    |
| MOL004912 | GC50 | GAN CAO | 1gwq_v | 0.926  | ESR1_HUMAN  | ESR1     |
| MOL004912 | GC50 | GAN CAO | 1qkm_v | 0.9339 | ESR2_HUMAN  | ESR2     |
| MOL004912 | GC50 | GAN CAO | 1ya8_v | 0.9017 | EST1_HUMAN  | CES1     |
| MOL004912 | GC50 | GAN CAO | 2p3g_v | 0.952  | P49137      | MAPKAPK2 |
| MOL004912 | GC50 | GAN CAO | 1w8l_v | 0.9158 | P62937      | PPIA     |
| MOL004912 | GC50 | GAN CAO | 2a4z_v | 0.9553 | PK3CG_HUMAN | PIK3CG   |
| MOL004912 | GC50 | GAN CAO | 1w7h_v | 0.9834 | Q16539      | MAPK14   |
| MOL004913 | GC51 | GAN CAO | 1kwq_v | 0.9168 | CAH2_HUMAN  | CA2      |
| MOL004913 | GC51 | GAN CAO | 1p0i_v | 0.9105 | CHLE_HUMAN  | BCHE     |
| MOL004913 | GC51 | GAN CAO | 1qku_v | 0.9201 | ESR1_HUMAN  | ESR1     |
| MOL004913 | GC51 | GAN CAO | 1ya8_v | 0.9486 | EST1_HUMAN  | CES1     |
| MOL004913 | GC51 | GAN CAO | 1pmv_v | 0.9449 | MK10_HUMAN  | MAPK10   |
| MOL004913 | GC51 | GAN CAO | 1yxx_v | 0.944  | PIM1_HUMAN  | PIM1     |
| MOL004913 | GC51 | GAN CAO | 1w7h_v | 0.9551 | Q16539      | MAPK14   |
| MOL004913 | GC51 | GAN CAO | 1no9_v | 0.9672 | THRB_HUMAN  | F2       |
| MOL004914 | GC52 | GAN CAO | 1e7e_v | 0.9073 | ALBU_HUMAN  | ALB      |
| MOL004914 | GC52 | GAN CAO | 2q7j_v | 0.9178 | ANDR_HUMAN  | AR       |
| MOL004914 | GC52 | GAN CAO | 116l_v | 0.921  | APOA2_HUMAN | APOA2    |
| MOL004914 | GC52 | GAN CAO | 1reu_v | 1      | BMP2_HUMAN  | BMP2     |
| MOL004914 | GC52 | GAN CAO | 1okl_v | 0.9867 | CAH2_HUMAN  | CA2      |
| MOL004914 | GC52 | GAN CAO | 2uzd_v | 0.926  | CCNA2_HUMAN | CCNA2    |
| MOL004914 | GC52 | GAN CAO | 1p0i_v | 0.9583 | CHLE_HUMAN  | BCHE     |

|           |      |         |        |        |             |          |
|-----------|------|---------|--------|--------|-------------|----------|
| MOL004914 | GC52 | GAN CAO | 1tg6_v | 0.9133 | CLPP_HUMAN  | CLPP     |
| MOL004914 | GC52 | GAN CAO | 2ocf_v | 0.973  | ESR1_HUMAN  | ESR1     |
| MOL004914 | GC52 | GAN CAO | 1ya8_v | 0.9161 | EST1_HUMAN  | CES1     |
| MOL004914 | GC52 | GAN CAO | 1md3_v | 0.9082 | GSTP1_HUMAN | GSTP1    |
| MOL004914 | GC52 | GAN CAO | 1uki_v | 0.9285 | MK08_HUMAN  | MAPK8    |
| MOL004914 | GC52 | GAN CAO | 1pmv_v | 0.9462 | MK10_HUMAN  | MAPK10   |
| MOL004914 | GC52 | GAN CAO | 3eqm_v | 0.9545 | P11511      | CYP19A1  |
| MOL004914 | GC52 | GAN CAO | 2vth_v | 0.9464 | P24941      | CDK2     |
| MOL004914 | GC52 | GAN CAO | 1yxx_v | 0.9022 | PIM1_HUMAN  | PIM1     |
| MOL004914 | GC52 | GAN CAO | 1v3q_v | 0.9477 | PNPH_HUMAN  | PNP      |
| MOL004914 | GC52 | GAN CAO | 1wbw_v | 0.9153 | Q16539      | MAPK14   |
| MOL004914 | GC52 | GAN CAO | 1q8m_v | 0.9648 | Q9NP99      | TREM1    |
| MOL004914 | GC52 | GAN CAO | 1p49_v | 0.9268 | STS_HUMAN   | STS      |
| MOL004914 | GC52 | GAN CAO | 1no9_v | 0.9705 | THRB_HUMAN  | F2       |
| MOL004915 | GC53 | GAN CAO | 1t63_v | 0.9621 | ANDR_HUMAN  | AR       |
| MOL004915 | GC53 | GAN CAO | 1oq5_v | 0.9595 | CAH2_HUMAN  | CA2      |
| MOL004915 | GC53 | GAN CAO | 1gfw_v | 0.9123 | CASP3_HUMAN | CASP3    |
| MOL004915 | GC53 | GAN CAO | 1rs0_v | 0.9197 | CFAB_HUMAN  | CFB      |
| MOL004915 | GC53 | GAN CAO | 1x7r_v | 0.9827 | ESR1_HUMAN  | ESR1     |
| MOL004915 | GC53 | GAN CAO | 1qkm_v | 0.977  | ESR2_HUMAN  | ESR2     |
| MOL004915 | GC53 | GAN CAO | 1ya8_v | 0.9662 | EST1_HUMAN  | CES1     |
| MOL004915 | GC53 | GAN CAO | 1d7i_v | 0.9603 | FKB1A_HUMAN | FKBP1A   |
| MOL004915 | GC53 | GAN CAO | 2uyi_v | 0.9881 | KIF11_HUMAN | KIF11    |
| MOL004915 | GC53 | GAN CAO | 1pme_v | 0.9784 | MK01_HUMAN  | MAPK1    |
| MOL004915 | GC53 | GAN CAO | 1uki_v | 0.9556 | MK08_HUMAN  | MAPK8    |
| MOL004915 | GC53 | GAN CAO | 1pmv_v | 0.9636 | MK10_HUMAN  | MAPK10   |
| MOL004915 | GC53 | GAN CAO | 1pq9_v | 0.9824 | NR1H2_HUMAN | NR1H2    |
| MOL004915 | GC53 | GAN CAO | 1jvp_v | 0.9745 | P24941      | CDK2     |
| MOL004915 | GC53 | GAN CAO | 2jbp_v | 0.9949 | P49137      | 4APKAPK2 |
| MOL004915 | GC53 | GAN CAO | 1w8m_v | 0.9281 | P62937      | PPIA     |
| MOL004915 | GC53 | GAN CAO | 1xoz_v | 0.953  | PDE5A_HUMAN | PDE5A    |
| MOL004915 | GC53 | GAN CAO | 1yxx_v | 0.987  | PIM1_HUMAN  | PIM1     |
| MOL004915 | GC53 | GAN CAO | 1v3q_v | 0.9204 | PNPH_HUMAN  | PNP      |
| MOL004915 | GC53 | GAN CAO | 1w7h_v | 0.9977 | Q16539      | MAPK14   |
| MOL004915 | GC53 | GAN CAO | 1q8m_v | 0.9435 | Q9NP99      | TREM1    |
| MOL004915 | GC53 | GAN CAO | 1no9_v | 0.9547 | THRB_HUMAN  | F2       |
| MOL004915 | GC53 | GAN CAO | 1dvz_v | 0.9789 | TTHY_HUMAN  | TTR      |
| MOL004917 | GC54 | GAN CAO | 1bzm_v | 0.9607 | CAH1_HUMAN  | CA1      |
| MOL004917 | GC54 | GAN CAO | 1jd0_v | 0.9681 | CAH12_HUMAN | CA12     |
| MOL004917 | GC54 | GAN CAO | 1csb_v | 0.9345 | CATB_HUMAN  | CTSB     |
| MOL004917 | GC54 | GAN CAO | 1fh0_v | 0.9474 | CATL2_HUMAN | CTSV     |
| MOL004917 | GC54 | GAN CAO | 2f1g_v | 0.9269 | CATS_HUMAN  | CTSS     |



|           |      |         |        |        |             |          |
|-----------|------|---------|--------|--------|-------------|----------|
| MOL004917 | GC54 | GAN CAO | 1h1p_v | 0.9636 | CCNA2_HUMAN | CCNA2    |
| MOL004917 | GC54 | GAN CAO | 1x1w_v | 0.942  | CHLE_HUMAN  | BCHE     |
| MOL004917 | GC54 | GAN CAO | 1vec_v | 0.914  | DDX6_HUMAN  | DDX6     |
| MOL004917 | GC54 | GAN CAO | 2itx_v | 0.9752 | EGFR_HUMAN  | EGFR     |
| MOL004917 | GC54 | GAN CAO | 1qkm_v | 0.9917 | ESR2_HUMAN  | ESR2     |
| MOL004917 | GC54 | GAN CAO | 1d7i_v | 0.9169 | FKB1A_HUMAN | FKBP1A   |
| MOL004917 | GC54 | GAN CAO | 1ogs_v | 0.9555 | GLCM_HUMAN  | GBA      |
| MOL004917 | GC54 | GAN CAO | 1lbk_v | 0.9828 | GSTP1_HUMAN | GSTP1    |
| MOL004917 | GC54 | GAN CAO | 2hck_v | 0.9803 | HCK_HUMAN   | HCK      |
| MOL004917 | GC54 | GAN CAO | 1mfu_v | 0.9169 | P04745      | AMY1A    |
| MOL004917 | GC54 | GAN CAO | 3fzh_v | 0.9307 | P11142      | HSPA8    |
| MOL004917 | GC54 | GAN CAO | 2jbo_v | 0.9772 | P49137      | 4APKAPK2 |
| MOL004917 | GC54 | GAN CAO | 1xn0_v | 0.9352 | PDE4B_HUMAN | PDE4B    |
| MOL004917 | GC54 | GAN CAO | 1yxu_v | 0.962  | PIM1_HUMAN  | PIM1     |
| MOL004917 | GC54 | GAN CAO | 1v3q_v | 0.9439 | PNPH_HUMAN  | PNP      |
| MOL004917 | GC54 | GAN CAO | 1cb0_v | 0.9613 | Q13126      | MTAP     |
| MOL004917 | GC54 | GAN CAO | 1q33_v | 0.9651 | Q9BW91      | NUDT9    |
| MOL004917 | GC54 | GAN CAO | 1ozn_v | 0.9665 | RTN4R_HUMAN | RTN4R    |
| MOL004917 | GC54 | GAN CAO | 1z68_v | 0.9715 | SEPR_HUMAN  | FAP      |
| MOL004917 | GC54 | GAN CAO | 1m9z_v | 0.9585 | TGFR2_HUMAN | TGFBR2   |
| MOL004924 | GC55 | GAN CAO | 1e7e_v | 0.9779 | ALBU_HUMAN  | ALB      |
| MOL004924 | GC55 | GAN CAO | 2pir_v | 0.9502 | ANDR_HUMAN  | AR       |
| MOL004924 | GC55 | GAN CAO | 1l6l_v | 0.9893 | APOA2_HUMAN | APOA2    |
| MOL004924 | GC55 | GAN CAO | 1reu_v | 0.9768 | BMP2_HUMAN  | BMP2     |
| MOL004924 | GC55 | GAN CAO | 1jd0_v | 0.9192 | CAH12_HUMAN | CA12     |
| MOL004924 | GC55 | GAN CAO | 3dej_v | 0.9248 | CASP3_HUMAN | CASP3    |
| MOL004924 | GC55 | GAN CAO | 1x1w_v | 0.9188 | CHLE_HUMAN  | BCHE     |
| MOL004924 | GC55 | GAN CAO | 1vec_v | 0.9279 | DDX6_HUMAN  | DDX6     |
| MOL004924 | GC55 | GAN CAO | 2i0j_v | 0.9332 | ESR1_HUMAN  | ESR1     |
| MOL004924 | GC55 | GAN CAO | 1ogs_v | 0.9576 | GLCM_HUMAN  | GBA      |
| MOL004924 | GC55 | GAN CAO | 1lbk_v | 0.9531 | GSTP1_HUMAN | GSTP1    |
| MOL004924 | GC55 | GAN CAO | 3dcw_v | 0.9578 | P00918      | CA2      |
| MOL004924 | GC55 | GAN CAO | 2obj_v | 0.949  | P11309      | PIM1     |
| MOL004924 | GC55 | GAN CAO | 1v3q_v | 0.9067 | PNPH_HUMAN  | PNP      |
| MOL004924 | GC55 | GAN CAO | 1cb0_v | 0.9499 | Q13126      | MTAP     |
| MOL004924 | GC55 | GAN CAO | 1q33_v | 0.9561 | Q9BW91      | NUDT9    |
| MOL004924 | GC55 | GAN CAO | 1p49_v | 1      | STS_HUMAN   | STS      |
| MOL004924 | GC55 | GAN CAO | 1m9z_v | 0.958  | TGFR2_HUMAN | TGFBR2   |
| MOL004935 | GC56 | GAN CAO | 1j96_v | 0.9607 | AK1C2_HUMAN | AKR1C2   |
| MOL004935 | GC56 | GAN CAO | 1xf0_v | 0.926  | AK1C3_HUMAN | AKR1C3   |
| MOL004935 | GC56 | GAN CAO | 1e7e_v | 0.962  | ALBU_HUMAN  | ALB      |
| MOL004935 | GC56 | GAN CAO | 2agt_v | 0.9956 | ALDR_HUMAN  | AKR1B1   |

|           |      |         |        |        |             |          |
|-----------|------|---------|--------|--------|-------------|----------|
| MOL004935 | GC56 | GAN CAO | 2pit_v | 0.918  | ANDR_HUMAN  | AR       |
| MOL004935 | GC56 | GAN CAO | 1oj9_v | 0.9493 | AOFB_HUMAN  | MAOB     |
| MOL004935 | GC56 | GAN CAO | 1l6l_v | 0.9623 | APOA2_HUMAN | APOA2    |
| MOL004935 | GC56 | GAN CAO | 2ohp_v | 0.9115 | BACE1_HUMAN | BACE1    |
| MOL004935 | GC56 | GAN CAO | 1reu_v | 0.9799 | BMP2_HUMAN  | BMP2     |
| MOL004935 | GC56 | GAN CAO | 1if4_v | 0.992  | CAH2_HUMAN  | CA2      |
| MOL004935 | GC56 | GAN CAO | 1gfw_v | 0.9264 | CASP3_HUMAN | CASP3    |
| MOL004935 | GC56 | GAN CAO | 1shj_v | 0.9766 | CASP7_HUMAN | CASP7    |
| MOL004935 | GC56 | GAN CAO | 1lyw_v | 0.963  | CATD_HUMAN  | CTSD     |
| MOL004935 | GC56 | GAN CAO | 2flg_v | 0.9726 | CATS_HUMAN  | CTSS     |
| MOL004935 | GC56 | GAN CAO | 1rs0_v | 0.9696 | CFAB_HUMAN  | CFB      |
| MOL004935 | GC56 | GAN CAO | 1p0i_v | 0.9618 | CHLE_HUMAN  | BCHE     |
| MOL004935 | GC56 | GAN CAO | 2vwu_v | 0.94   | EPHB4_HUMAN | EPHB4    |
| MOL004935 | GC56 | GAN CAO | 2ocf_v | 0.9751 | ESR1_HUMAN  | ESR1     |
| MOL004935 | GC56 | GAN CAO | 1ya8_v | 0.9905 | EST1_HUMAN  | CES1     |
| MOL004935 | GC56 | GAN CAO | 1ogs_v | 0.9658 | GLCM_HUMAN  | GBA      |
| MOL004935 | GC56 | GAN CAO | 2hck_v | 0.9906 | HCK_HUMAN   | HCK      |
| MOL004935 | GC56 | GAN CAO | 2uyi_v | 0.9621 | KIF11_HUMAN | KIF11    |
| MOL004935 | GC56 | GAN CAO | 1glq_v | 0.9396 | LYAM3_HUMAN | SELP     |
| MOL004935 | GC56 | GAN CAO | 1pme_v | 0.9992 | MK01_HUMAN  | MAPK1    |
| MOL004935 | GC56 | GAN CAO | 1uki_v | 0.9819 | MK08_HUMAN  | MAPK8    |
| MOL004935 | GC56 | GAN CAO | 3cgf_v | 0.9913 | MK10_HUMAN  | MAPK10   |
| MOL004935 | GC56 | GAN CAO | 1eub_v | 0.9023 | MMP13_HUMAN | MMP13    |
| MOL004935 | GC56 | GAN CAO | 1bm6_v | 0.9782 | MMP3_HUMAN  | MMP3     |
| MOL004935 | GC56 | GAN CAO | 1pq9_v | 0.9292 | NR1H2_HUMAN | NR1H2    |
| MOL004935 | GC56 | GAN CAO | 1xan_v | 0.9394 | P00390      | GSR      |
| MOL004935 | GC56 | GAN CAO | 3bgp_v | 0.9953 | P11309      | PIM1     |
| MOL004935 | GC56 | GAN CAO | 3eqm_v | 0.9264 | P11511      | CYP19A1  |
| MOL004935 | GC56 | GAN CAO | 1jvp_v | 0.9532 | P24941      | CDK2     |
| MOL004935 | GC56 | GAN CAO | 3cjf_v | 0.9913 | P35968      | KDR      |
| MOL004935 | GC56 | GAN CAO | 2jbp_v | 0.9908 | P49137      | MAPKAPK2 |
| MOL004935 | GC56 | GAN CAO | 1w8l_v | 0.9788 | P62937      | PPIA     |
| MOL004935 | GC56 | GAN CAO | 1xoz_v | 0.9487 | PDE5A_HUMAN | PDE5A    |
| MOL004935 | GC56 | GAN CAO | 1zgy_v | 0.9549 | PPARG_HUMAN | PPARG    |
| MOL004935 | GC56 | GAN CAO | 2ovm_v | 0.9592 | PRGR_HUMAN  | PGR      |
| MOL004935 | GC56 | GAN CAO | 1w7h_v | 0.9393 | Q16539      | MAPK14   |
| MOL004935 | GC56 | GAN CAO | 1nub_v | 0.9479 | SPRC_HUMAN  | SPARC    |
| MOL004935 | GC56 | GAN CAO | 1p49_v | 0.9646 | STS_HUMAN   | STS      |
| MOL004935 | GC56 | GAN CAO | 1no9_v | 0.9958 | THRB_HUMAN  | F2       |
| MOL004935 | GC56 | GAN CAO | 2roy_v | 0.9823 | TTHY_HUMAN  | TTR      |
| MOL004941 | GC57 | GAN CAO | 1uki_v | 0.9134 | MK08_HUMAN  | MAPK8    |
| MOL004941 | GC57 | GAN CAO | 1pmv_v | 0.9276 | MK10_HUMAN  | MAPK10   |

|           |      |         |        |        |             |        |
|-----------|------|---------|--------|--------|-------------|--------|
| MOL004941 | GC57 | GAN CAO | 1no9_v | 0.9636 | THRB_HUMAN  | F2     |
| MOL004945 | GC58 | GAN CAO | 1e7e_v | 0.9388 | ALBU_HUMAN  | ALB    |
| MOL004945 | GC58 | GAN CAO | 1xow_v | 0.9122 | ANDR_HUMAN  | AR     |
| MOL004945 | GC58 | GAN CAO | 1l6l_v | 0.9149 | APOA2_HUMAN | APOA2  |
| MOL004945 | GC58 | GAN CAO | 2ohp_v | 0.9869 | BACE1_HUMAN | BACE1  |
| MOL004945 | GC58 | GAN CAO | 1if4_v | 0.9475 | CAH2_HUMAN  | CA2    |
| MOL004945 | GC58 | GAN CAO | 1rs0_v | 0.9722 | CFAB_HUMAN  | CFB    |
| MOL004945 | GC58 | GAN CAO | 2br1_v | 0.9922 | CHK1_HUMAN  | CHEK1  |
| MOL004945 | GC58 | GAN CAO | 1qku_v | 0.9493 | ESR1_HUMAN  | ESR1   |
| MOL004945 | GC58 | GAN CAO | 1ya8_v | 0.9766 | EST1_HUMAN  | CES1   |
| MOL004945 | GC58 | GAN CAO | 2pg2_v | 0.9706 | KIF11_HUMAN | KIF11  |
| MOL004945 | GC58 | GAN CAO | 1pme_v | 0.9313 | MK01_HUMAN  | MAPK1  |
| MOL004945 | GC58 | GAN CAO | 1uki_v | 0.9682 | MK08_HUMAN  | MAPK8  |
| MOL004945 | GC58 | GAN CAO | 1pmv_v | 0.9787 | MK10_HUMAN  | MAPK10 |
| MOL004945 | GC58 | GAN CAO | 1eub_v | 0.9816 | MMP13_HUMAN | MMP13  |
| MOL004945 | GC58 | GAN CAO | 2obj_v | 0.9559 | P11309      | PIM1   |
| MOL004945 | GC58 | GAN CAO | 2a4z_v | 0.9405 | PK3CG_HUMAN | PIK3CG |
| MOL004945 | GC58 | GAN CAO | 1w7h_v | 0.9928 | Q16539      | MAPK14 |
| MOL004945 | GC58 | GAN CAO | 1p49_v | 0.9357 | STS_HUMAN   | STS    |
| MOL004945 | GC58 | GAN CAO | 1f86_v | 0.9991 | TTHY_HUMAN  | TTR    |
| MOL004948 | GC59 | GAN CAO | 1j96_v | 0.9485 | AK1C2_HUMAN | AKR1C2 |
| MOL004948 | GC59 | GAN CAO | 1e7a_v | 1      | ALBU_HUMAN  | ALB    |
| MOL004948 | GC59 | GAN CAO | 2pio_v | 0.9793 | ANDR_HUMAN  | AR     |
| MOL004948 | GC59 | GAN CAO | 1reu_v | 0.9707 | BMP2_HUMAN  | BMP2   |
| MOL004948 | GC59 | GAN CAO | 1shj_v | 1      | CASP7_HUMAN | CASP7  |
| MOL004948 | GC59 | GAN CAO | 2vwu_v | 0.922  | EPHB4_HUMAN | EPHB4  |
| MOL004948 | GC59 | GAN CAO | 1qkm_v | 0.9707 | ESR2_HUMAN  | ESR2   |
| MOL004948 | GC59 | GAN CAO | 1uki_v | 0.9492 | MK08_HUMAN  | MAPK8  |
| MOL004948 | GC59 | GAN CAO | 1pmv_v | 0.9856 | MK10_HUMAN  | MAPK10 |
| MOL004948 | GC59 | GAN CAO | 1bm6_v | 0.9025 | MMP3_HUMAN  | MMP3   |
| MOL004948 | GC59 | GAN CAO | 2o65_v | 0.93   | PIM1_HUMAN  | PIM1   |
| MOL004948 | GC59 | GAN CAO | 1zyj_v | 0.9291 | Q16539      | MAPK14 |
| MOL003656 | GC6  | GAN CAO | 1j96_v | 0.9551 | AK1C2_HUMAN | AKR1C2 |
| MOL003656 | GC6  | GAN CAO | 2pir_v | 0.9709 | ANDR_HUMAN  | AR     |
| MOL003656 | GC6  | GAN CAO | 1l6l_v | 0.9385 | APOA2_HUMAN | APOA2  |
| MOL003656 | GC6  | GAN CAO | 2ohp_v | 0.9242 | BACE1_HUMAN | BACE1  |
| MOL003656 | GC6  | GAN CAO | 1reu_v | 0.9723 | BMP2_HUMAN  | BMP2   |
| MOL003656 | GC6  | GAN CAO | 1if4_v | 0.9813 | CAH2_HUMAN  | CA2    |
| MOL003656 | GC6  | GAN CAO | 1shj_v | 0.9411 | CASP7_HUMAN | CASP7  |
| MOL003656 | GC6  | GAN CAO | 1rs0_v | 0.9203 | CFAB_HUMAN  | CFB    |
| MOL003656 | GC6  | GAN CAO | 1p0i_v | 0.9633 | CHLE_HUMAN  | BCHE   |
| MOL003656 | GC6  | GAN CAO | 1x7r_v | 0.9826 | ESR1_HUMAN  | ESR1   |

|           |      |         |        |        |             |          |
|-----------|------|---------|--------|--------|-------------|----------|
| MOL003656 | GC6  | GAN CAO | 1qkm_v | 0.9868 | ESR2_HUMAN  | ESR2     |
| MOL003656 | GC6  | GAN CAO | 1lbk_v | 0.945  | GSTP1_HUMAN | GSTP1    |
| MOL003656 | GC6  | GAN CAO | 2fky_v | 0.9246 | KIF11_HUMAN | KIF11    |
| MOL003656 | GC6  | GAN CAO | 2obj_v | 0.9658 | P11309      | PIM1     |
| MOL003656 | GC6  | GAN CAO | 1w8l_v | 0.9253 | P62937      | PPIA     |
| MOL003656 | GC6  | GAN CAO | 2a4z_v | 0.9792 | PK3CG_HUMAN | PIK3CG   |
| MOL003656 | GC6  | GAN CAO | 1p49_v | 0.9417 | STS_HUMAN   | STS      |
| MOL003656 | GC6  | GAN CAO | 1dvz_v | 0.9857 | TTHY_HUMAN  | TTR      |
| MOL004949 | GC60 | GAN CAO | 1e7e_v | 0.9615 | ALBU_HUMAN  | ALB      |
| MOL004949 | GC60 | GAN CAO | 1l6l_v | 0.9749 | APOA2_HUMAN | APOA2    |
| MOL004949 | GC60 | GAN CAO | 2ohp_v | 0.9414 | BACE1_HUMAN | BACE1    |
| MOL004949 | GC60 | GAN CAO | 1if4_v | 0.9792 | CAH2_HUMAN  | CA2      |
| MOL004949 | GC60 | GAN CAO | 3dej_v | 0.9906 | CASP3_HUMAN | CASP3    |
| MOL004949 | GC60 | GAN CAO | 1shj_v | 0.9826 | CASP7_HUMAN | CASP7    |
| MOL004949 | GC60 | GAN CAO | 1fh0_v | 0.9267 | CATL2_HUMAN | CTSV     |
| MOL004949 | GC60 | GAN CAO | 1vyw_v | 0.954  | CCNA2_HUMAN | CCNA2    |
| MOL004949 | GC60 | GAN CAO | 1xo2_v | 0.9264 | CDK6_HUMAN  | CDK6     |
| MOL004949 | GC60 | GAN CAO | 1rs0_v | 0.9944 | CFAB_HUMAN  | CFB      |
| MOL004949 | GC60 | GAN CAO | 1xlu_v | 0.9694 | CHLE_HUMAN  | BCHE     |
| MOL004949 | GC60 | GAN CAO | 2itx_v | 0.9361 | EGFR_HUMAN  | EGFR     |
| MOL004949 | GC60 | GAN CAO | 2pog_v | 0.9721 | ESR1_HUMAN  | ESR1     |
| MOL004949 | GC60 | GAN CAO | 1ya8_v | 0.9001 | EST1_HUMAN  | CES1     |
| MOL004949 | GC60 | GAN CAO | 1ogs_v | 0.9716 | GLCM_HUMAN  | GBA      |
| MOL004949 | GC60 | GAN CAO | 2hck_v | 0.9928 | HCK_HUMAN   | HCK      |
| MOL004949 | GC60 | GAN CAO | 1uki_v | 0.9533 | MK08_HUMAN  | MAPK8    |
| MOL004949 | GC60 | GAN CAO | 3cgf_v | 0.9673 | MK10_HUMAN  | MAPK10   |
| MOL004949 | GC60 | GAN CAO | 1eub_v | 0.9137 | MMP13_HUMAN | MMP13    |
| MOL004949 | GC60 | GAN CAO | 1bm6_v | 0.9508 | MMP3_HUMAN  | MMP3     |
| MOL004949 | GC60 | GAN CAO | 3fzm_v | 0.9058 | P11142      | HSPA8    |
| MOL004949 | GC60 | GAN CAO | 2obj_v | 0.9879 | P11309      | PIM1     |
| MOL004949 | GC60 | GAN CAO | 3cjf_v | 0.9674 | P35968      | KDR      |
| MOL004949 | GC60 | GAN CAO | 2jbp_v | 0.9787 | P49137      | 1APKAPK2 |
| MOL004949 | GC60 | GAN CAO | 1w8l_v | 0.9544 | P62937      | PPIA     |
| MOL004949 | GC60 | GAN CAO | 2ovm_v | 0.9149 | PRGR_HUMAN  | PGR      |
| MOL004949 | GC60 | GAN CAO | 1wbo_v | 0.9985 | Q16539      | MAPK14   |
| MOL004949 | GC60 | GAN CAO | 1p49_v | 0.9768 | STS_HUMAN   | STS      |
| MOL004949 | GC60 | GAN CAO | 1no9_v | 0.94   | THRB_HUMAN  | F2       |
| MOL004949 | GC60 | GAN CAO | 1dvz_v | 0.956  | TTHY_HUMAN  | TTR      |
| MOL004957 | GC61 | GAN CAO | 2i0j_v | 0.9928 | ESR1_HUMAN  | ESR1     |
| MOL004957 | GC61 | GAN CAO | 1x7j_v | 0.9865 | ESR2_HUMAN  | ESR2     |
| MOL004957 | GC61 | GAN CAO | 1yxx_v | 0.993  | PIM1_HUMAN  | PIM1     |
| MOL004959 | GC62 | GAN CAO | 1j96_v | 1      | AK1C2_HUMAN | AKR1C2   |

|           |      |         |        |        |             |          |
|-----------|------|---------|--------|--------|-------------|----------|
| MOL004959 | GC62 | GAN CAO | 1e7e_v | 0.9635 | ALBU_HUMAN  | ALB      |
| MOL004959 | GC62 | GAN CAO | 2agt_v | 0.9338 | ALDR_HUMAN  | AKR1B1   |
| MOL004959 | GC62 | GAN CAO | 2pio_v | 0.9948 | ANDR_HUMAN  | AR       |
| MOL004959 | GC62 | GAN CAO | 1l6l_v | 0.9107 | APOA2_HUMAN | APOA2    |
| MOL004959 | GC62 | GAN CAO | 1reu_v | 0.9575 | BMP2_HUMAN  | BMP2     |
| MOL004959 | GC62 | GAN CAO | 1zfq_v | 0.976  | CAH2_HUMAN  | CA2      |
| MOL004959 | GC62 | GAN CAO | 1shj_v | 0.9358 | CASP7_HUMAN | CASP7    |
| MOL004959 | GC62 | GAN CAO | 1rs0_v | 0.988  | CFAB_HUMAN  | CFB      |
| MOL004959 | GC62 | GAN CAO | 2brg_v | 0.9367 | CHK1_HUMAN  | CHEK1    |
| MOL004959 | GC62 | GAN CAO | 2ocf_v | 0.9241 | ESR1_HUMAN  | ESR1     |
| MOL004959 | GC62 | GAN CAO | 1ya8_v | 0.9059 | EST1_HUMAN  | CES1     |
| MOL004959 | GC62 | GAN CAO | 1d7i_v | 0.9284 | FKB1A_HUMAN | FKBP1A   |
| MOL004959 | GC62 | GAN CAO | 2pg2_v | 1      | KIF11_HUMAN | KIF11    |
| MOL004959 | GC62 | GAN CAO | 1pme_v | 0.9705 | MK01_HUMAN  | MAPK1    |
| MOL004959 | GC62 | GAN CAO | 1uki_v | 0.9588 | MK08_HUMAN  | MAPK8    |
| MOL004959 | GC62 | GAN CAO | 1pmv_v | 0.9635 | MK10_HUMAN  | MAPK10   |
| MOL004959 | GC62 | GAN CAO | 1eub_v | 0.9235 | MMP13_HUMAN | MMP13    |
| MOL004959 | GC62 | GAN CAO | 1bm6_v | 0.9695 | MMP3_HUMAN  | MMP3     |
| MOL004959 | GC62 | GAN CAO | 1pq9_v | 0.9166 | NR1H2_HUMAN | NR1H2    |
| MOL004959 | GC62 | GAN CAO | 1le6_v | 0.9326 | O15496      | PLA2G10  |
| MOL004959 | GC62 | GAN CAO | 2pin_v | 1      | P10828      | THRB     |
| MOL004959 | GC62 | GAN CAO | 3gam_v | 0.933  | P16083      | NQO2     |
| MOL004959 | GC62 | GAN CAO | 2p3g_v | 1      | P49137      | 1APKAPK2 |
| MOL004959 | GC62 | GAN CAO | 3exo_v | 0.9636 | P56817      | BACE1    |
| MOL004959 | GC62 | GAN CAO | 1w8l_v | 0.9768 | P62937      | PPIA     |
| MOL004959 | GC62 | GAN CAO | 2o65_v | 0.9934 | PIM1_HUMAN  | PIM1     |
| MOL004959 | GC62 | GAN CAO | 1v3q_v | 0.9015 | PNPH_HUMAN  | PNP      |
| MOL004959 | GC62 | GAN CAO | 1wbo_v | 0.9933 | Q16539      | MAPK14   |
| MOL004959 | GC62 | GAN CAO | 1p49_v | 0.9775 | STS_HUMAN   | STS      |
| MOL004959 | GC62 | GAN CAO | 1no9_v | 0.9594 | THRB_HUMAN  | F2       |
| MOL004959 | GC62 | GAN CAO | 1dvz_v | 0.9512 | TTHY_HUMAN  | TTR      |
| MOL004959 | GC62 | GAN CAO | 1j78_v | 0.967  | VTDB_HUMAN  | GC       |
| MOL004961 | GC63 | GAN CAO | 2osf_v | 0.9711 | CAH2_HUMAN  | CA2      |
| MOL004961 | GC63 | GAN CAO | 1xo2_v | 0.9068 | CDK6_HUMAN  | CDK6     |
| MOL004961 | GC63 | GAN CAO | 1rs0_v | 0.9088 | CFAB_HUMAN  | CFB      |
| MOL004961 | GC63 | GAN CAO | 1p0i_v | 0.9483 | CHLE_HUMAN  | BCHE     |
| MOL004961 | GC63 | GAN CAO | 2pog_v | 0.9598 | ESR1_HUMAN  | ESR1     |
| MOL004961 | GC63 | GAN CAO | 1ya8_v | 0.9014 | EST1_HUMAN  | CES1     |
| MOL004961 | GC63 | GAN CAO | 1ogs_v | 0.9687 | GLCM_HUMAN  | GBA      |
| MOL004961 | GC63 | GAN CAO | 2hck_v | 0.9898 | HCK_HUMAN   | HCK      |
| MOL004961 | GC63 | GAN CAO | 3fzh_v | 0.9475 | P11142      | HSPA8    |
| MOL004961 | GC63 | GAN CAO | 1w8m_v | 0.9021 | P62937      | PPIA     |

|           |      |         |        |        |             |          |
|-----------|------|---------|--------|--------|-------------|----------|
| MOL004961 | GC63 | GAN CAO | 1yxx_v | 0.9434 | PIM1_HUMAN  | PIM1     |
| MOL004961 | GC63 | GAN CAO | 1zuc_v | 0.9307 | PRGR_HUMAN  | PGR      |
| MOL004961 | GC63 | GAN CAO | 1no9_v | 0.9421 | THRB_HUMAN  | F2       |
| MOL004961 | GC63 | GAN CAO | 1dvz_v | 0.92   | TTHY_HUMAN  | TTR      |
| MOL004966 | GC64 | GAN CAO | 1j96_v | 0.9606 | AK1C2_HUMAN | AKR1C2   |
| MOL004966 | GC64 | GAN CAO | 1e7a_v | 0.9167 | ALBU_HUMAN  | ALB      |
| MOL004966 | GC64 | GAN CAO | 2ama_v | 0.9806 | ANDR_HUMAN  | AR       |
| MOL004966 | GC64 | GAN CAO | 2ohp_v | 0.9625 | BACE1_HUMAN | BACE1    |
| MOL004966 | GC64 | GAN CAO | 1reu_v | 0.9641 | BMP2_HUMAN  | BMP2     |
| MOL004966 | GC64 | GAN CAO | 1if4_v | 0.9876 | CAH2_HUMAN  | CA2      |
| MOL004966 | GC64 | GAN CAO | 1shj_v | 0.9357 | CASP7_HUMAN | CASP7    |
| MOL004966 | GC64 | GAN CAO | 1qku_v | 0.9152 | ESR1_HUMAN  | ESR1     |
| MOL004966 | GC64 | GAN CAO | 1ya8_v | 0.9558 | EST1_HUMAN  | CES1     |
| MOL004966 | GC64 | GAN CAO | 1md3_v | 0.9498 | GSTP1_HUMAN | GSTP1    |
| MOL004966 | GC64 | GAN CAO | 2pin_v | 0.9449 | P10828      | THRB     |
| MOL004966 | GC64 | GAN CAO | 3bgp_v | 0.9331 | P11309      | PIM1     |
| MOL004966 | GC64 | GAN CAO | 2jbo_v | 0.9368 | P49137      | MAPKAPK2 |
| MOL004966 | GC64 | GAN CAO | 2ovm_v | 0.9292 | PRGR_HUMAN  | PGR      |
| MOL004974 | GC65 | GAN CAO | 1j96_v | 0.963  | AK1C2_HUMAN | AKR1C2   |
| MOL004974 | GC65 | GAN CAO | 1e7e_v | 0.9705 | ALBU_HUMAN  | ALB      |
| MOL004974 | GC65 | GAN CAO | 2q7j_v | 0.9192 | ANDR_HUMAN  | AR       |
| MOL004974 | GC65 | GAN CAO | 2v61_v | 0.9031 | AOFB_HUMAN  | MAOB     |
| MOL004974 | GC65 | GAN CAO | 1l6l_v | 0.9707 | APOA2_HUMAN | APOA2    |
| MOL004974 | GC65 | GAN CAO | 2ohp_v | 0.9314 | BACE1_HUMAN | BACE1    |
| MOL004974 | GC65 | GAN CAO | 1reu_v | 0.9629 | BMP2_HUMAN  | BMP2     |
| MOL004974 | GC65 | GAN CAO | 2itx_v | 0.9171 | EGFR_HUMAN  | EGFR     |
| MOL004974 | GC65 | GAN CAO | 1qkm_v | 0.9445 | ESR2_HUMAN  | ESR2     |
| MOL004974 | GC65 | GAN CAO | 1ya8_v | 0.9348 | EST1_HUMAN  | CES1     |
| MOL004974 | GC65 | GAN CAO | 1l6k_v | 0.98   | GSTP1_HUMAN | GSTP1    |
| MOL004974 | GC65 | GAN CAO | 3dcw_v | 0.958  | P00918      | CA2      |
| MOL004974 | GC65 | GAN CAO | 2p3g_v | 0.9082 | P49137      | MAPKAPK2 |
| MOL004974 | GC65 | GAN CAO | 2o65_v | 0.9212 | PIM1_HUMAN  | PIM1     |
| MOL004974 | GC65 | GAN CAO | 2a4z_v | 0.9729 | PK3CG_HUMAN | PIK3CG   |
| MOL004974 | GC65 | GAN CAO | 2qd9_v | 0.9473 | Q16539      | MAPK14   |
| MOL004974 | GC65 | GAN CAO | 1q8m_v | 0.9339 | Q9NP99      | TREM1    |
| MOL004974 | GC65 | GAN CAO | 1p49_v | 0.9777 | STS_HUMAN   | STS      |
| MOL004978 | GC66 | GAN CAO | 1j96_v | 0.9627 | AK1C2_HUMAN | AKR1C2   |
| MOL004978 | GC66 | GAN CAO | 1e7e_v | 0.9736 | ALBU_HUMAN  | ALB      |
| MOL004978 | GC66 | GAN CAO | 2pir_v | 0.9354 | ANDR_HUMAN  | AR       |
| MOL004978 | GC66 | GAN CAO | 1l6l_v | 0.9709 | APOA2_HUMAN | APOA2    |
| MOL004978 | GC66 | GAN CAO | 2ohp_v | 0.9174 | BACE1_HUMAN | BACE1    |
| MOL004978 | GC66 | GAN CAO | 1reu_v | 0.9628 | BMP2_HUMAN  | BMP2     |

|           |      |         |        |        |             |          |
|-----------|------|---------|--------|--------|-------------|----------|
| MOL004978 | GC66 | GAN CAO | 1gwq_v | 0.9076 | ESR1_HUMAN  | ESR1     |
| MOL004978 | GC66 | GAN CAO | 2jj3_v | 0.9835 | ESR2_HUMAN  | ESR2     |
| MOL004978 | GC66 | GAN CAO | 1ya8_v | 0.9492 | EST1_HUMAN  | CES1     |
| MOL004978 | GC66 | GAN CAO | 3dcw_v | 0.971  | P00918      | CA2      |
| MOL004978 | GC66 | GAN CAO | 1yxx_v | 0.9784 | PIM1_HUMAN  | PIM1     |
| MOL004978 | GC66 | GAN CAO | 2a4z_v | 0.9735 | PK3CG_HUMAN | PIK3CG   |
| MOL004978 | GC66 | GAN CAO | 1wbw_v | 0.99   | Q16539      | MAPK14   |
| MOL004978 | GC66 | GAN CAO | 1p49_v | 0.9676 | STS_HUMAN   | STS      |
| MOL004980 | GC67 | GAN CAO | 1j96_v | 0.9732 | AK1C2_HUMAN | AKR1C2   |
| MOL004980 | GC67 | GAN CAO | 1xf0_v | 0.9785 | AK1C3_HUMAN | AKR1C3   |
| MOL004980 | GC67 | GAN CAO | 1e7e_v | 1      | ALBU_HUMAN  | ALB      |
| MOL004980 | GC67 | GAN CAO | 2pdk_v | 0.9857 | ALDR_HUMAN  | AKR1B1   |
| MOL004980 | GC67 | GAN CAO | 2pir_v | 0.9914 | ANDR_HUMAN  | AR       |
| MOL004980 | GC67 | GAN CAO | 1hak_v | 0.9003 | ANXA5_HUMAN | ANXA5    |
| MOL004980 | GC67 | GAN CAO | 1l6l_v | 0.9978 | APOA2_HUMAN | APOA2    |
| MOL004980 | GC67 | GAN CAO | 2ohp_v | 0.9738 | BACE1_HUMAN | BACE1    |
| MOL004980 | GC67 | GAN CAO | 1reu_v | 0.9586 | BMP2_HUMAN  | BMP2     |
| MOL004980 | GC67 | GAN CAO | 1okl_v | 0.9835 | CAH2_HUMAN  | CA2      |
| MOL004980 | GC67 | GAN CAO | 1gfw_v | 0.9505 | CASP3_HUMAN | CASP3    |
| MOL004980 | GC67 | GAN CAO | 1shj_v | 0.9713 | CASP7_HUMAN | CASP7    |
| MOL004980 | GC67 | GAN CAO | 1rs0_v | 0.9705 | CFAB_HUMAN  | CFB      |
| MOL004980 | GC67 | GAN CAO | 2brb_v | 0.9886 | CHK1_HUMAN  | CHEK1    |
| MOL004980 | GC67 | GAN CAO | 1yb1_v | 0.9499 | DHB11_HUMAN | HSD17B11 |
| MOL004980 | GC67 | GAN CAO | 2vwu_v | 0.9601 | EPHB4_HUMAN | EPHB4    |
| MOL004980 | GC67 | GAN CAO | 2ocf_v | 0.9851 | ESR1_HUMAN  | ESR1     |
| MOL004980 | GC67 | GAN CAO | 1ya8_v | 0.918  | EST1_HUMAN  | CES1     |
| MOL004980 | GC67 | GAN CAO | 1md3_v | 0.9688 | GSTP1_HUMAN | GSTP1    |
| MOL004980 | GC67 | GAN CAO | 2pg2_v | 0.9612 | KIF11_HUMAN | KIF11    |
| MOL004980 | GC67 | GAN CAO | 1pme_v | 0.9994 | MK01_HUMAN  | MAPK1    |
| MOL004980 | GC67 | GAN CAO | 1uki_v | 0.9984 | MK08_HUMAN  | MAPK8    |
| MOL004980 | GC67 | GAN CAO | 1pmv_v | 0.9988 | MK10_HUMAN  | MAPK10   |
| MOL004980 | GC67 | GAN CAO | 1eub_v | 1      | MMP13_HUMAN | MMP13    |
| MOL004980 | GC67 | GAN CAO | 2pin_v | 0.9914 | P10828      | THRB     |
| MOL004980 | GC67 | GAN CAO | 3bgp_v | 1      | P11309      | PIM1     |
| MOL004980 | GC67 | GAN CAO | 3eqm_v | 0.9886 | P11511      | CYP19A1  |
| MOL004980 | GC67 | GAN CAO | 1fdu_v | 0.9436 | P14061      | HSD17B1  |
| MOL004980 | GC67 | GAN CAO | 2vth_v | 0.9814 | P24941      | CDK2     |
| MOL004980 | GC67 | GAN CAO | 3cjf_v | 0.9785 | P35968      | KDR      |
| MOL004980 | GC67 | GAN CAO | 2p3g_v | 0.97   | P49137      | MAPKAPK2 |
| MOL004980 | GC67 | GAN CAO | 1w8l_v | 0.9169 | P62937      | PPIA     |
| MOL004980 | GC67 | GAN CAO | 1zuc_v | 0.9705 | PRGR_HUMAN  | PGR      |
| MOL004980 | GC67 | GAN CAO | 1wbo_v | 0.9967 | Q16539      | MAPK14   |

|           |      |         |        |        |             |          |
|-----------|------|---------|--------|--------|-------------|----------|
| MOL004980 | GC67 | GAN CAO | 1p49_v | 0.9974 | STS_HUMAN   | STS      |
| MOL004980 | GC67 | GAN CAO | 1no9_v | 0.9243 | THRB_HUMAN  | F2       |
| MOL004980 | GC67 | GAN CAO | 1dvz_v | 0.956  | TTHY_HUMAN  | TTR      |
| MOL004985 | GC68 | GAN CAO | 2oi0_v | 0.9187 | ADA17_HUMAN | ADAM17   |
| MOL004985 | GC68 | GAN CAO | 1j96_v | 0.9366 | AK1C2_HUMAN | AKR1C2   |
| MOL004985 | GC68 | GAN CAO | 1e7e_v | 0.9725 | ALBU_HUMAN  | ALB      |
| MOL004985 | GC68 | GAN CAO | 2ine_v | 0.9723 | ALDR_HUMAN  | AKR1B1   |
| MOL004985 | GC68 | GAN CAO | 1oj9_v | 0.9824 | AOFB_HUMAN  | MAOB     |
| MOL004985 | GC68 | GAN CAO | 1l6l_v | 0.9685 | APOA2_HUMAN | APOA2    |
| MOL004985 | GC68 | GAN CAO | 3bmp_v | 0.9999 | BMP2_HUMAN  | BMP2     |
| MOL004985 | GC68 | GAN CAO | 1if4_v | 0.9764 | CAH2_HUMAN  | CA2      |
| MOL004985 | GC68 | GAN CAO | 3dej_v | 0.9033 | CASP3_HUMAN | CASP3    |
| MOL004985 | GC68 | GAN CAO | 1shj_v | 0.9653 | CASP7_HUMAN | CASP7    |
| MOL004985 | GC68 | GAN CAO | 1h1p_v | 0.965  | CCNA2_HUMAN | CCNA2    |
| MOL004985 | GC68 | GAN CAO | 2cgw_v | 0.9288 | CHK1_HUMAN  | CHEK1    |
| MOL004985 | GC68 | GAN CAO | 1p0i_v | 0.9152 | CHLE_HUMAN  | BCHE     |
| MOL004985 | GC68 | GAN CAO | 1klt_v | 0.901  | CMA1_HUMAN  | CMA1     |
| MOL004985 | GC68 | GAN CAO | 1yb1_v | 0.9644 | DHB11_HUMAN | HSD17B11 |
| MOL004985 | GC68 | GAN CAO | 2vwu_v | 0.9053 | EPHB4_HUMAN | EPHB4    |
| MOL004985 | GC68 | GAN CAO | 1lbk_v | 0.9913 | GSTP1_HUMAN | GSTP1    |
| MOL004985 | GC68 | GAN CAO | 2pg2_v | 0.9876 | KIF11_HUMAN | KIF11    |
| MOL004985 | GC68 | GAN CAO | 1pme_v | 0.9983 | MK01_HUMAN  | MAPK1    |
| MOL004985 | GC68 | GAN CAO | 2gmx_v | 0.9912 | MK08_HUMAN  | MAPK8    |
| MOL004985 | GC68 | GAN CAO | 1eub_v | 0.9719 | MMP13_HUMAN | MMP13    |
| MOL004985 | GC68 | GAN CAO | 1qq_s  | 0.921  | NGAL_HUMAN  | LCN2     |
| MOL004985 | GC68 | GAN CAO | 1xv9_v | 0.9782 | NR1I3_HUMAN | NR1I3    |
| MOL004985 | GC68 | GAN CAO | 2pin_v | 0.9668 | P10828      | THRB     |
| MOL004985 | GC68 | GAN CAO | 3bgp_v | 0.9792 | P11309      | PIM1     |
| MOL004985 | GC68 | GAN CAO | 3eqm_v | 0.9258 | P11511      | CYP19A1  |
| MOL004985 | GC68 | GAN CAO | 2exm_v | 0.9715 | P24941      | CDK2     |
| MOL004985 | GC68 | GAN CAO | 2jbp_v | 0.9887 | P49137      | MAPKAPK2 |
| MOL004985 | GC68 | GAN CAO | 1w8l_v | 0.9676 | P62937      | PPIA     |
| MOL004985 | GC68 | GAN CAO | 1zgy_v | 0.9538 | PPARG_HUMAN | PPARG    |
| MOL004985 | GC68 | GAN CAO | 2f6v_v | 0.99   | PTN1_HUMAN  | PTPN1    |
| MOL004985 | GC68 | GAN CAO | 1n83_v | 0.9159 | RORA_HUMAN  | RORA     |
| MOL004985 | GC68 | GAN CAO | 1p49_v | 0.9703 | STS_HUMAN   | STS      |
| MOL004985 | GC68 | GAN CAO | 2roy_v | 0.9308 | TTHY_HUMAN  | TTR      |
| MOL004985 | GC68 | GAN CAO | 1j78_v | 0.9084 | VTDB_HUMAN  | GC       |
| MOL004988 | GC69 | GAN CAO | 1j96_v | 0.9601 | AK1C2_HUMAN | AKR1C2   |
| MOL004988 | GC69 | GAN CAO | 1xf0_v | 0.9657 | AK1C3_HUMAN | AKR1C3   |
| MOL004988 | GC69 | GAN CAO | 1e7e_v | 0.9921 | ALBU_HUMAN  | ALB      |
| MOL004988 | GC69 | GAN CAO | 2pir_v | 0.9721 | ANDR_HUMAN  | AR       |



|           |      |         |        |        |             |         |
|-----------|------|---------|--------|--------|-------------|---------|
| MOL004988 | GC69 | GAN CAO | 1oj9_v | 0.9261 | AOFB_HUMAN  | MAOB    |
| MOL004988 | GC69 | GAN CAO | 1l6l_v | 1      | APOA2_HUMAN | APOA2   |
| MOL004988 | GC69 | GAN CAO | 2ohp_v | 0.9579 | BACE1_HUMAN | BACE1   |
| MOL004988 | GC69 | GAN CAO | 1reu_v | 0.9817 | BMP2_HUMAN  | BMP2    |
| MOL004988 | GC69 | GAN CAO | 3ca2_v | 0.9661 | CAH2_HUMAN  | CA2     |
| MOL004988 | GC69 | GAN CAO | 3dej_v | 0.9302 | CASP3_HUMAN | CASP3   |
| MOL004988 | GC69 | GAN CAO | 1shj_v | 0.9585 | CASP7_HUMAN | CASP7   |
| MOL004988 | GC69 | GAN CAO | 1rs0_v | 0.9413 | CFAB_HUMAN  | CFB     |
| MOL004988 | GC69 | GAN CAO | 1ya8_v | 0.9564 | EST1_HUMAN  | CES1    |
| MOL004988 | GC69 | GAN CAO | 2fky_v | 0.9298 | KIF11_HUMAN | KIF11   |
| MOL004988 | GC69 | GAN CAO | 1pme_v | 0.989  | MK01_HUMAN  | MAPK1   |
| MOL004988 | GC69 | GAN CAO | 1o6u_v | 0.9135 | O76054      | SEC14L2 |
| MOL004988 | GC69 | GAN CAO | 3bgp_v | 0.9937 | P11309      | PIM1    |
| MOL004988 | GC69 | GAN CAO | 3eqm_v | 0.9061 | P11511      | CYP19A1 |
| MOL004988 | GC69 | GAN CAO | 1v3q_v | 0.9571 | PNPH_HUMAN  | PNP     |
| MOL004988 | GC69 | GAN CAO | 1wbo_v | 0.9945 | Q16539      | MAPK14  |
| MOL004988 | GC69 | GAN CAO | 1p49_v | 1      | STS_HUMAN   | STS     |
| MOL004988 | GC69 | GAN CAO | 1dvz_v | 0.9694 | TTHY_HUMAN  | TTR     |
| MOL004988 | GC69 | GAN CAO | 1j78_v | 0.9171 | VTDB_HUMAN  | GC      |
| MOL003896 | GC7  | GAN CAO | 2pir_v | 0.9146 | ANDR_HUMAN  | AR      |
| MOL003896 | GC7  | GAN CAO | 1uki_v | 0.9176 | MK08_HUMAN  | MAPK8   |
| MOL003896 | GC7  | GAN CAO | 1pmv_v | 0.9311 | MK10_HUMAN  | MAPK10  |
| MOL003896 | GC7  | GAN CAO | 3bgp_v | 0.925  | P11309      | PIM1    |
| MOL003896 | GC7  | GAN CAO | 1no9_v | 0.9819 | THRB_HUMAN  | F2      |
| MOL004989 | GC70 | GAN CAO | 1e7e_v | 0.9381 | ALBU_HUMAN  | ALB     |
| MOL004989 | GC70 | GAN CAO | 2pit_v | 0.9574 | ANDR_HUMAN  | AR      |
| MOL004989 | GC70 | GAN CAO | 1oj9_v | 0.9451 | AOFB_HUMAN  | MAOB    |
| MOL004989 | GC70 | GAN CAO | 1l6l_v | 0.9613 | APOA2_HUMAN | APOA2   |
| MOL004989 | GC70 | GAN CAO | 1if4_v | 0.9732 | CAH2_HUMAN  | CA2     |
| MOL004989 | GC70 | GAN CAO | 1shj_v | 0.9766 | CASP7_HUMAN | CASP7   |
| MOL004989 | GC70 | GAN CAO | 1lyw_v | 0.9036 | CATD_HUMAN  | CTSD    |
| MOL004989 | GC70 | GAN CAO | 1rs0_v | 0.9983 | CFAB_HUMAN  | CFB     |
| MOL004989 | GC70 | GAN CAO | 2ywp_v | 0.9547 | CHK1_HUMAN  | CHEK1   |
| MOL004989 | GC70 | GAN CAO | 1xlu_v | 0.9679 | CHLE_HUMAN  | BCHE    |
| MOL004989 | GC70 | GAN CAO | 2ocf_v | 0.9832 | ESR1_HUMAN  | ESR1    |
| MOL004989 | GC70 | GAN CAO | 1ya8_v | 0.9466 | EST1_HUMAN  | CES1    |
| MOL004989 | GC70 | GAN CAO | 2hck_v | 0.9849 | HCK_HUMAN   | HCK     |
| MOL004989 | GC70 | GAN CAO | 1uki_v | 0.9657 | MK08_HUMAN  | MAPK8   |
| MOL004989 | GC70 | GAN CAO | 3cgf_v | 0.9602 | MK10_HUMAN  | MAPK10  |
| MOL004989 | GC70 | GAN CAO | 2obj_v | 0.9571 | P11309      | PIM1    |
| MOL004989 | GC70 | GAN CAO | 3eqm_v | 0.9175 | P11511      | CYP19A1 |
| MOL004989 | GC70 | GAN CAO | 3cjf_v | 0.9602 | P35968      | KDR     |

|           |      |         |        |        |             |         |
|-----------|------|---------|--------|--------|-------------|---------|
| MOL004989 | GC70 | GAN CAO | 1w8l_v | 0.9186 | P62937      | PPIA    |
| MOL004989 | GC70 | GAN CAO | 1z68_v | 0.9295 | SEPR_HUMAN  | FAP     |
| MOL004989 | GC70 | GAN CAO | 1p49_v | 0.9688 | STS_HUMAN   | STS     |
| MOL004989 | GC70 | GAN CAO | 1no9_v | 0.9521 | THRB_HUMAN  | F2      |
| MOL004989 | GC70 | GAN CAO | 1dvz_v | 0.9831 | TTHY_HUMAN  | TTR     |
| MOL004990 | GC71 | GAN CAO | 1x97_v | 0.9525 | ALDR_HUMAN  | AKR1B1  |
| MOL004990 | GC71 | GAN CAO | 2q7j_v | 0.9865 | ANDR_HUMAN  | AR      |
| MOL004990 | GC71 | GAN CAO | 1unh_v | 0.9043 | CD5R1_HUMAN | CDK5R1  |
| MOL004990 | GC71 | GAN CAO | 1rs0_v | 0.9725 | CFAB_HUMAN  | CFB     |
| MOL004990 | GC71 | GAN CAO | 2j5f_v | 0.9069 | EGFR_HUMAN  | EGFR    |
| MOL004990 | GC71 | GAN CAO | 2vwu_v | 0.9293 | EPHB4_HUMAN | EPHB4   |
| MOL004990 | GC71 | GAN CAO | 2i0j_v | 0.9826 | ESR1_HUMAN  | ESR1    |
| MOL004990 | GC71 | GAN CAO | 1x7j_v | 0.9867 | ESR2_HUMAN  | ESR2    |
| MOL004990 | GC71 | GAN CAO | 1ya8_v | 0.993  | EST1_HUMAN  | CES1    |
| MOL004990 | GC71 | GAN CAO | 1lbk_v | 0.9326 | GSTP1_HUMAN | GSTP1   |
| MOL004990 | GC71 | GAN CAO | 1glq_v | 0.9485 | LYAM3_HUMAN | SELP    |
| MOL004990 | GC71 | GAN CAO | 1uki_v | 0.989  | MK08_HUMAN  | MAPK8   |
| MOL004990 | GC71 | GAN CAO | 1pmv_v | 0.9974 | MK10_HUMAN  | MAPK10  |
| MOL004990 | GC71 | GAN CAO | 1bm6_v | 0.9922 | MMP3_HUMAN  | MMP3    |
| MOL004990 | GC71 | GAN CAO | 1pq9_v | 0.9609 | NR1H2_HUMAN | NR1H2   |
| MOL004990 | GC71 | GAN CAO | 3eqm_v | 0.9585 | P11511      | CYP19A1 |
| MOL004990 | GC71 | GAN CAO | 1w8m_v | 0.9234 | P62937      | PPIA    |
| MOL004990 | GC71 | GAN CAO | 1xoz_v | 0.9074 | PDE5A_HUMAN | PDE5A   |
| MOL004990 | GC71 | GAN CAO | 1yxx_v | 0.9775 | PIM1_HUMAN  | PIM1    |
| MOL004990 | GC71 | GAN CAO | 1w7h_v | 0.9004 | Q16539      | MAPK14  |
| MOL004990 | GC71 | GAN CAO | 1q8m_v | 0.9868 | Q9NP99      | TREM1   |
| MOL004990 | GC71 | GAN CAO | 1nub_v | 0.9471 | SPRC_HUMAN  | SPARC   |
| MOL004990 | GC71 | GAN CAO | 1no9_v | 0.9921 | THRB_HUMAN  | F2      |
| MOL004991 | GC72 | GAN CAO | 2qo8_v | 0.9868 | CAH2_HUMAN  | CA2     |
| MOL004991 | GC72 | GAN CAO | 1vec_v | 0.97   | DDX6_HUMAN  | DDX6    |
| MOL004991 | GC72 | GAN CAO | 1uki_v | 0.905  | MK08_HUMAN  | MAPK8   |
| MOL004991 | GC72 | GAN CAO | 1pmv_v | 0.9209 | MK10_HUMAN  | MAPK10  |
| MOL004991 | GC72 | GAN CAO | 2ovm_v | 0.9189 | PRGR_HUMAN  | PGR     |
| MOL004991 | GC72 | GAN CAO | 1no9_v | 0.9895 | THRB_HUMAN  | F2      |
| MOL004993 | GC73 | GAN CAO | 1j96_v | 0.9832 | AK1C2_HUMAN | AKR1C2  |
| MOL004993 | GC73 | GAN CAO | 1xj7_v | 0.9592 | ANDR_HUMAN  | AR      |
| MOL004993 | GC73 | GAN CAO | 1l6l_v | 0.9379 | APOA2_HUMAN | APOA2   |
| MOL004993 | GC73 | GAN CAO | 2ohp_v | 0.9763 | BACE1_HUMAN | BACE1   |
| MOL004993 | GC73 | GAN CAO | 1reu_v | 0.9632 | BMP2_HUMAN  | BMP2    |
| MOL004993 | GC73 | GAN CAO | 2osf_v | 0.9712 | CAH2_HUMAN  | CA2     |
| MOL004993 | GC73 | GAN CAO | 1shj_v | 0.9462 | CASP7_HUMAN | CASP7   |
| MOL004993 | GC73 | GAN CAO | 1xo2_v | 0.9174 | CDK6_HUMAN  | CDK6    |

|           |      |         |        |        |             |          |
|-----------|------|---------|--------|--------|-------------|----------|
| MOL004993 | GC73 | GAN CAO | 1rs0_v | 0.9655 | CFAB_HUMAN  | CFB      |
| MOL004993 | GC73 | GAN CAO | 2br1_v | 0.9868 | CHK1_HUMAN  | CHEK1    |
| MOL004993 | GC73 | GAN CAO | 1xlu_v | 0.9643 | CHLE_HUMAN  | BCHE     |
| MOL004993 | GC73 | GAN CAO | 2vwu_v | 0.9397 | EPHB4_HUMAN | EPHB4    |
| MOL004993 | GC73 | GAN CAO | 2ocf_v | 0.9542 | ESR1_HUMAN  | ESR1     |
| MOL004993 | GC73 | GAN CAO | 1f40_v | 0.9508 | FKB1A_HUMAN | FKBP1A   |
| MOL004993 | GC73 | GAN CAO | 1md3_v | 0.9759 | GSTP1_HUMAN | GSTP1    |
| MOL004993 | GC73 | GAN CAO | 2hck_v | 0.9812 | HCK_HUMAN   | HCK      |
| MOL004993 | GC73 | GAN CAO | 2byi_v | 0.9149 | HS90A_HUMAN | HSP90AA1 |
| MOL004993 | GC73 | GAN CAO | 2pg2_v | 0.9864 | KIF11_HUMAN | KIF11    |
| MOL004993 | GC73 | GAN CAO | 3cgf_v | 0.911  | MK10_HUMAN  | MAPK10   |
| MOL004993 | GC73 | GAN CAO | 1eub_v | 0.9556 | MMP13_HUMAN | MMP13    |
| MOL004993 | GC73 | GAN CAO | 2obj_v | 0.9602 | P11309      | PIM1     |
| MOL004993 | GC73 | GAN CAO | 3eqm_v | 0.9411 | P11511      | CYP19A1  |
| MOL004993 | GC73 | GAN CAO | 1e1x_v | 0.942  | P24941      | CDK2     |
| MOL004993 | GC73 | GAN CAO | 3cjf_v | 0.9111 | P35968      | KDR      |
| MOL004993 | GC73 | GAN CAO | 2p3g_v | 0.9224 | P49137      | MAPKAPK2 |
| MOL004993 | GC73 | GAN CAO | 1w8l_v | 0.9112 | P62937      | PPIA     |
| MOL004993 | GC73 | GAN CAO | 1zuc_v | 0.9484 | PRGR_HUMAN  | PGR      |
| MOL004993 | GC73 | GAN CAO | 2j7x_v | 0.9235 | Q62986      | Esr2     |
| MOL004993 | GC73 | GAN CAO | 1z68_v | 0.9159 | SEPR_HUMAN  | FAP      |
| MOL004993 | GC73 | GAN CAO | 1no9_v | 0.9589 | THRB_HUMAN  | F2       |
| MOL004993 | GC73 | GAN CAO | 1dvz_v | 0.9492 | TTHY_HUMAN  | TTR      |
| MOL004996 | GC74 | GAN CAO | 2oi0_v | 0.9261 | ADA17_HUMAN | ADAM17   |
| MOL004996 | GC74 | GAN CAO | 1j96_v | 0.939  | AK1C2_HUMAN | AKR1C2   |
| MOL004996 | GC74 | GAN CAO | 1e7e_v | 0.9722 | ALBU_HUMAN  | ALB      |
| MOL004996 | GC74 | GAN CAO | 2ine_v | 0.9676 | ALDR_HUMAN  | AKR1B1   |
| MOL004996 | GC74 | GAN CAO | 1oj9_v | 0.9828 | AOFB_HUMAN  | MAOB     |
| MOL004996 | GC74 | GAN CAO | 1l6l_v | 0.9676 | APOA2_HUMAN | APOA2    |
| MOL004996 | GC74 | GAN CAO | 1reu_v | 0.9999 | BMP2_HUMAN  | BMP2     |
| MOL004996 | GC74 | GAN CAO | 1if4_v | 0.988  | CAH2_HUMAN  | CA2      |
| MOL004996 | GC74 | GAN CAO | 1gfw_v | 0.9408 | CASP3_HUMAN | CASP3    |
| MOL004996 | GC74 | GAN CAO | 1shj_v | 0.9755 | CASP7_HUMAN | CASP7    |
| MOL004996 | GC74 | GAN CAO | 1h1p_v | 0.9882 | CCNA2_HUMAN | CCNA2    |
| MOL004996 | GC74 | GAN CAO | 1rs0_v | 0.9643 | CFAB_HUMAN  | CFB      |
| MOL004996 | GC74 | GAN CAO | 2brg_v | 0.9769 | CHK1_HUMAN  | CHEK1    |
| MOL004996 | GC74 | GAN CAO | 1p0i_v | 0.9355 | CHLE_HUMAN  | BCHE     |
| MOL004996 | GC74 | GAN CAO | 1yb1_v | 0.9798 | DHB11_HUMAN | HSD17B11 |
| MOL004996 | GC74 | GAN CAO | 2vwu_v | 0.9605 | EPHB4_HUMAN | EPHB4    |
| MOL004996 | GC74 | GAN CAO | 2j38_v | 0.9114 | FA10_HUMAN  | F10      |
| MOL004996 | GC74 | GAN CAO | 1lbk_v | 0.9601 | GSTP1_HUMAN | GSTP1    |
| MOL004996 | GC74 | GAN CAO | 2pg2_v | 0.9873 | KIF11_HUMAN | KIF11    |

|           |      |         |         |        |             |          |
|-----------|------|---------|---------|--------|-------------|----------|
| MOL004996 | GC74 | GAN CAO | 1pme_v  | 0.9974 | MK01_HUMAN  | MAPK1    |
| MOL004996 | GC74 | GAN CAO | 1pmv_v  | 0.9118 | MK10_HUMAN  | MAPK10   |
| MOL004996 | GC74 | GAN CAO | 1eub_v  | 0.9761 | MMP13_HUMAN | MMP13    |
| MOL004996 | GC74 | GAN CAO | 1qq_s_v | 0.9651 | NGAL_HUMAN  | LCN2     |
| MOL004996 | GC74 | GAN CAO | 1xv9_v  | 0.9534 | NR1I3_HUMAN | NR1I3    |
| MOL004996 | GC74 | GAN CAO | 2pin_v  | 0.9836 | P10828      | THRB     |
| MOL004996 | GC74 | GAN CAO | 3bgp_v  | 0.9995 | P11309      | PIM1     |
| MOL004996 | GC74 | GAN CAO | 1e1x_v  | 0.9824 | P24941      | CDK2     |
| MOL004996 | GC74 | GAN CAO | 2jbp_v  | 0.984  | P49137      | MAPKAPK2 |
| MOL004996 | GC74 | GAN CAO | 1oni_v  | 0.9489 | P52758      | RIDA     |
| MOL004996 | GC74 | GAN CAO | 1w8l_v  | 0.9581 | P62937      | PPIA     |
| MOL004996 | GC74 | GAN CAO | 1zgy_v  | 0.977  | PPARG_HUMAN | PPARG    |
| MOL004996 | GC74 | GAN CAO | 1hd2_v  | 0.9619 | PRDX5_HUMAN | PRDX5    |
| MOL004996 | GC74 | GAN CAO | 2f6t_v  | 0.9947 | PTN1_HUMAN  | PTPN1    |
| MOL004996 | GC74 | GAN CAO | 1bl6_v  | 0.9185 | Q16539      | MAPK14   |
| MOL004996 | GC74 | GAN CAO | 1p49_v  | 0.971  | STS_HUMAN   | STS      |
| MOL004996 | GC74 | GAN CAO | 2roy_v  | 0.9884 | TTHY_HUMAN  | TTR      |
| MOL004996 | GC74 | GAN CAO | 1j78_v  | 0.9505 | VTDB_HUMAN  | GC       |
| MOL000500 | GC75 | GAN CAO | 2agt_v  | 0.9788 | ALDR_HUMAN  | AKR1B1   |
| MOL000500 | GC75 | GAN CAO | 2pir_v  | 0.9686 | ANDR_HUMAN  | AR       |
| MOL000500 | GC75 | GAN CAO | 1l6l_v  | 0.9516 | APOA2_HUMAN | APOA2    |
| MOL000500 | GC75 | GAN CAO | 1shj_v  | 0.9452 | CASP7_HUMAN | CASP7    |
| MOL000500 | GC75 | GAN CAO | 1rs0_v  | 0.903  | CFAB_HUMAN  | CFB      |
| MOL000500 | GC75 | GAN CAO | 2vwu_v  | 0.9018 | EPHB4_HUMAN | EPHB4    |
| MOL000500 | GC75 | GAN CAO | 2i0j_v  | 0.9909 | ESR1_HUMAN  | ESR1     |
| MOL000500 | GC75 | GAN CAO | 1qkm_v  | 0.9427 | ESR2_HUMAN  | ESR2     |
| MOL000500 | GC75 | GAN CAO | 1ya8_v  | 0.9417 | EST1_HUMAN  | CES1     |
| MOL000500 | GC75 | GAN CAO | 1bm6_v  | 0.9009 | MMP3_HUMAN  | MMP3     |
| MOL000500 | GC75 | GAN CAO | 3dcw_v  | 0.9343 | P00918      | CA2      |
| MOL000500 | GC75 | GAN CAO | 3eqm_v  | 0.9964 | P11511      | CYP19A1  |
| MOL000500 | GC75 | GAN CAO | 2p3g_v  | 0.9704 | P49137      | MAPKAPK2 |
| MOL000500 | GC75 | GAN CAO | 1yxx_v  | 0.9576 | PIM1_HUMAN  | PIM1     |
| MOL000500 | GC75 | GAN CAO | 1p49_v  | 0.9553 | STS_HUMAN   | STS      |
| MOL005000 | GC76 | GAN CAO | 1e7e_v  | 0.9349 | ALBU_HUMAN  | ALB      |
| MOL005000 | GC76 | GAN CAO | 1x97_v  | 0.9409 | ALDR_HUMAN  | AKR1B1   |
| MOL005000 | GC76 | GAN CAO | 1l6l_v  | 0.9485 | APOA2_HUMAN | APOA2    |
| MOL005000 | GC76 | GAN CAO | 2ohp_v  | 0.9544 | BACE1_HUMAN | BACE1    |
| MOL005000 | GC76 | GAN CAO | 1czm_v  | 0.9644 | CAH1_HUMAN  | CA1      |
| MOL005000 | GC76 | GAN CAO | 1if4_v  | 0.9466 | CAH2_HUMAN  | CA2      |
| MOL005000 | GC76 | GAN CAO | 1shj_v  | 0.981  | CASP7_HUMAN | CASP7    |
| MOL005000 | GC76 | GAN CAO | 2flg_v  | 0.9049 | CATS_HUMAN  | CTSS     |
| MOL005000 | GC76 | GAN CAO | 1rs0_v  | 0.9833 | CFAB_HUMAN  | CFB      |

|           |      |         |        |        |             |         |
|-----------|------|---------|--------|--------|-------------|---------|
| MOL005000 | GC76 | GAN CAO | 1xlu_v | 0.9622 | CHLE_HUMAN  | BCHE    |
| MOL005000 | GC76 | GAN CAO | 1x7r_v | 0.9643 | ESR1_HUMAN  | ESR1    |
| MOL005000 | GC76 | GAN CAO | 1qkm_v | 0.9916 | ESR2_HUMAN  | ESR2    |
| MOL005000 | GC76 | GAN CAO | 1ya8_v | 0.931  | EST1_HUMAN  | CES1    |
| MOL005000 | GC76 | GAN CAO | 3chs_v | 0.9553 | LKHA4_HUMAN | LTA4H   |
| MOL005000 | GC76 | GAN CAO | 1pme_v | 0.9733 | MK01_HUMAN  | MAPK1   |
| MOL005000 | GC76 | GAN CAO | luki_v | 0.9483 | MK08_HUMAN  | MAPK8   |
| MOL005000 | GC76 | GAN CAO | 1pmv_v | 0.973  | MK10_HUMAN  | MAPK10  |
| MOL005000 | GC76 | GAN CAO | 1bm6_v | 0.9671 | MMP3_HUMAN  | MMP3    |
| MOL005000 | GC76 | GAN CAO | 3eqm_v | 0.9147 | P11511      | CYP19A1 |
| MOL005000 | GC76 | GAN CAO | 1jvp_v | 0.9601 | P24941      | CDK2    |
| MOL005000 | GC76 | GAN CAO | 3cjf_v | 0.9446 | P35968      | KDR     |
| MOL005000 | GC76 | GAN CAO | 1w8l_v | 0.9179 | P62937      | PPIA    |
| MOL005000 | GC76 | GAN CAO | 1mkd_v | 0.9101 | PDE4D_HUMAN | PDE4D   |
| MOL005000 | GC76 | GAN CAO | 1xoz_v | 0.9502 | PDE5A_HUMAN | PDE5A   |
| MOL005000 | GC76 | GAN CAO | 1yxx_v | 0.9916 | PIM1_HUMAN  | PIM1    |
| MOL005000 | GC76 | GAN CAO | 1wbo_v | 0.9849 | Q16539      | MAPK14  |
| MOL005000 | GC76 | GAN CAO | 1p49_v | 0.9691 | STS_HUMAN   | STS     |
| MOL005000 | GC76 | GAN CAO | 1no9_v | 0.904  | THRB_HUMAN  | F2      |
| MOL005000 | GC76 | GAN CAO | 1dvz_v | 0.987  | TTHY_HUMAN  | TTR     |
| MOL005001 | GC77 | GAN CAO | 1j96_v | 0.9957 | AK1C2_HUMAN | AKR1C2  |
| MOL005001 | GC77 | GAN CAO | 1e7e_v | 0.9388 | ALBU_HUMAN  | ALB     |
| MOL005001 | GC77 | GAN CAO | 1x97_v | 0.946  | ALDR_HUMAN  | AKR1B1  |
| MOL005001 | GC77 | GAN CAO | 1oj9_v | 0.9495 | AOFB_HUMAN  | MAOB    |
| MOL005001 | GC77 | GAN CAO | 1l6l_v | 0.9646 | APOA2_HUMAN | APOA2   |
| MOL005001 | GC77 | GAN CAO | 2ohp_v | 0.9676 | BACE1_HUMAN | BACE1   |
| MOL005001 | GC77 | GAN CAO | 1reu_v | 0.9561 | BMP2_HUMAN  | BMP2    |
| MOL005001 | GC77 | GAN CAO | 1czm_v | 0.9608 | CAH1_HUMAN  | CA1     |
| MOL005001 | GC77 | GAN CAO | 1if4_v | 0.9928 | CAH2_HUMAN  | CA2     |
| MOL005001 | GC77 | GAN CAO | 1shj_v | 0.9787 | CASP7_HUMAN | CASP7   |
| MOL005001 | GC77 | GAN CAO | 1unh_v | 0.9412 | CD5R1_HUMAN | CDK5R1  |
| MOL005001 | GC77 | GAN CAO | 1rs0_v | 0.946  | CFAB_HUMAN  | CFB     |
| MOL005001 | GC77 | GAN CAO | 1xlu_v | 0.9618 | CHLE_HUMAN  | BCHE    |
| MOL005001 | GC77 | GAN CAO | 2vwu_v | 0.946  | EPHB4_HUMAN | EPHB4   |
| MOL005001 | GC77 | GAN CAO | 2ocf_v | 0.9756 | ESR1_HUMAN  | ESR1    |
| MOL005001 | GC77 | GAN CAO | 1qkm_v | 0.9864 | ESR2_HUMAN  | ESR2    |
| MOL005001 | GC77 | GAN CAO | 1ya8_v | 0.951  | EST1_HUMAN  | CES1    |
| MOL005001 | GC77 | GAN CAO | 1ogs_v | 0.9198 | GLCM_HUMAN  | GBA     |
| MOL005001 | GC77 | GAN CAO | 2fky_v | 0.9371 | KIF11_HUMAN | KIF11   |
| MOL005001 | GC77 | GAN CAO | 3chs_v | 0.9597 | LKHA4_HUMAN | LTA4H   |
| MOL005001 | GC77 | GAN CAO | 1pme_v | 0.9926 | MK01_HUMAN  | MAPK1   |
| MOL005001 | GC77 | GAN CAO | luki_v | 0.9399 | MK08_HUMAN  | MAPK8   |

|           |      |         |        |        |             |          |
|-----------|------|---------|--------|--------|-------------|----------|
| MOL005001 | GC77 | GAN CAO | 3cgf_v | 0.9511 | MK10_HUMAN  | MAPK10   |
| MOL005001 | GC77 | GAN CAO | 830c_v | 0.9453 | MMP13_HUMAN | MMP13    |
| MOL005001 | GC77 | GAN CAO | 1bm6_v | 0.9706 | MMP3_HUMAN  | MMP3     |
| MOL005001 | GC77 | GAN CAO | 3eqm_v | 0.9071 | P11511      | CYP19A1  |
| MOL005001 | GC77 | GAN CAO | 1jvp_v | 0.9701 | P24941      | CDK2     |
| MOL005001 | GC77 | GAN CAO | 3cjf_v | 0.9511 | P35968      | KDR      |
| MOL005001 | GC77 | GAN CAO | 2jbp_v | 0.9677 | P49137      | 4APKAPK2 |
| MOL005001 | GC77 | GAN CAO | 1udu_v | 0.9586 | PDE5A_HUMAN | PDE5A    |
| MOL005001 | GC77 | GAN CAO | 1yxx_v | 0.9728 | PIM1_HUMAN  | PIM1     |
| MOL005001 | GC77 | GAN CAO | 2a4z_v | 0.9099 | PK3CG_HUMAN | PIK3CG   |
| MOL005001 | GC77 | GAN CAO | 1v3q_v | 0.9546 | PNPH_HUMAN  | PNP      |
| MOL005001 | GC77 | GAN CAO | 1wbo_v | 0.9954 | Q16539      | MAPK14   |
| MOL005001 | GC77 | GAN CAO | 1z68_v | 0.984  | SEPR_HUMAN  | FAP      |
| MOL005001 | GC77 | GAN CAO | 1p49_v | 0.9681 | STS_HUMAN   | STS      |
| MOL005001 | GC77 | GAN CAO | 1no9_v | 0.9653 | THRB_HUMAN  | F2       |
| MOL005001 | GC77 | GAN CAO | 1dvz_v | 0.9788 | TTHY_HUMAN  | TTR      |
| MOL005003 | GC78 | GAN CAO | 1e7e_v | 0.9684 | ALBU_HUMAN  | ALB      |
| MOL005003 | GC78 | GAN CAO | 2pir_v | 0.9434 | ANDR_HUMAN  | AR       |
| MOL005003 | GC78 | GAN CAO | 1oj9_v | 0.9707 | AOFB_HUMAN  | MAOB     |
| MOL005003 | GC78 | GAN CAO | 116l_v | 0.9254 | APOA2_HUMAN | APOA2    |
| MOL005003 | GC78 | GAN CAO | 1reu_v | 0.9681 | BMP2_HUMAN  | BMP2     |
| MOL005003 | GC78 | GAN CAO | 1if4_v | 0.9801 | CAH2_HUMAN  | CA2      |
| MOL005003 | GC78 | GAN CAO | 1shj_v | 0.9277 | CASP7_HUMAN | CASP7    |
| MOL005003 | GC78 | GAN CAO | 1rs0_v | 0.9547 | CFAB_HUMAN  | CFB      |
| MOL005003 | GC78 | GAN CAO | 2br1_v | 0.9563 | CHK1_HUMAN  | CHEK1    |
| MOL005003 | GC78 | GAN CAO | 2ocf_v | 0.9177 | ESR1_HUMAN  | ESR1     |
| MOL005003 | GC78 | GAN CAO | 1ya8_v | 0.9336 | EST1_HUMAN  | CES1     |
| MOL005003 | GC78 | GAN CAO | 2pg2_v | 0.9837 | KIF11_HUMAN | KIF11    |
| MOL005003 | GC78 | GAN CAO | 1pme_v | 0.9798 | MK01_HUMAN  | MAPK1    |
| MOL005003 | GC78 | GAN CAO | 1uki_v | 0.9796 | MK08_HUMAN  | MAPK8    |
| MOL005003 | GC78 | GAN CAO | 1pmv_v | 0.9563 | MK10_HUMAN  | MAPK10   |
| MOL005003 | GC78 | GAN CAO | 1eub_v | 0.9824 | MMP13_HUMAN | MMP13    |
| MOL005003 | GC78 | GAN CAO | 1bm6_v | 0.9248 | MMP3_HUMAN  | MMP3     |
| MOL005003 | GC78 | GAN CAO | 1le6_v | 0.9295 | O15496      | PLA2G10  |
| MOL005003 | GC78 | GAN CAO | 2pin_v | 0.9211 | P10828      | THRB     |
| MOL005003 | GC78 | GAN CAO | 3bgp_v | 0.9866 | P11309      | PIM1     |
| MOL005003 | GC78 | GAN CAO | 1jvp_v | 0.9544 | P24941      | CDK2     |
| MOL005003 | GC78 | GAN CAO | 2p3g_v | 0.9887 | P49137      | 4APKAPK2 |
| MOL005003 | GC78 | GAN CAO | 1udu_v | 0.9694 | PDE5A_HUMAN | PDE5A    |
| MOL005003 | GC78 | GAN CAO | 2a4z_v | 0.9803 | PK3CG_HUMAN | PIK3CG   |
| MOL005003 | GC78 | GAN CAO | 1zgy_v | 0.9356 | PPARG_HUMAN | PPARG    |
| MOL005003 | GC78 | GAN CAO | 1p49_v | 0.9483 | STS_HUMAN   | STS      |

|           |      |         |        |        |             |          |
|-----------|------|---------|--------|--------|-------------|----------|
| MOL005003 | GC78 | GAN CAO | 1dvz_v | 0.9651 | TTHY_HUMAN  | TTR      |
| MOL005007 | GC79 | GAN CAO | 1j96_v | 0.9613 | AK1C2_HUMAN | AKR1C2   |
| MOL005007 | GC79 | GAN CAO | 1e7a_v | 0.9013 | ALBU_HUMAN  | ALB      |
| MOL005007 | GC79 | GAN CAO | 1oj9_v | 0.9787 | AOFB_HUMAN  | MAOB     |
| MOL005007 | GC79 | GAN CAO | 2ohp_v | 0.9882 | BACE1_HUMAN | BACE1    |
| MOL005007 | GC79 | GAN CAO | 1reu_v | 0.9067 | BMP2_HUMAN  | BMP2     |
| MOL005007 | GC79 | GAN CAO | 1if4_v | 0.9594 | CAH2_HUMAN  | CA2      |
| MOL005007 | GC79 | GAN CAO | 1shj_v | 0.9248 | CASP7_HUMAN | CASP7    |
| MOL005007 | GC79 | GAN CAO | 1rs0_v | 0.9461 | CFAB_HUMAN  | CFB      |
| MOL005007 | GC79 | GAN CAO | 1xlu_v | 0.9574 | CHLE_HUMAN  | BCHE     |
| MOL005007 | GC79 | GAN CAO | 2vwu_v | 0.947  | EPHB4_HUMAN | EPHB4    |
| MOL005007 | GC79 | GAN CAO | 1qku_v | 0.9232 | ESR1_HUMAN  | ESR1     |
| MOL005007 | GC79 | GAN CAO | 1ogs_v | 0.9219 | GLCM_HUMAN  | GBA      |
| MOL005007 | GC79 | GAN CAO | 1md3_v | 0.9119 | GSTP1_HUMAN | GSTP1    |
| MOL005007 | GC79 | GAN CAO | 2q2y_v | 0.9403 | KIF11_HUMAN | KIF11    |
| MOL005007 | GC79 | GAN CAO | 1uki_v | 0.965  | MK08_HUMAN  | MAPK8    |
| MOL005007 | GC79 | GAN CAO | 3cgf_v | 0.9675 | MK10_HUMAN  | MAPK10   |
| MOL005007 | GC79 | GAN CAO | 3bgp_v | 0.9834 | P11309      | PIM1     |
| MOL005007 | GC79 | GAN CAO | 3cjf_v | 0.9675 | P35968      | KDR      |
| MOL005007 | GC79 | GAN CAO | 1w8l_v | 0.9653 | P62937      | PPIA     |
| MOL005007 | GC79 | GAN CAO | 2a4z_v | 0.9345 | PK3CG_HUMAN | PIK3CG   |
| MOL005007 | GC79 | GAN CAO | 1no9_v | 0.9357 | THRB_HUMAN  | F2       |
| MOL000392 | GC8  | GAN CAO | 1x7r_v | 0.9884 | ESR1_HUMAN  | ESR1     |
| MOL000392 | GC8  | GAN CAO | 2jj3_v | 0.9486 | ESR2_HUMAN  | ESR2     |
| MOL005008 | GC80 | GAN CAO | 1j96_v | 0.9061 | AK1C2_HUMAN | AKR1C2   |
| MOL005008 | GC80 | GAN CAO | 2pix_v | 0.9269 | ANDR_HUMAN  | AR       |
| MOL005008 | GC80 | GAN CAO | 1oj9_v | 1      | AOFB_HUMAN  | MAOB     |
| MOL005008 | GC80 | GAN CAO | 2ohp_v | 0.9067 | BACE1_HUMAN | BACE1    |
| MOL005008 | GC80 | GAN CAO | 1reu_v | 0.9425 | BMP2_HUMAN  | BMP2     |
| MOL005008 | GC80 | GAN CAO | 1czm_v | 0.9367 | CAH1_HUMAN  | CA1      |
| MOL005008 | GC80 | GAN CAO | 1if8_v | 0.9924 | CAH2_HUMAN  | CA2      |
| MOL005008 | GC80 | GAN CAO | 1gfw_v | 0.94   | CASP3_HUMAN | CASP3    |
| MOL005008 | GC80 | GAN CAO | 1shj_v | 1      | CASP7_HUMAN | CASP7    |
| MOL005008 | GC80 | GAN CAO | 1rs0_v | 0.9772 | CFAB_HUMAN  | CFB      |
| MOL005008 | GC80 | GAN CAO | 1p0i_v | 0.9595 | CHLE_HUMAN  | BCHE     |
| MOL005008 | GC80 | GAN CAO | 1yb1_v | 0.9906 | DHB11_HUMAN | HSD17B11 |
| MOL005008 | GC80 | GAN CAO | 2itx_v | 0.938  | EGFR_HUMAN  | EGFR     |
| MOL005008 | GC80 | GAN CAO | 2i0j_v | 0.9935 | ESR1_HUMAN  | ESR1     |
| MOL005008 | GC80 | GAN CAO | 2hck_v | 0.9944 | HCK_HUMAN   | HCK      |
| MOL005008 | GC80 | GAN CAO | 1uki_v | 0.9994 | MK08_HUMAN  | MAPK8    |
| MOL005008 | GC80 | GAN CAO | 1pmv_v | 0.9961 | MK10_HUMAN  | MAPK10   |
| MOL005008 | GC80 | GAN CAO | 1bm6_v | 0.9821 | MMP3_HUMAN  | MMP3     |

|           |      |         |        |        |             |          |
|-----------|------|---------|--------|--------|-------------|----------|
| MOL005008 | GC80 | GAN CAO | 2obj_v | 0.9331 | P11309      | PIM1     |
| MOL005008 | GC80 | GAN CAO | 3eqm_v | 0.9287 | P11511      | CYP19A1  |
| MOL005008 | GC80 | GAN CAO | 2vth_v | 0.9508 | P24941      | CDK2     |
| MOL005008 | GC80 | GAN CAO | 2p3g_v | 0.9741 | P49137      | 1APKAPK2 |
| MOL005008 | GC80 | GAN CAO | 1w8m_v | 0.942  | P62937      | PPIA     |
| MOL005008 | GC80 | GAN CAO | 2j7x_v | 0.9351 | Q62986      | Esr2     |
| MOL005008 | GC80 | GAN CAO | 1no9_v | 0.9719 | THRB_HUMAN  | F2       |
| MOL005008 | GC80 | GAN CAO | 1dvz_v | 0.9482 | TTHY_HUMAN  | TTR      |
| MOL005012 | GC81 | GAN CAO | 1e7e_v | 0.9447 | ALBU_HUMAN  | ALB      |
| MOL005012 | GC81 | GAN CAO | 1xow_v | 0.9665 | ANDR_HUMAN  | AR       |
| MOL005012 | GC81 | GAN CAO | 116l_v | 0.9419 | APOA2_HUMAN | APOA2    |
| MOL005012 | GC81 | GAN CAO | 2ohp_v | 0.9787 | BACE1_HUMAN | BACE1    |
| MOL005012 | GC81 | GAN CAO | 3bmp_v | 0.9758 | BMP2_HUMAN  | BMP2     |
| MOL005012 | GC81 | GAN CAO | 1czm_v | 0.9629 | CAH1_HUMAN  | CA1      |
| MOL005012 | GC81 | GAN CAO | 1xlu_v | 0.9627 | CHLE_HUMAN  | BCHE     |
| MOL005012 | GC81 | GAN CAO | 1qku_v | 0.9047 | ESR1_HUMAN  | ESR1     |
| MOL005012 | GC81 | GAN CAO | 2i0g_v | 0.9463 | ESR2_HUMAN  | ESR2     |
| MOL005012 | GC81 | GAN CAO | 1yxx_v | 0.9916 | PIM1_HUMAN  | PIM1     |
| MOL005012 | GC81 | GAN CAO | 1w7h_v | 0.9548 | Q16539      | MAPK14   |
| MOL005012 | GC81 | GAN CAO | 1p49_v | 0.9634 | STS_HUMAN   | STS      |
| MOL005013 | GC82 | GAN CAO | 1j96_v | 1      | AK1C2_HUMAN | AKR1C2   |
| MOL005013 | GC82 | GAN CAO | 1e7e_v | 0.9779 | ALBU_HUMAN  | ALB      |
| MOL005013 | GC82 | GAN CAO | 2pio_v | 0.9642 | ANDR_HUMAN  | AR       |
| MOL005013 | GC82 | GAN CAO | 1oj9_v | 0.9265 | AOFB_HUMAN  | MAOB     |
| MOL005013 | GC82 | GAN CAO | 116l_v | 0.9943 | APOA2_HUMAN | APOA2    |
| MOL005013 | GC82 | GAN CAO | 2ohp_v | 0.9931 | BACE1_HUMAN | BACE1    |
| MOL005013 | GC82 | GAN CAO | 1reu_v | 1      | BMP2_HUMAN  | BMP2     |
| MOL005013 | GC82 | GAN CAO | 1rs0_v | 0.983  | CFAB_HUMAN  | CFB      |
| MOL005013 | GC82 | GAN CAO | 1p0i_v | 0.9223 | CHLE_HUMAN  | BCHE     |
| MOL005013 | GC82 | GAN CAO | 3czt_v | 0.9445 | DH11_HUMAN  | HSD11B1  |
| MOL005013 | GC82 | GAN CAO | 1qku_v | 0.9731 | ESR1_HUMAN  | ESR1     |
| MOL005013 | GC82 | GAN CAO | 2pg2_v | 0.9115 | KIF11_HUMAN | KIF11    |
| MOL005013 | GC82 | GAN CAO | 1uki_v | 0.9385 | MK08_HUMAN  | MAPK8    |
| MOL005013 | GC82 | GAN CAO | 1pmv_v | 0.9919 | MK10_HUMAN  | MAPK10   |
| MOL005013 | GC82 | GAN CAO | 1eub_v | 0.9093 | MMP13_HUMAN | MMP13    |
| MOL005013 | GC82 | GAN CAO | 1bm6_v | 0.9445 | MMP3_HUMAN  | MMP3     |
| MOL005013 | GC82 | GAN CAO | 3dd8_v | 0.9436 | P00918      | CA2      |
| MOL005013 | GC82 | GAN CAO | 2pin_v | 0.9561 | P10828      | THRB     |
| MOL005013 | GC82 | GAN CAO | 3bgp_v | 1      | P11309      | PIM1     |
| MOL005013 | GC82 | GAN CAO | 2p3g_v | 0.9945 | P49137      | 1APKAPK2 |
| MOL005013 | GC82 | GAN CAO | 1w8l_v | 0.9385 | P62937      | PPIA     |
| MOL005013 | GC82 | GAN CAO | 1hd2_v | 0.9347 | PRDX5_HUMAN | PRDX5    |



|           |      |         |        |        |             |         |
|-----------|------|---------|--------|--------|-------------|---------|
| MOL005013 | GC82 | GAN CAO | 1p49_v | 1      | STS_HUMAN   | STS     |
| MOL005013 | GC82 | GAN CAO | 1no9_v | 0.9852 | THRB_HUMAN  | F2      |
| MOL005013 | GC82 | GAN CAO | 1ijn_v | 0.9889 | TTHY_HUMAN  | TTR     |
| MOL005013 | GC82 | GAN CAO | 1j78_v | 0.9212 | VTDB_HUMAN  | GC      |
| MOL005016 | GC83 | GAN CAO | 2pio_v | 0.9552 | ANDR_HUMAN  | AR      |
| MOL005016 | GC83 | GAN CAO | 2ohp_v | 0.9335 | BACE1_HUMAN | BACE1   |
| MOL005016 | GC83 | GAN CAO | 1oq5_v | 0.9694 | CAH2_HUMAN  | CA2     |
| MOL005016 | GC83 | GAN CAO | 1h1p_v | 0.9143 | CCNA2_HUMAN | CCNA2   |
| MOL005016 | GC83 | GAN CAO | 1xlv_v | 0.986  | CHLE_HUMAN  | BCHE    |
| MOL005016 | GC83 | GAN CAO | 1x7r_v | 0.9795 | ESR1_HUMAN  | ESR1    |
| MOL005016 | GC83 | GAN CAO | 1x7j_v | 0.9881 | ESR2_HUMAN  | ESR2    |
| MOL005016 | GC83 | GAN CAO | 1ogs_v | 0.9318 | GLCM_HUMAN  | GBA     |
| MOL005016 | GC83 | GAN CAO | 1uki_v | 0.974  | MK08_HUMAN  | MAPK8   |
| MOL005016 | GC83 | GAN CAO | 1pmv_v | 0.9554 | MK10_HUMAN  | MAPK10  |
| MOL005016 | GC83 | GAN CAO | 1bm6_v | 0.9752 | MMP3_HUMAN  | MMP3    |
| MOL005016 | GC83 | GAN CAO | 1pq9_v | 0.9787 | NR1H2_HUMAN | NR1H2   |
| MOL005016 | GC83 | GAN CAO | 3eqm_v | 0.967  | P11511      | CYP19A1 |
| MOL005016 | GC83 | GAN CAO | 1w8m_v | 0.9636 | P62937      | PPIA    |
| MOL005016 | GC83 | GAN CAO | 1yxx_v | 0.9656 | PIM1_HUMAN  | PIM1    |
| MOL005016 | GC83 | GAN CAO | 1zuc_v | 0.9042 | PRGR_HUMAN  | PGR     |
| MOL005016 | GC83 | GAN CAO | 2afu_v | 0.9457 | QPCT_HUMAN  | QPCT    |
| MOL005016 | GC83 | GAN CAO | 1z68_v | 0.9798 | SEPR_HUMAN  | FAP     |
| MOL005016 | GC83 | GAN CAO | 1dvz_v | 0.9614 | TTHY_HUMAN  | TTR     |
| MOL005017 | GC84 | GAN CAO | 2oi0_v | 0.916  | ADA17_HUMAN | ADAM17  |
| MOL005017 | GC84 | GAN CAO | 1e7a_v | 1      | ALBU_HUMAN  | ALB     |
| MOL005017 | GC84 | GAN CAO | 2pir_v | 0.9078 | ANDR_HUMAN  | AR      |
| MOL005017 | GC84 | GAN CAO | 1oj9_v | 1      | AOFB_HUMAN  | MAOB    |
| MOL005017 | GC84 | GAN CAO | 1l6l_v | 1      | APOA2_HUMAN | APOA2   |
| MOL005017 | GC84 | GAN CAO | 2ohp_v | 0.9651 | BACE1_HUMAN | BACE1   |
| MOL005017 | GC84 | GAN CAO | 1if4_v | 0.9818 | CAH2_HUMAN  | CA2     |
| MOL005017 | GC84 | GAN CAO | 1shj_v | 1      | CASP7_HUMAN | CASP7   |
| MOL005017 | GC84 | GAN CAO | 1unh_v | 0.9764 | CD5R1_HUMAN | CDK5R1  |
| MOL005017 | GC84 | GAN CAO | 1rs0_v | 0.9964 | CFAB_HUMAN  | CFB     |
| MOL005017 | GC84 | GAN CAO | 2ocf_v | 0.9988 | ESR1_HUMAN  | ESR1    |
| MOL005017 | GC84 | GAN CAO | 2jj3_v | 0.9744 | ESR2_HUMAN  | ESR2    |
| MOL005017 | GC84 | GAN CAO | 1ya8_v | 0.9881 | EST1_HUMAN  | CES1    |
| MOL005017 | GC84 | GAN CAO | 2fky_v | 1      | KIF11_HUMAN | KIF11   |
| MOL005017 | GC84 | GAN CAO | 1pme_v | 1      | MK01_HUMAN  | MAPK1   |
| MOL005017 | GC84 | GAN CAO | 1uki_v | 0.9904 | MK08_HUMAN  | MAPK8   |
| MOL005017 | GC84 | GAN CAO | 3cgf_v | 0.9887 | MK10_HUMAN  | MAPK10  |
| MOL005017 | GC84 | GAN CAO | 830c_v | 0.986  | MMP13_HUMAN | MMP13   |
| MOL005017 | GC84 | GAN CAO | 1bm6_v | 0.9975 | MMP3_HUMAN  | MMP3    |

|           |      |         |        |        |             |          |
|-----------|------|---------|--------|--------|-------------|----------|
| MOL005017 | GC84 | GAN CAO | 1le6_v | 0.9114 | O15496      | PLA2G10  |
| MOL005017 | GC84 | GAN CAO | 3bgb_v | 1      | P11309      | PIM1     |
| MOL005017 | GC84 | GAN CAO | 2b53_v | 0.9983 | P24941      | CDK2     |
| MOL005017 | GC84 | GAN CAO | 3cjf_v | 0.9887 | P35968      | KDR      |
| MOL005017 | GC84 | GAN CAO | 2p3g_v | 1      | P49137      | 1APKAPK2 |
| MOL005017 | GC84 | GAN CAO | 2pe0_v | 0.9831 | PDPK1_HUMAN | PDPK1    |
| MOL005017 | GC84 | GAN CAO | 1ov4_v | 0.942  | Q06520      | SULT2A1  |
| MOL005017 | GC84 | GAN CAO | 1wbo_v | 0.9984 | Q16539      | MAPK14   |
| MOL005017 | GC84 | GAN CAO | 1n83_v | 1      | RORA_HUMAN  | RORA     |
| MOL005017 | GC84 | GAN CAO | 1p49_v | 1      | STS_HUMAN   | STS      |
| MOL005017 | GC84 | GAN CAO | 1no9_v | 0.9846 | THRB_HUMAN  | F2       |
| MOL005017 | GC84 | GAN CAO | 1dvz_v | 0.9912 | TTHY_HUMAN  | TTR      |
| MOL005017 | GC84 | GAN CAO | 1j78_v | 1      | VTDB_HUMAN  | GC       |
| MOL005018 | GC85 | GAN CAO | 1j96_v | 0.9815 | AK1C2_HUMAN | AKR1C2   |
| MOL005018 | GC85 | GAN CAO | 1e7e_v | 0.9555 | ALBU_HUMAN  | ALB      |
| MOL005018 | GC85 | GAN CAO | 1oj9_v | 0.9877 | AOFB_HUMAN  | MAOB     |
| MOL005018 | GC85 | GAN CAO | 1l6l_v | 0.9644 | APOA2_HUMAN | APOA2    |
| MOL005018 | GC85 | GAN CAO | 1reu_v | 0.9548 | BMP2_HUMAN  | BMP2     |
| MOL005018 | GC85 | GAN CAO | 1if4_v | 0.9687 | CAH2_HUMAN  | CA2      |
| MOL005018 | GC85 | GAN CAO | 1shj_v | 0.9872 | CASP7_HUMAN | CASP7    |
| MOL005018 | GC85 | GAN CAO | 2i0j_v | 0.9624 | ESR1_HUMAN  | ESR1     |
| MOL005018 | GC85 | GAN CAO | 2obj_v | 0.9901 | P11309      | PIM1     |
| MOL005018 | GC85 | GAN CAO | 2jbp_v | 0.9924 | P49137      | 1APKAPK2 |
| MOL005018 | GC85 | GAN CAO | 2a4z_v | 0.9557 | PK3CG_HUMAN | PIK3CG   |
| MOL005018 | GC85 | GAN CAO | 1p49_v | 0.9826 | STS_HUMAN   | STS      |
| MOL005020 | GC86 | GAN CAO | 1e7e_v | 0.961  | ALBU_HUMAN  | ALB      |
| MOL005020 | GC86 | GAN CAO | 2ama_v | 0.9214 | ANDR_HUMAN  | AR       |
| MOL005020 | GC86 | GAN CAO | 1oj9_v | 0.9991 | AOFB_HUMAN  | MAOB     |
| MOL005020 | GC86 | GAN CAO | 1l6l_v | 0.9668 | APOA2_HUMAN | APOA2    |
| MOL005020 | GC86 | GAN CAO | 2ohp_v | 0.9543 | BACE1_HUMAN | BACE1    |
| MOL005020 | GC86 | GAN CAO | 1if4_v | 0.9739 | CAH2_HUMAN  | CA2      |
| MOL005020 | GC86 | GAN CAO | 3dej_v | 0.9622 | CASP3_HUMAN | CASP3    |
| MOL005020 | GC86 | GAN CAO | 1shj_v | 0.9775 | CASP7_HUMAN | CASP7    |
| MOL005020 | GC86 | GAN CAO | 1unh_v | 0.9749 | CD5R1_HUMAN | CDK5R1   |
| MOL005020 | GC86 | GAN CAO | 1rs0_v | 0.9804 | CFAB_HUMAN  | CFB      |
| MOL005020 | GC86 | GAN CAO | 2ocf_v | 0.9779 | ESR1_HUMAN  | ESR1     |
| MOL005020 | GC86 | GAN CAO | 1qkm_v | 0.9846 | ESR2_HUMAN  | ESR2     |
| MOL005020 | GC86 | GAN CAO | 1ya8_v | 0.9497 | EST1_HUMAN  | CES1     |
| MOL005020 | GC86 | GAN CAO | 1d7i_v | 0.9288 | FKB1A_HUMAN | FKBP1A   |
| MOL005020 | GC86 | GAN CAO | 2fky_v | 0.924  | KIF11_HUMAN | KIF11    |
| MOL005020 | GC86 | GAN CAO | 1pme_v | 0.994  | MK01_HUMAN  | MAPK1    |
| MOL005020 | GC86 | GAN CAO | 1uki_v | 0.9071 | MK08_HUMAN  | MAPK8    |

|           |      |         |        |        |             |          |
|-----------|------|---------|--------|--------|-------------|----------|
| MOL005020 | GC86 | GAN CAO | 1pmv_v | 0.9015 | MK10_HUMAN  | MAPK10   |
| MOL005020 | GC86 | GAN CAO | 1bm6_v | 0.9417 | MMP3_HUMAN  | MMP3     |
| MOL005020 | GC86 | GAN CAO | 1jvp_v | 0.9055 | P24941      | CDK2     |
| MOL005020 | GC86 | GAN CAO | 2jbp_v | 0.9776 | P49137      | MAPKAPK2 |
| MOL005020 | GC86 | GAN CAO | 1w8l_v | 0.9728 | P62937      | PPIA     |
| MOL005020 | GC86 | GAN CAO | 1udu_v | 0.9186 | PDE5A_HUMAN | PDE5A    |
| MOL005020 | GC86 | GAN CAO | 1yxx_v | 0.9828 | PIM1_HUMAN  | PIM1     |
| MOL005020 | GC86 | GAN CAO | 1wbo_v | 0.9927 | Q16539      | MAPK14   |
| MOL005020 | GC86 | GAN CAO | 1q8m_v | 0.989  | Q9NP99      | TREM1    |
| MOL005020 | GC86 | GAN CAO | 1p49_v | 0.9711 | STS_HUMAN   | STS      |
| MOL005020 | GC86 | GAN CAO | 2roy_v | 0.9429 | TTHY_HUMAN  | TTR      |
| MOL005020 | GC86 | GAN CAO | 1j78_v | 0.9171 | VTDB_HUMAN  | GC       |
| MOL000098 | GC87 | GAN CAO | 1oq5_v | 0.9077 | CAH2_HUMAN  | CA2      |
| MOL000098 | GC87 | GAN CAO | 1p0i_v | 0.9492 | CHLE_HUMAN  | BCHE     |
| MOL000098 | GC87 | GAN CAO | 2itx_v | 0.9333 | EGFR_HUMAN  | EGFR     |
| MOL000098 | GC87 | GAN CAO | 2i0j_v | 0.9615 | ESR1_HUMAN  | ESR1     |
| MOL000098 | GC87 | GAN CAO | 2hck_v | 0.9854 | HCK_HUMAN   | HCK      |
| MOL000098 | GC87 | GAN CAO | 2o63_v | 0.989  | PIM1_HUMAN  | PIM1     |
| MOL000098 | GC87 | GAN CAO | 1zuc_v | 0.9356 | PRGR_HUMAN  | PGR      |
| MOL000098 | GC87 | GAN CAO | 1no9_v | 0.9491 | THRB_HUMAN  | F2       |
| MOL000098 | GC87 | GAN CAO | 1dvz_v | 0.9264 | TTHY_HUMAN  | TTR      |
| MOL000497 | GC88 | GAN CAO | 1j96_v | 0.9992 | AK1C2_HUMAN | AKR1C2   |
| MOL000497 | GC88 | GAN CAO | 1xf0_v | 0.9478 | AK1C3_HUMAN | AKR1C3   |
| MOL000497 | GC88 | GAN CAO | 1xj7_v | 0.9697 | ANDR_HUMAN  | AR       |
| MOL000497 | GC88 | GAN CAO | 1gfw_v | 0.9196 | CASP3_HUMAN | CASP3    |
| MOL000497 | GC88 | GAN CAO | 1unh_v | 0.908  | CD5R1_HUMAN | CDK5R1   |
| MOL000497 | GC88 | GAN CAO | 2vwu_v | 0.9674 | EPHB4_HUMAN | EPHB4    |
| MOL000497 | GC88 | GAN CAO | 1qku_v | 0.9615 | ESR1_HUMAN  | ESR1     |
| MOL000497 | GC88 | GAN CAO | 2jj3_v | 0.9102 | ESR2_HUMAN  | ESR2     |
| MOL000497 | GC88 | GAN CAO | 3dcw_v | 0.9682 | P00918      | CA2      |
| MOL000497 | GC88 | GAN CAO | 2obj_v | 0.967  | P11309      | PIM1     |
| MOL000497 | GC88 | GAN CAO | 3eqm_v | 0.949  | P11511      | CYP19A1  |
| MOL000497 | GC88 | GAN CAO | 1wbo_v | 0.9631 | Q16539      | MAPK14   |
| MOL000497 | GC88 | GAN CAO | 1q8m_v | 0.9863 | Q9NP99      | TREM1    |
| MOL001484 | GC89 | GAN CAO | 1e7e_v | 0.9523 | ALBU_HUMAN  | ALB      |
| MOL001484 | GC89 | GAN CAO | 2pir_v | 0.9579 | ANDR_HUMAN  | AR       |
| MOL001484 | GC89 | GAN CAO | 1l6l_v | 0.9728 | APOA2_HUMAN | APOA2    |
| MOL001484 | GC89 | GAN CAO | 1reu_v | 0.9729 | BMP2_HUMAN  | BMP2     |
| MOL001484 | GC89 | GAN CAO | 1if4_v | 0.9187 | CAH2_HUMAN  | CA2      |
| MOL001484 | GC89 | GAN CAO | 1vec_v | 0.9772 | DDX6_HUMAN  | DDX6     |
| MOL001484 | GC89 | GAN CAO | 1qku_v | 0.961  | ESR1_HUMAN  | ESR1     |
| MOL001484 | GC89 | GAN CAO | 1md3_v | 0.9676 | GSTP1_HUMAN | GSTP1    |

|           |      |              |        |        |             |        |
|-----------|------|--------------|--------|--------|-------------|--------|
| MOL001484 | GC89 | GAN CAO      | 2obj_v | 0.9527 | P11309      | PIM1   |
| MOL001484 | GC89 | GAN CAO      | 1w8m_v | 0.9128 | P62937      | PPIA   |
| MOL001484 | GC89 | GAN CAO      | 2a4z_v | 0.9077 | PK3CG_HUMAN | PIK3CG |
| MOL001484 | GC89 | GAN CAO      | 1p49_v | 0.9964 | STS_HUMAN   | STS    |
| MOL000417 | GC9  | GAN CAO      | 1zh9_v | 0.9057 | CAH2_HUMAN  | CA2    |
| MOL000417 | GC9  | GAN CAO      | 2i0j_v | 0.9957 | ESR1_HUMAN  | ESR1   |
| MOL000417 | GC9  | GAN CAO      | 2jj3_v | 0.9708 | ESR2_HUMAN  | ESR2   |
| MOL000417 | GC9  | GAN CAO      | 1yxx_v | 0.9099 | PIM1_HUMAN  | PIM1   |
| MOL000417 | GC9  | GAN CAO      | 1z68_v | 0.9579 | SEPR_HUMAN  | FAP    |
| MOL001792 | GC90 | GAN CAO      | 1xo2_v | 0.9084 | CDK6_HUMAN  | CDK6   |
| MOL001792 | GC90 | GAN CAO      | 2i0j_v | 0.9539 | ESR1_HUMAN  | ESR1   |
| MOL001792 | GC90 | GAN CAO      | 1yxx_v | 0.9627 | PIM1_HUMAN  | PIM1   |
| MOL001792 | GC90 | GAN CAO      | 1no9_v | 0.9173 | THRB_HUMAN  | F2     |
| MOL002464 | GJ1  | GAN<br>JIANG | 1j96_v | 0.994  | AK1C2_HUMAN | AKR1C2 |
| MOL002464 | GJ1  | GAN<br>JIANG | 1e7a_v | 0.9989 | ALBU_HUMAN  | ALB    |
| MOL002464 | GJ1  | GAN<br>JIANG | 1oj9_v | 0.9965 | AOFB_HUMAN  | MAOB   |
| MOL002464 | GJ1  | GAN<br>JIANG | 1l6l_v | 0.9764 | APOA2_HUMAN | APOA2  |
| MOL002464 | GJ1  | GAN<br>JIANG | 2q11_v | 0.9562 | BACE1_HUMAN | BACE1  |
| MOL002464 | GJ1  | GAN<br>JIANG | 1reu_v | 0.9999 | BMP2_HUMAN  | BMP2   |
| MOL002464 | GJ1  | GAN<br>JIANG | 1jd0_v | 0.9409 | CAH12_HUMAN | CA12   |
| MOL002464 | GJ1  | GAN<br>JIANG | 1shj_v | 0.9937 | CASP7_HUMAN | CASP7  |
| MOL002464 | GJ1  | GAN<br>JIANG | 2f1g_v | 0.948  | CATS_HUMAN  | CTSS   |
| MOL002464 | GJ1  | GAN<br>JIANG | 2uzd_v | 0.9449 | CCNA2_HUMAN | CCNA2  |
| MOL002464 | GJ1  | GAN<br>JIANG | 1rs0_v | 0.9306 | CFAB_HUMAN  | CFB    |
| MOL002464 | GJ1  | GAN<br>JIANG | 2cgw_v | 0.9733 | CHK1_HUMAN  | CHEK1  |
| MOL002464 | GJ1  | GAN<br>JIANG | 1xlu_v | 0.9726 | CHLE_HUMAN  | BCHE   |
| MOL002464 | GJ1  | GAN<br>JIANG | 1vec_v | 0.9657 | DDX6_HUMAN  | DDX6   |
| MOL002464 | GJ1  | GAN<br>JIANG | 1qkt_v | 0.9115 | ESR1_HUMAN  | ESR1   |
| MOL002464 | GJ1  | GAN<br>JIANG | 1f40_v | 0.9661 | FKB1A_HUMAN | FKBP1A |
| MOL002464 | GJ1  | GAN<br>JIANG | 1md3_v | 0.9578 | GSTP1_HUMAN | GSTP1  |
| MOL002464 | GJ1  | GAN<br>JIANG | 2pg2_v | 0.9763 | KIF11_HUMAN | KIF11  |

|           |     |              |        |        |             |          |
|-----------|-----|--------------|--------|--------|-------------|----------|
| MOL002464 | GJ1 | GAN<br>JIANG | 1pme_v | 0.9957 | MK01_HUMAN  | MAPK1    |
| MOL002464 | GJ1 | GAN<br>JIANG | 2gmx_v | 0.94   | MK08_HUMAN  | MAPK8    |
| MOL002464 | GJ1 | GAN<br>JIANG | 1eub_v | 0.9702 | MMP13_HUMAN | MMP13    |
| MOL002464 | GJ1 | GAN<br>JIANG | 1pq9_v | 0.9436 | NR1H2_HUMAN | NR1H2    |
| MOL002464 | GJ1 | GAN<br>JIANG | 3dbu_v | 0.9789 | P00918      | CA2      |
| MOL002464 | GJ1 | GAN<br>JIANG | 2pin_v | 0.9905 | P10828      | THRB     |
| MOL002464 | GJ1 | GAN<br>JIANG | 3bgp_v | 0.9879 | P11309      | PIM1     |
| MOL002464 | GJ1 | GAN<br>JIANG | 1e1x_v | 0.9567 | P24941      | CDK2     |
| MOL002464 | GJ1 | GAN<br>JIANG | 2jbp_v | 0.9984 | P49137      | 1APKAPK2 |
| MOL002464 | GJ1 | GAN<br>JIANG | 1w8l_v | 0.9889 | P62937      | PPIA     |
| MOL002464 | GJ1 | GAN<br>JIANG | 1xn0_v | 0.9221 | PDE4B_HUMAN | PDE4B    |
| MOL002464 | GJ1 | GAN<br>JIANG | 1zgy_v | 0.9794 | PPARG_HUMAN | PPARG    |
| MOL002464 | GJ1 | GAN<br>JIANG | 1p49_v | 0.9896 | STS_HUMAN   | STS      |
| MOL002464 | GJ1 | GAN<br>JIANG | 1m9z_v | 0.9562 | TGFR2_HUMAN | TGFBR2   |
| MOL002464 | GJ1 | GAN<br>JIANG | 1dvz_v | 0.9829 | TTHY_HUMAN  | TTR      |
| MOL002464 | GJ1 | GAN<br>JIANG | 1j78_v | 0.9123 | VTDB_HUMAN  | GC       |
| MOL002501 | GJ2 | GAN<br>JIANG | 1j96_v | 0.9996 | AK1C2_HUMAN | AKR1C2   |
| MOL002501 | GJ2 | GAN<br>JIANG | 1xf0_v | 0.928  | AK1C3_HUMAN | AKR1C3   |
| MOL002501 | GJ2 | GAN<br>JIANG | 1e7e_v | 0.9421 | ALBU_HUMAN  | ALB      |
| MOL002501 | GJ2 | GAN<br>JIANG | 2agt_v | 0.9333 | ALDR_HUMAN  | AKR1B1   |
| MOL002501 | GJ2 | GAN<br>JIANG | 1xj7_v | 0.9678 | ANDR_HUMAN  | AR       |
| MOL002501 | GJ2 | GAN<br>JIANG | 1oj9_v | 0.9834 | AOFB_HUMAN  | MAOB     |
| MOL002501 | GJ2 | GAN<br>JIANG | 1l6l_v | 0.9464 | APOA2_HUMAN | APOA2    |
| MOL002501 | GJ2 | GAN<br>JIANG | 1reu_v | 0.9615 | BMP2_HUMAN  | BMP2     |
| MOL002501 | GJ2 | GAN<br>JIANG | 1okl_v | 0.9607 | CAH2_HUMAN  | CA2      |
| MOL002501 | GJ2 | GAN<br>JIANG | 1shj_v | 0.9266 | CASP7_HUMAN | CASP7    |

|           |     |              |        |        |             |          |
|-----------|-----|--------------|--------|--------|-------------|----------|
| MOL002501 | GJ2 | GAN<br>JIANG | 1lyw_v | 0.9233 | CATD_HUMAN  | CTSD     |
| MOL002501 | GJ2 | GAN<br>JIANG | 1rs0_v | 0.9993 | CFAB_HUMAN  | CFB      |
| MOL002501 | GJ2 | GAN<br>JIANG | 1p0i_v | 0.9467 | CHLE_HUMAN  | BCHE     |
| MOL002501 | GJ2 | GAN<br>JIANG | 1klt_v | 0.9203 | CMA1_HUMAN  | CMA1     |
| MOL002501 | GJ2 | GAN<br>JIANG | 1ya8_v | 0.9221 | EST1_HUMAN  | CES1     |
| MOL002501 | GJ2 | GAN<br>JIANG | 1md3_v | 0.9725 | GSTP1_HUMAN | GSTP1    |
| MOL002501 | GJ2 | GAN<br>JIANG | 1xdd_v | 0.9783 | ITAL_HUMAN  | ITGAL    |
| MOL002501 | GJ2 | GAN<br>JIANG | 2pg2_v | 0.95   | KIF11_HUMAN | KIF11    |
| MOL002501 | GJ2 | GAN<br>JIANG | 1pme_v | 0.9566 | MK01_HUMAN  | MAPK1    |
| MOL002501 | GJ2 | GAN<br>JIANG | 1uki_v | 0.9335 | MK08_HUMAN  | MAPK8    |
| MOL002501 | GJ2 | GAN<br>JIANG | 1pmv_v | 0.9703 | MK10_HUMAN  | MAPK10   |
| MOL002501 | GJ2 | GAN<br>JIANG | 1eub_v | 0.9352 | MMP13_HUMAN | MMP13    |
| MOL002501 | GJ2 | GAN<br>JIANG | 1bm6_v | 0.9789 | MMP3_HUMAN  | MMP3     |
| MOL002501 | GJ2 | GAN<br>JIANG | 1pq9_v | 0.9319 | NR1H2_HUMAN | NR1H2    |
| MOL002501 | GJ2 | GAN<br>JIANG | 3bgp_v | 0.9874 | P11309      | PIM1     |
| MOL002501 | GJ2 | GAN<br>JIANG | 3eqm_v | 0.9509 | P11511      | CYP19A1  |
| MOL002501 | GJ2 | GAN<br>JIANG | 2jbp_v | 0.9711 | P49137      | MAPKAPK2 |
| MOL002501 | GJ2 | GAN<br>JIANG | 1w8l_v | 0.9394 | P62937      | PPIA     |
| MOL002501 | GJ2 | GAN<br>JIANG | 1v3q_v | 0.9985 | PNPH_HUMAN  | PNP      |
| MOL002501 | GJ2 | GAN<br>JIANG | 1zgy_v | 0.9141 | PPARG_HUMAN | PPARG    |
| MOL002501 | GJ2 | GAN<br>JIANG | 1zyj_v | 0.9017 | Q16539      | MAPK14   |
| MOL002501 | GJ2 | GAN<br>JIANG | 1q8m_v | 0.9801 | Q9NP99      | TREM1    |
| MOL002501 | GJ2 | GAN<br>JIANG | 1p49_v | 0.9544 | STS_HUMAN   | STS      |
| MOL002501 | GJ2 | GAN<br>JIANG | 1no9_v | 0.9366 | THRB_HUMAN  | F2       |
| MOL002501 | GJ2 | GAN<br>JIANG | 1dvz_v | 0.9818 | TTHY_HUMAN  | TTR      |
| MOL002501 | GJ2 | GAN<br>JIANG | 1j78_v | 0.9029 | VTDB_HUMAN  | GC       |

|           |     |              |        |        |             |        |
|-----------|-----|--------------|--------|--------|-------------|--------|
| MOL002514 | GJ3 | GAN<br>JIANG | 2osf_v | 0.9358 | CAH2_HUMAN  | CA2    |
| MOL002514 | GJ3 | GAN<br>JIANG | 1xo2_v | 0.9324 | CDK6_HUMAN  | CDK6   |
| MOL002514 | GJ3 | GAN<br>JIANG | 1xlu_v | 0.9311 | CHLE_HUMAN  | BCHE   |
| MOL002514 | GJ3 | GAN<br>JIANG | 2itx_v | 0.9464 | EGFR_HUMAN  | EGFR   |
| MOL002514 | GJ3 | GAN<br>JIANG | 2pog_v | 0.9682 | ESR1_HUMAN  | ESR1   |
| MOL002514 | GJ3 | GAN<br>JIANG | 1ya8_v | 0.9682 | EST1_HUMAN  | CES1   |
| MOL002514 | GJ3 | GAN<br>JIANG | 2hck_v | 0.9929 | HCK_HUMAN   | HCK    |
| MOL002879 | RS1 | REN SHEN     | 1zxc_v | 0.9616 | ADA17_HUMAN | ADAM17 |
| MOL002879 | RS1 | REN SHEN     | 1j96_v | 0.9853 | AK1C2_HUMAN | AKR1C2 |
| MOL002879 | RS1 | REN SHEN     | 1xf0_v | 0.9549 | AK1C3_HUMAN | AKR1C3 |
| MOL002879 | RS1 | REN SHEN     | 1e7e_v | 0.9335 | ALBU_HUMAN  | ALB    |
| MOL002879 | RS1 | REN SHEN     | 1az1_v | 0.9578 | ALDR_HUMAN  | AKR1B1 |
| MOL002879 | RS1 | REN SHEN     | 1xj7_v | 0.9597 | ANDR_HUMAN  | AR     |
| MOL002879 | RS1 | REN SHEN     | 1hak_v | 0.9035 | ANXA5_HUMAN | ANXA5  |
| MOL002879 | RS1 | REN SHEN     | 1oj9_v | 0.9962 | AOFB_HUMAN  | MAOB   |
| MOL002879 | RS1 | REN SHEN     | 1l6l_v | 0.9641 | APOA2_HUMAN | APOA2  |
| MOL002879 | RS1 | REN SHEN     | 3bmp_v | 0.9855 | BMP2_HUMAN  | BMP2   |
| MOL002879 | RS1 | REN SHEN     | 3dej_v | 0.9969 | CASP3_HUMAN | CASP3  |
| MOL002879 | RS1 | REN SHEN     | 1shj_v | 0.9442 | CASP7_HUMAN | CASP7  |
| MOL002879 | RS1 | REN SHEN     | 1csb_v | 0.9424 | CATB_HUMAN  | CTSB   |
| MOL002879 | RS1 | REN SHEN     | 2uzd_v | 0.9752 | CCNA2_HUMAN | CCNA2  |
| MOL002879 | RS1 | REN SHEN     | 1unh_v | 0.9793 | CD5R1_HUMAN | CDK5R1 |
| MOL002879 | RS1 | REN SHEN     | 1rs0_v | 0.965  | CFAB_HUMAN  | CFB    |
| MOL002879 | RS1 | REN SHEN     | 1p0i_v | 0.9891 | CHLE_HUMAN  | BCHE   |
| MOL002879 | RS1 | REN SHEN     | 1klt_v | 0.9698 | CMA1_HUMAN  | CMA1   |
| MOL002879 | RS1 | REN SHEN     | 1vec_v | 0.9873 | DDX6_HUMAN  | DDX6   |
| MOL002879 | RS1 | REN SHEN     | 1m17_v | 0.9351 | EGFR_HUMAN  | EGFR   |
| MOL002879 | RS1 | REN SHEN     | 2ocf_v | 0.9332 | ESR1_HUMAN  | ESR1   |
| MOL002879 | RS1 | REN SHEN     | 1ya8_v | 0.9491 | EST1_HUMAN  | CES1   |
| MOL002879 | RS1 | REN SHEN     | 2j95_v | 0.921  | FA10_HUMAN  | F10    |
| MOL002879 | RS1 | REN SHEN     | 1f40_v | 0.9596 | FKB1A_HUMAN | FKBP1A |
| MOL002879 | RS1 | REN SHEN     | 1lbk_v | 0.975  | GSTP1_HUMAN | GSTP1  |
| MOL002879 | RS1 | REN SHEN     | 2fky_v | 0.9684 | KIF11_HUMAN | KIF11  |
| MOL002879 | RS1 | REN SHEN     | 1pme_v | 0.9588 | MK01_HUMAN  | MAPK1  |
| MOL002879 | RS1 | REN SHEN     | 1uki_v | 0.9898 | MK08_HUMAN  | MAPK8  |
| MOL002879 | RS1 | REN SHEN     | 1pmv_v | 0.9918 | MK10_HUMAN  | MAPK10 |
| MOL002879 | RS1 | REN SHEN     | 1eub_v | 0.96   | MMP13_HUMAN | MMP13  |
| MOL002879 | RS1 | REN SHEN     | 1bm6_v | 0.9951 | MMP3_HUMAN  | MMP3   |

|           |      |          |        |        |             |          |
|-----------|------|----------|--------|--------|-------------|----------|
| MOL002879 | RS1  | REN SHEN | 1pq9_v | 0.9603 | NR1H2_HUMAN | NR1H2    |
| MOL002879 | RS1  | REN SHEN | 3dcw_v | 0.9874 | P00918      | CA2      |
| MOL002879 | RS1  | REN SHEN | 2pin_v | 0.9469 | P10828      | THRB     |
| MOL002879 | RS1  | REN SHEN | 3bgp_v | 0.9887 | P11309      | PIM1     |
| MOL002879 | RS1  | REN SHEN | 3eqm_v | 0.9429 | P11511      | CYP19A1  |
| MOL002879 | RS1  | REN SHEN | 2jbp_v | 0.99   | P49137      | MAPKAPK2 |
| MOL002879 | RS1  | REN SHEN | 1w8m_v | 0.9584 | P62937      | PPIA     |
| MOL002879 | RS1  | REN SHEN | 2ovm_v | 0.9153 | PRGR_HUMAN  | PGR      |
| MOL002879 | RS1  | REN SHEN | 1zyj_v | 0.9388 | Q16539      | MAPK14   |
| MOL002879 | RS1  | REN SHEN | 1q8m_v | 0.9673 | Q9NP99      | TREM1    |
| MOL002879 | RS1  | REN SHEN | 1p49_v | 0.9695 | STS_HUMAN   | STS      |
| MOL002879 | RS1  | REN SHEN | 1no9_v | 0.9345 | THRB_HUMAN  | F2       |
| MOL002879 | RS1  | REN SHEN | 1f86_v | 0.9993 | TTHY_HUMAN  | TTR      |
| MOL005318 | RS10 | REN SHEN | 2pio_v | 0.9718 | ANDR_HUMAN  | AR       |
| MOL005318 | RS10 | REN SHEN | 1v83_v | 0.9759 | B3GA1_HUMAN | B3GAT1   |
| MOL005318 | RS10 | REN SHEN | 2ohp_v | 0.9684 | BACE1_HUMAN | BACE1    |
| MOL005318 | RS10 | REN SHEN | 1bzm_v | 0.9481 | CAH1_HUMAN  | CA1      |
| MOL005318 | RS10 | REN SHEN | 1lyw_v | 0.9487 | CATD_HUMAN  | CTSD     |
| MOL005318 | RS10 | REN SHEN | 2bkz_v | 0.9419 | CCNA2_HUMAN | CCNA2    |
| MOL005318 | RS10 | REN SHEN | 2itx_v | 0.9322 | EGFR_HUMAN  | EGFR     |
| MOL005318 | RS10 | REN SHEN | 1xka_v | 0.9729 | FA10_HUMAN  | F10      |
| MOL005318 | RS10 | REN SHEN | 9jdw_v | 0.9791 | GATM_HUMAN  | GATM     |
| MOL005318 | RS10 | REN SHEN | 1lbk_v | 0.9438 | GSTP1_HUMAN | GSTP1    |
| MOL005318 | RS10 | REN SHEN | 1uki_v | 0.9647 | MK08_HUMAN  | MAPK8    |
| MOL005318 | RS10 | REN SHEN | 1pmv_v | 0.9732 | MK10_HUMAN  | MAPK10   |
| MOL005318 | RS10 | REN SHEN | 1l6m_v | 0.97   | NGAL_HUMAN  | LCN2     |
| MOL005318 | RS10 | REN SHEN | 1pq9_v | 0.9788 | NR1H2_HUMAN | NR1H2    |
| MOL005318 | RS10 | REN SHEN | 1kta_v | 0.9595 | O15382      | BCAT2    |
| MOL005318 | RS10 | REN SHEN | 1gyk_v | 0.9254 | P02743      | APCS     |
| MOL005318 | RS10 | REN SHEN | 1smd_v | 0.957  | P04745      | AMY1A    |
| MOL005318 | RS10 | REN SHEN | 1mkj_v | 0.9759 | P33176      | KIF5B    |
| MOL005318 | RS10 | REN SHEN | 3cjf_v | 0.9698 | P35968      | KDR      |
| MOL005318 | RS10 | REN SHEN | 1oni_v | 0.9984 | P52758      | RIDA     |
| MOL005318 | RS10 | REN SHEN | 1w8m_v | 0.963  | P62937      | PPIA     |
| MOL005318 | RS10 | REN SHEN | 1pjk_v | 0.9324 | P68400      | CSNK2A1  |
| MOL005318 | RS10 | REN SHEN | 1l8l_v | 0.9621 | P78330      | PSPH     |
| MOL005318 | RS10 | REN SHEN | 1v3q_v | 0.9591 | PNPH_HUMAN  | PNP      |
| MOL005318 | RS10 | REN SHEN | 1hd2_v | 0.9926 | PRDX5_HUMAN | PRDX5    |
| MOL005318 | RS10 | REN SHEN | 1q33_v | 0.9136 | Q9BW91      | NUDT9    |
| MOL005318 | RS10 | REN SHEN | 1o4n_v | 0.9505 | SRC_HUMAN   | SRC      |
| MOL005318 | RS10 | REN SHEN | 1no9_v | 0.947  | THRB_HUMAN  | F2       |
| MOL005318 | RS10 | REN SHEN | 1dvz_v | 0.988  | TTHY_HUMAN  | TTR      |



|           |      |          |        |        |             |          |
|-----------|------|----------|--------|--------|-------------|----------|
| MOL005320 | RS11 | REN SHEN | 2oi0_v | 0.9521 | ADA17_HUMAN | ADAM17   |
| MOL005320 | RS11 | REN SHEN | 1j96_v | 0.9939 | AK1C2_HUMAN | AKR1C2   |
| MOL005320 | RS11 | REN SHEN | 1xf0_v | 0.9402 | AK1C3_HUMAN | AKR1C3   |
| MOL005320 | RS11 | REN SHEN | 1e7a_v | 0.9814 | ALBU_HUMAN  | ALB      |
| MOL005320 | RS11 | REN SHEN | 2fzb_v | 0.9664 | ALDR_HUMAN  | AKR1B1   |
| MOL005320 | RS11 | REN SHEN | 1xj7_v | 0.9688 | ANDR_HUMAN  | AR       |
| MOL005320 | RS11 | REN SHEN | 1oj9_v | 0.99   | AOFB_HUMAN  | MAOB     |
| MOL005320 | RS11 | REN SHEN | 1l6l_v | 0.9777 | APOA2_HUMAN | APOA2    |
| MOL005320 | RS11 | REN SHEN | 2q11_v | 0.9218 | BACE1_HUMAN | BACE1    |
| MOL005320 | RS11 | REN SHEN | 3bmp_v | 0.9997 | BMP2_HUMAN  | BMP2     |
| MOL005320 | RS11 | REN SHEN | 2nmx_v | 0.9746 | CAH1_HUMAN  | CA1      |
| MOL005320 | RS11 | REN SHEN | 1oq5_v | 0.9903 | CAH2_HUMAN  | CA2      |
| MOL005320 | RS11 | REN SHEN | 3dej_v | 0.9549 | CASP3_HUMAN | CASP3    |
| MOL005320 | RS11 | REN SHEN | 1shj_v | 0.9824 | CASP7_HUMAN | CASP7    |
| MOL005320 | RS11 | REN SHEN | 1h1p_v | 0.9718 | CCNA2_HUMAN | CCNA2    |
| MOL005320 | RS11 | REN SHEN | 2cgw_v | 0.9475 | CHK1_HUMAN  | CHEK1    |
| MOL005320 | RS11 | REN SHEN | 1xlu_v | 0.9417 | CHLE_HUMAN  | BCHE     |
| MOL005320 | RS11 | REN SHEN | 1yb1_v | 0.9801 | DHB11_HUMAN | HSD17B11 |
| MOL005320 | RS11 | REN SHEN | 2vwu_v | 0.9577 | EPHB4_HUMAN | EPHB4    |
| MOL005320 | RS11 | REN SHEN | 1tow_v | 0.9011 | FABP4_HUMAN | FABP4    |
| MOL005320 | RS11 | REN SHEN | 1f40_v | 0.9312 | FKB1A_HUMAN | FKBP1A   |
| MOL005320 | RS11 | REN SHEN | 1lbk_v | 0.9853 | GSTP1_HUMAN | GSTP1    |
| MOL005320 | RS11 | REN SHEN | 2fky_v | 0.9722 | KIF11_HUMAN | KIF11    |
| MOL005320 | RS11 | REN SHEN | 1pme_v | 0.9965 | MK01_HUMAN  | MAPK1    |
| MOL005320 | RS11 | REN SHEN | 2gmx_v | 0.945  | MK08_HUMAN  | MAPK8    |
| MOL005320 | RS11 | REN SHEN | 3cgf_v | 0.9932 | MK10_HUMAN  | MAPK10   |
| MOL005320 | RS11 | REN SHEN | 1eub_v | 0.9787 | MMP13_HUMAN | MMP13    |
| MOL005320 | RS11 | REN SHEN | 1qq5_v | 0.9588 | NGAL_HUMAN  | LCN2     |
| MOL005320 | RS11 | REN SHEN | 1xv9_v | 0.9303 | NR1I3_HUMAN | NR1I3    |
| MOL005320 | RS11 | REN SHEN | 2pin_v | 0.9717 | P10828      | THRB     |
| MOL005320 | RS11 | REN SHEN | 3eqm_v | 0.9465 | P11511      | CYP19A1  |
| MOL005320 | RS11 | REN SHEN | 1e1x_v | 0.9828 | P24941      | CDK2     |
| MOL005320 | RS11 | REN SHEN | 3cjf_v | 0.9932 | P35968      | KDR      |
| MOL005320 | RS11 | REN SHEN | 2jbo_v | 0.9868 | P49137      | MAPKAPK2 |
| MOL005320 | RS11 | REN SHEN | 1oni_v | 0.9663 | P52758      | RIDA     |
| MOL005320 | RS11 | REN SHEN | 1w8l_v | 0.9691 | P62937      | PPIA     |
| MOL005320 | RS11 | REN SHEN | 2o65_v | 0.9753 | PIM1_HUMAN  | PIM1     |
| MOL005320 | RS11 | REN SHEN | 1zgy_v | 0.9699 | PPARG_HUMAN | PPARG    |
| MOL005320 | RS11 | REN SHEN | 1hd2_v | 0.9631 | PRDX5_HUMAN | PRDX5    |
| MOL005320 | RS11 | REN SHEN | 2ovm_v | 0.9203 | PRGR_HUMAN  | PGR      |
| MOL005320 | RS11 | REN SHEN | 2f6t_v | 0.9938 | PTN1_HUMAN  | PTPN1    |
| MOL005320 | RS11 | REN SHEN | 1bl6_v | 0.9107 | Q16539      | MAPK14   |

|           |      |          |        |        |             |          |
|-----------|------|----------|--------|--------|-------------|----------|
| MOL005320 | RS11 | REN SHEN | 1p49_v | 0.9813 | STS_HUMAN   | STS      |
| MOL005320 | RS11 | REN SHEN | 2roy_v | 0.9878 | TTHY_HUMAN  | TTR      |
| MOL005320 | RS11 | REN SHEN | 1j78_v | 0.923  | VTDB_HUMAN  | GC       |
| MOL005321 | RS12 | REN SHEN | 1uki_v | 0.9425 | MK08_HUMAN  | MAPK8    |
| MOL005321 | RS12 | REN SHEN | 1pmv_v | 0.95   | MK10_HUMAN  | MAPK10   |
| MOL005321 | RS12 | REN SHEN | 1w8m_v | 0.9326 | P62937      | PPIA     |
| MOL005321 | RS12 | REN SHEN | 1q8m_v | 0.9261 | Q9NP99      | TREM1    |
| MOL005344 | RS13 | REN SHEN | 1j96_v | 0.9832 | AK1C2_HUMAN | AKR1C2   |
| MOL005344 | RS13 | REN SHEN | 1xf0_v | 0.9132 | AK1C3_HUMAN | AKR1C3   |
| MOL005344 | RS13 | REN SHEN | 1e7e_v | 0.9908 | ALBU_HUMAN  | ALB      |
| MOL005344 | RS13 | REN SHEN | 1x97_v | 0.9407 | ALDR_HUMAN  | AKR1B1   |
| MOL005344 | RS13 | REN SHEN | 2bk5_v | 0.9626 | AOFB_HUMAN  | MAOB     |
| MOL005344 | RS13 | REN SHEN | 1l6l_v | 0.945  | APOA2_HUMAN | APOA2    |
| MOL005344 | RS13 | REN SHEN | 2ohs_v | 0.9702 | BACE1_HUMAN | BACE1    |
| MOL005344 | RS13 | REN SHEN | 1reu_v | 0.9954 | BMP2_HUMAN  | BMP2     |
| MOL005344 | RS13 | REN SHEN | 1if4_v | 0.9753 | CAH2_HUMAN  | CA2      |
| MOL005344 | RS13 | REN SHEN | 1gfw_v | 0.9566 | CASP3_HUMAN | CASP3    |
| MOL005344 | RS13 | REN SHEN | 1shj_v | 0.9679 | CASP7_HUMAN | CASP7    |
| MOL005344 | RS13 | REN SHEN | 1vyw_v | 0.9898 | CCNA2_HUMAN | CCNA2    |
| MOL005344 | RS13 | REN SHEN | 1rs0_v | 0.9473 | CFAB_HUMAN  | CFB      |
| MOL005344 | RS13 | REN SHEN | 2brb_v | 0.9648 | CHK1_HUMAN  | CHEK1    |
| MOL005344 | RS13 | REN SHEN | 1xlv_v | 0.9657 | CHLE_HUMAN  | BCHE     |
| MOL005344 | RS13 | REN SHEN | 1vec_v | 0.9555 | DDX6_HUMAN  | DDX6     |
| MOL005344 | RS13 | REN SHEN | 1yb1_v | 0.9726 | DHB11_HUMAN | HSD17B11 |
| MOL005344 | RS13 | REN SHEN | 1lbk_v | 0.9905 | GSTP1_HUMAN | GSTP1    |
| MOL005344 | RS13 | REN SHEN | 2hck_v | 0.9673 | HCK_HUMAN   | HCK      |
| MOL005344 | RS13 | REN SHEN | 2pg2_v | 0.9781 | KIF11_HUMAN | KIF11    |
| MOL005344 | RS13 | REN SHEN | 2gmx_v | 0.9397 | MK08_HUMAN  | MAPK8    |
| MOL005344 | RS13 | REN SHEN | 1pmv_v | 0.9928 | MK10_HUMAN  | MAPK10   |
| MOL005344 | RS13 | REN SHEN | 1bm6_v | 0.9228 | MMP3_HUMAN  | MMP3     |
| MOL005344 | RS13 | REN SHEN | 1pq9_v | 0.9519 | NR1H2_HUMAN | NR1H2    |
| MOL005344 | RS13 | REN SHEN | 3eko_v | 0.9461 | P07900      | HSP90AA1 |
| MOL005344 | RS13 | REN SHEN | 2pin_v | 0.9213 | P10828      | THRB     |
| MOL005344 | RS13 | REN SHEN | 2obj_v | 0.9296 | P11309      | PIM1     |
| MOL005344 | RS13 | REN SHEN | 2jbp_v | 0.9315 | P49137      | APKAPK2  |
| MOL005344 | RS13 | REN SHEN | 1w8l_v | 0.9778 | P62937      | PPIA     |
| MOL005344 | RS13 | REN SHEN | 1a28_v | 0.9701 | PRGR_HUMAN  | PGR      |
| MOL005344 | RS13 | REN SHEN | 1cb0_v | 0.9311 | Q13126      | MTAP     |
| MOL005344 | RS13 | REN SHEN | 1q33_v | 0.9524 | Q9BW91      | NUDT9    |
| MOL005344 | RS13 | REN SHEN | 1p49_v | 1      | STS_HUMAN   | STS      |
| MOL005344 | RS13 | REN SHEN | 1f86_v | 0.9499 | TTHY_HUMAN  | TTR      |
| MOL005348 | RS14 | REN SHEN | 1j96_v | 1      | AK1C2_HUMAN | AKR1C2   |

|           |      |          |        |        |             |          |
|-----------|------|----------|--------|--------|-------------|----------|
| MOL005348 | RS14 | REN SHEN | 1e7e_v | 1      | ALBU_HUMAN  | ALB      |
| MOL005348 | RS14 | REN SHEN | 1t63_v | 0.9516 | ANDR_HUMAN  | AR       |
| MOL005348 | RS14 | REN SHEN | 1oj9_v | 1      | AOFB_HUMAN  | MAOB     |
| MOL005348 | RS14 | REN SHEN | 1l6l_v | 1      | APOA2_HUMAN | APOA2    |
| MOL005348 | RS14 | REN SHEN | 2ohp_v | 0.9765 | BACE1_HUMAN | BACE1    |
| MOL005348 | RS14 | REN SHEN | 1reu_v | 1      | BMP2_HUMAN  | BMP2     |
| MOL005348 | RS14 | REN SHEN | 1okl_v | 0.978  | CAH2_HUMAN  | CA2      |
| MOL005348 | RS14 | REN SHEN | 3dej_v | 0.9062 | CASP3_HUMAN | CASP3    |
| MOL005348 | RS14 | REN SHEN | 1shj_v | 0.9654 | CASP7_HUMAN | CASP7    |
| MOL005348 | RS14 | REN SHEN | 1lyw_v | 0.9105 | CATD_HUMAN  | CTSD     |
| MOL005348 | RS14 | REN SHEN | 1rs0_v | 0.9793 | CFAB_HUMAN  | CFB      |
| MOL005348 | RS14 | REN SHEN | 1tg6_v | 0.9777 | CLPP_HUMAN  | CLPP     |
| MOL005348 | RS14 | REN SHEN | 1xdd_v | 0.937  | ITAL_HUMAN  | ITGAL    |
| MOL005348 | RS14 | REN SHEN | 2pg2_v | 1      | KIF11_HUMAN | KIF11    |
| MOL005348 | RS14 | REN SHEN | 1pme_v | 0.98   | MK01_HUMAN  | MAPK1    |
| MOL005348 | RS14 | REN SHEN | 1pmv_v | 0.9965 | MK10_HUMAN  | MAPK10   |
| MOL005348 | RS14 | REN SHEN | 1eub_v | 0.9534 | MMP13_HUMAN | MMP13    |
| MOL005348 | RS14 | REN SHEN | 1bm6_v | 0.9522 | MMP3_HUMAN  | MMP3     |
| MOL005348 | RS14 | REN SHEN | 2pin_v | 1      | P10828      | THRB     |
| MOL005348 | RS14 | REN SHEN | 2p3g_v | 0.9282 | P49137      | 1APKAPK2 |
| MOL005348 | RS14 | REN SHEN | 2pe0_v | 0.9195 | PDPK1_HUMAN | PDPK1    |
| MOL005348 | RS14 | REN SHEN | 2o65_v | 1      | PIM1_HUMAN  | PIM1     |
| MOL005348 | RS14 | REN SHEN | 1v3q_v | 0.9161 | PNPH_HUMAN  | PNP      |
| MOL005348 | RS14 | REN SHEN | 2acl_v | 0.9234 | RXRA_HUMAN  | RXRA     |
| MOL005348 | RS14 | REN SHEN | 1p49_v | 1      | STS_HUMAN   | STS      |
| MOL005348 | RS14 | REN SHEN | 1ijn_v | 0.9533 | TTHY_HUMAN  | TTR      |
| MOL005348 | RS14 | REN SHEN | 1j78_v | 0.978  | VTDB_HUMAN  | GC       |
| MOL005356 | RS15 | REN SHEN | 1j96_v | 0.9616 | AK1C2_HUMAN | AKR1C2   |
| MOL005356 | RS15 | REN SHEN | 1e7a_v | 0.9166 | ALBU_HUMAN  | ALB      |
| MOL005356 | RS15 | REN SHEN | 2ohp_v | 0.9546 | BACE1_HUMAN | BACE1    |
| MOL005356 | RS15 | REN SHEN | 1reu_v | 0.9886 | BMP2_HUMAN  | BMP2     |
| MOL005356 | RS15 | REN SHEN | 1pme_v | 0.9559 | MK01_HUMAN  | MAPK1    |
| MOL005356 | RS15 | REN SHEN | 1eub_v | 0.9577 | MMP13_HUMAN | MMP13    |
| MOL005356 | RS15 | REN SHEN | 3eqm_v | 0.9021 | P11511      | CYP19A1  |
| MOL005356 | RS15 | REN SHEN | 2p3g_v | 0.979  | P49137      | 1APKAPK2 |
| MOL005356 | RS15 | REN SHEN | 2o65_v | 0.9604 | PIM1_HUMAN  | PIM1     |
| MOL005356 | RS15 | REN SHEN | 1p49_v | 0.9251 | STS_HUMAN   | STS      |
| MOL005357 | RS16 | REN SHEN | 1e7a_v | 0.9174 | ALBU_HUMAN  | ALB      |
| MOL005357 | RS16 | REN SHEN | 1reu_v | 0.9587 | BMP2_HUMAN  | BMP2     |
| MOL005357 | RS16 | REN SHEN | 1p0i_v | 0.9265 | CHLE_HUMAN  | BCHE     |
| MOL005357 | RS16 | REN SHEN | 1lbk_v | 0.9646 | GSTP1_HUMAN | GSTP1    |
| MOL005357 | RS16 | REN SHEN | 1uki_v | 0.9595 | MK08_HUMAN  | MAPK8    |

|           |      |          |        |        |             |          |
|-----------|------|----------|--------|--------|-------------|----------|
| MOL005357 | RS16 | REN SHEN | 1pmv_v | 0.9921 | MK10_HUMAN  | MAPK10   |
| MOL005357 | RS16 | REN SHEN | 1eub_v | 0.954  | MMP13_HUMAN | MMP13    |
| MOL005357 | RS16 | REN SHEN | 1bm6_v | 0.958  | MMP3_HUMAN  | MMP3     |
| MOL005357 | RS16 | REN SHEN | 2pin_v | 0.917  | P10828      | THRB     |
| MOL005357 | RS16 | REN SHEN | 3gam_v | 0.97   | P16083      | NQO2     |
| MOL005357 | RS16 | REN SHEN | 1w8l_v | 0.942  | P62937      | PPIA     |
| MOL005357 | RS16 | REN SHEN | 2o65_v | 0.918  | PIM1_HUMAN  | PIM1     |
| MOL005357 | RS16 | REN SHEN | 1v3q_v | 0.9246 | PNPH_HUMAN  | PNP      |
| MOL005357 | RS16 | REN SHEN | 1dvz_v | 0.9355 | TTHY_HUMAN  | TTR      |
| MOL005360 | RS17 | REN SHEN | 1j96_v | 1      | AK1C2_HUMAN | AKR1C2   |
| MOL005360 | RS17 | REN SHEN | 1e7a_v | 1      | ALBU_HUMAN  | ALB      |
| MOL005360 | RS17 | REN SHEN | 1az1_v | 0.917  | ALDR_HUMAN  | AKR1B1   |
| MOL005360 | RS17 | REN SHEN | 2pit_v | 0.9096 | ANDR_HUMAN  | AR       |
| MOL005360 | RS17 | REN SHEN | 1hak_v | 0.9034 | ANXA5_HUMAN | ANXA5    |
| MOL005360 | RS17 | REN SHEN | 1oj9_v | 1      | AOFB_HUMAN  | MAOB     |
| MOL005360 | RS17 | REN SHEN | 2q11_v | 0.996  | BACE1_HUMAN | BACE1    |
| MOL005360 | RS17 | REN SHEN | 1reu_v | 1      | BMP2_HUMAN  | BMP2     |
| MOL005360 | RS17 | REN SHEN | 1czm_v | 0.9827 | CAH1_HUMAN  | CA1      |
| MOL005360 | RS17 | REN SHEN | 1jd0_v | 0.9437 | CAH12_HUMAN | CA12     |
| MOL005360 | RS17 | REN SHEN | 1okl_v | 0.9889 | CAH2_HUMAN  | CA2      |
| MOL005360 | RS17 | REN SHEN | 1rs0_v | 0.9501 | CFAB_HUMAN  | CFB      |
| MOL005360 | RS17 | REN SHEN | 1dic_v | 0.9511 | CFAD_HUMAN  | CFD      |
| MOL005360 | RS17 | REN SHEN | 2brg_v | 0.9567 | CHK1_HUMAN  | CHEK1    |
| MOL005360 | RS17 | REN SHEN | 1xlv_v | 0.9662 | CHLE_HUMAN  | BCHE     |
| MOL005360 | RS17 | REN SHEN | 1vec_v | 0.907  | DDX6_HUMAN  | DDX6     |
| MOL005360 | RS17 | REN SHEN | 2vwu_v | 0.9514 | EPHB4_HUMAN | EPHB4    |
| MOL005360 | RS17 | REN SHEN | 1md3_v | 0.97   | GSTP1_HUMAN | GSTP1    |
| MOL005360 | RS17 | REN SHEN | 2pg2_v | 1      | KIF11_HUMAN | KIF11    |
| MOL005360 | RS17 | REN SHEN | 2h96_v | 0.9576 | MK08_HUMAN  | MAPK8    |
| MOL005360 | RS17 | REN SHEN | 1pmv_v | 0.9691 | MK10_HUMAN  | MAPK10   |
| MOL005360 | RS17 | REN SHEN | 1pq9_v | 0.9262 | NR1H2_HUMAN | NR1H2    |
| MOL005360 | RS17 | REN SHEN | 1le6_v | 0.9317 | O15496      | PLA2G10  |
| MOL005360 | RS17 | REN SHEN | 3bgq_v | 0.9718 | P11309      | PIM1     |
| MOL005360 | RS17 | REN SHEN | 2jbp_v | 0.9853 | P49137      | 4APKAPK2 |
| MOL005360 | RS17 | REN SHEN | 1w8l_v | 0.9772 | P62937      | PPIA     |
| MOL005360 | RS17 | REN SHEN | 1xlz_v | 0.9177 | PDE4B_HUMAN | PDE4B    |
| MOL005360 | RS17 | REN SHEN | 2pe0_v | 0.9421 | PDPK1_HUMAN | PDPK1    |
| MOL005360 | RS17 | REN SHEN | 2a4z_v | 0.9356 | PK3CG_HUMAN | PIK3CG   |
| MOL005360 | RS17 | REN SHEN | 1a28_v | 0.9379 | PRGR_HUMAN  | PGR      |
| MOL005360 | RS17 | REN SHEN | 1j99_v | 0.913  | Q06520      | SULT2A1  |
| MOL005360 | RS17 | REN SHEN | 1w84_v | 0.9462 | Q16539      | MAPK14   |
| MOL005360 | RS17 | REN SHEN | 2afu_v | 0.9633 | QPCT_HUMAN  | QPCT     |

|           |      |          |        |        |             |          |
|-----------|------|----------|--------|--------|-------------|----------|
| MOL005360 | RS17 | REN SHEN | 1p49_v | 1      | STS_HUMAN   | STS      |
| MOL005360 | RS17 | REN SHEN | 1vjy_v | 0.9394 | TGFR1_HUMAN | TGFB1    |
| MOL005360 | RS17 | REN SHEN | 1no9_v | 0.9811 | THRB_HUMAN  | F2       |
| MOL005360 | RS17 | REN SHEN | 1dvz_v | 0.9821 | TTHY_HUMAN  | TTR      |
| MOL005360 | RS17 | REN SHEN | 1j78_v | 0.9716 | VTDB_HUMAN  | GC       |
| MOL005376 | RS18 | REN SHEN | 1j96_v | 0.9988 | AK1C2_HUMAN | AKR1C2   |
| MOL005376 | RS18 | REN SHEN | 1e7a_v | 1      | ALBU_HUMAN  | ALB      |
| MOL005376 | RS18 | REN SHEN | 2pir_v | 0.9607 | ANDR_HUMAN  | AR       |
| MOL005376 | RS18 | REN SHEN | 1oj9_v | 0.9635 | AOFB_HUMAN  | MAOB     |
| MOL005376 | RS18 | REN SHEN | 1reu_v | 1      | BMP2_HUMAN  | BMP2     |
| MOL005376 | RS18 | REN SHEN | 1okl_v | 0.9535 | CAH2_HUMAN  | CA2      |
| MOL005376 | RS18 | REN SHEN | 1shj_v | 0.9874 | CASP7_HUMAN | CASP7    |
| MOL005376 | RS18 | REN SHEN | 1rs0_v | 0.9404 | CFAB_HUMAN  | CFB      |
| MOL005376 | RS18 | REN SHEN | 1ya8_v | 0.9106 | EST1_HUMAN  | CES1     |
| MOL005376 | RS18 | REN SHEN | 2pg2_v | 0.9536 | KIF11_HUMAN | KIF11    |
| MOL005376 | RS18 | REN SHEN | 1pme_v | 0.9502 | MK01_HUMAN  | MAPK1    |
| MOL005376 | RS18 | REN SHEN | 3cgf_v | 0.9633 | MK10_HUMAN  | MAPK10   |
| MOL005376 | RS18 | REN SHEN | 1eub_v | 0.9801 | MMP13_HUMAN | MMP13    |
| MOL005376 | RS18 | REN SHEN | 3bgp_v | 0.9822 | P11309      | PIM1     |
| MOL005376 | RS18 | REN SHEN | 3cjf_v | 0.9633 | P35968      | KDR      |
| MOL005376 | RS18 | REN SHEN | 2p3g_v | 0.9894 | P49137      | APKAPK2  |
| MOL005376 | RS18 | REN SHEN | 3exo_v | 0.9554 | P56817      | BACE1    |
| MOL005376 | RS18 | REN SHEN | 1ov4_v | 0.9123 | Q06520      | SULT2A1  |
| MOL005376 | RS18 | REN SHEN | 1n83_v | 0.9303 | RORA_HUMAN  | RORA     |
| MOL005376 | RS18 | REN SHEN | 1p49_v | 1      | STS_HUMAN   | STS      |
| MOL005376 | RS18 | REN SHEN | 1ijn_v | 0.9196 | TTHY_HUMAN  | TTR      |
| MOL005376 | RS18 | REN SHEN | 1j78_v | 0.9158 | VTDB_HUMAN  | GC       |
| MOL005401 | RS19 | REN SHEN | 1j96_v | 0.9928 | AK1C2_HUMAN | AKR1C2   |
| MOL005401 | RS19 | REN SHEN | 1e7a_v | 0.9926 | ALBU_HUMAN  | ALB      |
| MOL005401 | RS19 | REN SHEN | 2agt_v | 0.9537 | ALDR_HUMAN  | AKR1B1   |
| MOL005401 | RS19 | REN SHEN | 2q7j_v | 0.9831 | ANDR_HUMAN  | AR       |
| MOL005401 | RS19 | REN SHEN | 1oj9_v | 0.9871 | AOFB_HUMAN  | MAOB     |
| MOL005401 | RS19 | REN SHEN | 116l_v | 1      | APOA2_HUMAN | APOA2    |
| MOL005401 | RS19 | REN SHEN | 1reu_v | 1      | BMP2_HUMAN  | BMP2     |
| MOL005401 | RS19 | REN SHEN | 1okl_v | 0.9864 | CAH2_HUMAN  | CA2      |
| MOL005401 | RS19 | REN SHEN | 3dej_v | 0.9711 | CASP3_HUMAN | CASP3    |
| MOL005401 | RS19 | REN SHEN | 1shj_v | 0.9818 | CASP7_HUMAN | CASP7    |
| MOL005401 | RS19 | REN SHEN | 1vyw_v | 0.9384 | CCNA2_HUMAN | CCNA2    |
| MOL005401 | RS19 | REN SHEN | 1rs0_v | 0.9801 | CFAB_HUMAN  | CFB      |
| MOL005401 | RS19 | REN SHEN | 1tg6_v | 0.9561 | CLPP_HUMAN  | CLPP     |
| MOL005401 | RS19 | REN SHEN | 1yb1_v | 0.9191 | DHB11_HUMAN | HSD17B11 |
| MOL005401 | RS19 | REN SHEN | 1xdd_v | 0.9591 | ITAL_HUMAN  | ITGAL    |

|           |      |          |        |        |             |          |
|-----------|------|----------|--------|--------|-------------|----------|
| MOL005401 | RS19 | REN SHEN | 2pg2_v | 0.991  | KIF11_HUMAN | KIF11    |
| MOL005401 | RS19 | REN SHEN | 1pme_v | 0.9617 | MK01_HUMAN  | MAPK1    |
| MOL005401 | RS19 | REN SHEN | 1pmv_v | 0.9941 | MK10_HUMAN  | MAPK10   |
| MOL005401 | RS19 | REN SHEN | 1eub_v | 0.9207 | MMP13_HUMAN | MMP13    |
| MOL005401 | RS19 | REN SHEN | 2pin_v | 0.9538 | P10828      | THRB     |
| MOL005401 | RS19 | REN SHEN | 3bgp_v | 0.9781 | P11309      | PIM1     |
| MOL005401 | RS19 | REN SHEN | 1jvp_v | 0.9025 | P24941      | CDK2     |
| MOL005401 | RS19 | REN SHEN | 2jbp_v | 0.9853 | P49137      | MAPKAPK2 |
| MOL005401 | RS19 | REN SHEN | 1w8l_v | 0.9853 | P62937      | PPIA     |
| MOL005401 | RS19 | REN SHEN | 1v3q_v | 0.9689 | PNPH_HUMAN  | PNP      |
| MOL005401 | RS19 | REN SHEN | 1zgy_v | 0.9635 | PPARG_HUMAN | PPARG    |
| MOL005401 | RS19 | REN SHEN | 1a28_v | 0.9544 | PRGR_HUMAN  | PGR      |
| MOL005401 | RS19 | REN SHEN | 1w7h_v | 0.9138 | Q16539      | MAPK14   |
| MOL005401 | RS19 | REN SHEN | 1p49_v | 1      | STS_HUMAN   | STS      |
| MOL005401 | RS19 | REN SHEN | 1no9_v | 0.952  | THRB_HUMAN  | F2       |
| MOL005401 | RS19 | REN SHEN | 1dvz_v | 0.9624 | TTHY_HUMAN  | TTR      |
| MOL005401 | RS19 | REN SHEN | 1j78_v | 0.9572 | VTDB_HUMAN  | GC       |
| MOL000449 | RS2  | REN SHEN | 1j96_v | 0.999  | AK1C2_HUMAN | AKR1C2   |
| MOL000449 | RS2  | REN SHEN | 1e7e_v | 0.9871 | ALBU_HUMAN  | ALB      |
| MOL000449 | RS2  | REN SHEN | 1t63_v | 0.9069 | ANDR_HUMAN  | AR       |
| MOL000449 | RS2  | REN SHEN | 1oj9_v | 0.9863 | AOFB_HUMAN  | MAOB     |
| MOL000449 | RS2  | REN SHEN | 1l6l_v | 0.9804 | APOA2_HUMAN | APOA2    |
| MOL000449 | RS2  | REN SHEN | 1reu_v | 0.9914 | BMP2_HUMAN  | BMP2     |
| MOL000449 | RS2  | REN SHEN | 1if4_v | 0.9678 | CAH2_HUMAN  | CA2      |
| MOL000449 | RS2  | REN SHEN | 1shj_v | 0.968  | CASP7_HUMAN | CASP7    |
| MOL000449 | RS2  | REN SHEN | 1ybl_v | 0.9432 | DHB11_HUMAN | HSD17B11 |
| MOL000449 | RS2  | REN SHEN | 2pg2_v | 0.9585 | KIF11_HUMAN | KIF11    |
| MOL000449 | RS2  | REN SHEN | 2pin_v | 0.9721 | P10828      | THRB     |
| MOL000449 | RS2  | REN SHEN | 3bgp_v | 0.989  | P11309      | PIM1     |
| MOL000449 | RS2  | REN SHEN | 2jbp_v | 0.9934 | P49137      | MAPKAPK2 |
| MOL000449 | RS2  | REN SHEN | 1n83_v | 0.9599 | RORA_HUMAN  | RORA     |
| MOL000449 | RS2  | REN SHEN | 1p49_v | 0.9888 | STS_HUMAN   | STS      |
| MOL000449 | RS2  | REN SHEN | 1j78_v | 0.9045 | VTDB_HUMAN  | GC       |
| MOL005384 | RS20 | REN SHEN | 2pir_v | 0.928  | ANDR_HUMAN  | AR       |
| MOL005384 | RS20 | REN SHEN | 1lyw_v | 0.9134 | CATD_HUMAN  | CTSD     |
| MOL005384 | RS20 | REN SHEN | 1unh_v | 0.9909 | CD5R1_HUMAN | CDK5R1   |
| MOL005384 | RS20 | REN SHEN | 1rs0_v | 0.9375 | CFAB_HUMAN  | CFB      |
| MOL005384 | RS20 | REN SHEN | 2brb_v | 0.9541 | CHK1_HUMAN  | CHEK1    |
| MOL005384 | RS20 | REN SHEN | 1vec_v | 0.9609 | DDX6_HUMAN  | DDX6     |
| MOL005384 | RS20 | REN SHEN | 2ocf_v | 0.9689 | ESR1_HUMAN  | ESR1     |
| MOL005384 | RS20 | REN SHEN | 2jj3_v | 0.9868 | ESR2_HUMAN  | ESR2     |
| MOL005384 | RS20 | REN SHEN | 1lbk_v | 0.9679 | GSTP1_HUMAN | GSTP1    |

|           |      |          |        |        |             |          |
|-----------|------|----------|--------|--------|-------------|----------|
| MOL005384 | RS20 | REN SHEN | 2pg2_v | 0.9675 | KIF11_HUMAN | KIF11    |
| MOL005384 | RS20 | REN SHEN | 1pme_v | 0.9678 | MK01_HUMAN  | MAPK1    |
| MOL005384 | RS20 | REN SHEN | 1uki_v | 0.911  | MK08_HUMAN  | MAPK8    |
| MOL005384 | RS20 | REN SHEN | 1pmv_v | 0.9149 | MK10_HUMAN  | MAPK10   |
| MOL005384 | RS20 | REN SHEN | 830c_v | 0.9184 | MMP13_HUMAN | MMP13    |
| MOL005384 | RS20 | REN SHEN | 3dbu_v | 0.9726 | P00918      | CA2      |
| MOL005384 | RS20 | REN SHEN | 1w8l_v | 0.9899 | P62937      | PPIA     |
| MOL005384 | RS20 | REN SHEN | 1yxx_v | 0.9287 | PIM1_HUMAN  | PIM1     |
| MOL005384 | RS20 | REN SHEN | 1v3q_v | 0.9853 | PNPH_HUMAN  | PNP      |
| MOL005384 | RS20 | REN SHEN | 1no9_v | 0.9855 | THRB_HUMAN  | F2       |
| MOL005399 | RS5  | REN SHEN | 1j96_v | 0.9974 | AK1C2_HUMAN | AKR1C2   |
| MOL005399 | RS5  | REN SHEN | 1e7e_v | 0.976  | ALBU_HUMAN  | ALB      |
| MOL005399 | RS5  | REN SHEN | 1oj9_v | 0.998  | AOFB_HUMAN  | MAOB     |
| MOL005399 | RS5  | REN SHEN | 1l6l_v | 0.9473 | APOA2_HUMAN | APOA2    |
| MOL005399 | RS5  | REN SHEN | 3bmp_v | 0.9974 | BMP2_HUMAN  | BMP2     |
| MOL005399 | RS5  | REN SHEN | 1okl_v | 0.9556 | CAH2_HUMAN  | CA2      |
| MOL005399 | RS5  | REN SHEN | 1shj_v | 0.9667 | CASP7_HUMAN | CASP7    |
| MOL005399 | RS5  | REN SHEN | 1xdd_v | 0.916  | ITAL_HUMAN  | ITGAL    |
| MOL005399 | RS5  | REN SHEN | 2pg2_v | 0.94   | KIF11_HUMAN | KIF11    |
| MOL005399 | RS5  | REN SHEN | 1pme_v | 0.9093 | MK01_HUMAN  | MAPK1    |
| MOL005399 | RS5  | REN SHEN | 2pin_v | 0.9912 | P10828      | THRB     |
| MOL005399 | RS5  | REN SHEN | 3bgp_v | 0.9754 | P11309      | PIM1     |
| MOL005399 | RS5  | REN SHEN | 2jbp_v | 0.9856 | P49137      | 1APKAPK2 |
| MOL005399 | RS5  | REN SHEN | 1p49_v | 0.9733 | STS_HUMAN   | STS      |
| MOL005399 | RS5  | REN SHEN | 1j78_v | 0.9647 | VTDB_HUMAN  | GC       |
| MOL000787 | RS3  | REN SHEN | 1rs0_v | 0.9187 | CFAB_HUMAN  | CFB      |
| MOL000787 | RS3  | REN SHEN | 1p0i_v | 0.9305 | CHLE_HUMAN  | BCHE     |
| MOL000787 | RS3  | REN SHEN | 1pmv_v | 0.9438 | MK10_HUMAN  | MAPK10   |
| MOL000787 | RS3  | REN SHEN | 1hpk_v | 0.9526 | P00747      | PLG      |
| MOL000787 | RS3  | REN SHEN | 1dvz_v | 0.9306 | TTHY_HUMAN  | TTR      |
| MOL003648 | RS4  | REN SHEN | 1e7e_v | 0.9577 | ALBU_HUMAN  | ALB      |
| MOL003648 | RS4  | REN SHEN | 2pir_v | 0.9462 | ANDR_HUMAN  | AR       |
| MOL003648 | RS4  | REN SHEN | 1l6l_v | 0.9796 | APOA2_HUMAN | APOA2    |
| MOL003648 | RS4  | REN SHEN | 1reu_v | 0.971  | BMP2_HUMAN  | BMP2     |
| MOL003648 | RS4  | REN SHEN | 1rs0_v | 0.9792 | CFAB_HUMAN  | CFB      |
| MOL003648 | RS4  | REN SHEN | 1vec_v | 0.9839 | DDX6_HUMAN  | DDX6     |
| MOL003648 | RS4  | REN SHEN | 2ocf_v | 0.9618 | ESR1_HUMAN  | ESR1     |
| MOL003648 | RS4  | REN SHEN | 1md3_v | 0.9717 | GSTP1_HUMAN | GSTP1    |
| MOL003648 | RS4  | REN SHEN | 1uki_v | 0.92   | MK08_HUMAN  | MAPK8    |
| MOL003648 | RS4  | REN SHEN | 1pmv_v | 0.9095 | MK10_HUMAN  | MAPK10   |
| MOL003648 | RS4  | REN SHEN | 3dcw_v | 0.9858 | P00918      | CA2      |
| MOL003648 | RS4  | REN SHEN | 2obj_v | 0.9681 | P11309      | PIM1     |

|           |     |          |        |        |             |          |
|-----------|-----|----------|--------|--------|-------------|----------|
| MOL003648 | RS4 | REN SHEN | 1p49_v | 1      | STS_HUMAN   | STS      |
| MOL004492 | RS6 | REN SHEN | 1j96_v | 0.9963 | AK1C2_HUMAN | AKR1C2   |
| MOL004492 | RS6 | REN SHEN | 1e7e_v | 0.9965 | ALBU_HUMAN  | ALB      |
| MOL004492 | RS6 | REN SHEN | 2ama_v | 0.9314 | ANDR_HUMAN  | AR       |
| MOL004492 | RS6 | REN SHEN | 1hak_v | 0.9469 | ANXA5_HUMAN | ANXA5    |
| MOL004492 | RS6 | REN SHEN | 1oj9_v | 0.9948 | AOFB_HUMAN  | MAOB     |
| MOL004492 | RS6 | REN SHEN | 1l6l_v | 1      | APOA2_HUMAN | APOA2    |
| MOL004492 | RS6 | REN SHEN | 2q11_v | 0.9371 | BACE1_HUMAN | BACE1    |
| MOL004492 | RS6 | REN SHEN | 3bmp_v | 0.997  | BMP2_HUMAN  | BMP2     |
| MOL004492 | RS6 | REN SHEN | 1okl_v | 0.9839 | CAH2_HUMAN  | CA2      |
| MOL004492 | RS6 | REN SHEN | 3dej_v | 0.9931 | CASP3_HUMAN | CASP3    |
| MOL004492 | RS6 | REN SHEN | 1shj_v | 0.9873 | CASP7_HUMAN | CASP7    |
| MOL004492 | RS6 | REN SHEN | 1unh_v | 0.9182 | CD5R1_HUMAN | CDK5R1   |
| MOL004492 | RS6 | REN SHEN | 1rs0_v | 0.9161 | CFAB_HUMAN  | CFB      |
| MOL004492 | RS6 | REN SHEN | 2brb_v | 0.9229 | CHK1_HUMAN  | CHEK1    |
| MOL004492 | RS6 | REN SHEN | 1yb1_v | 0.9948 | DHB11_HUMAN | HSD17B11 |
| MOL004492 | RS6 | REN SHEN | 1ya8_v | 0.9271 | EST1_HUMAN  | CES1     |
| MOL004492 | RS6 | REN SHEN | 2j95_v | 0.9006 | FA10_HUMAN  | F10      |
| MOL004492 | RS6 | REN SHEN | 1f40_v | 0.9794 | FKB1A_HUMAN | FKBP1A   |
| MOL004492 | RS6 | REN SHEN | 1xdd_v | 0.996  | ITAL_HUMAN  | ITGAL    |
| MOL004492 | RS6 | REN SHEN | 2pg2_v | 0.9976 | KIF11_HUMAN | KIF11    |
| MOL004492 | RS6 | REN SHEN | 1pme_v | 0.9785 | MK01_HUMAN  | MAPK1    |
| MOL004492 | RS6 | REN SHEN | 2gmx_v | 0.9561 | MK08_HUMAN  | MAPK8    |
| MOL004492 | RS6 | REN SHEN | 1pmv_v | 0.9631 | MK10_HUMAN  | MAPK10   |
| MOL004492 | RS6 | REN SHEN | 1eub_v | 0.9987 | MMP13_HUMAN | MMP13    |
| MOL004492 | RS6 | REN SHEN | 1bm6_v | 0.933  | MMP3_HUMAN  | MMP3     |
| MOL004492 | RS6 | REN SHEN | 2pin_v | 0.9977 | P10828      | THRB     |
| MOL004492 | RS6 | REN SHEN | 3bgp_v | 0.9996 | P11309      | PIM1     |
| MOL004492 | RS6 | REN SHEN | 3eqm_v | 0.9734 | P11511      | CYP19A1  |
| MOL004492 | RS6 | REN SHEN | 2jbp_v | 0.9934 | P49137      | 4APKAPK2 |
| MOL004492 | RS6 | REN SHEN | 1w8l_v | 0.9596 | P62937      | PPIA     |
| MOL004492 | RS6 | REN SHEN | 1ih0_v | 0.9135 | P63316      | TNNC1    |
| MOL004492 | RS6 | REN SHEN | 1zgy_v | 0.9692 | PPARG_HUMAN | PPARG    |
| MOL004492 | RS6 | REN SHEN | 1a28_v | 0.9274 | PRGR_HUMAN  | PGR      |
| MOL004492 | RS6 | REN SHEN | 1n83_v | 0.9332 | RORA_HUMAN  | RORA     |
| MOL004492 | RS6 | REN SHEN | 1p49_v | 1      | STS_HUMAN   | STS      |
| MOL004492 | RS6 | REN SHEN | 1no9_v | 0.9822 | THRB_HUMAN  | F2       |
| MOL004492 | RS6 | REN SHEN | 1f86_v | 0.9982 | TTHY_HUMAN  | TTR      |
| MOL004492 | RS6 | REN SHEN | 1j78_v | 1      | VTDB_HUMAN  | GC       |
| MOL004492 | RS6 | REN SHEN | 1t84_v | 0.919  | WASP_HUMAN  | WAS      |
| MOL005308 | RS7 | REN SHEN | 1klt_v | 0.9468 | CMA1_HUMAN  | CMA1     |
| MOL005308 | RS7 | REN SHEN | 2g63_v | 0.9722 | DPP4_HUMAN  | DPP4     |



|           |     |          |        |        |             |        |
|-----------|-----|----------|--------|--------|-------------|--------|
| MOL005308 | RS7 | REN SHEN | 1pq9_v | 0.9471 | NR1H2_HUMAN | NR1H2  |
| MOL005308 | RS7 | REN SHEN | 1qmv_v | 0.9396 | P32119      | PRDX2  |
| MOL005308 | RS7 | REN SHEN | 1w8m_v | 0.9435 | P62937      | PPIA   |
| MOL005314 | RS8 | REN SHEN | 1uki_v | 0.9426 | MK08_HUMAN  | MAPK8  |
| MOL005314 | RS8 | REN SHEN | 1pmv_v | 0.949  | MK10_HUMAN  | MAPK10 |
| MOL005317 | RS9 | REN SHEN | 1if4_v | 0.9455 | CAH2_HUMAN  | CA2    |
| MOL005317 | RS9 | REN SHEN | 1lyw_v | 0.9398 | CATD_HUMAN  | CTSD   |
| MOL005317 | RS9 | REN SHEN | 1rs0_v | 0.9771 | CFAB_HUMAN  | CFB    |
| MOL005317 | RS9 | REN SHEN | 1p0i_v | 0.9421 | CHLE_HUMAN  | BCHE   |
| MOL005317 | RS9 | REN SHEN | 1klt_v | 0.9208 | CMA1_HUMAN  | CMA1   |
| MOL005317 | RS9 | REN SHEN | 1vec_v | 0.9736 | DDX6_HUMAN  | DDX6   |
| MOL005317 | RS9 | REN SHEN | 2onc_v | 0.9517 | DPP4_HUMAN  | DPP4   |
| MOL005317 | RS9 | REN SHEN | 1xkb_v | 0.9747 | FA10_HUMAN  | F10    |
| MOL005317 | RS9 | REN SHEN | 1ogs_v | 0.9686 | GLCM_HUMAN  | GBA    |
| MOL005317 | RS9 | REN SHEN | 1md3_v | 0.9813 | GSTP1_HUMAN | GSTP1  |
| MOL005317 | RS9 | REN SHEN | 1glq_v | 0.9778 | LYAM3_HUMAN | SELP   |
| MOL005317 | RS9 | REN SHEN | 1pmv_v | 0.996  | MK10_HUMAN  | MAPK10 |
| MOL005317 | RS9 | REN SHEN | 1bm6_v | 0.9793 | MMP3_HUMAN  | MMP3   |
| MOL005317 | RS9 | REN SHEN | 1pq9_v | 0.9575 | NR1H2_HUMAN | NR1H2  |
| MOL005317 | RS9 | REN SHEN | 1smd_v | 0.9343 | P04745      | AMY1A  |
| MOL005317 | RS9 | REN SHEN | 1w8m_v | 0.9762 | P62937      | PPIA   |
| MOL005317 | RS9 | REN SHEN | 2c3i_v | 0.9435 | PIM1_HUMAN  | PIM1   |
| MOL005317 | RS9 | REN SHEN | 1v3q_v | 0.981  | PNPH_HUMAN  | PNP    |
| MOL005317 | RS9 | REN SHEN | 1q8m_v | 0.9628 | Q9NP99      | TREM1  |
| MOL005317 | RS9 | REN SHEN | 1nub_v | 0.9191 | SPRC_HUMAN  | SPARC  |
| MOL005317 | RS9 | REN SHEN | 1no9_v | 0.9686 | THRB_HUMAN  | F2     |
| MOL005317 | RS9 | REN SHEN | 1a0l_v | 0.9287 | TRYB2_HUMAN | TPSB2  |

#### Detailed Information of 147 Genes

| Source | UNIPROT     | Genename |
|--------|-------------|----------|
| BZ2    | MK08_HUMAN  | MAPK8    |
| BZ2    | FKB1A_HUMAN | FKBP1A   |
| BZ2    | CHLE_HUMAN  | BCHE     |
| BZ3    | MMP3_HUMAN  | MMP3     |
| BZ3    | P35968      | KDR      |
| BZ3    | Q9NP99      | TREM1    |
| BZ4    | ITAL_HUMAN  | ITGAL    |
| FZ1    | NR1I3_HUMAN | NR1I3    |
| FZ11   | KIF11_HUMAN | KIF11    |
| FZ11   | AOFB_HUMAN  | MAOB     |
| FZ11   | MMP13_HUMAN | MMP13    |
| FZ11   | P49137      | MAPKAPK2 |

|      |             |         |
|------|-------------|---------|
| FZ11 | PIM1_HUMAN  | PIM1    |
| FZ11 | THRB_HUMAN  | F2      |
| FZ11 | PDE5A_HUMAN | PDE5A   |
| FZ11 | PNMT_HUMAN  | PNMT    |
| FZ12 | P32119      | PRDX2   |
| FZ12 | ADH1B_HUMAN | ADH1B   |
| FZ13 | P62937      | PPIA    |
| FZ13 | O15496      | PLA2G10 |
| FZ13 | VGFR2_HUMAN | KDR     |
| FZ14 | PH4H_HUMAN  | PAH     |
| FZ14 | UROK_HUMAN  | PLAU    |
| FZ15 | TTHY_HUMAN  | TTR     |
| FZ15 | P10828      | THRB    |
| FZ15 | CAH1_HUMAN  | CA1     |
| FZ16 | PRGR_HUMAN  | PGR     |
| FZ16 | DYR_HUMAN   | DHFR    |
| FZ17 | O76054      | SEC14L2 |
| FZ17 | P14061      | HSD17B1 |
| FZ17 | Q06520      | SULT2A1 |
| FZ17 | PPARG_HUMAN | PPARG   |
| FZ17 | P00747      | PLG     |
| FZ17 | WASP_HUMAN  | WAS     |
| FZ17 | PDE4D_HUMAN | PDE4D   |
| FZ17 | P62508      | ESRRG   |
| FZ17 | SHBG_HUMAN  | SHBG    |
| FZ17 | NR1H4_HUMAN | NR1H4   |
| FZ18 | ANPRC_HUMAN | NPR3    |
| FZ19 | CLPP_HUMAN  | CLPP    |
| A1   | CFAD_HUMAN  | CFD     |
| FZ3  | CASP3_HUMAN | CASP3   |
| FZ4  | BMP2_HUMAN  | BMP2    |
| FZ4  | NGAL_HUMAN  | LCN2    |
| FZ4  | GATM_HUMAN  | GATM    |
| FZ4  | FABP4_HUMAN | FABP4   |
| FZ5  | CATL2_HUMAN | CTSV    |
| FZ5  | TPA_HUMAN   | PLAT    |
| FZ6  | STS_HUMAN   | STS     |
| FZ6  | AK1C2_HUMAN | AKR1C2  |
| FZ6  | ALBU_HUMAN  | ALB     |
| FZ7  | GSTP1_HUMAN | GSTP1   |
| FZ9  | VTDB_HUMAN  | GC      |
| GC11 | Q16539      | MAPK14  |

|      |             |          |
|------|-------------|----------|
| GC12 | PK3CG_HUMAN | PIK3CG   |
| GC12 | P08069      | IGF1R    |
| GC15 | EST1_HUMAN  | CES1     |
| GC21 | CHK1_HUMAN  | CHEK1    |
| GC21 | P11142      | HSPA8    |
| GC21 | NQO1_HUMAN  | NQO1     |
| GC26 | CATD_HUMAN  | CTSD     |
| GC27 | GLCM_HUMAN  | GBA      |
| GC28 | P11309      | PIM1     |
| GC28 | SPRC_HUMAN  | SPARC    |
| GC29 | P56817      | BACE1    |
| GC32 | Q9BW91      | NUDT9    |
| GC32 | PDE4B_HUMAN | PDE4B    |
| GC32 | ANG1_HUMAN  | ANG      |
| GC32 | FCAR_HUMAN  | FCAR     |
| GC40 | CMA1_HUMAN  | CMA1     |
| GC40 | P00390      | GSR      |
| GC43 | TGFR2_HUMAN | TGFBR2   |
| GC45 | CAH2_HUMAN  | CA2      |
| GC45 | Q03181      | PPARD    |
| GC49 | AK1C3_HUMAN | AKR1C3   |
| GC49 | EPHB4_HUMAN | EPHB4    |
| GC53 | NR1H2_HUMAN | NR1H2    |
| GC54 | ESR2_HUMAN  | ESR2     |
| GC54 | EGFR_HUMAN  | EGFR     |
| GC54 | CAH12_HUMAN | CA12     |
| GC54 | RTN4R_HUMAN | RTN4R    |
| GC54 | Q13126      | MTAP     |
| GC56 | ALDR_HUMAN  | AKR1B1   |
| GC56 | CATS_HUMAN  | CTSS     |
| GC59 | CASP7_HUMAN | CASP7    |
| GC62 | ANDR_HUMAN  | AR       |
| GC67 | MK10_HUMAN  | MAPK10   |
| GC73 | HS90A_HUMAN | HSP90AA1 |
| GC74 | PTN1_HUMAN  | PTPN1    |
| GC75 | P11511      | CYP19A1  |
| GC77 | SEPR_HUMAN  | FAP      |
| GC77 | LKHA4_HUMAN | LTA4H    |
| GC80 | HCK_HUMAN   | HCK      |
| GC80 | Q62986      | Esr2     |
| GC82 | DHI1_HUMAN  | HSD11B1  |
| GC84 | RORA_HUMAN  | RORA     |

|      |             |          |
|------|-------------|----------|
| GC84 | MK01_HUMAN  | MAPK1    |
| GC84 | ESR1_HUMAN  | ESR1     |
| GC84 | P24941      | CDK2     |
| GC84 | PDPK1_HUMAN | PDPK1    |
| GJ2  | CFAB_HUMAN  | CFB      |
| GJ2  | PNPH_HUMAN  | PNP      |
| GJ3  | CDK6_HUMAN  | CDK6     |
| C1   | MCR_HUMAN   | NR3C2    |
| RS1  | P00918      | CA2      |
| RS1  | DDX6_HUMAN  | DDX6     |
| RS1  | ADA17_HUMAN | ADAM17   |
| RS1  | CATB_HUMAN  | CTSB     |
| RS10 | P52758      | RIDA     |
| RS10 | PRDX5_HUMAN | PRDX5    |
| RS10 | B3GA1_HUMAN | B3GAT1   |
| RS10 | P33176      | KIF5B    |
| RS10 | P78330      | PSPH     |
| RS10 | O15382      | BCAT2    |
| RS10 | P04745      | AMY1A    |
| RS10 | SRC_HUMAN   | SRC      |
| RS10 | P68400      | CSNK2A1  |
| RS10 | P02743      | APCS     |
| RS13 | CCNA2_HUMAN | CCNA2    |
| RS13 | P07900      | HSP90AA1 |
| RS14 | RXRA_HUMAN  | RXRA     |
| RS16 | P16083      | NQO2     |
| RS17 | BACE1_HUMAN | BACE1    |
| RS17 | QPCT_HUMAN  | QPCT     |
| RS17 | TGFR1_HUMAN | TGFBR1   |
| RS20 | CD5R1_HUMAN | CDK5R1   |
| RS6  | APOA2_HUMAN | APOA2    |
| RS6  | DHB11_HUMAN | HSD17B11 |
| RS6  | ANXA5_HUMAN | ANXA5    |
| RS6  | P63316      | TNNC1    |
| RS7  | DPP4_HUMAN  | DPP4     |
| RS9  | LYAM3_HUMAN | SELP     |
| RS9  | FA10_HUMAN  | F10      |
| RS9  | TRYB2_HUMAN | TPSB2    |
