# Supplementary material for: Action Mechanism Underlying Improvement Effect of Fuzi Lizhong Decoction on Nonalcoholic Fatty Liver Disease: A Study Based on Network Pharmacology and Molecular Docking
Source: Evid Based Complement Alternat Med. 2022 Jan 20;2022:1670014. doi: 10.1155/2022/1670014 (PMC8794673; doi:10.1155/2022/1670014)
Supplement: Supplementary Materials — Supplement Table 1: detailed information about the compound-target network. Supplement Table 2: information of 2,608 NAFLD-related targets. Supplement Table 3: information of 61 intersection targets between FLD and NAFLD. Supplement Table 4: detailed information about the protein-protein network. Supplement Table 5: detailed information about functional analysis. [file 1670014.f1.zip]

Archive with 5 entries (5 files):
- 1670014.f1/Supplement Table 1 Detailed information about the compound-target network.pdf
- 1670014.f1/Supplement Table 2 Information of 2,608 NAFLD-related targets.pdf
- 1670014.f1/Supplement Table 3 Information of 61 intersection targets between FLD and NAFLD.pdf
- 1670014.f1/Supplement Table 4 Detailed information about the protein-protein network.pdf
- 1670014.f1/Supplement Table 5 Detailed information about functional analysis.pdf
